# Supplementary material for: Decorin is an early CSF biomarker of Alzheimer’s Aβ amyloidosis
Source: Research Square preprint supplement (doi:10.21203/rs.3.rs-275229/v1), 2021-03-02
Supplement: Supplementary file 1 [file 3d97122a341c3f5f720643dd.xlsx]

## Sheet: AppNL-F vs Appwt
Supplementary Table 2: Alterations in proteins identifed in all samples of AppNL-F/NL-F vs Appwt/wt
Uniprot ID and Protein Name	log2 of LFQ intensity (Appwt/wt 1)	log2 of LFQ intensity (Appwt/wt 2)	log2 of LFQ intensity (Appwt/wt 3)	log2 of LFQ intensity (Appwt/wt 4)	log2 of LFQ intensity (AppNL-F/NL-F 1)	log2 of LFQ intensity (AppNL-F/NL-F 2)	log2 of LFQ intensity (AppNL-F/NL-F 3)	log2 of LFQ intensity (AppNL-F/NL-F 4)	Average Appwt/wt	Average AppNL-F/NL-F	Ratio AppNL-F/NL-F/Appwt/wt	P-value
sp|P12960|CNTN1_MOUSE Contactin-1 OS=Mus musculus GN=Cntn1 PE=1 SV=1	28.6313	28.8804	28.8424	29.0908	27.8539	28.2922	28.1136	28.2704	28.8612	28.1325	0.974751	0.00186952
tr|Q3UKR1|Q3UKR1_MOUSE Decorin OS=Mus musculus GN=Dcn PE=1 SV=1;sp|P28654|PGS2_MOUSE Decorin OS=Mus musculus GN=Dcn PE=1 SV=1;tr|Q3TSV1|Q3TSV1_MOUSE Decorin OS=Mus musculus GN=Dcn PE=2 SV=1	28.3927	28.2809	28.3009	28.2109	30.2287	29.6429	30.0128	28.9393	28.2963	29.7059	1.04981	0.0025975
sp|Q04447|KCRB_MOUSE Creatine kinase B-type OS=Mus musculus GN=Ckb PE=1 SV=1	28.7141	28.0571	27.4159	27.93	30.2695	29.4574	29.3769	29.5996	28.0293	29.6759	1.05874	0.00269215
sp|Q9WVJ3|CBPQ_MOUSE Carboxypeptidase Q OS=Mus musculus GN=Cpq PE=1 SV=1	26.8994	26.8948	27.039	27.0613	26.4775	26.77	26.56	26.4771	26.9736	26.5712	0.985079	0.00271113
sp|P97290|IC1_MOUSE Plasma protease C1 inhibitor OS=Mus musculus GN=Serping1 PE=1 SV=3;tr|A2ATR8|A2ATR8_MOUSE Plasma protease C1 inhibitor OS=Mus musculus GN=Serping1 PE=1 SV=1	28.9572	29.1554	29.1498	29.2386	28.3396	28.7333	28.5223	28.8661	29.1253	28.6153	0.98249	0.0078879
sp|P48036|ANXA5_MOUSE Annexin A5 OS=Mus musculus GN=Anxa5 PE=1 SV=1	27.4945	28.4423	27.736	27.1309	29.5697	29.4432	28.7022	28.6851	27.7009	29.1001	1.05051	0.00848698
tr|G3X9I1|G3X9I1_MOUSE DNA segment, Chr 6, Wayne State University 176, expressed, isoform CRA_a OS=Mus musculus GN=Fam3c PE=1 SV=1;sp|Q91VU0|FAM3C_MOUSE Protein FAM3C OS=Mus musculus GN=Fam3c PE=1 SV=1;tr|G5E911|G5E911_MOUSE DNA segment, Chr 6, Wayne State	26.305	26.4093	26.6697	26.7696	25.9365	26.1727	26.147	26.0428	26.5384	26.0747	0.982528	0.00875762
sp|Q61702|ITIH1_MOUSE Inter-alpha-trypsin inhibitor heavy chain H1 OS=Mus musculus GN=Itih1 PE=1 SV=2;tr|Q91WU7|Q91WU7_MOUSE Inter-alpha trypsin inhibitor, heavy chain 1 (Fragment) OS=Mus musculus GN=Itih1 PE=2 SV=1;tr|F8WJ05|F8WJ05_MOUSE Inter-alpha-tryps	25.665	25.509	25.1438	25.017	25.9385	26.4957	26.1637	25.8773	25.3337	26.1188	1.03099	0.00895311
tr|Q542G9|Q542G9_MOUSE Annexin OS=Mus musculus GN=Anxa2 PE=1 SV=1;sp|P07356|ANXA2_MOUSE Annexin A2 OS=Mus musculus GN=Anxa2 PE=1 SV=2;tr|Q9CZI7|Q9CZI7_MOUSE Annexin OS=Mus musculus GN=Anxa2 PE=2 SV=1;tr|Q3UCD3|Q3UCD3_MOUSE Annexin OS=Mus musculus GN=Anxa2	27.8141	28.6681	28.0288	27.5339	29.8851	29.1355	29.1036	28.8497	28.0112	29.2435	1.04399	0.00952116
sp|P0DP28|CALM3_MOUSE Calmodulin-3 OS=Mus musculus GN=Calm3 PE=1 SV=1;sp|P0DP27|CALM2_MOUSE Calmodulin-2 OS=Mus musculus GN=Calm2 PE=1 SV=1;sp|P0DP26|CALM1_MOUSE Calmodulin-1 OS=Mus musculus GN=Calm1 PE=1 SV=1;tr|Q3UKW2|Q3UKW2_MOUSE Calmodulin-1 OS=Mus mus	28.8141	28.7349	28.5537	28.4666	29.9606	29.404	29.5262	28.9671	28.6423	29.4645	1.0287	0.00954985
sp|P51885|LUM_MOUSE Lumican OS=Mus musculus GN=Lum PE=1 SV=2	30.5871	30.9391	30.1669	30.1331	31.842	31.0905	31.5113	31.1807	30.4565	31.4061	1.03118	0.010073
tr|Q3UTR7|Q3UTR7_MOUSE Angiotensinogen OS=Mus musculus GN=Agt PE=1 SV=1;sp|P11859|ANGT_MOUSE Angiotensinogen OS=Mus musculus GN=Agt PE=1 SV=1;tr|Q8VCN0|Q8VCN0_MOUSE Agt protein OS=Mus musculus GN=Agt PE=2 SV=1	30.8729	31.3366	31.5019	31.5636	30.4136	30.7348	30.4677	30.9091	31.3188	30.6313	0.978049	0.0123359
sp|P16045|LEG1_MOUSE Galectin-1 OS=Mus musculus GN=Lgals1 PE=1 SV=3	28.1051	28.4709	27.5769	27.7974	29.2625	28.6708	28.8924	28.4931	27.9876	28.8297	1.03009	0.0164339
tr|Q3TVS6|Q3TVS6_MOUSE Uncharacterized protein OS=Mus musculus GN=Ctsb PE=2 SV=1;sp|P10605|CATB_MOUSE Cathepsin B OS=Mus musculus GN=Ctsb PE=1 SV=2;tr|Q3TC17|Q3TC17_MOUSE Uncharacterized protein OS=Mus musculus GN=Ctsb PE=2 SV=1	29.2436	29.3612	29.5468	29.5934	28.6659	28.9317	29.0764	29.2089	29.4363	28.9707	0.984186	0.0168659
sp|P56480|ATPB_MOUSE ATP synthase subunit beta, mitochondrial OS=Mus musculus GN=Atp5b PE=1 SV=2	28.8455	27.8706	27.3572	27.1304	29.9927	30.303	29.5531	28.4821	27.8009	29.5827	1.06409	0.0178107
sp|P27773|PDIA3_MOUSE Protein disulfide-isomerase A3 OS=Mus musculus GN=Pdia3 PE=1 SV=2	27.1394	27.2321	26.8165	26.0313	28.3838	27.8722	27.9857	27.3759	26.8049	27.9044	1.04102	0.018414
tr|E9Q5L2|E9Q5L2_MOUSE Inter alpha-trypsin inhibitor, heavy chain 4 OS=Mus musculus GN=Itih4 PE=1 SV=1;tr|E9PVD2|E9PVD2_MOUSE Inter alpha-trypsin inhibitor, heavy chain 4 OS=Mus musculus GN=Itih4 PE=1 SV=1;sp|A6X935|ITIH4_MOUSE Inter alpha-trypsin inhibito	27.1284	26.7823	26.7913	25.4355	29.4247	27.444	28.116	28.1782	26.5344	28.2907	1.06619	0.0198504
sp|Q03265|ATPA_MOUSE ATP synthase subunit alpha, mitochondrial OS=Mus musculus GN=Atp5a1 PE=1 SV=1;tr|D3Z6F5|D3Z6F5_MOUSE ATP synthase subunit alpha OS=Mus musculus GN=Atp5a1 PE=1 SV=1	27.9267	27.443	26.9215	26.543	29.4465	30.246	28.7455	27.8405	27.2085	29.0696	1.0684	0.0202795
sp|P48678|LMNA_MOUSE Prelamin-A/C OS=Mus musculus GN=Lmna PE=1 SV=2	25.3019	29.1887	25.7242	26.9138	30.4088	29.518	29.6859	28.9668	26.7821	29.6449	1.10689	0.0208999
tr|Q9DC41|Q9DC41_MOUSE Uncharacterized protein OS=Mus musculus GN=Hspa5 PE=2 SV=1;tr|Q3U9G2|Q3U9G2_MOUSE Uncharacterized protein OS=Mus musculus GN=Hspa5 PE=2 SV=1;tr|Q3TWF2|Q3TWF2_MOUSE Uncharacterized protein OS=Mus musculus GN=Hspa5 PE=2 SV=1;sp|P20029|	26.8535	26.6351	26.4722	26.1956	27.4717	27.4071	27.2299	26.7369	26.5391	27.2114	1.02533	0.0209476
tr|Q3TYD5|Q3TYD5_MOUSE Uncharacterized protein OS=Mus musculus GN=Sparcl1 PE=2 SV=1;sp|P70663|SPRL1_MOUSE SPARC-like protein 1 OS=Mus musculus GN=Sparcl1 PE=1 SV=3;tr|Q3UYK7|Q3UYK7_MOUSE Uncharacterized protein OS=Mus musculus GN=Sparcl1 PE=2 SV=1	32.5321	33.3741	33.2147	33.728	31.8916	32.6968	32.2672	32.3097	33.2123	32.2914	0.972272	0.0219461
tr|Q3U7Z6|Q3U7Z6_MOUSE Phosphoglycerate mutase OS=Mus musculus GN=Pgam1 PE=1 SV=1;sp|Q9DBJ1|PGAM1_MOUSE Phosphoglycerate mutase 1 OS=Mus musculus GN=Pgam1 PE=1 SV=3;tr|Q6NWV5|Q6NWV5_MOUSE Pgam1 protein (Fragment) OS=Mus musculus GN=Pgam1 PE=2 SV=1	26.5325	26.2746	25.6668	25.5677	27.2194	26.7461	26.8179	26.5546	26.0104	26.8345	1.03168	0.0232692
tr|Q545I6|Q545I6_MOUSE Cathepsin Z, isoform CRA_b OS=Mus musculus GN=Ctsz PE=1 SV=1;sp|Q9WUU7|CATZ_MOUSE Cathepsin Z OS=Mus musculus GN=Ctsz PE=1 SV=1;tr|Q9ES94|Q9ES94_MOUSE Cathepsin Z OS=Mus musculus GN=Ctsz PE=2 SV=1	26.7723	26.9328	27.3333	27.1078	26.2104	26.6246	26.4896	26.7892	27.0365	26.5284	0.981207	0.0252907
tr|Q544Y7|Q544Y7_MOUSE Cofilin 1, non-muscle OS=Mus musculus GN=Cfl1 PE=2 SV=1;sp|P18760|COF1_MOUSE Cofilin-1 OS=Mus musculus GN=Cfl1 PE=1 SV=3;tr|F8WGL3|F8WGL3_MOUSE Cofilin-1 OS=Mus musculus GN=Cfl1 PE=1 SV=1;tr|Q9CX22|Q9CX22_MOUSE Uncharacterized protei	27.1963	26.6854	26.0736	26.1465	27.9678	27.1846	27.6424	27.1595	26.5255	27.4886	1.03631	0.0255484
tr|Q3UH39|Q3UH39_MOUSE Uncharacterized protein OS=Mus musculus GN=Cntn2 PE=2 SV=1;sp|Q61330|CNTN2_MOUSE Contactin-2 OS=Mus musculus GN=Cntn2 PE=1 SV=2;tr|Q3UGZ2|Q3UGZ2_MOUSE Uncharacterized protein OS=Mus musculus GN=Cntn2 PE=2 SV=1;tr|A0A087WQQ9|A0A087WQQ	26.298	27.3883	27.342	27.7487	25.346	26.4941	25.8074	26.3522	27.1943	25.9999	0.956081	0.0265196
tr|Q3TXR9|Q3TXR9_MOUSE Beta-hexosaminidase OS=Mus musculus GN=Hexb PE=1 SV=1;sp|P20060|HEXB_MOUSE Beta-hexosaminidase subunit beta OS=Mus musculus GN=Hexb PE=1 SV=2	29.3802	30.233	30.3957	30.573	29.0426	29.591	29.2948	29.3465	30.1455	29.3187	0.972575	0.0281448
sp|Q6GQT1|A2MG_MOUSE Alpha-2-macroglobulin-P OS=Mus musculus GN=A2m PE=2 SV=2	28.7416	29.175	29.3021	29.0902	27.9444	28.8071	28.2816	28.709	29.0772	28.4355	0.977932	0.0330507
sp|Q9QUN9|DKK3_MOUSE Dickkopf-related protein 3 OS=Mus musculus GN=Dkk3 PE=2 SV=1	29.297	30.0814	29.9893	30.3784	28.8046	29.4791	29.2982	29.2027	29.9365	29.1961	0.975267	0.0334373
tr|Q9D288|Q9D288_MOUSE Uncharacterized protein OS=Mus musculus PE=2 SV=1;tr|Q544K5|Q544K5_MOUSE C-type natriuretic peptide OS=Mus musculus GN=Nppc PE=2 SV=1;sp|Q61839|ANFC_MOUSE C-type natriuretic peptide OS=Mus musculus GN=Nppc PE=3 SV=1	25.9225	26.8175	26.946	27.0354	25.7491	26.2949	25.8645	25.8061	26.6804	25.9286	0.971825	0.0387035
sp|O09114|PTGDS_MOUSE Prostaglandin-H2 D-isomerase OS=Mus musculus GN=Ptgds PE=1 SV=1	34.4558	35.2204	35.4487	35.7295	34.2628	34.5584	34.542	34.5213	35.2136	34.4711	0.978915	0.0389063
sp|P46412|GPX3_MOUSE Glutathione peroxidase 3 OS=Mus musculus GN=Gpx3 PE=1 SV=2;tr|A0A1C7ZMZ5|A0A1C7ZMZ5_MOUSE Glutathione peroxidase (Fragment) OS=Mus musculus GN=Gpx3 PE=1 SV=1;tr|A0A1C7ZMZ7|A0A1C7ZMZ7_MOUSE Glutathione peroxidase 3 (Fragment) OS=Mus mus	27.8367	27.9826	27.415	27.4018	28.034	27.9321	28.2073	28.109	27.659	28.0706	1.01488	0.0411283
tr|D3Z396|D3Z396_MOUSE Neurotrimin OS=Mus musculus GN=Ntm PE=1 SV=1;tr|Q8BG33|Q8BG33_MOUSE Neurotrimin OS=Mus musculus GN=Ntm PE=1 SV=1;tr|Q3TYC2|Q3TYC2_MOUSE Uncharacterized protein OS=Mus musculus GN=Ntm PE=2 SV=1;sp|Q99PJ0|NTRI_MOUSE Neurotrimin OS=Mus	28.0489	28.8791	29.1272	29.2042	27.9068	28.1415	28.0215	28.3267	28.8149	28.0991	0.97516	0.04279
tr|A0A077S2U6|A0A077S2U6_MOUSE Lysozyme OS=Mus musculus GN=Lyz2 PE=1 SV=1;sp|P08905|LYZ2_MOUSE Lysozyme C-2 OS=Mus musculus GN=Lyz2 PE=1 SV=2	28.3871	29.3224	29.5822	29.5225	28.2179	28.8229	28.1964	28.3876	29.2036	28.4062	0.972697	0.0438771
tr|Z4YN57|Z4YN57_MOUSE Phosphoinositide-3-kinase-interacting protein 1 (Fragment) OS=Mus musculus GN=Pik3ip1 PE=1 SV=1;sp|Q7TMJ8|P3IP1_MOUSE Phosphoinositide-3-kinase-interacting protein 1 OS=Mus musculus GN=Pik3ip1 PE=2 SV=1;tr|F6S185|F6S185_MOUSE Phospho	26.8312	27.8614	27.9347	27.9349	26.4472	27.3453	26.6088	26.8037	27.6406	26.8012	0.969634	0.0455253
tr|Q3TBM1|Q3TBM1_MOUSE Alpha-mannosidase OS=Mus musculus GN=Man2b1 PE=2 SV=1;sp|O09159|MA2B1_MOUSE Lysosomal alpha-mannosidase OS=Mus musculus GN=Man2b1 PE=1 SV=4	25.4613	26.3282	26.7698	26.7272	24.9008	25.9239	25.4917	25.235	26.3216	25.3879	0.964525	0.0460628
sp|Q07456|AMBP_MOUSE Protein AMBP OS=Mus musculus GN=Ambp PE=1 SV=2	27.4122	27.1976	27.3903	27.232	27.6036	27.5211	27.346	27.7299	27.308	27.5502	1.00887	0.0470393
sp|Q61220|NELL2_MOUSE Protein kinase C-binding protein NELL2 OS=Mus musculus GN=Nell2 PE=1 SV=3;tr|Q8BM43|Q8BM43_MOUSE Uncharacterized protein (Fragment) OS=Mus musculus GN=Nell2 PE=2 SV=1;tr|Q8BM06|Q8BM06_MOUSE Uncharacterized protein OS=Mus musculus GN=N	27.3938	28.7352	28.3593	29.0639	27.1733	27.7737	27.3722	27.451	28.3881	27.4426	0.966694	0.0482463
tr|A0A087WSN6|A0A087WSN6_MOUSE Fibronectin OS=Mus musculus GN=Fn1 PE=1 SV=1;tr|B9EHT6|B9EHT6_MOUSE Fibronectin OS=Mus musculus GN=Fn1 PE=1 SV=1;tr|Q3UGY5|Q3UGY5_MOUSE Uncharacterized protein OS=Mus musculus GN=Fn1 PE=2 SV=1;tr|A0A087WR50|A0A087WR50_MOUSE F	30.3312	30.8259	31.1625	31.3812	29.6192	30.5048	30.384	30.2231	30.9252	30.1828	0.975992	0.048923
tr|Q3TAZ7|Q3TAZ7_MOUSE Uncharacterized protein OS=Mus musculus GN=Csf1r PE=2 SV=1;tr|Q3U4N8|Q3U4N8_MOUSE Receptor protein-tyrosine kinase (Fragment) OS=Mus musculus GN=Csf1r PE=2 SV=1;tr|Q3U1X4|Q3U1X4_MOUSE Receptor protein-tyrosine kinase (Fragment) OS=Mu	27.0495	27.4394	27.7443	27.616	26.6614	27.1974	26.9119	27.1923	27.4623	26.9908	0.98283	0.0549578
tr|Q8CEH8|Q8CEH8_MOUSE Profilin OS=Mus musculus GN=Pfn1 PE=2 SV=1;tr|Q5SX50|Q5SX50_MOUSE Profilin OS=Mus musculus GN=Pfn1 PE=1 SV=1;sp|P62962|PROF1_MOUSE Profilin-1 OS=Mus musculus GN=Pfn1 PE=1 SV=2;tr|Q3U7V7|Q3U7V7_MOUSE Profilin OS=Mus musculus GN=Pfn1 P	26.3553	25.623	25.2849	25.1713	26.883	25.9954	26.7023	26.0874	25.6086	26.417	1.03157	0.0582768
tr|Q3UI56|Q3UI56_MOUSE Annexin OS=Mus musculus GN=Anxa6 PE=2 SV=1;sp|P14824|ANXA6_MOUSE Annexin A6 OS=Mus musculus GN=Anxa6 PE=1 SV=3;tr|F8WIT2|F8WIT2_MOUSE Annexin OS=Mus musculus GN=Anxa6 PE=1 SV=1;tr|Q3TUI1|Q3TUI1_MOUSE Annexin OS=Mus musculus GN=Anxa6	27.611	28.1464	26.8411	26.1579	29.3747	29.194	28.2425	27.5859	27.1891	28.5993	1.05187	0.0584836
tr|Q3U8F7|Q3U8F7_MOUSE Uncharacterized protein OS=Mus musculus GN=Npc2 PE=2 SV=1;tr|Q3U3C2|Q3U3C2_MOUSE Uncharacterized protein OS=Mus musculus GN=Npc2 PE=2 SV=1;sp|Q9Z0J0|NPC2_MOUSE Epididymal secretory protein E1 OS=Mus musculus GN=Npc2 PE=1 SV=1;tr|Q3TX	26.3297	26.9662	26.8416	26.9395	26.0355	26.6687	26.3449	26.1396	26.7693	26.2972	0.982365	0.0600131
tr|Q5FWJ3|Q5FWJ3_MOUSE Vimentin OS=Mus musculus GN=Vim PE=1 SV=1;tr|Q3U6S1|Q3U6S1_MOUSE Uncharacterized protein OS=Mus musculus GN=Vim PE=2 SV=1;sp|P20152|VIME_MOUSE Vimentin OS=Mus musculus GN=Vim PE=1 SV=3;tr|Q3V2S4|Q3V2S4_MOUSE Uncharacterized protein O	30.1021	29.8026	28.2728	29.2144	31.0922	30.6902	30.8165	29.5826	29.348	30.5454	1.0408	0.0616031
tr|Q3UWP8|Q3UWP8_MOUSE Uncharacterized protein (Fragment) OS=Mus musculus GN=Calr PE=2 SV=1;tr|B2MWM9|B2MWM9_MOUSE Calreticulin OS=Mus musculus GN=Calr PE=1 SV=1;sp|P14211|CALR_MOUSE Calreticulin OS=Mus musculus GN=Calr PE=1 SV=1	27.1231	27.5806	27.5023	27.0834	28.1662	27.8085	27.8749	27.3563	27.3224	27.8015	1.01754	0.0632906
tr|Q3U6E4|Q3U6E4_MOUSE Uncharacterized protein OS=Mus musculus GN=Ptma PE=2 SV=1;tr|Q0VGU2|Q0VGU2_MOUSE Prothymosin alpha OS=Mus musculus GN=Ptma PE=1 SV=1;sp|P26350|PTMA_MOUSE Prothymosin alpha OS=Mus musculus GN=Ptma PE=1 SV=2;tr|Q8CAQ5|Q8CAQ5_MOUSE MCG1	26.0971	26.7223	26.5737	26.0893	27.3656	26.669	27.2475	26.5401	26.3706	26.9555	1.02218	0.0674437
tr|Q3UBA6|Q3UBA6_MOUSE Uncharacterized protein OS=Mus musculus GN=Hspa8 PE=2 SV=1;tr|Q3TZJ3|Q3TZJ3_MOUSE Uncharacterized protein OS=Mus musculus GN=Hspa8 PE=2 SV=1;tr|Q3TH56|Q3TH56_MOUSE Uncharacterized protein OS=Mus musculus GN=Hspa8 PE=2 SV=1;tr|Q3TEK2|	29.4023	28.6457	28.6193	27.846	29.7951	29.8426	29.4488	28.878	28.6283	29.4911	1.03014	0.067776
tr|Q4FK40|Q4FK40_MOUSE Apoe protein OS=Mus musculus GN=Apoe PE=2 SV=1;tr|Q3UBS0|Q3UBS0_MOUSE Uncharacterized protein OS=Mus musculus GN=Apoe PE=2 SV=1;tr|Q3TXU4|Q3TXU4_MOUSE Apolipoprotein E, isoform CRA_h OS=Mus musculus GN=Apoe PE=1 SV=1;sp|P08226|APOE_M	33.1681	34.2015	34.0477	34.2766	32.8829	33.6873	33.3028	33.0706	33.9235	33.2359	0.979732	0.0679313
sp|Q03157|APLP1_MOUSE Amyloid-like protein 1 OS=Mus musculus GN=Aplp1 PE=1 SV=1;tr|Q3U311|Q3U311_MOUSE Uncharacterized protein OS=Mus musculus GN=Aplp1 PE=2 SV=1;tr|A0A0R4IZZ1|A0A0R4IZZ1_MOUSE Amyloid beta (A4)-like protein 1 OS=Mus musculus GN=Aplp1 PE=1	30.367	31.1959	31.0389	31.6234	29.9809	30.6103	30.5984	30.4862	31.0563	30.4189	0.979477	0.0779808
tr|Q4VAI2|Q4VAI2_MOUSE Acid phosphatase 1, soluble OS=Mus musculus GN=Acp1 PE=2 SV=1;sp|Q9D358|PPAC_MOUSE Low molecular weight phosphotyrosine protein phosphatase OS=Mus musculus GN=Acp1 PE=1 SV=3;tr|A0A1W2P7X3|A0A1W2P7X3_MOUSE Low molecular weight phospho	25.8987	24.8433	24.6931	24.6255	25.7217	25.4531	25.9876	25.5981	25.0152	25.6901	1.02698	0.0786251
sp|P47867|SCG3_MOUSE Secretogranin-3 OS=Mus musculus GN=Scg3 PE=1 SV=1	30.3106	31.0144	31.0583	31.4108	29.9963	30.727	30.4445	30.3049	30.9485	30.3682	0.981248	0.0801625
tr|Q5SVY2|Q5SVY2_MOUSE Peptidyl-prolyl cis-trans isomerase OS=Mus musculus GN=Ppia PE=1 SV=1;tr|Q3UAJ1|Q3UAJ1_MOUSE Peptidyl-prolyl cis-trans isomerase OS=Mus musculus GN=Ppia PE=2 SV=1;tr|Q3TE63|Q3TE63_MOUSE Peptidyl-prolyl cis-trans isomerase OS=Mus musc	29.9339	29.341	29.2523	29.1743	30.6023	29.6273	30.3233	29.6592	29.4254	30.053	1.02133	0.0802623
sp|P09813|APOA2_MOUSE Apolipoprotein A-II OS=Mus musculus GN=Apoa2 PE=1 SV=2;tr|A7YL62|A7YL62_MOUSE Apolipoprotein A-II OS=Mus musculus GN=Apoa2 PE=4 SV=1	29.6961	29.0987	28.2026	29.0906	29.4834	29.3429	30.361	30.3589	29.022	29.8865	1.02979	0.0809828
tr|Q3UBR4|Q3UBR4_MOUSE Uncharacterized protein OS=Mus musculus GN=Ctss PE=2 SV=1;sp|O70370|CATS_MOUSE Cathepsin S OS=Mus musculus GN=Ctss PE=1 SV=2;tr|F6WR04|F6WR04_MOUSE Cathepsin S OS=Mus musculus GN=Ctss PE=1 SV=1;tr|Q8BSZ5|Q8BSZ5_MOUSE Cathepsin S OS=M	29.0897	29.874	30.0989	30.1298	28.8185	29.5629	29.2706	29.1772	29.7981	29.2073	0.980174	0.0855051
sp|Q8BND5|QSOX1_MOUSE Sulfhydryl oxidase 1 OS=Mus musculus GN=Qsox1 PE=1 SV=1	27.9586	27.9076	28.3198	28.4981	27.7648	28.0128	27.8227	27.84	28.171	27.8601	0.988962	0.0870114
tr|Q53ZT3|Q53ZT3_MOUSE Amyloid-beta protein-like protein long isoform OS=Mus musculus GN=App PE=2 SV=1;sp|P12023|A4_MOUSE Amyloid-beta A4 protein OS=Mus musculus GN=App PE=1 SV=3;tr|Q3TWF3|Q3TWF3_MOUSE Uncharacterized protein OS=Mus musculus GN=App PE=2 SV	30.8931	32.0088	31.7321	32.3459	30.6355	31.3773	31.2008	30.9392	31.745	31.0382	0.977735	0.0899653
tr|B2RWX2|B2RWX2_MOUSE Complement component 4B (Childo blood group) OS=Mus musculus GN=C4b PE=2 SV=1;sp|P01029|CO4B_MOUSE Complement C4-B OS=Mus musculus GN=C4b PE=1 SV=3;tr|B2RXW7|B2RXW7_MOUSE Complement component 4B (Childo blood group) OS=Mus musculus G	29.9857	30.3641	30.5806	30.6706	29.8827	30.1887	29.889	30.217	30.4002	30.0443	0.988293	0.0923008
sp|Q8R429|AT2A1_MOUSE Sarcoplasmic/endoplasmic reticulum calcium ATPase 1 OS=Mus musculus GN=Atp2a1 PE=1 SV=1	29.2213	27.8204	27.5247	26.759	29.4615	29.9421	29.17	27.9421	27.8313	29.1289	1.04662	0.100183
tr|B2CQD6|B2CQD6_MOUSE Fibulin-1 OS=Mus musculus GN=Fbln1 PE=2 SV=1;sp|Q08879|FBLN1_MOUSE Fibulin-1 OS=Mus musculus GN=Fbln1 PE=1 SV=2;tr|Q3TWK8|Q3TWK8_MOUSE Fibulin-1 OS=Mus musculus GN=Fbln1 PE=2 SV=1	26.7981	27.9573	27.9126	28.7733	26.7405	27.3508	27.1008	26.9535	27.8603	27.0364	0.970427	0.100872
tr|Q3UWS9|Q3UWS9_MOUSE Uncharacterized protein (Fragment) OS=Mus musculus GN=Prdx5 PE=2 SV=1;tr|Q3U7H9|Q3U7H9_MOUSE Uncharacterized protein (Fragment) OS=Mus musculus GN=Prdx5 PE=2 SV=1;sp|P99029|PRDX5_MOUSE Peroxiredoxin-5, mitochondrial OS=Mus musculus G	26.5681	26.4114	25.1427	25.8691	26.9164	27.2844	26.6974	26.1661	25.9978	26.7661	1.02955	0.101741
sp|P06909|CFAH_MOUSE Complement factor H OS=Mus musculus GN=Cfh PE=1 SV=2;tr|E9Q8I0|E9Q8I0_MOUSE Complement factor H OS=Mus musculus GN=Cfh PE=1 SV=1;tr|D6RGQ0|D6RGQ0_MOUSE Complement factor H OS=Mus musculus GN=Cfh PE=1 SV=1;tr|E9Q8H9|E9Q8H9_MOUSE Complem	31.1451	31.8133	31.8966	31.8964	30.9696	31.3838	31.2556	31.5103	31.6878	31.2798	0.987124	0.107372
sp|P26339|CMGA_MOUSE Chromogranin-A OS=Mus musculus GN=Chga PE=1 SV=1;tr|Q3UN28|Q3UN28_MOUSE Uncharacterized protein OS=Mus musculus GN=Chga PE=2 SV=1	30.8099	31.919	32.1479	32.453	30.7117	31.4631	31.0006	31.1931	31.8324	31.0921	0.976744	0.107463
sp|Q99KI0|ACON_MOUSE Aconitate hydratase, mitochondrial OS=Mus musculus GN=Aco2 PE=1 SV=1	29.1436	28.5693	28.4501	27.0675	29.5987	29.7231	29.3183	28.4929	28.3076	29.2832	1.03446	0.109715
tr|Q9D2D1|Q9D2D1_MOUSE Carboxypeptidase OS=Mus musculus GN=Ctsa PE=2 SV=1;tr|Q544R6|Q544R6_MOUSE Carboxypeptidase OS=Mus musculus GN=Ctsa PE=1 SV=1;sp|P16675|PPGB_MOUSE Lysosomal protective protein OS=Mus musculus GN=Ctsa PE=1 SV=1;tr|G3X8T3|G3X8T3_MOUSE C	25.8778	26.1048	26.3975	26.8058	25.6081	26.0207	25.8776	26.023	26.2965	25.8823	0.984252	0.112442
sp|P68368|TBA4A_MOUSE Tubulin alpha-4A chain OS=Mus musculus GN=Tuba4a PE=1 SV=1;tr|A0A0A0MQA5|A0A0A0MQA5_MOUSE Tubulin alpha chain (Fragment) OS=Mus musculus GN=Tuba4a PE=1 SV=1	28.1848	26.7234	25.912	26.3402	28.3231	28.1468	28.0596	26.9503	26.7901	27.8699	1.04031	0.113736
sp|P68134|ACTS_MOUSE Actin, alpha skeletal muscle OS=Mus musculus GN=Acta1 PE=1 SV=1;tr|Q9CXK3|Q9CXK3_MOUSE Uncharacterized protein OS=Mus musculus GN=Actc1 PE=2 SV=1;tr|Q497E4|Q497E4_MOUSE Actin, alpha, cardiac muscle 1 OS=Mus musculus GN=Actc1 PE=2 SV=1;	31.6764	31.1344	30.9425	30.7021	31.8177	31.615	31.7819	31.1467	31.1138	31.5903	1.01531	0.114815
sp|O89020|AFAM_MOUSE Afamin OS=Mus musculus GN=Afm PE=1 SV=2	29.6329	29.2834	29.1274	29.2529	28.7463	28.6016	29.1462	29.3265	29.3242	28.9552	0.987417	0.115761
sp|P54071|IDHP_MOUSE Isocitrate dehydrogenase [NADP], mitochondrial OS=Mus musculus GN=Idh2 PE=1 SV=3;tr|D6RIL6|D6RIL6_MOUSE Isocitrate dehydrogenase [NADP], mitochondrial OS=Mus musculus GN=Idh2 PE=1 SV=1	27.9639	27.4122	26.734	26.4069	28.5285	28.5116	28.0256	27.0497	27.1292	28.0289	1.03316	0.1168
sp|Q07797|LG3BP_MOUSE Galectin-3-binding protein OS=Mus musculus GN=Lgals3bp PE=1 SV=1	25.9102	26.1805	26.4582	26.0504	25.6951	25.879	25.9933	26.0242	26.1498	25.8979	0.990367	0.11861
tr|Q9QYT9|Q9QYT9_MOUSE Major prion protein OS=Mus musculus GN=Prnpb PE=3 SV=1;tr|Q4FJQ7|Q4FJQ7_MOUSE Major prion protein OS=Mus musculus GN=Prnp PE=1 SV=1;tr|Q3UBH0|Q3UBH0_MOUSE Major prion protein OS=Mus musculus GN=Prnp PE=2 SV=1;tr|Q3TZI7|Q3TZI7_MOUSE M	28.4711	29.0001	28.8477	29.241	28.2856	28.7086	28.7853	28.1076	28.89	28.4718	0.985525	0.118767
sp|P51910|APOD_MOUSE Apolipoprotein D OS=Mus musculus GN=Apod PE=1 SV=1	30.7956	31.2214	31.1664	31.6462	30.1855	31.4108	30.2704	30.5769	31.2074	30.6109	0.980887	0.120133
tr|B2RXY1|B2RXY1_MOUSE Spock1 protein OS=Mus musculus GN=Spock1 PE=2 SV=1;tr|Q6DIC9|Q6DIC9_MOUSE Sparc/osteonectin, cwcv and kazal-like domains proteoglycan 1 OS=Mus musculus GN=Spock1 PE=1 SV=1;tr|Q8BKQ3|Q8BKQ3_MOUSE Testican-1 OS=Mus musculus GN=Spock1 P	25.4952	26.2375	26.1437	26.1415	25.3463	25.9095	25.564	25.701	26.0045	25.6302	0.985608	0.122274
sp|P10649|GSTM1_MOUSE Glutathione S-transferase Mu 1 OS=Mus musculus GN=Gstm1 PE=1 SV=2;tr|A2AE89|A2AE89_MOUSE Glutathione S-transferase Mu 1 OS=Mus musculus GN=Gstm1 PE=1 SV=2	29.9608	29.1021	28.4598	28.4606	29.9389	29.7925	30.0785	29.1233	28.9958	29.7333	1.02543	0.124883
tr|Q3V1T9|Q3V1T9_MOUSE Plasminogen OS=Mus musculus GN=Plg PE=2 SV=1;sp|P20918|PLMN_MOUSE Plasminogen OS=Mus musculus GN=Plg PE=1 SV=3;tr|Q6TCI0|Q6TCI0_MOUSE Angiostatin OS=Mus musculus GN=Plg PE=2 SV=1	31.092	31.7728	31.4503	31.6077	30.7936	30.7058	31.1223	31.5721	31.4807	31.0484	0.98627	0.127094
sp|P63028|TCTP_MOUSE Translationally-controlled tumor protein OS=Mus musculus GN=Tpt1 PE=1 SV=1;tr|D3YU75|D3YU75_MOUSE Translationally-controlled tumor protein OS=Mus musculus GN=Tpt1 PE=1 SV=1	26.3938	25.9329	25.4158	25.3626	26.7374	25.9882	26.5851	25.9772	25.7763	26.3219	1.02117	0.132363
sp|P08249|MDHM_MOUSE Malate dehydrogenase, mitochondrial OS=Mus musculus GN=Mdh2 PE=1 SV=3	29.2514	28.369	28.4109	27.2718	29.6612	29.4843	29.3132	28.325	28.3258	29.1959	1.03072	0.135033
sp|P13020|GELS_MOUSE Gelsolin OS=Mus musculus GN=Gsn PE=1 SV=3;tr|A0A0J9YUQ8|A0A0J9YUQ8_MOUSE Gelsolin (Fragment) OS=Mus musculus GN=Gsn PE=1 SV=1	32.0878	32.3099	32.0055	32.5965	31.7123	32.0436	32.2209	31.8328	32.25	31.9524	0.990773	0.137543
sp|P29788|VTNC_MOUSE Vitronectin OS=Mus musculus GN=Vtn PE=1 SV=2	29.474	30.2288	30.0844	30.73	29.2126	30.0006	29.55	29.6762	30.1293	29.6099	0.98276	0.140087
sp|P47879|IBP4_MOUSE Insulin-like growth factor-binding protein 4 OS=Mus musculus GN=Igfbp4 PE=1 SV=2;tr|H3BLB7|H3BLB7_MOUSE Insulin-like growth factor-binding protein 4 OS=Mus musculus GN=Igfbp4 PE=1 SV=1;tr|Q8BSM9|Q8BSM9_MOUSE Uncharacterized protein OS=	26.4581	27.2264	27.2132	27.1787	26.2637	26.9661	26.7672	26.4101	27.0191	26.6018	0.984556	0.142058
tr|A8DUP7|A8DUP7_MOUSE Beta-globin OS=Mus musculus GN=Hbbt1 PE=3 SV=1;tr|D0U270|D0U270_MUSMC Beta-globin OS=Mus musculus castaneus GN=Hbbt1 PE=3 SV=1;tr|D0U269|D0U269_MUSMC Beta-globin OS=Mus musculus castaneus GN=Hbbt1 PE=3 SV=1;tr|A8DUK0|A8DUK0_MOUSE Bet	31.1408	29.13	30.3828	28.9209	30.8972	30.6605	30.7143	30.8815	29.8936	30.7884	1.02993	0.142119
sp|P97467|AMD_MOUSE Peptidyl-glycine alpha-amidating monooxygenase OS=Mus musculus GN=Pam PE=1 SV=2;tr|F8VQA4|F8VQA4_MOUSE Peptidyl-glycine alpha-amidating monooxygenase OS=Mus musculus GN=Pam PE=1 SV=1;tr|E9Q704|E9Q704_MOUSE Peptidyl-glycine alpha-amidati	27.25	27.8362	27.8466	28.2396	26.9503	27.7224	27.1894	27.5174	27.7931	27.3449	0.983872	0.143368
tr|Q3V2G1|Q3V2G1_MOUSE Uncharacterized protein OS=Mus musculus GN=Apoa1 PE=2 SV=1;sp|Q00623|APOA1_MOUSE Apolipoprotein A-I OS=Mus musculus GN=Apoa1 PE=1 SV=2;tr|Q58EV2|Q58EV2_MOUSE Apoa1 protein OS=Mus musculus GN=Apoa1 PE=2 SV=1	33.1551	33.5366	32.7501	32.6052	32.8494	33.7693	33.5911	34.2418	33.0117	33.6129	1.01821	0.143597
sp|Q61147|CERU_MOUSE Ceruloplasmin OS=Mus musculus GN=Cp PE=1 SV=2;tr|E9PZD8|E9PZD8_MOUSE Ceruloplasmin OS=Mus musculus GN=Cp PE=1 SV=1;tr|G3X9T8|G3X9T8_MOUSE Ceruloplasmin OS=Mus musculus GN=Cp PE=1 SV=1;tr|G3X8Q5|G3X8Q5_MOUSE Ceruloplasmin OS=Mus musculu	31.285	31.6271	31.6636	31.5215	31.0314	31.3319	31.2556	31.5613	31.5243	31.2951	0.992728	0.149236
tr|Q3TY66|Q3TY66_MOUSE Chromogranin B OS=Mus musculus GN=Chgb PE=1 SV=1;sp|P16014|SCG1_MOUSE Secretogranin-1 OS=Mus musculus GN=Chgb PE=1 SV=2;tr|Q8BP91|Q8BP91_MOUSE Uncharacterized protein OS=Mus musculus GN=Chgb PE=2 SV=1;tr|Q3UZU8|Q3UZU8_MOUSE Uncharact	31.6809	32.5242	32.7138	33.0156	31.6447	32.3231	31.8719	31.988	32.4836	31.9569	0.983786	0.149898
tr|Q9QZ83|Q9QZ83_MOUSE Gamma actin-like protein OS=Mus musculus GN=Actg1 PE=2 SV=1	30.2233	29.5104	29.0285	29.3453	30.9176	29.5859	30.6411	29.7042	29.5269	30.2122	1.02321	0.152366
tr|Q3U0Z1|Q3U0Z1_MOUSE Uncharacterized protein OS=Mus musculus GN=Coch PE=2 SV=1;sp|Q62507|COCH_MOUSE Cochlin OS=Mus musculus GN=Coch PE=1 SV=2	28.21	27.398	27.8567	28.3105	27.0979	27.4143	27.7951	27.7475	27.9438	27.5137	0.984607	0.152518
sp|Q61477|NBL1_MOUSE Neuroblastoma suppressor of tumorigenicity 1 OS=Mus musculus GN=Nbl1 PE=1 SV=2	27.2677	27.6362	28.0205	28.1063	26.812	27.8301	27.1157	27.3796	27.7577	27.2844	0.982948	0.152894
tr|Q9CWS5|Q9CWS5_MOUSE Uncharacterized protein OS=Mus musculus PE=2 SV=1	34.2301	32.0738	33.4693	31.8596	33.9292	33.4758	33.8215	34.1676	32.9082	33.8485	1.02857	0.159047
tr|A0A1W2P7Y9|A0A1W2P7Y9_MOUSE Neuronal cell adhesion molecule OS=Mus musculus GN=Nrcam PE=1 SV=1;sp|Q810U4|NRCAM_MOUSE Neuronal cell adhesion molecule OS=Mus musculus GN=Nrcam PE=1 SV=2	27.7033	29.1637	29.0523	29.5234	27.7376	28.5185	28.2207	28.2084	28.8606	28.1713	0.976115	0.160093
sp|Q9CRB6|TPPP3_MOUSE Tubulin polymerization-promoting protein family member 3 OS=Mus musculus GN=Tppp3 PE=1 SV=1;tr|Q1JPR8|Q1JPR8_MOUSE Tppp3 protein (Fragment) OS=Mus musculus GN=Tppp3 PE=2 SV=1	26.8762	26.0246	25.3066	25.2902	27.2324	26.5825	27.0026	25.8073	25.8744	26.6562	1.03022	0.160898
tr|A0A0A6YY91|A0A0A6YY91_MOUSE Neural cell adhesion molecule 1 (Fragment) OS=Mus musculus GN=Ncam1 PE=1 SV=1	28.7613	29.7234	29.5517	30.1591	28.7049	29.3599	29.012	29.0988	29.5489	29.0439	0.982911	0.167541
tr|Q5FW97|Q5FW97_MOUSE Enolase 1, alpha non-neuron OS=Mus musculus GN=EG433182 PE=1 SV=1;sp|P17182|ENOA_MOUSE Alpha-enolase OS=Mus musculus GN=Eno1 PE=1 SV=3;tr|Q6PHC1|Q6PHC1_MOUSE Alpha-enolase OS=Mus musculus GN=Eno1 PE=1 SV=1	30.1077	29.4916	29.3295	28.9261	30.1667	29.88	30.0034	29.546	29.4638	29.8991	1.01477	0.168952
tr|Q3U5K7|Q3U5K7_MOUSE Cystatin (Fragment) OS=Mus musculus GN=Cst3 PE=2 SV=1;sp|P21460|CYTC_MOUSE Cystatin-C OS=Mus musculus GN=Cst3 PE=1 SV=2;tr|Q9EPX9|Q9EPX9_MOUSE Cystatin OS=Mus musculus GN=Cst3 PE=2 SV=1;tr|A2APX3|A2APX3_MOUSE Cystatin (Fragment) OS=M	33.6274	34.4969	34.5976	34.9042	33.5696	34.2425	34.0391	33.8936	34.4065	33.9362	0.98633	0.177877
tr|Q9D0C0|Q9D0C0_MOUSE Uncharacterized protein OS=Mus musculus GN=Ctsl PE=2 SV=1;tr|Q543M3|Q543M3_MOUSE Cathepsin L OS=Mus musculus GN=Ctsl PE=1 SV=1;tr|Q3UHZ4|Q3UHZ4_MOUSE Uncharacterized protein OS=Mus musculus GN=Ctsl PE=2 SV=1;tr|Q3U5U9|Q3U5U9_MOUSE Un	27.6307	28.431	28.6918	28.6024	27.4984	28.2216	27.7932	28.1098	28.339	27.9057	0.984713	0.188574
sp|P47880|IBP6_MOUSE Insulin-like growth factor-binding protein 6 OS=Mus musculus GN=Igfbp6 PE=2 SV=2	26.7779	27.93	27.9461	28.1504	26.4025	27.6753	27.2714	27.0599	27.7011	27.1023	0.978382	0.194226
tr|Q8BNU3|Q8BNU3_MOUSE Uncharacterized protein OS=Mus musculus GN=Fmod PE=2 SV=1;tr|Q543D2|Q543D2_MOUSE Fibromodulin OS=Mus musculus GN=Fmod PE=2 SV=1;sp|P50608|FMOD_MOUSE Fibromodulin OS=Mus musculus GN=Fmod PE=2 SV=1;tr|Q7TPZ1|Q7TPZ1_MOUSE Fmod protein (	24.7653	25.2311	25.4268	25.846	25.8093	25.7074	25.8715	25.3523	25.3173	25.6851	1.01453	0.195432
sp|P05201|AATC_MOUSE Aspartate aminotransferase, cytoplasmic OS=Mus musculus GN=Got1 PE=1 SV=3	29.7201	29.4652	29.1856	29.1031	29.1437	29.3702	29.1035	28.7513	29.3685	29.0922	0.990592	0.196077
sp|P17563|SBP1_MOUSE Selenium-binding protein 1 OS=Mus musculus GN=Selenbp1 PE=1 SV=2;sp|Q63836|SBP2_MOUSE Selenium-binding protein 2 OS=Mus musculus GN=Selenbp2 PE=1 SV=2;tr|A0A0R4J135|A0A0R4J135_MOUSE Selenium-binding protein 2 OS=Mus musculus GN=Selenbp	28.0844	26.6562	26.3112	25.3517	27.7087	27.5555	27.651	26.9358	26.6009	27.4627	1.0324	0.196816
tr|A5GZX3|A5GZX3_MOUSE Lactoylglutathione lyase OS=Mus musculus GN=Glo1 PE=1 SV=1;sp|Q9CPU0|LGUL_MOUSE Lactoylglutathione lyase OS=Mus musculus GN=Glo1 PE=1 SV=3	28.048	26.931	27.0134	26.3122	27.9269	27.2708	27.8568	27.502	27.0762	27.6391	1.02079	0.200343
sp|P19157|GSTP1_MOUSE Glutathione S-transferase P 1 OS=Mus musculus GN=Gstp1 PE=1 SV=2;sp|P46425|GSTP2_MOUSE Glutathione S-transferase P 2 OS=Mus musculus GN=Gstp2 PE=1 SV=2;tr|K9JA74|K9JA74_MOUSE Glutathione S-transferase pi 2 (Fragment) OS=Mus musculus G	28.3353	28.3024	27.4468	27.6705	28.6294	28.2354	28.7699	27.859	27.9388	28.3734	1.01556	0.202863
sp|P01887|B2MG_MOUSE Beta-2-microglobulin OS=Mus musculus GN=B2m PE=1 SV=2;tr|Q9D239|Q9D239_MOUSE Beta-2-microglobulin OS=Mus musculus GN=B2m PE=2 SV=1;tr|Q3U679|Q3U679_MOUSE Beta-2-microglobulin OS=Mus musculus GN=B2m PE=2 SV=1;tr|Q91Z73|Q91Z73_MOUSE Beta	28.4268	29.1118	29.2926	29.2833	28.4079	28.81	28.8266	28.7727	29.0286	28.7043	0.988828	0.204293
sp|Q6P8J7|KCRS_MOUSE Creatine kinase S-type, mitochondrial OS=Mus musculus GN=Ckmt2 PE=1 SV=1	28.7206	27.8108	27.0508	26.632	28.4715	28.596	28.8376	27.4184	27.5536	28.3309	1.02821	0.211596
sp|P47877|IBP2_MOUSE Insulin-like growth factor-binding protein 2 OS=Mus musculus GN=Igfbp2 PE=2 SV=2;tr|Q9D057|Q9D057_MOUSE Uncharacterized protein OS=Mus musculus GN=Igfbp2 PE=2 SV=1	30.3822	31.3066	31.2363	31.4634	30.1208	31.1944	30.7143	30.5531	31.0971	30.6456	0.985482	0.219002
sp|Q9QUR8|SEM7A_MOUSE Semaphorin-7A OS=Mus musculus GN=Sema7a PE=1 SV=1	26.018	26.9189	27.1896	26.8566	25.5805	26.6576	26.2875	26.5465	26.7458	26.268	0.982138	0.221405
sp|P40142|TKT_MOUSE Transketolase OS=Mus musculus GN=Tkt PE=1 SV=1;tr|A0A286YE28|A0A286YE28_MOUSE Transketolase (Fragment) OS=Mus musculus GN=Tkt PE=4 SV=1	28.2754	26.5408	26.9228	26.1635	27.9612	27.4139	27.8559	27.2977	26.9756	27.6322	1.02434	0.227177
sp|Q99PT1|GDIR1_MOUSE Rho GDP-dissociation inhibitor 1 OS=Mus musculus GN=Arhgdia PE=1 SV=3	28.1837	27.3213	26.8112	26.6328	28.2038	27.5867	28.1975	27.1921	27.2372	27.795	1.02048	0.239094
tr|Q549A5|Q549A5_MOUSE Clusterin OS=Mus musculus GN=Clu PE=1 SV=1;sp|Q06890|CLUS_MOUSE Clusterin OS=Mus musculus GN=Clu PE=1 SV=1;tr|Q9JK98|Q9JK98_MOUSE Clusterin OS=Mus musculus GN=Clu PE=2 SV=1;tr|E9PUU2|E9PUU2_MOUSE Clusterin (Fragment) OS=Mus musculus	32.1144	32.9424	32.4617	33.282	31.8068	32.7106	32.379	32.2387	32.7001	32.2838	0.987268	0.239117
tr|Q3UFS5|Q3UFS5_MOUSE Phospholipid transfer protein OS=Mus musculus GN=Pltp PE=1 SV=1;sp|P55065|PLTP_MOUSE Phospholipid transfer protein OS=Mus musculus GN=Pltp PE=1 SV=1;tr|A2A5K2|A2A5K2_MOUSE Phospholipid transfer protein OS=Mus musculus GN=Pltp PE=1 SV	27.4542	27.9276	27.6324	28.605	27.1578	27.9612	27.4127	27.5063	27.9048	27.5095	0.985836	0.240539
sp|Q60963|PAFA_MOUSE Platelet-activating factor acetylhydrolase OS=Mus musculus GN=Pla2g7 PE=2 SV=2;tr|Q9DB74|Q9DB74_MOUSE Platelet-activating factor acetylhydrolase OS=Mus musculus GN=Pla2g7 PE=2 SV=1;tr|E9Q330|E9Q330_MOUSE Platelet-activating factor acet	27.4627	27.9599	28.2385	28.7002	27.3632	28.246	27.5553	27.5298	28.0903	27.6736	0.985165	0.24642
tr|Q3TYE5|Q3TYE5_MOUSE Limbic system-associated membrane protein OS=Mus musculus GN=Lsamp PE=1 SV=1;sp|Q8BLK3|LSAMP_MOUSE Limbic system-associated membrane protein OS=Mus musculus GN=Lsamp PE=1 SV=1;tr|A0A087WP80|A0A087WP80_MOUSE Limbic system-associated m	28.1295	28.9981	29.0796	29.4453	28.1312	28.6751	28.4314	28.821	28.9131	28.5147	0.98622	0.255496
tr|Q8K016|Q8K016_MOUSE Inter-alpha trypsin inhibitor, heavy chain 2 OS=Mus musculus GN=Itih2 PE=2 SV=1;sp|Q61703|ITIH2_MOUSE Inter-alpha-trypsin inhibitor heavy chain H2 OS=Mus musculus GN=Itih2 PE=1 SV=1;tr|G3X977|G3X977_MOUSE Inter-alpha trypsin inhibito	28.8142	28.3867	28.3223	28.437	28.5051	28.8669	28.6903	28.5776	28.49	28.66	1.00596	0.257332
tr|Q547B5|Q547B5_MOUSE Osteopontin OS=Mus musculus GN=Spp1 PE=1 SV=1;sp|P10923|OSTP_MOUSE Osteopontin OS=Mus musculus GN=Spp1 PE=1 SV=1;tr|F8WIP8|F8WIP8_MOUSE Osteopontin OS=Mus musculus GN=Spp1 PE=1 SV=1;tr|Q3UZY3|Q3UZY3_MOUSE Uncharacterized protein OS=M	29.2462	30.2389	30.1489	30.055	28.8628	30.1207	29.1364	29.7538	29.9223	29.4684	0.984832	0.261617
tr|Q5SS40|Q5SS40_MOUSE Tyrosine 3-monooxygenase/tryptophan 5-monooxygenase activation protein, epsilon polypeptide, isoform CRA_c OS=Mus musculus GN=Ywhae PE=1 SV=1;sp|P62259|1433E_MOUSE 14-3-3 protein epsilon OS=Mus musculus GN=Ywhae PE=1 SV=1;tr|Q8BPH1|Q	28.3838	27.5772	26.8159	26.7519	28.3194	27.9497	27.9939	27.3892	27.3822	27.9131	1.01939	0.261957
tr|Q3UEM7|Q3UEM7_MOUSE Uncharacterized protein OS=Mus musculus GN=Fgg PE=1 SV=1;sp|Q8VCM7|FIBG_MOUSE Fibrinogen gamma chain OS=Mus musculus GN=Fgg PE=1 SV=1;tr|Q3UER8|Q3UER8_MOUSE Fibrinogen gamma chain OS=Mus musculus GN=Fgg PE=1 SV=1	27.921	28.937	28.8604	28.6206	28.6247	28.9967	28.825	29.1603	28.5848	28.9017	1.01109	0.265732
sp|P35700|PRDX1_MOUSE Peroxiredoxin-1 OS=Mus musculus GN=Prdx1 PE=1 SV=1;tr|B1AXW5|B1AXW5_MOUSE Peroxiredoxin-1 (Fragment) OS=Mus musculus GN=Prdx1 PE=1 SV=8;tr|B1AXW6|B1AXW6_MOUSE Peroxiredoxin-1 (Fragment) OS=Mus musculus GN=Prdx1 PE=1 SV=1;tr|Q3U9J9|Q3U	29.2564	27.5903	25.981	26.6733	28.6599	28.8537	28.8781	27.1287	27.3752	28.3801	1.03671	0.268156
sp|Q61171|PRDX2_MOUSE Peroxiredoxin-2 OS=Mus musculus GN=Prdx2 PE=1 SV=3;tr|D3Z4A4|D3Z4A4_MOUSE Peroxiredoxin-2 (Fragment) OS=Mus musculus GN=Prdx2 PE=1 SV=8;tr|Q5M9N9|Q5M9N9_MOUSE Prdx2 protein OS=Mus musculus GN=Prdx2 PE=2 SV=1	31.5494	29.753	29.9467	29.2917	30.7964	30.8472	30.7248	30.5403	30.1352	30.7272	1.01964	0.277349
sp|P03977|KV3A4_MOUSE Ig kappa chain V-III region 50S10.1 OS=Mus musculus PE=1 SV=1;sp|P01656|KV3A3_MOUSE Ig kappa chain V-III region MOPC 70 OS=Mus musculus PE=1 SV=1;sp|P01654|KV3A1_MOUSE Ig kappa chain V-III region PC 2880/PC 1229 OS=Mus musculus PE=1 S	26.6071	26.897	25.7375	25.9336	26.9562	26.5202	26.184	27.2195	26.2938	26.72	1.01621	0.27822
sp|Q9CZU6|CISY_MOUSE Citrate synthase, mitochondrial OS=Mus musculus GN=Cs PE=1 SV=1;tr|Q0QEL9|Q0QEL9_MOUSE Citrate synthase (Fragment) OS=Mus musculus GN=Cs PE=2 SV=1	27.3077	26.6388	26.9256	25.6676	27.6834	27.8723	27.3156	26.1465	26.6349	27.2545	1.02326	0.280132
sp|P13634|CAH1_MOUSE Carbonic anhydrase 1 OS=Mus musculus GN=Ca1 PE=1 SV=4	31.2355	29.1861	30.2987	28.9107	30.5943	30.2529	30.6498	30.7028	29.9077	30.55	1.02147	0.282639
tr|Q543C5|Q543C5_MOUSE Osteoglycin OS=Mus musculus GN=Ogn PE=1 SV=1;sp|Q62000|MIME_MOUSE Mimecan OS=Mus musculus GN=Ogn PE=1 SV=1	26.2981	27.3711	26.5368	27.7317	27.8494	26.7986	27.9462	27.3379	26.9844	27.483	1.01848	0.290184
tr|B7ZNR0|B7ZNR0_MOUSE Ecm1 protein OS=Mus musculus GN=Ecm1 PE=2 SV=1;tr|Q9QX30|Q9QX30_MOUSE Extracellular matrix protein OS=Mus musculus PE=4 SV=1;tr|Q3TDX7|Q3TDX7_MOUSE Extracellular matrix protein 1 OS=Mus musculus GN=Ecm1 PE=2 SV=1;sp|Q61508|ECM1_MOUSE	27.1112	28.0482	27.5095	28.1095	27.1741	27.4909	27.5455	27.4213	27.6946	27.4079	0.989649	0.295918
sp|Q4V9Z5|SE6L2_MOUSE Seizure 6-like protein 2 OS=Mus musculus GN=Sez6l2 PE=1 SV=1	25.8586	26.5294	26.4113	26.1374	25.5833	26.4845	25.8312	25.9292	26.2342	25.957	0.989436	0.29594
sp|Q921I1|TRFE_MOUSE Serotransferrin OS=Mus musculus GN=Tf PE=1 SV=1;tr|E9Q035|E9Q035_MOUSE Predicted gene 20425 OS=Mus musculus GN=Gm20425 PE=4 SV=1	35.927	36.7165	36.8915	36.8536	36.0567	36.3075	36.3144	36.5688	36.5972	36.3119	0.992204	0.296376
sp|P70232|NCHL1_MOUSE Neural cell adhesion molecule L1-like protein OS=Mus musculus GN=Chl1 PE=1 SV=2	25.9119	28.3769	27.9809	28.8926	26.3197	27.5617	27.4587	26.4912	27.7905	26.9578	0.970035	0.29641
tr|Q0VGU4|Q0VGU4_MOUSE MCG18019 OS=Mus musculus GN=Vgf PE=1 SV=1	30.1657	30.5237	30.9185	31.194	30.2719	30.535	30.5445	30.3809	30.7005	30.4331	0.991291	0.297639
sp|Q9ESB3|HRG_MOUSE Histidine-rich glycoprotein OS=Mus musculus GN=Hrg PE=1 SV=2;tr|A0A0R4J039|A0A0R4J039_MOUSE Histidine-rich glycoprotein OS=Mus musculus GN=Hrg PE=1 SV=1	28.134	29.2966	29.2813	29.2253	29.1643	29.084	29.4869	29.6213	28.9843	29.3391	1.01224	0.298018
tr|Q6GT24|Q6GT24_MOUSE Peroxiredoxin-6 OS=Mus musculus GN=Prdx6 PE=1 SV=1;tr|Q53ZU7|Q53ZU7_MOUSE Peroxiredoxin 6 OS=Mus musculus GN=Prdx6 PE=2 SV=1;sp|O08709|PRDX6_MOUSE Peroxiredoxin-6 OS=Mus musculus GN=Prdx6 PE=1 SV=3;tr|Q6A0D0|Q6A0D0_MOUSE MKIAA0106 pr	28.8611	27.6653	27.9205	27.147	28.5019	28.2402	28.4299	28.1045	27.8985	28.3191	1.01508	0.299123
sp|Q01853|TERA_MOUSE Transitional endoplasmic reticulum ATPase OS=Mus musculus GN=Vcp PE=1 SV=4;tr|Q8BNF8|Q8BNF8_MOUSE Uncharacterized protein OS=Mus musculus GN=Vcp PE=2 SV=1	28.5629	27.3581	26.8548	26.791	27.8495	28.2032	27.9649	27.5037	27.3917	27.8803	1.01784	0.304791
sp|P09535|IGF2_MOUSE Insulin-like growth factor II OS=Mus musculus GN=Igf2 PE=1 SV=1;tr|D3Z4N4|D3Z4N4_MOUSE Insulin-like growth factor II (Fragment) OS=Mus musculus GN=Igf2 PE=1 SV=2	27.498	28.7611	29.1073	29.0918	27.5697	28.5763	28.2043	28.2082	28.6146	28.1396	0.983403	0.316084
sp|P11087|CO1A1_MOUSE Collagen alpha-1(I) chain OS=Mus musculus GN=Col1a1 PE=1 SV=4;tr|Q99LL6|Q99LL6_MOUSE Col1a1 protein (Fragment) OS=Mus musculus GN=Col1a1 PE=2 SV=1	28.1948	28.8224	28.8095	28.8524	29.2817	28.8432	29.0658	28.4898	28.6698	28.9201	1.00873	0.32161
tr|Q3UST4|Q3UST4_MOUSE Uncharacterized protein (Fragment) OS=Mus musculus GN=Nptx1 PE=2 SV=1;tr|A2ACL9|A2ACL9_MOUSE Neuronal pentraxin 1 OS=Mus musculus GN=Nptx1 PE=1 SV=1;sp|Q62443|NPTX1_MOUSE Neuronal pentraxin-1 OS=Mus musculus GN=Nptx1 PE=1 SV=1	27.0572	28.2234	28.1027	28.1095	27.3103	27.8126	27.3444	27.7309	27.8732	27.5495	0.988388	0.325845
tr|Q9DBH3|Q9DBH3_MOUSE Uncharacterized protein OS=Mus musculus GN=Gpld1 PE=2 SV=1;tr|Q8VCU2|Q8VCU2_MOUSE Glycosylphosphatidylinositol specific phospholipase D1 OS=Mus musculus GN=Gpld1 PE=1 SV=1;tr|Q8R432|Q8R432_MOUSE Glycosylphosphatidylinositol phospholi	26.3155	26.5196	26.2353	26.5605	25.7155	26.4091	26.2184	26.4785	26.4077	26.2054	0.992338	0.326396
tr|Q5EBJ0|Q5EBJ0_MOUSE Fatty acid binding protein 3, muscle and heart OS=Mus musculus GN=Fabp3 PE=1 SV=1;sp|P11404|FABPH_MOUSE Fatty acid-binding protein, heart OS=Mus musculus GN=Fabp3 PE=1 SV=5	31.7101	30.9352	30.2346	29.8966	31.2447	31.3916	31.4349	30.6043	30.6941	31.1689	1.01547	0.327611
sp|Q61838|PZP_MOUSE Pregnancy zone protein OS=Mus musculus GN=Pzp PE=1 SV=3	33.5959	32.4389	32.5789	31.86	32.741	32.9915	32.9498	33.4437	32.6184	33.0315	1.01266	0.330534
tr|Q3TF08|Q3TF08_MOUSE Uncharacterized protein (Fragment) OS=Mus musculus GN=Rbp4 PE=2 SV=1;sp|Q00724|RET4_MOUSE Retinol-binding protein 4 OS=Mus musculus GN=Rbp4 PE=1 SV=2;tr|H7BWY6|H7BWY6_MOUSE Retinol-binding protein 4 OS=Mus musculus GN=Rbp4 PE=1 SV=1	28.7609	29.6352	29.425	29.8667	28.5178	28.886	29.2207	29.6391	29.422	29.0659	0.987898	0.331826
tr|G3X8T9|G3X8T9_MOUSE Serine (Or cysteine) peptidase inhibitor, clade A, member 3N, isoform CRA_a OS=Mus musculus GN=Serpina3n PE=1 SV=1	27.2856	27.6011	27.7821	27.6705	27.5245	27.5994	27.3921	27.2879	27.5848	27.451	0.995147	0.332438
tr|Q5M9K1|Q5M9K1_MOUSE Transthyretin OS=Mus musculus GN=Ttr PE=1 SV=1;sp|P07309|TTHY_MOUSE Transthyretin OS=Mus musculus GN=Ttr PE=1 SV=1;tr|Q9D6A4|Q9D6A4_MOUSE Transthyretin OS=Mus musculus GN=Ttr PE=2 SV=1	32.5787	34.2514	34.2667	34.4176	33.1281	33.4039	33.3907	33.7171	33.8786	33.41	0.986167	0.339085
sp|P11589|MUP2_MOUSE Major urinary protein 2 OS=Mus musculus GN=Mup2 PE=1 SV=1;tr|Q8JZT0|Q8JZT0_MOUSE Mup1 protein OS=Mus musculus PE=2 SV=1	29.7602	31.7886	31.3687	31.4559	29.3957	28.6432	30.909	31.8766	31.0934	30.2061	0.971464	0.341403
sp|O88968|TCO2_MOUSE Transcobalamin-2 OS=Mus musculus GN=Tcn2 PE=1 SV=1	25.5482	26.0504	26.4102	26.6296	25.8491	26.2397	25.6561	25.789	26.1596	25.8835	0.989444	0.341587
tr|Q8BSI9|Q8BSI9_MOUSE Uncharacterized protein OS=Mus musculus GN=Cdh2 PE=2 SV=1;tr|Q3UIC2|Q3UIC2_MOUSE Uncharacterized protein OS=Mus musculus GN=Cdh2 PE=2 SV=1;sp|P15116|CADH2_MOUSE Cadherin-2 OS=Mus musculus GN=Cdh2 PE=1 SV=2;tr|D3YYT0|D3YYT0_MOUSE Cadh	28.4784	30.1248	29.6936	29.9933	28.8056	29.5616	29.1916	29.0578	29.5726	29.1542	0.985852	0.344064
tr|A5JUZ1|A5JUZ1_MOUSE Ubiqutin subunit 1 (Fragment) OS=Mus musculus GN=Ubc PE=2 SV=1;tr|A0A0A6YW67|A0A0A6YW67_MOUSE MCG23377, isoform CRA_b OS=Mus musculus GN=Gm8797 PE=4 SV=1;tr|E9Q9J0|E9Q9J0_MOUSE Ubiquitin-60S ribosomal protein L40 (Fragment) OS=Mus mu	29.4845	29.8471	30.0999	29.8948	30.2012	30.0384	29.9958	29.7391	29.8316	29.9936	1.00543	0.349828
tr|A0A0R4J0I1|A0A0R4J0I1_MOUSE MCG1051009 OS=Mus musculus GN=Serpina3k PE=1 SV=1	33.2498	34.212	33.3514	34.1779	32.2313	32.6704	33.8584	34.1313	33.7478	33.2229	0.984445	0.357035
sp|Q5SX39|MYH4_MOUSE Myosin-4 OS=Mus musculus GN=Myh4 PE=2 SV=1	27.2562	26.282	26.1117	25.1318	27.0199	28.4046	27.7572	24.9759	26.1954	27.0394	1.03222	0.365145
tr|Q58E61|Q58E61_MOUSE Igh protein OS=Mus musculus GN=Igh PE=2 SV=1;tr|Q4VAB6|Q4VAB6_MOUSE Igh protein OS=Mus musculus GN=Igh PE=2 SV=1	28.1349	26.678	28.6025	26.5859	25.8946	26.4345	27.242	27.8272	27.5003	26.8496	0.976336	0.366292
tr|Q3UBS3|Q3UBS3_MOUSE Haptoglobin OS=Mus musculus GN=Hp PE=1 SV=1;sp|Q61646|HPT_MOUSE Haptoglobin OS=Mus musculus GN=Hp PE=1 SV=1	28.5831	26.8634	30.8619	28.5424	31.5601	27.2364	29.9035	31.0753	28.7127	29.9438	1.04288	0.369255
tr|A0A0R4J038|A0A0R4J038_MOUSE Kininogen-1 OS=Mus musculus GN=Kng1 PE=1 SV=1;sp|O08677|KNG1_MOUSE Kininogen-1 OS=Mus musculus GN=Kng1 PE=1 SV=1;tr|D3YTY9|D3YTY9_MOUSE Kininogen-1 OS=Mus musculus GN=Kng1 PE=1 SV=1	31.769	32.3344	32.0227	32.3357	32.1542	32.0104	32.4062	32.6496	32.1155	32.3051	1.0059	0.371883
sp|P21614|VTDB_MOUSE Vitamin D-binding protein OS=Mus musculus GN=Gc PE=1 SV=2	32.6831	33.4529	33.1276	33.3159	32.6619	32.5182	33.1633	33.2759	33.1449	32.9048	0.992758	0.374238
sp|E9PV24|FIBA_MOUSE Fibrinogen alpha chain OS=Mus musculus GN=Fga PE=1 SV=1	28.299	29.058	29.0613	28.781	28.9321	28.9899	28.8463	29.1444	28.7998	28.9782	1.00619	0.384312
tr|Q545T7|Q545T7_MOUSE MCG121569, isoform CRA_a OS=Mus musculus GN=Myl1 PE=2 SV=1;sp|P05977|MYL1_MOUSE Myosin light chain 1/3, skeletal muscle isoform OS=Mus musculus GN=Myl1 PE=1 SV=2;tr|Q545G5|Q545G5_MOUSE MCG121569, isoform CRA_b OS=Mus musculus GN=Myl1	28.4604	27.2522	26.8313	26.1454	27.9052	28.3677	28.1031	26.6181	27.1724	27.7485	1.0212	0.390274
tr|Q3TT51|Q3TT51_MOUSE Secretogranin V, isoform CRA_b OS=Mus musculus GN=Scg5 PE=1 SV=1;sp|P12961|7B2_MOUSE Neuroendocrine protein 7B2 OS=Mus musculus GN=Scg5 PE=1 SV=1	28.7445	29.8981	30.0172	30.4367	29.0998	29.8577	29.3946	29.2886	29.7741	29.4102	0.987778	0.39397
tr|A8IP69|A8IP69_MOUSE 14-3-3 protein gamma subtype OS=Mus musculus GN=Ywhag PE=1 SV=1;sp|P61982|1433G_MOUSE 14-3-3 protein gamma OS=Mus musculus GN=Ywhag PE=1 SV=2	29.737	28.8311	28.2126	27.9757	29.6032	29.098	29.288	28.446	28.6891	29.1088	1.01463	0.399414
tr|A0A1L1SUX8|A0A1L1SUX8_MOUSE Thy-1 membrane glycoprotein (Fragment) OS=Mus musculus GN=Thy1 PE=1 SV=1;tr|Q53YX2|Q53YX2_MOUSE CD90.1 OS=Mus musculus GN=Thy1 PE=2 SV=1;sp|P01831|THY1_MOUSE Thy-1 membrane glycoprotein OS=Mus musculus GN=Thy1 PE=1 SV=1	28.3602	29.1721	29.1263	28.8995	28.7479	29.1857	29.263	29.1522	28.8895	29.0872	1.00684	0.401756
tr|Q5EBQ2|Q5EBQ2_MOUSE MCG7941, isoform CRA_f OS=Mus musculus GN=Pebp1 PE=1 SV=1;tr|Q3TGC5|Q3TGC5_MOUSE Uncharacterized protein OS=Mus musculus GN=Pebp1 PE=2 SV=1;sp|P70296|PEBP1_MOUSE Phosphatidylethanolamine-binding protein 1 OS=Mus musculus GN=Pebp1 PE=	30.4726	29.6976	29.4183	29.3596	30.2751	29.7876	30.1801	29.7399	29.737	29.9957	1.0087	0.406348
tr|Q546G4|Q546G4_MOUSE Albumin 1 OS=Mus musculus GN=Alb PE=1 SV=1;sp|P07724|ALBU_MOUSE Serum albumin OS=Mus musculus GN=Alb PE=1 SV=3	38.5621	39.1128	39.1036	39.2997	38.5964	38.508	38.927	39.2334	39.0196	38.8162	0.994789	0.410074
sp|Q61361|PGCB_MOUSE Brevican core protein OS=Mus musculus GN=Bcan PE=1 SV=2	27.2869	28.5794	28.7414	29.2756	27.8895	28.3078	27.9916	28.1699	28.4708	28.0897	0.986614	0.411487
sp|P11352|GPX1_MOUSE Glutathione peroxidase 1 OS=Mus musculus GN=Gpx1 PE=1 SV=2;tr|A0A0A6YVV2|A0A0A6YVV2_MOUSE Glutathione peroxidase OS=Mus musculus GN=Gpx1 PE=1 SV=1;tr|A0A0A6YY34|A0A0A6YY34_MOUSE Glutathione peroxidase OS=Mus musculus GN=Gpx1 PE=1 SV=1	28.9572	26.0329	27.3896	25.8363	27.6442	28.0055	27.7578	27.396	27.054	27.7009	1.02391	0.41164
sp|Q99M71|EPDR1_MOUSE Mammalian ependymin-related protein 1 OS=Mus musculus GN=Epdr1 PE=1 SV=1	26.3028	27.0537	27.0891	26.9116	26.4693	26.8848	26.6835	26.6115	26.8393	26.6623	0.993404	0.415209
tr|Q6ZWX2|Q6ZWX2_MOUSE Thymosin, beta 4, X chromosome OS=Mus musculus GN=Tmsb4x PE=2 SV=1;sp|P20065|TYB4_MOUSE Thymosin beta-4 OS=Mus musculus GN=Tmsb4x PE=1 SV=1	29.8373	28.7449	28.772	28.4221	29.5508	29.0117	29.5004	28.9234	28.9441	29.2466	1.01045	0.418523
sp|P22005|PENK_MOUSE Proenkephalin-A OS=Mus musculus GN=Penk PE=1 SV=2;tr|Q3UXY8|Q3UXY8_MOUSE Uncharacterized protein (Fragment) OS=Mus musculus GN=Penk PE=2 SV=1;tr|B1AZQ0|B1AZQ0_MOUSE Proenkephalin-A (Fragment) OS=Mus musculus GN=Penk PE=1 SV=1	29.2953	29.6547	30.1714	30.3421	29.4497	29.8153	29.7446	29.5875	29.8659	29.6493	0.992748	0.425504
sp|P23953|EST1C_MOUSE Carboxylesterase 1C OS=Mus musculus GN=Ces1c PE=1 SV=4	32.5487	32.5736	32.4884	32.6148	32.3166	32.3047	32.5292	32.7286	32.5564	32.4698	0.99734	0.436511
sp|Q9DBD0|ICA_MOUSE Inhibitor of carbonic anhydrase OS=Mus musculus GN=Ica PE=1 SV=1;tr|Q8VC96|Q8VC96_MOUSE Uncharacterized protein OS=Mus musculus GN=1300017J02Rik PE=2 SV=1;tr|D3YY36|D3YY36_MOUSE RIKEN cDNA 1300017J02 gene OS=Mus musculus GN=1300017J02Ri	29.1736	29.7318	29.7254	29.464	28.9194	29.1303	29.4473	29.8174	29.5237	29.3286	0.993393	0.440662
sp|P06728|APOA4_MOUSE Apolipoprotein A-IV OS=Mus musculus GN=Apoa4 PE=1 SV=3;tr|Q9DBN0|Q9DBN0_MOUSE Uncharacterized protein OS=Mus musculus GN=Apoa4 PE=2 SV=1;tr|Q810I7|Q810I7_MOUSE Apoa4 protein OS=Mus musculus GN=Apoa4 PE=2 SV=1;tr|Q01488|Q01488_MUSMC Ap	31.2636	31.6548	31.2991	31.6288	31.3588	31.3968	31.9983	31.6809	31.4616	31.6087	1.00468	0.448535
tr|A8DUL0|A8DUL0_MOUSE Beta-globin OS=Mus musculus GN=Hbbt1 PE=3 SV=1	38.1452	36.2608	37.0873	36.0118	37.5574	36.9399	37.3663	37.2394	36.8763	37.2758	1.01083	0.453501
tr|Q542X9|Q542X9_MOUSE Superoxide dismutase [Cu-Zn] OS=Mus musculus GN=Sod3 PE=1 SV=1;tr|O88592|O88592_MOUSE Superoxide dismutase [Cu-Zn] OS=Mus musculus GN=Sod3 PE=2 SV=1;sp|O09164|SODE_MOUSE Extracellular superoxide dismutase [Cu-Zn] OS=Mus musculus GN=S	27.1446	27.6976	27.4539	27.5113	27.3084	27.6037	27.3773	26.9487	27.4518	27.3095	0.994817	0.454247
tr|Q8C6E3|Q8C6E3_MOUSE Catalase OS=Mus musculus GN=Cat PE=2 SV=1;sp|P24270|CATA_MOUSE Catalase OS=Mus musculus GN=Cat PE=1 SV=4;tr|Q3UZE7|Q3UZE7_MOUSE Catalase OS=Mus musculus GN=Cat PE=2 SV=1;tr|Q3UF58|Q3UF58_MOUSE Catalase OS=Mus musculus GN=Cat PE=2 SV=	29.4681	26.9399	27.7514	25.6112	27.7915	28.2776	28.2452	28.0362	27.4426	28.0876	1.0235	0.458469
sp|Q91X72|HEMO_MOUSE Hemopexin OS=Mus musculus GN=Hpx PE=1 SV=2;tr|Q8K1U6|Q8K1U6_MOUSE Hemopexin (Fragment) OS=Mus musculus PE=4 SV=1	33.3092	33.5124	34.0763	33.6696	33.9309	33.4839	33.6399	34.246	33.6419	33.8252	1.00545	0.462888
tr|Q5F1Z8|Q5F1Z8_MOUSE GM2 ganglioside activator protein OS=Mus musculus GN=Gm2a PE=1 SV=1;sp|Q60648|SAP3_MOUSE Ganglioside GM2 activator OS=Mus musculus GN=Gm2a PE=1 SV=2	28.3983	28.9417	28.7265	29.4092	28.3311	29.0741	28.7572	28.4797	28.8689	28.6605	0.992781	0.465966
tr|Q571D4|Q571D4_MOUSE MKIAA0387 protein (Fragment) OS=Mus musculus GN=Ptprn2 PE=2 SV=1;tr|Q3UU93|Q3UU93_MOUSE Receptor-type tyrosine-protein phosphatase N2 OS=Mus musculus GN=Ptprn2 PE=1 SV=1;tr|A3KN68|A3KN68_MOUSE Protein tyrosine phosphatase, receptor t	26.643	27.8541	27.751	28.0613	27.0691	27.7514	27.2644	27.1233	27.5774	27.302	0.990016	0.466215
sp|B5X0G2|MUP17_MOUSE Major urinary protein 17 OS=Mus musculus GN=Mup17 PE=2 SV=2;tr|A2CEK6|A2CEK6_MOUSE Major urinary protein 11 OS=Mus musculus GN=Mup13 PE=3 SV=1;tr|L7N222|L7N222_MOUSE Major urinary protein 13 OS=Mus musculus GN=Mup13 PE=3 SV=1;tr|B0V38	28.1505	29.7586	28.8741	29.2879	27.4804	26.8686	29.3149	29.9302	29.0178	28.3985	0.978658	0.470559
sp|P15327|PMGE_MOUSE Bisphosphoglycerate mutase OS=Mus musculus GN=Bpgm PE=1 SV=2;tr|Q3TAQ8|Q3TAQ8_MOUSE Phosphoglycerate mutase OS=Mus musculus GN=Bpgm PE=2 SV=1;tr|D3Z223|D3Z223_MOUSE Phosphoglycerate mutase (Fragment) OS=Mus musculus GN=Bpgm PE=1 SV=1	29.7965	27.6533	28.0144	26.3585	28.721	28.6369	28.7309	27.9277	27.9557	28.5041	1.01962	0.483759
tr|Q6S9I0|Q6S9I0_MOUSE Kininogen 2 OS=Mus musculus GN=Kng2 PE=1 SV=1;tr|Q6S9I2|Q6S9I2_MOUSE HMW-kininogen-II variant OS=Mus musculus GN=Kng2 PE=1 SV=1;tr|Q6S9I3|Q6S9I3_MOUSE HMW kininogen-II OS=Mus musculus GN=Kng2 PE=1 SV=1;tr|Q6DMP4|Q6DMP4_MOUSE High mol	29.4586	29.9266	29.7176	29.3965	30.0234	29.2694	29.9088	29.9282	29.6248	29.7825	1.00532	0.484708
tr|Q3TGR2|Q3TGR2_MOUSE Fibrinogen, B beta polypeptide, isoform CRA_a OS=Mus musculus GN=Fgb PE=1 SV=1;sp|Q8K0E8|FIBB_MOUSE Fibrinogen beta chain OS=Mus musculus GN=Fgb PE=1 SV=1	27.9148	28.8353	28.7671	28.4898	28.5208	28.615	28.7258	28.794	28.5017	28.6639	1.00569	0.484986
tr|Q7M754|Q7M754_MOUSE Try10-like trypsinogen OS=Mus musculus GN=Gm5409 PE=2 SV=1;tr|Q792Z1|Q792Z1_MOUSE MCG140784 OS=Mus musculus GN=Try10 PE=1 SV=1	28.3306	29.8912	29.7257	30.0926	28.9389	29.2877	29.2015	29.4126	29.51	29.2102	0.98984	0.494794
tr|Q8BPF4|Q8BPF4_MOUSE Uncharacterized protein OS=Mus musculus PE=2 SV=1;tr|Q9QWJ3|Q9QWJ3_MOUSE Alpha-1-globin (Fragment) OS=Mus musculus PE=2 SV=1	37.4379	35.846	36.7364	35.5341	36.9003	36.4626	36.683	36.7791	36.3886	36.7063	1.00873	0.499761
tr|Q91XL1|Q91XL1_MOUSE Leucine-rich HEV glycoprotein OS=Mus musculus GN=Lrg1 PE=1 SV=1	27.2946	27.9604	28.6144	28.0042	28.7513	27.4503	28.1195	28.7201	27.9684	28.2603	1.01044	0.501536
sp|P08228|SODC_MOUSE Superoxide dismutase [Cu-Zn] OS=Mus musculus GN=Sod1 PE=1 SV=2	31.9517	30.6946	31.1081	30.7045	31.1541	30.7506	30.9551	30.7087	31.1148	30.8921	0.992844	0.502868
tr|A8DUQ1|A8DUQ1_MOUSE Beta-globin OS=Mus musculus GN=Hbbt1 PE=3 SV=1	35.3715	33.1819	33.9136	32.9901	34.3087	33.9525	34.5886	34.1498	33.8643	34.2499	1.01139	0.514489
sp|Q03517|SCG2_MOUSE Secretogranin-2 OS=Mus musculus GN=Scg2 PE=1 SV=1;tr|Q4W8U9|Q4W8U9_MOUSE Scg2 protein OS=Mus musculus GN=Scg2 PE=1 SV=1	29.3198	29.8872	30.505	30.7266	29.5134	30.3162	29.8377	29.7791	30.1096	29.8616	0.991763	0.515335
sp|Q5SX40|MYH1_MOUSE Myosin-1 OS=Mus musculus GN=Myh1 PE=1 SV=1;tr|B2RWX0|B2RWX0_MOUSE Myosin, heavy polypeptide 1, skeletal muscle, adult OS=Mus musculus GN=Myh1 PE=2 SV=1	29.9285	27.632	27.5847	24.715	29.4166	30.7578	29.4677	24.8352	27.4651	28.6193	1.04203	0.518019
sp|Q9DBB9|CPN2_MOUSE Carboxypeptidase N subunit 2 OS=Mus musculus GN=Cpn2 PE=1 SV=2;tr|Q642I5|Q642I5_MOUSE Cpn2 protein (Fragment) OS=Mus musculus GN=Cpn2 PE=2 SV=1	26.2949	25.7099	26.133	25.6353	26.0856	26.1613	25.6529	26.5332	25.9433	26.1083	1.00636	0.520007
sp|Q9EPL2|CSTN1_MOUSE Calsyntenin-1 OS=Mus musculus GN=Clstn1 PE=1 SV=1	25.9264	28.3541	28.4114	28.8614	26.8169	27.852	27.3293	27.6727	27.8884	27.4177	0.983124	0.527375
tr|Q3UEL3|Q3UEL3_MOUSE Uncharacterized protein OS=Mus musculus GN=Il1rap PE=2 SV=1;sp|Q61730|IL1AP_MOUSE Interleukin-1 receptor accessory protein OS=Mus musculus GN=Il1rap PE=1 SV=1;tr|E9Q6I2|E9Q6I2_MOUSE Interleukin-1 receptor accessory protein OS=Mus mus	26.517	27.4934	27.121	27.2604	26.1648	26.7924	27.1539	27.384	27.098	26.8738	0.991727	0.531523
sp|Q9DAK9|PHP14_MOUSE 14 kDa phosphohistidine phosphatase OS=Mus musculus GN=Phpt1 PE=1 SV=1	27.8309	26.5735	26.0313	26.2051	27.2996	26.5863	27.3345	26.6029	26.6602	26.9558	1.01109	0.541464
sp|Q9R1E6|ENPP2_MOUSE Ectonucleotide pyrophosphatase/phosphodiesterase family member 2 OS=Mus musculus GN=Enpp2 PE=1 SV=3;tr|G3UXY9|G3UXY9_MOUSE Ectonucleotide pyrophosphatase/phosphodiesterase family member 2 OS=Mus musculus GN=Enpp2 PE=1 SV=1	33.3227	34.4526	34.5789	34.5602	33.696	34.0985	34.0922	34.1974	34.2286	34.021	0.993936	0.544131
tr|Q91WQ0|Q91WQ0_MOUSE Serine (Or cysteine) peptidase inhibitor, clade A, member 6 OS=Mus musculus GN=Serpina6 PE=2 SV=1;sp|Q06770|CBG_MOUSE Corticosteroid-binding globulin OS=Mus musculus GN=Serpina6 PE=1 SV=1;tr|Q3UKW1|Q3UKW1_MOUSE Uncharacterized protei	29.175	28.6621	28.9615	28.7536	28.9545	28.9161	28.9895	28.989	28.8881	28.9623	1.00257	0.544749
tr|A0A0R4J0X5|A0A0R4J0X5_MOUSE Alpha-1-antitrypsin 1-3 OS=Mus musculus GN=Serpina1c PE=1 SV=1	32.5799	32.3232	32.1415	32.2732	31.7196	31.7143	32.5054	32.6842	32.3294	32.1559	0.994631	0.546967
tr|Q5NCU4|Q5NCU4_MOUSE SPARC OS=Mus musculus GN=Sparc PE=1 SV=1;tr|Q5NCU5|Q5NCU5_MOUSE Sparc protein OS=Mus musculus GN=Sparc PE=1 SV=1;sp|P07214|SPRC_MOUSE SPARC OS=Mus musculus GN=Sparc PE=1 SV=1;tr|A0A1L1SSH9|A0A1L1SSH9_MOUSE SPARC OS=Mus musculus GN=Sp	26.6348	27.6764	27.5949	27.959	27.095	27.6293	27.1374	27.2286	27.4663	27.2726	0.992947	0.558433
tr|D2KHZ9|D2KHZ9_MOUSE Glyceraldehyde-3-phosphate dehydrogenase OS=Mus musculus GN=GAPDH PE=2 SV=1;sp|P16858|G3P_MOUSE Glyceraldehyde-3-phosphate dehydrogenase OS=Mus musculus GN=Gapdh PE=1 SV=2;tr|A0A0A0MQF6|A0A0A0MQF6_MOUSE Glyceraldehyde-3-phosphate deh	32.8966	32.4489	31.1859	31.4438	32.5219	32.8046	32.6531	31.3073	31.9938	32.3217	1.01025	0.559909
sp|Q8BPB5|FBLN3_MOUSE EGF-containing fibulin-like extracellular matrix protein 1 OS=Mus musculus GN=Efemp1 PE=1 SV=1;tr|Q8K0J4|Q8K0J4_MOUSE Epidermal growth factor-containing fibulin-like extracellular matrix protein 1 OS=Mus musculus GN=Efemp1 PE=2 SV=1	24.9378	28.4619	27.6052	28.8007	26.0633	27.4863	27.3383	26.6319	27.4514	26.88	0.979183	0.563487
tr|A0A1C7CYU3|A0A1C7CYU3_MOUSE Nucleobindin 1, isoform CRA_b OS=Mus musculus GN=Nucb1 PE=1 SV=1;sp|Q02819|NUCB1_MOUSE Nucleobindin-1 OS=Mus musculus GN=Nucb1 PE=1 SV=2;tr|Q8BRD3|Q8BRD3_MOUSE Uncharacterized protein OS=Mus musculus GN=Nucb1 PE=2 SV=1;tr|Q3T	26.6741	27.0616	27.3733	27.1722	27.6581	26.7827	26.741	27.9122	27.0703	27.2735	1.00751	0.565323
sp|Q01339|APOH_MOUSE Beta-2-glycoprotein 1 OS=Mus musculus GN=Apoh PE=1 SV=1;tr|Q6LAL7|Q6LAL7_MOUSE Beta-2 glycoprotein I (Fragment) OS=Mus musculus PE=4 SV=1;tr|Q9CY42|Q9CY42_MOUSE Uncharacterized protein OS=Mus musculus GN=Apoh PE=2 SV=1	29.562	30.5178	29.8447	30.4394	29.1166	29.8372	30.2173	30.3327	30.0909	29.8759	0.992855	0.57122
sp|Q99LX0|PARK7_MOUSE Protein/nucleic acid deglycase DJ-1 OS=Mus musculus GN=Park7 PE=1 SV=1;tr|A2A813|A2A813_MOUSE Protein/nucleic acid deglycase DJ-1 OS=Mus musculus GN=Park7 PE=1 SV=1;tr|A2A815|A2A815_MOUSE Protein/nucleic acid deglycase DJ-1 (Fragment)	29.6526	28.0335	26.9989	27.2337	28.6213	28.1437	29.0472	27.6392	27.9797	28.3628	1.01369	0.589528
tr|B8JJN0|B8JJN0_MOUSE Predicted gene 20547 OS=Mus musculus GN=Gm20547 PE=3 SV=1;tr|F6VQX8|F6VQX8_MOUSE Predicted gene 20547 (Fragment) OS=Mus musculus GN=Gm20547 PE=3 SV=1;tr|Q3UEG8|Q3UEG8_MOUSE Complement factor B, isoform CRA_a OS=Mus musculus GN=Cfb PE	29.1974	30.0671	30.061	29.795	29.529	29.3009	29.6006	30.0967	29.7801	29.6318	0.99502	0.59502
tr|Q545F0|Q545F0_MOUSE MCG3124, isoform CRA_b OS=Mus musculus GN=Mif PE=1 SV=1;sp|P34884|MIF_MOUSE Macrophage migration inhibitory factor OS=Mus musculus GN=Mif PE=1 SV=2	28.1855	26.8105	26.7796	26.5556	27.609	27.1686	27.9036	26.6769	27.0828	27.3396	1.00948	0.595489
tr|Q544M1|Q544M1_MOUSE Lymphocyte antigen 6 complex, locus H, isoform CRA_a OS=Mus musculus GN=Ly6h PE=1 SV=1;sp|Q9WUC3|LY6H_MOUSE Lymphocyte antigen 6H OS=Mus musculus GN=Ly6h PE=1 SV=2;tr|Q8K356|Q8K356_MOUSE Lymphocyte antigen 6 complex, locus H OS=Mus m	27.7909	28.7753	28.5904	29.1666	27.8791	28.8106	28.5205	28.3495	28.5808	28.3899	0.993322	0.604174
tr|Q3UVB1|Q3UVB1_MOUSE Myoglobin OS=Mus musculus GN=Mb PE=1 SV=1;sp|P04247|MYG_MOUSE Myoglobin OS=Mus musculus GN=Mb PE=1 SV=3	34.1844	33.3754	33.0328	32.8598	33.9348	33.465	33.9659	32.9187	33.3631	33.5711	1.00624	0.606788
sp|P28665|MUG1_MOUSE Murinoglobulin-1 OS=Mus musculus GN=Mug1 PE=1 SV=3	31.1357	31.3785	30.8156	31.1041	29.9669	30.711	31.3457	31.5895	31.1085	30.9033	0.993404	0.609367
tr|Q56A15|Q56A15_MOUSE Cytochrome c OS=Mus musculus GN=Cycs PE=1 SV=1;sp|P62897|CYC_MOUSE Cytochrome c, somatic OS=Mus musculus GN=Cycs PE=1 SV=2	27.8899	27.7138	27.8588	27.5619	27.9079	27.2327	27.8865	27.6228	27.7561	27.6625	0.996626	0.610407
sp|P70274|SEPP1_MOUSE Selenoprotein P OS=Mus musculus GN=Selenop PE=1 SV=3;tr|E0CZC5|E0CZC5_MOUSE Selenoprotein P (Fragment) OS=Mus musculus GN=Selenop PE=1 SV=1;tr|E0CX80|E0CX80_MOUSE Selenoprotein P (Fragment) OS=Mus musculus GN=Selenop PE=1 SV=1	26.5212	26.0229	25.771	26.2707	26.2347	25.5475	26.2543	26.0611	26.1465	26.0244	0.995331	0.615478
tr|A0A075B5P3|A0A075B5P3_MOUSE Immunoglobulin heavy constant gamma 2B (Fragment) OS=Mus musculus GN=Ighg2b PE=1 SV=1;tr|A0A0A6YVP0|A0A0A6YVP0_MOUSE Immunoglobulin heavy constant gamma 2B (Fragment) OS=Mus musculus GN=Ighg2b PE=1 SV=2;tr|A0A0F7R1P3|A0A0F7R1	32.2711	30.704	31.0727	30.9822	31.6077	31.5627	31.0185	31.6353	31.2575	31.4561	1.00635	0.61692
tr|Q3U6G1|Q3U6G1_MOUSE Biliverdin reductase B (Flavin reductase (NADPH)) OS=Mus musculus GN=Blvrb PE=1 SV=1;sp|Q923D2|BLVRB_MOUSE Flavin reductase (NADPH) OS=Mus musculus GN=Blvrb PE=1 SV=3;tr|E9PZC3|E9PZC3_MOUSE Flavin reductase (NADPH) OS=Mus musculus GN	30.5115	28.2632	28.6399	28.2762	29.4452	28.672	29.5112	29.2521	28.9227	29.2201	1.01028	0.620265
sp|P00920|CAH2_MOUSE Carbonic anhydrase 2 OS=Mus musculus GN=Ca2 PE=1 SV=4	32.6406	30.6157	31.5492	30.5747	31.7039	31.2205	31.6735	31.826	31.345	31.606	1.00832	0.623629
tr|Q8CFZ6|Q8CFZ6_MOUSE C-type lectin domain family 3, member b OS=Mus musculus GN=Clec3b PE=1 SV=1;sp|P43025|TETN_MOUSE Tetranectin OS=Mus musculus GN=Clec3b PE=1 SV=2	26.2266	27.7296	27.0923	27.6194	27.2875	27.2058	27.459	27.4187	27.167	27.3428	1.00647	0.631403
sp|P07758|A1AT1_MOUSE Alpha-1-antitrypsin 1-1 OS=Mus musculus GN=Serpina1a PE=1 SV=4;tr|A0A0A0MQA3|A0A0A0MQA3_MOUSE Alpha-1-antitrypsin 1-1 OS=Mus musculus GN=Serpina1a PE=1 SV=1	27.2388	25.9844	27.1256	27.3168	26.0764	26.2385	27.3713	27.0983	26.9164	26.6961	0.991815	0.638964
tr|Q9D1R6|Q9D1R6_MOUSE Uncharacterized protein OS=Mus musculus GN=Tpm2 PE=2 SV=1;sp|P58774|TPM2_MOUSE Tropomyosin beta chain OS=Mus musculus GN=Tpm2 PE=1 SV=1;tr|Q61344|Q61344_MOUSE Beta-tropomyosin OS=Mus musculus GN=Tpm2 PE=2 SV=1;tr|A2AIM4|A2AIM4_MOUSE	27.9041	26.1475	26.6278	25.0898	26.5615	27.5402	27.115	25.8721	26.4423	26.7722	1.01248	0.647701
sp|P09411|PGK1_MOUSE Phosphoglycerate kinase 1 OS=Mus musculus GN=Pgk1 PE=1 SV=4;tr|S4R2M7|S4R2M7_MOUSE Phosphoglycerate kinase OS=Mus musculus GN=Pgk1 PE=1 SV=1	31.4465	30.5858	30.4362	29.995	31.0348	30.5961	31.1066	30.3666	30.6158	30.776	1.00523	0.664865
sp|Q00898|A1AT5_MOUSE Alpha-1-antitrypsin 1-5 OS=Mus musculus GN=Serpina1e PE=1 SV=1	28.6633	29.9143	29.1948	30.6299	28.03	29.5086	30.9041	31.5301	29.6006	29.9932	1.01326	0.674186
sp|P16125|LDHB_MOUSE L-lactate dehydrogenase B chain OS=Mus musculus GN=Ldhb PE=1 SV=2;tr|D3Z7F0|D3Z7F0_MOUSE L-lactate dehydrogenase (Fragment) OS=Mus musculus GN=Ldhb PE=1 SV=1	29.1908	28.5949	27.9485	27.7362	28.9273	28.6801	28.5086	28.023	28.3676	28.5347	1.00589	0.676205
tr|A0A075B5P6|A0A075B5P6_MOUSE Ig mu chain C region (Fragment) OS=Mus musculus GN=Ighm PE=1 SV=1;sp|P01872|IGHM_MOUSE Ig mu chain C region OS=Mus musculus GN=Ighm PE=1 SV=2;tr|A0A075B6A0|A0A075B6A0_MOUSE Ig mu chain C region (Fragment) OS=Mus musculus GN=I	32.4842	32.4687	30.6963	32.0169	31.918	33.1329	31.5717	31.986	31.9165	32.1521	1.00738	0.678208
tr|Q7M084|Q7M084_MOUSE Kininogen, LMW (Fragment) OS=Mus musculus PE=1 SV=1	25.9378	26.9762	26.5879	27.1167	26.5783	25.9279	26.5459	26.9776	26.6547	26.5074	0.994476	0.681299
tr|Q8CB17|Q8CB17_MOUSE Uncharacterized protein OS=Mus musculus GN=Fetub PE=2 SV=1;sp|Q9QXC1|FETUB_MOUSE Fetuin-B OS=Mus musculus GN=Fetub PE=1 SV=1;tr|Q6YJU2|Q6YJU2_MOUSE GUGU alpha OS=Mus musculus GN=Fetub PE=2 SV=1;tr|Q6YJU1|Q6YJU1_MOUSE Fetuin-B OS=Mus	28.6451	29.403	29.0346	29.3551	28.5121	28.5886	29.3211	29.4904	29.1094	28.978	0.995486	0.681708
tr|Q5NC82|Q5NC82_MOUSE Nucleoside diphosphate kinase OS=Mus musculus GN=Nme2 PE=2 SV=1;sp|Q01768|NDKB_MOUSE Nucleoside diphosphate kinase B OS=Mus musculus GN=Nme2 PE=1 SV=1;tr|E9PZF0|E9PZF0_MOUSE Nucleoside diphosphate kinase OS=Mus musculus GN=Gm20390 PE	30.2208	29.1524	28.6709	27.676	29.2488	29.1699	29.5463	28.6963	28.93	29.1653	1.00813	0.687606
sp|Q00897|A1AT4_MOUSE Alpha-1-antitrypsin 1-4 OS=Mus musculus GN=Serpina1d PE=1 SV=1	34.4551	34.7581	34.6312	34.7916	34.1315	34.173	34.8724	35.0538	34.659	34.5577	0.997077	0.698335
tr|Q3TKX1|Q3TKX1_MOUSE ATPase, H+ transporting, lysosomal accessory protein OS=Mus musculus GN=Atp6ap1 PE=1 SV=1;tr|Q3UCY7|Q3UCY7_MOUSE Uncharacterized protein OS=Mus musculus GN=Atp6ap1 PE=2 SV=1;tr|Q3TWN7|Q3TWN7_MOUSE ATPase, H+ transporting, lysosomal a	27.4355	28.0341	27.8699	28.4572	27.465	28.3635	27.826	27.7255	27.9492	27.845	0.996273	0.72579
sp|P17751|TPIS_MOUSE Triosephosphate isomerase OS=Mus musculus GN=Tpi1 PE=1 SV=4;tr|H7BXC3|H7BXC3_MOUSE Triosephosphate isomerase OS=Mus musculus GN=Tpi1 PE=1 SV=1	33.4241	32.5068	32.0791	31.6101	32.8093	32.3771	32.9214	32.1146	32.4051	32.5556	1.00465	0.737766
sp|Q9R0Y5|KAD1_MOUSE Adenylate kinase isoenzyme 1 OS=Mus musculus GN=Ak1 PE=1 SV=1	31.4654	30.438	29.6517	29.6816	30.7182	30.4087	31.2422	29.616	30.3092	30.4963	1.00617	0.743189
sp|Q9QXV0|PCSK1_MOUSE ProSAAS OS=Mus musculus GN=Pcsk1n PE=1 SV=2	30.5871	31.463	31.0714	31.9581	31.291	31.8079	31.359	31.0689	31.2699	31.3817	1.00358	0.746005
tr|Q3UAS4|Q3UAS4_MOUSE Uncharacterized protein OS=Mus musculus GN=Psap PE=2 SV=1;tr|Q3UE29|Q3UE29_MOUSE Uncharacterized protein OS=Mus musculus GN=Psap PE=2 SV=1;tr|E9PZ00|E9PZ00_MOUSE Prosaposin OS=Mus musculus GN=Psap PE=1 SV=1;tr|Q3TXJ0|Q3TXJ0_MOUSE Unc	28.8218	29.0516	28.8578	29.0823	28.8097	29.1401	28.8901	28.8393	28.9534	28.9198	0.99884	0.7492
sp|Q64726|ZA2G_MOUSE Zinc-alpha-2-glycoprotein OS=Mus musculus GN=Azgp1 PE=1 SV=2	27.526	28.3437	28.0161	28.2445	27.5231	27.9235	28.0709	28.288	28.0326	27.9514	0.997104	0.749958
sp|P97447|FHL1_MOUSE Four and a half LIM domains protein 1 OS=Mus musculus GN=Fhl1 PE=1 SV=3;tr|A2AEX8|A2AEX8_MOUSE Four and a half LIM domains 1, isoform CRA_b OS=Mus musculus GN=Fhl1 PE=1 SV=1;tr|A2AEX6|A2AEX6_MOUSE Four and a half LIM domains protein 1	31.6784	29.7283	29.6793	29.104	30.0997	30.2229	30.1147	28.9081	30.0475	29.8363	0.992973	0.753389
tr|A2RTA0|A2RTA0_MOUSE Creatine kinase, muscle OS=Mus musculus GN=Ckm PE=1 SV=1;sp|P07310|KCRM_MOUSE Creatine kinase M-type OS=Mus musculus GN=Ckm PE=1 SV=1;tr|Q9D6U7|Q9D6U7_MOUSE Uncharacterized protein OS=Mus musculus GN=Ckm PE=2 SV=1	35.349	34.7324	33.3662	33.5605	34.6671	34.4601	34.9015	33.6827	34.252	34.4279	1.00513	0.756934
sp|Q9ER58|TICN2_MOUSE Testican-2 OS=Mus musculus GN=Spock2 PE=1 SV=1;tr|Q6PAN0|Q6PAN0_MOUSE Spock2 protein OS=Mus musculus GN=Spock2 PE=2 SV=1;tr|F6SLR4|F6SLR4_MOUSE Testican-2 OS=Mus musculus GN=Spock2 PE=1 SV=1;tr|Q80U51|Q80U51_MOUSE MKIAA0275 protein (F	25.8477	27.2064	27.0662	27.3674	26.5364	27.0582	26.721	26.7033	26.8719	26.7547	0.995638	0.758208
sp|P14152|MDHC_MOUSE Malate dehydrogenase, cytoplasmic OS=Mus musculus GN=Mdh1 PE=1 SV=3	31.8123	30.9172	30.6725	30.055	31.4514	31.0732	31.1827	30.2868	30.8643	30.9985	1.00435	0.771587
tr|Q5ND36|Q5ND36_MOUSE Serine (Or cysteine) peptidase inhibitor, clade F, member 2, isoform CRA_c OS=Mus musculus GN=Serpinf2 PE=1 SV=1;sp|Q61247|A2AP_MOUSE Alpha-2-antiplasmin OS=Mus musculus GN=Serpinf2 PE=1 SV=1;tr|Q5ND35|Q5ND35_MOUSE Alpha-2-antiplasmi	27.7955	27.8615	28.0761	27.7498	27.771	27.8987	27.6374	28.391	27.8707	27.9245	1.00193	0.774432
tr|B7ZNS9|B7ZNS9_MOUSE Cfd protein OS=Mus musculus GN=Cfd PE=2 SV=1;tr|Q3UP47|Q3UP47_MOUSE Complement factor D (Adipsin) OS=Mus musculus GN=Cfd PE=2 SV=1;sp|P03953|CFAD_MOUSE Complement factor D OS=Mus musculus GN=Cfd PE=1 SV=1	29.0714	28.286	27.6497	28.2849	28.1814	27.3135	28.6678	28.6445	28.323	28.2018	0.995722	0.787567
tr|Q3UCD9|Q3UCD9_MOUSE Cathepsin D, isoform CRA_a OS=Mus musculus GN=Ctsd PE=1 SV=1;tr|Q3U7P0|Q3U7P0_MOUSE Uncharacterized protein OS=Mus musculus GN=Ctsd PE=2 SV=1;tr|Q3TWR6|Q3TWR6_MOUSE Uncharacterized protein OS=Mus musculus GN=Ctsd PE=2 SV=1;tr|Q3TWD0|	26.8	27.7775	27.3848	27.6449	27.2896	27.3897	27.4802	27.194	27.4018	27.3384	0.997686	0.787767
tr|A2NHM3|A2NHM3_MOUSE If kappa light chain (Fragment) OS=Mus musculus GN=Igkc PE=1 SV=1	31.9027	31.3113	31.4712	31.8009	31.3978	31.9458	31.4065	31.9712	31.6215	31.6803	1.00186	0.790938
tr|Q3UH37|Q3UH37_MOUSE Uncharacterized protein OS=Mus musculus GN=Nptxr PE=2 SV=1;tr|B9EIV5|B9EIV5_MOUSE Neuronal pentraxin receptor OS=Mus musculus GN=Nptxr PE=2 SV=1;tr|F7BX42|F7BX42_MOUSE Neuronal pentraxin receptor OS=Mus musculus GN=Nptxr PE=1 SV=1;tr	27.2684	28.1869	28.3869	28.3651	27.525	28.3628	27.9259	28.0461	28.0518	27.965	0.996903	0.792941
tr|H9H9R5|H9H9R5_MOUSE Plasma kallikrein OS=Mus musculus GN=Klkb1 PE=1 SV=2;sp|P26262|KLKB1_MOUSE Plasma kallikrein OS=Mus musculus GN=Klkb1 PE=1 SV=2	26.2516	27.1633	26.6063	26.5128	25.8565	26.7688	27.067	27.2113	26.6335	26.7259	1.00347	0.805712
tr|Q5RJV4|Q5RJV4_MOUSE Phosphoglucomutase 2 OS=Mus musculus GN=Pgm2 PE=2 SV=1;sp|Q9D0F9|PGM1_MOUSE Phosphoglucomutase-1 OS=Mus musculus GN=Pgm1 PE=1 SV=4;tr|Q7TNU0|Q7TNU0_MOUSE Pgm2 protein (Fragment) OS=Mus musculus GN=Pgm2 PE=2 SV=1;tr|Q66JR7|Q66JR7_MOUS	30.9646	29.6447	29.3819	28.7965	30.1223	29.7105	30.3853	29.1166	29.6969	29.8337	1.0046	0.806876
tr|Q3UBP0|Q3UBP0_MOUSE Adenylosuccinate synthetase isozyme 1 OS=Mus musculus GN=Adssl1 PE=2 SV=1;sp|P28650|PURA1_MOUSE Adenylosuccinate synthetase isozyme 1 OS=Mus musculus GN=Adssl1 PE=1 SV=2;tr|J3QN31|J3QN31_MOUSE Adenylosuccinate synthetase isozyme 1 OS	28.9177	28.0684	27.9498	26.732	28.3403	28.0695	28.3073	27.4556	27.917	28.0432	1.00452	0.806997
sp|Q80YC5|FA12_MOUSE Coagulation factor XII OS=Mus musculus GN=F12 PE=1 SV=2	26.3814	27.1359	26.9055	26.7348	26.5291	26.8982	26.7279	27.2083	26.7894	26.8409	1.00192	0.818192
tr|I6L985|I6L985_MOUSE Igh protein OS=Mus musculus GN=Igh PE=1 SV=1;tr|A0A075B5P4|A0A075B5P4_MOUSE Ig gamma-1 chain C region secreted form (Fragment) OS=Mus musculus GN=Ighg1 PE=1 SV=1;tr|A0A0A6YWR2|A0A0A6YWR2_MOUSE Ig gamma-1 chain C region secreted form	28.6848	29.7309	29.0175	30.4016	28.6501	28.8594	29.3665	30.4528	29.4587	29.3322	0.995705	0.827387
tr|Q564E2|Q564E2_MOUSE L-lactate dehydrogenase OS=Mus musculus GN=Ldha PE=1 SV=1;sp|P06151|LDHA_MOUSE L-lactate dehydrogenase A chain OS=Mus musculus GN=Ldha PE=1 SV=3;tr|Q3TI99|Q3TI99_MOUSE L-lactate dehydrogenase OS=Mus musculus GN=Ldha PE=2 SV=1;tr|Q3TC	32.0717	31.0899	30.6282	30.1315	31.1718	31.0706	31.0539	30.201	30.9803	30.8743	0.996579	0.829352
sp|Q9WUB3|PYGM_MOUSE Glycogen phosphorylase, muscle form OS=Mus musculus GN=Pygm PE=1 SV=3;tr|E9PUM3|E9PUM3_MOUSE Alpha-1,4 glucan phosphorylase OS=Mus musculus GN=Pygm PE=1 SV=1	32.7616	31.9439	31.0115	30.7705	31.5899	31.9696	31.8517	30.5837	31.6218	31.4987	0.996107	0.831725
sp|Q61129|CFAI_MOUSE Complement factor I OS=Mus musculus GN=Cfi PE=1 SV=3	28.5508	28.7692	28.5671	28.5248	28.4267	28.3058	28.6193	28.9357	28.603	28.5719	0.998912	0.840844
tr|Q5U415|Q5U415_MOUSE Aldo-keto reductase family 1, member B3 (Aldose reductase) OS=Mus musculus GN=Akr1b3 PE=2 SV=1;tr|Q3UDY1|Q3UDY1_MOUSE MCG6067, isoform CRA_b OS=Mus musculus GN=Akr1b3 PE=1 SV=1;sp|P45376|ALDR_MOUSE Aldose reductase OS=Mus musculus GN	30.0392	29.1441	29.1237	28.4775	29.5783	29.0153	29.5259	28.9295	29.1961	29.2622	1.00226	0.861275
tr|Q543R4|Q543R4_MOUSE Uncharacterized protein OS=Mus musculus GN=Cpe PE=1 SV=1;sp|Q00493|CBPE_MOUSE Carboxypeptidase E OS=Mus musculus GN=Cpe PE=1 SV=2	27.9482	28.5593	28.2388	28.5866	28.2977	28.485	28.5443	28.1346	28.3332	28.3654	1.00114	0.861914
tr|Q544Y8|Q544Y8_MOUSE Granulin OS=Mus musculus GN=Grn PE=2 SV=1;tr|Q3UC19|Q3UC19_MOUSE Uncharacterized protein OS=Mus musculus GN=Grn PE=2 SV=1;tr|Q3TX66|Q3TX66_MOUSE Uncharacterized protein OS=Mus musculus GN=Grn PE=2 SV=1;tr|Q3TWT4|Q3TWT4_MOUSE Uncharac	25.5234	25.7913	26.1158	25.8272	26.145	26.0135	25.5683	25.6517	25.8144	25.8446	1.00117	0.875288
tr|Q5FWB7|Q5FWB7_MOUSE Fructose-bisphosphate aldolase OS=Mus musculus GN=Aldoa PE=1 SV=1;sp|P05064|ALDOA_MOUSE Fructose-bisphosphate aldolase A OS=Mus musculus GN=Aldoa PE=1 SV=2;tr|Q6NY00|Q6NY00_MOUSE Fructose-bisphosphate aldolase OS=Mus musculus GN=Aldo	34.898	34.2586	33.307	32.9746	33.8618	33.9589	34.2681	33.0268	33.8596	33.7789	0.997618	0.88047
sp|P21550|ENOB_MOUSE Beta-enolase OS=Mus musculus GN=Eno3 PE=1 SV=3;tr|Q4FK59|Q4FK59_MOUSE Eno3 protein OS=Mus musculus GN=Eno3 PE=2 SV=1;tr|Q5SX59|Q5SX59_MOUSE Beta-enolase (Fragment) OS=Mus musculus GN=Eno3 PE=1 SV=1	33.7607	32.2169	32.0214	31.6439	32.771	31.9352	32.7775	31.8418	32.4107	32.3314	0.997553	0.886233
sp|O88783|FA5_MOUSE Coagulation factor V OS=Mus musculus GN=F5 PE=1 SV=1	25.369	26.2408	25.6209	26.9429	24.9129	26.1158	26.2074	26.6668	26.0434	25.9757	0.997401	0.899418
sp|P97298|PEDF_MOUSE Pigment epithelium-derived factor OS=Mus musculus GN=Serpinf1 PE=1 SV=2	29.3557	30.1915	30.1301	29.908	29.8346	30.0013	29.7981	29.8488	29.8963	29.8707	0.999142	0.899913
tr|Q3UIP2|Q3UIP2_MOUSE Procollagen C-endopeptidase enhancer protein OS=Mus musculus GN=Pcolce PE=1 SV=1;sp|Q61398|PCOC1_MOUSE Procollagen C-endopeptidase enhancer 1 OS=Mus musculus GN=Pcolce PE=1 SV=2;tr|Q3UN82|Q3UN82_MOUSE Uncharacterized protein OS=Mus m	28.0326	28.8367	28.4914	28.8922	28.4337	28.7585	28.6236	28.5456	28.5632	28.5903	1.00095	0.90115
tr|Q9D8L4|Q9D8L4_MOUSE Uncharacterized protein OS=Mus musculus PE=1 SV=1	30.2505	30.0451	28.7053	28.6737	28.954	29.8651	28.9614	30.1643	29.4187	29.4862	1.0023	0.901824
sp|P06745|G6PI_MOUSE Glucose-6-phosphate isomerase OS=Mus musculus GN=Gpi PE=1 SV=4;tr|B7ZWL9|B7ZWL9_MOUSE Glucose-6-phosphate isomerase OS=Mus musculus GN=Gpi1 PE=2 SV=1;tr|B2RXT5|B2RXT5_MOUSE Glucose-6-phosphate isomerase OS=Mus musculus GN=Gpi1 PE=2 SV=	30.9895	29.9368	29.6495	29.1902	30.1986	29.9519	30.3024	29.5277	29.9415	29.9951	1.00179	0.902248
tr|Q61649|Q61649_MOUSE Alpha-globin mRNA (Fragment) OS=Mus musculus PE=2 SV=1	33.521	29.9225	31.3107	29.4818	30.7502	30.6769	31.8078	30.5544	31.059	30.9473	0.996404	0.910591
sp|P47857|PFKAM_MOUSE ATP-dependent 6-phosphofructokinase, muscle type OS=Mus musculus GN=Pfkm PE=1 SV=3;tr|Q99K08|Q99K08_MOUSE ATP-dependent 6-phosphofructokinase OS=Mus musculus GN=Pfkm PE=2 SV=1	28.3705	27.6714	26.8352	26.4371	27.3773	28.3819	27.6176	25.6261	27.3286	27.2507	0.997151	0.918011
tr|Q3TJ94|Q3TJ94_MOUSE Prothrombin OS=Mus musculus GN=F2 PE=1 SV=1;sp|P19221|THRB_MOUSE Prothrombin OS=Mus musculus GN=F2 PE=1 SV=1;tr|H7BX99|H7BX99_MOUSE Prothrombin OS=Mus musculus GN=F2 PE=1 SV=1	29.3593	29.8205	29.6558	29.5597	29.4804	29.4757	29.6729	29.7168	29.5988	29.5865	0.999582	0.918054
tr|E0CXN5|E0CXN5_MOUSE Glycerol-3-phosphate dehydrogenase [NAD(+)] OS=Mus musculus GN=Gpd1 PE=1 SV=1;sp|P13707|GPDA_MOUSE Glycerol-3-phosphate dehydrogenase [NAD(+)], cytoplasmic OS=Mus musculus GN=Gpd1 PE=1 SV=3	28.9633	27.6355	27.3567	25.4991	28.0499	27.3497	27.9572	25.7556	27.3637	27.2781	0.996872	0.926462
tr|Q5UCA9|Q5UCA9_MOUSE Ribonuclease 4 OS=Mus musculus GN=Rnase4 PE=2 SV=1;tr|Q8C7E4|Q8C7E4_MOUSE Ribonuclease 4 OS=Mus musculus GN=Rnase4 PE=1 SV=1;tr|Q6NXX2|Q6NXX2_MOUSE Rnase4 protein OS=Mus musculus GN=Rnase4 PE=2 SV=1;sp|Q9JJH1|RNAS4_MOUSE Ribonuclease	26.8042	27.4849	27.4034	27.5185	27.2961	27.2578	27.3341	27.2695	27.3027	27.2894	0.99951	0.939449
tr|Q3TP88|Q3TP88_MOUSE Uncharacterized protein (Fragment) OS=Mus musculus GN=Col1a2 PE=2 SV=1;tr|Q3TUE2|Q3TUE2_MOUSE Uncharacterized protein (Fragment) OS=Mus musculus GN=Col1a2 PE=2 SV=1;tr|Q3TX57|Q3TX57_MOUSE Procollagen, type I, alpha 2 OS=Mus musculus	26.5579	27.2989	27.1877	27.3078	27.2544	27.3876	27.1646	26.6123	27.0881	27.1047	1.00061	0.948434
tr|Q5NCI4|Q5NCI4_MOUSE Phosphoglycerate mutase OS=Mus musculus GN=Pgam2 PE=1 SV=1;sp|O70250|PGAM2_MOUSE Phosphoglycerate mutase 2 OS=Mus musculus GN=Pgam2 PE=1 SV=3	32.2991	31.5517	30.9339	30.5203	31.499	31.1904	31.8613	30.6296	31.3263	31.2951	0.999005	0.948943
sp|P01027|CO3_MOUSE Complement C3 OS=Mus musculus GN=C3 PE=1 SV=3	32.1224	32.404	32.4715	32.1493	32.5315	31.8663	32.253	32.5389	32.2868	32.2974	1.00033	0.955085
tr|Q543J5|Q543J5_MOUSE Antithrombin OS=Mus musculus GN=Serpinc1 PE=1 SV=1;sp|P32261|ANT3_MOUSE Antithrombin-III OS=Mus musculus GN=Serpinc1 PE=1 SV=1;tr|A0A0A6YWH7|A0A0A6YWH7_MOUSE Antithrombin-III (Fragment) OS=Mus musculus GN=Serpinc1 PE=1 SV=1	30.8304	31.2805	31.2505	31.1734	30.8687	30.8472	31.2252	31.5504	31.1337	31.1229	0.999654	0.957996
sp|P01592|IGJ_MOUSE Immunoglobulin J chain OS=Mus musculus GN=Jchain PE=1 SV=4	27.1275	26.6362	26.1834	25.9924	26.0628	27.3876	26.0993	26.319	26.4849	26.4672	0.999331	0.966236
sp|P16015|CAH3_MOUSE Carbonic anhydrase 3 OS=Mus musculus GN=Ca3 PE=1 SV=3	33.4265	31.7762	31.6837	30.9977	32.3915	31.7985	32.5636	31.2348	31.971	31.9971	1.00081	0.966644
tr|Q61482|Q61482_MOUSE CDE1-binding protein CDEBP OS=Mus musculus GN=Aplp2 PE=4 SV=1;tr|Q60709|Q60709_MOUSE Amyloid-like protein 2 OS=Mus musculus GN=Aplp2 PE=1 SV=1;tr|Q3UDL6|Q3UDL6_MOUSE Uncharacterized protein OS=Mus musculus GN=Aplp2 PE=2 SV=1;tr|A0A1L	25.0461	28.3211	28.077	28.3321	27.0213	27.8341	27.7002	27.351	27.4441	27.4766	1.00119	0.969685
tr|Q5FW62|Q5FW62_MOUSE Serine (Or cysteine) peptidase inhibitor, clade D, member 1 OS=Mus musculus GN=Serpind1 PE=2 SV=1;sp|P49182|HEP2_MOUSE Heparin cofactor 2 OS=Mus musculus GN=Serpind1 PE=1 SV=1	27.0992	27.8494	27.5124	27.4872	27.4377	27.4233	27.4798	27.5849	27.4871	27.4814	0.999795	0.972634
tr|Q545M7|Q545M7_MOUSE Parvalbumin, isoform CRA_a OS=Mus musculus GN=Pvalb PE=1 SV=1;sp|P32848|PRVA_MOUSE Parvalbumin alpha OS=Mus musculus GN=Pvalb PE=1 SV=3	31.9163	32.9446	33.0781	32.5073	32.5644	32.5334	32.704	32.6194	32.6116	32.6053	0.999807	0.98182
sp|Q60590|A1AG1_MOUSE Alpha-1-acid glycoprotein 1 OS=Mus musculus GN=Orm1 PE=1 SV=1;tr|Q91X23|Q91X23_MOUSE Alpha-1-acid glycoprotein OS=Mus musculus GN=Orm1 PE=2 SV=1;tr|Q61613|Q61613_MOUSE Alpha-1-acid glycoprotein (AGP) (Fragment) OS=Mus musculus GN=Orm1	29.1916	29.2189	29.8201	29.466	30.1777	28.4139	29.4315	29.6987	29.4241	29.4305	1.00021	0.987913
tr|Q548W7|Q548W7_MOUSE Diazepam binding inhibitor OS=Mus musculus GN=Dbi PE=1 SV=1;tr|Q3ULV8|Q3ULV8_MOUSE Uncharacterized protein OS=Mus musculus GN=Dbi PE=2 SV=1;sp|P31786|ACBP_MOUSE Acyl-CoA-binding protein OS=Mus musculus GN=Dbi PE=1 SV=2;tr|M0QWU8|M0QW	28.9862	27.7748	28.179	27.4498	28.3843	27.9769	28.3796	27.6253	28.0974	28.0915	0.99979	0.988082
sp|P52480|KPYM_MOUSE Pyruvate kinase PKM OS=Mus musculus GN=Pkm PE=1 SV=4;tr|A0A1L1SU37|A0A1L1SU37_MOUSE Pyruvate kinase PKM (Fragment) OS=Mus musculus GN=Pkm PE=1 SV=1	32.4281	31.9807	31.3809	31.2794	31.9198	31.8776	32.0464	31.2056	31.7673	31.7624	0.999845	0.988542
tr|Q3UEK9|Q3UEK9_MOUSE Alpha-2-HS-glycoprotein, isoform CRA_a OS=Mus musculus GN=Ahsg PE=1 SV=1;tr|Q3UEK5|Q3UEK5_MOUSE Uncharacterized protein OS=Mus musculus GN=Ahsg PE=2 SV=1;tr|Q3TIU3|Q3TIU3_MOUSE Uncharacterized protein OS=Mus musculus GN=Ahsg PE=2 SV=	32.5786	32.6384	32.0278	32.7934	32.4331	31.7258	33.0193	32.8774	32.5096	32.5139	1.00013	0.990047

## Sheet: AppNL-G-F vs Appwt
Supplementary Table 2: Alterations in proteins identifed in all samples of AppNL-G-F/NL-G-F vs Appwt/wt
Uniprot ID and Protein Name	log2 of LFQ intensity (Appwt/wt 1)	log2 of LFQ intensity (Appwt/wt 2)	log2 of LFQ intensity (Appwt/wt 3)	log2 of LFQ intensity (Appwt/wt 4)	Log2 of LFQ intensity (AppNL-G-F/NL-G-F 1)	Log2 of LFQ intensity (AppNL-G-F/NL-G-F 2)	Log2 of LFQ intensity (AppNL-G-F/NL-G-F 3)	Log2 of LFQ intensity (AppNL-G-F/NL-G-F 4)	Average Appwt/wt	Average AppNL-G-F/NL-G-F	Ratio AppNL-G-F/NL-G-F/Appwt/wt	P-value
sp|P0DP28|CALM3_MOUSE Calmodulin-3 OS=Mus musculus GN=Calm3 PE=1 SV=1;sp|P0DP27|CALM2_MOUSE Calmodulin-2 OS=Mus musculus GN=Calm2 PE=1 SV=1;sp|P0DP26|CALM1_MOUSE Calmodulin-1 OS=Mus musculus GN=Calm1 PE=1 SV=1;tr|Q3UKW2|Q3UKW2_MOUSE Calmodulin-1 OS=Mus mus	28.8141	28.7349	28.5537	28.4666	29.2938	29.6434	29.85	29.4169	28.6423	29.551	1.03173	0.0008213
sp|P09813|APOA2_MOUSE Apolipoprotein A-II OS=Mus musculus GN=Apoa2 PE=1 SV=2;tr|A7YL62|A7YL62_MOUSE Apolipoprotein A-II OS=Mus musculus GN=Apoa2 PE=4 SV=1	29.6961	29.0987	28.2026	29.0906	30.6518	30.98	30.7624	30.8246	29.022	30.8047	1.06143	0.00131332
sp|P97290|IC1_MOUSE Plasma protease C1 inhibitor OS=Mus musculus GN=Serping1 PE=1 SV=3;tr|A2ATR8|A2ATR8_MOUSE Plasma protease C1 inhibitor OS=Mus musculus GN=Serping1 PE=1 SV=1	28.9572	29.1554	29.1498	29.2386	28.7718	28.4632	28.2716	28.2525	29.1253	28.4398	0.976464	0.00221991
tr|G3X8T9|G3X8T9_MOUSE Serine (Or cysteine) peptidase inhibitor, clade A, member 3N, isoform CRA_a OS=Mus musculus GN=Serpina3n PE=1 SV=1	27.2856	27.6011	27.7821	27.6705	28.3895	28.2079	28.0269	28.2714	27.5848	28.2239	1.02317	0.0027323
tr|Q3V2G1|Q3V2G1_MOUSE Uncharacterized protein OS=Mus musculus GN=Apoa1 PE=2 SV=1;sp|Q00623|APOA1_MOUSE Apolipoprotein A-I OS=Mus musculus GN=Apoa1 PE=1 SV=2;tr|Q58EV2|Q58EV2_MOUSE Apoa1 protein OS=Mus musculus GN=Apoa1 PE=2 SV=1	33.1551	33.5366	32.7501	32.6052	33.8549	34.9423	34.4935	34.5165	33.0117	34.4518	1.04362	0.00336959
sp|P11087|CO1A1_MOUSE Collagen alpha-1(I) chain OS=Mus musculus GN=Col1a1 PE=1 SV=4;tr|Q99LL6|Q99LL6_MOUSE Col1a1 protein (Fragment) OS=Mus musculus GN=Col1a1 PE=2 SV=1	28.1948	28.8224	28.8095	28.8524	27.8592	26.7028	27.4126	27.4409	28.6698	27.3539	0.954102	0.00378482
sp|Q04447|KCRB_MOUSE Creatine kinase B-type OS=Mus musculus GN=Ckb PE=1 SV=1	28.7141	28.0571	27.4159	27.93	29.0755	30.6798	30.6378	29.9615	28.0293	30.0887	1.07347	0.00424729
tr|B1B0C7|B1B0C7_MOUSE Basement membrane-specific heparan sulfate proteoglycan core protein OS=Mus musculus GN=Hspg2 PE=1 SV=1;tr|E9PZ16|E9PZ16_MOUSE Basement membrane-specific heparan sulfate proteoglycan core protein OS=Mus musculus GN=Hspg2 PE=1 SV=1;tr	25.6992	25.9857	26.1385	26.4401	25.6629	25.3886	25.1592	25.1444	26.0659	25.3388	0.972106	0.0101082
sp|P28665|MUG1_MOUSE Murinoglobulin-1 OS=Mus musculus GN=Mug1 PE=1 SV=3	31.1357	31.3785	30.8156	31.1041	31.4227	32.2015	32.0653	31.769	31.1085	31.8646	1.02431	0.0108235
sp|P12960|CNTN1_MOUSE Contactin-1 OS=Mus musculus GN=Cntn1 PE=1 SV=1	28.6313	28.8804	28.8424	29.0908	28.5661	28.3946	28.1282	27.8618	28.8612	28.2377	0.978395	0.0136367
sp|Q61477|NBL1_MOUSE Neuroblastoma suppressor of tumorigenicity 1 OS=Mus musculus GN=Nbl1 PE=1 SV=2	27.2677	27.6362	28.0205	28.1063	27.4305	26.8846	26.5457	26.5464	27.7577	26.8518	0.967365	0.0188637
sp|P05201|AATC_MOUSE Aspartate aminotransferase, cytoplasmic OS=Mus musculus GN=Got1 PE=1 SV=3	29.7201	29.4652	29.1856	29.1031	28.2845	28.074	29.1648	28.5054	29.3685	28.5072	0.970671	0.020226
tr|A0A1C7CYU3|A0A1C7CYU3_MOUSE Nucleobindin 1, isoform CRA_b OS=Mus musculus GN=Nucb1 PE=1 SV=1;sp|Q02819|NUCB1_MOUSE Nucleobindin-1 OS=Mus musculus GN=Nucb1 PE=1 SV=2;tr|Q8BRD3|Q8BRD3_MOUSE Uncharacterized protein OS=Mus musculus GN=Nucb1 PE=2 SV=1;tr|Q3T	26.6741	27.0616	27.3733	27.1722	26.8825	26.2559	26.1782	26.03	27.0703	26.3367	0.972899	0.0217872
sp|P13020|GELS_MOUSE Gelsolin OS=Mus musculus GN=Gsn PE=1 SV=3;tr|A0A0J9YUQ8|A0A0J9YUQ8_MOUSE Gelsolin (Fragment) OS=Mus musculus GN=Gsn PE=1 SV=1	32.0878	32.3099	32.0055	32.5965	32.0704	31.4705	31.3204	31.5612	32.25	31.6056	0.980021	0.0218459
tr|H9H9R5|H9H9R5_MOUSE Plasma kallikrein OS=Mus musculus GN=Klkb1 PE=1 SV=2;sp|P26262|KLKB1_MOUSE Plasma kallikrein OS=Mus musculus GN=Klkb1 PE=1 SV=2	26.2516	27.1633	26.6063	26.5128	26.9517	27.6021	27.6025	27.3337	26.6335	27.3725	1.02775	0.0238666
tr|Q3TVS6|Q3TVS6_MOUSE Uncharacterized protein OS=Mus musculus GN=Ctsb PE=2 SV=1;sp|P10605|CATB_MOUSE Cathepsin B OS=Mus musculus GN=Ctsb PE=1 SV=2;tr|Q3TC17|Q3TC17_MOUSE Uncharacterized protein OS=Mus musculus GN=Ctsb PE=2 SV=1	29.2436	29.3612	29.5468	29.5934	30.084	29.8804	29.5228	30.0553	29.4363	29.8856	1.01527	0.0257901
tr|Q3U7Z6|Q3U7Z6_MOUSE Phosphoglycerate mutase OS=Mus musculus GN=Pgam1 PE=1 SV=1;sp|Q9DBJ1|PGAM1_MOUSE Phosphoglycerate mutase 1 OS=Mus musculus GN=Pgam1 PE=1 SV=3;tr|Q6NWV5|Q6NWV5_MOUSE Pgam1 protein (Fragment) OS=Mus musculus GN=Pgam1 PE=2 SV=1	26.5325	26.2746	25.6668	25.5677	26.5459	26.9956	27.2504	26.6155	26.0104	26.8519	1.03235	0.0260697
tr|Q5F1Z8|Q5F1Z8_MOUSE GM2 ganglioside activator protein OS=Mus musculus GN=Gm2a PE=1 SV=1;sp|Q60648|SAP3_MOUSE Ganglioside GM2 activator OS=Mus musculus GN=Gm2a PE=1 SV=2	28.3983	28.9417	28.7265	29.4092	28.1596	27.9514	28.385	28.2794	28.8689	28.1938	0.976615	0.0267346
tr|Q3UTR7|Q3UTR7_MOUSE Angiotensinogen OS=Mus musculus GN=Agt PE=1 SV=1;sp|P11859|ANGT_MOUSE Angiotensinogen OS=Mus musculus GN=Agt PE=1 SV=1;tr|Q8VCN0|Q8VCN0_MOUSE Agt protein OS=Mus musculus GN=Agt PE=2 SV=1	30.8729	31.3366	31.5019	31.5636	30.9965	30.8621	30.6887	30.7444	31.3188	30.8229	0.984168	0.0269813
sp|P06728|APOA4_MOUSE Apolipoprotein A-IV OS=Mus musculus GN=Apoa4 PE=1 SV=3;tr|Q9DBN0|Q9DBN0_MOUSE Uncharacterized protein OS=Mus musculus GN=Apoa4 PE=2 SV=1;tr|Q810I7|Q810I7_MOUSE Apoa4 protein OS=Mus musculus GN=Apoa4 PE=2 SV=1;tr|Q01488|Q01488_MUSMC Ap	31.2636	31.6548	31.2991	31.6288	31.7201	31.9407	31.6954	32.0757	31.4616	31.858	1.0126	0.0288138
sp|Q03157|APLP1_MOUSE Amyloid-like protein 1 OS=Mus musculus GN=Aplp1 PE=1 SV=1;tr|Q3U311|Q3U311_MOUSE Uncharacterized protein OS=Mus musculus GN=Aplp1 PE=2 SV=1;tr|A0A0R4IZZ1|A0A0R4IZZ1_MOUSE Amyloid beta (A4)-like protein 1 OS=Mus musculus GN=Aplp1 PE=1	30.367	31.1959	31.0389	31.6234	30.663	29.8888	29.8461	30.1647	31.0563	30.1406	0.970516	0.029248
tr|Q544Y7|Q544Y7_MOUSE Cofilin 1, non-muscle OS=Mus musculus GN=Cfl1 PE=2 SV=1;sp|P18760|COF1_MOUSE Cofilin-1 OS=Mus musculus GN=Cfl1 PE=1 SV=3;tr|F8WGL3|F8WGL3_MOUSE Cofilin-1 OS=Mus musculus GN=Cfl1 PE=1 SV=1;tr|Q9CX22|Q9CX22_MOUSE Uncharacterized protei	27.1963	26.6854	26.0736	26.1465	26.9154	27.5045	27.4725	27.5568	26.5255	27.3623	1.03155	0.0323222
tr|Q3UFS5|Q3UFS5_MOUSE Phospholipid transfer protein OS=Mus musculus GN=Pltp PE=1 SV=1;sp|P55065|PLTP_MOUSE Phospholipid transfer protein OS=Mus musculus GN=Pltp PE=1 SV=1;tr|A2A5K2|A2A5K2_MOUSE Phospholipid transfer protein OS=Mus musculus GN=Pltp PE=1 SV	27.4542	27.9276	27.6324	28.605	27.3701	27.1752	26.5141	27.1356	27.9048	27.0487	0.969324	0.0342334
sp|Q00897|A1AT4_MOUSE Alpha-1-antitrypsin 1-4 OS=Mus musculus GN=Serpina1d PE=1 SV=1	34.4551	34.7581	34.6312	34.7916	34.6554	35.419	35.2467	35.479	34.659	35.2	1.01561	0.0372342
tr|A0A087WSN6|A0A087WSN6_MOUSE Fibronectin OS=Mus musculus GN=Fn1 PE=1 SV=1;tr|B9EHT6|B9EHT6_MOUSE Fibronectin OS=Mus musculus GN=Fn1 PE=1 SV=1;tr|Q3UGY5|Q3UGY5_MOUSE Uncharacterized protein OS=Mus musculus GN=Fn1 PE=2 SV=1;tr|A0A087WR50|A0A087WR50_MOUSE F	30.3312	30.8259	31.1625	31.3812	30.6174	30.2351	29.3905	29.6131	30.9252	29.964	0.968918	0.0380544
tr|Q5SVY2|Q5SVY2_MOUSE Peptidyl-prolyl cis-trans isomerase OS=Mus musculus GN=Ppia PE=1 SV=1;tr|Q3UAJ1|Q3UAJ1_MOUSE Peptidyl-prolyl cis-trans isomerase OS=Mus musculus GN=Ppia PE=2 SV=1;tr|Q3TE63|Q3TE63_MOUSE Peptidyl-prolyl cis-trans isomerase OS=Mus musc	29.9339	29.341	29.2523	29.1743	29.7712	29.8011	30.0569	30.1455	29.4254	29.9437	1.01761	0.0385307
tr|Q3TYD5|Q3TYD5_MOUSE Uncharacterized protein OS=Mus musculus GN=Sparcl1 PE=2 SV=1;sp|P70663|SPRL1_MOUSE SPARC-like protein 1 OS=Mus musculus GN=Sparcl1 PE=1 SV=3;tr|Q3UYK7|Q3UYK7_MOUSE Uncharacterized protein OS=Mus musculus GN=Sparcl1 PE=2 SV=1	32.5321	33.3741	33.2147	33.728	32.9629	32.3121	31.8374	32.0854	33.2123	32.2995	0.972516	0.0394814
tr|Q9D288|Q9D288_MOUSE Uncharacterized protein OS=Mus musculus PE=2 SV=1;tr|Q544K5|Q544K5_MOUSE C-type natriuretic peptide OS=Mus musculus GN=Nppc PE=2 SV=1;sp|Q61839|ANFC_MOUSE C-type natriuretic peptide OS=Mus musculus GN=Nppc PE=3 SV=1	25.9225	26.8175	26.946	27.0354	26.4378	25.4109	25.2228	25.7881	26.6804	25.7149	0.963814	0.0405589
tr|G3X9I1|G3X9I1_MOUSE DNA segment, Chr 6, Wayne State University 176, expressed, isoform CRA_a OS=Mus musculus GN=Fam3c PE=1 SV=1;sp|Q91VU0|FAM3C_MOUSE Protein FAM3C OS=Mus musculus GN=Fam3c PE=1 SV=1;tr|G5E911|G5E911_MOUSE DNA segment, Chr 6, Wayne State	26.305	26.4093	26.6697	26.7696	26.1408	26.186	25.7683	26.3547	26.5384	26.1124	0.983949	0.0413535
tr|B2CQD6|B2CQD6_MOUSE Fibulin-1 OS=Mus musculus GN=Fbln1 PE=2 SV=1;sp|Q08879|FBLN1_MOUSE Fibulin-1 OS=Mus musculus GN=Fbln1 PE=1 SV=2;tr|Q3TWK8|Q3TWK8_MOUSE Fibulin-1 OS=Mus musculus GN=Fbln1 PE=2 SV=1	26.7981	27.9573	27.9126	28.7733	27.333	26.5226	26.5076	26.1228	27.8603	26.6215	0.955535	0.0413752
sp|P29788|VTNC_MOUSE Vitronectin OS=Mus musculus GN=Vtn PE=1 SV=2	29.474	30.2288	30.0844	30.73	29.8042	29.2848	28.9779	29.2459	30.1293	29.3282	0.973411	0.0419706
tr|Q3UH39|Q3UH39_MOUSE Uncharacterized protein OS=Mus musculus GN=Cntn2 PE=2 SV=1;sp|Q61330|CNTN2_MOUSE Contactin-2 OS=Mus musculus GN=Cntn2 PE=1 SV=2;tr|Q3UGZ2|Q3UGZ2_MOUSE Uncharacterized protein OS=Mus musculus GN=Cntn2 PE=2 SV=1;tr|A0A087WQQ9|A0A087WQQ	26.298	27.3883	27.342	27.7487	26.6846	25.8528	26.1469	26.4127	27.1943	26.2742	0.966169	0.0429877
tr|Q9ERV6|Q9ERV6_MOUSE Epidermal growth factor receptor isoform 2 OS=Mus musculus GN=Egfr PE=4 SV=1;tr|Q9WVF5|Q9WVF5_MOUSE Epidermal growth factor receptor OS=Mus musculus GN=Egfr PE=1 SV=1;tr|Q9EP98|Q9EP98_MOUSE Receptor protein-tyrosine kinase OS=Mus mus	25.4386	26.6085	26.1275	26.6569	26.4443	28.3415	27.8706	27.2455	26.2079	27.4755	1.04837	0.0439327
tr|B7ZNR0|B7ZNR0_MOUSE Ecm1 protein OS=Mus musculus GN=Ecm1 PE=2 SV=1;tr|Q9QX30|Q9QX30_MOUSE Extracellular matrix protein OS=Mus musculus PE=4 SV=1;tr|Q3TDX7|Q3TDX7_MOUSE Extracellular matrix protein 1 OS=Mus musculus GN=Ecm1 PE=2 SV=1;sp|Q61508|ECM1_MOUSE	27.1112	28.0482	27.5095	28.1095	27.453	26.9306	26.6909	26.7282	27.6946	26.9507	0.973137	0.0449713
tr|Q3TYE5|Q3TYE5_MOUSE Limbic system-associated membrane protein OS=Mus musculus GN=Lsamp PE=1 SV=1;sp|Q8BLK3|LSAMP_MOUSE Limbic system-associated membrane protein OS=Mus musculus GN=Lsamp PE=1 SV=1;tr|A0A087WP80|A0A087WP80_MOUSE Limbic system-associated m	28.1295	28.9981	29.0796	29.4453	28.4409	28.0968	27.9021	28.2254	28.9131	28.1663	0.97417	0.0476189
tr|Q56A15|Q56A15_MOUSE Cytochrome c OS=Mus musculus GN=Cycs PE=1 SV=1;sp|P62897|CYC_MOUSE Cytochrome c, somatic OS=Mus musculus GN=Cycs PE=1 SV=2	27.8899	27.7138	27.8588	27.5619	27.4273	26.8242	27.4737	27.5199	27.7561	27.3113	0.983973	0.0483182
sp|P51910|APOD_MOUSE Apolipoprotein D OS=Mus musculus GN=Apod PE=1 SV=1	30.7956	31.2214	31.1664	31.6462	31.1273	30.2692	30.4606	30.529	31.2074	30.5965	0.980425	0.0531301
tr|A5JUZ1|A5JUZ1_MOUSE Ubiqutin subunit 1 (Fragment) OS=Mus musculus GN=Ubc PE=2 SV=1;tr|A0A0A6YW67|A0A0A6YW67_MOUSE MCG23377, isoform CRA_b OS=Mus musculus GN=Gm8797 PE=4 SV=1;tr|E9Q9J0|E9Q9J0_MOUSE Ubiquitin-60S ribosomal protein L40 (Fragment) OS=Mus mu	29.4845	29.8471	30.0999	29.8948	30.1845	30.1962	29.9893	30.4283	29.8316	30.1996	1.01234	0.0568086
sp|Q4V9Z5|SE6L2_MOUSE Seizure 6-like protein 2 OS=Mus musculus GN=Sez6l2 PE=1 SV=1	25.8586	26.5294	26.4113	26.1374	26.2248	25.5667	25.1776	25.5368	26.2342	25.6265	0.976837	0.0613762
sp|P47879|IBP4_MOUSE Insulin-like growth factor-binding protein 4 OS=Mus musculus GN=Igfbp4 PE=1 SV=2;tr|H3BLB7|H3BLB7_MOUSE Insulin-like growth factor-binding protein 4 OS=Mus musculus GN=Igfbp4 PE=1 SV=1;tr|Q8BSM9|Q8BSM9_MOUSE Uncharacterized protein OS=	26.4581	27.2264	27.2132	27.1787	27.0113	26.0576	26.1851	26.2317	27.0191	26.3714	0.976029	0.0642852
sp|Q9QUN9|DKK3_MOUSE Dickkopf-related protein 3 OS=Mus musculus GN=Dkk3 PE=2 SV=1	29.297	30.0814	29.9893	30.3784	29.7522	29.1383	29.073	29.299	29.9365	29.3157	0.97926	0.0649455
sp|O09114|PTGDS_MOUSE Prostaglandin-H2 D-isomerase OS=Mus musculus GN=Ptgds PE=1 SV=1	34.4558	35.2204	35.4487	35.7295	34.9834	34.3776	34.3124	34.3626	35.2136	34.509	0.979991	0.0672702
tr|Z4YN57|Z4YN57_MOUSE Phosphoinositide-3-kinase-interacting protein 1 (Fragment) OS=Mus musculus GN=Pik3ip1 PE=1 SV=1;sp|Q7TMJ8|P3IP1_MOUSE Phosphoinositide-3-kinase-interacting protein 1 OS=Mus musculus GN=Pik3ip1 PE=2 SV=1;tr|F6S185|F6S185_MOUSE Phospho	26.8312	27.8614	27.9347	27.9349	27.5339	26.5748	26.7145	26.5669	27.6406	26.8475	0.971309	0.0673586
sp|Q9WVJ3|CBPQ_MOUSE Carboxypeptidase Q OS=Mus musculus GN=Cpq PE=1 SV=1	26.8994	26.8948	27.039	27.0613	26.9739	26.6305	26.7065	26.8219	26.9736	26.7832	0.992939	0.0710631
tr|Q9DC41|Q9DC41_MOUSE Uncharacterized protein OS=Mus musculus GN=Hspa5 PE=2 SV=1;tr|Q3U9G2|Q3U9G2_MOUSE Uncharacterized protein OS=Mus musculus GN=Hspa5 PE=2 SV=1;tr|Q3TWF2|Q3TWF2_MOUSE Uncharacterized protein OS=Mus musculus GN=Hspa5 PE=2 SV=1;sp|P20029|	26.8535	26.6351	26.4722	26.1956	27.2274	26.7085	27.0899	26.7666	26.5391	26.9481	1.01541	0.071186
sp|P26339|CMGA_MOUSE Chromogranin-A OS=Mus musculus GN=Chga PE=1 SV=1;tr|Q3UN28|Q3UN28_MOUSE Uncharacterized protein OS=Mus musculus GN=Chga PE=2 SV=1	30.8099	31.919	32.1479	32.453	31.5708	30.69	30.596	30.7923	31.8324	30.9123	0.971094	0.071922
sp|Q00898|A1AT5_MOUSE Alpha-1-antitrypsin 1-5 OS=Mus musculus GN=Serpina1e PE=1 SV=1	28.6633	29.9143	29.1948	30.6299	29.5862	31.581	31.8663	31.1565	29.6006	31.0475	1.04888	0.072409
sp|Q8R464|CADM4_MOUSE Cell adhesion molecule 4 OS=Mus musculus GN=Cadm4 PE=1 SV=1	24.948	25.4482	25.997	25.5582	24.8167	25.006	25.1505	25.0424	25.4879	25.0039	0.981012	0.0764377
tr|D3Z396|D3Z396_MOUSE Neurotrimin OS=Mus musculus GN=Ntm PE=1 SV=1;tr|Q8BG33|Q8BG33_MOUSE Neurotrimin OS=Mus musculus GN=Ntm PE=1 SV=1;tr|Q3TYC2|Q3TYC2_MOUSE Uncharacterized protein OS=Mus musculus GN=Ntm PE=2 SV=1;sp|Q99PJ0|NTRI_MOUSE Neurotrimin OS=Mus	28.0489	28.8791	29.1272	29.2042	28.4845	28.2924	27.695	28.1143	28.8149	28.1466	0.976807	0.0771187
sp|Q60963|PAFA_MOUSE Platelet-activating factor acetylhydrolase OS=Mus musculus GN=Pla2g7 PE=2 SV=2;tr|Q9DB74|Q9DB74_MOUSE Platelet-activating factor acetylhydrolase OS=Mus musculus GN=Pla2g7 PE=2 SV=1;tr|E9Q330|E9Q330_MOUSE Platelet-activating factor acet	27.4627	27.9599	28.2385	28.7002	27.9163	27.3991	26.8127	27.3062	28.0903	27.3586	0.973951	0.0773757
sp|P68368|TBA4A_MOUSE Tubulin alpha-4A chain OS=Mus musculus GN=Tuba4a PE=1 SV=1;tr|A0A0A0MQA5|A0A0A0MQA5_MOUSE Tubulin alpha chain (Fragment) OS=Mus musculus GN=Tuba4a PE=1 SV=1	28.1848	26.7234	25.912	26.3402	27.4676	28.6968	28.6059	27.484	26.7901	28.0636	1.04754	0.0777308
tr|Q9CWS5|Q9CWS5_MOUSE Uncharacterized protein OS=Mus musculus PE=2 SV=1	34.2301	32.0738	33.4693	31.8596	33.4308	34.9038	34.1452	34.5851	32.9082	34.2662	1.04127	0.0818805
tr|Q3UI56|Q3UI56_MOUSE Annexin OS=Mus musculus GN=Anxa6 PE=2 SV=1;sp|P14824|ANXA6_MOUSE Annexin A6 OS=Mus musculus GN=Anxa6 PE=1 SV=3;tr|F8WIT2|F8WIT2_MOUSE Annexin OS=Mus musculus GN=Anxa6 PE=1 SV=1;tr|Q3TUI1|Q3TUI1_MOUSE Annexin OS=Mus musculus GN=Anxa6	27.611	28.1464	26.8411	26.1579	26.2537	24.9291	26.7824	25.9569	27.1891	25.9805	0.95555	0.0842461
tr|Q9QZ83|Q9QZ83_MOUSE Gamma actin-like protein OS=Mus musculus GN=Actg1 PE=2 SV=1	30.2233	29.5104	29.0285	29.3453	29.7556	30.1517	30.163	30.2746	29.5269	30.0862	1.01894	0.0901006
tr|Q3UIP2|Q3UIP2_MOUSE Procollagen C-endopeptidase enhancer protein OS=Mus musculus GN=Pcolce PE=1 SV=1;sp|Q61398|PCOC1_MOUSE Procollagen C-endopeptidase enhancer 1 OS=Mus musculus GN=Pcolce PE=1 SV=2;tr|Q3UN82|Q3UN82_MOUSE Uncharacterized protein OS=Mus m	28.0326	28.8367	28.4914	28.8922	28.5332	27.8753	27.5544	28.0316	28.5632	27.9986	0.980233	0.0941267
sp|Q8BND5|QSOX1_MOUSE Sulfhydryl oxidase 1 OS=Mus musculus GN=Qsox1 PE=1 SV=1	27.9586	27.9076	28.3198	28.4981	28.0219	27.8162	27.8782	27.7661	28.171	27.8706	0.989335	0.0969862
sp|Q9DBB9|CPN2_MOUSE Carboxypeptidase N subunit 2 OS=Mus musculus GN=Cpn2 PE=1 SV=2;tr|Q642I5|Q642I5_MOUSE Cpn2 protein (Fragment) OS=Mus musculus GN=Cpn2 PE=2 SV=1	26.2949	25.7099	26.133	25.6353	25.99	26.7208	26.4176	26.3659	25.9433	26.3736	1.01659	0.0977489
sp|P47877|IBP2_MOUSE Insulin-like growth factor-binding protein 2 OS=Mus musculus GN=Igfbp2 PE=2 SV=2;tr|Q9D057|Q9D057_MOUSE Uncharacterized protein OS=Mus musculus GN=Igfbp2 PE=2 SV=1	30.3822	31.3066	31.2363	31.4634	31.0415	30.1374	30.0798	30.5544	31.0971	30.4533	0.979296	0.0986506
sp|Q9CRB6|TPPP3_MOUSE Tubulin polymerization-promoting protein family member 3 OS=Mus musculus GN=Tppp3 PE=1 SV=1;tr|Q1JPR8|Q1JPR8_MOUSE Tppp3 protein (Fragment) OS=Mus musculus GN=Tppp3 PE=2 SV=1	26.8762	26.0246	25.3066	25.2902	26.2287	26.3875	27.2872	27.2384	25.8744	26.7854	1.03521	0.0988413
tr|Q4VAI2|Q4VAI2_MOUSE Acid phosphatase 1, soluble OS=Mus musculus GN=Acp1 PE=2 SV=1;sp|Q9D358|PPAC_MOUSE Low molecular weight phosphotyrosine protein phosphatase OS=Mus musculus GN=Acp1 PE=1 SV=3;tr|A0A1W2P7X3|A0A1W2P7X3_MOUSE Low molecular weight phospho	25.8987	24.8433	24.6931	24.6255	25.0524	26.3657	25.7874	26.0207	25.0152	25.8065	1.03164	0.100215
sp|Q9DBD0|ICA_MOUSE Inhibitor of carbonic anhydrase OS=Mus musculus GN=Ica PE=1 SV=1;tr|Q8VC96|Q8VC96_MOUSE Uncharacterized protein OS=Mus musculus GN=1300017J02Rik PE=2 SV=1;tr|D3YY36|D3YY36_MOUSE RIKEN cDNA 1300017J02 gene OS=Mus musculus GN=1300017J02Ri	29.1736	29.7318	29.7254	29.464	29.7536	29.822	29.7237	29.8283	29.5237	29.7819	1.00875	0.1039
tr|A0A0R4J0I1|A0A0R4J0I1_MOUSE MCG1051009 OS=Mus musculus GN=Serpina3k PE=1 SV=1	33.2498	34.212	33.3514	34.1779	33.6343	34.8843	34.5708	34.873	33.7478	34.4906	1.02201	0.107114
tr|A0A0A6YY91|A0A0A6YY91_MOUSE Neural cell adhesion molecule 1 (Fragment) OS=Mus musculus GN=Ncam1 PE=1 SV=1	28.7613	29.7234	29.5517	30.1591	29.4252	28.8442	28.6061	28.7315	29.5489	28.9018	0.978101	0.108656
tr|Q3TKX1|Q3TKX1_MOUSE ATPase, H+ transporting, lysosomal accessory protein OS=Mus musculus GN=Atp6ap1 PE=1 SV=1;tr|Q3UCY7|Q3UCY7_MOUSE Uncharacterized protein OS=Mus musculus GN=Atp6ap1 PE=2 SV=1;tr|Q3TWN7|Q3TWN7_MOUSE ATPase, H+ transporting, lysosomal a	27.4355	28.0341	27.8699	28.4572	27.865	27.3608	27.0676	27.5107	27.9492	27.451	0.982178	0.113044
tr|Q549A5|Q549A5_MOUSE Clusterin OS=Mus musculus GN=Clu PE=1 SV=1;sp|Q06890|CLUS_MOUSE Clusterin OS=Mus musculus GN=Clu PE=1 SV=1;tr|Q9JK98|Q9JK98_MOUSE Clusterin OS=Mus musculus GN=Clu PE=2 SV=1;tr|E9PUU2|E9PUU2_MOUSE Clusterin (Fragment) OS=Mus musculus	32.1144	32.9424	32.4617	33.282	32.7235	31.842	31.7215	31.9958	32.7001	32.0707	0.980752	0.115276
sp|P06909|CFAH_MOUSE Complement factor H OS=Mus musculus GN=Cfh PE=1 SV=2;tr|E9Q8I0|E9Q8I0_MOUSE Complement factor H OS=Mus musculus GN=Cfh PE=1 SV=1;tr|D6RGQ0|D6RGQ0_MOUSE Complement factor H OS=Mus musculus GN=Cfh PE=1 SV=1;tr|E9Q8H9|E9Q8H9_MOUSE Complem	31.1451	31.8133	31.8966	31.8964	31.6251	31.3066	31.0452	31.1776	31.6878	31.2886	0.987402	0.11996
tr|Q3UCD9|Q3UCD9_MOUSE Cathepsin D, isoform CRA_a OS=Mus musculus GN=Ctsd PE=1 SV=1;tr|Q3U7P0|Q3U7P0_MOUSE Uncharacterized protein OS=Mus musculus GN=Ctsd PE=2 SV=1;tr|Q3TWR6|Q3TWR6_MOUSE Uncharacterized protein OS=Mus musculus GN=Ctsd PE=2 SV=1;tr|Q3TWD0|	26.8	27.7775	27.3848	27.6449	28.221	27.6705	27.5715	28.0724	27.4018	27.8838	1.01759	0.120972
sp|P47867|SCG3_MOUSE Secretogranin-3 OS=Mus musculus GN=Scg3 PE=1 SV=1	30.3106	31.0144	31.0583	31.4108	31.0688	30.1106	30.086	30.2203	30.9485	30.3714	0.981353	0.129559
sp|Q61838|PZP_MOUSE Pregnancy zone protein OS=Mus musculus GN=Pzp PE=1 SV=3	33.5959	32.4389	32.5789	31.86	32.674	34.2119	33.6315	33.3188	32.6184	33.459	1.02577	0.132301
sp|Q03265|ATPA_MOUSE ATP synthase subunit alpha, mitochondrial OS=Mus musculus GN=Atp5a1 PE=1 SV=1;tr|D3Z6F5|D3Z6F5_MOUSE ATP synthase subunit alpha OS=Mus musculus GN=Atp5a1 PE=1 SV=1	27.9267	27.443	26.9215	26.543	28.2704	27.8199	28.4868	27.1678	27.2085	27.9362	1.02674	0.133733
sp|Q61220|NELL2_MOUSE Protein kinase C-binding protein NELL2 OS=Mus musculus GN=Nell2 PE=1 SV=3;tr|Q8BM43|Q8BM43_MOUSE Uncharacterized protein (Fragment) OS=Mus musculus GN=Nell2 PE=2 SV=1;tr|Q8BM06|Q8BM06_MOUSE Uncharacterized protein OS=Mus musculus GN=N	27.3938	28.7352	28.3593	29.0639	28.3891	27.4607	27.0363	27.5385	28.3881	27.6061	0.972456	0.139487
tr|Q53ZT3|Q53ZT3_MOUSE Amyloid-beta protein-like protein long isoform OS=Mus musculus GN=App PE=2 SV=1;sp|P12023|A4_MOUSE Amyloid-beta A4 protein OS=Mus musculus GN=App PE=1 SV=3;tr|Q3TWF3|Q3TWF3_MOUSE Uncharacterized protein OS=Mus musculus GN=App PE=2 SV	30.8931	32.0088	31.7321	32.3459	31.693	30.9508	30.7461	31.0598	31.745	31.1124	0.980073	0.139556
tr|A0A0R4J0X5|A0A0R4J0X5_MOUSE Alpha-1-antitrypsin 1-3 OS=Mus musculus GN=Serpina1c PE=1 SV=1	32.5799	32.3232	32.1415	32.2732	31.9838	33.2527	33.0201	33.1451	32.3294	32.8504	1.01611	0.140454
tr|Q8BSI9|Q8BSI9_MOUSE Uncharacterized protein OS=Mus musculus GN=Cdh2 PE=2 SV=1;tr|Q3UIC2|Q3UIC2_MOUSE Uncharacterized protein OS=Mus musculus GN=Cdh2 PE=2 SV=1;sp|P15116|CADH2_MOUSE Cadherin-2 OS=Mus musculus GN=Cdh2 PE=1 SV=2;tr|D3YYT0|D3YYT0_MOUSE Cadh	28.4784	30.1248	29.6936	29.9933	29.3876	28.4162	28.6843	28.9453	29.5726	28.8583	0.975849	0.14691
sp|P97467|AMD_MOUSE Peptidyl-glycine alpha-amidating monooxygenase OS=Mus musculus GN=Pam PE=1 SV=2;tr|F8VQA4|F8VQA4_MOUSE Peptidyl-glycine alpha-amidating monooxygenase OS=Mus musculus GN=Pam PE=1 SV=1;tr|E9Q704|E9Q704_MOUSE Peptidyl-glycine alpha-amidati	27.25	27.8362	27.8466	28.2396	27.7036	27.2999	27.3514	27.3287	27.7931	27.4209	0.986607	0.148996
tr|A8DUP7|A8DUP7_MOUSE Beta-globin OS=Mus musculus GN=Hbbt1 PE=3 SV=1;tr|D0U270|D0U270_MUSMC Beta-globin OS=Mus musculus castaneus GN=Hbbt1 PE=3 SV=1;tr|D0U269|D0U269_MUSMC Beta-globin OS=Mus musculus castaneus GN=Hbbt1 PE=3 SV=1;tr|A8DUK0|A8DUK0_MOUSE Bet	31.1408	29.13	30.3828	28.9209	30.0304	31.2783	30.7807	31.5397	29.8936	30.9073	1.03391	0.154451
tr|Q545I6|Q545I6_MOUSE Cathepsin Z, isoform CRA_b OS=Mus musculus GN=Ctsz PE=1 SV=1;sp|Q9WUU7|CATZ_MOUSE Cathepsin Z OS=Mus musculus GN=Ctsz PE=1 SV=1;tr|Q9ES94|Q9ES94_MOUSE Cathepsin Z OS=Mus musculus GN=Ctsz PE=2 SV=1	26.7723	26.9328	27.3333	27.1078	28.1522	27.3448	27.2362	27.1158	27.0365	27.4623	1.01575	0.15763
tr|Q3UBA6|Q3UBA6_MOUSE Uncharacterized protein OS=Mus musculus GN=Hspa8 PE=2 SV=1;tr|Q3TZJ3|Q3TZJ3_MOUSE Uncharacterized protein OS=Mus musculus GN=Hspa8 PE=2 SV=1;tr|Q3TH56|Q3TH56_MOUSE Uncharacterized protein OS=Mus musculus GN=Hspa8 PE=2 SV=1;tr|Q3TEK2|	29.4023	28.6457	28.6193	27.846	28.7543	29.2462	30.0074	29.1541	28.6283	29.2905	1.02313	0.158841
tr|Q544M1|Q544M1_MOUSE Lymphocyte antigen 6 complex, locus H, isoform CRA_a OS=Mus musculus GN=Ly6h PE=1 SV=1;sp|Q9WUC3|LY6H_MOUSE Lymphocyte antigen 6H OS=Mus musculus GN=Ly6h PE=1 SV=2;tr|Q8K356|Q8K356_MOUSE Lymphocyte antigen 6 complex, locus H OS=Mus m	27.7909	28.7753	28.5904	29.1666	28.5428	27.8244	27.779	28.0199	28.5808	28.0415	0.981132	0.161985
sp|Q80YC5|FA12_MOUSE Coagulation factor XII OS=Mus musculus GN=F12 PE=1 SV=2	26.3814	27.1359	26.9055	26.7348	27.0765	26.9641	27.0401	27.1025	26.7894	27.0458	1.00957	0.164
tr|Q3UAS4|Q3UAS4_MOUSE Uncharacterized protein OS=Mus musculus GN=Psap PE=2 SV=1;tr|Q3UE29|Q3UE29_MOUSE Uncharacterized protein OS=Mus musculus GN=Psap PE=2 SV=1;tr|E9PZ00|E9PZ00_MOUSE Prosaposin OS=Mus musculus GN=Psap PE=1 SV=1;tr|Q3TXJ0|Q3TXJ0_MOUSE Unc	28.8218	29.0516	28.8578	29.0823	29.1884	29.0265	28.9713	29.1641	28.9534	29.0876	1.00463	0.164008
tr|Q3UEL3|Q3UEL3_MOUSE Uncharacterized protein OS=Mus musculus GN=Il1rap PE=2 SV=1;sp|Q61730|IL1AP_MOUSE Interleukin-1 receptor accessory protein OS=Mus musculus GN=Il1rap PE=1 SV=1;tr|E9Q6I2|E9Q6I2_MOUSE Interleukin-1 receptor accessory protein OS=Mus mus	26.517	27.4934	27.121	27.2604	27.3669	27.4741	27.3613	27.5216	27.098	27.431	1.01229	0.167456
tr|D2KHZ9|D2KHZ9_MOUSE Glyceraldehyde-3-phosphate dehydrogenase OS=Mus musculus GN=GAPDH PE=2 SV=1;sp|P16858|G3P_MOUSE Glyceraldehyde-3-phosphate dehydrogenase OS=Mus musculus GN=Gapdh PE=1 SV=2;tr|A0A0A0MQF6|A0A0A0MQF6_MOUSE Glyceraldehyde-3-phosphate deh	32.8966	32.4489	31.1859	31.4438	32.5903	32.5535	33.0698	32.45	31.9938	32.6659	1.02101	0.168
sp|Q8R555|CRAC1_MOUSE Cartilage acidic protein 1 OS=Mus musculus GN=Crtac1 PE=2 SV=1	26.1405	26.8569	27.0363	27.3648	27.0061	26.3519	25.8197	25.8621	26.8496	26.26	0.978039	0.170411
sp|P16045|LEG1_MOUSE Galectin-1 OS=Mus musculus GN=Lgals1 PE=1 SV=3	28.1051	28.4709	27.5769	27.7974	28.0904	28.2078	28.4945	28.5142	27.9876	28.3267	1.01212	0.175603
sp|O88968|TCO2_MOUSE Transcobalamin-2 OS=Mus musculus GN=Tcn2 PE=1 SV=1	25.5482	26.0504	26.4102	26.6296	26.2813	25.4691	25.4956	25.5461	26.1596	25.698	0.982354	0.182559
sp|Q07456|AMBP_MOUSE Protein AMBP OS=Mus musculus GN=Ambp PE=1 SV=2	27.4122	27.1976	27.3903	27.232	27.4682	27.5606	27.2858	27.3962	27.308	27.4277	1.00438	0.183431
tr|Q3TY66|Q3TY66_MOUSE Chromogranin B OS=Mus musculus GN=Chgb PE=1 SV=1;sp|P16014|SCG1_MOUSE Secretogranin-1 OS=Mus musculus GN=Chgb PE=1 SV=2;tr|Q8BP91|Q8BP91_MOUSE Uncharacterized protein OS=Mus musculus GN=Chgb PE=2 SV=1;tr|Q3UZU8|Q3UZU8_MOUSE Uncharact	31.6809	32.5242	32.7138	33.0156	32.474	31.7447	31.7856	31.9602	32.4836	31.9911	0.984839	0.187964
tr|Q5FW97|Q5FW97_MOUSE Enolase 1, alpha non-neuron OS=Mus musculus GN=EG433182 PE=1 SV=1;sp|P17182|ENOA_MOUSE Alpha-enolase OS=Mus musculus GN=Eno1 PE=1 SV=3;tr|Q6PHC1|Q6PHC1_MOUSE Alpha-enolase OS=Mus musculus GN=Eno1 PE=1 SV=1	30.1077	29.4916	29.3295	28.9261	29.7178	29.7208	30.1736	29.8241	29.4638	29.8591	1.01342	0.190607
tr|Q3TGR2|Q3TGR2_MOUSE Fibrinogen, B beta polypeptide, isoform CRA_a OS=Mus musculus GN=Fgb PE=1 SV=1;sp|Q8K0E8|FIBB_MOUSE Fibrinogen beta chain OS=Mus musculus GN=Fgb PE=1 SV=1	27.9148	28.8353	28.7671	28.4898	29.5117	28.5782	28.6071	29.0759	28.5017	28.9432	1.01549	0.197414
sp|Q9ESB3|HRG_MOUSE Histidine-rich glycoprotein OS=Mus musculus GN=Hrg PE=1 SV=2;tr|A0A0R4J039|A0A0R4J039_MOUSE Histidine-rich glycoprotein OS=Mus musculus GN=Hrg PE=1 SV=1	28.134	29.2966	29.2813	29.2253	29.517	29.3161	29.3163	29.4587	28.9843	29.402	1.01441	0.197682
tr|Q543C5|Q543C5_MOUSE Osteoglycin OS=Mus musculus GN=Ogn PE=1 SV=1;sp|Q62000|MIME_MOUSE Mimecan OS=Mus musculus GN=Ogn PE=1 SV=1	26.2981	27.3711	26.5368	27.7317	26.2231	25.4021	26.9276	26.6676	26.9844	26.3051	0.974825	0.203545
sp|P01027|CO3_MOUSE Complement C3 OS=Mus musculus GN=C3 PE=1 SV=3	32.1224	32.404	32.4715	32.1493	32.4625	33.1446	32.3235	32.3949	32.2868	32.5814	1.00912	0.209175
tr|Q3UST4|Q3UST4_MOUSE Uncharacterized protein (Fragment) OS=Mus musculus GN=Nptx1 PE=2 SV=1;tr|A2ACL9|A2ACL9_MOUSE Neuronal pentraxin 1 OS=Mus musculus GN=Nptx1 PE=1 SV=1;sp|Q62443|NPTX1_MOUSE Neuronal pentraxin-1 OS=Mus musculus GN=Nptx1 PE=1 SV=1	27.0572	28.2234	28.1027	28.1095	27.812	27.1788	27.1984	27.5506	27.8732	27.435	0.984278	0.210756
tr|Q3TXR9|Q3TXR9_MOUSE Beta-hexosaminidase OS=Mus musculus GN=Hexb PE=1 SV=1;sp|P20060|HEXB_MOUSE Beta-hexosaminidase subunit beta OS=Mus musculus GN=Hexb PE=1 SV=2	29.3802	30.233	30.3957	30.573	30.2339	29.6175	29.3475	29.5784	30.1455	29.6943	0.985034	0.214752
tr|Q545M7|Q545M7_MOUSE Parvalbumin, isoform CRA_a OS=Mus musculus GN=Pvalb PE=1 SV=1;sp|P32848|PRVA_MOUSE Parvalbumin alpha OS=Mus musculus GN=Pvalb PE=1 SV=3	31.9163	32.9446	33.0781	32.5073	32.7941	30.7091	31.6262	32.4364	32.6116	31.8914	0.977918	0.225011
sp|B5X0G2|MUP17_MOUSE Major urinary protein 17 OS=Mus musculus GN=Mup17 PE=2 SV=2;tr|A2CEK6|A2CEK6_MOUSE Major urinary protein 11 OS=Mus musculus GN=Mup13 PE=3 SV=1;tr|L7N222|L7N222_MOUSE Major urinary protein 13 OS=Mus musculus GN=Mup13 PE=3 SV=1;tr|B0V38	28.1505	29.7586	28.8741	29.2879	29.8705	29.4202	29.3195	29.4117	29.0178	29.5055	1.01681	0.227314
tr|Q542X9|Q542X9_MOUSE Superoxide dismutase [Cu-Zn] OS=Mus musculus GN=Sod3 PE=1 SV=1;tr|O88592|O88592_MOUSE Superoxide dismutase [Cu-Zn] OS=Mus musculus GN=Sod3 PE=2 SV=1;sp|O09164|SODE_MOUSE Extracellular superoxide dismutase [Cu-Zn] OS=Mus musculus GN=S	27.1446	27.6976	27.4539	27.5113	27.3619	27.3951	26.8345	27.2922	27.4518	27.2209	0.991588	0.232522
sp|P46412|GPX3_MOUSE Glutathione peroxidase 3 OS=Mus musculus GN=Gpx3 PE=1 SV=2;tr|A0A1C7ZMZ5|A0A1C7ZMZ5_MOUSE Glutathione peroxidase (Fragment) OS=Mus musculus GN=Gpx3 PE=1 SV=1;tr|A0A1C7ZMZ7|A0A1C7ZMZ7_MOUSE Glutathione peroxidase 3 (Fragment) OS=Mus mus	27.8367	27.9826	27.415	27.4018	27.5649	28.1225	27.8213	28.2652	27.659	27.9435	1.01028	0.234423
tr|Q547B5|Q547B5_MOUSE Osteopontin OS=Mus musculus GN=Spp1 PE=1 SV=1;sp|P10923|OSTP_MOUSE Osteopontin OS=Mus musculus GN=Spp1 PE=1 SV=1;tr|F8WIP8|F8WIP8_MOUSE Osteopontin OS=Mus musculus GN=Spp1 PE=1 SV=1;tr|Q3UZY3|Q3UZY3_MOUSE Uncharacterized protein OS=M	29.2462	30.2389	30.1489	30.055	30.0089	28.8473	29.138	29.8336	29.9223	29.457	0.984449	0.24252
tr|Q3TT51|Q3TT51_MOUSE Secretogranin V, isoform CRA_b OS=Mus musculus GN=Scg5 PE=1 SV=1;sp|P12961|7B2_MOUSE Neuroendocrine protein 7B2 OS=Mus musculus GN=Scg5 PE=1 SV=1	28.7445	29.8981	30.0172	30.4367	29.6624	28.9115	29.149	29.3312	29.7741	29.2635	0.982852	0.243942
sp|Q61361|PGCB_MOUSE Brevican core protein OS=Mus musculus GN=Bcan PE=1 SV=2	27.2869	28.5794	28.7414	29.2756	28.4699	27.5975	27.6004	27.823	28.4708	27.8727	0.978992	0.249667
tr|Q3V1T9|Q3V1T9_MOUSE Plasminogen OS=Mus musculus GN=Plg PE=2 SV=1;sp|P20918|PLMN_MOUSE Plasminogen OS=Mus musculus GN=Plg PE=1 SV=3;tr|Q6TCI0|Q6TCI0_MOUSE Angiostatin OS=Mus musculus GN=Plg PE=2 SV=1	31.092	31.7728	31.4503	31.6077	31.7076	31.7884	31.4935	31.7432	31.4807	31.6832	1.00643	0.250902
tr|Q3TAZ7|Q3TAZ7_MOUSE Uncharacterized protein OS=Mus musculus GN=Csf1r PE=2 SV=1;tr|Q3U4N8|Q3U4N8_MOUSE Receptor protein-tyrosine kinase (Fragment) OS=Mus musculus GN=Csf1r PE=2 SV=1;tr|Q3U1X4|Q3U1X4_MOUSE Receptor protein-tyrosine kinase (Fragment) OS=Mu	27.0495	27.4394	27.7443	27.616	27.6794	26.9815	26.9654	27.0805	27.4623	27.1767	0.989601	0.255233
tr|A0A1W2P7Y9|A0A1W2P7Y9_MOUSE Neuronal cell adhesion molecule OS=Mus musculus GN=Nrcam PE=1 SV=1;sp|Q810U4|NRCAM_MOUSE Neuronal cell adhesion molecule OS=Mus musculus GN=Nrcam PE=1 SV=2	27.7033	29.1637	29.0523	29.5234	28.8634	28.0573	28.0207	28.2691	28.8606	28.3026	0.980665	0.255252
tr|Q3UEM7|Q3UEM7_MOUSE Uncharacterized protein OS=Mus musculus GN=Fgg PE=1 SV=1;sp|Q8VCM7|FIBG_MOUSE Fibrinogen gamma chain OS=Mus musculus GN=Fgg PE=1 SV=1;tr|Q3UER8|Q3UER8_MOUSE Fibrinogen gamma chain OS=Mus musculus GN=Fgg PE=1 SV=1	27.921	28.937	28.8604	28.6206	29.7778	28.627	28.6366	29.0866	28.5848	29.032	1.01565	0.255796
sp|Q01853|TERA_MOUSE Transitional endoplasmic reticulum ATPase OS=Mus musculus GN=Vcp PE=1 SV=4;tr|Q8BNF8|Q8BNF8_MOUSE Uncharacterized protein OS=Mus musculus GN=Vcp PE=2 SV=1	28.5629	27.3581	26.8548	26.791	27.0567	28.6944	28.301	28.2062	27.3917	28.0646	1.02457	0.259865
sp|P09535|IGF2_MOUSE Insulin-like growth factor II OS=Mus musculus GN=Igf2 PE=1 SV=1;tr|D3Z4N4|D3Z4N4_MOUSE Insulin-like growth factor II (Fragment) OS=Mus musculus GN=Igf2 PE=1 SV=2	27.498	28.7611	29.1073	29.0918	28.75	27.9701	27.5934	27.8988	28.6146	28.0531	0.980378	0.261781
sp|P68134|ACTS_MOUSE Actin, alpha skeletal muscle OS=Mus musculus GN=Acta1 PE=1 SV=1;tr|Q9CXK3|Q9CXK3_MOUSE Uncharacterized protein OS=Mus musculus GN=Actc1 PE=2 SV=1;tr|Q497E4|Q497E4_MOUSE Actin, alpha, cardiac muscle 1 OS=Mus musculus GN=Actc1 PE=2 SV=1;	31.6764	31.1344	30.9425	30.7021	31.3485	31.1461	31.7989	31.36	31.1138	31.4134	1.00963	0.274017
sp|P10649|GSTM1_MOUSE Glutathione S-transferase Mu 1 OS=Mus musculus GN=Gstm1 PE=1 SV=2;tr|A2AE89|A2AE89_MOUSE Glutathione S-transferase Mu 1 OS=Mus musculus GN=Gstm1 PE=1 SV=2	29.9608	29.1021	28.4598	28.4606	29.4878	29.0121	29.7627	29.5971	28.9958	29.4649	1.01618	0.274674
tr|Q5ND36|Q5ND36_MOUSE Serine (Or cysteine) peptidase inhibitor, clade F, member 2, isoform CRA_c OS=Mus musculus GN=Serpinf2 PE=1 SV=1;sp|Q61247|A2AP_MOUSE Alpha-2-antiplasmin OS=Mus musculus GN=Serpinf2 PE=1 SV=1;tr|Q5ND35|Q5ND35_MOUSE Alpha-2-antiplasmi	27.7955	27.8615	28.0761	27.7498	28.2906	28.0612	27.7541	28.0016	27.8707	28.0269	1.0056	0.280743
sp|P70274|SEPP1_MOUSE Selenoprotein P OS=Mus musculus GN=Selenop PE=1 SV=3;tr|E0CZC5|E0CZC5_MOUSE Selenoprotein P (Fragment) OS=Mus musculus GN=Selenop PE=1 SV=1;tr|E0CX80|E0CX80_MOUSE Selenoprotein P (Fragment) OS=Mus musculus GN=Selenop PE=1 SV=1	26.5212	26.0229	25.771	26.2707	25.3605	25.8352	26.0428	26.1996	26.1465	25.8595	0.989025	0.283029
tr|Q5UCA9|Q5UCA9_MOUSE Ribonuclease 4 OS=Mus musculus GN=Rnase4 PE=2 SV=1;tr|Q8C7E4|Q8C7E4_MOUSE Ribonuclease 4 OS=Mus musculus GN=Rnase4 PE=1 SV=1;tr|Q6NXX2|Q6NXX2_MOUSE Rnase4 protein OS=Mus musculus GN=Rnase4 PE=2 SV=1;sp|Q9JJH1|RNAS4_MOUSE Ribonuclease	26.8042	27.4849	27.4034	27.5185	27.5747	26.7301	26.7817	26.9221	27.3027	27.0022	0.988991	0.287232
sp|P63028|TCTP_MOUSE Translationally-controlled tumor protein OS=Mus musculus GN=Tpt1 PE=1 SV=1;tr|D3YU75|D3YU75_MOUSE Translationally-controlled tumor protein OS=Mus musculus GN=Tpt1 PE=1 SV=1	26.3938	25.9329	25.4158	25.3626	25.5454	26.0425	26.4397	26.7061	25.7763	26.1834	1.0158	0.289301
sp|E9PV24|FIBA_MOUSE Fibrinogen alpha chain OS=Mus musculus GN=Fga PE=1 SV=1	28.299	29.058	29.0613	28.781	29.5843	28.8423	28.7945	29.1552	28.7998	29.094	1.01022	0.293325
sp|Q61171|PRDX2_MOUSE Peroxiredoxin-2 OS=Mus musculus GN=Prdx2 PE=1 SV=3;tr|D3Z4A4|D3Z4A4_MOUSE Peroxiredoxin-2 (Fragment) OS=Mus musculus GN=Prdx2 PE=1 SV=8;tr|Q5M9N9|Q5M9N9_MOUSE Prdx2 protein OS=Mus musculus GN=Prdx2 PE=2 SV=1	31.5494	29.753	29.9467	29.2917	29.9487	31.7246	30.5773	31.132	30.1352	30.8456	1.02358	0.296016
sp|P17563|SBP1_MOUSE Selenium-binding protein 1 OS=Mus musculus GN=Selenbp1 PE=1 SV=2;sp|Q63836|SBP2_MOUSE Selenium-binding protein 2 OS=Mus musculus GN=Selenbp2 PE=1 SV=2;tr|A0A0R4J135|A0A0R4J135_MOUSE Selenium-binding protein 2 OS=Mus musculus GN=Selenbp	28.0844	26.6562	26.3112	25.3517	27.131	27.3109	27.525	27.0297	26.6009	27.2492	1.02437	0.303848
tr|A2NHM3|A2NHM3_MOUSE If kappa light chain (Fragment) OS=Mus musculus GN=Igkc PE=1 SV=1	31.9027	31.3113	31.4712	31.8009	33.0127	31.1605	32.3293	31.8345	31.6215	32.0842	1.01463	0.307635
sp|P56480|ATPB_MOUSE ATP synthase subunit beta, mitochondrial OS=Mus musculus GN=Atp5b PE=1 SV=2	28.8455	27.8706	27.3572	27.1304	28.5663	28.1396	28.9084	27.6568	27.8009	28.3178	1.01859	0.311188
sp|P13634|CAH1_MOUSE Carbonic anhydrase 1 OS=Mus musculus GN=Ca1 PE=1 SV=4	31.2355	29.1861	30.2987	28.9107	29.9434	31.2192	30.1295	31.1148	29.9077	30.6017	1.0232	0.311417
sp|P27773|PDIA3_MOUSE Protein disulfide-isomerase A3 OS=Mus musculus GN=Pdia3 PE=1 SV=2	27.1394	27.2321	26.8165	26.0313	27.6088	26.6799	27.5079	26.9383	26.8049	27.1837	1.01413	0.324024
sp|Q60841|RELN_MOUSE Reelin OS=Mus musculus GN=Reln PE=1 SV=3	25.1196	26.1114	26.0994	26.132	25.98	25.85	24.896	25.2008	25.8656	25.4817	0.985157	0.326278
sp|Q9QXV0|PCSK1_MOUSE ProSAAS OS=Mus musculus GN=Pcsk1n PE=1 SV=2	30.5871	31.463	31.0714	31.9581	31.2456	30.2405	31.1707	30.8537	31.2699	30.8776	0.987456	0.330106
tr|A8DUL0|A8DUL0_MOUSE Beta-globin OS=Mus musculus GN=Hbbt1 PE=3 SV=1	38.1452	36.2608	37.0873	36.0118	36.4245	38.3572	37.349	38.0721	36.8763	37.5507	1.01829	0.336916
sp|P15327|PMGE_MOUSE Bisphosphoglycerate mutase OS=Mus musculus GN=Bpgm PE=1 SV=2;tr|Q3TAQ8|Q3TAQ8_MOUSE Phosphoglycerate mutase OS=Mus musculus GN=Bpgm PE=2 SV=1;tr|D3Z223|D3Z223_MOUSE Phosphoglycerate mutase (Fragment) OS=Mus musculus GN=Bpgm PE=1 SV=1	29.7965	27.6533	28.0144	26.3585	27.7512	29.8854	28.513	29.194	27.9557	28.8359	1.03149	0.337101
tr|Q9D2D1|Q9D2D1_MOUSE Carboxypeptidase OS=Mus musculus GN=Ctsa PE=2 SV=1;tr|Q544R6|Q544R6_MOUSE Carboxypeptidase OS=Mus musculus GN=Ctsa PE=1 SV=1;sp|P16675|PPGB_MOUSE Lysosomal protective protein OS=Mus musculus GN=Ctsa PE=1 SV=1;tr|G3X8T3|G3X8T3_MOUSE C	25.8778	26.1048	26.3975	26.8058	27.0284	26.4222	26.2087	26.6303	26.2965	26.5724	1.01049	0.339174
tr|Q6GT24|Q6GT24_MOUSE Peroxiredoxin-6 OS=Mus musculus GN=Prdx6 PE=1 SV=1;tr|Q53ZU7|Q53ZU7_MOUSE Peroxiredoxin 6 OS=Mus musculus GN=Prdx6 PE=2 SV=1;sp|O08709|PRDX6_MOUSE Peroxiredoxin-6 OS=Mus musculus GN=Prdx6 PE=1 SV=3;tr|Q6A0D0|Q6A0D0_MOUSE MKIAA0106 pr	28.8611	27.6653	27.9205	27.147	27.7136	28.6181	28.5088	28.472	27.8985	28.3281	1.0154	0.339851
tr|A0A1L1SUX8|A0A1L1SUX8_MOUSE Thy-1 membrane glycoprotein (Fragment) OS=Mus musculus GN=Thy1 PE=1 SV=1;tr|Q53YX2|Q53YX2_MOUSE CD90.1 OS=Mus musculus GN=Thy1 PE=2 SV=1;sp|P01831|THY1_MOUSE Thy-1 membrane glycoprotein OS=Mus musculus GN=Thy1 PE=1 SV=1	28.3602	29.1721	29.1263	28.8995	29.2243	28.9239	29.1062	29.1098	28.8895	29.091	1.00697	0.344301
tr|A8DUQ1|A8DUQ1_MOUSE Beta-globin OS=Mus musculus GN=Hbbt1 PE=3 SV=1	35.3715	33.1819	33.9136	32.9901	33.4325	35.3697	34.37	35.1237	33.8643	34.574	1.02096	0.346085
tr|Q61649|Q61649_MOUSE Alpha-globin mRNA (Fragment) OS=Mus musculus PE=2 SV=1	33.521	29.9225	31.3107	29.4818	30.5984	33.5156	32.0705	32.4804	31.059	32.1662	1.03565	0.349461
sp|P22005|PENK_MOUSE Proenkephalin-A OS=Mus musculus GN=Penk PE=1 SV=2;tr|Q3UXY8|Q3UXY8_MOUSE Uncharacterized protein (Fragment) OS=Mus musculus GN=Penk PE=2 SV=1;tr|B1AZQ0|B1AZQ0_MOUSE Proenkephalin-A (Fragment) OS=Mus musculus GN=Penk PE=1 SV=1	29.2953	29.6547	30.1714	30.3421	29.8254	29.3261	29.5482	29.6983	29.8659	29.5995	0.99108	0.349751
tr|A0A075B5P6|A0A075B5P6_MOUSE Ig mu chain C region (Fragment) OS=Mus musculus GN=Ighm PE=1 SV=1;sp|P01872|IGHM_MOUSE Ig mu chain C region OS=Mus musculus GN=Ighm PE=1 SV=2;tr|A0A075B6A0|A0A075B6A0_MOUSE Ig mu chain C region (Fragment) OS=Mus musculus GN=I	32.4842	32.4687	30.6963	32.0169	34.8689	31.1341	33.1146	32.1851	31.9165	32.8257	1.02848	0.349945
tr|Q3UWP8|Q3UWP8_MOUSE Uncharacterized protein (Fragment) OS=Mus musculus GN=Calr PE=2 SV=1;tr|B2MWM9|B2MWM9_MOUSE Calreticulin OS=Mus musculus GN=Calr PE=1 SV=1;sp|P14211|CALR_MOUSE Calreticulin OS=Mus musculus GN=Calr PE=1 SV=1	27.1231	27.5806	27.5023	27.0834	27.8375	27.4083	27.5701	27.2082	27.3224	27.506	1.00672	0.357803
sp|P40142|TKT_MOUSE Transketolase OS=Mus musculus GN=Tkt PE=1 SV=1;tr|A0A286YE28|A0A286YE28_MOUSE Transketolase (Fragment) OS=Mus musculus GN=Tkt PE=4 SV=1	28.2754	26.5408	26.9228	26.1635	27.0372	27.6662	27.7797	27.3659	26.9756	27.4623	1.01804	0.358371
tr|Q91WQ0|Q91WQ0_MOUSE Serine (Or cysteine) peptidase inhibitor, clade A, member 6 OS=Mus musculus GN=Serpina6 PE=2 SV=1;sp|Q06770|CBG_MOUSE Corticosteroid-binding globulin OS=Mus musculus GN=Serpina6 PE=1 SV=1;tr|Q3UKW1|Q3UKW1_MOUSE Uncharacterized protei	29.175	28.6621	28.9615	28.7536	28.92	28.7692	28.6189	28.7377	28.8881	28.7615	0.995618	0.367917
tr|Q8K016|Q8K016_MOUSE Inter-alpha trypsin inhibitor, heavy chain 2 OS=Mus musculus GN=Itih2 PE=2 SV=1;sp|Q61703|ITIH2_MOUSE Inter-alpha-trypsin inhibitor heavy chain H2 OS=Mus musculus GN=Itih2 PE=1 SV=1;tr|G3X977|G3X977_MOUSE Inter-alpha trypsin inhibito	28.8142	28.3867	28.3223	28.437	28.4524	28.9181	28.6314	28.5355	28.49	28.6343	1.00506	0.373359
sp|Q91X72|HEMO_MOUSE Hemopexin OS=Mus musculus GN=Hpx PE=1 SV=2;tr|Q8K1U6|Q8K1U6_MOUSE Hemopexin (Fragment) OS=Mus musculus PE=4 SV=1	33.3092	33.5124	34.0763	33.6696	33.4942	33.3696	33.4788	33.5804	33.6419	33.4807	0.99521	0.375018
tr|Q5M9K1|Q5M9K1_MOUSE Transthyretin OS=Mus musculus GN=Ttr PE=1 SV=1;sp|P07309|TTHY_MOUSE Transthyretin OS=Mus musculus GN=Ttr PE=1 SV=1;tr|Q9D6A4|Q9D6A4_MOUSE Transthyretin OS=Mus musculus GN=Ttr PE=2 SV=1	32.5787	34.2514	34.2667	34.4176	33.8581	33.0642	33.2206	33.5773	33.8786	33.4301	0.98676	0.37689
tr|Q4FK40|Q4FK40_MOUSE Apoe protein OS=Mus musculus GN=Apoe PE=2 SV=1;tr|Q3UBS0|Q3UBS0_MOUSE Uncharacterized protein OS=Mus musculus GN=Apoe PE=2 SV=1;tr|Q3TXU4|Q3TXU4_MOUSE Apolipoprotein E, isoform CRA_h OS=Mus musculus GN=Apoe PE=1 SV=1;sp|P08226|APOE_M	33.1681	34.2015	34.0477	34.2766	34.1793	33.5573	33.1872	33.5216	33.9235	33.6114	0.990799	0.379842
tr|Q8BPF4|Q8BPF4_MOUSE Uncharacterized protein OS=Mus musculus PE=2 SV=1;tr|Q9QWJ3|Q9QWJ3_MOUSE Alpha-1-globin (Fragment) OS=Mus musculus PE=2 SV=1	37.4379	35.846	36.7364	35.5341	36.187	37.5382	36.5796	37.2603	36.3886	36.8913	1.01382	0.381029
tr|Q8CEH8|Q8CEH8_MOUSE Profilin OS=Mus musculus GN=Pfn1 PE=2 SV=1;tr|Q5SX50|Q5SX50_MOUSE Profilin OS=Mus musculus GN=Pfn1 PE=1 SV=1;sp|P62962|PROF1_MOUSE Profilin-1 OS=Mus musculus GN=Pfn1 PE=1 SV=2;tr|Q3U7V7|Q3U7V7_MOUSE Profilin OS=Mus musculus GN=Pfn1 P	26.3553	25.623	25.2849	25.1713	25.67	25.911	25.9725	25.9166	25.6086	25.8675	1.01011	0.383008
tr|Q571D4|Q571D4_MOUSE MKIAA0387 protein (Fragment) OS=Mus musculus GN=Ptprn2 PE=2 SV=1;tr|Q3UU93|Q3UU93_MOUSE Receptor-type tyrosine-protein phosphatase N2 OS=Mus musculus GN=Ptprn2 PE=1 SV=1;tr|A3KN68|A3KN68_MOUSE Protein tyrosine phosphatase, receptor t	26.643	27.8541	27.751	28.0613	27.7774	26.8159	27.0137	27.2794	27.5774	27.2216	0.9871	0.385473
tr|Q3UEK9|Q3UEK9_MOUSE Alpha-2-HS-glycoprotein, isoform CRA_a OS=Mus musculus GN=Ahsg PE=1 SV=1;tr|Q3UEK5|Q3UEK5_MOUSE Uncharacterized protein OS=Mus musculus GN=Ahsg PE=2 SV=1;tr|Q3TIU3|Q3TIU3_MOUSE Uncharacterized protein OS=Mus musculus GN=Ahsg PE=2 SV=	32.5786	32.6384	32.0278	32.7934	32.6725	32.7386	32.6949	32.5681	32.5096	32.6685	1.00489	0.387686
tr|Q91XL1|Q91XL1_MOUSE Leucine-rich HEV glycoprotein OS=Mus musculus GN=Lrg1 PE=1 SV=1	27.2946	27.9604	28.6144	28.0042	27.7918	27.5664	27.58	27.8921	27.9684	27.7076	0.990676	0.389781
tr|A5GZX3|A5GZX3_MOUSE Lactoylglutathione lyase OS=Mus musculus GN=Glo1 PE=1 SV=1;sp|Q9CPU0|LGUL_MOUSE Lactoylglutathione lyase OS=Mus musculus GN=Glo1 PE=1 SV=3	28.048	26.931	27.0134	26.3122	26.8226	27.5976	27.6561	27.7825	27.0762	27.4647	1.01435	0.391021
tr|Q0VGU4|Q0VGU4_MOUSE MCG18019 OS=Mus musculus GN=Vgf PE=1 SV=1	30.1657	30.5237	30.9185	31.194	30.7716	30.2731	30.3703	30.4651	30.7005	30.47	0.992494	0.391622
tr|A8IP69|A8IP69_MOUSE 14-3-3 protein gamma subtype OS=Mus musculus GN=Ywhag PE=1 SV=1;sp|P61982|1433G_MOUSE 14-3-3 protein gamma OS=Mus musculus GN=Ywhag PE=1 SV=2	29.737	28.8311	28.2126	27.9757	28.3603	29.3511	29.6289	29.1332	28.6891	29.1183	1.01496	0.403953
tr|Q3TF08|Q3TF08_MOUSE Uncharacterized protein (Fragment) OS=Mus musculus GN=Rbp4 PE=2 SV=1;sp|Q00724|RET4_MOUSE Retinol-binding protein 4 OS=Mus musculus GN=Rbp4 PE=1 SV=2;tr|H7BWY6|H7BWY6_MOUSE Retinol-binding protein 4 OS=Mus musculus GN=Rbp4 PE=1 SV=1	28.7609	29.6352	29.425	29.8667	29.6144	28.7734	28.9058	29.3046	29.422	29.1495	0.990741	0.407166
tr|Q58E61|Q58E61_MOUSE Igh protein OS=Mus musculus GN=Igh PE=2 SV=1;tr|Q4VAB6|Q4VAB6_MOUSE Igh protein OS=Mus musculus GN=Igh PE=2 SV=1	28.1349	26.678	28.6025	26.5859	26.5139	27.4086	27.2674	26.8649	27.5003	27.0137	0.982304	0.409839
sp|P35700|PRDX1_MOUSE Peroxiredoxin-1 OS=Mus musculus GN=Prdx1 PE=1 SV=1;tr|B1AXW5|B1AXW5_MOUSE Peroxiredoxin-1 (Fragment) OS=Mus musculus GN=Prdx1 PE=1 SV=8;tr|B1AXW6|B1AXW6_MOUSE Peroxiredoxin-1 (Fragment) OS=Mus musculus GN=Prdx1 PE=1 SV=1;tr|Q3U9J9|Q3U	29.2564	27.5903	25.981	26.6733	27.0829	28.2578	28.6778	28.2671	27.3752	28.0714	1.02543	0.410628
tr|Q8BMA8|Q8BMA8_MOUSE Uncharacterized protein OS=Mus musculus GN=Eef2 PE=2 SV=1;tr|Q3UMI7|Q3UMI7_MOUSE Uncharacterized protein OS=Mus musculus GN=Eef2 PE=2 SV=1;tr|Q3UDC8|Q3UDC8_MOUSE Uncharacterized protein OS=Mus musculus GN=Eef2 PE=2 SV=1;tr|Q3UBL9|Q3U	28.3359	26.5392	24.3776	25.1919	26.4926	26.2362	27.5348	27.4399	26.1112	26.9259	1.0312	0.412616
sp|O89020|AFAM_MOUSE Afamin OS=Mus musculus GN=Afm PE=1 SV=2	29.6329	29.2834	29.1274	29.2529	29.2839	29.6387	29.4332	29.4019	29.3242	29.4394	1.00393	0.412946
tr|Q545F0|Q545F0_MOUSE MCG3124, isoform CRA_b OS=Mus musculus GN=Mif PE=1 SV=1;sp|P34884|MIF_MOUSE Macrophage migration inhibitory factor OS=Mus musculus GN=Mif PE=1 SV=2	28.1855	26.8105	26.7796	26.5556	26.9404	27.6035	27.7691	27.4673	27.0828	27.4451	1.01338	0.413931
tr|Q6ZWX2|Q6ZWX2_MOUSE Thymosin, beta 4, X chromosome OS=Mus musculus GN=Tmsb4x PE=2 SV=1;sp|P20065|TYB4_MOUSE Thymosin beta-4 OS=Mus musculus GN=Tmsb4x PE=1 SV=1	29.8373	28.7449	28.772	28.4221	29.3023	29.2062	29.3304	29.0197	28.9441	29.2147	1.00935	0.424783
sp|P97298|PEDF_MOUSE Pigment epithelium-derived factor OS=Mus musculus GN=Serpinf1 PE=1 SV=2	29.3557	30.1915	30.1301	29.908	30.0107	29.391	29.4204	29.9114	29.8963	29.6834	0.992876	0.426353
sp|Q99PT1|GDIR1_MOUSE Rho GDP-dissociation inhibitor 1 OS=Mus musculus GN=Arhgdia PE=1 SV=3	28.1837	27.3213	26.8112	26.6328	27.5651	27.3782	27.7696	27.4563	27.2372	27.5423	1.0112	0.426557
tr|Q3TBM1|Q3TBM1_MOUSE Alpha-mannosidase OS=Mus musculus GN=Man2b1 PE=2 SV=1;sp|O09159|MA2B1_MOUSE Lysosomal alpha-mannosidase OS=Mus musculus GN=Man2b1 PE=1 SV=4	25.4613	26.3282	26.7698	26.7272	26.4504	26.1047	25.7319	25.8312	26.3216	26.0295	0.988904	0.42781
tr|Q3U6G1|Q3U6G1_MOUSE Biliverdin reductase B (Flavin reductase (NADPH)) OS=Mus musculus GN=Blvrb PE=1 SV=1;sp|Q923D2|BLVRB_MOUSE Flavin reductase (NADPH) OS=Mus musculus GN=Blvrb PE=1 SV=3;tr|E9PZC3|E9PZC3_MOUSE Flavin reductase (NADPH) OS=Mus musculus GN	30.5115	28.2632	28.6399	28.2762	28.4713	30.4003	29.1087	30.0682	28.9227	29.5121	1.02038	0.429087
sp|P54071|IDHP_MOUSE Isocitrate dehydrogenase [NADP], mitochondrial OS=Mus musculus GN=Idh2 PE=1 SV=3;tr|D6RIL6|D6RIL6_MOUSE Isocitrate dehydrogenase [NADP], mitochondrial OS=Mus musculus GN=Idh2 PE=1 SV=1	27.9639	27.4122	26.734	26.4069	27.0292	26.4745	27.2347	26.4157	27.1292	26.7885	0.987441	0.430325
tr|Q9D8L4|Q9D8L4_MOUSE Uncharacterized protein OS=Mus musculus PE=1 SV=1	30.2505	30.0451	28.7053	28.6737	29.9127	29.4729	30.7279	29.3317	29.4187	29.8613	1.01505	0.433146
sp|P11352|GPX1_MOUSE Glutathione peroxidase 1 OS=Mus musculus GN=Gpx1 PE=1 SV=2;tr|A0A0A6YVV2|A0A0A6YVV2_MOUSE Glutathione peroxidase OS=Mus musculus GN=Gpx1 PE=1 SV=1;tr|A0A0A6YY34|A0A0A6YY34_MOUSE Glutathione peroxidase OS=Mus musculus GN=Gpx1 PE=1 SV=1	28.9572	26.0329	27.3896	25.8363	26.8635	28.4291	27.3981	28.1758	27.054	27.7166	1.02449	0.442798
sp|Q61147|CERU_MOUSE Ceruloplasmin OS=Mus musculus GN=Cp PE=1 SV=2;tr|E9PZD8|E9PZD8_MOUSE Ceruloplasmin OS=Mus musculus GN=Cp PE=1 SV=1;tr|G3X9T8|G3X9T8_MOUSE Ceruloplasmin OS=Mus musculus GN=Cp PE=1 SV=1;tr|G3X8Q5|G3X8Q5_MOUSE Ceruloplasmin OS=Mus musculu	31.285	31.6271	31.6636	31.5215	31.7112	31.6046	31.532	31.5564	31.5243	31.6011	1.00244	0.44559
tr|Q7M754|Q7M754_MOUSE Try10-like trypsinogen OS=Mus musculus GN=Gm5409 PE=2 SV=1;tr|Q792Z1|Q792Z1_MOUSE MCG140784 OS=Mus musculus GN=Try10 PE=1 SV=1	28.3306	29.8912	29.7257	30.0926	29.5836	29.1231	28.6474	29.2708	29.51	29.1562	0.988012	0.457047
tr|Q8C6E3|Q8C6E3_MOUSE Catalase OS=Mus musculus GN=Cat PE=2 SV=1;sp|P24270|CATA_MOUSE Catalase OS=Mus musculus GN=Cat PE=1 SV=4;tr|Q3UZE7|Q3UZE7_MOUSE Catalase OS=Mus musculus GN=Cat PE=2 SV=1;tr|Q3UF58|Q3UF58_MOUSE Catalase OS=Mus musculus GN=Cat PE=2 SV=	29.4681	26.9399	27.7514	25.6112	26.5439	29.3656	28.1859	28.9037	27.4426	28.2498	1.02941	0.457287
tr|Q8CFZ6|Q8CFZ6_MOUSE C-type lectin domain family 3, member b OS=Mus musculus GN=Clec3b PE=1 SV=1;sp|P43025|TETN_MOUSE Tetranectin OS=Mus musculus GN=Clec3b PE=1 SV=2	26.2266	27.7296	27.0923	27.6194	26.7011	26.8726	26.6749	27.271	27.167	26.8799	0.989432	0.466633
sp|P16125|LDHB_MOUSE L-lactate dehydrogenase B chain OS=Mus musculus GN=Ldhb PE=1 SV=2;tr|D3Z7F0|D3Z7F0_MOUSE L-lactate dehydrogenase (Fragment) OS=Mus musculus GN=Ldhb PE=1 SV=1	29.1908	28.5949	27.9485	27.7362	28.1902	28.7962	29.3432	28.4172	28.3676	28.6867	1.01125	0.470989
sp|Q6GQT1|A2MG_MOUSE Alpha-2-macroglobulin-P OS=Mus musculus GN=A2m PE=2 SV=2	28.7416	29.175	29.3021	29.0902	29.2817	28.803	28.6909	28.9918	29.0772	28.9419	0.995345	0.471946
tr|Q5SS40|Q5SS40_MOUSE Tyrosine 3-monooxygenase/tryptophan 5-monooxygenase activation protein, epsilon polypeptide, isoform CRA_c OS=Mus musculus GN=Ywhae PE=1 SV=1;sp|P62259|1433E_MOUSE 14-3-3 protein epsilon OS=Mus musculus GN=Ywhae PE=1 SV=1;tr|Q8BPH1|Q	28.3838	27.5772	26.8159	26.7519	27.0924	27.6551	28.3614	27.8251	27.3822	27.7335	1.01283	0.477237
tr|Q9QYT9|Q9QYT9_MOUSE Major prion protein OS=Mus musculus GN=Prnpb PE=3 SV=1;tr|Q4FJQ7|Q4FJQ7_MOUSE Major prion protein OS=Mus musculus GN=Prnp PE=1 SV=1;tr|Q3UBH0|Q3UBH0_MOUSE Major prion protein OS=Mus musculus GN=Prnp PE=2 SV=1;tr|Q3TZI7|Q3TZI7_MOUSE M	28.4711	29.0001	28.8477	29.241	28.8299	28.7534	28.3564	28.9861	28.89	28.7314	0.994513	0.478483
sp|Q921I1|TRFE_MOUSE Serotransferrin OS=Mus musculus GN=Tf PE=1 SV=1;tr|E9Q035|E9Q035_MOUSE Predicted gene 20425 OS=Mus musculus GN=Gm20425 PE=4 SV=1	35.927	36.7165	36.8915	36.8536	36.7904	36.2888	36.1174	36.3854	36.5972	36.3955	0.994489	0.479865
sp|Q99M71|EPDR1_MOUSE Mammalian ependymin-related protein 1 OS=Mus musculus GN=Epdr1 PE=1 SV=1	26.3028	27.0537	27.0891	26.9116	27.1154	26.5352	26.2324	26.7027	26.8393	26.6464	0.992812	0.485328
sp|Q03517|SCG2_MOUSE Secretogranin-2 OS=Mus musculus GN=Scg2 PE=1 SV=1;tr|Q4W8U9|Q4W8U9_MOUSE Scg2 protein OS=Mus musculus GN=Scg2 PE=1 SV=1	29.3198	29.8872	30.505	30.7266	30.1427	29.589	29.7181	29.9877	30.1096	29.8594	0.991688	0.49134
tr|Q543R4|Q543R4_MOUSE Uncharacterized protein OS=Mus musculus GN=Cpe PE=1 SV=1;sp|Q00493|CBPE_MOUSE Carboxypeptidase E OS=Mus musculus GN=Cpe PE=1 SV=2	27.9482	28.5593	28.2388	28.5866	28.5969	28.4612	28.1703	28.6311	28.3332	28.4649	1.00465	0.500219
sp|P47857|PFKAM_MOUSE ATP-dependent 6-phosphofructokinase, muscle type OS=Mus musculus GN=Pfkm PE=1 SV=3;tr|Q99K08|Q99K08_MOUSE ATP-dependent 6-phosphofructokinase OS=Mus musculus GN=Pfkm PE=2 SV=1	28.3705	27.6714	26.8352	26.4371	26.1327	26.2291	28.0299	27.1666	27.3286	26.8896	0.983936	0.50611
sp|Q9QUR8|SEM7A_MOUSE Semaphorin-7A OS=Mus musculus GN=Sema7a PE=1 SV=1	26.018	26.9189	27.1896	26.8566	26.6994	26.501	26.4237	26.6264	26.7458	26.5626	0.993153	0.508501
sp|O88783|FA5_MOUSE Coagulation factor V OS=Mus musculus GN=F5 PE=1 SV=1	25.369	26.2408	25.6209	26.9429	26.362	25.0584	25.4631	26.0227	26.0434	25.7265	0.987833	0.512602
sp|Q9EPL2|CSTN1_MOUSE Calsyntenin-1 OS=Mus musculus GN=Clstn1 PE=1 SV=1	25.9264	28.3541	28.4114	28.8614	28.2023	27.2385	26.899	27.2294	27.8884	27.3923	0.982212	0.517079
tr|Q3U8F7|Q3U8F7_MOUSE Uncharacterized protein OS=Mus musculus GN=Npc2 PE=2 SV=1;tr|Q3U3C2|Q3U3C2_MOUSE Uncharacterized protein OS=Mus musculus GN=Npc2 PE=2 SV=1;sp|Q9Z0J0|NPC2_MOUSE Epididymal secretory protein E1 OS=Mus musculus GN=Npc2 PE=1 SV=1;tr|Q3TX	26.3297	26.9662	26.8416	26.9395	27.2009	26.3447	26.2172	26.5919	26.7693	26.5887	0.993254	0.520021
tr|Q9DBH3|Q9DBH3_MOUSE Uncharacterized protein OS=Mus musculus GN=Gpld1 PE=2 SV=1;tr|Q8VCU2|Q8VCU2_MOUSE Glycosylphosphatidylinositol specific phospholipase D1 OS=Mus musculus GN=Gpld1 PE=1 SV=1;tr|Q8R432|Q8R432_MOUSE Glycosylphosphatidylinositol phospholi	26.3155	26.5196	26.2353	26.5605	26.6776	26.8576	26.1426	26.4267	26.4077	26.5261	1.00448	0.521844
tr|Q3U5K7|Q3U5K7_MOUSE Cystatin (Fragment) OS=Mus musculus GN=Cst3 PE=2 SV=1;sp|P21460|CYTC_MOUSE Cystatin-C OS=Mus musculus GN=Cst3 PE=1 SV=2;tr|Q9EPX9|Q9EPX9_MOUSE Cystatin OS=Mus musculus GN=Cst3 PE=2 SV=1;tr|A2APX3|A2APX3_MOUSE Cystatin (Fragment) OS=M	33.6274	34.4969	34.5976	34.9042	34.6115	33.7288	33.9131	34.4645	34.4065	34.1795	0.993401	0.5367
tr|Q5FW62|Q5FW62_MOUSE Serine (Or cysteine) peptidase inhibitor, clade D, member 1 OS=Mus musculus GN=Serpind1 PE=2 SV=1;sp|P49182|HEP2_MOUSE Heparin cofactor 2 OS=Mus musculus GN=Serpind1 PE=1 SV=1	27.0992	27.8494	27.5124	27.4872	27.5642	27.3265	27.0817	27.4888	27.4871	27.3653	0.995571	0.53889
tr|Q3TJ94|Q3TJ94_MOUSE Prothrombin OS=Mus musculus GN=F2 PE=1 SV=1;sp|P19221|THRB_MOUSE Prothrombin OS=Mus musculus GN=F2 PE=1 SV=1;tr|H7BX99|H7BX99_MOUSE Prothrombin OS=Mus musculus GN=F2 PE=1 SV=1	29.3593	29.8205	29.6558	29.5597	29.8199	29.7979	29.4485	29.6631	29.5988	29.6824	1.00282	0.540221
tr|Q5FWB7|Q5FWB7_MOUSE Fructose-bisphosphate aldolase OS=Mus musculus GN=Aldoa PE=1 SV=1;sp|P05064|ALDOA_MOUSE Fructose-bisphosphate aldolase A OS=Mus musculus GN=Aldoa PE=1 SV=2;tr|Q6NY00|Q6NY00_MOUSE Fructose-bisphosphate aldolase OS=Mus musculus GN=Aldo	34.898	34.2586	33.307	32.9746	33.007	33.2086	34.1281	33.7878	33.8596	33.5329	0.990352	0.545851
sp|P19157|GSTP1_MOUSE Glutathione S-transferase P 1 OS=Mus musculus GN=Gstp1 PE=1 SV=2;sp|P46425|GSTP2_MOUSE Glutathione S-transferase P 2 OS=Mus musculus GN=Gstp2 PE=1 SV=2;tr|K9JA74|K9JA74_MOUSE Glutathione S-transferase pi 2 (Fragment) OS=Mus musculus G	28.3353	28.3024	27.4468	27.6705	28.0714	27.8124	28.2637	28.2378	27.9388	28.0963	1.00564	0.547239
sp|P21550|ENOB_MOUSE Beta-enolase OS=Mus musculus GN=Eno3 PE=1 SV=3;tr|Q4FK59|Q4FK59_MOUSE Eno3 protein OS=Mus musculus GN=Eno3 PE=2 SV=1;tr|Q5SX59|Q5SX59_MOUSE Beta-enolase (Fragment) OS=Mus musculus GN=Eno3 PE=1 SV=1	33.7607	32.2169	32.0214	31.6439	31.3852	31.7457	32.6726	32.4712	32.4107	32.0687	0.989447	0.560416
sp|P00920|CAH2_MOUSE Carbonic anhydrase 2 OS=Mus musculus GN=Ca2 PE=1 SV=4	32.6406	30.6157	31.5492	30.5747	30.8302	32.4543	31.4074	32.177	31.345	31.7172	1.01187	0.564908
sp|P51885|LUM_MOUSE Lumican OS=Mus musculus GN=Lum PE=1 SV=2	30.5871	30.9391	30.1669	30.1331	30.3932	30.0599	30.5081	30.3502	30.4565	30.3279	0.995775	0.568955
sp|Q99LX0|PARK7_MOUSE Protein/nucleic acid deglycase DJ-1 OS=Mus musculus GN=Park7 PE=1 SV=1;tr|A2A813|A2A813_MOUSE Protein/nucleic acid deglycase DJ-1 OS=Mus musculus GN=Park7 PE=1 SV=1;tr|A2A815|A2A815_MOUSE Protein/nucleic acid deglycase DJ-1 (Fragment)	29.6526	28.0335	26.9989	27.2337	27.8765	28.4931	28.3559	28.6814	27.9797	28.3518	1.0133	0.572862
tr|Q8CB17|Q8CB17_MOUSE Uncharacterized protein OS=Mus musculus GN=Fetub PE=2 SV=1;sp|Q9QXC1|FETUB_MOUSE Fetuin-B OS=Mus musculus GN=Fetub PE=1 SV=1;tr|Q6YJU2|Q6YJU2_MOUSE GUGU alpha OS=Mus musculus GN=Fetub PE=2 SV=1;tr|Q6YJU1|Q6YJU1_MOUSE Fetuin-B OS=Mus	28.6451	29.403	29.0346	29.3551	29.2807	28.9386	28.9399	28.8009	29.1094	28.99	0.995897	0.577293
sp|P52480|KPYM_MOUSE Pyruvate kinase PKM OS=Mus musculus GN=Pkm PE=1 SV=4;tr|A0A1L1SU37|A0A1L1SU37_MOUSE Pyruvate kinase PKM (Fragment) OS=Mus musculus GN=Pkm PE=1 SV=1	32.4281	31.9807	31.3809	31.2794	31.2301	31.1651	32.0796	31.7971	31.7673	31.568	0.993725	0.588496
sp|Q61129|CFAI_MOUSE Complement factor I OS=Mus musculus GN=Cfi PE=1 SV=3	28.5508	28.7692	28.5671	28.5248	28.821	28.7455	28.4681	28.5936	28.603	28.6571	1.00189	0.596208
tr|B2RWX2|B2RWX2_MOUSE Complement component 4B (Childo blood group) OS=Mus musculus GN=C4b PE=2 SV=1;sp|P01029|CO4B_MOUSE Complement C4-B OS=Mus musculus GN=C4b PE=1 SV=3;tr|B2RXW7|B2RXW7_MOUSE Complement component 4B (Childo blood group) OS=Mus musculus G	29.9857	30.3641	30.5806	30.6706	30.7574	30.6768	30.2215	30.3832	30.4002	30.5097	1.0036	0.599031
sp|Q01339|APOH_MOUSE Beta-2-glycoprotein 1 OS=Mus musculus GN=Apoh PE=1 SV=1;tr|Q6LAL7|Q6LAL7_MOUSE Beta-2 glycoprotein I (Fragment) OS=Mus musculus PE=4 SV=1;tr|Q9CY42|Q9CY42_MOUSE Uncharacterized protein OS=Mus musculus GN=Apoh PE=2 SV=1	29.562	30.5178	29.8447	30.4394	30.3275	29.7373	29.6407	30.0503	30.0909	29.9389	0.994948	0.606061
sp|Q9CZU6|CISY_MOUSE Citrate synthase, mitochondrial OS=Mus musculus GN=Cs PE=1 SV=1;tr|Q0QEL9|Q0QEL9_MOUSE Citrate synthase (Fragment) OS=Mus musculus GN=Cs PE=2 SV=1	27.3077	26.6388	26.9256	25.6676	26.6192	25.9974	26.9488	26.0806	26.6349	26.4115	0.991613	0.611361
tr|B8JJN0|B8JJN0_MOUSE Predicted gene 20547 OS=Mus musculus GN=Gm20547 PE=3 SV=1;tr|F6VQX8|F6VQX8_MOUSE Predicted gene 20547 (Fragment) OS=Mus musculus GN=Gm20547 PE=3 SV=1;tr|Q3UEG8|Q3UEG8_MOUSE Complement factor B, isoform CRA_a OS=Mus musculus GN=Cfb PE	29.1974	30.0671	30.061	29.795	29.8161	29.5446	29.3554	29.8989	29.7801	29.6537	0.995756	0.616709
tr|I6L985|I6L985_MOUSE Igh protein OS=Mus musculus GN=Igh PE=1 SV=1;tr|A0A075B5P4|A0A075B5P4_MOUSE Ig gamma-1 chain C region secreted form (Fragment) OS=Mus musculus GN=Ighg1 PE=1 SV=1;tr|A0A0A6YWR2|A0A0A6YWR2_MOUSE Ig gamma-1 chain C region secreted form	28.6848	29.7309	29.0175	30.4016	29.6564	29.5414	28.7794	29.0315	29.4587	29.2522	0.99299	0.652144
sp|P97447|FHL1_MOUSE Four and a half LIM domains protein 1 OS=Mus musculus GN=Fhl1 PE=1 SV=3;tr|A2AEX8|A2AEX8_MOUSE Four and a half LIM domains 1, isoform CRA_b OS=Mus musculus GN=Fhl1 PE=1 SV=1;tr|A2AEX6|A2AEX6_MOUSE Four and a half LIM domains protein 1	31.6784	29.7283	29.6793	29.104	28.8174	29.0619	31.1693	29.7088	30.0475	29.6894	0.988081	0.658621
sp|Q9WUB3|PYGM_MOUSE Glycogen phosphorylase, muscle form OS=Mus musculus GN=Pygm PE=1 SV=3;tr|E9PUM3|E9PUM3_MOUSE Alpha-1,4 glucan phosphorylase OS=Mus musculus GN=Pygm PE=1 SV=1	32.7616	31.9439	31.0115	30.7705	30.8168	30.95	32.2253	31.4771	31.6218	31.3673	0.99195	0.663851
sp|Q9DAK9|PHP14_MOUSE 14 kDa phosphohistidine phosphatase OS=Mus musculus GN=Phpt1 PE=1 SV=1	27.8309	26.5735	26.0313	26.2051	25.5828	26.2344	26.8083	27.071	26.6602	26.4241	0.991144	0.667927
tr|A0A075B5P3|A0A075B5P3_MOUSE Immunoglobulin heavy constant gamma 2B (Fragment) OS=Mus musculus GN=Ighg2b PE=1 SV=1;tr|A0A0A6YVP0|A0A0A6YVP0_MOUSE Immunoglobulin heavy constant gamma 2B (Fragment) OS=Mus musculus GN=Ighg2b PE=1 SV=2;tr|A0A0F7R1P3|A0A0F7R1	32.2711	30.704	31.0727	30.9822	31.2111	31.2301	31.8437	31.4187	31.2575	31.4259	1.00539	0.670536
sp|P01887|B2MG_MOUSE Beta-2-microglobulin OS=Mus musculus GN=B2m PE=1 SV=2;tr|Q9D239|Q9D239_MOUSE Beta-2-microglobulin OS=Mus musculus GN=B2m PE=2 SV=1;tr|Q3U679|Q3U679_MOUSE Beta-2-microglobulin OS=Mus musculus GN=B2m PE=2 SV=1;tr|Q91Z73|Q91Z73_MOUSE Beta	28.4268	29.1118	29.2926	29.2833	29.3857	28.9865	28.9214	29.216	29.0286	29.1274	1.0034	0.683873
sp|P21614|VTDB_MOUSE Vitamin D-binding protein OS=Mus musculus GN=Gc PE=1 SV=2	32.6831	33.4529	33.1276	33.3159	33.2916	33.121	33.0522	33.4233	33.1449	33.222	1.00233	0.695129
tr|Q3UKR1|Q3UKR1_MOUSE Decorin OS=Mus musculus GN=Dcn PE=1 SV=1;sp|P28654|PGS2_MOUSE Decorin OS=Mus musculus GN=Dcn PE=1 SV=1;tr|Q3TSV1|Q3TSV1_MOUSE Decorin OS=Mus musculus GN=Dcn PE=2 SV=1	28.3927	28.2809	28.3009	28.2109	28.9843	28.0221	28.6383	27.9513	28.2963	28.399	1.00363	0.697305
tr|Q3UBP0|Q3UBP0_MOUSE Adenylosuccinate synthetase isozyme 1 OS=Mus musculus GN=Adssl1 PE=2 SV=1;sp|P28650|PURA1_MOUSE Adenylosuccinate synthetase isozyme 1 OS=Mus musculus GN=Adssl1 PE=1 SV=2;tr|J3QN31|J3QN31_MOUSE Adenylosuccinate synthetase isozyme 1 OS	28.9177	28.0684	27.9498	26.732	27.0072	27.1882	28.6429	27.8791	27.917	27.6793	0.991489	0.698177
tr|Q546G4|Q546G4_MOUSE Albumin 1 OS=Mus musculus GN=Alb PE=1 SV=1;sp|P07724|ALBU_MOUSE Serum albumin OS=Mus musculus GN=Alb PE=1 SV=3	38.5621	39.1128	39.1036	39.2997	39.257	38.8561	38.7072	38.9382	39.0196	38.9396	0.997951	0.698849
sp|P03977|KV3A4_MOUSE Ig kappa chain V-III region 50S10.1 OS=Mus musculus PE=1 SV=1;sp|P01656|KV3A3_MOUSE Ig kappa chain V-III region MOPC 70 OS=Mus musculus PE=1 SV=1;sp|P01654|KV3A1_MOUSE Ig kappa chain V-III region PC 2880/PC 1229 OS=Mus musculus PE=1 S	26.6071	26.897	25.7375	25.9336	25.5083	25.3804	26.8409	26.6893	26.2938	26.1047	0.992809	0.702172
tr|Q5NCI4|Q5NCI4_MOUSE Phosphoglycerate mutase OS=Mus musculus GN=Pgam2 PE=1 SV=1;sp|O70250|PGAM2_MOUSE Phosphoglycerate mutase 2 OS=Mus musculus GN=Pgam2 PE=1 SV=3	32.2991	31.5517	30.9339	30.5203	30.6746	30.4915	31.6905	31.6517	31.3263	31.1271	0.993641	0.704243
tr|Q5RJV4|Q5RJV4_MOUSE Phosphoglucomutase 2 OS=Mus musculus GN=Pgm2 PE=2 SV=1;sp|Q9D0F9|PGM1_MOUSE Phosphoglucomutase-1 OS=Mus musculus GN=Pgm1 PE=1 SV=4;tr|Q7TNU0|Q7TNU0_MOUSE Pgm2 protein (Fragment) OS=Mus musculus GN=Pgm2 PE=2 SV=1;tr|Q66JR7|Q66JR7_MOUS	30.9646	29.6447	29.3819	28.7965	29.4362	29.6015	30.2457	30.3121	29.6969	29.8989	1.0068	0.705451
sp|P11589|MUP2_MOUSE Major urinary protein 2 OS=Mus musculus GN=Mup2 PE=1 SV=1;tr|Q8JZT0|Q8JZT0_MOUSE Mup1 protein OS=Mus musculus PE=2 SV=1	29.7602	31.7886	31.3687	31.4559	32.0376	31.0537	30.7358	31.3832	31.0934	31.3026	1.00673	0.707814
tr|Q3U0Z1|Q3U0Z1_MOUSE Uncharacterized protein OS=Mus musculus GN=Coch PE=2 SV=1;sp|Q62507|COCH_MOUSE Cochlin OS=Mus musculus GN=Coch PE=1 SV=2	28.21	27.398	27.8567	28.3105	27.4755	27.0855	28.4746	28.1654	27.9438	27.8002	0.994863	0.717241
tr|Q5EBJ0|Q5EBJ0_MOUSE Fatty acid binding protein 3, muscle and heart OS=Mus musculus GN=Fabp3 PE=1 SV=1;sp|P11404|FABPH_MOUSE Fatty acid-binding protein, heart OS=Mus musculus GN=Fabp3 PE=1 SV=5	31.7101	30.9352	30.2346	29.8966	30.341	30.102	31.6059	31.5854	30.6941	30.9086	1.00699	0.718196
sp|P70232|NCHL1_MOUSE Neural cell adhesion molecule L1-like protein OS=Mus musculus GN=Chl1 PE=1 SV=2	25.9119	28.3769	27.9809	28.8926	28.1656	27.4523	26.8768	27.611	27.7905	27.5264	0.990496	0.720861
sp|P14152|MDHC_MOUSE Malate dehydrogenase, cytoplasmic OS=Mus musculus GN=Mdh1 PE=1 SV=3	31.8123	30.9172	30.6725	30.055	30.5784	30.6834	31.6771	31.1723	30.8643	31.0278	1.0053	0.724797
tr|Q9D1R6|Q9D1R6_MOUSE Uncharacterized protein OS=Mus musculus GN=Tpm2 PE=2 SV=1;sp|P58774|TPM2_MOUSE Tropomyosin beta chain OS=Mus musculus GN=Tpm2 PE=1 SV=1;tr|Q61344|Q61344_MOUSE Beta-tropomyosin OS=Mus musculus GN=Tpm2 PE=2 SV=1;tr|A2AIM4|A2AIM4_MOUSE	27.9041	26.1475	26.6278	25.0898	26.2369	25.7079	26.9056	26.0099	26.4423	26.2151	0.991407	0.7334
sp|P17751|TPIS_MOUSE Triosephosphate isomerase OS=Mus musculus GN=Tpi1 PE=1 SV=4;tr|H7BXC3|H7BXC3_MOUSE Triosephosphate isomerase OS=Mus musculus GN=Tpi1 PE=1 SV=1	33.4241	32.5068	32.0791	31.6101	31.8766	31.9273	32.6438	32.5577	32.4051	32.2513	0.995257	0.736429
sp|P48036|ANXA5_MOUSE Annexin A5 OS=Mus musculus GN=Anxa5 PE=1 SV=1	27.4945	28.4423	27.736	27.1309	28.3126	27.346	28.5746	27.1607	27.7009	27.8485	1.00533	0.751996
tr|B7ZNS9|B7ZNS9_MOUSE Cfd protein OS=Mus musculus GN=Cfd PE=2 SV=1;tr|Q3UP47|Q3UP47_MOUSE Complement factor D (Adipsin) OS=Mus musculus GN=Cfd PE=2 SV=1;sp|P03953|CFAD_MOUSE Complement factor D OS=Mus musculus GN=Cfd PE=1 SV=1	29.0714	28.286	27.6497	28.2849	28.0834	28.5817	28.2957	27.9057	28.323	28.2166	0.996245	0.754851
sp|P16015|CAH3_MOUSE Carbonic anhydrase 3 OS=Mus musculus GN=Ca3 PE=1 SV=3	33.4265	31.7762	31.6837	30.9977	31.9687	31.5261	31.2885	32.3897	31.971	31.7932	0.994439	0.765682
tr|Q3UBR4|Q3UBR4_MOUSE Uncharacterized protein OS=Mus musculus GN=Ctss PE=2 SV=1;sp|O70370|CATS_MOUSE Cathepsin S OS=Mus musculus GN=Ctss PE=1 SV=2;tr|F6WR04|F6WR04_MOUSE Cathepsin S OS=Mus musculus GN=Ctss PE=1 SV=1;tr|Q8BSZ5|Q8BSZ5_MOUSE Cathepsin S OS=M	29.0897	29.874	30.0989	30.1298	30.0885	29.8592	29.6712	29.8927	29.7981	29.8779	1.00268	0.7671
tr|A0A077S2U6|A0A077S2U6_MOUSE Lysozyme OS=Mus musculus GN=Lyz2 PE=1 SV=1;sp|P08905|LYZ2_MOUSE Lysozyme C-2 OS=Mus musculus GN=Lyz2 PE=1 SV=2	28.3871	29.3224	29.5822	29.5225	30.012	29.0423	28.9471	29.2473	29.2036	29.3122	1.00372	0.777886
tr|Q543J5|Q543J5_MOUSE Antithrombin OS=Mus musculus GN=Serpinc1 PE=1 SV=1;sp|P32261|ANT3_MOUSE Antithrombin-III OS=Mus musculus GN=Serpinc1 PE=1 SV=1;tr|A0A0A6YWH7|A0A0A6YWH7_MOUSE Antithrombin-III (Fragment) OS=Mus musculus GN=Serpinc1 PE=1 SV=1	30.8304	31.2805	31.2505	31.1734	31.1648	31.2025	31.0112	31.2912	31.1337	31.1674	1.00108	0.786153
sp|P08228|SODC_MOUSE Superoxide dismutase [Cu-Zn] OS=Mus musculus GN=Sod1 PE=1 SV=2	31.9517	30.6946	31.1081	30.7045	31.2283	31.3885	31.0142	31.1521	31.1148	31.1958	1.0026	0.799622
tr|A0A0R4J038|A0A0R4J038_MOUSE Kininogen-1 OS=Mus musculus GN=Kng1 PE=1 SV=1;sp|O08677|KNG1_MOUSE Kininogen-1 OS=Mus musculus GN=Kng1 PE=1 SV=1;tr|D3YTY9|D3YTY9_MOUSE Kininogen-1 OS=Mus musculus GN=Kng1 PE=1 SV=1	31.769	32.3344	32.0227	32.3357	32.3628	32.0127	32.128	32.1065	32.1155	32.1525	1.00115	0.820139
sp|P23953|EST1C_MOUSE Carboxylesterase 1C OS=Mus musculus GN=Ces1c PE=1 SV=4	32.5487	32.5736	32.4884	32.6148	32.22	32.6569	32.6776	32.5739	32.5564	32.5321	0.999253	0.831912
sp|P06745|G6PI_MOUSE Glucose-6-phosphate isomerase OS=Mus musculus GN=Gpi PE=1 SV=4;tr|B7ZWL9|B7ZWL9_MOUSE Glucose-6-phosphate isomerase OS=Mus musculus GN=Gpi1 PE=2 SV=1;tr|B2RXT5|B2RXT5_MOUSE Glucose-6-phosphate isomerase OS=Mus musculus GN=Gpi1 PE=2 SV=	30.9895	29.9368	29.6495	29.1902	29.4409	29.5802	30.3717	29.987	29.9415	29.845	0.996776	0.832058
sp|Q64726|ZA2G_MOUSE Zinc-alpha-2-glycoprotein OS=Mus musculus GN=Azgp1 PE=1 SV=2	27.526	28.3437	28.0161	28.2445	28.2359	27.9938	27.8567	28.2214	28.0326	28.077	1.00158	0.835141
tr|Q5EBQ2|Q5EBQ2_MOUSE MCG7941, isoform CRA_f OS=Mus musculus GN=Pebp1 PE=1 SV=1;tr|Q3TGC5|Q3TGC5_MOUSE Uncharacterized protein OS=Mus musculus GN=Pebp1 PE=2 SV=1;sp|P70296|PEBP1_MOUSE Phosphatidylethanolamine-binding protein 1 OS=Mus musculus GN=Pebp1 PE=	30.4726	29.6976	29.4183	29.3596	29.4322	29.7072	29.9117	30.143	29.737	29.7985	1.00207	0.842906
sp|Q9R1E6|ENPP2_MOUSE Ectonucleotide pyrophosphatase/phosphodiesterase family member 2 OS=Mus musculus GN=Enpp2 PE=1 SV=3;tr|G3UXY9|G3UXY9_MOUSE Ectonucleotide pyrophosphatase/phosphodiesterase family member 2 OS=Mus musculus GN=Enpp2 PE=1 SV=1	33.3227	34.4526	34.5789	34.5602	34.3815	33.7698	34.1249	34.3704	34.2286	34.1616	0.998044	0.848375
tr|Q61482|Q61482_MOUSE CDE1-binding protein CDEBP OS=Mus musculus GN=Aplp2 PE=4 SV=1;tr|Q60709|Q60709_MOUSE Amyloid-like protein 2 OS=Mus musculus GN=Aplp2 PE=1 SV=1;tr|Q3UDL6|Q3UDL6_MOUSE Uncharacterized protein OS=Mus musculus GN=Aplp2 PE=2 SV=1;tr|A0A1L	25.0461	28.3211	28.077	28.3321	28.1747	27.3337	27.5023	27.421	27.4441	27.608	1.00597	0.848955
tr|Q544Y8|Q544Y8_MOUSE Granulin OS=Mus musculus GN=Grn PE=2 SV=1;tr|Q3UC19|Q3UC19_MOUSE Uncharacterized protein OS=Mus musculus GN=Grn PE=2 SV=1;tr|Q3TX66|Q3TX66_MOUSE Uncharacterized protein OS=Mus musculus GN=Grn PE=2 SV=1;tr|Q3TWT4|Q3TWT4_MOUSE Uncharac	25.5234	25.7913	26.1158	25.8272	26.4849	25.6547	25.659	25.6474	25.8144	25.8615	1.00182	0.851281
sp|P08249|MDHM_MOUSE Malate dehydrogenase, mitochondrial OS=Mus musculus GN=Mdh2 PE=1 SV=3	29.2514	28.369	28.4109	27.2718	28.3125	27.8263	28.7368	28.0799	28.3258	28.2389	0.996933	0.85314
tr|Q3UH37|Q3UH37_MOUSE Uncharacterized protein OS=Mus musculus GN=Nptxr PE=2 SV=1;tr|B9EIV5|B9EIV5_MOUSE Neuronal pentraxin receptor OS=Mus musculus GN=Nptxr PE=2 SV=1;tr|F7BX42|F7BX42_MOUSE Neuronal pentraxin receptor OS=Mus musculus GN=Nptxr PE=1 SV=1;tr	27.2684	28.1869	28.3869	28.3651	28.5232	27.8951	27.7291	28.3035	28.0518	28.1127	1.00217	0.856109
tr|Q548W7|Q548W7_MOUSE Diazepam binding inhibitor OS=Mus musculus GN=Dbi PE=1 SV=1;tr|Q3ULV8|Q3ULV8_MOUSE Uncharacterized protein OS=Mus musculus GN=Dbi PE=2 SV=1;sp|P31786|ACBP_MOUSE Acyl-CoA-binding protein OS=Mus musculus GN=Dbi PE=1 SV=2;tr|M0QWU8|M0QW	28.9862	27.7748	28.179	27.4498	27.9706	28.0722	28.3617	28.2434	28.0974	28.162	1.0023	0.856955
tr|Q9D0C0|Q9D0C0_MOUSE Uncharacterized protein OS=Mus musculus GN=Ctsl PE=2 SV=1;tr|Q543M3|Q543M3_MOUSE Cathepsin L OS=Mus musculus GN=Ctsl PE=1 SV=1;tr|Q3UHZ4|Q3UHZ4_MOUSE Uncharacterized protein OS=Mus musculus GN=Ctsl PE=2 SV=1;tr|Q3U5U9|Q3U5U9_MOUSE Un	27.6307	28.431	28.6918	28.6024	28.9176	28.1929	28.2262	28.2272	28.339	28.3909	1.00183	0.867815
tr|Q3U6E4|Q3U6E4_MOUSE Uncharacterized protein OS=Mus musculus GN=Ptma PE=2 SV=1;tr|Q0VGU2|Q0VGU2_MOUSE Prothymosin alpha OS=Mus musculus GN=Ptma PE=1 SV=1;sp|P26350|PTMA_MOUSE Prothymosin alpha OS=Mus musculus GN=Ptma PE=1 SV=2;tr|Q8CAQ5|Q8CAQ5_MOUSE MCG1	26.0971	26.7223	26.5737	26.0893	27.0934	26.2067	26.0328	26.3385	26.3706	26.4178	1.00179	0.873853
sp|Q9R0Y5|KAD1_MOUSE Adenylate kinase isoenzyme 1 OS=Mus musculus GN=Ak1 PE=1 SV=1	31.4654	30.438	29.6517	29.6816	30.017	29.793	30.4139	30.7006	30.3092	30.2311	0.997425	0.874051
tr|Q542G9|Q542G9_MOUSE Annexin OS=Mus musculus GN=Anxa2 PE=1 SV=1;sp|P07356|ANXA2_MOUSE Annexin A2 OS=Mus musculus GN=Anxa2 PE=1 SV=2;tr|Q9CZI7|Q9CZI7_MOUSE Annexin OS=Mus musculus GN=Anxa2 PE=2 SV=1;tr|Q3UCD3|Q3UCD3_MOUSE Annexin OS=Mus musculus GN=Anxa2	27.8141	28.6681	28.0288	27.5339	28.3615	27.5897	28.226	27.669	28.0112	27.9616	0.998226	0.877886
tr|A2RTA0|A2RTA0_MOUSE Creatine kinase, muscle OS=Mus musculus GN=Ckm PE=1 SV=1;sp|P07310|KCRM_MOUSE Creatine kinase M-type OS=Mus musculus GN=Ckm PE=1 SV=1;tr|Q9D6U7|Q9D6U7_MOUSE Uncharacterized protein OS=Mus musculus GN=Ckm PE=2 SV=1	35.349	34.7324	33.3662	33.5605	33.8353	34.0539	34.7621	34.6924	34.252	34.3359	1.00245	0.878757
tr|E0CXN5|E0CXN5_MOUSE Glycerol-3-phosphate dehydrogenase [NAD(+)] OS=Mus musculus GN=Gpd1 PE=1 SV=1;sp|P13707|GPDA_MOUSE Glycerol-3-phosphate dehydrogenase [NAD(+)], cytoplasmic OS=Mus musculus GN=Gpd1 PE=1 SV=3	28.9633	27.6355	27.3567	25.4991	26.6621	26.6317	27.7548	27.9295	27.3637	27.2445	0.995646	0.885556
tr|Q5FWJ3|Q5FWJ3_MOUSE Vimentin OS=Mus musculus GN=Vim PE=1 SV=1;tr|Q3U6S1|Q3U6S1_MOUSE Uncharacterized protein OS=Mus musculus GN=Vim PE=2 SV=1;sp|P20152|VIME_MOUSE Vimentin OS=Mus musculus GN=Vim PE=1 SV=3;tr|Q3V2S4|Q3V2S4_MOUSE Uncharacterized protein O	30.1021	29.8026	28.2728	29.2144	29.332	28.9914	29.4877	29.3311	29.348	29.2855	0.997873	0.885757
sp|Q07797|LG3BP_MOUSE Galectin-3-binding protein OS=Mus musculus GN=Lgals3bp PE=1 SV=1	25.9102	26.1805	26.4582	26.0504	26.2171	26.2291	25.9116	26.3265	26.1498	26.1711	1.00081	0.889921
sp|Q99KI0|ACON_MOUSE Aconitate hydratase, mitochondrial OS=Mus musculus GN=Aco2 PE=1 SV=1	29.1436	28.5693	28.4501	27.0675	28.6105	27.9538	28.8104	28.0889	28.3076	28.3659	1.00206	0.908413
tr|Q3UVB1|Q3UVB1_MOUSE Myoglobin OS=Mus musculus GN=Mb PE=1 SV=1;sp|P04247|MYG_MOUSE Myoglobin OS=Mus musculus GN=Mb PE=1 SV=3	34.1844	33.3754	33.0328	32.8598	33.1488	32.6161	34.0016	33.8773	33.3631	33.4109	1.00143	0.916606
tr|Q564E2|Q564E2_MOUSE L-lactate dehydrogenase OS=Mus musculus GN=Ldha PE=1 SV=1;sp|P06151|LDHA_MOUSE L-lactate dehydrogenase A chain OS=Mus musculus GN=Ldha PE=1 SV=3;tr|Q3TI99|Q3TI99_MOUSE L-lactate dehydrogenase OS=Mus musculus GN=Ldha PE=2 SV=1;tr|Q3TC	32.0717	31.0899	30.6282	30.1315	30.6809	30.629	31.4994	31.2609	30.9803	31.0175	1.0012	0.938892
sp|P09411|PGK1_MOUSE Phosphoglycerate kinase 1 OS=Mus musculus GN=Pgk1 PE=1 SV=4;tr|S4R2M7|S4R2M7_MOUSE Phosphoglycerate kinase OS=Mus musculus GN=Pgk1 PE=1 SV=1	31.4465	30.5858	30.4362	29.995	30.3102	30.2475	30.9105	30.9158	30.6158	30.596	0.999352	0.957272
sp|Q8R429|AT2A1_MOUSE Sarcoplasmic/endoplasmic reticulum calcium ATPase 1 OS=Mus musculus GN=Atp2a1 PE=1 SV=1	29.2213	27.8204	27.5247	26.759	28.7075	26.7387	28.1746	27.7894	27.8313	27.8525	1.00076	0.975481
tr|E9Q5L2|E9Q5L2_MOUSE Inter alpha-trypsin inhibitor, heavy chain 4 OS=Mus musculus GN=Itih4 PE=1 SV=1;tr|E9PVD2|E9PVD2_MOUSE Inter alpha-trypsin inhibitor, heavy chain 4 OS=Mus musculus GN=Itih4 PE=1 SV=1;sp|A6X935|ITIH4_MOUSE Inter alpha-trypsin inhibito	27.1284	26.7823	26.7913	25.4355	26.5676	25.5133	27.0954	26.9946	26.5344	26.5427	1.00031	0.987752
sp|Q5SX40|MYH1_MOUSE Myosin-1 OS=Mus musculus GN=Myh1 PE=1 SV=1;tr|B2RWX0|B2RWX0_MOUSE Myosin, heavy polypeptide 1, skeletal muscle, adult OS=Mus musculus GN=Myh1 PE=2 SV=1	29.9285	27.632	27.5847	24.715	28.5563	25.6809	28.5506	27.1393	27.4651	27.4818	1.00061	0.989937
tr|Q5NC82|Q5NC82_MOUSE Nucleoside diphosphate kinase OS=Mus musculus GN=Nme2 PE=2 SV=1;sp|Q01768|NDKB_MOUSE Nucleoside diphosphate kinase B OS=Mus musculus GN=Nme2 PE=1 SV=1;tr|E9PZF0|E9PZF0_MOUSE Nucleoside diphosphate kinase OS=Mus musculus GN=Gm20390 PE	30.2208	29.1524	28.6709	27.676	28.287	28.9264	29.3575	29.1795	28.93	28.9376	1.00026	0.989969
sp|Q60590|A1AG1_MOUSE Alpha-1-acid glycoprotein 1 OS=Mus musculus GN=Orm1 PE=1 SV=1;tr|Q91X23|Q91X23_MOUSE Alpha-1-acid glycoprotein OS=Mus musculus GN=Orm1 PE=2 SV=1;tr|Q61613|Q61613_MOUSE Alpha-1-acid glycoprotein (AGP) (Fragment) OS=Mus musculus GN=Orm1	29.1916	29.2189	29.8201	29.466	29.1617	29.6656	29.3319	29.545	29.4241	29.426	1.00006	0.992153
tr|Q3UWS9|Q3UWS9_MOUSE Uncharacterized protein (Fragment) OS=Mus musculus GN=Prdx5 PE=2 SV=1;tr|Q3U7H9|Q3U7H9_MOUSE Uncharacterized protein (Fragment) OS=Mus musculus GN=Prdx5 PE=2 SV=1;sp|P99029|PRDX5_MOUSE Peroxiredoxin-5, mitochondrial OS=Mus musculus G	26.5681	26.4114	25.1427	25.8691	25.8344	25.3329	26.7598	26.053	25.9978	25.995	0.999893	0.995126
tr|Q5U415|Q5U415_MOUSE Aldo-keto reductase family 1, member B3 (Aldose reductase) OS=Mus musculus GN=Akr1b3 PE=2 SV=1;tr|Q3UDY1|Q3UDY1_MOUSE MCG6067, isoform CRA_b OS=Mus musculus GN=Akr1b3 PE=1 SV=1;sp|P45376|ALDR_MOUSE Aldose reductase OS=Mus musculus GN	30.0392	29.1441	29.1237	28.4775	29.1311	28.7709	29.4251	29.4591	29.1961	29.1965	1.00001	0.999113

## Sheet: AppNL-F vs AppNL-G-F
Supplementary Table 2: Alterations in proteins identifed in all samples of AppNL-F/NL-F vs AppNL-G-F/NL-G-F
Uniprot ID and Protein Name	log2 of LFQ intensity (AppNL-F/NL-F 1)	log2 of LFQ intensity (AppNL-F/NL-F 2)	log2 of LFQ intensity (AppNL-F/NL-F 3)	log2 of LFQ intensity (AppNL-F/NL-F 4)	Log2 of LFQ intensity (AppNL-G-F/NL-G-F 1)	Log2 of LFQ intensity (AppNL-G-F/NL-G-F 2)	Log2 of LFQ intensity (AppNL-G-F/NL-G-F 3)	Log2 of LFQ intensity (AppNL-G-F/NL-G-F 4)	Average Appwt/wt	Average AppNL-G-F/NL-G-F	Ratio AppNL-F/NL-F/AppNL-G-F/NL-G-F	P-value
tr|G3X8T9|G3X8T9_MOUSE Serine (Or cysteine) peptidase inhibitor, clade A, member 3N, isoform CRA_a OS=Mus musculus GN=Serpina3n PE=1 SV=1	27.5245	27.5994	27.3921	27.2879	28.3895	28.2079	28.0269	28.2714	27.451	28.2239	0.972613	0.000282974
sp|P51885|LUM_MOUSE Lumican OS=Mus musculus GN=Lum PE=1 SV=2	31.842	31.0905	31.5113	31.1807	30.3932	30.0599	30.5081	30.3502	31.4061	30.3279	1.03555	0.0015087
sp|P11087|CO1A1_MOUSE Collagen alpha-1(I) chain OS=Mus musculus GN=Col1a1 PE=1 SV=4;tr|Q99LL6|Q99LL6_MOUSE Col1a1 protein (Fragment) OS=Mus musculus GN=Col1a1 PE=2 SV=1	29.2817	28.8432	29.0658	28.4898	27.8592	26.7028	27.4126	27.4409	28.9201	27.3539	1.05726	0.00176584
tr|Q3TVS6|Q3TVS6_MOUSE Uncharacterized protein OS=Mus musculus GN=Ctsb PE=2 SV=1;sp|P10605|CATB_MOUSE Cathepsin B OS=Mus musculus GN=Ctsb PE=1 SV=2;tr|Q3TC17|Q3TC17_MOUSE Uncharacterized protein OS=Mus musculus GN=Ctsb PE=2 SV=1	28.6659	28.9317	29.0764	29.2089	30.084	29.8804	29.5228	30.0553	28.9707	29.8856	0.969387	0.00188969
tr|Q3UI56|Q3UI56_MOUSE Annexin OS=Mus musculus GN=Anxa6 PE=2 SV=1;sp|P14824|ANXA6_MOUSE Annexin A6 OS=Mus musculus GN=Anxa6 PE=1 SV=3;tr|F8WIT2|F8WIT2_MOUSE Annexin OS=Mus musculus GN=Anxa6 PE=1 SV=1;tr|Q3TUI1|Q3TUI1_MOUSE Annexin OS=Mus musculus GN=Anxa6	29.3747	29.194	28.2425	27.5859	26.2537	24.9291	26.7824	25.9569	28.5993	25.9805	1.1008	0.00379311
tr|Q542G9|Q542G9_MOUSE Annexin OS=Mus musculus GN=Anxa2 PE=1 SV=1;sp|P07356|ANXA2_MOUSE Annexin A2 OS=Mus musculus GN=Anxa2 PE=1 SV=2;tr|Q9CZI7|Q9CZI7_MOUSE Annexin OS=Mus musculus GN=Anxa2 PE=2 SV=1;tr|Q3UCD3|Q3UCD3_MOUSE Annexin OS=Mus musculus GN=Anxa2	29.8851	29.1355	29.1036	28.8497	28.3615	27.5897	28.226	27.669	29.2435	27.9616	1.04585	0.00492783
tr|Q4FK88|Q4FK88_MOUSE Annexin OS=Mus musculus GN=Anxa1 PE=2 SV=1;tr|Q4FJV4|Q4FJV4_MOUSE Annexin OS=Mus musculus GN=Anxa1 PE=1 SV=1;tr|Q3U5N9|Q3U5N9_MOUSE Annexin OS=Mus musculus GN=Anxa1 PE=2 SV=1;tr|B7STB7|B7STB7_MOUSE Annexin OS=Mus musculus GN=Anxa1 PE	27.0499	26.3694	26.1151	25.6677	25.1342	24.8905	25.2184	24.6603	26.3005	24.9758	1.05304	0.00566528
tr|Q3UBR4|Q3UBR4_MOUSE Uncharacterized protein OS=Mus musculus GN=Ctss PE=2 SV=1;sp|O70370|CATS_MOUSE Cathepsin S OS=Mus musculus GN=Ctss PE=1 SV=2;tr|F6WR04|F6WR04_MOUSE Cathepsin S OS=Mus musculus GN=Ctss PE=1 SV=1;tr|Q8BSZ5|Q8BSZ5_MOUSE Cathepsin S OS=M	28.8185	29.5629	29.2706	29.1772	30.0885	29.8592	29.6712	29.8927	29.2073	29.8779	0.977556	0.00878609
tr|Q3UDR2|Q3UDR2_MOUSE Protein disulfide-isomerase (Fragment) OS=Mus musculus GN=P4hb PE=2 SV=1;tr|Q3URP6|Q3URP6_MOUSE Protein disulfide-isomerase OS=Mus musculus GN=P4hb PE=2 SV=1;tr|Q3TWE3|Q3TWE3_MOUSE Protein disulfide-isomerase OS=Mus musculus GN=P4hb	27.4362	26.5377	26.9937	25.8124	25.2241	25.0089	25.7025	25.1135	26.695	25.2622	1.05671	0.00917955
tr|Q5FWJ3|Q5FWJ3_MOUSE Vimentin OS=Mus musculus GN=Vim PE=1 SV=1;tr|Q3U6S1|Q3U6S1_MOUSE Uncharacterized protein OS=Mus musculus GN=Vim PE=2 SV=1;sp|P20152|VIME_MOUSE Vimentin OS=Mus musculus GN=Vim PE=1 SV=3;tr|Q3V2S4|Q3V2S4_MOUSE Uncharacterized protein O	31.0922	30.6902	30.8165	29.5826	29.332	28.9914	29.4877	29.3311	30.5454	29.2855	1.04302	0.0110742
tr|A0A075B5P5|A0A075B5P5_MOUSE Immunoglobulin heavy constant gamma 3 (Fragment) OS=Mus musculus GN=Ighg3 PE=4 SV=1;sp|P03987|IGHG3_MOUSE Ig gamma-3 chain C region OS=Mus musculus PE=1 SV=2;tr|A0A1Y7VJN6|A0A1Y7VJN6_MOUSE Immunoglobulin heavy constant gamma	28.2932	26.6248	28.5953	29.4511	29.7861	30.7411	31.2966	30.7108	28.2411	30.6336	0.921899	0.0117396
tr|Q545I6|Q545I6_MOUSE Cathepsin Z, isoform CRA_b OS=Mus musculus GN=Ctsz PE=1 SV=1;sp|Q9WUU7|CATZ_MOUSE Cathepsin Z OS=Mus musculus GN=Ctsz PE=1 SV=1;tr|Q9ES94|Q9ES94_MOUSE Cathepsin Z OS=Mus musculus GN=Ctsz PE=2 SV=1	26.2104	26.6246	26.4896	26.7892	28.1522	27.3448	27.2362	27.1158	26.5284	27.4623	0.965996	0.0124037
tr|Q3UKR1|Q3UKR1_MOUSE Decorin OS=Mus musculus GN=Dcn PE=1 SV=1;sp|P28654|PGS2_MOUSE Decorin OS=Mus musculus GN=Dcn PE=1 SV=1;tr|Q3TSV1|Q3TSV1_MOUSE Decorin OS=Mus musculus GN=Dcn PE=2 SV=1	30.2287	29.6429	30.0128	28.9393	28.9843	28.0221	28.6383	27.9513	29.7059	28.399	1.04602	0.0132937
tr|Q9D2D1|Q9D2D1_MOUSE Carboxypeptidase OS=Mus musculus GN=Ctsa PE=2 SV=1;tr|Q544R6|Q544R6_MOUSE Carboxypeptidase OS=Mus musculus GN=Ctsa PE=1 SV=1;sp|P16675|PPGB_MOUSE Lysosomal protective protein OS=Mus musculus GN=Ctsa PE=1 SV=1;tr|G3X8T3|G3X8T3_MOUSE C	25.6081	26.0207	25.8776	26.023	27.0284	26.4222	26.2087	26.6303	25.8823	26.5724	0.97403	0.0136423
tr|Q3UCD9|Q3UCD9_MOUSE Cathepsin D, isoform CRA_a OS=Mus musculus GN=Ctsd PE=1 SV=1;tr|Q3U7P0|Q3U7P0_MOUSE Uncharacterized protein OS=Mus musculus GN=Ctsd PE=2 SV=1;tr|Q3TWR6|Q3TWR6_MOUSE Uncharacterized protein OS=Mus musculus GN=Ctsd PE=2 SV=1;tr|Q3TWD0|	27.2896	27.3897	27.4802	27.194	28.221	27.6705	27.5715	28.0724	27.3384	27.8838	0.980439	0.0174959
sp|P09813|APOA2_MOUSE Apolipoprotein A-II OS=Mus musculus GN=Apoa2 PE=1 SV=2;tr|A7YL62|A7YL62_MOUSE Apolipoprotein A-II OS=Mus musculus GN=Apoa2 PE=4 SV=1	29.4834	29.3429	30.361	30.3589	30.6518	30.98	30.7624	30.8246	29.8865	30.8047	0.970194	0.0176457
tr|A0A077S2U6|A0A077S2U6_MOUSE Lysozyme OS=Mus musculus GN=Lyz2 PE=1 SV=1;sp|P08905|LYZ2_MOUSE Lysozyme C-2 OS=Mus musculus GN=Lyz2 PE=1 SV=2	28.2179	28.8229	28.1964	28.3876	30.012	29.0423	28.9471	29.2473	28.4062	29.3122	0.969093	0.0182768
tr|E9Q5L2|E9Q5L2_MOUSE Inter alpha-trypsin inhibitor, heavy chain 4 OS=Mus musculus GN=Itih4 PE=1 SV=1;tr|E9PVD2|E9PVD2_MOUSE Inter alpha-trypsin inhibitor, heavy chain 4 OS=Mus musculus GN=Itih4 PE=1 SV=1;sp|A6X935|ITIH4_MOUSE Inter alpha-trypsin inhibito	29.4247	27.444	28.116	28.1782	26.5676	25.5133	27.0954	26.9946	28.2907	26.5427	1.06586	0.0189719
tr|Q91WQ0|Q91WQ0_MOUSE Serine (Or cysteine) peptidase inhibitor, clade A, member 6 OS=Mus musculus GN=Serpina6 PE=2 SV=1;sp|Q06770|CBG_MOUSE Corticosteroid-binding globulin OS=Mus musculus GN=Serpina6 PE=1 SV=1;tr|Q3UKW1|Q3UKW1_MOUSE Uncharacterized protei	28.9545	28.9161	28.9895	28.989	28.92	28.7692	28.6189	28.7377	28.9623	28.7615	1.00698	0.0205834
tr|Q8CFZ6|Q8CFZ6_MOUSE C-type lectin domain family 3, member b OS=Mus musculus GN=Clec3b PE=1 SV=1;sp|P43025|TETN_MOUSE Tetranectin OS=Mus musculus GN=Clec3b PE=1 SV=2	27.2875	27.2058	27.459	27.4187	26.7011	26.8726	26.6749	27.271	27.3428	26.8799	1.01722	0.0211976
sp|P54071|IDHP_MOUSE Isocitrate dehydrogenase [NADP], mitochondrial OS=Mus musculus GN=Idh2 PE=1 SV=3;tr|D6RIL6|D6RIL6_MOUSE Isocitrate dehydrogenase [NADP], mitochondrial OS=Mus musculus GN=Idh2 PE=1 SV=1	28.5285	28.5116	28.0256	27.0497	27.0292	26.4745	27.2347	26.4157	28.0289	26.7885	1.0463	0.0214458
tr|Q3V1T9|Q3V1T9_MOUSE Plasminogen OS=Mus musculus GN=Plg PE=2 SV=1;sp|P20918|PLMN_MOUSE Plasminogen OS=Mus musculus GN=Plg PE=1 SV=3;tr|Q6TCI0|Q6TCI0_MOUSE Angiostatin OS=Mus musculus GN=Plg PE=2 SV=1	30.7936	30.7058	31.1223	31.5721	31.7076	31.7884	31.4935	31.7432	31.0484	31.6832	0.979967	0.0219709
tr|B2RWX2|B2RWX2_MOUSE Complement component 4B (Childo blood group) OS=Mus musculus GN=C4b PE=2 SV=1;sp|P01029|CO4B_MOUSE Complement C4-B OS=Mus musculus GN=C4b PE=1 SV=3;tr|B2RXW7|B2RXW7_MOUSE Complement component 4B (Childo blood group) OS=Mus musculus G	29.8827	30.1887	29.889	30.217	30.7574	30.6768	30.2215	30.3832	30.0443	30.5097	0.984746	0.0240898
sp|P48036|ANXA5_MOUSE Annexin A5 OS=Mus musculus GN=Anxa5 PE=1 SV=1	29.5697	29.4432	28.7022	28.6851	28.3126	27.346	28.5746	27.1607	29.1001	27.8485	1.04494	0.025095
sp|P05202|AATM_MOUSE Aspartate aminotransferase, mitochondrial OS=Mus musculus GN=Got2 PE=1 SV=1	27.3322	27.8519	26.4542	25.0898	24.6142	24.3132	25.4335	24.6894	26.682	24.7626	1.07751	0.025398
sp|P01887|B2MG_MOUSE Beta-2-microglobulin OS=Mus musculus GN=B2m PE=1 SV=2;tr|Q9D239|Q9D239_MOUSE Beta-2-microglobulin OS=Mus musculus GN=B2m PE=2 SV=1;tr|Q3U679|Q3U679_MOUSE Beta-2-microglobulin OS=Mus musculus GN=B2m PE=2 SV=1;tr|Q91Z73|Q91Z73_MOUSE Beta	28.4079	28.81	28.8266	28.7727	29.3857	28.9865	28.9214	29.216	28.7043	29.1274	0.985475	0.02736
tr|Q540D7|Q540D7_MOUSE Aldehyde reductase OS=Mus musculus GN=Akr1a1 PE=1 SV=1;sp|Q9JII6|AK1A1_MOUSE Alcohol dehydrogenase [NADP(+)] OS=Mus musculus GN=Akr1a1 PE=1 SV=3;tr|Q80XJ7|Q80XJ7_MOUSE Aldo-keto reductase family 1, member A4 (Aldehyde reductase) OS=M	26.7434	26.4851	26.4672	26.2719	25.7639	26.0999	26.3713	25.9329	26.4919	26.042	1.01728	0.031817
tr|Q543C5|Q543C5_MOUSE Osteoglycin OS=Mus musculus GN=Ogn PE=1 SV=1;sp|Q62000|MIME_MOUSE Mimecan OS=Mus musculus GN=Ogn PE=1 SV=1	27.8494	26.7986	27.9462	27.3379	26.2231	25.4021	26.9276	26.6676	27.483	26.3051	1.04478	0.0326794
tr|Q3UIP2|Q3UIP2_MOUSE Procollagen C-endopeptidase enhancer protein OS=Mus musculus GN=Pcolce PE=1 SV=1;sp|Q61398|PCOC1_MOUSE Procollagen C-endopeptidase enhancer 1 OS=Mus musculus GN=Pcolce PE=1 SV=2;tr|Q3UN82|Q3UN82_MOUSE Uncharacterized protein OS=Mus m	28.4337	28.7585	28.6236	28.5456	28.5332	27.8753	27.5544	28.0316	28.5903	27.9986	1.02113	0.0332538
sp|P08249|MDHM_MOUSE Malate dehydrogenase, mitochondrial OS=Mus musculus GN=Mdh2 PE=1 SV=3	29.6612	29.4843	29.3132	28.325	28.3125	27.8263	28.7368	28.0799	29.1959	28.2389	1.03389	0.0361298
sp|Q99KI0|ACON_MOUSE Aconitate hydratase, mitochondrial OS=Mus musculus GN=Aco2 PE=1 SV=1	29.5987	29.7231	29.3183	28.4929	28.6105	27.9538	28.8104	28.0889	29.2832	28.3659	1.03234	0.0373221
sp|P24549|AL1A1_MOUSE Retinal dehydrogenase 1 OS=Mus musculus GN=Aldh1a1 PE=1 SV=5	27.7606	28.4219	27.4901	28.13	28.4187	28.8453	28.7762	28.3289	27.9506	28.5923	0.977559	0.0376723
tr|A0A1C7CYU3|A0A1C7CYU3_MOUSE Nucleobindin 1, isoform CRA_b OS=Mus musculus GN=Nucb1 PE=1 SV=1;sp|Q02819|NUCB1_MOUSE Nucleobindin-1 OS=Mus musculus GN=Nucb1 PE=1 SV=2;tr|Q8BRD3|Q8BRD3_MOUSE Uncharacterized protein OS=Mus musculus GN=Nucb1 PE=2 SV=1;tr|Q3T	27.6581	26.7827	26.741	27.9122	26.8825	26.2559	26.1782	26.03	27.2735	26.3367	1.03557	0.0382163
sp|Q61147|CERU_MOUSE Ceruloplasmin OS=Mus musculus GN=Cp PE=1 SV=2;tr|E9PZD8|E9PZD8_MOUSE Ceruloplasmin OS=Mus musculus GN=Cp PE=1 SV=1;tr|G3X9T8|G3X9T8_MOUSE Ceruloplasmin OS=Mus musculus GN=Cp PE=1 SV=1;tr|G3X8Q5|G3X8Q5_MOUSE Ceruloplasmin OS=Mus musculu	31.0314	31.3319	31.2556	31.5613	31.7112	31.6046	31.532	31.5564	31.2951	31.6011	0.990316	0.0389468
sp|P56480|ATPB_MOUSE ATP synthase subunit beta, mitochondrial OS=Mus musculus GN=Atp5b PE=1 SV=2	29.9927	30.303	29.5531	28.4821	28.5663	28.1396	28.9084	27.6568	29.5827	28.3178	1.04467	0.0391158
sp|O89020|AFAM_MOUSE Afamin OS=Mus musculus GN=Afm PE=1 SV=2	28.7463	28.6016	29.1462	29.3265	29.2839	29.6387	29.4332	29.4019	28.9552	29.4394	0.98355	0.0393164
sp|P16045|LEG1_MOUSE Galectin-1 OS=Mus musculus GN=Lgals1 PE=1 SV=3	29.2625	28.6708	28.8924	28.4931	28.0904	28.2078	28.4945	28.5142	28.8297	28.3267	1.01776	0.0428829
tr|Q8BS79|Q8BS79_MOUSE Uncharacterized protein OS=Mus musculus PE=2 SV=1;tr|Q8CE18|Q8CE18_MOUSE Uncharacterized protein OS=Mus musculus PE=2 SV=1;tr|Q8VDK4|Q8VDK4_MOUSE Cadherin 13 OS=Mus musculus GN=Cdh13 PE=1 SV=1;sp|Q9WTR5|CAD13_MOUSE Cadherin-13 OS=Mus	26.2165	26.8017	26.4447	26.3372	26.3982	25.7449	25.7053	25.877	26.45	25.9313	1.02	0.0436862
tr|Q5F1Z8|Q5F1Z8_MOUSE GM2 ganglioside activator protein OS=Mus musculus GN=Gm2a PE=1 SV=1;sp|Q60648|SAP3_MOUSE Ganglioside GM2 activator OS=Mus musculus GN=Gm2a PE=1 SV=2	28.3311	29.0741	28.7572	28.4797	28.1596	27.9514	28.385	28.2794	28.6605	28.1938	1.01655	0.0478924
sp|P28665|MUG1_MOUSE Murinoglobulin-1 OS=Mus musculus GN=Mug1 PE=1 SV=3	29.9669	30.711	31.3457	31.5895	31.4227	32.2015	32.0653	31.769	30.9033	31.8646	0.96983	0.0538909
tr|Q3TBM1|Q3TBM1_MOUSE Alpha-mannosidase OS=Mus musculus GN=Man2b1 PE=2 SV=1;sp|O09159|MA2B1_MOUSE Lysosomal alpha-mannosidase OS=Mus musculus GN=Man2b1 PE=1 SV=4	24.9008	25.9239	25.4917	25.235	26.4504	26.1047	25.7319	25.8312	25.3879	26.0295	0.975348	0.054472
tr|Q8CEH8|Q8CEH8_MOUSE Profilin OS=Mus musculus GN=Pfn1 PE=2 SV=1;tr|Q5SX50|Q5SX50_MOUSE Profilin OS=Mus musculus GN=Pfn1 PE=1 SV=1;sp|P62962|PROF1_MOUSE Profilin-1 OS=Mus musculus GN=Pfn1 PE=1 SV=2;tr|Q3U7V7|Q3U7V7_MOUSE Profilin OS=Mus musculus GN=Pfn1 P	26.883	25.9954	26.7023	26.0874	25.67	25.911	25.9725	25.9166	26.417	25.8675	1.02124	0.0547191
sp|P27773|PDIA3_MOUSE Protein disulfide-isomerase A3 OS=Mus musculus GN=Pdia3 PE=1 SV=2	28.3838	27.8722	27.9857	27.3759	27.6088	26.6799	27.5079	26.9383	27.9044	27.1837	1.02651	0.0560942
tr|B7ZNR0|B7ZNR0_MOUSE Ecm1 protein OS=Mus musculus GN=Ecm1 PE=2 SV=1;tr|Q9QX30|Q9QX30_MOUSE Extracellular matrix protein OS=Mus musculus PE=4 SV=1;tr|Q3TDX7|Q3TDX7_MOUSE Extracellular matrix protein 1 OS=Mus musculus GN=Ecm1 PE=2 SV=1;sp|Q61508|ECM1_MOUSE	27.1741	27.4909	27.5455	27.4213	27.453	26.9306	26.6909	26.7282	27.4079	26.9507	1.01697	0.0562616
sp|P08228|SODC_MOUSE Superoxide dismutase [Cu-Zn] OS=Mus musculus GN=Sod1 PE=1 SV=2	31.1541	30.7506	30.9551	30.7087	31.2283	31.3885	31.0142	31.1521	30.8921	31.1958	0.990266	0.0565833
sp|Q07797|LG3BP_MOUSE Galectin-3-binding protein OS=Mus musculus GN=Lgals3bp PE=1 SV=1	25.6951	25.879	25.9933	26.0242	26.2171	26.2291	25.9116	26.3265	25.8979	26.1711	0.989562	0.0578019
tr|A0A0R4J0I1|A0A0R4J0I1_MOUSE MCG1051009 OS=Mus musculus GN=Serpina3k PE=1 SV=1	32.2313	32.6704	33.8584	34.1313	33.6343	34.8843	34.5708	34.873	33.2229	34.4906	0.963244	0.0588018
sp|Q9DBD0|ICA_MOUSE Inhibitor of carbonic anhydrase OS=Mus musculus GN=Ica PE=1 SV=1;tr|Q8VC96|Q8VC96_MOUSE Uncharacterized protein OS=Mus musculus GN=1300017J02Rik PE=2 SV=1;tr|D3YY36|D3YY36_MOUSE RIKEN cDNA 1300017J02 gene OS=Mus musculus GN=1300017J02Ri	28.9194	29.1303	29.4473	29.8174	29.7536	29.822	29.7237	29.8283	29.3286	29.7819	0.98478	0.0614446
tr|Q3V2G1|Q3V2G1_MOUSE Uncharacterized protein OS=Mus musculus GN=Apoa1 PE=2 SV=1;sp|Q00623|APOA1_MOUSE Apolipoprotein A-I OS=Mus musculus GN=Apoa1 PE=1 SV=2;tr|Q58EV2|Q58EV2_MOUSE Apoa1 protein OS=Mus musculus GN=Apoa1 PE=2 SV=1	32.8494	33.7693	33.5911	34.2418	33.8549	34.9423	34.4935	34.5165	33.6129	34.4518	0.97565	0.0616875
tr|B7ZP22|B7ZP22_MOUSE Heterogeneous nuclear ribonucleoprotein A2/B1 OS=Mus musculus GN=Hnrnpa2b1 PE=2 SV=1;sp|O88569|ROA2_MOUSE Heterogeneous nuclear ribonucleoproteins A2/B1 OS=Mus musculus GN=Hnrnpa2b1 PE=1 SV=2	27.6049	27.2591	27.5954	26.0842	26.6303	25.9322	26.4866	25.922	27.1359	26.2428	1.03403	0.0692356
sp|P05201|AATC_MOUSE Aspartate aminotransferase, cytoplasmic OS=Mus musculus GN=Got1 PE=1 SV=3	29.1437	29.3702	29.1035	28.7513	28.2845	28.074	29.1648	28.5054	29.0922	28.5072	1.02052	0.0722768
sp|Q8R429|AT2A1_MOUSE Sarcoplasmic/endoplasmic reticulum calcium ATPase 1 OS=Mus musculus GN=Atp2a1 PE=1 SV=1	29.4615	29.9421	29.17	27.9421	28.7075	26.7387	28.1746	27.7894	29.1289	27.8525	1.04583	0.0759574
tr|Q53ZN9|Q53ZN9_MOUSE Anion exchange protein OS=Mus musculus GN=Slc4a1 PE=2 SV=1;tr|Q3U065|Q3U065_MOUSE Anion exchange protein OS=Mus musculus GN=Slc4a1 PE=2 SV=1;tr|Q3TZJ1|Q3TZJ1_MOUSE Anion exchange protein OS=Mus musculus GN=Slc4a1 PE=2 SV=1;tr|Q3TNL6|	27.968	28.8594	27.9896	28.5659	28.438	31.0576	29.1547	29.8654	28.3457	29.6289	0.956691	0.0763422
sp|Q6GQT1|A2MG_MOUSE Alpha-2-macroglobulin-P OS=Mus musculus GN=A2m PE=2 SV=2	27.9444	28.8071	28.2816	28.709	29.2817	28.803	28.6909	28.9918	28.4355	28.9419	0.982505	0.0772082
tr|Q3USP9|Q3USP9_MOUSE Metallothionein OS=Mus musculus GN=Mt3 PE=1 SV=1;sp|P28184|MT3_MOUSE Metallothionein-3 OS=Mus musculus GN=Mt3 PE=1 SV=1	26.5482	26.3785	25.9735	25.7249	25.7886	25.6359	25.8486	25.7095	26.1563	25.7456	1.01595	0.0777874
sp|Q00897|A1AT4_MOUSE Alpha-1-antitrypsin 1-4 OS=Mus musculus GN=Serpina1d PE=1 SV=1	34.1315	34.173	34.8724	35.0538	34.6554	35.419	35.2467	35.479	34.5577	35.2	0.981752	0.0780484
sp|Q9WVJ3|CBPQ_MOUSE Carboxypeptidase Q OS=Mus musculus GN=Cpq PE=1 SV=1	26.4775	26.77	26.56	26.4771	26.9739	26.6305	26.7065	26.8219	26.5712	26.7832	0.992084	0.0824121
tr|Q3UEL3|Q3UEL3_MOUSE Uncharacterized protein OS=Mus musculus GN=Il1rap PE=2 SV=1;sp|Q61730|IL1AP_MOUSE Interleukin-1 receptor accessory protein OS=Mus musculus GN=Il1rap PE=1 SV=1;tr|E9Q6I2|E9Q6I2_MOUSE Interleukin-1 receptor accessory protein OS=Mus mus	26.1648	26.7924	27.1539	27.384	27.3669	27.4741	27.3613	27.5216	26.8738	27.431	0.979688	0.0835653
tr|Q3UWS9|Q3UWS9_MOUSE Uncharacterized protein (Fragment) OS=Mus musculus GN=Prdx5 PE=2 SV=1;tr|Q3U7H9|Q3U7H9_MOUSE Uncharacterized protein (Fragment) OS=Mus musculus GN=Prdx5 PE=2 SV=1;sp|P99029|PRDX5_MOUSE Peroxiredoxin-5, mitochondrial OS=Mus musculus G	26.9164	27.2844	26.6974	26.1661	25.8344	25.3329	26.7598	26.053	26.7661	25.995	1.02966	0.0870229
sp|P52430|PON1_MOUSE Serum paraoxonase/arylesterase 1 OS=Mus musculus GN=Pon1 PE=1 SV=2;tr|H3BK03|H3BK03_MOUSE Serum paraoxonase/arylesterase 1 (Fragment) OS=Mus musculus GN=Pon1 PE=1 SV=8	26.1609	26.5052	26.547	27.257	26.7447	27.5901	27.2325	27.2536	26.6175	27.2052	0.978398	0.08774
sp|P50396|GDIA_MOUSE Rab GDP dissociation inhibitor alpha OS=Mus musculus GN=Gdi1 PE=1 SV=3	25.7268	25.2197	25.6155	25.2497	25.5301	25.8394	25.9761	25.7517	25.4529	25.7743	0.98753	0.0892639
tr|Q9D0C0|Q9D0C0_MOUSE Uncharacterized protein OS=Mus musculus GN=Ctsl PE=2 SV=1;tr|Q543M3|Q543M3_MOUSE Cathepsin L OS=Mus musculus GN=Ctsl PE=1 SV=1;tr|Q3UHZ4|Q3UHZ4_MOUSE Uncharacterized protein OS=Mus musculus GN=Ctsl PE=2 SV=1;tr|Q3U5U9|Q3U5U9_MOUSE Un	27.4984	28.2216	27.7932	28.1098	28.9176	28.1929	28.2262	28.2272	27.9057	28.3909	0.98291	0.0895707
sp|Q91X72|HEMO_MOUSE Hemopexin OS=Mus musculus GN=Hpx PE=1 SV=2;tr|Q8K1U6|Q8K1U6_MOUSE Hemopexin (Fragment) OS=Mus musculus PE=4 SV=1	33.9309	33.4839	33.6399	34.246	33.4942	33.3696	33.4788	33.5804	33.8252	33.4807	1.01029	0.0944636
sp|Q03265|ATPA_MOUSE ATP synthase subunit alpha, mitochondrial OS=Mus musculus GN=Atp5a1 PE=1 SV=1;tr|D3Z6F5|D3Z6F5_MOUSE ATP synthase subunit alpha OS=Mus musculus GN=Atp5a1 PE=1 SV=1	29.4465	30.246	28.7455	27.8405	28.2704	27.8199	28.4868	27.1678	29.0696	27.9362	1.04057	0.102578
tr|H9H9R5|H9H9R5_MOUSE Plasma kallikrein OS=Mus musculus GN=Klkb1 PE=1 SV=2;sp|P26262|KLKB1_MOUSE Plasma kallikrein OS=Mus musculus GN=Klkb1 PE=1 SV=2	25.8565	26.7688	27.067	27.2113	26.9517	27.6021	27.6025	27.3337	26.7259	27.3725	0.976378	0.106573
sp|Q9CZU6|CISY_MOUSE Citrate synthase, mitochondrial OS=Mus musculus GN=Cs PE=1 SV=1;tr|Q0QEL9|Q0QEL9_MOUSE Citrate synthase (Fragment) OS=Mus musculus GN=Cs PE=2 SV=1	27.6834	27.8723	27.3156	26.1465	26.6192	25.9974	26.9488	26.0806	27.2545	26.4115	1.03192	0.108994
tr|Q3TYE5|Q3TYE5_MOUSE Limbic system-associated membrane protein OS=Mus musculus GN=Lsamp PE=1 SV=1;sp|Q8BLK3|LSAMP_MOUSE Limbic system-associated membrane protein OS=Mus musculus GN=Lsamp PE=1 SV=1;tr|A0A087WP80|A0A087WP80_MOUSE Limbic system-associated m	28.1312	28.6751	28.4314	28.821	28.4409	28.0968	27.9021	28.2254	28.5147	28.1663	1.01237	0.114308
tr|Q3UFS5|Q3UFS5_MOUSE Phospholipid transfer protein OS=Mus musculus GN=Pltp PE=1 SV=1;sp|P55065|PLTP_MOUSE Phospholipid transfer protein OS=Mus musculus GN=Pltp PE=1 SV=1;tr|A2A5K2|A2A5K2_MOUSE Phospholipid transfer protein OS=Mus musculus GN=Pltp PE=1 SV	27.1578	27.9612	27.4127	27.5063	27.3701	27.1752	26.5141	27.1356	27.5095	27.0487	1.01703	0.114853
tr|Q3UAS4|Q3UAS4_MOUSE Uncharacterized protein OS=Mus musculus GN=Psap PE=2 SV=1;tr|Q3UE29|Q3UE29_MOUSE Uncharacterized protein OS=Mus musculus GN=Psap PE=2 SV=1;tr|E9PZ00|E9PZ00_MOUSE Prosaposin OS=Mus musculus GN=Psap PE=1 SV=1;tr|Q3TXJ0|Q3TXJ0_MOUSE Unc	28.8097	29.1401	28.8901	28.8393	29.1884	29.0265	28.9713	29.1641	28.9198	29.0876	0.994232	0.117617
sp|Q9QXV0|PCSK1_MOUSE ProSAAS OS=Mus musculus GN=Pcsk1n PE=1 SV=2	31.291	31.8079	31.359	31.0689	31.2456	30.2405	31.1707	30.8537	31.3817	30.8776	1.01633	0.117887
tr|Q61649|Q61649_MOUSE Alpha-globin mRNA (Fragment) OS=Mus musculus PE=2 SV=1	30.7502	30.6769	31.8078	30.5544	30.5984	33.5156	32.0705	32.4804	30.9473	32.1662	0.962107	0.118937
tr|Q66JR8|Q66JR8_MOUSE Ptms protein OS=Mus musculus GN=Ptms PE=2 SV=1;sp|Q9D0J8|PTMS_MOUSE Parathymosin OS=Mus musculus GN=Ptms PE=1 SV=3	27.9454	27.1922	27.618	26.4053	27.018	26.5225	26.7406	26.195	27.2902	26.619	1.02522	0.124135
tr|A0A0R4J0X5|A0A0R4J0X5_MOUSE Alpha-1-antitrypsin 1-3 OS=Mus musculus GN=Serpina1c PE=1 SV=1	31.7196	31.7143	32.5054	32.6842	31.9838	33.2527	33.0201	33.1451	32.1559	32.8504	0.978858	0.124378
sp|P13020|GELS_MOUSE Gelsolin OS=Mus musculus GN=Gsn PE=1 SV=3;tr|A0A0J9YUQ8|A0A0J9YUQ8_MOUSE Gelsolin (Fragment) OS=Mus musculus GN=Gsn PE=1 SV=1	31.7123	32.0436	32.2209	31.8328	32.0704	31.4705	31.3204	31.5612	31.9524	31.6056	1.01097	0.130311
tr|Q91XL1|Q91XL1_MOUSE Leucine-rich HEV glycoprotein OS=Mus musculus GN=Lrg1 PE=1 SV=1	28.7513	27.4503	28.1195	28.7201	27.7918	27.5664	27.58	27.8921	28.2603	27.7076	1.01995	0.13183
tr|Q3U6E4|Q3U6E4_MOUSE Uncharacterized protein OS=Mus musculus GN=Ptma PE=2 SV=1;tr|Q0VGU2|Q0VGU2_MOUSE Prothymosin alpha OS=Mus musculus GN=Ptma PE=1 SV=1;sp|P26350|PTMA_MOUSE Prothymosin alpha OS=Mus musculus GN=Ptma PE=1 SV=2;tr|Q8CAQ5|Q8CAQ5_MOUSE MCG1	27.3656	26.669	27.2475	26.5401	27.0934	26.2067	26.0328	26.3385	26.9555	26.4178	1.02035	0.13495
tr|Q3TXR9|Q3TXR9_MOUSE Beta-hexosaminidase OS=Mus musculus GN=Hexb PE=1 SV=1;sp|P20060|HEXB_MOUSE Beta-hexosaminidase subunit beta OS=Mus musculus GN=Hexb PE=1 SV=2	29.0426	29.591	29.2948	29.3465	30.2339	29.6175	29.3475	29.5784	29.3187	29.6943	0.987351	0.139122
tr|A5JUZ1|A5JUZ1_MOUSE Ubiqutin subunit 1 (Fragment) OS=Mus musculus GN=Ubc PE=2 SV=1;tr|A0A0A6YW67|A0A0A6YW67_MOUSE MCG23377, isoform CRA_b OS=Mus musculus GN=Gm8797 PE=4 SV=1;tr|E9Q9J0|E9Q9J0_MOUSE Ubiquitin-60S ribosomal protein L40 (Fragment) OS=Mus mu	30.2012	30.0384	29.9958	29.7391	30.1845	30.1962	29.9893	30.4283	29.9936	30.1996	0.993179	0.16756
tr|Q3TKX1|Q3TKX1_MOUSE ATPase, H+ transporting, lysosomal accessory protein OS=Mus musculus GN=Atp6ap1 PE=1 SV=1;tr|Q3UCY7|Q3UCY7_MOUSE Uncharacterized protein OS=Mus musculus GN=Atp6ap1 PE=2 SV=1;tr|Q3TWN7|Q3TWN7_MOUSE ATPase, H+ transporting, lysosomal a	27.465	28.3635	27.826	27.7255	27.865	27.3608	27.0676	27.5107	27.845	27.451	1.01435	0.168048
sp|P21614|VTDB_MOUSE Vitamin D-binding protein OS=Mus musculus GN=Gc PE=1 SV=2	32.6619	32.5182	33.1633	33.2759	33.2916	33.121	33.0522	33.4233	32.9048	33.222	0.990452	0.170241
tr|Q56A15|Q56A15_MOUSE Cytochrome c OS=Mus musculus GN=Cycs PE=1 SV=1;sp|P62897|CYC_MOUSE Cytochrome c, somatic OS=Mus musculus GN=Cycs PE=1 SV=2	27.9079	27.2327	27.8865	27.6228	27.4273	26.8242	27.4737	27.5199	27.6625	27.3113	1.01286	0.172497
tr|Q545M7|Q545M7_MOUSE Parvalbumin, isoform CRA_a OS=Mus musculus GN=Pvalb PE=1 SV=1;sp|P32848|PRVA_MOUSE Parvalbumin alpha OS=Mus musculus GN=Pvalb PE=1 SV=3	32.5644	32.5334	32.704	32.6194	32.7941	30.7091	31.6262	32.4364	32.6053	31.8914	1.02238	0.175795
sp|B5X0G2|MUP17_MOUSE Major urinary protein 17 OS=Mus musculus GN=Mup17 PE=2 SV=2;tr|A2CEK6|A2CEK6_MOUSE Major urinary protein 11 OS=Mus musculus GN=Mup13 PE=3 SV=1;tr|L7N222|L7N222_MOUSE Major urinary protein 13 OS=Mus musculus GN=Mup13 PE=3 SV=1;tr|B0V38	27.4804	26.8686	29.3149	29.9302	29.8705	29.4202	29.3195	29.4117	28.3985	29.5055	0.962482	0.184788
tr|Q5UCA9|Q5UCA9_MOUSE Ribonuclease 4 OS=Mus musculus GN=Rnase4 PE=2 SV=1;tr|Q8C7E4|Q8C7E4_MOUSE Ribonuclease 4 OS=Mus musculus GN=Rnase4 PE=1 SV=1;tr|Q6NXX2|Q6NXX2_MOUSE Rnase4 protein OS=Mus musculus GN=Rnase4 PE=2 SV=1;sp|Q9JJH1|RNAS4_MOUSE Ribonuclease	27.2961	27.2578	27.3341	27.2695	27.5747	26.7301	26.7817	26.9221	27.2894	27.0022	1.01064	0.192851
tr|B2CQD6|B2CQD6_MOUSE Fibulin-1 OS=Mus musculus GN=Fbln1 PE=2 SV=1;sp|Q08879|FBLN1_MOUSE Fibulin-1 OS=Mus musculus GN=Fbln1 PE=1 SV=2;tr|Q3TWK8|Q3TWK8_MOUSE Fibulin-1 OS=Mus musculus GN=Fbln1 PE=2 SV=1	26.7405	27.3508	27.1008	26.9535	27.333	26.5226	26.5076	26.1228	27.0364	26.6215	1.01558	0.195781
sp|Q61477|NBL1_MOUSE Neuroblastoma suppressor of tumorigenicity 1 OS=Mus musculus GN=Nbl1 PE=1 SV=2	26.812	27.8301	27.1157	27.3796	27.4305	26.8846	26.5457	26.5464	27.2844	26.8518	1.01611	0.199677
sp|P06728|APOA4_MOUSE Apolipoprotein A-IV OS=Mus musculus GN=Apoa4 PE=1 SV=3;tr|Q9DBN0|Q9DBN0_MOUSE Uncharacterized protein OS=Mus musculus GN=Apoa4 PE=2 SV=1;tr|Q810I7|Q810I7_MOUSE Apoa4 protein OS=Mus musculus GN=Apoa4 PE=2 SV=1;tr|Q01488|Q01488_MUSMC Ap	31.3588	31.3968	31.9983	31.6809	31.7201	31.9407	31.6954	32.0757	31.6087	31.858	0.992175	0.202319
tr|Q3UTR7|Q3UTR7_MOUSE Angiotensinogen OS=Mus musculus GN=Agt PE=1 SV=1;sp|P11859|ANGT_MOUSE Angiotensinogen OS=Mus musculus GN=Agt PE=1 SV=1;tr|Q8VCN0|Q8VCN0_MOUSE Agt protein OS=Mus musculus GN=Agt PE=2 SV=1	30.4136	30.7348	30.4677	30.9091	30.9965	30.8621	30.6887	30.7444	30.6313	30.8229	0.993783	0.204818
sp|P11589|MUP2_MOUSE Major urinary protein 2 OS=Mus musculus GN=Mup2 PE=1 SV=1;tr|Q8JZT0|Q8JZT0_MOUSE Mup1 protein OS=Mus musculus PE=2 SV=1	29.3957	28.6432	30.909	31.8766	32.0376	31.0537	30.7358	31.3832	30.2061	31.3026	0.964972	0.209777
sp|Q80YC5|FA12_MOUSE Coagulation factor XII OS=Mus musculus GN=F12 PE=1 SV=2	26.5291	26.8982	26.7279	27.2083	27.0765	26.9641	27.0401	27.1025	26.8409	27.0458	0.992423	0.212615
tr|Q4FK40|Q4FK40_MOUSE Apoe protein OS=Mus musculus GN=Apoe PE=2 SV=1;tr|Q3UBS0|Q3UBS0_MOUSE Uncharacterized protein OS=Mus musculus GN=Apoe PE=2 SV=1;tr|Q3TXU4|Q3TXU4_MOUSE Apolipoprotein E, isoform CRA_h OS=Mus musculus GN=Apoe PE=1 SV=1;sp|P08226|APOE_M	32.8829	33.6873	33.3028	33.0706	34.1793	33.5573	33.1872	33.5216	33.2359	33.6114	0.98883	0.213486
tr|Q9DBH3|Q9DBH3_MOUSE Uncharacterized protein OS=Mus musculus GN=Gpld1 PE=2 SV=1;tr|Q8VCU2|Q8VCU2_MOUSE Glycosylphosphatidylinositol specific phospholipase D1 OS=Mus musculus GN=Gpld1 PE=1 SV=1;tr|Q8R432|Q8R432_MOUSE Glycosylphosphatidylinositol phospholi	25.7155	26.4091	26.2184	26.4785	26.6776	26.8576	26.1426	26.4267	26.2054	26.5261	0.987908	0.216093
tr|Q3UWP8|Q3UWP8_MOUSE Uncharacterized protein (Fragment) OS=Mus musculus GN=Calr PE=2 SV=1;tr|B2MWM9|B2MWM9_MOUSE Calreticulin OS=Mus musculus GN=Calr PE=1 SV=1;sp|P14211|CALR_MOUSE Calreticulin OS=Mus musculus GN=Calr PE=1 SV=1	28.1662	27.8085	27.8749	27.3563	27.8375	27.4083	27.5701	27.2082	27.8015	27.506	1.01074	0.216381
sp|P03977|KV3A4_MOUSE Ig kappa chain V-III region 50S10.1 OS=Mus musculus PE=1 SV=1;sp|P01656|KV3A3_MOUSE Ig kappa chain V-III region MOPC 70 OS=Mus musculus PE=1 SV=1;sp|P01654|KV3A1_MOUSE Ig kappa chain V-III region PC 2880/PC 1229 OS=Mus musculus PE=1 S	26.9562	26.5202	26.184	27.2195	25.5083	25.3804	26.8409	26.6893	26.72	26.1047	1.02357	0.217742
sp|P70232|NCHL1_MOUSE Neural cell adhesion molecule L1-like protein OS=Mus musculus GN=Chl1 PE=1 SV=2	26.3197	27.5617	27.4587	26.4912	28.1656	27.4523	26.8768	27.611	26.9578	27.5264	0.979343	0.221362
sp|Q9DAK9|PHP14_MOUSE 14 kDa phosphohistidine phosphatase OS=Mus musculus GN=Phpt1 PE=1 SV=1	27.2996	26.5863	27.3345	26.6029	25.5828	26.2344	26.8083	27.071	26.9558	26.4241	1.02012	0.222545
tr|Q544M1|Q544M1_MOUSE Lymphocyte antigen 6 complex, locus H, isoform CRA_a OS=Mus musculus GN=Ly6h PE=1 SV=1;sp|Q9WUC3|LY6H_MOUSE Lymphocyte antigen 6H OS=Mus musculus GN=Ly6h PE=1 SV=2;tr|Q8K356|Q8K356_MOUSE Lymphocyte antigen 6 complex, locus H OS=Mus m	27.8791	28.8106	28.5205	28.3495	28.5428	27.8244	27.779	28.0199	28.3899	28.0415	1.01242	0.232089
sp|Q9CQM5|TXD17_MOUSE Thioredoxin domain-containing protein 17 OS=Mus musculus GN=Txndc17 PE=1 SV=1	25.6139	25.0522	25.0992	24.6835	24.8167	24.7395	24.9346	24.9368	25.1122	24.8569	1.01027	0.243241
tr|Q9DC41|Q9DC41_MOUSE Uncharacterized protein OS=Mus musculus GN=Hspa5 PE=2 SV=1;tr|Q3U9G2|Q3U9G2_MOUSE Uncharacterized protein OS=Mus musculus GN=Hspa5 PE=2 SV=1;tr|Q3TWF2|Q3TWF2_MOUSE Uncharacterized protein OS=Mus musculus GN=Hspa5 PE=2 SV=1;sp|P20029|	27.4717	27.4071	27.2299	26.7369	27.2274	26.7085	27.0899	26.7666	27.2114	26.9481	1.00977	0.252882
tr|Q9D1R6|Q9D1R6_MOUSE Uncharacterized protein OS=Mus musculus GN=Tpm2 PE=2 SV=1;sp|P58774|TPM2_MOUSE Tropomyosin beta chain OS=Mus musculus GN=Tpm2 PE=1 SV=1;tr|Q61344|Q61344_MOUSE Beta-tropomyosin OS=Mus musculus GN=Tpm2 PE=2 SV=1;tr|A2AIM4|A2AIM4_MOUSE	26.5615	27.5402	27.115	25.8721	26.2369	25.7079	26.9056	26.0099	26.7722	26.2151	1.02125	0.253798
sp|Q07456|AMBP_MOUSE Protein AMBP OS=Mus musculus GN=Ambp PE=1 SV=2	27.6036	27.5211	27.346	27.7299	27.4682	27.5606	27.2858	27.3962	27.5502	27.4277	1.00447	0.263259
tr|Q9QYT9|Q9QYT9_MOUSE Major prion protein OS=Mus musculus GN=Prnpb PE=3 SV=1;tr|Q4FJQ7|Q4FJQ7_MOUSE Major prion protein OS=Mus musculus GN=Prnp PE=1 SV=1;tr|Q3UBH0|Q3UBH0_MOUSE Major prion protein OS=Mus musculus GN=Prnp PE=2 SV=1;tr|Q3TZI7|Q3TZI7_MOUSE M	28.2856	28.7086	28.7853	28.1076	28.8299	28.7534	28.3564	28.9861	28.4718	28.7314	0.990963	0.26577
tr|Q3TGR2|Q3TGR2_MOUSE Fibrinogen, B beta polypeptide, isoform CRA_a OS=Mus musculus GN=Fgb PE=1 SV=1;sp|Q8K0E8|FIBB_MOUSE Fibrinogen beta chain OS=Mus musculus GN=Fgb PE=1 SV=1	28.5208	28.615	28.7258	28.794	29.5117	28.5782	28.6071	29.0759	28.6639	28.9432	0.990349	0.268776
sp|Q61838|PZP_MOUSE Pregnancy zone protein OS=Mus musculus GN=Pzp PE=1 SV=3	32.741	32.9915	32.9498	33.4437	32.674	34.2119	33.6315	33.3188	33.0315	33.459	0.987222	0.271336
sp|P19157|GSTP1_MOUSE Glutathione S-transferase P 1 OS=Mus musculus GN=Gstp1 PE=1 SV=2;sp|P46425|GSTP2_MOUSE Glutathione S-transferase P 2 OS=Mus musculus GN=Gstp2 PE=1 SV=2;tr|K9JA74|K9JA74_MOUSE Glutathione S-transferase pi 2 (Fragment) OS=Mus musculus G	28.6294	28.2354	28.7699	27.859	28.0714	27.8124	28.2637	28.2378	28.3734	28.0963	1.00986	0.273949
tr|Q9CWS5|Q9CWS5_MOUSE Uncharacterized protein OS=Mus musculus PE=2 SV=1	33.9292	33.4758	33.8215	34.1676	33.4308	34.9038	34.1452	34.5851	33.8485	34.2662	0.987811	0.277569
sp|P29788|VTNC_MOUSE Vitronectin OS=Mus musculus GN=Vtn PE=1 SV=2	29.2126	30.0006	29.55	29.6762	29.8042	29.2848	28.9779	29.2459	29.6099	29.3282	1.0096	0.280319
sp|Q9QUR8|SEM7A_MOUSE Semaphorin-7A OS=Mus musculus GN=Sema7a PE=1 SV=1	25.5805	26.6576	26.2875	26.5465	26.6994	26.501	26.4237	26.6264	26.268	26.5626	0.988909	0.282726
sp|Q03157|APLP1_MOUSE Amyloid-like protein 1 OS=Mus musculus GN=Aplp1 PE=1 SV=1;tr|Q3U311|Q3U311_MOUSE Uncharacterized protein OS=Mus musculus GN=Aplp1 PE=2 SV=1;tr|A0A0R4IZZ1|A0A0R4IZZ1_MOUSE Amyloid beta (A4)-like protein 1 OS=Mus musculus GN=Aplp1 PE=1	29.9809	30.6103	30.5984	30.4862	30.663	29.8888	29.8461	30.1647	30.4189	30.1406	1.00923	0.289557
sp|P01027|CO3_MOUSE Complement C3 OS=Mus musculus GN=C3 PE=1 SV=3	32.5315	31.8663	32.253	32.5389	32.4625	33.1446	32.3235	32.3949	32.2974	32.5814	0.991286	0.294525
sp|Q4V9Z5|SE6L2_MOUSE Seizure 6-like protein 2 OS=Mus musculus GN=Sez6l2 PE=1 SV=1	25.5833	26.4845	25.8312	25.9292	26.2248	25.5667	25.1776	25.5368	25.957	25.6265	1.0129	0.297047
tr|Q8BSI9|Q8BSI9_MOUSE Uncharacterized protein OS=Mus musculus GN=Cdh2 PE=2 SV=1;tr|Q3UIC2|Q3UIC2_MOUSE Uncharacterized protein OS=Mus musculus GN=Cdh2 PE=2 SV=1;sp|P15116|CADH2_MOUSE Cadherin-2 OS=Mus musculus GN=Cdh2 PE=1 SV=2;tr|D3YYT0|D3YYT0_MOUSE Cadh	28.8056	29.5616	29.1916	29.0578	29.3876	28.4162	28.6843	28.9453	29.1542	28.8583	1.01025	0.298755
sp|Q00898|A1AT5_MOUSE Alpha-1-antitrypsin 1-5 OS=Mus musculus GN=Serpina1e PE=1 SV=1	28.03	29.5086	30.9041	31.5301	29.5862	31.581	31.8663	31.1565	29.9932	31.0475	0.966042	0.300284
tr|Q3U5U5|Q3U5U5_MOUSE Adenosylhomocysteinase OS=Mus musculus PE=2 SV=1;tr|Q3U4D1|Q3U4D1_MOUSE Adenosylhomocysteinase OS=Mus musculus PE=2 SV=1;tr|Q3TF14|Q3TF14_MOUSE Adenosylhomocysteinase OS=Mus musculus GN=Ahcy PE=1 SV=1;sp|P50247|SAHH_MOUSE Adenosylhom	26.1238	25.9732	25.7585	25.7435	25.7346	25.8469	25.863	25.7028	25.8997	25.7868	1.00438	0.3003
sp|Q9DBB9|CPN2_MOUSE Carboxypeptidase N subunit 2 OS=Mus musculus GN=Cpn2 PE=1 SV=2;tr|Q642I5|Q642I5_MOUSE Cpn2 protein (Fragment) OS=Mus musculus GN=Cpn2 PE=2 SV=1	26.0856	26.1613	25.6529	26.5332	25.99	26.7208	26.4176	26.3659	26.1083	26.3736	0.989941	0.301476
tr|Q3U8F7|Q3U8F7_MOUSE Uncharacterized protein OS=Mus musculus GN=Npc2 PE=2 SV=1;tr|Q3U3C2|Q3U3C2_MOUSE Uncharacterized protein OS=Mus musculus GN=Npc2 PE=2 SV=1;sp|Q9Z0J0|NPC2_MOUSE Epididymal secretory protein E1 OS=Mus musculus GN=Npc2 PE=1 SV=1;tr|Q3TX	26.0355	26.6687	26.3449	26.1396	27.2009	26.3447	26.2172	26.5919	26.2972	26.5887	0.989036	0.303635
sp|P56376|ACYP1_MOUSE Acylphosphatase-1 OS=Mus musculus GN=Acyp1 PE=1 SV=2;tr|Q4VAF0|Q4VAF0_MOUSE Acylphosphatase (Fragment) OS=Mus musculus GN=Acyp1 PE=2 SV=1;tr|E9QJT5|E9QJT5_MOUSE Acylphosphatase OS=Mus musculus GN=Acyp1 PE=1 SV=1	24.7509	24.5117	24.786	24.5414	24.3523	25.1002	24.9041	25.0742	24.6475	24.8577	0.991544	0.305598
sp|P97298|PEDF_MOUSE Pigment epithelium-derived factor OS=Mus musculus GN=Serpinf1 PE=1 SV=2	29.8346	30.0013	29.7981	29.8488	30.0107	29.391	29.4204	29.9114	29.8707	29.6834	1.00631	0.306921
sp|P17751|TPIS_MOUSE Triosephosphate isomerase OS=Mus musculus GN=Tpi1 PE=1 SV=4;tr|H7BXC3|H7BXC3_MOUSE Triosephosphate isomerase OS=Mus musculus GN=Tpi1 PE=1 SV=1	32.8093	32.3771	32.9214	32.1146	31.8766	31.9273	32.6438	32.5577	32.5556	32.2513	1.00943	0.313381
sp|Q60963|PAFA_MOUSE Platelet-activating factor acetylhydrolase OS=Mus musculus GN=Pla2g7 PE=2 SV=2;tr|Q9DB74|Q9DB74_MOUSE Platelet-activating factor acetylhydrolase OS=Mus musculus GN=Pla2g7 PE=2 SV=1;tr|E9Q330|E9Q330_MOUSE Platelet-activating factor acet	27.3632	28.246	27.5553	27.5298	27.9163	27.3991	26.8127	27.3062	27.6736	27.3586	1.01151	0.332511
sp|P97290|IC1_MOUSE Plasma protease C1 inhibitor OS=Mus musculus GN=Serping1 PE=1 SV=3;tr|A2ATR8|A2ATR8_MOUSE Plasma protease C1 inhibitor OS=Mus musculus GN=Serping1 PE=1 SV=1	28.3396	28.7333	28.5223	28.8661	28.7718	28.4632	28.2716	28.2525	28.6153	28.4398	1.00617	0.334372
tr|Q5FW62|Q5FW62_MOUSE Serine (Or cysteine) peptidase inhibitor, clade D, member 1 OS=Mus musculus GN=Serpind1 PE=2 SV=1;sp|P49182|HEP2_MOUSE Heparin cofactor 2 OS=Mus musculus GN=Serpind1 PE=1 SV=1	27.4377	27.4233	27.4798	27.5849	27.5642	27.3265	27.0817	27.4888	27.4814	27.3653	1.00424	0.343131
sp|P17563|SBP1_MOUSE Selenium-binding protein 1 OS=Mus musculus GN=Selenbp1 PE=1 SV=2;sp|Q63836|SBP2_MOUSE Selenium-binding protein 2 OS=Mus musculus GN=Selenbp2 PE=1 SV=2;tr|A0A0R4J135|A0A0R4J135_MOUSE Selenium-binding protein 2 OS=Mus musculus GN=Selenbp	27.7087	27.5555	27.651	26.9358	27.131	27.3109	27.525	27.0297	27.4627	27.2492	1.00784	0.346281
sp|P10649|GSTM1_MOUSE Glutathione S-transferase Mu 1 OS=Mus musculus GN=Gstm1 PE=1 SV=2;tr|A2AE89|A2AE89_MOUSE Glutathione S-transferase Mu 1 OS=Mus musculus GN=Gstm1 PE=1 SV=2	29.9389	29.7925	30.0785	29.1233	29.4878	29.0121	29.7627	29.5971	29.7333	29.4649	1.00911	0.351853
tr|Q8C7C3|Q8C7C3_MOUSE Uncharacterized protein OS=Mus musculus GN=Tpm3 PE=2 SV=1;tr|Q58E70|Q58E70_MOUSE Tpm3 protein OS=Mus musculus GN=Tpm3 PE=2 SV=1;tr|Q3TJ53|Q3TJ53_MOUSE Uncharacterized protein OS=Mus musculus GN=Tpm3 PE=2 SV=1;tr|D3Z2H9|D3Z2H9_MOUSE T	26.4277	25.6801	26.1628	25.2242	25.3124	26.0368	25.4005	25.4959	25.8737	25.5614	1.01222	0.355485
tr|Q5EBQ2|Q5EBQ2_MOUSE MCG7941, isoform CRA_f OS=Mus musculus GN=Pebp1 PE=1 SV=1;tr|Q3TGC5|Q3TGC5_MOUSE Uncharacterized protein OS=Mus musculus GN=Pebp1 PE=2 SV=1;sp|P70296|PEBP1_MOUSE Phosphatidylethanolamine-binding protein 1 OS=Mus musculus GN=Pebp1 PE=	30.2751	29.7876	30.1801	29.7399	29.4322	29.7072	29.9117	30.143	29.9957	29.7985	1.00662	0.369068
sp|Q04447|KCRB_MOUSE Creatine kinase B-type OS=Mus musculus GN=Ckb PE=1 SV=1	30.2695	29.4574	29.3769	29.5996	29.0755	30.6798	30.6378	29.9615	29.6759	30.0887	0.98628	0.371091
sp|Q99PT1|GDIR1_MOUSE Rho GDP-dissociation inhibitor 1 OS=Mus musculus GN=Arhgdia PE=1 SV=3	28.2038	27.5867	28.1975	27.1921	27.5651	27.3782	27.7696	27.4563	27.795	27.5423	1.00917	0.371751
sp|Q61361|PGCB_MOUSE Brevican core protein OS=Mus musculus GN=Bcan PE=1 SV=2	27.8895	28.3078	27.9916	28.1699	28.4699	27.5975	27.6004	27.823	28.0897	27.8727	1.00779	0.373975
tr|A0A0R4J038|A0A0R4J038_MOUSE Kininogen-1 OS=Mus musculus GN=Kng1 PE=1 SV=1;sp|O08677|KNG1_MOUSE Kininogen-1 OS=Mus musculus GN=Kng1 PE=1 SV=1;tr|D3YTY9|D3YTY9_MOUSE Kininogen-1 OS=Mus musculus GN=Kng1 PE=1 SV=1	32.1542	32.0104	32.4062	32.6496	32.3628	32.0127	32.128	32.1065	32.3051	32.1525	1.00475	0.375383
tr|A2NHM3|A2NHM3_MOUSE If kappa light chain (Fragment) OS=Mus musculus GN=Igkc PE=1 SV=1	31.3978	31.9458	31.4065	31.9712	33.0127	31.1605	32.3293	31.8345	31.6803	32.0842	0.987411	0.376563
tr|Q3U5K7|Q3U5K7_MOUSE Cystatin (Fragment) OS=Mus musculus GN=Cst3 PE=2 SV=1;sp|P21460|CYTC_MOUSE Cystatin-C OS=Mus musculus GN=Cst3 PE=1 SV=2;tr|Q9EPX9|Q9EPX9_MOUSE Cystatin OS=Mus musculus GN=Cst3 PE=2 SV=1;tr|A2APX3|A2APX3_MOUSE Cystatin (Fragment) OS=M	33.5696	34.2425	34.0391	33.8936	34.6115	33.7288	33.9131	34.4645	33.9362	34.1795	0.992882	0.377511
tr|Q543K9|Q543K9_MOUSE Purine nucleoside phosphorylase OS=Mus musculus GN=Pnp PE=1 SV=1;sp|P23492|PNPH_MOUSE Purine nucleoside phosphorylase OS=Mus musculus GN=Pnp PE=1 SV=2;tr|Q9D8C9|Q9D8C9_MOUSE Purine nucleoside phosphorylase OS=Mus musculus GN=Pnp2 PE=	27.3527	26.2819	27.1098	27.1063	26.3069	28.3426	27.3512	27.6899	26.9627	27.4226	0.983226	0.379773
tr|D3YYN7|D3YYN7_MOUSE Sodium/potassium-transporting ATPase subunit alpha OS=Mus musculus GN=Atp1a2 PE=1 SV=1;tr|Q3UHK5|Q3UHK5_MOUSE Sodium/potassium-transporting ATPase subunit alpha OS=Mus musculus GN=Atp1a2 PE=1 SV=1;sp|Q6PIE5|AT1A2_MOUSE Sodium/potassi	28.5993	29.3287	28.4161	28.1061	28.4406	28.0929	29.0068	27.1175	28.6126	28.1645	1.01591	0.380862
tr|D2KHZ9|D2KHZ9_MOUSE Glyceraldehyde-3-phosphate dehydrogenase OS=Mus musculus GN=GAPDH PE=2 SV=1;sp|P16858|G3P_MOUSE Glyceraldehyde-3-phosphate dehydrogenase OS=Mus musculus GN=Gapdh PE=1 SV=2;tr|A0A0A0MQF6|A0A0A0MQF6_MOUSE Glyceraldehyde-3-phosphate deh	32.5219	32.8046	32.6531	31.3073	32.5903	32.5535	33.0698	32.45	32.3217	32.6659	0.989464	0.38782
tr|Q3TJ94|Q3TJ94_MOUSE Prothrombin OS=Mus musculus GN=F2 PE=1 SV=1;sp|P19221|THRB_MOUSE Prothrombin OS=Mus musculus GN=F2 PE=1 SV=1;tr|H7BX99|H7BX99_MOUSE Prothrombin OS=Mus musculus GN=F2 PE=1 SV=1	29.4804	29.4757	29.6729	29.7168	29.8199	29.7979	29.4485	29.6631	29.5865	29.6824	0.996769	0.401378
tr|Q3TAZ7|Q3TAZ7_MOUSE Uncharacterized protein OS=Mus musculus GN=Csf1r PE=2 SV=1;tr|Q3U4N8|Q3U4N8_MOUSE Receptor protein-tyrosine kinase (Fragment) OS=Mus musculus GN=Csf1r PE=2 SV=1;tr|Q3U1X4|Q3U1X4_MOUSE Receptor protein-tyrosine kinase (Fragment) OS=Mu	26.6614	27.1974	26.9119	27.1923	27.6794	26.9815	26.9654	27.0805	26.9908	27.1767	0.993158	0.415496
tr|Q3UH39|Q3UH39_MOUSE Uncharacterized protein OS=Mus musculus GN=Cntn2 PE=2 SV=1;sp|Q61330|CNTN2_MOUSE Contactin-2 OS=Mus musculus GN=Cntn2 PE=1 SV=2;tr|Q3UGZ2|Q3UGZ2_MOUSE Uncharacterized protein OS=Mus musculus GN=Cntn2 PE=2 SV=1;tr|A0A087WQQ9|A0A087WQQ	25.346	26.4941	25.8074	26.3522	26.6846	25.8528	26.1469	26.4127	25.9999	26.2742	0.98956	0.421637
tr|Q3UBP0|Q3UBP0_MOUSE Adenylosuccinate synthetase isozyme 1 OS=Mus musculus GN=Adssl1 PE=2 SV=1;sp|P28650|PURA1_MOUSE Adenylosuccinate synthetase isozyme 1 OS=Mus musculus GN=Adssl1 PE=1 SV=2;tr|J3QN31|J3QN31_MOUSE Adenylosuccinate synthetase isozyme 1 OS	28.3403	28.0695	28.3073	27.4556	27.0072	27.1882	28.6429	27.8791	28.0432	27.6793	1.01315	0.424581
sp|P68134|ACTS_MOUSE Actin, alpha skeletal muscle OS=Mus musculus GN=Acta1 PE=1 SV=1;tr|Q9CXK3|Q9CXK3_MOUSE Uncharacterized protein OS=Mus musculus GN=Actc1 PE=2 SV=1;tr|Q497E4|Q497E4_MOUSE Actin, alpha, cardiac muscle 1 OS=Mus musculus GN=Actc1 PE=2 SV=1;	31.8177	31.615	31.7819	31.1467	31.3485	31.1461	31.7989	31.36	31.5903	31.4134	1.00563	0.424907
sp|P47879|IBP4_MOUSE Insulin-like growth factor-binding protein 4 OS=Mus musculus GN=Igfbp4 PE=1 SV=2;tr|H3BLB7|H3BLB7_MOUSE Insulin-like growth factor-binding protein 4 OS=Mus musculus GN=Igfbp4 PE=1 SV=1;tr|Q8BSM9|Q8BSM9_MOUSE Uncharacterized protein OS=	26.2637	26.9661	26.7672	26.4101	27.0113	26.0576	26.1851	26.2317	26.6018	26.3714	1.00874	0.425853
tr|Q9D8L4|Q9D8L4_MOUSE Uncharacterized protein OS=Mus musculus PE=1 SV=1	28.954	29.8651	28.9614	30.1643	29.9127	29.4729	30.7279	29.3317	29.4862	29.8613	0.987439	0.428914
tr|Q3U0Z1|Q3U0Z1_MOUSE Uncharacterized protein OS=Mus musculus GN=Coch PE=2 SV=1;sp|Q62507|COCH_MOUSE Cochlin OS=Mus musculus GN=Coch PE=1 SV=2	27.0979	27.4143	27.7951	27.7475	27.4755	27.0855	28.4746	28.1654	27.5137	27.8002	0.989692	0.451563
sp|O88968|TCO2_MOUSE Transcobalamin-2 OS=Mus musculus GN=Tcn2 PE=1 SV=1	25.8491	26.2397	25.6561	25.789	26.2813	25.4691	25.4956	25.5461	25.8835	25.698	1.00722	0.454333
tr|A0A075B5P6|A0A075B5P6_MOUSE Ig mu chain C region (Fragment) OS=Mus musculus GN=Ighm PE=1 SV=1;sp|P01872|IGHM_MOUSE Ig mu chain C region OS=Mus musculus GN=Ighm PE=1 SV=2;tr|A0A075B6A0|A0A075B6A0_MOUSE Ig mu chain C region (Fragment) OS=Mus musculus GN=I	31.918	33.1329	31.5717	31.986	34.8689	31.1341	33.1146	32.1851	32.1521	32.8257	0.979482	0.464183
tr|Q5NC82|Q5NC82_MOUSE Nucleoside diphosphate kinase OS=Mus musculus GN=Nme2 PE=2 SV=1;sp|Q01768|NDKB_MOUSE Nucleoside diphosphate kinase B OS=Mus musculus GN=Nme2 PE=1 SV=1;tr|E9PZF0|E9PZF0_MOUSE Nucleoside diphosphate kinase OS=Mus musculus GN=Gm20390 PE	29.2488	29.1699	29.5463	28.6963	28.287	28.9264	29.3575	29.1795	29.1653	28.9376	1.00787	0.466616
sp|Q9R1E6|ENPP2_MOUSE Ectonucleotide pyrophosphatase/phosphodiesterase family member 2 OS=Mus musculus GN=Enpp2 PE=1 SV=3;tr|G3UXY9|G3UXY9_MOUSE Ectonucleotide pyrophosphatase/phosphodiesterase family member 2 OS=Mus musculus GN=Enpp2 PE=1 SV=1	33.696	34.0985	34.0922	34.1974	34.3815	33.7698	34.1249	34.3704	34.021	34.1616	0.995884	0.467605
sp|Q5SX40|MYH1_MOUSE Myosin-1 OS=Mus musculus GN=Myh1 PE=1 SV=1;tr|B2RWX0|B2RWX0_MOUSE Myosin, heavy polypeptide 1, skeletal muscle, adult OS=Mus musculus GN=Myh1 PE=2 SV=1	29.4166	30.7578	29.4677	24.8352	28.5563	25.6809	28.5506	27.1393	28.6193	27.4818	1.04139	0.468189
sp|P46412|GPX3_MOUSE Glutathione peroxidase 3 OS=Mus musculus GN=Gpx3 PE=1 SV=2;tr|A0A1C7ZMZ5|A0A1C7ZMZ5_MOUSE Glutathione peroxidase (Fragment) OS=Mus musculus GN=Gpx3 PE=1 SV=1;tr|A0A1C7ZMZ7|A0A1C7ZMZ7_MOUSE Glutathione peroxidase 3 (Fragment) OS=Mus mus	28.034	27.9321	28.2073	28.109	27.5649	28.1225	27.8213	28.2652	28.0706	27.9435	1.00455	0.475214
sp|P40142|TKT_MOUSE Transketolase OS=Mus musculus GN=Tkt PE=1 SV=1;tr|A0A286YE28|A0A286YE28_MOUSE Transketolase (Fragment) OS=Mus musculus GN=Tkt PE=4 SV=1	27.9612	27.4139	27.8559	27.2977	27.0372	27.6662	27.7797	27.3659	27.6322	27.4623	1.00619	0.492893
tr|Q549A5|Q549A5_MOUSE Clusterin OS=Mus musculus GN=Clu PE=1 SV=1;sp|Q06890|CLUS_MOUSE Clusterin OS=Mus musculus GN=Clu PE=1 SV=1;tr|Q9JK98|Q9JK98_MOUSE Clusterin OS=Mus musculus GN=Clu PE=2 SV=1;tr|E9PUU2|E9PUU2_MOUSE Clusterin (Fragment) OS=Mus musculus	31.8068	32.7106	32.379	32.2387	32.7235	31.842	31.7215	31.9958	32.2838	32.0707	1.00664	0.493809
tr|Q9D288|Q9D288_MOUSE Uncharacterized protein OS=Mus musculus PE=2 SV=1;tr|Q544K5|Q544K5_MOUSE C-type natriuretic peptide OS=Mus musculus GN=Nppc PE=2 SV=1;sp|Q61839|ANFC_MOUSE C-type natriuretic peptide OS=Mus musculus GN=Nppc PE=3 SV=1	25.7491	26.2949	25.8645	25.8061	26.4378	25.4109	25.2228	25.7881	25.9286	25.7149	1.00831	0.496711
sp|P15626|GSTM2_MOUSE Glutathione S-transferase Mu 2 OS=Mus musculus GN=Gstm2 PE=1 SV=2;tr|D3YX76|D3YX76_MOUSE Glutathione S-transferase OS=Mus musculus GN=Gstm2 PE=1 SV=1	26.8221	26.6732	26.7669	26.2571	26.3411	25.8801	26.92	26.6436	26.6298	26.4462	1.00694	0.501541
tr|A8DUQ1|A8DUQ1_MOUSE Beta-globin OS=Mus musculus GN=Hbbt1 PE=3 SV=1	34.3087	33.9525	34.5886	34.1498	33.4325	35.3697	34.37	35.1237	34.2499	34.574	0.990626	0.504028
tr|Q543R4|Q543R4_MOUSE Uncharacterized protein OS=Mus musculus GN=Cpe PE=1 SV=1;sp|Q00493|CBPE_MOUSE Carboxypeptidase E OS=Mus musculus GN=Cpe PE=1 SV=2	28.2977	28.485	28.5443	28.1346	28.5969	28.4612	28.1703	28.6311	28.3654	28.4649	0.996505	0.5047
sp|P09411|PGK1_MOUSE Phosphoglycerate kinase 1 OS=Mus musculus GN=Pgk1 PE=1 SV=4;tr|S4R2M7|S4R2M7_MOUSE Phosphoglycerate kinase OS=Mus musculus GN=Pgk1 PE=1 SV=1	31.0348	30.5961	31.1066	30.3666	30.3102	30.2475	30.9105	30.9158	30.776	30.596	1.00588	0.506776
sp|Q64726|ZA2G_MOUSE Zinc-alpha-2-glycoprotein OS=Mus musculus GN=Azgp1 PE=1 SV=2	27.5231	27.9235	28.0709	28.288	28.2359	27.9938	27.8567	28.2214	27.9514	28.077	0.995528	0.523918
sp|P70274|SEPP1_MOUSE Selenoprotein P OS=Mus musculus GN=Selenop PE=1 SV=3;tr|E0CZC5|E0CZC5_MOUSE Selenoprotein P (Fragment) OS=Mus musculus GN=Selenop PE=1 SV=1;tr|E0CX80|E0CX80_MOUSE Selenoprotein P (Fragment) OS=Mus musculus GN=Selenop PE=1 SV=1	26.2347	25.5475	26.2543	26.0611	25.3605	25.8352	26.0428	26.1996	26.0244	25.8595	1.00638	0.527236
sp|Q9R0Y5|KAD1_MOUSE Adenylate kinase isoenzyme 1 OS=Mus musculus GN=Ak1 PE=1 SV=1	30.7182	30.4087	31.2422	29.616	30.017	29.793	30.4139	30.7006	30.4963	30.2311	1.00877	0.527833
sp|P15327|PMGE_MOUSE Bisphosphoglycerate mutase OS=Mus musculus GN=Bpgm PE=1 SV=2;tr|Q3TAQ8|Q3TAQ8_MOUSE Phosphoglycerate mutase OS=Mus musculus GN=Bpgm PE=2 SV=1;tr|D3Z223|D3Z223_MOUSE Phosphoglycerate mutase (Fragment) OS=Mus musculus GN=Bpgm PE=1 SV=1	28.721	28.6369	28.7309	27.9277	27.7512	29.8854	28.513	29.194	28.5041	28.8359	0.988495	0.528908
sp|P52480|KPYM_MOUSE Pyruvate kinase PKM OS=Mus musculus GN=Pkm PE=1 SV=4;tr|A0A1L1SU37|A0A1L1SU37_MOUSE Pyruvate kinase PKM (Fragment) OS=Mus musculus GN=Pkm PE=1 SV=1	31.9198	31.8776	32.0464	31.2056	31.2301	31.1651	32.0796	31.7971	31.7624	31.568	1.00616	0.529606
tr|Q5FWB7|Q5FWB7_MOUSE Fructose-bisphosphate aldolase OS=Mus musculus GN=Aldoa PE=1 SV=1;sp|P05064|ALDOA_MOUSE Fructose-bisphosphate aldolase A OS=Mus musculus GN=Aldoa PE=1 SV=2;tr|Q6NY00|Q6NY00_MOUSE Fructose-bisphosphate aldolase OS=Mus musculus GN=Aldo	33.8618	33.9589	34.2681	33.0268	33.007	33.2086	34.1281	33.7878	33.7789	33.5329	1.00734	0.531106
sp|P21550|ENOB_MOUSE Beta-enolase OS=Mus musculus GN=Eno3 PE=1 SV=3;tr|Q4FK59|Q4FK59_MOUSE Eno3 protein OS=Mus musculus GN=Eno3 PE=2 SV=1;tr|Q5SX59|Q5SX59_MOUSE Beta-enolase (Fragment) OS=Mus musculus GN=Eno3 PE=1 SV=1	32.771	31.9352	32.7775	31.8418	31.3852	31.7457	32.6726	32.4712	32.3314	32.0687	1.00819	0.532254
sp|P26339|CMGA_MOUSE Chromogranin-A OS=Mus musculus GN=Chga PE=1 SV=1;tr|Q3UN28|Q3UN28_MOUSE Uncharacterized protein OS=Mus musculus GN=Chga PE=2 SV=1	30.7117	31.4631	31.0006	31.1931	31.5708	30.69	30.596	30.7923	31.0921	30.9123	1.00582	0.535374
tr|A5GZX3|A5GZX3_MOUSE Lactoylglutathione lyase OS=Mus musculus GN=Glo1 PE=1 SV=1;sp|Q9CPU0|LGUL_MOUSE Lactoylglutathione lyase OS=Mus musculus GN=Glo1 PE=1 SV=3	27.9269	27.2708	27.8568	27.502	26.8226	27.5976	27.6561	27.7825	27.6391	27.4647	1.00635	0.537074
tr|Q3TT51|Q3TT51_MOUSE Secretogranin V, isoform CRA_b OS=Mus musculus GN=Scg5 PE=1 SV=1;sp|P12961|7B2_MOUSE Neuroendocrine protein 7B2 OS=Mus musculus GN=Scg5 PE=1 SV=1	29.0998	29.8577	29.3946	29.2886	29.6624	28.9115	29.149	29.3312	29.4102	29.2635	1.00501	0.540234
sp|P63242|IF5A1_MOUSE Eukaryotic translation initiation factor 5A-1 OS=Mus musculus GN=Eif5a PE=1 SV=2;tr|A0A0A0MQM0|A0A0A0MQM0_MOUSE Eukaryotic translation initiation factor 5A (Fragment) OS=Mus musculus GN=Eif5a PE=1 SV=1	27.7768	26.6417	27.5416	26.1455	25.7535	27.3894	26.6235	27.0145	27.0264	26.6952	1.01241	0.546713
tr|A0A087WSN6|A0A087WSN6_MOUSE Fibronectin OS=Mus musculus GN=Fn1 PE=1 SV=1;tr|B9EHT6|B9EHT6_MOUSE Fibronectin OS=Mus musculus GN=Fn1 PE=1 SV=1;tr|Q3UGY5|Q3UGY5_MOUSE Uncharacterized protein OS=Mus musculus GN=Fn1 PE=2 SV=1;tr|A0A087WR50|A0A087WR50_MOUSE F	29.6192	30.5048	30.384	30.2231	30.6174	30.2351	29.3905	29.6131	30.1828	29.964	1.0073	0.547748
sp|P01898|HA10_MOUSE H-2 class I histocompatibility antigen, Q10 alpha chain OS=Mus musculus GN=H2-Q10 PE=1 SV=3	25.7911	26.6619	26.1859	26.5067	26.0909	26.3194	26.8459	26.5253	26.2864	26.4454	0.993989	0.549166
tr|A0A0A6YY91|A0A0A6YY91_MOUSE Neural cell adhesion molecule 1 (Fragment) OS=Mus musculus GN=Ncam1 PE=1 SV=1	28.7049	29.3599	29.012	29.0988	29.4252	28.8442	28.6061	28.7315	29.0439	28.9018	1.00492	0.552394
sp|P47877|IBP2_MOUSE Insulin-like growth factor-binding protein 2 OS=Mus musculus GN=Igfbp2 PE=2 SV=2;tr|Q9D057|Q9D057_MOUSE Uncharacterized protein OS=Mus musculus GN=Igfbp2 PE=2 SV=1	30.1208	31.1944	30.7143	30.5531	31.0415	30.1374	30.0798	30.5544	30.6456	30.4533	1.00632	0.562998
tr|A8DUL0|A8DUL0_MOUSE Beta-globin OS=Mus musculus GN=Hbbt1 PE=3 SV=1	37.5574	36.9399	37.3663	37.2394	36.4245	38.3572	37.349	38.0721	37.2758	37.5507	0.992678	0.563891
tr|Q546G4|Q546G4_MOUSE Albumin 1 OS=Mus musculus GN=Alb PE=1 SV=1;sp|P07724|ALBU_MOUSE Serum albumin OS=Mus musculus GN=Alb PE=1 SV=3	38.5964	38.508	38.927	39.2334	39.257	38.8561	38.7072	38.9382	38.8162	38.9396	0.996831	0.564337
tr|Q3U6G1|Q3U6G1_MOUSE Biliverdin reductase B (Flavin reductase (NADPH)) OS=Mus musculus GN=Blvrb PE=1 SV=1;sp|Q923D2|BLVRB_MOUSE Flavin reductase (NADPH) OS=Mus musculus GN=Blvrb PE=1 SV=3;tr|E9PZC3|E9PZC3_MOUSE Flavin reductase (NADPH) OS=Mus musculus GN	29.4452	28.672	29.5112	29.2521	28.4713	30.4003	29.1087	30.0682	29.2201	29.5121	0.990106	0.566377
sp|E9PV24|FIBA_MOUSE Fibrinogen alpha chain OS=Mus musculus GN=Fga PE=1 SV=1	28.9321	28.9899	28.8463	29.1444	29.5843	28.8423	28.7945	29.1552	28.9782	29.094	0.996017	0.569137
tr|Q3UH37|Q3UH37_MOUSE Uncharacterized protein OS=Mus musculus GN=Nptxr PE=2 SV=1;tr|B9EIV5|B9EIV5_MOUSE Neuronal pentraxin receptor OS=Mus musculus GN=Nptxr PE=2 SV=1;tr|F7BX42|F7BX42_MOUSE Neuronal pentraxin receptor OS=Mus musculus GN=Nptxr PE=1 SV=1;tr	27.525	28.3628	27.9259	28.0461	28.5232	27.8951	27.7291	28.3035	27.965	28.1127	0.994744	0.57835
tr|Q5EBJ0|Q5EBJ0_MOUSE Fatty acid binding protein 3, muscle and heart OS=Mus musculus GN=Fabp3 PE=1 SV=1;sp|P11404|FABPH_MOUSE Fatty acid-binding protein, heart OS=Mus musculus GN=Fabp3 PE=1 SV=5	31.2447	31.3916	31.4349	30.6043	30.341	30.102	31.6059	31.5854	31.1689	30.9086	1.00842	0.578693
tr|B9EHN0|B9EHN0_MOUSE Ubiquitin-activating enzyme E1, Chr X OS=Mus musculus GN=Uba1 PE=1 SV=1;sp|Q02053|UBA1_MOUSE Ubiquitin-like modifier-activating enzyme 1 OS=Mus musculus GN=Uba1 PE=1 SV=1;tr|A0A1S6GWH5|A0A1S6GWH5_MOUSE Uncharacterized protein OS=Mus	27.0236	26.4756	26.7903	25.5697	25.3509	26.4091	26.7748	26.2931	26.4648	26.207	1.00984	0.579248
tr|Q3UBA6|Q3UBA6_MOUSE Uncharacterized protein OS=Mus musculus GN=Hspa8 PE=2 SV=1;tr|Q3TZJ3|Q3TZJ3_MOUSE Uncharacterized protein OS=Mus musculus GN=Hspa8 PE=2 SV=1;tr|Q3TH56|Q3TH56_MOUSE Uncharacterized protein OS=Mus musculus GN=Hspa8 PE=2 SV=1;tr|Q3TEK2|	29.7951	29.8426	29.4488	28.878	28.7543	29.2462	30.0074	29.1541	29.4911	29.2905	1.00685	0.580454
tr|Q3UST4|Q3UST4_MOUSE Uncharacterized protein (Fragment) OS=Mus musculus GN=Nptx1 PE=2 SV=1;tr|A2ACL9|A2ACL9_MOUSE Neuronal pentraxin 1 OS=Mus musculus GN=Nptx1 PE=1 SV=1;sp|Q62443|NPTX1_MOUSE Neuronal pentraxin-1 OS=Mus musculus GN=Nptx1 PE=1 SV=1	27.3103	27.8126	27.3444	27.7309	27.812	27.1788	27.1984	27.5506	27.5495	27.435	1.00418	0.586992
tr|Q8BPF4|Q8BPF4_MOUSE Uncharacterized protein OS=Mus musculus PE=2 SV=1;tr|Q9QWJ3|Q9QWJ3_MOUSE Alpha-1-globin (Fragment) OS=Mus musculus PE=2 SV=1	36.9003	36.4626	36.683	36.7791	36.187	37.5382	36.5796	37.2603	36.7063	36.8913	0.994984	0.58735
sp|Q9QUN9|DKK3_MOUSE Dickkopf-related protein 3 OS=Mus musculus GN=Dkk3 PE=2 SV=1	28.8046	29.4791	29.2982	29.2027	29.7522	29.1383	29.073	29.299	29.1961	29.3157	0.995923	0.588448
sp|P12960|CNTN1_MOUSE Contactin-1 OS=Mus musculus GN=Cntn1 PE=1 SV=1	27.8539	28.2922	28.1136	28.2704	28.5661	28.3946	28.1282	27.8618	28.1325	28.2377	0.996276	0.589318
sp|P35700|PRDX1_MOUSE Peroxiredoxin-1 OS=Mus musculus GN=Prdx1 PE=1 SV=1;tr|B1AXW5|B1AXW5_MOUSE Peroxiredoxin-1 (Fragment) OS=Mus musculus GN=Prdx1 PE=1 SV=8;tr|B1AXW6|B1AXW6_MOUSE Peroxiredoxin-1 (Fragment) OS=Mus musculus GN=Prdx1 PE=1 SV=1;tr|Q3U9J9|Q3U	28.6599	28.8537	28.8781	27.1287	27.0829	28.2578	28.6778	28.2671	28.3801	28.0714	1.011	0.590113
tr|Q5SS40|Q5SS40_MOUSE Tyrosine 3-monooxygenase/tryptophan 5-monooxygenase activation protein, epsilon polypeptide, isoform CRA_c OS=Mus musculus GN=Ywhae PE=1 SV=1;sp|P62259|1433E_MOUSE 14-3-3 protein epsilon OS=Mus musculus GN=Ywhae PE=1 SV=1;tr|Q8BPH1|Q	28.3194	27.9497	27.9939	27.3892	27.0924	27.6551	28.3614	27.8251	27.9131	27.7335	1.00647	0.60055
sp|P06745|G6PI_MOUSE Glucose-6-phosphate isomerase OS=Mus musculus GN=Gpi PE=1 SV=4;tr|B7ZWL9|B7ZWL9_MOUSE Glucose-6-phosphate isomerase OS=Mus musculus GN=Gpi1 PE=2 SV=1;tr|B2RXT5|B2RXT5_MOUSE Glucose-6-phosphate isomerase OS=Mus musculus GN=Gpi1 PE=2 SV=	30.1986	29.9519	30.3024	29.5277	29.4409	29.5802	30.3717	29.987	29.9951	29.845	1.00503	0.60068
sp|Q61129|CFAI_MOUSE Complement factor I OS=Mus musculus GN=Cfi PE=1 SV=3	28.4267	28.3058	28.6193	28.9357	28.821	28.7455	28.4681	28.5936	28.5719	28.6571	0.997027	0.609934
sp|Q61220|NELL2_MOUSE Protein kinase C-binding protein NELL2 OS=Mus musculus GN=Nell2 PE=1 SV=3;tr|Q8BM43|Q8BM43_MOUSE Uncharacterized protein (Fragment) OS=Mus musculus GN=Nell2 PE=2 SV=1;tr|Q8BM06|Q8BM06_MOUSE Uncharacterized protein OS=Mus musculus GN=N	27.1733	27.7737	27.3722	27.451	28.3891	27.4607	27.0363	27.5385	27.4426	27.6061	0.994074	0.616248
tr|Q3UEK9|Q3UEK9_MOUSE Alpha-2-HS-glycoprotein, isoform CRA_a OS=Mus musculus GN=Ahsg PE=1 SV=1;tr|Q3UEK5|Q3UEK5_MOUSE Uncharacterized protein OS=Mus musculus GN=Ahsg PE=2 SV=1;tr|Q3TIU3|Q3TIU3_MOUSE Uncharacterized protein OS=Mus musculus GN=Ahsg PE=2 SV=	32.4331	31.7258	33.0193	32.8774	32.6725	32.7386	32.6949	32.5681	32.5139	32.6685	0.995268	0.616786
sp|O88783|FA5_MOUSE Coagulation factor V OS=Mus musculus GN=F5 PE=1 SV=1	24.9129	26.1158	26.2074	26.6668	26.362	25.0584	25.4631	26.0227	25.9757	25.7265	1.00969	0.617424
sp|P16015|CAH3_MOUSE Carbonic anhydrase 3 OS=Mus musculus GN=Ca3 PE=1 SV=3	32.3915	31.7985	32.5636	31.2348	31.9687	31.5261	31.2885	32.3897	31.9971	31.7932	1.00641	0.6185
tr|A0A1W2P7Y9|A0A1W2P7Y9_MOUSE Neuronal cell adhesion molecule OS=Mus musculus GN=Nrcam PE=1 SV=1;sp|Q810U4|NRCAM_MOUSE Neuronal cell adhesion molecule OS=Mus musculus GN=Nrcam PE=1 SV=2	27.7376	28.5185	28.2207	28.2084	28.8634	28.0573	28.0207	28.2691	28.1713	28.3026	0.99536	0.622186
sp|P62631|EF1A2_MOUSE Elongation factor 1-alpha 2 OS=Mus musculus GN=Eef1a2 PE=1 SV=1	28.9284	28.947	29.004	27.5087	28.1769	27.9878	28.9367	28.4217	28.597	28.3808	1.00762	0.622831
tr|Q5ND36|Q5ND36_MOUSE Serine (Or cysteine) peptidase inhibitor, clade F, member 2, isoform CRA_c OS=Mus musculus GN=Serpinf2 PE=1 SV=1;sp|Q61247|A2AP_MOUSE Alpha-2-antiplasmin OS=Mus musculus GN=Serpinf2 PE=1 SV=1;tr|Q5ND35|Q5ND35_MOUSE Alpha-2-antiplasmi	27.771	27.8987	27.6374	28.391	28.2906	28.0612	27.7541	28.0016	27.9245	28.0269	0.996349	0.623598
tr|Q544Y7|Q544Y7_MOUSE Cofilin 1, non-muscle OS=Mus musculus GN=Cfl1 PE=2 SV=1;sp|P18760|COF1_MOUSE Cofilin-1 OS=Mus musculus GN=Cfl1 PE=1 SV=3;tr|F8WGL3|F8WGL3_MOUSE Cofilin-1 OS=Mus musculus GN=Cfl1 PE=1 SV=1;tr|Q9CX22|Q9CX22_MOUSE Uncharacterized protei	27.9678	27.1846	27.6424	27.1595	26.9154	27.5045	27.4725	27.5568	27.4886	27.3623	1.00462	0.625542
tr|Q61482|Q61482_MOUSE CDE1-binding protein CDEBP OS=Mus musculus GN=Aplp2 PE=4 SV=1;tr|Q60709|Q60709_MOUSE Amyloid-like protein 2 OS=Mus musculus GN=Aplp2 PE=1 SV=1;tr|Q3UDL6|Q3UDL6_MOUSE Uncharacterized protein OS=Mus musculus GN=Aplp2 PE=2 SV=1;tr|A0A1L	27.0213	27.8341	27.7002	27.351	28.1747	27.3337	27.5023	27.421	27.4766	27.608	0.995244	0.637996
sp|P47857|PFKAM_MOUSE ATP-dependent 6-phosphofructokinase, muscle type OS=Mus musculus GN=Pfkm PE=1 SV=3;tr|Q99K08|Q99K08_MOUSE ATP-dependent 6-phosphofructokinase OS=Mus musculus GN=Pfkm PE=2 SV=1	27.3773	28.3819	27.6176	25.6261	26.1327	26.2291	28.0299	27.1666	27.2507	26.8896	1.01343	0.639941
sp|Q01853|TERA_MOUSE Transitional endoplasmic reticulum ATPase OS=Mus musculus GN=Vcp PE=1 SV=4;tr|Q8BNF8|Q8BNF8_MOUSE Uncharacterized protein OS=Mus musculus GN=Vcp PE=2 SV=1	27.8495	28.2032	27.9649	27.5037	27.0567	28.6944	28.301	28.2062	27.8803	28.0646	0.993434	0.645829
sp|P16125|LDHB_MOUSE L-lactate dehydrogenase B chain OS=Mus musculus GN=Ldhb PE=1 SV=2;tr|D3Z7F0|D3Z7F0_MOUSE L-lactate dehydrogenase (Fragment) OS=Mus musculus GN=Ldhb PE=1 SV=1	28.9273	28.6801	28.5086	28.023	28.1902	28.7962	29.3432	28.4172	28.5347	28.6867	0.994702	0.64779
sp|P99024|TBB5_MOUSE Tubulin beta-5 chain OS=Mus musculus GN=Tubb5 PE=1 SV=1	26.2868	25.795	26.286	24.5256	24.7832	25.9723	25.8094	25.3928	25.7234	25.4894	1.00918	0.651912
sp|Q921I1|TRFE_MOUSE Serotransferrin OS=Mus musculus GN=Tf PE=1 SV=1;tr|E9Q035|E9Q035_MOUSE Predicted gene 20425 OS=Mus musculus GN=Gm20425 PE=4 SV=1	36.0567	36.3075	36.3144	36.5688	36.7904	36.2888	36.1174	36.3854	36.3119	36.3955	0.997702	0.653292
tr|Q542X9|Q542X9_MOUSE Superoxide dismutase [Cu-Zn] OS=Mus musculus GN=Sod3 PE=1 SV=1;tr|O88592|O88592_MOUSE Superoxide dismutase [Cu-Zn] OS=Mus musculus GN=Sod3 PE=2 SV=1;sp|O09164|SODE_MOUSE Extracellular superoxide dismutase [Cu-Zn] OS=Mus musculus GN=S	27.3084	27.6037	27.3773	26.9487	27.3619	27.3951	26.8345	27.2922	27.3095	27.2209	1.00326	0.654631
tr|Q564E2|Q564E2_MOUSE L-lactate dehydrogenase OS=Mus musculus GN=Ldha PE=1 SV=1;sp|P06151|LDHA_MOUSE L-lactate dehydrogenase A chain OS=Mus musculus GN=Ldha PE=1 SV=3;tr|Q3TI99|Q3TI99_MOUSE L-lactate dehydrogenase OS=Mus musculus GN=Ldha PE=2 SV=1;tr|Q3TC	31.1718	31.0706	31.0539	30.201	30.6809	30.629	31.4994	31.2609	30.8743	31.0175	0.995382	0.662372
sp|Q9ESB3|HRG_MOUSE Histidine-rich glycoprotein OS=Mus musculus GN=Hrg PE=1 SV=2;tr|A0A0R4J039|A0A0R4J039_MOUSE Histidine-rich glycoprotein OS=Mus musculus GN=Hrg PE=1 SV=1	29.1643	29.084	29.4869	29.6213	29.517	29.3161	29.3163	29.4587	29.3391	29.402	0.997862	0.664595
tr|Q3UEM7|Q3UEM7_MOUSE Uncharacterized protein OS=Mus musculus GN=Fgg PE=1 SV=1;sp|Q8VCM7|FIBG_MOUSE Fibrinogen gamma chain OS=Mus musculus GN=Fgg PE=1 SV=1;tr|Q3UER8|Q3UER8_MOUSE Fibrinogen gamma chain OS=Mus musculus GN=Fgg PE=1 SV=1	28.6247	28.9967	28.825	29.1603	29.7778	28.627	28.6366	29.0866	28.9017	29.032	0.995511	0.673223
sp|P63028|TCTP_MOUSE Translationally-controlled tumor protein OS=Mus musculus GN=Tpt1 PE=1 SV=1;tr|D3YU75|D3YU75_MOUSE Translationally-controlled tumor protein OS=Mus musculus GN=Tpt1 PE=1 SV=1	26.7374	25.9882	26.5851	25.9772	25.5454	26.0425	26.4397	26.7061	26.3219	26.1834	1.00529	0.681334
sp|P23953|EST1C_MOUSE Carboxylesterase 1C OS=Mus musculus GN=Ces1c PE=1 SV=4	32.3166	32.3047	32.5292	32.7286	32.22	32.6569	32.6776	32.5739	32.4698	32.5321	0.998085	0.685187
sp|P68368|TBA4A_MOUSE Tubulin alpha-4A chain OS=Mus musculus GN=Tuba4a PE=1 SV=1;tr|A0A0A0MQA5|A0A0A0MQA5_MOUSE Tubulin alpha chain (Fragment) OS=Mus musculus GN=Tuba4a PE=1 SV=1	28.3231	28.1468	28.0596	26.9503	27.4676	28.6968	28.6059	27.484	27.8699	28.0636	0.993099	0.689025
tr|Q5SVY2|Q5SVY2_MOUSE Peptidyl-prolyl cis-trans isomerase OS=Mus musculus GN=Ppia PE=1 SV=1;tr|Q3UAJ1|Q3UAJ1_MOUSE Peptidyl-prolyl cis-trans isomerase OS=Mus musculus GN=Ppia PE=2 SV=1;tr|Q3TE63|Q3TE63_MOUSE Peptidyl-prolyl cis-trans isomerase OS=Mus musc	30.6023	29.6273	30.3233	29.6592	29.7712	29.8011	30.0569	30.1455	30.053	29.9437	1.00365	0.689315
tr|Q5NCI4|Q5NCI4_MOUSE Phosphoglycerate mutase OS=Mus musculus GN=Pgam2 PE=1 SV=1;sp|O70250|PGAM2_MOUSE Phosphoglycerate mutase 2 OS=Mus musculus GN=Pgam2 PE=1 SV=3	31.499	31.1904	31.8613	30.6296	30.6746	30.4915	31.6905	31.6517	31.2951	31.1271	1.0054	0.696202
sp|P06683|CO9_MOUSE Complement component C9 OS=Mus musculus GN=C9 PE=1 SV=2;tr|A0A0R4J032|A0A0R4J032_MOUSE Complement component 9 OS=Mus musculus GN=C9 PE=1 SV=1	24.647	24.9446	25.1086	25.86	25.2454	24.8242	25.4269	25.5589	25.1401	25.2639	0.995101	0.697876
tr|Q3UVB1|Q3UVB1_MOUSE Myoglobin OS=Mus musculus GN=Mb PE=1 SV=1;sp|P04247|MYG_MOUSE Myoglobin OS=Mus musculus GN=Mb PE=1 SV=3	33.9348	33.465	33.9659	32.9187	33.1488	32.6161	34.0016	33.8773	33.5711	33.4109	1.00479	0.707802
sp|P97467|AMD_MOUSE Peptidyl-glycine alpha-amidating monooxygenase OS=Mus musculus GN=Pam PE=1 SV=2;tr|F8VQA4|F8VQA4_MOUSE Peptidyl-glycine alpha-amidating monooxygenase OS=Mus musculus GN=Pam PE=1 SV=1;tr|E9Q704|E9Q704_MOUSE Peptidyl-glycine alpha-amidati	26.9503	27.7224	27.1894	27.5174	27.7036	27.2999	27.3514	27.3287	27.3449	27.4209	0.997228	0.711235
tr|Q4VAI2|Q4VAI2_MOUSE Acid phosphatase 1, soluble OS=Mus musculus GN=Acp1 PE=2 SV=1;sp|Q9D358|PPAC_MOUSE Low molecular weight phosphotyrosine protein phosphatase OS=Mus musculus GN=Acp1 PE=1 SV=3;tr|A0A1W2P7X3|A0A1W2P7X3_MOUSE Low molecular weight phospho	25.7217	25.4531	25.9876	25.5981	25.0524	26.3657	25.7874	26.0207	25.6901	25.8065	0.995489	0.71159
sp|P22005|PENK_MOUSE Proenkephalin-A OS=Mus musculus GN=Penk PE=1 SV=2;tr|Q3UXY8|Q3UXY8_MOUSE Uncharacterized protein (Fragment) OS=Mus musculus GN=Penk PE=2 SV=1;tr|B1AZQ0|B1AZQ0_MOUSE Proenkephalin-A (Fragment) OS=Mus musculus GN=Penk PE=1 SV=1	29.4497	29.8153	29.7446	29.5875	29.8254	29.3261	29.5482	29.6983	29.6493	29.5995	1.00168	0.724691
sp|P0DP28|CALM3_MOUSE Calmodulin-3 OS=Mus musculus GN=Calm3 PE=1 SV=1;sp|P0DP27|CALM2_MOUSE Calmodulin-2 OS=Mus musculus GN=Calm2 PE=1 SV=1;sp|P0DP26|CALM1_MOUSE Calmodulin-1 OS=Mus musculus GN=Calm1 PE=1 SV=1;tr|Q3UKW2|Q3UKW2_MOUSE Calmodulin-1 OS=Mus mus	29.9606	29.404	29.5262	28.9671	29.2938	29.6434	29.85	29.4169	29.4645	29.551	0.997071	0.729191
tr|Q9QZ83|Q9QZ83_MOUSE Gamma actin-like protein OS=Mus musculus GN=Actg1 PE=2 SV=1	30.9176	29.5859	30.6411	29.7042	29.7556	30.1517	30.163	30.2746	30.2122	30.0862	1.00419	0.732725
tr|A8DUP7|A8DUP7_MOUSE Beta-globin OS=Mus musculus GN=Hbbt1 PE=3 SV=1;tr|D0U270|D0U270_MUSMC Beta-globin OS=Mus musculus castaneus GN=Hbbt1 PE=3 SV=1;tr|D0U269|D0U269_MUSMC Beta-globin OS=Mus musculus castaneus GN=Hbbt1 PE=3 SV=1;tr|A8DUK0|A8DUK0_MOUSE Bet	30.8972	30.6605	30.7143	30.8815	30.0304	31.2783	30.7807	31.5397	30.7884	30.9073	0.996154	0.736536
tr|Q548W7|Q548W7_MOUSE Diazepam binding inhibitor OS=Mus musculus GN=Dbi PE=1 SV=1;tr|Q3ULV8|Q3ULV8_MOUSE Uncharacterized protein OS=Mus musculus GN=Dbi PE=2 SV=1;sp|P31786|ACBP_MOUSE Acyl-CoA-binding protein OS=Mus musculus GN=Dbi PE=1 SV=2;tr|M0QWU8|M0QW	28.3843	27.9769	28.3796	27.6253	27.9706	28.0722	28.3617	28.2434	28.0915	28.162	0.997499	0.739493
tr|Q58E61|Q58E61_MOUSE Igh protein OS=Mus musculus GN=Igh PE=2 SV=1;tr|Q4VAB6|Q4VAB6_MOUSE Igh protein OS=Mus musculus GN=Igh PE=2 SV=1	25.8946	26.4345	27.242	27.8272	26.5139	27.4086	27.2674	26.8649	26.8496	27.0137	0.993925	0.740518
tr|Q545F0|Q545F0_MOUSE MCG3124, isoform CRA_b OS=Mus musculus GN=Mif PE=1 SV=1;sp|P34884|MIF_MOUSE Macrophage migration inhibitory factor OS=Mus musculus GN=Mif PE=1 SV=2	27.609	27.1686	27.9036	26.6769	26.9404	27.6035	27.7691	27.4673	27.3396	27.4451	0.996155	0.754257
tr|Q571D4|Q571D4_MOUSE MKIAA0387 protein (Fragment) OS=Mus musculus GN=Ptprn2 PE=2 SV=1;tr|Q3UU93|Q3UU93_MOUSE Receptor-type tyrosine-protein phosphatase N2 OS=Mus musculus GN=Ptprn2 PE=1 SV=1;tr|A3KN68|A3KN68_MOUSE Protein tyrosine phosphatase, receptor t	27.0691	27.7514	27.2644	27.1233	27.7774	26.8159	27.0137	27.2794	27.302	27.2216	1.00295	0.767359
sp|Q9CRB6|TPPP3_MOUSE Tubulin polymerization-promoting protein family member 3 OS=Mus musculus GN=Tppp3 PE=1 SV=1;tr|Q1JPR8|Q1JPR8_MOUSE Tppp3 protein (Fragment) OS=Mus musculus GN=Tppp3 PE=2 SV=1	27.2324	26.5825	27.0026	25.8073	26.2287	26.3875	27.2872	27.2384	26.6562	26.7854	0.995175	0.767992
sp|Q61171|PRDX2_MOUSE Peroxiredoxin-2 OS=Mus musculus GN=Prdx2 PE=1 SV=3;tr|D3Z4A4|D3Z4A4_MOUSE Peroxiredoxin-2 (Fragment) OS=Mus musculus GN=Prdx2 PE=1 SV=8;tr|Q5M9N9|Q5M9N9_MOUSE Prdx2 protein OS=Mus musculus GN=Prdx2 PE=2 SV=1	30.7964	30.8472	30.7248	30.5403	29.9487	31.7246	30.5773	31.132	30.7272	30.8456	0.996159	0.769087
sp|Q9WUB3|PYGM_MOUSE Glycogen phosphorylase, muscle form OS=Mus musculus GN=Pygm PE=1 SV=3;tr|E9PUM3|E9PUM3_MOUSE Alpha-1,4 glucan phosphorylase OS=Mus musculus GN=Pygm PE=1 SV=1	31.5899	31.9696	31.8517	30.5837	30.8168	30.95	32.2253	31.4771	31.4987	31.3673	1.00419	0.779484
tr|Q0VGU4|Q0VGU4_MOUSE MCG18019 OS=Mus musculus GN=Vgf PE=1 SV=1	30.2719	30.535	30.5445	30.3809	30.7716	30.2731	30.3703	30.4651	30.4331	30.47	0.998788	0.779695
tr|Q53ZT3|Q53ZT3_MOUSE Amyloid-beta protein-like protein long isoform OS=Mus musculus GN=App PE=2 SV=1;sp|P12023|A4_MOUSE Amyloid-beta A4 protein OS=Mus musculus GN=App PE=1 SV=3;tr|Q3TWF3|Q3TWF3_MOUSE Uncharacterized protein OS=Mus musculus GN=App PE=2 SV	30.6355	31.3773	31.2008	30.9392	31.693	30.9508	30.7461	31.0598	31.0382	31.1124	0.997614	0.785176
sp|P00920|CAH2_MOUSE Carbonic anhydrase 2 OS=Mus musculus GN=Ca2 PE=1 SV=4	31.7039	31.2205	31.6735	31.826	30.8302	32.4543	31.4074	32.177	31.606	31.7172	0.996493	0.786397
tr|Q5U415|Q5U415_MOUSE Aldo-keto reductase family 1, member B3 (Aldose reductase) OS=Mus musculus GN=Akr1b3 PE=2 SV=1;tr|Q3UDY1|Q3UDY1_MOUSE MCG6067, isoform CRA_b OS=Mus musculus GN=Akr1b3 PE=1 SV=1;sp|P45376|ALDR_MOUSE Aldose reductase OS=Mus musculus GN	29.5783	29.0153	29.5259	28.9295	29.1311	28.7709	29.4251	29.4591	29.2622	29.1965	1.00225	0.786874
tr|G3X9I1|G3X9I1_MOUSE DNA segment, Chr 6, Wayne State University 176, expressed, isoform CRA_a OS=Mus musculus GN=Fam3c PE=1 SV=1;sp|Q91VU0|FAM3C_MOUSE Protein FAM3C OS=Mus musculus GN=Fam3c PE=1 SV=1;tr|G5E911|G5E911_MOUSE DNA segment, Chr 6, Wayne State	25.9365	26.1727	26.147	26.0428	26.1408	26.186	25.7683	26.3547	26.0747	26.1124	0.998556	0.789207
tr|Q3TF08|Q3TF08_MOUSE Uncharacterized protein (Fragment) OS=Mus musculus GN=Rbp4 PE=2 SV=1;sp|Q00724|RET4_MOUSE Retinol-binding protein 4 OS=Mus musculus GN=Rbp4 PE=1 SV=2;tr|H7BWY6|H7BWY6_MOUSE Retinol-binding protein 4 OS=Mus musculus GN=Rbp4 PE=1 SV=1	28.5178	28.886	29.2207	29.6391	29.6144	28.7734	28.9058	29.3046	29.0659	29.1495	0.99713	0.79399
sp|P09535|IGF2_MOUSE Insulin-like growth factor II OS=Mus musculus GN=Igf2 PE=1 SV=1;tr|D3Z4N4|D3Z4N4_MOUSE Insulin-like growth factor II (Fragment) OS=Mus musculus GN=Igf2 PE=1 SV=2	27.5697	28.5763	28.2043	28.2082	28.75	27.9701	27.5934	27.8988	28.1396	28.0531	1.00309	0.797672
tr|A2RTA0|A2RTA0_MOUSE Creatine kinase, muscle OS=Mus musculus GN=Ckm PE=1 SV=1;sp|P07310|KCRM_MOUSE Creatine kinase M-type OS=Mus musculus GN=Ckm PE=1 SV=1;tr|Q9D6U7|Q9D6U7_MOUSE Uncharacterized protein OS=Mus musculus GN=Ckm PE=2 SV=1	34.6671	34.4601	34.9015	33.6827	33.8353	34.0539	34.7621	34.6924	34.4279	34.3359	1.00268	0.802052
tr|Q8C6E3|Q8C6E3_MOUSE Catalase OS=Mus musculus GN=Cat PE=2 SV=1;sp|P24270|CATA_MOUSE Catalase OS=Mus musculus GN=Cat PE=1 SV=4;tr|Q3UZE7|Q3UZE7_MOUSE Catalase OS=Mus musculus GN=Cat PE=2 SV=1;tr|Q3UF58|Q3UF58_MOUSE Catalase OS=Mus musculus GN=Cat PE=2 SV=	27.7915	28.2776	28.2452	28.0362	26.5439	29.3656	28.1859	28.9037	28.0876	28.2498	0.994259	0.804958
tr|Q543J5|Q543J5_MOUSE Antithrombin OS=Mus musculus GN=Serpinc1 PE=1 SV=1;sp|P32261|ANT3_MOUSE Antithrombin-III OS=Mus musculus GN=Serpinc1 PE=1 SV=1;tr|A0A0A6YWH7|A0A0A6YWH7_MOUSE Antithrombin-III (Fragment) OS=Mus musculus GN=Serpinc1 PE=1 SV=1	30.8687	30.8472	31.2252	31.5504	31.1648	31.2025	31.0112	31.2912	31.1229	31.1674	0.998572	0.809496
tr|D3Z396|D3Z396_MOUSE Neurotrimin OS=Mus musculus GN=Ntm PE=1 SV=1;tr|Q8BG33|Q8BG33_MOUSE Neurotrimin OS=Mus musculus GN=Ntm PE=1 SV=1;tr|Q3TYC2|Q3TYC2_MOUSE Uncharacterized protein OS=Mus musculus GN=Ntm PE=2 SV=1;sp|Q99PJ0|NTRI_MOUSE Neurotrimin OS=Mus	27.9068	28.1415	28.0215	28.3267	28.4845	28.2924	27.695	28.1143	28.0991	28.1466	0.998314	0.811967
tr|Q7M754|Q7M754_MOUSE Try10-like trypsinogen OS=Mus musculus GN=Gm5409 PE=2 SV=1;tr|Q792Z1|Q792Z1_MOUSE MCG140784 OS=Mus musculus GN=Try10 PE=1 SV=1	28.9389	29.2877	29.2015	29.4126	29.5836	29.1231	28.6474	29.2708	29.2102	29.1562	1.00185	0.813748
sp|P97447|FHL1_MOUSE Four and a half LIM domains protein 1 OS=Mus musculus GN=Fhl1 PE=1 SV=3;tr|A2AEX8|A2AEX8_MOUSE Four and a half LIM domains 1, isoform CRA_b OS=Mus musculus GN=Fhl1 PE=1 SV=1;tr|A2AEX6|A2AEX6_MOUSE Four and a half LIM domains protein 1	30.0997	30.2229	30.1147	28.9081	28.8174	29.0619	31.1693	29.7088	29.8363	29.6894	1.00495	0.818342
tr|Q5FW97|Q5FW97_MOUSE Enolase 1, alpha non-neuron OS=Mus musculus GN=EG433182 PE=1 SV=1;sp|P17182|ENOA_MOUSE Alpha-enolase OS=Mus musculus GN=Eno1 PE=1 SV=3;tr|Q6PHC1|Q6PHC1_MOUSE Alpha-enolase OS=Mus musculus GN=Eno1 PE=1 SV=1	30.1667	29.88	30.0034	29.546	29.7178	29.7208	30.1736	29.8241	29.8991	29.8591	1.00134	0.821868
tr|Q80Y52|Q80Y52_MOUSE Heat shock protein 90, alpha (Cytosolic), class A member 1 OS=Mus musculus GN=Hsp90aa1 PE=1 SV=2;tr|Q3UIF3|Q3UIF3_MOUSE Uncharacterized protein OS=Mus musculus GN=Hsp90aa1 PE=2 SV=1;tr|Q3TKA2|Q3TKA2_MOUSE Uncharacterized protein OS=M	26.1196	25.9526	25.6567	24.6791	25.0166	26.4185	26.0358	25.3522	25.602	25.7058	0.995964	0.826466
sp|O09114|PTGDS_MOUSE Prostaglandin-H2 D-isomerase OS=Mus musculus GN=Ptgds PE=1 SV=1	34.2628	34.5584	34.542	34.5213	34.9834	34.3776	34.3124	34.3626	34.4711	34.509	0.998903	0.834378
tr|A3KML3|A3KML3_MOUSE MCG126220 OS=Mus musculus GN=Ywhaq PE=2 SV=1;sp|P68254|1433T_MOUSE 14-3-3 protein theta OS=Mus musculus GN=Ywhaq PE=1 SV=1;tr|F6YY69|F6YY69_MOUSE 14-3-3 protein theta (Fragment) OS=Mus musculus GN=Ywhaq PE=1 SV=1;tr|F6VW30|F6VW30_MOU	25.9247	25.4302	25.3088	24.9751	24.8803	25.6855	25.6125	25.2326	25.4097	25.3527	1.00225	0.840433
tr|Q8K016|Q8K016_MOUSE Inter-alpha trypsin inhibitor, heavy chain 2 OS=Mus musculus GN=Itih2 PE=2 SV=1;sp|Q61703|ITIH2_MOUSE Inter-alpha-trypsin inhibitor heavy chain H2 OS=Mus musculus GN=Itih2 PE=1 SV=1;tr|G3X977|G3X977_MOUSE Inter-alpha trypsin inhibito	28.5051	28.8669	28.6903	28.5776	28.4524	28.9181	28.6314	28.5355	28.66	28.6343	1.0009	0.84832
sp|Q01339|APOH_MOUSE Beta-2-glycoprotein 1 OS=Mus musculus GN=Apoh PE=1 SV=1;tr|Q6LAL7|Q6LAL7_MOUSE Beta-2 glycoprotein I (Fragment) OS=Mus musculus PE=4 SV=1;tr|Q9CY42|Q9CY42_MOUSE Uncharacterized protein OS=Mus musculus GN=Apoh PE=2 SV=1	29.1166	29.8372	30.2173	30.3327	30.3275	29.7373	29.6407	30.0503	29.8759	29.9389	0.997896	0.848441
tr|Q3UHW9|Q3UHW9_MOUSE Uncharacterized protein OS=Mus musculus GN=Cfl2 PE=1 SV=1;sp|P45591|COF2_MOUSE Cofilin-2 OS=Mus musculus GN=Cfl2 PE=1 SV=1;tr|A0A1Y7VJ71|A0A1Y7VJ71_MOUSE Cofilin-2 OS=Mus musculus GN=Cfl2 PE=1 SV=1	28.1043	27.6067	28.2355	27.3721	26.4476	27.7138	28.5501	28.2161	27.8297	27.7319	1.00352	0.852726
tr|Q5RJV4|Q5RJV4_MOUSE Phosphoglucomutase 2 OS=Mus musculus GN=Pgm2 PE=2 SV=1;sp|Q9D0F9|PGM1_MOUSE Phosphoglucomutase-1 OS=Mus musculus GN=Pgm1 PE=1 SV=4;tr|Q7TNU0|Q7TNU0_MOUSE Pgm2 protein (Fragment) OS=Mus musculus GN=Pgm2 PE=2 SV=1;tr|Q66JR7|Q66JR7_MOUS	30.1223	29.7105	30.3853	29.1166	29.4362	29.6015	30.2457	30.3121	29.8337	29.8989	0.997818	0.860167
tr|Q6ZWX2|Q6ZWX2_MOUSE Thymosin, beta 4, X chromosome OS=Mus musculus GN=Tmsb4x PE=2 SV=1;sp|P20065|TYB4_MOUSE Thymosin beta-4 OS=Mus musculus GN=Tmsb4x PE=1 SV=1	29.5508	29.0117	29.5004	28.9234	29.3023	29.2062	29.3304	29.0197	29.2466	29.2147	1.00109	0.862731
tr|I6L985|I6L985_MOUSE Igh protein OS=Mus musculus GN=Igh PE=1 SV=1;tr|A0A075B5P4|A0A075B5P4_MOUSE Ig gamma-1 chain C region secreted form (Fragment) OS=Mus musculus GN=Ighg1 PE=1 SV=1;tr|A0A0A6YWR2|A0A0A6YWR2_MOUSE Ig gamma-1 chain C region secreted form	28.6501	28.8594	29.3665	30.4528	29.6564	29.5414	28.7794	29.0315	29.3322	29.2522	1.00273	0.865722
sp|P68372|TBB4B_MOUSE Tubulin beta-4B chain OS=Mus musculus GN=Tubb4b PE=1 SV=1;tr|Q9CVR0|Q9CVR0_MOUSE Tubulin beta chain (Fragment) OS=Mus musculus GN=Tubb4b PE=2 SV=2;tr|Q9DCR1|Q9DCR1_MOUSE Uncharacterized protein (Fragment) OS=Mus musculus GN=Tubb4b PE=	28.7605	28.4635	28.4015	27.0223	27.7697	28.5334	28.8082	27.8406	28.162	28.238	0.997309	0.875586
tr|Q3TY66|Q3TY66_MOUSE Chromogranin B OS=Mus musculus GN=Chgb PE=1 SV=1;sp|P16014|SCG1_MOUSE Secretogranin-1 OS=Mus musculus GN=Chgb PE=1 SV=2;tr|Q8BP91|Q8BP91_MOUSE Uncharacterized protein OS=Mus musculus GN=Chgb PE=2 SV=1;tr|Q3UZU8|Q3UZU8_MOUSE Uncharact	31.6447	32.3231	31.8719	31.988	32.474	31.7447	31.7856	31.9602	31.9569	31.9911	0.998931	0.881168
tr|Z4YN57|Z4YN57_MOUSE Phosphoinositide-3-kinase-interacting protein 1 (Fragment) OS=Mus musculus GN=Pik3ip1 PE=1 SV=1;sp|Q7TMJ8|P3IP1_MOUSE Phosphoinositide-3-kinase-interacting protein 1 OS=Mus musculus GN=Pik3ip1 PE=2 SV=1;tr|F6S185|F6S185_MOUSE Phospho	26.4472	27.3453	26.6088	26.8037	27.5339	26.5748	26.7145	26.5669	26.8012	26.8475	0.998275	0.883461
sp|P13634|CAH1_MOUSE Carbonic anhydrase 1 OS=Mus musculus GN=Ca1 PE=1 SV=4	30.5943	30.2529	30.6498	30.7028	29.9434	31.2192	30.1295	31.1148	30.55	30.6017	0.998309	0.885502
tr|A0A075B5P3|A0A075B5P3_MOUSE Immunoglobulin heavy constant gamma 2B (Fragment) OS=Mus musculus GN=Ighg2b PE=1 SV=1;tr|A0A0A6YVP0|A0A0A6YVP0_MOUSE Immunoglobulin heavy constant gamma 2B (Fragment) OS=Mus musculus GN=Ighg2b PE=1 SV=2;tr|A0A0F7R1P3|A0A0F7R1	31.6077	31.5627	31.0185	31.6353	31.2111	31.2301	31.8437	31.4187	31.4561	31.4259	1.00096	0.889214
tr|Q71LX8|Q71LX8_MOUSE Heat shock protein 84b OS=Mus musculus GN=Hsp90ab1 PE=1 SV=1;sp|P11499|HS90B_MOUSE Heat shock protein HSP 90-beta OS=Mus musculus GN=Hsp90ab1 PE=1 SV=3	28.5376	28.644	28.4223	25.9587	27.8567	28.1449	28.5569	27.3889	27.8906	27.9868	0.996562	0.893777
sp|Q8BND5|QSOX1_MOUSE Sulfhydryl oxidase 1 OS=Mus musculus GN=Qsox1 PE=1 SV=1	27.7648	28.0128	27.8227	27.84	28.0219	27.8162	27.8782	27.7661	27.8601	27.8706	0.999623	0.895938
tr|Q4FK86|Q4FK86_MOUSE Peptidoglycan-recognition protein OS=Mus musculus GN=Pglyrp1 PE=1 SV=1;sp|O88593|PGRP1_MOUSE Peptidoglycan recognition protein 1 OS=Mus musculus GN=Pglyrp1 PE=1 SV=1	25.585	25.4419	25.9999	26.5569	26.0397	25.4605	25.8282	26.1218	25.8959	25.8626	1.00129	0.912306
tr|B8JJN0|B8JJN0_MOUSE Predicted gene 20547 OS=Mus musculus GN=Gm20547 PE=3 SV=1;tr|F6VQX8|F6VQX8_MOUSE Predicted gene 20547 (Fragment) OS=Mus musculus GN=Gm20547 PE=3 SV=1;tr|Q3UEG8|Q3UEG8_MOUSE Complement factor B, isoform CRA_a OS=Mus musculus GN=Cfb PE	29.529	29.3009	29.6006	30.0967	29.8161	29.5446	29.3554	29.8989	29.6318	29.6537	0.99926	0.91988
tr|Q5M9K1|Q5M9K1_MOUSE Transthyretin OS=Mus musculus GN=Ttr PE=1 SV=1;sp|P07309|TTHY_MOUSE Transthyretin OS=Mus musculus GN=Ttr PE=1 SV=1;tr|Q9D6A4|Q9D6A4_MOUSE Transthyretin OS=Mus musculus GN=Ttr PE=2 SV=1	33.1281	33.4039	33.3907	33.7171	33.8581	33.0642	33.2206	33.5773	33.41	33.4301	0.999399	0.928726
sp|P14152|MDHC_MOUSE Malate dehydrogenase, cytoplasmic OS=Mus musculus GN=Mdh1 PE=1 SV=3	31.4514	31.0732	31.1827	30.2868	30.5784	30.6834	31.6771	31.1723	30.9985	31.0278	0.999057	0.937024
tr|Q3U7Z6|Q3U7Z6_MOUSE Phosphoglycerate mutase OS=Mus musculus GN=Pgam1 PE=1 SV=1;sp|Q9DBJ1|PGAM1_MOUSE Phosphoglycerate mutase 1 OS=Mus musculus GN=Pgam1 PE=1 SV=3;tr|Q6NWV5|Q6NWV5_MOUSE Pgam1 protein (Fragment) OS=Mus musculus GN=Pgam1 PE=2 SV=1	27.2194	26.7461	26.8179	26.5546	26.5459	26.9956	27.2504	26.6155	26.8345	26.8519	0.999353	0.938681
sp|Q99M71|EPDR1_MOUSE Mammalian ependymin-related protein 1 OS=Mus musculus GN=Epdr1 PE=1 SV=1	26.4693	26.8848	26.6835	26.6115	27.1154	26.5352	26.2324	26.7027	26.6623	26.6464	1.0006	0.940264
sp|Q9EPL2|CSTN1_MOUSE Calsyntenin-1 OS=Mus musculus GN=Clstn1 PE=1 SV=1	26.8169	27.852	27.3293	27.6727	28.2023	27.2385	26.899	27.2294	27.4177	27.3923	1.00093	0.946276
tr|Q544Y8|Q544Y8_MOUSE Granulin OS=Mus musculus GN=Grn PE=2 SV=1;tr|Q3UC19|Q3UC19_MOUSE Uncharacterized protein OS=Mus musculus GN=Grn PE=2 SV=1;tr|Q3TX66|Q3TX66_MOUSE Uncharacterized protein OS=Mus musculus GN=Grn PE=2 SV=1;tr|Q3TWT4|Q3TWT4_MOUSE Uncharac	26.145	26.0135	25.5683	25.6517	26.4849	25.6547	25.659	25.6474	25.8446	25.8615	0.999348	0.94841
tr|E0CXN5|E0CXN5_MOUSE Glycerol-3-phosphate dehydrogenase [NAD(+)] OS=Mus musculus GN=Gpd1 PE=1 SV=1;sp|P13707|GPDA_MOUSE Glycerol-3-phosphate dehydrogenase [NAD(+)], cytoplasmic OS=Mus musculus GN=Gpd1 PE=1 SV=3	28.0499	27.3497	27.9572	25.7556	26.6621	26.6317	27.7548	27.9295	27.2781	27.2445	1.00123	0.959513
sp|P06909|CFAH_MOUSE Complement factor H OS=Mus musculus GN=Cfh PE=1 SV=2;tr|E9Q8I0|E9Q8I0_MOUSE Complement factor H OS=Mus musculus GN=Cfh PE=1 SV=1;tr|D6RGQ0|D6RGQ0_MOUSE Complement factor H OS=Mus musculus GN=Cfh PE=1 SV=1;tr|E9Q8H9|E9Q8H9_MOUSE Complem	30.9696	31.3838	31.2556	31.5103	31.6251	31.3066	31.0452	31.1776	31.2798	31.2886	0.999719	0.960314
tr|Q8CB17|Q8CB17_MOUSE Uncharacterized protein OS=Mus musculus GN=Fetub PE=2 SV=1;sp|Q9QXC1|FETUB_MOUSE Fetuin-B OS=Mus musculus GN=Fetub PE=1 SV=1;tr|Q6YJU2|Q6YJU2_MOUSE GUGU alpha OS=Mus musculus GN=Fetub PE=2 SV=1;tr|Q6YJU1|Q6YJU1_MOUSE Fetuin-B OS=Mus	28.5121	28.5886	29.3211	29.4904	29.2807	28.9386	28.9399	28.8009	28.978	28.99	0.999587	0.966053
sp|P51910|APOD_MOUSE Apolipoprotein D OS=Mus musculus GN=Apod PE=1 SV=1	30.1855	31.4108	30.2704	30.5769	31.1273	30.2692	30.4606	30.529	30.6109	30.5965	1.00047	0.967157
tr|B7ZNS9|B7ZNS9_MOUSE Cfd protein OS=Mus musculus GN=Cfd PE=2 SV=1;tr|Q3UP47|Q3UP47_MOUSE Complement factor D (Adipsin) OS=Mus musculus GN=Cfd PE=2 SV=1;sp|P03953|CFAD_MOUSE Complement factor D OS=Mus musculus GN=Cfd PE=1 SV=1	28.1814	27.3135	28.6678	28.6445	28.0834	28.5817	28.2957	27.9057	28.2018	28.2166	0.999475	0.967454
sp|P11352|GPX1_MOUSE Glutathione peroxidase 1 OS=Mus musculus GN=Gpx1 PE=1 SV=2;tr|A0A0A6YVV2|A0A0A6YVV2_MOUSE Glutathione peroxidase OS=Mus musculus GN=Gpx1 PE=1 SV=1;tr|A0A0A6YY34|A0A0A6YY34_MOUSE Glutathione peroxidase OS=Mus musculus GN=Gpx1 PE=1 SV=1	27.6442	28.0055	27.7578	27.396	26.8635	28.4291	27.3981	28.1758	27.7009	27.7166	0.999432	0.968356
tr|Q6GT24|Q6GT24_MOUSE Peroxiredoxin-6 OS=Mus musculus GN=Prdx6 PE=1 SV=1;tr|Q53ZU7|Q53ZU7_MOUSE Peroxiredoxin 6 OS=Mus musculus GN=Prdx6 PE=2 SV=1;sp|O08709|PRDX6_MOUSE Peroxiredoxin-6 OS=Mus musculus GN=Prdx6 PE=1 SV=3;tr|Q6A0D0|Q6A0D0_MOUSE MKIAA0106 pr	28.5019	28.2402	28.4299	28.1045	27.7136	28.6181	28.5088	28.472	28.3191	28.3281	0.999682	0.969502
sp|Q99LX0|PARK7_MOUSE Protein/nucleic acid deglycase DJ-1 OS=Mus musculus GN=Park7 PE=1 SV=1;tr|A2A813|A2A813_MOUSE Protein/nucleic acid deglycase DJ-1 OS=Mus musculus GN=Park7 PE=1 SV=1;tr|A2A815|A2A815_MOUSE Protein/nucleic acid deglycase DJ-1 (Fragment)	28.6213	28.1437	29.0472	27.6392	27.8765	28.4931	28.3559	28.6814	28.3628	28.3518	1.00039	0.975731
tr|A0A1L1SUX8|A0A1L1SUX8_MOUSE Thy-1 membrane glycoprotein (Fragment) OS=Mus musculus GN=Thy1 PE=1 SV=1;tr|Q53YX2|Q53YX2_MOUSE CD90.1 OS=Mus musculus GN=Thy1 PE=2 SV=1;sp|P01831|THY1_MOUSE Thy-1 membrane glycoprotein OS=Mus musculus GN=Thy1 PE=1 SV=1	28.7479	29.1857	29.263	29.1522	29.2243	28.9239	29.1062	29.1098	29.0872	29.091	0.999869	0.97768
tr|Q547B5|Q547B5_MOUSE Osteopontin OS=Mus musculus GN=Spp1 PE=1 SV=1;sp|P10923|OSTP_MOUSE Osteopontin OS=Mus musculus GN=Spp1 PE=1 SV=1;tr|F8WIP8|F8WIP8_MOUSE Osteopontin OS=Mus musculus GN=Spp1 PE=1 SV=1;tr|Q3UZY3|Q3UZY3_MOUSE Uncharacterized protein OS=M	28.8628	30.1207	29.1364	29.7538	30.0089	28.8473	29.138	29.8336	29.4684	29.457	1.00039	0.977989
tr|Q3TYD5|Q3TYD5_MOUSE Uncharacterized protein OS=Mus musculus GN=Sparcl1 PE=2 SV=1;sp|P70663|SPRL1_MOUSE SPARC-like protein 1 OS=Mus musculus GN=Sparcl1 PE=1 SV=3;tr|Q3UYK7|Q3UYK7_MOUSE Uncharacterized protein OS=Mus musculus GN=Sparcl1 PE=2 SV=1	31.8916	32.6968	32.2672	32.3097	32.9629	32.3121	31.8374	32.0854	32.2914	32.2995	0.999749	0.978784
tr|A8IP69|A8IP69_MOUSE 14-3-3 protein gamma subtype OS=Mus musculus GN=Ywhag PE=1 SV=1;sp|P61982|1433G_MOUSE 14-3-3 protein gamma OS=Mus musculus GN=Ywhag PE=1 SV=2	29.6032	29.098	29.288	28.446	28.3603	29.3511	29.6289	29.1332	29.1088	29.1183	0.999673	0.980064
sp|P47867|SCG3_MOUSE Secretogranin-3 OS=Mus musculus GN=Scg3 PE=1 SV=1	29.9963	30.727	30.4445	30.3049	31.0688	30.1106	30.086	30.2203	30.3682	30.3714	0.999893	0.991119
sp|Q60590|A1AG1_MOUSE Alpha-1-acid glycoprotein 1 OS=Mus musculus GN=Orm1 PE=1 SV=1;tr|Q91X23|Q91X23_MOUSE Alpha-1-acid glycoprotein OS=Mus musculus GN=Orm1 PE=2 SV=1;tr|Q61613|Q61613_MOUSE Alpha-1-acid glycoprotein (AGP) (Fragment) OS=Mus musculus GN=Orm1	30.1777	28.4139	29.4315	29.6987	29.1617	29.6656	29.3319	29.545	29.4305	29.426	1.00015	0.991278
sp|Q03517|SCG2_MOUSE Secretogranin-2 OS=Mus musculus GN=Scg2 PE=1 SV=1;tr|Q4W8U9|Q4W8U9_MOUSE Scg2 protein OS=Mus musculus GN=Scg2 PE=1 SV=1	29.5134	30.3162	29.8377	29.7791	30.1427	29.589	29.7181	29.9877	29.8616	29.8594	1.00008	0.991728
