# Supplementary material for: Decorin is an early CSF biomarker of Alzheimer’s Aβ amyloidosis
Source: Research Square preprint supplement (doi:10.21203/rs.3.rs-275229/v1), 2021-03-02
Supplement: Supplementary file 5 [file e536fa7daaeddeeb2747b7cc.xlsx]

## Sheet: All identified proteins
Supplementary Table 1: The list of all identified proteins from lable-free MS of mouse CSF
Protein IDs	Majority protein IDs	Fasta headers	LFQ intensity (Appwt/wt 1)	LFQ intensity (Appwt/wt 2)	LFQ intensity (Appwt/wt 3)	LFQ intensity (Appwt/wt 4)	LFQ intensity (AppNL-F/NL-F 1)	LFQ intensity (AppNL-F/NL-F 2)	LFQ intensity (AppNL-F/NL-F 3)	LFQ intensity (AppNL-F/NL-F 4)	LFQ intensity (AppNL-G-F/NL-G-F 1)	LFQ intensity (AppNL-G-F/NL-G-F 2)	LFQ intensity (AppNL-G-F/NL-G-F 3)	LFQ intensity (AppNL-G-F/NL-G-F 4)
sp|A2AUC9|KLH41_MOUSE;tr|Q3V184|Q3V184_MOUSE	sp|A2AUC9|KLH41_MOUSE;tr|Q3V184|Q3V184_MOUSE	sp|A2AUC9|KLH41_MOUSE Kelch-like protein 41 OS=Mus musculus GN=Klhl41 PE=1 SV=1;tr|Q3V184|Q3V184_MOUSE Uncharacterized protein (Fragment) OS=Mus musculus GN=Klhl41 PE=2 SV=1											12098000
sp|B0V2N1|PTPRS_MOUSE;tr|Q3TQ52|Q3TQ52_MOUSE	sp|B0V2N1|PTPRS_MOUSE;tr|Q3TQ52|Q3TQ52_MOUSE	sp|B0V2N1|PTPRS_MOUSE Receptor-type tyrosine-protein phosphatase S OS=Mus musculus GN=Ptprs PE=1 SV=1;tr|Q3TQ52|Q3TQ52_MOUSE Uncharacterized protein (Fragment) OS=Mus musculus GN=Ptprs PE=2 SV=1		13136000
sp|B2RXS4|PLXB2_MOUSE;tr|Q8K2J5|Q8K2J5_MOUSE;tr|Q8CHG6|Q8CHG6_MOUSE	sp|B2RXS4|PLXB2_MOUSE;tr|Q8K2J5|Q8K2J5_MOUSE	sp|B2RXS4|PLXB2_MOUSE Plexin-B2 OS=Mus musculus GN=Plxnb2 PE=1 SV=1;tr|Q8K2J5|Q8K2J5_MOUSE Plexin B2 OS=Mus musculus GN=Plxnb2 PE=2 SV=1				34324000
sp|B5X0G2|MUP17_MOUSE;tr|A2CEK6|A2CEK6_MOUSE;tr|L7N222|L7N222_MOUSE;tr|B0V388|B0V388_MOUSE	sp|B5X0G2|MUP17_MOUSE;tr|A2CEK6|A2CEK6_MOUSE;tr|L7N222|L7N222_MOUSE;tr|B0V388|B0V388_MOUSE	sp|B5X0G2|MUP17_MOUSE Major urinary protein 17 OS=Mus musculus GN=Mup17 PE=2 SV=2;tr|A2CEK6|A2CEK6_MOUSE Major urinary protein 11 OS=Mus musculus GN=Mup13 PE=3 SV=1;tr|L7N222|L7N222_MOUSE Major urinary protein 13 OS=Mus musculus GN=Mup13 PE=3 SV=1;tr|B0V38	297960000	908280000	492010000	655460000	187250000	122530000	667810000	1023000000	981540000	718380000	669980000	714190000
sp|B9EKI3|TMF1_MOUSE	sp|B9EKI3|TMF1_MOUSE	sp|B9EKI3|TMF1_MOUSE TATA element modulatory factor OS=Mus musculus GN=Tmf1 PE=1 SV=2			41900000
sp|E9PV24|FIBA_MOUSE;tr|Q08284|Q08284_MOUSE	sp|E9PV24|FIBA_MOUSE	sp|E9PV24|FIBA_MOUSE Fibrinogen alpha chain OS=Mus musculus GN=Fga PE=1 SV=1	330260000	558900000	560180000	461250000	512180000	533140000	482600000	593390000	804910000	481270000	465590000	597840000
sp|E9Q7X6|HEG1_MOUSE	sp|E9Q7X6|HEG1_MOUSE	sp|E9Q7X6|HEG1_MOUSE Protein HEG homolog 1 OS=Mus musculus GN=Heg1 PE=1 SV=1							16434000
sp|O08553|DPYL2_MOUSE;tr|Q71H75|Q71H75_MOUSE;tr|Q3TY94|Q3TY94_MOUSE	sp|O08553|DPYL2_MOUSE	sp|O08553|DPYL2_MOUSE Dihydropyrimidinase-related protein 2 OS=Mus musculus GN=Dpysl2 PE=1 SV=2	91797500	34341000			234110000	116980000	118410000		106530000	149770000	267930000	76381000
sp|O08640|KRA14_MOUSE	sp|O08640|KRA14_MOUSE	sp|O08640|KRA14_MOUSE Keratin-associated protein 14 OS=Mus musculus GN=Krtap14 PE=2 SV=1					244990000
sp|O08749|DLDH_MOUSE;tr|Q3TIE8|Q3TIE8_MOUSE	sp|O08749|DLDH_MOUSE;tr|Q3TIE8|Q3TIE8_MOUSE	sp|O08749|DLDH_MOUSE Dihydrolipoyl dehydrogenase, mitochondrial OS=Mus musculus GN=Dld PE=1 SV=2;tr|Q3TIE8|Q3TIE8_MOUSE Dihydrolipoyl dehydrogenase OS=Mus musculus GN=Dld PE=2 SV=1					139340000	124630000	66326000		43451000		60826000
sp|O08842|GFRA2_MOUSE;tr|Q3UET6|Q3UET6_MOUSE	sp|O08842|GFRA2_MOUSE	sp|O08842|GFRA2_MOUSE GDNF family receptor alpha-2 OS=Mus musculus GN=Gfra2 PE=1 SV=2		15080000	22434000	27179000			18433000					10119000
sp|O08911|MK12_MOUSE	sp|O08911|MK12_MOUSE	sp|O08911|MK12_MOUSE Mitogen-activated protein kinase 12 OS=Mus musculus GN=Mapk12 PE=1 SV=1							6216600
sp|O08997|ATOX1_MOUSE	sp|O08997|ATOX1_MOUSE	sp|O08997|ATOX1_MOUSE Copper transport protein ATOX1 OS=Mus musculus GN=Atox1 PE=1 SV=1					71601000							54872000
sp|O09114|PTGDS_MOUSE	sp|O09114|PTGDS_MOUSE	sp|O09114|PTGDS_MOUSE Prostaglandin-H2 D-isomerase OS=Mus musculus GN=Ptgds PE=1 SV=1	23563500000	40030000000	46893000000	56971000000	20612000000	25300000000	25014000000	24657000000	33966000000	22319000000	21334000000	22089000000
sp|O09131|GSTO1_MOUSE;tr|D3Z1Q9|D3Z1Q9_MOUSE;tr|Q9D2J1|Q9D2J1_MOUSE;tr|Q9D2S1|Q9D2S1_MOUSE;tr|Q8BW12|Q8BW12_MOUSE;sp|Q8K2Q2|GSTO2_MOUSE	sp|O09131|GSTO1_MOUSE;tr|D3Z1Q9|D3Z1Q9_MOUSE;tr|Q9D2J1|Q9D2J1_MOUSE;tr|Q9D2S1|Q9D2S1_MOUSE;tr|Q8BW12|Q8BW12_MOUSE;sp|Q8K2Q2|GSTO2_MOUSE	sp|O09131|GSTO1_MOUSE Glutathione S-transferase omega-1 OS=Mus musculus GN=Gsto1 PE=1 SV=2;tr|D3Z1Q9|D3Z1Q9_MOUSE Glutathione S-transferase omega-2 (Fragment) OS=Mus musculus GN=Gsto2 PE=1 SV=1;tr|Q9D2J1|Q9D2J1_MOUSE Uncharacterized protein OS=Mus musculus							6336000
sp|O35136|NCAM2_MOUSE;tr|Q3V1M4|Q3V1M4_MOUSE	sp|O35136|NCAM2_MOUSE;tr|Q3V1M4|Q3V1M4_MOUSE	sp|O35136|NCAM2_MOUSE Neural cell adhesion molecule 2 OS=Mus musculus GN=Ncam2 PE=1 SV=1;tr|Q3V1M4|Q3V1M4_MOUSE Uncharacterized protein OS=Mus musculus GN=Ncam2 PE=2 SV=1		19176000							25094000
sp|O35684|NEUS_MOUSE;tr|E0CYW0|E0CYW0_MOUSE	sp|O35684|NEUS_MOUSE	sp|O35684|NEUS_MOUSE Neuroserpin OS=Mus musculus GN=Serpini1 PE=1 SV=1		42011000		44804000			28286000		39833000			31523000
sp|O54962|BAF_MOUSE	sp|O54962|BAF_MOUSE	sp|O54962|BAF_MOUSE Barrier-to-autointegration factor OS=Mus musculus GN=Banf1 PE=1 SV=1							11428000
sp|O55042|SYUA_MOUSE	sp|O55042|SYUA_MOUSE	sp|O55042|SYUA_MOUSE Alpha-synuclein OS=Mus musculus GN=Snca PE=1 SV=2	51513000
sp|O55234|PSB5_MOUSE;tr|Q8BTY5|Q8BTY5_MOUSE	sp|O55234|PSB5_MOUSE;tr|Q8BTY5|Q8BTY5_MOUSE	sp|O55234|PSB5_MOUSE Proteasome subunit beta type-5 OS=Mus musculus GN=Psmb5 PE=1 SV=3;tr|Q8BTY5|Q8BTY5_MOUSE Uncharacterized protein OS=Mus musculus GN=Psmb5 PE=2 SV=1										14336000
sp|O70362|PHLD_MOUSE	sp|O70362|PHLD_MOUSE	sp|O70362|PHLD_MOUSE Phosphatidylinositol-glycan-specific phospholipase D OS=Mus musculus GN=Gpld1 PE=1 SV=1				8016000
sp|O88492|PLIN4_MOUSE	sp|O88492|PLIN4_MOUSE	sp|O88492|PLIN4_MOUSE Perilipin-4 OS=Mus musculus GN=Plin4 PE=1 SV=2					159810000	111690000
sp|O88783|FA5_MOUSE;tr|Q8C7H9|Q8C7H9_MOUSE	sp|O88783|FA5_MOUSE	sp|O88783|FA5_MOUSE Coagulation factor V OS=Mus musculus GN=F5 PE=1 SV=1	43334000	79298000	51602000	129010000	31588000	72719000	77483000	106540000	86249000	34940000	46255000	68172000
sp|O88968|TCO2_MOUSE	sp|O88968|TCO2_MOUSE	sp|O88968|TCO2_MOUSE Transcobalamin-2 OS=Mus musculus GN=Tcn2 PE=1 SV=1	49065500	69497000	89178000	103830000	60446000	79238000	52876000	57976000	81556000	46447000	47307000	48993000
sp|O88990|ACTN3_MOUSE;tr|Q3UYE4|Q3UYE4_MOUSE	sp|O88990|ACTN3_MOUSE	sp|O88990|ACTN3_MOUSE Alpha-actinin-3 OS=Mus musculus GN=Actn3 PE=2 SV=1											26525000
sp|O89020|AFAM_MOUSE;CON__REFSEQ:XP_585019	sp|O89020|AFAM_MOUSE	sp|O89020|AFAM_MOUSE Afamin OS=Mus musculus GN=Afm PE=1 SV=2	832540000	653410000	586440000	639720000	450300000	407320000	594130000	673240000	653650000	835850000	724900000	709340000
sp|P00687|AMY1_MOUSE;tr|D3YYQ5|D3YYQ5_MOUSE;tr|Q99KE6|Q99KE6_MOUSE;tr|G3UXY7|G3UXY7_MOUSE;tr|Q8C5B4|Q8C5B4_MOUSE;sp|P00688|AMYP_MOUSE;tr|Q61299|Q61299_MOUSE;tr|Q61297|Q61297_MOUSE;tr|Q61298|Q61298_MOUSE;tr|E9PV85|E9PV85_MOUSE;CON__Q3MHH8	sp|P00687|AMY1_MOUSE;tr|D3YYQ5|D3YYQ5_MOUSE	sp|P00687|AMY1_MOUSE Alpha-amylase 1 OS=Mus musculus GN=Amy1 PE=1 SV=2;tr|D3YYQ5|D3YYQ5_MOUSE Alpha-amylase 1 (Fragment) OS=Mus musculus GN=Amy1 PE=1 SV=2		45288000	42458000	41397000		29314000	28639000	33610000	37457000		31063000	44954000
sp|P00920|CAH2_MOUSE;tr|A0A0A6YX78|A0A0A6YX78_MOUSE	sp|P00920|CAH2_MOUSE	sp|P00920|CAH2_MOUSE Carbonic anhydrase 2 OS=Mus musculus GN=Ca2 PE=1 SV=4	6695650000	1645300000	3142300000	1599200000	3498000000	2502200000	3425000000	3807100000	1909000000	5884700000	2848100000	4855700000
sp|P01027|CO3_MOUSE;tr|Q207D2|Q207D2_MOUSE;tr|E1APH6|E1APH6_MOUSE;tr|B5APU1|B5APU1_MOUSE;CON__Q2UVX4;tr|H3BKW9|H3BKW9_MOUSE;tr|H3BL60|H3BL60_MOUSE	sp|P01027|CO3_MOUSE	sp|P01027|CO3_MOUSE Complement C3 OS=Mus musculus GN=C3 PE=1 SV=3	4675300000	5682900000	5955100000	4763300000	6208200000	3914800000	5118300000	6240200000	5918100000	9495200000	5374700000	5647300000
sp|P01592|IGJ_MOUSE	sp|P01592|IGJ_MOUSE	sp|P01592|IGJ_MOUSE Immunoglobulin J chain OS=Mus musculus GN=Jchain PE=1 SV=4	146620000	104300000	76208000	66757000	70094000	175580000	71889000	83716000	595060000		199450000	117970000
sp|P01631|KV2A7_MOUSE;tr|Q5F2I0|Q5F2I0_MOUSE	sp|P01631|KV2A7_MOUSE;tr|Q5F2I0|Q5F2I0_MOUSE	sp|P01631|KV2A7_MOUSE Ig kappa chain V-II region 26-10 OS=Mus musculus PE=1 SV=1;tr|Q5F2I0|Q5F2I0_MOUSE Kappa light chain variable region (Fragment) OS=Mus musculus GN=IgG1 anti-TS1 VL PE=2 SV=1	7981600
sp|P01668|KV3AG_MOUSE;sp|P01666|KV3AE_MOUSE;sp|P01665|KV3AD_MOUSE;sp|P01664|KV3AC_MOUSE;tr|A0A140T8Q4|A0A140T8Q4_MOUSE;tr|A0A140T8Q0|A0A140T8Q0_MOUSE;tr|A0A097PUG4|A0A097PUG4_MOUSE	sp|P01668|KV3AG_MOUSE;sp|P01666|KV3AE_MOUSE;sp|P01665|KV3AD_MOUSE;sp|P01664|KV3AC_MOUSE;tr|A0A140T8Q4|A0A140T8Q4_MOUSE;tr|A0A140T8Q0|A0A140T8Q0_MOUSE;tr|A0A097PUG4|A0A097PUG4_MOUSE	sp|P01668|KV3AG_MOUSE Ig kappa chain V-III region PC 7210 OS=Mus musculus PE=1 SV=1;sp|P01666|KV3AE_MOUSE Ig kappa chain V-III region PC 7183 OS=Mus musculus PE=1 SV=1;sp|P01665|KV3AD_MOUSE Ig kappa chain V-III region PC 7043 OS=Mus musculus PE=1 SV=1;sp|P
sp|P01844|LAC2_MOUSE;tr|Q99JC1|Q99JC1_MOUSE;sp|P01845|LAC3_MOUSE;tr|A0A0G2JGQ8|A0A0G2JGQ8_MOUSE	sp|P01844|LAC2_MOUSE;tr|Q99JC1|Q99JC1_MOUSE;sp|P01845|LAC3_MOUSE;tr|A0A0G2JGQ8|A0A0G2JGQ8_MOUSE	sp|P01844|LAC2_MOUSE Ig lambda-2 chain C region OS=Mus musculus GN=Iglc2 PE=1 SV=1;tr|Q99JC1|Q99JC1_MOUSE Ig lambda-2 chain C region (Fragment) OS=Mus musculus GN=Iglc2 PE=1 SV=1;sp|P01845|LAC3_MOUSE Ig lambda-3 chain C region OS=Mus musculus GN=Iglc3 PE=1	41485000	23243000		24217000			28149000	63795000			32623000
sp|P01887|B2MG_MOUSE;tr|Q9D239|Q9D239_MOUSE;tr|Q3U679|Q3U679_MOUSE;tr|Q91Z73|Q91Z73_MOUSE;tr|Q91Z72|Q91Z72_MUSMM	sp|P01887|B2MG_MOUSE;tr|Q9D239|Q9D239_MOUSE;tr|Q3U679|Q3U679_MOUSE;tr|Q91Z73|Q91Z73_MOUSE	sp|P01887|B2MG_MOUSE Beta-2-microglobulin OS=Mus musculus GN=B2m PE=1 SV=2;tr|Q9D239|Q9D239_MOUSE Beta-2-microglobulin OS=Mus musculus GN=B2m PE=2 SV=1;tr|Q3U679|Q3U679_MOUSE Beta-2-microglobulin OS=Mus musculus GN=B2m PE=2 SV=1;tr|Q91Z73|Q91Z73_MOUSE Beta	360840000	580120000	657570000	653370000	356150000	470620000	476080000	458620000	701420000	531860000	508400000	623600000
sp|P01898|HA10_MOUSE;tr|Q8HWL1|Q8HWL1_MOUSE;tr|Q61860|Q61860_MOUSE;tr|Q31190|Q31190_MOUSE;tr|V9GXI4|V9GXI4_MOUSE;tr|Q4VCN1|Q4VCN1_MOUSE;tr|Q4VCP1|Q4VCP1_MOUSE;tr|Q4VCN0|Q4VCN0_MOUSE;tr|Q4VCM9|Q4VCM9_MOUSE;tr|Q4VCM8|Q4VCM8_MOUSE;tr|Q4VCM7|Q4VCM7_MOUSE;tr|Q0WXI7|Q0WXI7_MOUSE;tr|Q0WXH7|Q0WXH7_MOUSE;tr|O78206|O78206_MOUSE;tr|Q4VCP2|Q4VCP2_MOUSE;tr|V9GXR0|V9GXR0_MOUSE;tr|Q4VCN4|Q4VCN4_MOUSE;tr|K7X379|…	sp|P01898|HA10_MOUSE	sp|P01898|HA10_MOUSE H-2 class I histocompatibility antigen, Q10 alpha chain OS=Mus musculus GN=H2-Q10 PE=1 SV=3		50400000		48905000	58063000	106180000	76339000	95345000	71471000	83741000	120620000	96588000
sp|P02104|HBE_MOUSE;tr|Q9D0B2|Q9D0B2_MOUSE;tr|Q9CR49|Q9CR49_MOUSE	sp|P02104|HBE_MOUSE;tr|Q9D0B2|Q9D0B2_MOUSE;tr|Q9CR49|Q9CR49_MOUSE	sp|P02104|HBE_MOUSE Hemoglobin subunit epsilon-Y2 OS=Mus musculus GN=Hbb-y PE=1 SV=2;tr|Q9D0B2|Q9D0B2_MOUSE Uncharacterized protein OS=Mus musculus GN=Hbb-y PE=2 SV=1;tr|Q9CR49|Q9CR49_MOUSE Globin b1 OS=Mus musculus GN=Hbb-y PE=1 SV=1								63429000
sp|P02802|MT1_MOUSE	sp|P02802|MT1_MOUSE	sp|P02802|MT1_MOUSE Metallothionein-1 OS=Mus musculus GN=Mt1 PE=1 SV=1										27275000
sp|P03977|KV3A4_MOUSE;sp|P01656|KV3A3_MOUSE;sp|P01654|KV3A1_MOUSE;sp|P01655|KV3A2_MOUSE;tr|Q920E9|Q920E9_MOUSE;tr|Q65ZN3|Q65ZN3_MOUSE;sp|P01673|KV3AL_MOUSE;sp|P01672|KV3AK_MOUSE;sp|P01671|KV3AJ_MOUSE;sp|P01670|KV3AI_MOUSE;sp|P01669|KV3AH_MOUSE;sp|P01667|KV3AF_MOUSE;sp|P01660|KV3A8_MOUSE;sp|P01659|KV3A7_MOUSE;tr|U5JE80|U5JE80_MOUSE;tr|A0A075B5P0|A0A075B5P0_MOUSE	sp|P03977|KV3A4_MOUSE;sp|P01656|KV3A3_MOUSE;sp|P01654|KV3A1_MOUSE;sp|P01655|KV3A2_MOUSE;tr|Q920E9|Q920E9_MOUSE;tr|Q65ZN3|Q65ZN3_MOUSE;sp|P01673|KV3AL_MOUSE;sp|P01672|KV3AK_MOUSE;sp|P01671|KV3AJ_MOUSE;sp|P01670|KV3AI_MOUSE;sp|P01669|KV3AH_MOUSE;sp|P01667|KV3AF_MOUSE;sp|P01660|KV3A8_MOUSE;sp|P01659|KV3A7_MOUSE;tr|U5JE80|U5JE80_MOUSE;tr|A0A075B5P0|A0A075B5P0_MOUSE	sp|P03977|KV3A4_MOUSE Ig kappa chain V-III region 50S10.1 OS=Mus musculus PE=1 SV=1;sp|P01656|KV3A3_MOUSE Ig kappa chain V-III region MOPC 70 OS=Mus musculus PE=1 SV=1;sp|P01654|KV3A1_MOUSE Ig kappa chain V-III region PC 2880/PC 1229 OS=Mus musculus PE=1 S	102216500	124970000	55946000	64088000	130200000	96243000	76240000	156270000	47727000	43679000	120200000	108210000
sp|P03995|GFAP_MOUSE;tr|A0MTM0|A0MTM0_MOUSE;tr|Q4L0E6|Q4L0E6_MOUSE	sp|P03995|GFAP_MOUSE	sp|P03995|GFAP_MOUSE Glial fibrillary acidic protein OS=Mus musculus GN=Gfap PE=1 SV=4		41684000			317550000	47057000	19260000	157490000		52380000	554920000
sp|P05063|ALDOC_MOUSE	sp|P05063|ALDOC_MOUSE	sp|P05063|ALDOC_MOUSE Fructose-bisphosphate aldolase C OS=Mus musculus GN=Aldoc PE=1 SV=4		18141000			40971000	26606000		37718000	16688000	93521000	61835000	38890000
sp|P05201|AATC_MOUSE;tr|F7ALS6|F7ALS6_MOUSE	sp|P05201|AATC_MOUSE	sp|P05201|AATC_MOUSE Aspartate aminotransferase, cytoplasmic OS=Mus musculus GN=Got1 PE=1 SV=3	884400000	741150000	610590000	576640000	593100000	693940000	576810000	451870000	326950000	282560000	601820000	381060000
sp|P05202|AATM_MOUSE	sp|P05202|AATM_MOUSE	sp|P05202|AATM_MOUSE Aspartate aminotransferase, mitochondrial OS=Mus musculus GN=Got2 PE=1 SV=1	65616000	30275000			168970000	242250000	91943000	35709000	25681000	20845000	45317000	27055000
sp|P06683|CO9_MOUSE;tr|A0A0R4J032|A0A0R4J032_MOUSE;tr|H3BKN4|H3BKN4_MOUSE	sp|P06683|CO9_MOUSE;tr|A0A0R4J032|A0A0R4J032_MOUSE	sp|P06683|CO9_MOUSE Complement component C9 OS=Mus musculus GN=C9 PE=1 SV=2;tr|A0A0R4J032|A0A0R4J032_MOUSE Complement component 9 OS=Mus musculus GN=C9 PE=1 SV=1		44675000	40646000	37904000	26272000	32291000	36179000	60904000	39776000	29705000	45109000	49432000
sp|P06684|CO5_MOUSE;tr|Q8BNV3|Q8BNV3_MOUSE;tr|Q99KX9|Q99KX9_MOUSE;tr|A0A0J9YUU3|A0A0J9YUU3_MOUSE	sp|P06684|CO5_MOUSE	sp|P06684|CO5_MOUSE Complement C5 OS=Mus musculus GN=C5 PE=1 SV=2	35901500	33220000			18356000		32458000	91206000	42822000	141150000	108590000	91940000
sp|P06728|APOA4_MOUSE;tr|Q9DBN0|Q9DBN0_MOUSE;tr|Q810I7|Q810I7_MOUSE;tr|Q01488|Q01488_MUSMC	sp|P06728|APOA4_MOUSE;tr|Q9DBN0|Q9DBN0_MOUSE;tr|Q810I7|Q810I7_MOUSE;tr|Q01488|Q01488_MUSMC	sp|P06728|APOA4_MOUSE Apolipoprotein A-IV OS=Mus musculus GN=Apoa4 PE=1 SV=3;tr|Q9DBN0|Q9DBN0_MOUSE Uncharacterized protein OS=Mus musculus GN=Apoa4 PE=2 SV=1;tr|Q810I7|Q810I7_MOUSE Apoa4 protein OS=Mus musculus GN=Apoa4 PE=2 SV=1;tr|Q01488|Q01488_MUSMC Ap	2578000000	3381100000	2642300000	3320500000	2753900000	2827300000	4289900000	3442700000	3537600000	4121900000	3477500000	4526500000
sp|P06745|G6PI_MOUSE;tr|B7ZWL9|B7ZWL9_MOUSE;tr|B2RXT5|B2RXT5_MOUSE;tr|A0A0U1RP97|A0A0U1RP97_MOUSE;tr|A0A0U1RQ72|A0A0U1RQ72_MOUSE;tr|A0A0U1RQ18|A0A0U1RQ18_MOUSE;CON__Q3ZBD7	sp|P06745|G6PI_MOUSE;tr|B7ZWL9|B7ZWL9_MOUSE;tr|B2RXT5|B2RXT5_MOUSE	sp|P06745|G6PI_MOUSE Glucose-6-phosphate isomerase OS=Mus musculus GN=Gpi PE=1 SV=4;tr|B7ZWL9|B7ZWL9_MOUSE Glucose-6-phosphate isomerase OS=Mus musculus GN=Gpi1 PE=2 SV=1;tr|B2RXT5|B2RXT5_MOUSE Glucose-6-phosphate isomerase OS=Mus musculus GN=Gpi1 PE=2 SV=	2131950000	1027700000	842140000	612510000	1232200000	1038500000	1324100000	773980000	728770000	802680000	1389300000	1064100000
sp|P06909|CFAH_MOUSE;tr|E9Q8I0|E9Q8I0_MOUSE;tr|D6RGQ0|D6RGQ0_MOUSE;tr|E9Q8H9|E9Q8H9_MOUSE;tr|A0A0A6YVP8|A0A0A6YVP8_MOUSE;tr|A0A0A6YWP4|A0A0A6YWP4_MOUSE;tr|Q8C5S1|Q8C5S1_MOUSE	sp|P06909|CFAH_MOUSE;tr|E9Q8I0|E9Q8I0_MOUSE;tr|D6RGQ0|D6RGQ0_MOUSE;tr|E9Q8H9|E9Q8H9_MOUSE;tr|A0A0A6YVP8|A0A0A6YVP8_MOUSE;tr|A0A0A6YWP4|A0A0A6YWP4_MOUSE	sp|P06909|CFAH_MOUSE Complement factor H OS=Mus musculus GN=Cfh PE=1 SV=2;tr|E9Q8I0|E9Q8I0_MOUSE Complement factor H OS=Mus musculus GN=Cfh PE=1 SV=1;tr|D6RGQ0|D6RGQ0_MOUSE Complement factor H OS=Mus musculus GN=Cfh PE=1 SV=1;tr|E9Q8H9|E9Q8H9_MOUSE Complem	2374650000	3773600000	3997900000	3997300000	2102700000	2802000000	2563700000	3058700000	3312100000	2656000000	2215800000	2428800000
sp|P07361|A1AG2_MOUSE;tr|J3JRU4|J3JRU4_MOUSE;sp|Q63805|A1AG3_MOUSE;tr|B9EIY6|B9EIY6_MOUSE;tr|B7ZP06|B7ZP06_MOUSE	sp|P07361|A1AG2_MOUSE	sp|P07361|A1AG2_MOUSE Alpha-1-acid glycoprotein 2 OS=Mus musculus GN=Orm2 PE=1 SV=1					95245000
sp|P07758|A1AT1_MOUSE;tr|A0A0A0MQA3|A0A0A0MQA3_MOUSE	sp|P07758|A1AT1_MOUSE;tr|A0A0A0MQA3|A0A0A0MQA3_MOUSE	sp|P07758|A1AT1_MOUSE Alpha-1-antitrypsin 1-1 OS=Mus musculus GN=Serpina1a PE=1 SV=4;tr|A0A0A0MQA3|A0A0A0MQA3_MOUSE Alpha-1-antitrypsin 1-1 OS=Mus musculus GN=Serpina1a PE=1 SV=1	158380000	66385000	146430000	167180000	70758000	79172000	173610000	143680000	45361000		337180000	271360000
sp|P08003|PDIA4_MOUSE;tr|A0A0R4J0Z1|A0A0R4J0Z1_MOUSE	sp|P08003|PDIA4_MOUSE;tr|A0A0R4J0Z1|A0A0R4J0Z1_MOUSE	sp|P08003|PDIA4_MOUSE Protein disulfide-isomerase A4 OS=Mus musculus GN=Pdia4 PE=1 SV=3;tr|A0A0R4J0Z1|A0A0R4J0Z1_MOUSE Protein disulfide-isomerase A4 OS=Mus musculus GN=Pdia4 PE=1 SV=1						6661100
sp|P08030|APT_MOUSE;tr|A0A1D5RLR6|A0A1D5RLR6_MOUSE	sp|P08030|APT_MOUSE;tr|A0A1D5RLR6|A0A1D5RLR6_MOUSE	sp|P08030|APT_MOUSE Adenine phosphoribosyltransferase OS=Mus musculus GN=Aprt PE=1 SV=2;tr|A0A1D5RLR6|A0A1D5RLR6_MOUSE Adenine phosphoribosyltransferase OS=Mus musculus GN=Aprt PE=1 SV=1					9889700
sp|P08032|SPTA1_MOUSE;tr|Q3UQ30|Q3UQ30_MOUSE;tr|Q8C3F9|Q8C3F9_MOUSE	sp|P08032|SPTA1_MOUSE	sp|P08032|SPTA1_MOUSE Spectrin alpha chain, erythrocytic 1 OS=Mus musculus GN=Spta1 PE=1 SV=3	351370000				13271000	208150000	48944000	89737000		1779700000	195280000	642670000
sp|P08228|SODC_MOUSE;tr|Q8C355|Q8C355_MOUSE	sp|P08228|SODC_MOUSE	sp|P08228|SODC_MOUSE Superoxide dismutase [Cu-Zn] OS=Mus musculus GN=Sod1 PE=1 SV=2	4153700000	1737800000	2314600000	1749800000	2389500000	1806500000	2081700000	1754800000	2515600000	2811100000	2168800000	2386200000
sp|P08249|MDHM_MOUSE;tr|A0A0G2JF23|A0A0G2JF23_MOUSE;tr|A0A0G2JGY4|A0A0G2JGY4_MOUSE	sp|P08249|MDHM_MOUSE	sp|P08249|MDHM_MOUSE Malate dehydrogenase, mitochondrial OS=Mus musculus GN=Mdh2 PE=1 SV=3	639080000	346670000	356880000	162040000	849030000	751030000	667030000	336260000	333350000	237990000	447350000	283720000
sp|P08551|NFL_MOUSE;tr|Q05DD2|Q05DD2_MOUSE	sp|P08551|NFL_MOUSE;tr|Q05DD2|Q05DD2_MOUSE	sp|P08551|NFL_MOUSE Neurofilament light polypeptide OS=Mus musculus GN=Nefl PE=1 SV=5;tr|Q05DD2|Q05DD2_MOUSE Nefl protein (Fragment) OS=Mus musculus GN=Nefl PE=2 SV=1											11172000
sp|P08752|GNAI2_MOUSE;tr|A0A0A6YWA9|A0A0A6YWA9_MOUSE;tr|Q9JJ21|Q9JJ21_MOUSE;tr|A2A610|A2A610_MOUSE;tr|A2AE31|A2AE31_MOUSE;tr|Q8C040|Q8C040_MOUSE;tr|Q9WUC0|Q9WUC0_MOUSE;tr|Q8BHK8|Q8BHK8_MOUSE;tr|A2AE32|A2AE32_MOUSE;tr|Q9D7B3|Q9D7B3_MOUSE;sp|P20612|GNAT1_MOUSE;tr|Q3TJH1|Q3TJH1_MOUSE;tr|B2RVZ3|B2RVZ3_MOUSE;tr|A2AE33|A2AE33_MOUSE;sp|Q9DC51|GNAI3_MOUSE;sp|Q3V3I2|GNAT3_MOUSE;sp|P50149|GNAT2_MOUSE;sp|B2…	sp|P08752|GNAI2_MOUSE;tr|A0A0A6YWA9|A0A0A6YWA9_MOUSE	sp|P08752|GNAI2_MOUSE Guanine nucleotide-binding protein G(i) subunit alpha-2 OS=Mus musculus GN=Gnai2 PE=1 SV=5;tr|A0A0A6YWA9|A0A0A6YWA9_MOUSE Guanine nucleotide-binding protein G(i) subunit alpha-2 (Fragment) OS=Mus musculus GN=Gnai2 PE=1 SV=1					37267000
sp|P09411|PGK1_MOUSE;tr|S4R2M7|S4R2M7_MOUSE;sp|P09041|PGK2_MOUSE;tr|B0LAA9|B0LAA9_MOUSE	sp|P09411|PGK1_MOUSE;tr|S4R2M7|S4R2M7_MOUSE	sp|P09411|PGK1_MOUSE Phosphoglycerate kinase 1 OS=Mus musculus GN=Pgk1 PE=1 SV=4;tr|S4R2M7|S4R2M7_MOUSE Phosphoglycerate kinase OS=Mus musculus GN=Pgk1 PE=1 SV=1	2926350000	1611500000	1452800000	1070000000	2199900000	1623100000	2312100000	1384400000	1331300000	1274700000	2018300000	2025800000
sp|P09535|IGF2_MOUSE;tr|D3Z4N4|D3Z4N4_MOUSE;tr|J3QJZ9|J3QJZ9_MOUSE;tr|B0LAD8|B0LAD8_MOUSE	sp|P09535|IGF2_MOUSE;tr|D3Z4N4|D3Z4N4_MOUSE	sp|P09535|IGF2_MOUSE Insulin-like growth factor II OS=Mus musculus GN=Igf2 PE=1 SV=1;tr|D3Z4N4|D3Z4N4_MOUSE Insulin-like growth factor II (Fragment) OS=Mus musculus GN=Igf2 PE=1 SV=2	189555000	454940000	578320000	572130000	199210000	400250000	309280000	310110000	451450000	262930000	202510000	250250000
sp|P09813|APOA2_MOUSE;tr|A7YL62|A7YL62_MOUSE;tr|Q6LD55|Q6LD55_MOUSE	sp|P09813|APOA2_MOUSE;tr|A7YL62|A7YL62_MOUSE	sp|P09813|APOA2_MOUSE Apolipoprotein A-II OS=Mus musculus GN=Apoa2 PE=1 SV=2;tr|A7YL62|A7YL62_MOUSE Apolipoprotein A-II OS=Mus musculus GN=Apoa2 PE=4 SV=1	869790000	574880000	308910000	571660000	750570000	680910000	1379000000	1377000000	1687000000	2117900000	1821400000	1901600000
sp|P0DP28|CALM3_MOUSE;sp|P0DP27|CALM2_MOUSE;sp|P0DP26|CALM1_MOUSE;tr|Q3UKW2|Q3UKW2_MOUSE;sp|Q9D6P8|CALL3_MOUSE;tr|A0A1Y7VK66|A0A1Y7VK66_MOUSE;tr|G3UX57|G3UX57_MOUSE;tr|G3UZ90|G3UZ90_MOUSE	sp|P0DP28|CALM3_MOUSE;sp|P0DP27|CALM2_MOUSE;sp|P0DP26|CALM1_MOUSE;tr|Q3UKW2|Q3UKW2_MOUSE	sp|P0DP28|CALM3_MOUSE Calmodulin-3 OS=Mus musculus GN=Calm3 PE=1 SV=1;sp|P0DP27|CALM2_MOUSE Calmodulin-2 OS=Mus musculus GN=Calm2 PE=1 SV=1;sp|P0DP26|CALM1_MOUSE Calmodulin-1 OS=Mus musculus GN=Calm1 PE=1 SV=1;tr|Q3UKW2|Q3UKW2_MOUSE Calmodulin-1 OS=Mus mus	471975000	446760000	394020000	370940000	1044800000	710350000	773190000	524750000	658110000	838590000	967730000	716760000
sp|P0DP60|LYNX1_MOUSE	sp|P0DP60|LYNX1_MOUSE	sp|P0DP60|LYNX1_MOUSE Ly-6/neurotoxin-like protein 1 OS=Mus musculus GN=Lynx1 PE=1 SV=1					19682000		37033000		29726000
sp|P10493|NID1_MOUSE	sp|P10493|NID1_MOUSE	sp|P10493|NID1_MOUSE Nidogen-1 OS=Mus musculus GN=Nid1 PE=1 SV=2		27187000		23866000
sp|P10639|THIO_MOUSE	sp|P10639|THIO_MOUSE	sp|P10639|THIO_MOUSE Thioredoxin OS=Mus musculus GN=Txn PE=1 SV=3	263585000	126180000			353820000	220680000	264690000	140560000		230440000	161240000	320850000
sp|P10649|GSTM1_MOUSE;tr|A2AE89|A2AE89_MOUSE;tr|F6WHQ7|F6WHQ7_MOUSE;tr|Q7M0F3|Q7M0F3_MOUSE;tr|D3YVP8|D3YVP8_MOUSE	sp|P10649|GSTM1_MOUSE;tr|A2AE89|A2AE89_MOUSE	sp|P10649|GSTM1_MOUSE Glutathione S-transferase Mu 1 OS=Mus musculus GN=Gstm1 PE=1 SV=2;tr|A2AE89|A2AE89_MOUSE Glutathione S-transferase Mu 1 OS=Mus musculus GN=Gstm1 PE=1 SV=2	1044950000	576240000	369190000	369390000	1029200000	929890000	1133800000	584770000	752850000	541400000	910880000	812090000
sp|P11087|CO1A1_MOUSE;tr|Q99LL6|Q99LL6_MOUSE;tr|Q60785|Q60785_MOUSE;CON__Q862S4;tr|Q61022|Q61022_MOUSE	sp|P11087|CO1A1_MOUSE;tr|Q99LL6|Q99LL6_MOUSE	sp|P11087|CO1A1_MOUSE Collagen alpha-1(I) chain OS=Mus musculus GN=Col1a1 PE=1 SV=4;tr|Q99LL6|Q99LL6_MOUSE Col1a1 protein (Fragment) OS=Mus musculus GN=Col1a1 PE=2 SV=1	307240000	474690000	470450000	484670000	652650000	481580000	561920000	376960000	243480000	109230000	178660000	182200000
sp|P11352|GPX1_MOUSE;tr|A0A0A6YVV2|A0A0A6YVV2_MOUSE;tr|A0A0A6YY34|A0A0A6YY34_MOUSE	sp|P11352|GPX1_MOUSE;tr|A0A0A6YVV2|A0A0A6YVV2_MOUSE;tr|A0A0A6YY34|A0A0A6YY34_MOUSE	sp|P11352|GPX1_MOUSE Glutathione peroxidase 1 OS=Mus musculus GN=Gpx1 PE=1 SV=2;tr|A0A0A6YVV2|A0A0A6YVV2_MOUSE Glutathione peroxidase OS=Mus musculus GN=Gpx1 PE=1 SV=1;tr|A0A0A6YY34|A0A0A6YY34_MOUSE Glutathione peroxidase OS=Mus musculus GN=Gpx1 PE=1 SV=1	521185000	68657000	175830000	59910000	209760000	269470000	226950000	176610000	122100000	361420000	176870000	303220000
sp|P11589|MUP2_MOUSE;tr|Q8JZT0|Q8JZT0_MOUSE	sp|P11589|MUP2_MOUSE;tr|Q8JZT0|Q8JZT0_MOUSE	sp|P11589|MUP2_MOUSE Major urinary protein 2 OS=Mus musculus GN=Mup2 PE=1 SV=1;tr|Q8JZT0|Q8JZT0_MOUSE Mup1 protein OS=Mus musculus PE=2 SV=1	909340000	3709600000	2772900000	2945600000	706290000	419240000	2016200000	3942800000	4408300000	2228900000	1788100000	2800900000
sp|P12399|CTL2A_MOUSE;tr|A0A286YDF0|A0A286YDF0_MOUSE	sp|P12399|CTL2A_MOUSE;tr|A0A286YDF0|A0A286YDF0_MOUSE	sp|P12399|CTL2A_MOUSE Protein CTLA-2-alpha OS=Mus musculus GN=Ctla2a PE=2 SV=2;tr|A0A286YDF0|A0A286YDF0_MOUSE Uncharacterized protein OS=Mus musculus PE=4 SV=1								21507000
sp|P12787|COX5A_MOUSE	sp|P12787|COX5A_MOUSE	sp|P12787|COX5A_MOUSE Cytochrome c oxidase subunit 5A, mitochondrial OS=Mus musculus GN=Cox5a PE=1 SV=2							18443000
sp|P12960|CNTN1_MOUSE	sp|P12960|CNTN1_MOUSE	sp|P12960|CNTN1_MOUSE Contactin-1 OS=Mus musculus GN=Cntn1 PE=1 SV=1	415800000	494170000	481300000	571740000	242580000	328690000	290420000	323780000	397430000	352870000	293380000	243910000
sp|P13020|GELS_MOUSE;tr|A0A0J9YUQ8|A0A0J9YUQ8_MOUSE;CON__Q3SX14;tr|A0A0J9YUJ8|A0A0J9YUJ8_MOUSE	sp|P13020|GELS_MOUSE;tr|A0A0J9YUQ8|A0A0J9YUQ8_MOUSE	sp|P13020|GELS_MOUSE Gelsolin OS=Mus musculus GN=Gsn PE=1 SV=3;tr|A0A0J9YUQ8|A0A0J9YUQ8_MOUSE Gelsolin (Fragment) OS=Mus musculus GN=Gsn PE=1 SV=1	4564550000	5324200000	4311500000	6494300000	3518500000	4426800000	5005500000	3824900000	4509900000	2975500000	2681500000	3168700000
sp|P13634|CAH1_MOUSE;tr|D3YYQ4|D3YYQ4_MOUSE	sp|P13634|CAH1_MOUSE	sp|P13634|CAH1_MOUSE Carbonic anhydrase 1 OS=Mus musculus GN=Ca1 PE=1 SV=4	2528300000	610780000	1320700000	504640000	1621100000	1279500000	1684600000	1747700000	1032400000	2499800000	1174600000	2325400000
sp|P14152|MDHC_MOUSE;tr|B1ATQ3|B1ATQ3_MOUSE	sp|P14152|MDHC_MOUSE	sp|P14152|MDHC_MOUSE Malate dehydrogenase, cytoplasmic OS=Mus musculus GN=Mdh1 PE=1 SV=3	3771050000	2027700000	1711400000	1115500000	2936300000	2259300000	2437400000	1309900000	1603300000	1724300000	3433600000	2419900000
sp|P15105|GLNA_MOUSE;tr|V9GZG5|V9GZG5_MOUSE;tr|D3YVK1|D3YVK1_MOUSE;tr|D3Z121|D3Z121_MOUSE;tr|V9GZP0|V9GZP0_MOUSE	sp|P15105|GLNA_MOUSE;tr|V9GZG5|V9GZG5_MOUSE	sp|P15105|GLNA_MOUSE Glutamine synthetase OS=Mus musculus GN=Glul PE=1 SV=6;tr|V9GZG5|V9GZG5_MOUSE Glutamine synthetase OS=Mus musculus PE=3 SV=1	147430000				123380000	147550000	96146000		130230000	182970000	167550000	116880000
sp|P15327|PMGE_MOUSE;tr|Q3TAQ8|Q3TAQ8_MOUSE;tr|D3Z223|D3Z223_MOUSE;tr|D3YUE8|D3YUE8_MOUSE;tr|D3YYH3|D3YYH3_MOUSE	sp|P15327|PMGE_MOUSE;tr|Q3TAQ8|Q3TAQ8_MOUSE;tr|D3Z223|D3Z223_MOUSE	sp|P15327|PMGE_MOUSE Bisphosphoglycerate mutase OS=Mus musculus GN=Bpgm PE=1 SV=2;tr|Q3TAQ8|Q3TAQ8_MOUSE Phosphoglycerate mutase OS=Mus musculus GN=Bpgm PE=2 SV=1;tr|D3Z223|D3Z223_MOUSE Phosphoglycerate mutase (Fragment) OS=Mus musculus GN=Bpgm PE=1 SV=1	932495000	211090000	271120000	86038000	442460000	417410000	445520000	255310000	225910000	991770000	383050000	614130000
sp|P15626|GSTM2_MOUSE;tr|D3YX76|D3YX76_MOUSE;tr|D3YVP6|D3YVP6_MOUSE;sp|Q80W21|GSTM7_MOUSE;tr|Q7M0F4|Q7M0F4_MOUSE;tr|E9QAC8|E9QAC8_MOUSE;tr|D3YVP5|D3YVP5_MOUSE;tr|F6Y363|F6Y363_MOUSE;tr|D3YZ29|D3YZ29_MOUSE;tr|Q8R5I6|Q8R5I6_MOUSE;tr|A2AE91|A2AE91_MOUSE;tr|D3YVP9|D3YVP9_MOUSE;sp|O35660|GSTM6_MOUSE;tr|Q9D5J8|Q9D5J8_MOUSE;tr|G5E8M7|G5E8M7_MOUSE	sp|P15626|GSTM2_MOUSE;tr|D3YX76|D3YX76_MOUSE	sp|P15626|GSTM2_MOUSE Glutathione S-transferase Mu 2 OS=Mus musculus GN=Gstm2 PE=1 SV=2;tr|D3YX76|D3YX76_MOUSE Glutathione S-transferase OS=Mus musculus GN=Gstm2 PE=1 SV=1	207910000	64553000			118650000	107010000	114190000	80201000	85009000	61759000	126980000	104840000
sp|P16015|CAH3_MOUSE	sp|P16015|CAH3_MOUSE	sp|P16015|CAH3_MOUSE Carbonic anhydrase 3 OS=Mus musculus GN=Ca3 PE=1 SV=3	11545000000	3677800000	3449300000	2144100000	5633800000	3735100000	6347600000	2527000000	4202900000	3092400000	2622800000	5627000000
sp|P16045|LEG1_MOUSE	sp|P16045|LEG1_MOUSE	sp|P16045|LEG1_MOUSE Galectin-1 OS=Mus musculus GN=Lgals1 PE=1 SV=3	288720000	372050000	200210000	233260000	644010000	427340000	498280000	377810000	285800000	310020000	378180000	383370000
sp|P16125|LDHB_MOUSE;tr|D3Z7F0|D3Z7F0_MOUSE;tr|Q5M8R7|Q5M8R7_MOUSE;tr|A0A0N4SVV8|A0A0N4SVV8_MOUSE	sp|P16125|LDHB_MOUSE;tr|D3Z7F0|D3Z7F0_MOUSE	sp|P16125|LDHB_MOUSE L-lactate dehydrogenase B chain OS=Mus musculus GN=Ldhb PE=1 SV=2;tr|D3Z7F0|D3Z7F0_MOUSE L-lactate dehydrogenase (Fragment) OS=Mus musculus GN=Ldhb PE=1 SV=1	612765000	405440000	259020000	223580000	510470000	430090000	381890000	272750000	306270000	466140000	681040000	358460000
sp|P16301|LCAT_MOUSE;tr|Q9CW47|Q9CW47_MOUSE;tr|Q791M3|Q791M3_MOUSE	sp|P16301|LCAT_MOUSE;tr|Q9CW47|Q9CW47_MOUSE;tr|Q791M3|Q791M3_MOUSE	sp|P16301|LCAT_MOUSE Phosphatidylcholine-sterol acyltransferase OS=Mus musculus GN=Lcat PE=1 SV=2;tr|Q9CW47|Q9CW47_MOUSE Uncharacterized protein (Fragment) OS=Mus musculus GN=Lcat PE=2 SV=1;tr|Q791M3|Q791M3_MOUSE Lecithin-cholesterol acyltransferase Lcat O						15716000
sp|P16546|SPTN1_MOUSE;tr|A3KGU5|A3KGU5_MOUSE;tr|B9EKJ1|B9EKJ1_MOUSE;tr|B2RXX6|B2RXX6_MOUSE;tr|A3KGU7|A3KGU7_MOUSE;tr|E9Q447|E9Q447_MOUSE;tr|A3KGU9|A3KGU9_MOUSE;tr|B7ZWK3|B7ZWK3_MOUSE;tr|Q3URW8|Q3URW8_MOUSE;tr|Q3V1V5|Q3V1V5_MOUSE;tr|Q3TYI8|Q3TYI8_MOUSE;tr|Q6PA04|Q6PA04_MOUSE;tr|Q58ES7|Q58ES7_MOUSE;tr|A3KGU4|A3KGU4_MOUSE	sp|P16546|SPTN1_MOUSE;tr|A3KGU5|A3KGU5_MOUSE;tr|B9EKJ1|B9EKJ1_MOUSE;tr|B2RXX6|B2RXX6_MOUSE;tr|A3KGU7|A3KGU7_MOUSE;tr|E9Q447|E9Q447_MOUSE;tr|A3KGU9|A3KGU9_MOUSE;tr|B7ZWK3|B7ZWK3_MOUSE;tr|Q3URW8|Q3URW8_MOUSE;tr|Q3V1V5|Q3V1V5_MOUSE	sp|P16546|SPTN1_MOUSE Spectrin alpha chain, non-erythrocytic 1 OS=Mus musculus GN=Sptan1 PE=1 SV=4;tr|A3KGU5|A3KGU5_MOUSE Spectrin alpha chain, non-erythrocytic 1 OS=Mus musculus GN=Sptan1 PE=1 SV=1;tr|B9EKJ1|B9EKJ1_MOUSE Spna2 protein OS=Mus musculus GN=S	17543500	33286000			291630000	173840000	97454000	18844000	41355000		34942000
sp|P17563|SBP1_MOUSE;sp|Q63836|SBP2_MOUSE;tr|A0A0R4J135|A0A0R4J135_MOUSE;tr|G3UYY2|G3UYY2_MOUSE;tr|D6RHN2|D6RHN2_MOUSE;tr|G3UWK0|G3UWK0_MOUSE;tr|G3UZT2|G3UZT2_MOUSE	sp|P17563|SBP1_MOUSE;sp|Q63836|SBP2_MOUSE;tr|A0A0R4J135|A0A0R4J135_MOUSE;tr|G3UYY2|G3UYY2_MOUSE	sp|P17563|SBP1_MOUSE Selenium-binding protein 1 OS=Mus musculus GN=Selenbp1 PE=1 SV=2;sp|Q63836|SBP2_MOUSE Selenium-binding protein 2 OS=Mus musculus GN=Selenbp2 PE=1 SV=2;tr|A0A0R4J135|A0A0R4J135_MOUSE Selenium-binding protein 2 OS=Mus musculus GN=Selenbp	284600000	105760000	83263000	42818000	219350000	197250000	210750000	128380000	146980000	166500000	193130000	137010000
sp|P17751|TPIS_MOUSE;tr|H7BXC3|H7BXC3_MOUSE	sp|P17751|TPIS_MOUSE;tr|H7BXC3|H7BXC3_MOUSE	sp|P17751|TPIS_MOUSE Triosephosphate isomerase OS=Mus musculus GN=Tpi1 PE=1 SV=4;tr|H7BXC3|H7BXC3_MOUSE Triosephosphate isomerase OS=Mus musculus GN=Tpi1 PE=1 SV=1	11525500000	6102900000	4537100000	3277900000	7526400000	5578100000	8134700000	4650100000	3942900000	4084000000	6710400000	6321700000
sp|P18419|SVS4_MOUSE	sp|P18419|SVS4_MOUSE	sp|P18419|SVS4_MOUSE Seminal vesicle secretory protein 4 OS=Mus musculus GN=Svs4 PE=1 SV=2					127230000	502520000	76193000
sp|P19157|GSTP1_MOUSE;sp|P46425|GSTP2_MOUSE;tr|K9JA74|K9JA74_MOUSE;tr|K9JA48|K9JA48_MUSSP;tr|Q8VC73|Q8VC73_MOUSE;tr|F6RWR5|F6RWR5_MOUSE	sp|P19157|GSTP1_MOUSE;sp|P46425|GSTP2_MOUSE;tr|K9JA74|K9JA74_MOUSE;tr|K9JA48|K9JA48_MUSSP	sp|P19157|GSTP1_MOUSE Glutathione S-transferase P 1 OS=Mus musculus GN=Gstp1 PE=1 SV=2;sp|P46425|GSTP2_MOUSE Glutathione S-transferase P 2 OS=Mus musculus GN=Gstp2 PE=1 SV=2;tr|K9JA74|K9JA74_MOUSE Glutathione S-transferase pi 2 (Fragment) OS=Mus musculus G	338680000	331030000	182940000	213620000	415240000	316020000	457710000	243440000	282060000	235700000	322280000	316530000
sp|P19536|COX5B_MOUSE;tr|Q9D881|Q9D881_MOUSE;tr|F7C106|F7C106_MOUSE;tr|A0A0A6YVR0|A0A0A6YVR0_MOUSE	sp|P19536|COX5B_MOUSE;tr|Q9D881|Q9D881_MOUSE;tr|F7C106|F7C106_MOUSE;tr|A0A0A6YVR0|A0A0A6YVR0_MOUSE	sp|P19536|COX5B_MOUSE Cytochrome c oxidase subunit 5B, mitochondrial OS=Mus musculus GN=Cox5b PE=1 SV=1;tr|Q9D881|Q9D881_MOUSE Cytochrome c oxidase subunit 5B, mitochondrial OS=Mus musculus GN=Cox5b PE=1 SV=1;tr|F7C106|F7C106_MOUSE Cytochrome c oxidase sub						49928000
sp|P20801|TNNC2_MOUSE;tr|Q3UZY7|Q3UZY7_MOUSE	sp|P20801|TNNC2_MOUSE;tr|Q3UZY7|Q3UZY7_MOUSE	sp|P20801|TNNC2_MOUSE Troponin C, skeletal muscle OS=Mus musculus GN=Tnnc2 PE=1 SV=2;tr|Q3UZY7|Q3UZY7_MOUSE Uncharacterized protein OS=Mus musculus GN=Tnnc2 PE=2 SV=1			45589000	26521000	43767000	47205000	47136000	30351000			36984000	30449000
sp|P21550|ENOB_MOUSE;tr|Q4FK59|Q4FK59_MOUSE;tr|Q5SX59|Q5SX59_MOUSE;tr|J3QPZ9|J3QPZ9_MOUSE;tr|Q5SX60|Q5SX60_MOUSE;tr|Q5SX61|Q5SX61_MOUSE	sp|P21550|ENOB_MOUSE;tr|Q4FK59|Q4FK59_MOUSE;tr|Q5SX59|Q5SX59_MOUSE	sp|P21550|ENOB_MOUSE Beta-enolase OS=Mus musculus GN=Eno3 PE=1 SV=3;tr|Q4FK59|Q4FK59_MOUSE Eno3 protein OS=Mus musculus GN=Eno3 PE=2 SV=1;tr|Q5SX59|Q5SX59_MOUSE Beta-enolase (Fragment) OS=Mus musculus GN=Eno3 PE=1 SV=1	14554000000	4991700000	4359100000	3355500000	7329100000	4106400000	7362500000	3848900000	2804700000	3600900000	6845800000	5953900000
sp|P21614|VTDB_MOUSE;tr|A0A0G2JGM6|A0A0G2JGM6_MOUSE	sp|P21614|VTDB_MOUSE	sp|P21614|VTDB_MOUSE Vitamin D-binding protein OS=Mus musculus GN=Gc PE=1 SV=2	6895900000	11758000000	9384000000	10693000000	6795500000	6151100000	9619600000	10400000000	10514000000	9341700000	8906200000	11519000000
sp|P21956|MFGM_MOUSE;tr|Q3TDU5|Q3TDU5_MOUSE;tr|Q9QWQ1|Q9QWQ1_MOUSE	sp|P21956|MFGM_MOUSE;tr|Q3TDU5|Q3TDU5_MOUSE	sp|P21956|MFGM_MOUSE Lactadherin OS=Mus musculus GN=Mfge8 PE=1 SV=3;tr|Q3TDU5|Q3TDU5_MOUSE Milk fat globule-EGF factor 8 protein, isoform CRA_a OS=Mus musculus GN=Mfge8 PE=2 SV=1		27989000		27586000					21698000			24227000
sp|P22005|PENK_MOUSE;tr|Q3UXY8|Q3UXY8_MOUSE;tr|B1AZQ0|B1AZQ0_MOUSE	sp|P22005|PENK_MOUSE;tr|Q3UXY8|Q3UXY8_MOUSE;tr|B1AZQ0|B1AZQ0_MOUSE	sp|P22005|PENK_MOUSE Proenkephalin-A OS=Mus musculus GN=Penk PE=1 SV=2;tr|Q3UXY8|Q3UXY8_MOUSE Uncharacterized protein (Fragment) OS=Mus musculus GN=Penk PE=2 SV=1;tr|B1AZQ0|B1AZQ0_MOUSE Proenkephalin-A (Fragment) OS=Mus musculus GN=Penk PE=1 SV=1	658830000	845190000	1209200000	1361100000	733230000	944730000	899540000	806750000	951330000	673010000	785030000	871140000
sp|P23953|EST1C_MOUSE;tr|A0A1D5RM42|A0A1D5RM42_MOUSE;sp|Q91WU0|CES1F_MOUSE;tr|H3BL34|H3BL34_MOUSE;tr|Q3UN14|Q3UN14_MOUSE;tr|D3Z298|D3Z298_MOUSE;sp|Q64176|EST1E_MOUSE;tr|Q5FWH4|Q5FWH4_MOUSE;tr|E9PYP1|E9PYP1_MOUSE	sp|P23953|EST1C_MOUSE	sp|P23953|EST1C_MOUSE Carboxylesterase 1C OS=Mus musculus GN=Ces1c PE=1 SV=4	6282500000	6392000000	6025500000	6577200000	5348900000	5305100000	6198200000	7116800000	5002500000	6771700000	6869600000	6393200000
sp|P24472|GSTA4_MOUSE;tr|A0A1L1SS61|A0A1L1SS61_MOUSE	sp|P24472|GSTA4_MOUSE	sp|P24472|GSTA4_MOUSE Glutathione S-transferase A4 OS=Mus musculus GN=Gsta4 PE=1 SV=3							25912000
sp|P24527|LKHA4_MOUSE	sp|P24527|LKHA4_MOUSE	sp|P24527|LKHA4_MOUSE Leukotriene A-4 hydrolase OS=Mus musculus GN=Lta4h PE=1 SV=4					9080800
sp|P24549|AL1A1_MOUSE;tr|A0A286YDG6|A0A286YDG6_MOUSE;tr|A0A286YCZ0|A0A286YCZ0_MOUSE;tr|B2RTL5|B2RTL5_MOUSE;sp|O35945|AL1A7_MOUSE;tr|G3UWP3|G3UWP3_MOUSE;tr|Q3UIA4|Q3UIA4_MOUSE;sp|Q9JHW9|AL1A3_MOUSE	sp|P24549|AL1A1_MOUSE	sp|P24549|AL1A1_MOUSE Retinal dehydrogenase 1 OS=Mus musculus GN=Aldh1a1 PE=1 SV=5	265235000	116830000		26681000	227390000	359620000	188510000	293740000	358820000	482280000	459730000	337180000
sp|P26041|MOES_MOUSE;tr|Q3TZQ2|Q3TZQ2_MOUSE;tr|Q05DU4|Q05DU4_MOUSE;tr|Q8C2N4|Q8C2N4_MOUSE;tr|Q7TSG6|Q7TSG6_MOUSE;tr|Q05CE6|Q05CE6_MOUSE;tr|Q3UF33|Q3UF33_MOUSE;tr|Q8CBU4|Q8CBU4_MOUSE	sp|P26041|MOES_MOUSE;tr|Q3TZQ2|Q3TZQ2_MOUSE;tr|Q05DU4|Q05DU4_MOUSE	sp|P26041|MOES_MOUSE Moesin OS=Mus musculus GN=Msn PE=1 SV=3;tr|Q3TZQ2|Q3TZQ2_MOUSE Uncharacterized protein OS=Mus musculus GN=Msn PE=2 SV=1;tr|Q05DU4|Q05DU4_MOUSE Msn protein (Fragment) OS=Mus musculus GN=Msn PE=2 SV=1	50264000	57841000	35326000		127970000	70681000	103530000	49873000	37815000	42988000	57221000
sp|P26043|RADI_MOUSE;tr|Q3TH46|Q3TH46_MOUSE;tr|Q3U111|Q3U111_MOUSE;tr|Q3UJJ8|Q3UJJ8_MOUSE;tr|Q3TS74|Q3TS74_MOUSE	sp|P26043|RADI_MOUSE;tr|Q3TH46|Q3TH46_MOUSE;tr|Q3U111|Q3U111_MOUSE;tr|Q3UJJ8|Q3UJJ8_MOUSE	sp|P26043|RADI_MOUSE Radixin OS=Mus musculus GN=Rdx PE=1 SV=3;tr|Q3TH46|Q3TH46_MOUSE Uncharacterized protein (Fragment) OS=Mus musculus GN=Rdx PE=2 SV=1;tr|Q3U111|Q3U111_MOUSE Uncharacterized protein (Fragment) OS=Mus musculus GN=Rdx PE=2 SV=1;tr|Q3UJJ8|Q3	15446000										15306000
sp|P26339|CMGA_MOUSE;tr|Q3UN28|Q3UN28_MOUSE	sp|P26339|CMGA_MOUSE;tr|Q3UN28|Q3UN28_MOUSE	sp|P26339|CMGA_MOUSE Chromogranin-A OS=Mus musculus GN=Chga PE=1 SV=1;tr|Q3UN28|Q3UN28_MOUSE Uncharacterized protein OS=Mus musculus GN=Chga PE=2 SV=1	1882350000	4060400000	4758600000	5879200000	1758500000	2960300000	2148400000	2455100000	3189700000	1732300000	1623000000	1859600000
sp|P26443|DHE3_MOUSE;tr|Q3TSQ7|Q3TSQ7_MOUSE;tr|F7CFA5|F7CFA5_MOUSE	sp|P26443|DHE3_MOUSE	sp|P26443|DHE3_MOUSE Glutamate dehydrogenase 1, mitochondrial OS=Mus musculus GN=Glud1 PE=1 SV=1					65978000	78187000					68993000
sp|P27546|MAP4_MOUSE;tr|A0A0G2JG35|A0A0G2JG35_MOUSE;tr|A0A140T8T5|A0A140T8T5_MOUSE;tr|E9PZ43|E9PZ43_MOUSE;tr|A0A0G2JFT4|A0A0G2JFT4_MOUSE;tr|A0A0G2JDN7|A0A0G2JDN7_MOUSE;tr|A0A0G2JFK3|A0A0G2JFK3_MOUSE;tr|A0A0G2JDY5|A0A0G2JDY5_MOUSE;tr|A0A0G2JFH2|A0A0G2JFH2_MOUSE;tr|A0A0G2JE57|A0A0G2JE57_MOUSE;tr|A0A0G2JDU1|A0A0G2JDU1_MOUSE	sp|P27546|MAP4_MOUSE;tr|A0A0G2JG35|A0A0G2JG35_MOUSE;tr|A0A140T8T5|A0A140T8T5_MOUSE;tr|E9PZ43|E9PZ43_MOUSE;tr|A0A0G2JFT4|A0A0G2JFT4_MOUSE;tr|A0A0G2JDN7|A0A0G2JDN7_MOUSE	sp|P27546|MAP4_MOUSE Microtubule-associated protein 4 OS=Mus musculus GN=Map4 PE=1 SV=3;tr|A0A0G2JG35|A0A0G2JG35_MOUSE Microtubule-associated protein (Fragment) OS=Mus musculus GN=Map4 PE=1 SV=1;tr|A0A140T8T5|A0A140T8T5_MOUSE Microtubule-associated protein					32701000		22198000
sp|P27773|PDIA3_MOUSE;tr|F6Q404|F6Q404_MOUSE	sp|P27773|PDIA3_MOUSE	sp|P27773|PDIA3_MOUSE Protein disulfide-isomerase A3 OS=Mus musculus GN=Pdia3 PE=1 SV=2	147835000	157650000	118190000	68582000	350250000	245680000	265780000	174170000	204680000	107510000	190860000	128600000
sp|P28665|MUG1_MOUSE;sp|P28666|MUG2_MOUSE;tr|A0A0N4SVU1|A0A0N4SVU1_MOUSE;tr|V9GZF6|V9GZF6_MOUSE	sp|P28665|MUG1_MOUSE	sp|P28665|MUG1_MOUSE Murinoglobulin-1 OS=Mus musculus GN=Mug1 PE=1 SV=3	2359250000	2791700000	1889800000	2308200000	1049400000	1757600000	2729000000	3231400000	2878600000	4938600000	4493900000	3659600000
sp|P29788|VTNC_MOUSE;sp|Q8BP99|CA216_MOUSE	sp|P29788|VTNC_MOUSE	sp|P29788|VTNC_MOUSE Vitronectin OS=Mus musculus GN=Vtn PE=1 SV=2	745700000	1258300000	1138400000	1781000000	622130000	1074200000	786040000	857890000	937490000	654040000	528700000	636640000
sp|P31532|SAA4_MOUSE	sp|P31532|SAA4_MOUSE	sp|P31532|SAA4_MOUSE Serum amyloid A-4 protein OS=Mus musculus GN=Saa4 PE=1 SV=2										28879000	31509000
sp|P32648|VIP_MOUSE;tr|A0A0R4J003|A0A0R4J003_MOUSE	sp|P32648|VIP_MOUSE;tr|A0A0R4J003|A0A0R4J003_MOUSE	sp|P32648|VIP_MOUSE VIP peptides OS=Mus musculus GN=Vip PE=1 SV=1;tr|A0A0R4J003|A0A0R4J003_MOUSE VIP peptides OS=Mus musculus GN=Vip PE=3 SV=1				39664000		30984000	20340000	18553000	26893000		26695000	34058000
sp|P34928|APOC1_MOUSE	sp|P34928|APOC1_MOUSE	sp|P34928|APOC1_MOUSE Apolipoprotein C-I OS=Mus musculus GN=Apoc1 PE=1 SV=1					57266000		50215000			54888000	43600000	39802000
sp|P35700|PRDX1_MOUSE;tr|B1AXW5|B1AXW5_MOUSE;tr|B1AXW6|B1AXW6_MOUSE;tr|Q3U9J9|Q3U9J9_MOUSE;tr|B1AXW4|B1AXW4_MOUSE	sp|P35700|PRDX1_MOUSE;tr|B1AXW5|B1AXW5_MOUSE;tr|B1AXW6|B1AXW6_MOUSE;tr|Q3U9J9|Q3U9J9_MOUSE;tr|B1AXW4|B1AXW4_MOUSE	sp|P35700|PRDX1_MOUSE Peroxiredoxin-1 OS=Mus musculus GN=Prdx1 PE=1 SV=1;tr|B1AXW5|B1AXW5_MOUSE Peroxiredoxin-1 (Fragment) OS=Mus musculus GN=Prdx1 PE=1 SV=8;tr|B1AXW6|B1AXW6_MOUSE Peroxiredoxin-1 (Fragment) OS=Mus musculus GN=Prdx1 PE=1 SV=1;tr|Q3U9J9|Q3U	641275000	202070000	66230000	107020000	424130000	485110000	493380000	146740000	142160000	320950000	429420000	323030000
sp|P38647|GRP75_MOUSE	sp|P38647|GRP75_MOUSE	sp|P38647|GRP75_MOUSE Stress-70 protein, mitochondrial OS=Mus musculus GN=Hspa9 PE=1 SV=3					17383000	18463000
sp|P39039|MBL1_MOUSE	sp|P39039|MBL1_MOUSE	sp|P39039|MBL1_MOUSE Mannose-binding protein A OS=Mus musculus GN=Mbl1 PE=1 SV=1								10945000
sp|P40142|TKT_MOUSE;tr|A0A286YE28|A0A286YE28_MOUSE;tr|Q9Z2L5|Q9Z2L5_MOUSE;tr|O55021|O55021_MOUSE	sp|P40142|TKT_MOUSE;tr|A0A286YE28|A0A286YE28_MOUSE	sp|P40142|TKT_MOUSE Transketolase OS=Mus musculus GN=Tkt PE=1 SV=1;tr|A0A286YE28|A0A286YE28_MOUSE Transketolase (Fragment) OS=Mus musculus GN=Tkt PE=4 SV=1	324895000	97631000	127220000	75162000	261320000	178810000	242920000	164980000	137720000	212990000	230420000	172970000
sp|P40936|INMT_MOUSE	sp|P40936|INMT_MOUSE	sp|P40936|INMT_MOUSE Indolethylamine N-methyltransferase OS=Mus musculus GN=Inmt PE=1 SV=1					14578000
sp|P43274|H14_MOUSE	sp|P43274|H14_MOUSE	sp|P43274|H14_MOUSE Histone H1.4 OS=Mus musculus GN=Hist1h1e PE=1 SV=2		68119000			104630000	98677000	68440000		58799000
sp|P46412|GPX3_MOUSE;tr|A0A1C7ZMZ5|A0A1C7ZMZ5_MOUSE;tr|A0A1C7ZMZ7|A0A1C7ZMZ7_MOUSE;tr|Q8CC60|Q8CC60_MOUSE;tr|Q8CDQ5|Q8CDQ5_MOUSE;sp|P21765|GPX5_MOUSE	sp|P46412|GPX3_MOUSE;tr|A0A1C7ZMZ5|A0A1C7ZMZ5_MOUSE;tr|A0A1C7ZMZ7|A0A1C7ZMZ7_MOUSE	sp|P46412|GPX3_MOUSE Glutathione peroxidase 3 OS=Mus musculus GN=Gpx3 PE=1 SV=2;tr|A0A1C7ZMZ5|A0A1C7ZMZ5_MOUSE Glutathione peroxidase (Fragment) OS=Mus musculus GN=Gpx3 PE=1 SV=1;tr|A0A1C7ZMZ7|A0A1C7ZMZ7_MOUSE Glutathione peroxidase 3 (Fragment) OS=Mus mus	239715000	265210000	178950000	177320000	274840000	256090000	309920000	289500000	198540000	292220000	237170000	322600000
sp|P47857|PFKAM_MOUSE;tr|Q99K08|Q99K08_MOUSE;tr|Q1LZL7|Q1LZL7_MOUSE;sp|P12382|PFKAL_MOUSE;tr|O35514|O35514_MOUSE;tr|Q8C605|Q8C605_MOUSE;sp|Q9WUA3|PFKAP_MOUSE;tr|Q9D255|Q9D255_MOUSE;tr|Q8CD98|Q8CD98_MOUSE	sp|P47857|PFKAM_MOUSE;tr|Q99K08|Q99K08_MOUSE	sp|P47857|PFKAM_MOUSE ATP-dependent 6-phosphofructokinase, muscle type OS=Mus musculus GN=Pfkm PE=1 SV=3;tr|Q99K08|Q99K08_MOUSE ATP-dependent 6-phosphofructokinase OS=Mus musculus GN=Pfkm PE=2 SV=1	347030000	213760000	119730000	90859000	174340000	349780000	205930000	51786000	73572000	78657000	274050000	150650000
sp|P47867|SCG3_MOUSE;tr|A0A1L1SV66|A0A1L1SV66_MOUSE	sp|P47867|SCG3_MOUSE	sp|P47867|SCG3_MOUSE Secretogranin-3 OS=Mus musculus GN=Scg3 PE=1 SV=1	1331650000	2169100000	2236000000	2854900000	1071000000	1777300000	1461200000	1326400000	2252300000	1159300000	1139700000	1250900000
sp|P47877|IBP2_MOUSE;tr|Q9D057|Q9D057_MOUSE;tr|D3YU40|D3YU40_MOUSE	sp|P47877|IBP2_MOUSE;tr|Q9D057|Q9D057_MOUSE	sp|P47877|IBP2_MOUSE Insulin-like growth factor-binding protein 2 OS=Mus musculus GN=Igfbp2 PE=2 SV=2;tr|Q9D057|Q9D057_MOUSE Uncharacterized protein OS=Mus musculus GN=Igfbp2 PE=2 SV=1	1399400000	2655900000	2529700000	2960900000	1167500000	2457200000	1761700000	1575400000	2210200000	1181000000	1134800000	1576900000
sp|P47878|IBP3_MOUSE;tr|Q3UR87|Q3UR87_MOUSE;tr|Q8BP94|Q8BP94_MOUSE	sp|P47878|IBP3_MOUSE;tr|Q3UR87|Q3UR87_MOUSE	sp|P47878|IBP3_MOUSE Insulin-like growth factor-binding protein 3 OS=Mus musculus GN=Igfbp3 PE=2 SV=2;tr|Q3UR87|Q3UR87_MOUSE Uncharacterized protein (Fragment) OS=Mus musculus GN=Igfbp3 PE=2 SV=1		57260000	70679000	153740000		101510000	84950000	89378000	85485000			45561000
sp|P47879|IBP4_MOUSE;tr|H3BLB7|H3BLB7_MOUSE;tr|Q8BSM9|Q8BSM9_MOUSE;tr|H3BJT2|H3BJT2_MOUSE	sp|P47879|IBP4_MOUSE;tr|H3BLB7|H3BLB7_MOUSE;tr|Q8BSM9|Q8BSM9_MOUSE;tr|H3BJT2|H3BJT2_MOUSE	sp|P47879|IBP4_MOUSE Insulin-like growth factor-binding protein 4 OS=Mus musculus GN=Igfbp4 PE=1 SV=2;tr|H3BLB7|H3BLB7_MOUSE Insulin-like growth factor-binding protein 4 OS=Mus musculus GN=Igfbp4 PE=1 SV=1;tr|Q8BSM9|Q8BSM9_MOUSE Uncharacterized protein OS=	92189000	157020000	155590000	151920000	80570000	131100000	114220000	89175000	135270000	69841000	76295000	78802000
sp|P47880|IBP6_MOUSE	sp|P47880|IBP6_MOUSE	sp|P47880|IBP6_MOUSE Insulin-like growth factor-binding protein 6 OS=Mus musculus GN=Igfbp6 PE=2 SV=2	115070000	255720000	258600000	297940000	88703000	214340000	162000000	139910000	193460000	84358000	74204000
sp|P47963|RL13_MOUSE;tr|Q5RKP3|Q5RKP3_MOUSE	sp|P47963|RL13_MOUSE;tr|Q5RKP3|Q5RKP3_MOUSE	sp|P47963|RL13_MOUSE 60S ribosomal protein L13 OS=Mus musculus GN=Rpl13 PE=1 SV=3;tr|Q5RKP3|Q5RKP3_MOUSE 60S ribosomal protein L13 OS=Mus musculus GN=Rpl13 PE=2 SV=1					30337000	38379000	22015000		21194000
sp|P48036|ANXA5_MOUSE;tr|A0A0G2JGQ0|A0A0G2JGQ0_MOUSE	sp|P48036|ANXA5_MOUSE	sp|P48036|ANXA5_MOUSE Annexin A5 OS=Mus musculus GN=Anxa5 PE=1 SV=1	189085000	364730000	223550000	146970000	796820000	729950000	436750000	431590000	333390000	170590000	399780000	150030000
sp|P48678|LMNA_MOUSE;tr|D3YUF7|D3YUF7_MOUSE;tr|Q9CTL2|Q9CTL2_MOUSE;tr|Q8BNX5|Q8BNX5_MOUSE;tr|Q8C553|Q8C553_MOUSE;tr|Q3V159|Q3V159_MOUSE;sp|P14733|LMNB1_MOUSE;sp|P21619|LMNB2_MOUSE;tr|A0A0R4J0Q5|A0A0R4J0Q5_MOUSE	sp|P48678|LMNA_MOUSE	sp|P48678|LMNA_MOUSE Prelamin-A/C OS=Mus musculus GN=Lmna PE=1 SV=2	41365000	611890000	55431000	126430000	1425500000	768800000	863660000	524660000	88725000		37599000	182630000
sp|P48962|ADT1_MOUSE;tr|Q8BVI9|Q8BVI9_MOUSE;tr|B2RTC8|B2RTC8_MOUSE;sp|Q3V132|ADT4_MOUSE	sp|P48962|ADT1_MOUSE;tr|Q8BVI9|Q8BVI9_MOUSE	sp|P48962|ADT1_MOUSE ADP/ATP translocase 1 OS=Mus musculus GN=Slc25a4 PE=1 SV=4;tr|Q8BVI9|Q8BVI9_MOUSE Uncharacterized protein OS=Mus musculus GN=Slc25a4 PE=2 SV=1	160480000	82181000		28699000	727200000	977350000	352820000	125930000	161440000	101290000	186600000
sp|P49722|PSA2_MOUSE;tr|Q3UWT6|Q3UWT6_MOUSE;tr|Q8BKE0|Q8BKE0_MOUSE;tr|Q9CZ58|Q9CZ58_MOUSE	sp|P49722|PSA2_MOUSE;tr|Q3UWT6|Q3UWT6_MOUSE;tr|Q8BKE0|Q8BKE0_MOUSE;tr|Q9CZ58|Q9CZ58_MOUSE	sp|P49722|PSA2_MOUSE Proteasome subunit alpha type-2 OS=Mus musculus GN=Psma2 PE=1 SV=3;tr|Q3UWT6|Q3UWT6_MOUSE Proteasome subunit alpha type OS=Mus musculus GN=Psma2 PE=2 SV=1;tr|Q8BKE0|Q8BKE0_MOUSE Proteasome endopeptidase complex (Fragment) OS=Mus muscul					15159000	10132000	13678000			14374000	13756000
sp|P50396|GDIA_MOUSE;tr|D6RI86|D6RI86_MOUSE;tr|B7FAU8|B7FAU8_MOUSE	sp|P50396|GDIA_MOUSE	sp|P50396|GDIA_MOUSE Rab GDP dissociation inhibitor alpha OS=Mus musculus GN=Gdi1 PE=1 SV=3	44285000	34204000			55533000	39073000	51408000	39894000	48453000	60041000	66004000	56500000
sp|P50543|S10AB_MOUSE	sp|P50543|S10AB_MOUSE	sp|P50543|S10AB_MOUSE Protein S100-A11 OS=Mus musculus GN=S100a11 PE=1 SV=1	12596000				26127000		21323000				12657000
sp|P50544|ACADV_MOUSE;tr|B1AR28|B1AR28_MOUSE	sp|P50544|ACADV_MOUSE;tr|B1AR28|B1AR28_MOUSE	sp|P50544|ACADV_MOUSE Very long-chain specific acyl-CoA dehydrogenase, mitochondrial OS=Mus musculus GN=Acadvl PE=1 SV=3;tr|B1AR28|B1AR28_MOUSE Very long-chain-specific acyl-CoA dehydrogenase, mitochondrial OS=Mus musculus GN=Acadvl PE=1 SV=1						48544000
sp|P51885|LUM_MOUSE;CON__Q05443	sp|P51885|LUM_MOUSE	sp|P51885|LUM_MOUSE Lumican OS=Mus musculus GN=Lum PE=1 SV=2	1612950000	2058700000	1205400000	1177500000	3849400000	2286500000	3060800000	2434100000	1410100000	1119300000	1527100000	1368700000
sp|P51910|APOD_MOUSE	sp|P51910|APOD_MOUSE	sp|P51910|APOD_MOUSE Apolipoprotein D OS=Mus musculus GN=Apod PE=1 SV=1	1863750000	2503700000	2410000000	3360900000	1221100000	2855000000	1295100000	1601600000	2345600000	1294000000	1477600000	1549300000
sp|P52430|PON1_MOUSE;tr|H3BK03|H3BK03_MOUSE;tr|H3BLB8|H3BLB8_MOUSE	sp|P52430|PON1_MOUSE;tr|H3BK03|H3BK03_MOUSE	sp|P52430|PON1_MOUSE Serum paraoxonase/arylesterase 1 OS=Mus musculus GN=Pon1 PE=1 SV=2;tr|H3BK03|H3BK03_MOUSE Serum paraoxonase/arylesterase 1 (Fragment) OS=Mus musculus GN=Pon1 PE=1 SV=8	80348000	85222000	92393000		75028000	95251000	98047000	160390000	112450000	202040000	157690000	160010000
sp|P52480|KPYM_MOUSE;tr|A0A1L1SU37|A0A1L1SU37_MOUSE;tr|A0A1L1SQV8|A0A1L1SQV8_MOUSE;tr|A0A1L1SSN6|A0A1L1SSN6_MOUSE;tr|A0A1L1STV8|A0A1L1STV8_MOUSE;tr|A0A1L1SUV0|A0A1L1SUV0_MOUSE;tr|A0A1L1ST52|A0A1L1ST52_MOUSE;tr|A0A1L1SVH2|A0A1L1SVH2_MOUSE	sp|P52480|KPYM_MOUSE;tr|A0A1L1SU37|A0A1L1SU37_MOUSE	sp|P52480|KPYM_MOUSE Pyruvate kinase PKM OS=Mus musculus GN=Pkm PE=1 SV=4;tr|A0A1L1SU37|A0A1L1SU37_MOUSE Pyruvate kinase PKM (Fragment) OS=Mus musculus GN=Pkm PE=1 SV=1	5778900000	4238000000	2796300000	2606400000	4062800000	3945600000	4435500000	2476400000	2518800000	2407800000	4538600000	3731500000
sp|P52503|NDUS6_MOUSE;tr|A0A1Y7VM38|A0A1Y7VM38_MOUSE;tr|A0A1Y7VKP8|A0A1Y7VKP8_MOUSE	sp|P52503|NDUS6_MOUSE;tr|A0A1Y7VM38|A0A1Y7VM38_MOUSE;tr|A0A1Y7VKP8|A0A1Y7VKP8_MOUSE	sp|P52503|NDUS6_MOUSE NADH dehydrogenase [ubiquinone] iron-sulfur protein 6, mitochondrial OS=Mus musculus GN=Ndufs6 PE=1 SV=2;tr|A0A1Y7VM38|A0A1Y7VM38_MOUSE NADH dehydrogenase [ubiquinone] iron-sulfur protein 6, mitochondrial OS=Mus musculus GN=Ndufs6 PE=							28173000
sp|P54071|IDHP_MOUSE;tr|D6RIL6|D6RIL6_MOUSE;tr|A0A0U1RP68|A0A0U1RP68_MOUSE;tr|A0A0U1RPR1|A0A0U1RPR1_MOUSE	sp|P54071|IDHP_MOUSE;tr|D6RIL6|D6RIL6_MOUSE	sp|P54071|IDHP_MOUSE Isocitrate dehydrogenase [NADP], mitochondrial OS=Mus musculus GN=Idh2 PE=1 SV=3;tr|D6RIL6|D6RIL6_MOUSE Isocitrate dehydrogenase [NADP], mitochondrial OS=Mus musculus GN=Idh2 PE=1 SV=1	261795000	178610000	111620000	88973000	387200000	382700000	273240000	138920000	136960000	93244000	157930000	89522000
sp|P56135|ATPK_MOUSE;tr|F8WHP8|F8WHP8_MOUSE	sp|P56135|ATPK_MOUSE;tr|F8WHP8|F8WHP8_MOUSE	sp|P56135|ATPK_MOUSE ATP synthase subunit f, mitochondrial OS=Mus musculus GN=Atp5j2 PE=1 SV=3;tr|F8WHP8|F8WHP8_MOUSE ATP synthase subunit f, mitochondrial OS=Mus musculus GN=Atp5j2 PE=1 SV=1					35901000
sp|P56375|ACYP2_MOUSE	sp|P56375|ACYP2_MOUSE	sp|P56375|ACYP2_MOUSE Acylphosphatase-2 OS=Mus musculus GN=Acyp2 PE=1 SV=2	57819000						41431000
sp|P56376|ACYP1_MOUSE;tr|Q4VAF0|Q4VAF0_MOUSE;tr|E9QJT5|E9QJT5_MOUSE;tr|Q8BMV3|Q8BMV3_MOUSE	sp|P56376|ACYP1_MOUSE;tr|Q4VAF0|Q4VAF0_MOUSE;tr|E9QJT5|E9QJT5_MOUSE	sp|P56376|ACYP1_MOUSE Acylphosphatase-1 OS=Mus musculus GN=Acyp1 PE=1 SV=2;tr|Q4VAF0|Q4VAF0_MOUSE Acylphosphatase (Fragment) OS=Mus musculus GN=Acyp1 PE=2 SV=1;tr|E9QJT5|E9QJT5_MOUSE Acylphosphatase OS=Mus musculus GN=Acyp1 PE=1 SV=1	47012500		22673000	24601000	28233000	23919000	28929000	24418000	21418000	35967000	31396000	35326000
sp|P56391|CX6B1_MOUSE;tr|A0A140LIU3|A0A140LIU3_MOUSE	sp|P56391|CX6B1_MOUSE	sp|P56391|CX6B1_MOUSE Cytochrome c oxidase subunit 6B1 OS=Mus musculus GN=Cox6b1 PE=1 SV=2						56731000
sp|P56480|ATPB_MOUSE	sp|P56480|ATPB_MOUSE	sp|P56480|ATPB_MOUSE ATP synthase subunit beta, mitochondrial OS=Mus musculus GN=Atp5b PE=1 SV=2	482350000	245400000	171930000	146910000	1068300000	1324700000	787720000	374940000	397470000	295700000	503830000	211610000
sp|P60335|PCBP1_MOUSE;tr|E9Q7D8|E9Q7D8_MOUSE;tr|Q8CFQ6|Q8CFQ6_MOUSE;tr|Q3TF69|Q3TF69_MOUSE;tr|Q3TT81|Q3TT81_MOUSE;tr|B2M1R7|B2M1R7_MOUSE;sp|Q61990|PCBP2_MOUSE;sp|P57722|PCBP3_MOUSE	sp|P60335|PCBP1_MOUSE	sp|P60335|PCBP1_MOUSE Poly(rC)-binding protein 1 OS=Mus musculus GN=Pcbp1 PE=1 SV=1							12105000
sp|P60766|CDC42_MOUSE;tr|Q3UL78|Q3UL78_MOUSE;tr|A0A1B0GSL4|A0A1B0GSL4_MOUSE;tr|Q8CEV8|Q8CEV8_MOUSE;tr|G3UZM2|G3UZM2_MOUSE;tr|B2KKU6|B2KKU6_MOUSE;tr|D3Z3L1|D3Z3L1_MOUSE;tr|F2Z463|F2Z463_MOUSE;tr|D3YX61|D3YX61_MOUSE;tr|Q3UDZ1|Q3UDZ1_MOUSE;sp|P84096|RHOG_MOUSE;tr|Q7TMY0|Q7TMY0_MOUSE;sp|Q8R527|RHOQ_MOUSE;tr|Q3TZU6|Q3TZU6_MOUSE;sp|Q9ER71|RHOJ_MOUSE	sp|P60766|CDC42_MOUSE;tr|Q3UL78|Q3UL78_MOUSE	sp|P60766|CDC42_MOUSE Cell division control protein 42 homolog OS=Mus musculus GN=Cdc42 PE=1 SV=2;tr|Q3UL78|Q3UL78_MOUSE Uncharacterized protein OS=Mus musculus GN=Cdc42 PE=2 SV=1					41181000	27640000	26074000	22128000
sp|P61971|NTF2_MOUSE;tr|Q3U8H8|Q3U8H8_MOUSE;tr|A0A1D5RLR1|A0A1D5RLR1_MOUSE	sp|P61971|NTF2_MOUSE;tr|Q3U8H8|Q3U8H8_MOUSE	sp|P61971|NTF2_MOUSE Nuclear transport factor 2 OS=Mus musculus GN=Nutf2 PE=1 SV=1;tr|Q3U8H8|Q3U8H8_MOUSE Uncharacterized protein OS=Mus musculus PE=2 SV=1	58826000	36118000			55912000		47978000		43405000		44993000	63968000
sp|P62141|PP1B_MOUSE;tr|A0A0G2JFF1|A0A0G2JFF1_MOUSE;tr|Q6ZWM8|Q6ZWM8_MOUSE;tr|Q3U7K1|Q3U7K1_MOUSE;sp|P63087|PP1G_MOUSE;tr|A0A0G2JGC1|A0A0G2JGC1_MOUSE;tr|Q3TYF5|Q3TYF5_MOUSE;tr|Q3U8W0|Q3U8W0_MOUSE;sp|P62137|PP1A_MOUSE;tr|A0A0J9YUG2|A0A0J9YUG2_MOUSE;tr|A0A0J9YUU8|A0A0J9YUU8_MOUSE	sp|P62141|PP1B_MOUSE;tr|A0A0G2JFF1|A0A0G2JFF1_MOUSE;tr|Q6ZWM8|Q6ZWM8_MOUSE;tr|Q3U7K1|Q3U7K1_MOUSE;sp|P63087|PP1G_MOUSE;tr|A0A0G2JGC1|A0A0G2JGC1_MOUSE;tr|Q3TYF5|Q3TYF5_MOUSE;tr|Q3U8W0|Q3U8W0_MOUSE;sp|P62137|PP1A_MOUSE	sp|P62141|PP1B_MOUSE Serine/threonine-protein phosphatase PP1-beta catalytic subunit OS=Mus musculus GN=Ppp1cb PE=1 SV=3;tr|A0A0G2JFF1|A0A0G2JFF1_MOUSE Serine/threonine-protein phosphatase (Fragment) OS=Mus musculus GN=Ppp1cc PE=1 SV=1;tr|Q6ZWM8|Q6ZWM8_MOU							10111000
sp|P62631|EF1A2_MOUSE	sp|P62631|EF1A2_MOUSE	sp|P62631|EF1A2_MOUSE Elongation factor 1-alpha 2 OS=Mus musculus GN=Eef1a2 PE=1 SV=1	588920000	335810000		208090000	510890000	517490000	538370000	190960000	303450000	266180000	513840000	359570000
sp|P62774|MTPN_MOUSE;tr|A0A0J9YV46|A0A0J9YV46_MOUSE	sp|P62774|MTPN_MOUSE	sp|P62774|MTPN_MOUSE Myotrophin OS=Mus musculus GN=Mtpn PE=1 SV=2	41161000				37425000		30589000			32275000	25326000	23540000
sp|P63028|TCTP_MOUSE;tr|D3YU75|D3YU75_MOUSE	sp|P63028|TCTP_MOUSE;tr|D3YU75|D3YU75_MOUSE	sp|P63028|TCTP_MOUSE Translationally-controlled tumor protein OS=Mus musculus GN=Tpt1 PE=1 SV=1;tr|D3YU75|D3YU75_MOUSE Translationally-controlled tumor protein OS=Mus musculus GN=Tpt1 PE=1 SV=1	88172000	64061000	44762000	43141000	111880000	66561000	100670000	66056000	48969000	69116000	91024000	109480000
sp|P63038|CH60_MOUSE;tr|D3Z7J9|D3Z7J9_MOUSE;tr|D3Z2F2|D3Z2F2_MOUSE	sp|P63038|CH60_MOUSE	sp|P63038|CH60_MOUSE 60 kDa heat shock protein, mitochondrial OS=Mus musculus GN=Hspd1 PE=1 SV=1					47952000	63894000					50137000
sp|P63054|PCP4_MOUSE;tr|D3YXH0|D3YXH0_MOUSE	sp|P63054|PCP4_MOUSE;tr|D3YXH0|D3YXH0_MOUSE	sp|P63054|PCP4_MOUSE Calmodulin regulator protein PCP4 OS=Mus musculus GN=Pcp4 PE=3 SV=2;tr|D3YXH0|D3YXH0_MOUSE Immunoglobulin superfamily member 5 OS=Mus musculus GN=Igsf5 PE=4 SV=1											24041000	28916000
sp|P63101|1433Z_MOUSE;tr|Q3UA58|Q3UA58_MOUSE;tr|D3YXN6|D3YXN6_MOUSE;tr|Q8BWN0|Q8BWN0_MOUSE;tr|D3YXF4|D3YXF4_MOUSE;tr|D3YW45|D3YW45_MOUSE	sp|P63101|1433Z_MOUSE	sp|P63101|1433Z_MOUSE 14-3-3 protein zeta/delta OS=Mus musculus GN=Ywhaz PE=1 SV=1	232800000	111560000		83544000	282900000	147550000	209590000	102260000		241800000	216780000	186030000
sp|P63242|IF5A1_MOUSE;tr|A0A0A0MQM0|A0A0A0MQM0_MOUSE;tr|J3QPS8|J3QPS8_MOUSE;sp|Q8BGY2|IF5A2_MOUSE	sp|P63242|IF5A1_MOUSE;tr|A0A0A0MQM0|A0A0A0MQM0_MOUSE	sp|P63242|IF5A1_MOUSE Eukaryotic translation initiation factor 5A-1 OS=Mus musculus GN=Eif5a PE=1 SV=2;tr|A0A0A0MQM0|A0A0A0MQM0_MOUSE Eukaryotic translation initiation factor 5A (Fragment) OS=Mus musculus GN=Eif5a PE=1 SV=1	191495000	82198000		43711000	229960000	104700000	195360000	74231000	56568000	175800000	103390000	135570000
sp|P63248|IPKA_MOUSE	sp|P63248|IPKA_MOUSE	sp|P63248|IPKA_MOUSE cAMP-dependent protein kinase inhibitor alpha OS=Mus musculus GN=Pkia PE=1 SV=2	13965000
sp|P63330|PP2AA_MOUSE;tr|Q8BN07|Q8BN07_MOUSE;sp|P62715|PP2AB_MOUSE;tr|Q8VED4|Q8VED4_MOUSE	sp|P63330|PP2AA_MOUSE;tr|Q8BN07|Q8BN07_MOUSE;sp|P62715|PP2AB_MOUSE	sp|P63330|PP2AA_MOUSE Serine/threonine-protein phosphatase 2A catalytic subunit alpha isoform OS=Mus musculus GN=Ppp2ca PE=1 SV=1;tr|Q8BN07|Q8BN07_MOUSE Serine/threonine-protein phosphatase (Fragment) OS=Mus musculus GN=Ppp2cb PE=2 SV=1;sp|P62715|PP2AB_MOU	49989500					27651000	33229000			30882000	36299000
sp|P68040|RACK1_MOUSE	sp|P68040|RACK1_MOUSE	sp|P68040|RACK1_MOUSE Receptor of activated protein C kinase 1 OS=Mus musculus GN=Rack1 PE=1 SV=3		17390000			37256000	23742000			29378000
sp|P68134|ACTS_MOUSE;tr|Q9CXK3|Q9CXK3_MOUSE;tr|Q497E4|Q497E4_MOUSE;tr|Q3TG92|Q3TG92_MOUSE;sp|P68033|ACTC_MOUSE;tr|Q3UIJ3|Q3UIJ3_MOUSE;sp|P62737|ACTA_MOUSE;tr|Q61264|Q61264_MOUSE;tr|Q61275|Q61275_MOUSE;tr|Q61272|Q61272_MOUSE;tr|Q3UJ36|Q3UJ36_MOUSE;sp|P63268|ACTH_MOUSE;tr|Q3U122|Q3U122_MOUSE;tr|Q61852|Q61852_MOUSE;tr|D3YZY0|D3YZY0_MOUSE;tr|D3Z2K3|D3Z2K3_MOUSE;tr|Q61274|Q61274_MOUSE;tr|A0A1D5RM20|A0…	sp|P68134|ACTS_MOUSE;tr|Q9CXK3|Q9CXK3_MOUSE;tr|Q497E4|Q497E4_MOUSE;tr|Q3TG92|Q3TG92_MOUSE;sp|P68033|ACTC_MOUSE;tr|Q3UIJ3|Q3UIJ3_MOUSE;sp|P62737|ACTA_MOUSE;tr|Q61264|Q61264_MOUSE;tr|Q61275|Q61275_MOUSE;tr|Q61272|Q61272_MOUSE;tr|Q3UJ36|Q3UJ36_MOUSE;sp|P63268|ACTH_MOUSE;tr|Q3U122|Q3U122_MOUSE;tr|Q61852|Q61852_MOUSE;tr|D3YZY0|D3YZY0_MOUSE;tr|D3Z2K3|D3Z2K3_MOUSE	sp|P68134|ACTS_MOUSE Actin, alpha skeletal muscle OS=Mus musculus GN=Acta1 PE=1 SV=1;tr|Q9CXK3|Q9CXK3_MOUSE Uncharacterized protein OS=Mus musculus GN=Actc1 PE=2 SV=1;tr|Q497E4|Q497E4_MOUSE Actin, alpha, cardiac muscle 1 OS=Mus musculus GN=Actc1 PE=2 SV=1;	3432050000	2357100000	2063600000	1746800000	3785100000	3288900000	3692300000	2377400000	2734200000	2376300000	3736100000	2756200000
sp|P68368|TBA4A_MOUSE;tr|A0A0A0MQA5|A0A0A0MQA5_MOUSE;tr|A0A087WQS4|A0A087WQS4_MOUSE;tr|A0A087WRB4|A0A087WRB4_MOUSE;tr|A0A087WSB0|A0A087WSB0_MOUSE;tr|A0A087WSL5|A0A087WSL5_MOUSE;tr|A0A087WS35|A0A087WS35_MOUSE	sp|P68368|TBA4A_MOUSE;tr|A0A0A0MQA5|A0A0A0MQA5_MOUSE	sp|P68368|TBA4A_MOUSE Tubulin alpha-4A chain OS=Mus musculus GN=Tuba4a PE=1 SV=1;tr|A0A0A0MQA5|A0A0A0MQA5_MOUSE Tubulin alpha chain (Fragment) OS=Mus musculus GN=Tuba4a PE=1 SV=1	305120000	110800000	63137000	84954000	335820000	297180000	279750000	129670000	185600000	435120000	408540000	187720000
sp|P68369|TBA1A_MOUSE;tr|Q5FW91|Q5FW91_MOUSE;sp|P05214|TBA3_MOUSE;tr|Q9D9Y2|Q9D9Y2_MOUSE	sp|P68369|TBA1A_MOUSE;tr|Q5FW91|Q5FW91_MOUSE;sp|P05214|TBA3_MOUSE;tr|Q9D9Y2|Q9D9Y2_MOUSE	sp|P68369|TBA1A_MOUSE Tubulin alpha-1A chain OS=Mus musculus GN=Tuba1a PE=1 SV=1;tr|Q5FW91|Q5FW91_MOUSE Tubulin alpha chain OS=Mus musculus GN=Tuba3a PE=1 SV=1;sp|P05214|TBA3_MOUSE Tubulin alpha-3 chain OS=Mus musculus GN=Tuba3a PE=1 SV=1;tr|Q9D9Y2|Q9D9Y2_	115475000	85469000		98357000	230660000	208390000	166750000		122470000	224250000	195780000	107370000
sp|P68372|TBB4B_MOUSE;tr|Q9CVR0|Q9CVR0_MOUSE;tr|Q9DCR1|Q9DCR1_MOUSE;tr|G3UZR1|G3UZR1_MOUSE;sp|A2AQ07|TBB1_MOUSE;CON__ENSEMBL:ENSBTAP00000025008;tr|Q62363|Q62363_MOUSE	sp|P68372|TBB4B_MOUSE;tr|Q9CVR0|Q9CVR0_MOUSE;tr|Q9DCR1|Q9DCR1_MOUSE	sp|P68372|TBB4B_MOUSE Tubulin beta-4B chain OS=Mus musculus GN=Tubb4b PE=1 SV=1;tr|Q9CVR0|Q9CVR0_MOUSE Tubulin beta chain (Fragment) OS=Mus musculus GN=Tubb4b PE=2 SV=2;tr|Q9DCR1|Q9DCR1_MOUSE Uncharacterized protein (Fragment) OS=Mus musculus GN=Tubb4b PE=	305420000	142910000		124840000	454760000	370150000	354580000	136310000	228830000	388510000	470030000	240350000
sp|P68510|1433F_MOUSE;tr|Q8BJH3|Q8BJH3_MOUSE	sp|P68510|1433F_MOUSE	sp|P68510|1433F_MOUSE 14-3-3 protein eta OS=Mus musculus GN=Ywhah PE=1 SV=2					28420000
sp|P70232|NCHL1_MOUSE;tr|A0A0N4SUL1|A0A0N4SUL1_MOUSE	sp|P70232|NCHL1_MOUSE	sp|P70232|NCHL1_MOUSE Neural cell adhesion molecule L1-like protein OS=Mus musculus GN=Chl1 PE=1 SV=2	63132000	348570000	264900000	498340000	83755000	198100000	184460000	94326000	301080000	183640000	123230000	204990000
sp|P70274|SEPP1_MOUSE;tr|E0CZC5|E0CZC5_MOUSE;tr|E0CX80|E0CX80_MOUSE;tr|E0CZ76|E0CZ76_MOUSE;tr|E0CY03|E0CY03_MOUSE	sp|P70274|SEPP1_MOUSE;tr|E0CZC5|E0CZC5_MOUSE;tr|E0CX80|E0CX80_MOUSE	sp|P70274|SEPP1_MOUSE Selenoprotein P OS=Mus musculus GN=Selenop PE=1 SV=3;tr|E0CZC5|E0CZC5_MOUSE Selenoprotein P (Fragment) OS=Mus musculus GN=Selenop PE=1 SV=1;tr|E0CX80|E0CX80_MOUSE Selenoprotein P (Fragment) OS=Mus musculus GN=Selenop PE=1 SV=1	96313500	68184000	57261000	80959000	78963000	49040000	80044000	70014000	43079000	59866000	69128000	77064000
sp|P70349|HINT1_MOUSE;tr|B0R1E3|B0R1E3_MOUSE	sp|P70349|HINT1_MOUSE;tr|B0R1E3|B0R1E3_MOUSE	sp|P70349|HINT1_MOUSE Histidine triad nucleotide-binding protein 1 OS=Mus musculus GN=Hint1 PE=1 SV=3;tr|B0R1E3|B0R1E3_MOUSE Histidine triad nucleotide-binding protein 1 OS=Mus musculus GN=Hint1 PE=1 SV=1	238220000	114300000		96013000	219510000	193280000	228770000		80699000	144280000	125740000	156550000
sp|P70670|NACAM_MOUSE;tr|Q3UK68|Q3UK68_MOUSE;sp|Q60817|NACA_MOUSE	sp|P70670|NACAM_MOUSE	sp|P70670|NACAM_MOUSE Nascent polypeptide-associated complex subunit alpha, muscle-specific form OS=Mus musculus GN=Naca PE=1 SV=2											19680000
sp|P84084|ARF5_MOUSE	sp|P84084|ARF5_MOUSE	sp|P84084|ARF5_MOUSE ADP-ribosylation factor 5 OS=Mus musculus GN=Arf5 PE=1 SV=2							6648400
sp|P97290|IC1_MOUSE;tr|A2ATR8|A2ATR8_MOUSE;CON__P50448	sp|P97290|IC1_MOUSE;tr|A2ATR8|A2ATR8_MOUSE	sp|P97290|IC1_MOUSE Plasma protease C1 inhibitor OS=Mus musculus GN=Serping1 PE=1 SV=3;tr|A2ATR8|A2ATR8_MOUSE Plasma protease C1 inhibitor OS=Mus musculus GN=Serping1 PE=1 SV=1	521195000	597930000	595630000	633440000	339670000	446250000	385530000	489280000	458330000	370060000	324040000	319780000
sp|P97298|PEDF_MOUSE;tr|B7ZC25|B7ZC25_MOUSE;tr|Q5ND37|Q5ND37_MOUSE;tr|F6S1M4|F6S1M4_MOUSE;tr|E9PWS2|E9PWS2_MOUSE;CON__Q95121	sp|P97298|PEDF_MOUSE	sp|P97298|PEDF_MOUSE Pigment epithelium-derived factor OS=Mus musculus GN=Serpinf1 PE=1 SV=2	686985000	1226200000	1175100000	1007400000	957460000	1074700000	933500000	966920000	1081700000	703990000	718480000	1009800000
sp|P97384|ANX11_MOUSE;tr|D3Z7U0|D3Z7U0_MOUSE	sp|P97384|ANX11_MOUSE;tr|D3Z7U0|D3Z7U0_MOUSE	sp|P97384|ANX11_MOUSE Annexin A11 OS=Mus musculus GN=Anxa11 PE=1 SV=2;tr|D3Z7U0|D3Z7U0_MOUSE Annexin OS=Mus musculus GN=Anxa11 PE=1 SV=1						10027000
sp|P97447|FHL1_MOUSE;tr|A2AEX8|A2AEX8_MOUSE;tr|A2AEX6|A2AEX6_MOUSE;tr|A2AEY1|A2AEY1_MOUSE;tr|A2AEY2|A2AEY2_MOUSE;tr|A2AEX7|A2AEX7_MOUSE;tr|A2AEY0|A2AEY0_MOUSE;tr|A2AEX9|A2AEX9_MOUSE;tr|Q9DAH0|Q9DAH0_MOUSE;tr|Q8CDC8|Q8CDC8_MOUSE;tr|Q6P8P1|Q6P8P1_MOUSE;tr|O70403|O70403_MOUSE	sp|P97447|FHL1_MOUSE;tr|A2AEX8|A2AEX8_MOUSE;tr|A2AEX6|A2AEX6_MOUSE;tr|A2AEY1|A2AEY1_MOUSE;tr|A2AEY2|A2AEY2_MOUSE;tr|A2AEX7|A2AEX7_MOUSE	sp|P97447|FHL1_MOUSE Four and a half LIM domains protein 1 OS=Mus musculus GN=Fhl1 PE=1 SV=3;tr|A2AEX8|A2AEX8_MOUSE Four and a half LIM domains 1, isoform CRA_b OS=Mus musculus GN=Fhl1 PE=1 SV=1;tr|A2AEX6|A2AEX6_MOUSE Four and a half LIM domains protein 1	3436700000	889420000	859750000	577000000	1150600000	1253100000	1162600000	503730000	473040000	560410000	2414900000	877480000
sp|P97450|ATP5J_MOUSE;tr|Q812D0|Q812D0_MOUSE;tr|E9QAD6|E9QAD6_MOUSE	sp|P97450|ATP5J_MOUSE;tr|Q812D0|Q812D0_MOUSE;tr|E9QAD6|E9QAD6_MOUSE	sp|P97450|ATP5J_MOUSE ATP synthase-coupling factor 6, mitochondrial OS=Mus musculus GN=Atp5j PE=1 SV=1;tr|Q812D0|Q812D0_MOUSE ATP synthase coupling factor VI (Fragment) OS=Mus musculus PE=4 SV=1;tr|E9QAD6|E9QAD6_MOUSE ATP synthase-coupling factor 6, mitoch							12615000
sp|P97467|AMD_MOUSE;tr|F8VQA4|F8VQA4_MOUSE;tr|E9Q704|E9Q704_MOUSE;tr|Q3V1A8|Q3V1A8_MOUSE;tr|Q8BQ31|Q8BQ31_MOUSE;tr|A1L331|A1L331_MOUSE;tr|F6TGI4|F6TGI4_MOUSE;tr|F7D4K4|F7D4K4_MOUSE;tr|F6T0D3|F6T0D3_MOUSE	sp|P97467|AMD_MOUSE;tr|F8VQA4|F8VQA4_MOUSE;tr|E9Q704|E9Q704_MOUSE;tr|Q3V1A8|Q3V1A8_MOUSE	sp|P97467|AMD_MOUSE Peptidyl-glycine alpha-amidating monooxygenase OS=Mus musculus GN=Pam PE=1 SV=2;tr|F8VQA4|F8VQA4_MOUSE Peptidyl-glycine alpha-amidating monooxygenase OS=Mus musculus GN=Pam PE=1 SV=1;tr|E9Q704|E9Q704_MOUSE Peptidyl-glycine alpha-amidati	159610000	239630000	241360000	316940000	129670000	221450000	153050000	192110000	218580000	165230000	171230000	168560000
sp|P97807|FUMH_MOUSE;tr|H3BKG7|H3BKG7_MOUSE	sp|P97807|FUMH_MOUSE	sp|P97807|FUMH_MOUSE Fumarate hydratase, mitochondrial OS=Mus musculus GN=Fh PE=1 SV=3	32355000	24777000			52134000	37744000	27345000		27360000		20218000
sp|P98063|BMP1_MOUSE	sp|P98063|BMP1_MOUSE	sp|P98063|BMP1_MOUSE Bone morphogenetic protein 1 OS=Mus musculus GN=Bmp1 PE=1 SV=2				8497800
sp|P99024|TBB5_MOUSE;tr|Q80ZV2|Q80ZV2_MOUSE	sp|P99024|TBB5_MOUSE	sp|P99024|TBB5_MOUSE Tubulin beta-5 chain OS=Mus musculus GN=Tubb5 PE=1 SV=1	45222500			24850000	81870000	58221000	81823000	24151000	28872000	65831000	58802000	44054000
sp|P99026|PSB4_MOUSE	sp|P99026|PSB4_MOUSE	sp|P99026|PSB4_MOUSE Proteasome subunit beta type-4 OS=Mus musculus GN=Psmb4 PE=1 SV=1											17091000
sp|P99027|RLA2_MOUSE	sp|P99027|RLA2_MOUSE	sp|P99027|RLA2_MOUSE 60S acidic ribosomal protein P2 OS=Mus musculus GN=Rplp2 PE=1 SV=3					89413000	104320000	56327000
sp|Q00897|A1AT4_MOUSE	sp|Q00897|A1AT4_MOUSE	sp|Q00897|A1AT4_MOUSE Alpha-1-antitrypsin 1-4 OS=Mus musculus GN=Serpina1d PE=1 SV=1	23551500000	29056000000	26609000000	29738000000	18820000000	19368000000	31452000000	35666000000	27060000000	45938000000	40767000000	47889000000
sp|Q00898|A1AT5_MOUSE;tr|D3YZL0|D3YZL0_MOUSE	sp|Q00898|A1AT5_MOUSE	sp|Q00898|A1AT5_MOUSE Alpha-1-antitrypsin 1-5 OS=Mus musculus GN=Serpina1e PE=1 SV=1	425120000	1011800000	614500000	1661600000	274080000	763770000	2009400000	3101100000	806000000	3212500000	3914800000	2393600000
sp|Q01339|APOH_MOUSE;tr|Q6LAL7|Q6LAL7_MOUSE;tr|Q9CY42|Q9CY42_MOUSE;tr|I7HJR3|I7HJR3_MOUSE;tr|I7HPW5|I7HPW5_MOUSE;CON__P17690	sp|Q01339|APOH_MOUSE;tr|Q6LAL7|Q6LAL7_MOUSE;tr|Q9CY42|Q9CY42_MOUSE	sp|Q01339|APOH_MOUSE Beta-2-glycoprotein 1 OS=Mus musculus GN=Apoh PE=1 SV=1;tr|Q6LAL7|Q6LAL7_MOUSE Beta-2 glycoprotein I (Fragment) OS=Mus musculus PE=4 SV=1;tr|Q9CY42|Q9CY42_MOUSE Uncharacterized protein OS=Mus musculus GN=Apoh PE=2 SV=1	792585000	1537300000	964130000	1456000000	582060000	959130000	1248300000	1352200000	1347400000	894970000	837010000	1111800000
sp|Q01853|TERA_MOUSE;tr|Q8BNF8|Q8BNF8_MOUSE	sp|Q01853|TERA_MOUSE;tr|Q8BNF8|Q8BNF8_MOUSE	sp|Q01853|TERA_MOUSE Transitional endoplasmic reticulum ATPase OS=Mus musculus GN=Vcp PE=1 SV=4;tr|Q8BNF8|Q8BNF8_MOUSE Uncharacterized protein OS=Mus musculus GN=Vcp PE=2 SV=1	396550000	172030000	121370000	116120000	241850000	309030000	261980000	190300000	139600000	434400000	330720000	309680000
sp|Q02105|C1QC_MOUSE	sp|Q02105|C1QC_MOUSE	sp|Q02105|C1QC_MOUSE Complement C1q subcomponent subunit C OS=Mus musculus GN=C1qc PE=1 SV=2	35068000	53751000		44533000
sp|Q02257|PLAK_MOUSE	sp|Q02257|PLAK_MOUSE	sp|Q02257|PLAK_MOUSE Junction plakoglobin OS=Mus musculus GN=Jup PE=1 SV=3					12765000
sp|Q02788|CO6A2_MOUSE;tr|D3Z7D5|D3Z7D5_MOUSE	sp|Q02788|CO6A2_MOUSE;tr|D3Z7D5|D3Z7D5_MOUSE	sp|Q02788|CO6A2_MOUSE Collagen alpha-2(VI) chain OS=Mus musculus GN=Col6a2 PE=1 SV=3;tr|D3Z7D5|D3Z7D5_MOUSE Collagen alpha-2(VI) chain OS=Mus musculus GN=Col6a2 PE=1 SV=1					19348000
sp|Q03157|APLP1_MOUSE;tr|Q3U311|Q3U311_MOUSE;tr|A0A0R4IZZ1|A0A0R4IZZ1_MOUSE;tr|Q3TUB1|Q3TUB1_MOUSE;tr|Q3TCA7|Q3TCA7_MOUSE	sp|Q03157|APLP1_MOUSE;tr|Q3U311|Q3U311_MOUSE;tr|A0A0R4IZZ1|A0A0R4IZZ1_MOUSE;tr|Q3TUB1|Q3TUB1_MOUSE;tr|Q3TCA7|Q3TCA7_MOUSE	sp|Q03157|APLP1_MOUSE Amyloid-like protein 1 OS=Mus musculus GN=Aplp1 PE=1 SV=1;tr|Q3U311|Q3U311_MOUSE Uncharacterized protein OS=Mus musculus GN=Aplp1 PE=2 SV=1;tr|A0A0R4IZZ1|A0A0R4IZZ1_MOUSE Amyloid beta (A4)-like protein 1 OS=Mus musculus GN=Aplp1 PE=1	1384750000	2459800000	2206200000	3308300000	1059600000	1639100000	1625700000	1504000000	1700100000	994120000	965080000	1203600000
sp|Q03265|ATPA_MOUSE;tr|D3Z6F5|D3Z6F5_MOUSE;tr|Q3U452|Q3U452_MOUSE;tr|D6RJ16|D6RJ16_MOUSE	sp|Q03265|ATPA_MOUSE;tr|D3Z6F5|D3Z6F5_MOUSE	sp|Q03265|ATPA_MOUSE ATP synthase subunit alpha, mitochondrial OS=Mus musculus GN=Atp5a1 PE=1 SV=1;tr|D3Z6F5|D3Z6F5_MOUSE ATP synthase subunit alpha OS=Mus musculus GN=Atp5a1 PE=1 SV=1	255130000	182460000	127110000	97776000	731600000	1273400000	450040000	240340000	323770000	236930000	376180000	150770000
sp|Q03517|SCG2_MOUSE;tr|Q4W8U9|Q4W8U9_MOUSE	sp|Q03517|SCG2_MOUSE;tr|Q4W8U9|Q4W8U9_MOUSE	sp|Q03517|SCG2_MOUSE Secretogranin-2 OS=Mus musculus GN=Scg2 PE=1 SV=1;tr|Q4W8U9|Q4W8U9_MOUSE Scg2 protein OS=Mus musculus GN=Scg2 PE=1 SV=1	670115000	992960000	1523800000	1776700000	766360000	1336900000	959500000	921300000	1185400000	807560000	883140000	1064600000
sp|Q03734|SPA3M_MOUSE	sp|Q03734|SPA3M_MOUSE	sp|Q03734|SPA3M_MOUSE Serine protease inhibitor A3M OS=Mus musculus GN=Serpina3m PE=1 SV=2											20763000
sp|Q04447|KCRB_MOUSE	sp|Q04447|KCRB_MOUSE	sp|Q04447|KCRB_MOUSE Creatine kinase B-type OS=Mus musculus GN=Ckb PE=1 SV=1	440365000	279280000	179070000	255730000	1294300000	737160000	697140000	813520000	565720000	1720100000	1670700000	1045500000
sp|Q04857|CO6A1_MOUSE;tr|Q8C6Y0|Q8C6Y0_MOUSE;tr|Q99LW4|Q99LW4_MOUSE	sp|Q04857|CO6A1_MOUSE;tr|Q8C6Y0|Q8C6Y0_MOUSE;tr|Q99LW4|Q99LW4_MOUSE	sp|Q04857|CO6A1_MOUSE Collagen alpha-1(VI) chain OS=Mus musculus GN=Col6a1 PE=1 SV=1;tr|Q8C6Y0|Q8C6Y0_MOUSE Uncharacterized protein OS=Mus musculus GN=Col6a1 PE=2 SV=1;tr|Q99LW4|Q99LW4_MOUSE Col6a1 protein (Fragment) OS=Mus musculus GN=Col6a1 PE=2 SV=1					61840000		30891000
sp|Q07456|AMBP_MOUSE	sp|Q07456|AMBP_MOUSE	sp|Q07456|AMBP_MOUSE Protein AMBP OS=Mus musculus GN=Ambp PE=1 SV=2	178605000	153920000	175910000	157630000	203950000	192610000	170590000	222610000	185670000	197960000	163620000	176630000
sp|Q07797|LG3BP_MOUSE;tr|E9Q5X5|E9Q5X5_MOUSE;tr|F6VRP8|F6VRP8_MOUSE	sp|Q07797|LG3BP_MOUSE	sp|Q07797|LG3BP_MOUSE Galectin-3-binding protein OS=Mus musculus GN=Lgals3bp PE=1 SV=1	63058000	76054000	92194000	69493000	54326000	61709000	66796000	68246000	78007000	78658000	63122000	84150000
sp|Q08890|IDS_MOUSE;tr|Q3V1R8|Q3V1R8_MOUSE;tr|Q684Q4|Q684Q4_MOUSE;tr|Q8CJ15|Q8CJ15_MOUSE;tr|F6X9C5|F6X9C5_MOUSE	sp|Q08890|IDS_MOUSE;tr|Q3V1R8|Q3V1R8_MOUSE;tr|Q684Q4|Q684Q4_MOUSE	sp|Q08890|IDS_MOUSE Iduronate 2-sulfatase OS=Mus musculus GN=Ids PE=2 SV=3;tr|Q3V1R8|Q3V1R8_MOUSE Uncharacterized protein (Fragment) OS=Mus musculus GN=Ids PE=2 SV=1;tr|Q684Q4|Q684Q4_MOUSE Iduronate 2-sulfatase (Fragment) OS=Mus musculus GN=Ids PE=2 SV=1		35346000
sp|Q11011|PSA_MOUSE;tr|F6QYF8|F6QYF8_MOUSE;tr|E9Q039|E9Q039_MOUSE;tr|E9Q6F4|E9Q6F4_MOUSE;tr|F6V7K3|F6V7K3_MOUSE	sp|Q11011|PSA_MOUSE;tr|F6QYF8|F6QYF8_MOUSE;tr|E9Q039|E9Q039_MOUSE;tr|E9Q6F4|E9Q6F4_MOUSE	sp|Q11011|PSA_MOUSE Puromycin-sensitive aminopeptidase OS=Mus musculus GN=Npepps PE=1 SV=2;tr|F6QYF8|F6QYF8_MOUSE Aminopeptidase (Fragment) OS=Mus musculus GN=Npepps PE=1 SV=1;tr|E9Q039|E9Q039_MOUSE Aminopeptidase OS=Mus musculus GN=Npepps PE=1 SV=1;tr|E9Q	32424000				29204000	18387000					29345000
sp|Q19LI2|A1BG_MOUSE	sp|Q19LI2|A1BG_MOUSE	sp|Q19LI2|A1BG_MOUSE Alpha-1B-glycoprotein OS=Mus musculus GN=A1bg PE=1 SV=1	79395000				247730000
sp|Q1XH17|TRI72_MOUSE	sp|Q1XH17|TRI72_MOUSE	sp|Q1XH17|TRI72_MOUSE Tripartite motif-containing protein 72 OS=Mus musculus GN=Trim72 PE=1 SV=1											27481000
sp|Q3TMH2|SCRN3_MOUSE;tr|Q6P6J8|Q6P6J8_MOUSE;tr|A2AWQ9|A2AWQ9_MOUSE	sp|Q3TMH2|SCRN3_MOUSE;tr|Q6P6J8|Q6P6J8_MOUSE;tr|A2AWQ9|A2AWQ9_MOUSE	sp|Q3TMH2|SCRN3_MOUSE Secernin-3 OS=Mus musculus GN=Scrn3 PE=1 SV=1;tr|Q6P6J8|Q6P6J8_MOUSE Scrn3 protein (Fragment) OS=Mus musculus GN=Scrn3 PE=2 SV=1;tr|A2AWQ9|A2AWQ9_MOUSE Secernin 3, isoform CRA_b OS=Mus musculus GN=Scrn3 PE=1 SV=1	29010000	15410000			19045000	22816000	24417000	16282000		22100000	24869000	22696000
sp|Q3UGR5|HDHD2_MOUSE;tr|D3YZI3|D3YZI3_MOUSE;tr|D3YUN7|D3YUN7_MOUSE	sp|Q3UGR5|HDHD2_MOUSE	sp|Q3UGR5|HDHD2_MOUSE Haloacid dehalogenase-like hydrolase domain-containing protein 2 OS=Mus musculus GN=Hdhd2 PE=1 SV=2				11229000	23037000				22654000
sp|Q3UV17|K22O_MOUSE	sp|Q3UV17|K22O_MOUSE	sp|Q3UV17|K22O_MOUSE Keratin, type II cytoskeletal 2 oral OS=Mus musculus GN=Krt76 PE=1 SV=1									705420000
sp|Q3V1D3|AMPD1_MOUSE;tr|A0A0G2JFD4|A0A0G2JFD4_MOUSE;tr|H3BLC7|H3BLC7_MOUSE;tr|H3BIY4|H3BIY4_MOUSE	sp|Q3V1D3|AMPD1_MOUSE;tr|A0A0G2JFD4|A0A0G2JFD4_MOUSE	sp|Q3V1D3|AMPD1_MOUSE AMP deaminase 1 OS=Mus musculus GN=Ampd1 PE=1 SV=2;tr|A0A0G2JFD4|A0A0G2JFD4_MOUSE AMP deaminase OS=Mus musculus GN=Ampd1 PE=1 SV=1	8905200
sp|Q3V2C1|KRA93_MOUSE;tr|A2A588|A2A588_MOUSE;tr|Q3V2D6|Q3V2D6_MOUSE;tr|Q9D6Z9|Q9D6Z9_MOUSE;tr|A2A590|A2A590_MOUSE	sp|Q3V2C1|KRA93_MOUSE;tr|A2A588|A2A588_MOUSE;tr|Q3V2D6|Q3V2D6_MOUSE;tr|Q9D6Z9|Q9D6Z9_MOUSE;tr|A2A590|A2A590_MOUSE	sp|Q3V2C1|KRA93_MOUSE Keratin-associated protein 9-3 OS=Mus musculus GN=Krtap9-3 PE=2 SV=1;tr|A2A588|A2A588_MOUSE Keratin-associated protein 1-3 OS=Mus musculus GN=Krtap1-3 PE=4 SV=1;tr|Q3V2D6|Q3V2D6_MOUSE Keratin-associated protein 1-4 OS=Mus musculus GN=					250900000
sp|Q497I4|KRT35_MOUSE;CON__Q497I4	sp|Q497I4|KRT35_MOUSE;CON__Q497I4	sp|Q497I4|KRT35_MOUSE Keratin, type I cuticular Ha5 OS=Mus musculus GN=Krt35 PE=1 SV=1;					50005000
sp|Q4V9Z5|SE6L2_MOUSE	sp|Q4V9Z5|SE6L2_MOUSE	sp|Q4V9Z5|SE6L2_MOUSE Seizure 6-like protein 2 OS=Mus musculus GN=Sez6l2 PE=1 SV=1	60844500	96858000	89244000	73814000	50274000	93889000	59699000	63893000	78426000	49700000	37951000	48680000
sp|Q5EBG6|HSPB6_MOUSE;tr|Q3UN84|Q3UN84_MOUSE	sp|Q5EBG6|HSPB6_MOUSE;tr|Q3UN84|Q3UN84_MOUSE	sp|Q5EBG6|HSPB6_MOUSE Heat shock protein beta-6 OS=Mus musculus GN=Hspb6 PE=1 SV=1;tr|Q3UN84|Q3UN84_MOUSE Uncharacterized protein (Fragment) OS=Mus musculus GN=Hspb6 PE=2 SV=1	106570000
sp|Q5FW60|MUP20_MOUSE	sp|Q5FW60|MUP20_MOUSE	sp|Q5FW60|MUP20_MOUSE Major urinary protein 20 OS=Mus musculus GN=Mup20 PE=1 SV=1							8977700
sp|Q5FW85|ECM2_MOUSE	sp|Q5FW85|ECM2_MOUSE	sp|Q5FW85|ECM2_MOUSE Extracellular matrix protein 2 OS=Mus musculus GN=Ecm2 PE=1 SV=1						14742000
sp|Q5SX39|MYH4_MOUSE;tr|Q9JHR4|Q9JHR4_MOUSE;tr|Q3UUB1|Q3UUB1_MOUSE;tr|Q56A77|Q56A77_MOUSE;tr|Q3UW38|Q3UW38_MOUSE;tr|Q3UQQ3|Q3UQQ3_MOUSE;tr|Q5BKR0|Q5BKR0_MOUSE;tr|Q6P8P3|Q6P8P3_MOUSE;tr|M0QWL0|M0QWL0_MOUSE;tr|Q5DTH2|Q5DTH2_MOUSE;tr|Q1WNQ6|Q1WNQ6_MOUSE;tr|Q1WJJ3|Q1WJJ3_MOUSE;tr|Q9WUS6|Q9WUS6_MOUSE;tr|Q9WUS8|Q9WUS8_MOUSE;tr|Q1WNQ9|Q1WNQ9_MOUSE;tr|Q61934|Q61934_MOUSE;tr|E9Q264|E9Q264_MOUSE	sp|Q5SX39|MYH4_MOUSE	sp|Q5SX39|MYH4_MOUSE Myosin-4 OS=Mus musculus GN=Myh4 PE=2 SV=1	160300000	81597000	72513000	36763000	136080000	355330000	226860000	32999000	120800000		115100000	88694000
sp|Q5SX40|MYH1_MOUSE;tr|B2RWX0|B2RWX0_MOUSE;tr|Q9ESW6|Q9ESW6_MOUSE;tr|Q8BLW0|Q8BLW0_MOUSE;tr|Q3TT35|Q3TT35_MOUSE;tr|B1AR69|B1AR69_MOUSE	sp|Q5SX40|MYH1_MOUSE;tr|B2RWX0|B2RWX0_MOUSE	sp|Q5SX40|MYH1_MOUSE Myosin-1 OS=Mus musculus GN=Myh1 PE=1 SV=1;tr|B2RWX0|B2RWX0_MOUSE Myosin, heavy polypeptide 1, skeletal muscle, adult OS=Mus musculus GN=Myh1 PE=2 SV=1	1021850000	208000000	201290000	27540000	716610000	1815600000	742460000	29932000	394720000	53793000	393170000	147820000
sp|Q5XKE0|MYPC2_MOUSE;tr|A0A140LI70|A0A140LI70_MOUSE	sp|Q5XKE0|MYPC2_MOUSE	sp|Q5XKE0|MYPC2_MOUSE Myosin-binding protein C, fast-type OS=Mus musculus GN=Mybpc2 PE=1 SV=1						105270000					85229000
sp|Q60590|A1AG1_MOUSE;tr|Q91X23|Q91X23_MOUSE;tr|Q61613|Q61613_MOUSE	sp|Q60590|A1AG1_MOUSE;tr|Q91X23|Q91X23_MOUSE;tr|Q61613|Q61613_MOUSE	sp|Q60590|A1AG1_MOUSE Alpha-1-acid glycoprotein 1 OS=Mus musculus GN=Orm1 PE=1 SV=1;tr|Q91X23|Q91X23_MOUSE Alpha-1-acid glycoprotein OS=Mus musculus GN=Orm1 PE=2 SV=1;tr|Q61613|Q61613_MOUSE Alpha-1-acid glycoprotein (AGP) (Fragment) OS=Mus musculus GN=Orm1	613130000	624820000	947860000	741560000	1214500000	357630000	724030000	871390000	600530000	851610000	675730000	783280000
sp|Q60668|HNRPD_MOUSE;tr|Q3UXC8|Q3UXC8_MOUSE	sp|Q60668|HNRPD_MOUSE;tr|Q3UXC8|Q3UXC8_MOUSE	sp|Q60668|HNRPD_MOUSE Heterogeneous nuclear ribonucleoprotein D0 OS=Mus musculus GN=Hnrnpd PE=1 SV=2;tr|Q3UXC8|Q3UXC8_MOUSE Uncharacterized protein (Fragment) OS=Mus musculus GN=Hnrnpd PE=2 SV=1							3940300
sp|Q60692|PSB6_MOUSE	sp|Q60692|PSB6_MOUSE	sp|Q60692|PSB6_MOUSE Proteasome subunit beta type-6 OS=Mus musculus GN=Psmb6 PE=1 SV=3	53677500									49755000	36244000
sp|Q60841|RELN_MOUSE;tr|Q64FW1|Q64FW1_MOUSE;tr|Q148P9|Q148P9_MOUSE	sp|Q60841|RELN_MOUSE	sp|Q60841|RELN_MOUSE Reelin OS=Mus musculus GN=Reln PE=1 SV=3	36455500	72495000	71896000	73540000		50595000		32360000	66187000	60481000	31220000	38564000
sp|Q60932|VDAC1_MOUSE;tr|Q3TIG8|Q3TIG8_MOUSE;tr|Q3THL7|Q3THL7_MOUSE;tr|Q3U6K8|Q3U6K8_MOUSE;tr|F2Z471|F2Z471_MOUSE	sp|Q60932|VDAC1_MOUSE;tr|Q3TIG8|Q3TIG8_MOUSE;tr|Q3THL7|Q3THL7_MOUSE;tr|Q3U6K8|Q3U6K8_MOUSE;tr|F2Z471|F2Z471_MOUSE	sp|Q60932|VDAC1_MOUSE Voltage-dependent anion-selective channel protein 1 OS=Mus musculus GN=Vdac1 PE=1 SV=3;tr|Q3TIG8|Q3TIG8_MOUSE Uncharacterized protein OS=Mus musculus GN=Vdac1 PE=2 SV=1;tr|Q3THL7|Q3THL7_MOUSE Uncharacterized protein OS=Mus musculus GN	51182000				104580000	153030000	61548000
sp|Q60963|PAFA_MOUSE;tr|Q9DB74|Q9DB74_MOUSE;tr|E9Q330|E9Q330_MOUSE;tr|Q3U1V7|Q3U1V7_MOUSE;tr|E9Q6J0|E9Q6J0_MOUSE;tr|E9Q4T5|E9Q4T5_MOUSE	sp|Q60963|PAFA_MOUSE;tr|Q9DB74|Q9DB74_MOUSE;tr|E9Q330|E9Q330_MOUSE;tr|Q3U1V7|Q3U1V7_MOUSE	sp|Q60963|PAFA_MOUSE Platelet-activating factor acetylhydrolase OS=Mus musculus GN=Pla2g7 PE=2 SV=2;tr|Q9DB74|Q9DB74_MOUSE Platelet-activating factor acetylhydrolase OS=Mus musculus GN=Pla2g7 PE=2 SV=1;tr|E9Q330|E9Q330_MOUSE Platelet-activating factor acet	184965000	261080000	316680000	436150000	172640000	318350000	197230000	193780000	253310000	176990000	117880000	165950000
sp|Q61112|CAB45_MOUSE;sp|Q9BRK5|CAB45_HUMAN	sp|Q61112|CAB45_MOUSE	sp|Q61112|CAB45_MOUSE 45 kDa calcium-binding protein OS=Mus musculus GN=Sdf4 PE=1 SV=1				22688000
sp|Q61129|CFAI_MOUSE;tr|A0A0G2JF07|A0A0G2JF07_MOUSE	sp|Q61129|CFAI_MOUSE	sp|Q61129|CFAI_MOUSE Complement factor I OS=Mus musculus GN=Cfi PE=1 SV=3	393235000	457510000	397690000	386220000	360830000	331810000	412350000	513460000	474240000	450050000	371330000	405070000
sp|Q61147|CERU_MOUSE;tr|E9PZD8|E9PZD8_MOUSE;tr|G3X9T8|G3X9T8_MOUSE;tr|G3X8Q5|G3X8Q5_MOUSE;tr|Q8BV37|Q8BV37_MOUSE;tr|Q2F3J4|Q2F3J4_MOUSE;tr|G3UXG1|G3UXG1_MOUSE;tr|G3UWP5|G3UWP5_MOUSE;CON__ENSEMBL:ENSBTAP00000031900;tr|G3UZ53|G3UZ53_MOUSE	sp|Q61147|CERU_MOUSE;tr|E9PZD8|E9PZD8_MOUSE;tr|G3X9T8|G3X9T8_MOUSE;tr|G3X8Q5|G3X8Q5_MOUSE	sp|Q61147|CERU_MOUSE Ceruloplasmin OS=Mus musculus GN=Cp PE=1 SV=2;tr|E9PZD8|E9PZD8_MOUSE Ceruloplasmin OS=Mus musculus GN=Cp PE=1 SV=1;tr|G3X9T8|G3X9T8_MOUSE Ceruloplasmin OS=Mus musculus GN=Cp PE=1 SV=1;tr|G3X8Q5|G3X8Q5_MOUSE Ceruloplasmin OS=Mus musculu	2616500000	3316800000	3401700000	3082500000	2194800000	2703000000	2563700000	3168800000	3515800000	3265400000	3105200000	3158100000
sp|Q61171|PRDX2_MOUSE;tr|D3Z4A4|D3Z4A4_MOUSE;tr|Q5M9N9|Q5M9N9_MOUSE	sp|Q61171|PRDX2_MOUSE;tr|D3Z4A4|D3Z4A4_MOUSE;tr|Q5M9N9|Q5M9N9_MOUSE	sp|Q61171|PRDX2_MOUSE Peroxiredoxin-2 OS=Mus musculus GN=Prdx2 PE=1 SV=3;tr|D3Z4A4|D3Z4A4_MOUSE Peroxiredoxin-2 (Fragment) OS=Mus musculus GN=Prdx2 PE=1 SV=8;tr|Q5M9N9|Q5M9N9_MOUSE Prdx2 protein OS=Mus musculus GN=Prdx2 PE=2 SV=1	3142700000	904800000	1034800000	657170000	1864800000	1931700000	1774500000	1561500000	1036200000	3548700000	1602100000	2353200000
sp|Q61220|NELL2_MOUSE;tr|Q8BM43|Q8BM43_MOUSE;tr|Q8BM06|Q8BM06_MOUSE	sp|Q61220|NELL2_MOUSE;tr|Q8BM43|Q8BM43_MOUSE;tr|Q8BM06|Q8BM06_MOUSE	sp|Q61220|NELL2_MOUSE Protein kinase C-binding protein NELL2 OS=Mus musculus GN=Nell2 PE=1 SV=3;tr|Q8BM43|Q8BM43_MOUSE Uncharacterized protein (Fragment) OS=Mus musculus GN=Nell2 PE=2 SV=1;tr|Q8BM06|Q8BM06_MOUSE Uncharacterized protein OS=Mus musculus GN=N	176345000	446860000	344340000	561180000	151350000	229470000	173720000	183470000	351540000	184710000	137640000	194940000
sp|Q61292|LAMB2_MOUSE	sp|Q61292|LAMB2_MOUSE	sp|Q61292|LAMB2_MOUSE Laminin subunit beta-2 OS=Mus musculus GN=Lamb2 PE=1 SV=2				24337000
sp|Q61361|PGCB_MOUSE;tr|Q3TQE9|Q3TQE9_MOUSE;tr|A0A0A6YW95|A0A0A6YW95_MOUSE;tr|Q3TSQ8|Q3TSQ8_MOUSE	sp|Q61361|PGCB_MOUSE	sp|Q61361|PGCB_MOUSE Brevican core protein OS=Mus musculus GN=Bcan PE=1 SV=2	163745000	401090000	448760000	649890000	248640000	332280000	266870000	301990000	371790000	203080000	203490000	237440000
sp|Q61362|CH3L1_MOUSE;tr|D3Z2Z5|D3Z2Z5_MOUSE;tr|D3YXU4|D3YXU4_MOUSE	sp|Q61362|CH3L1_MOUSE	sp|Q61362|CH3L1_MOUSE Chitinase-3-like protein 1 OS=Mus musculus GN=Chi3l1 PE=1 SV=3			69172000	88818000		45547000			74229000
sp|Q61425|HCDH_MOUSE	sp|Q61425|HCDH_MOUSE	sp|Q61425|HCDH_MOUSE Hydroxyacyl-coenzyme A dehydrogenase, mitochondrial OS=Mus musculus GN=Hadh PE=1 SV=2	36387000				50839000	49168000	41204000				38943000	43632000
sp|Q61468|MSLN_MOUSE	sp|Q61468|MSLN_MOUSE	sp|Q61468|MSLN_MOUSE Mesothelin OS=Mus musculus GN=Msln PE=1 SV=1				4079000
sp|Q61477|NBL1_MOUSE	sp|Q61477|NBL1_MOUSE	sp|Q61477|NBL1_MOUSE Neuroblastoma suppressor of tumorigenicity 1 OS=Mus musculus GN=Nbl1 PE=1 SV=2	161580000	208600000	272280000	288970000	117820000	238620000	145420000	174620000	180880000	123900000	97961000	98009000
sp|Q61554|FBN1_MOUSE;tr|O88840|O88840_MOUSE;tr|Q3TNW1|Q3TNW1_MOUSE	sp|Q61554|FBN1_MOUSE;tr|O88840|O88840_MOUSE	sp|Q61554|FBN1_MOUSE Fibrillin-1 OS=Mus musculus GN=Fbn1 PE=1 SV=2;tr|O88840|O88840_MOUSE Mutant fibrillin-1 OS=Mus musculus GN=Fbn1 PE=2 SV=1							14568000
sp|Q61592|GAS6_MOUSE	sp|Q61592|GAS6_MOUSE	sp|Q61592|GAS6_MOUSE Growth arrest-specific protein 6 OS=Mus musculus GN=Gas6 PE=2 SV=2		12923000
sp|Q61598|GDIB_MOUSE;tr|Q3UC72|Q3UC72_MOUSE;tr|Q3UPA3|Q3UPA3_MOUSE;tr|Q3UUX9|Q3UUX9_MOUSE;tr|Q3TIY6|Q3TIY6_MOUSE;tr|A0A1Y7VL99|A0A1Y7VL99_MOUSE;tr|Q9CZ18|Q9CZ18_MOUSE;tr|A0A1Y7VLG4|A0A1Y7VLG4_MOUSE	sp|Q61598|GDIB_MOUSE;tr|Q3UC72|Q3UC72_MOUSE;tr|Q3UPA3|Q3UPA3_MOUSE;tr|Q3UUX9|Q3UUX9_MOUSE;tr|Q3TIY6|Q3TIY6_MOUSE;tr|A0A1Y7VL99|A0A1Y7VL99_MOUSE;tr|Q9CZ18|Q9CZ18_MOUSE	sp|Q61598|GDIB_MOUSE Rab GDP dissociation inhibitor beta OS=Mus musculus GN=Gdi2 PE=1 SV=1;tr|Q3UC72|Q3UC72_MOUSE Rab GDP dissociation inhibitor (Fragment) OS=Mus musculus GN=Gdi2 PE=2 SV=1;tr|Q3UPA3|Q3UPA3_MOUSE Rab GDP dissociation inhibitor (Fragment) O	209455000	105820000	72043000		204320000	130260000	183210000		114310000	218070000	219250000	167830000
sp|Q61702|ITIH1_MOUSE;tr|Q91WU7|Q91WU7_MOUSE;tr|F8WJ05|F8WJ05_MOUSE;tr|Q8K159|Q8K159_MOUSE;CON__Q0VCM5	sp|Q61702|ITIH1_MOUSE;tr|Q91WU7|Q91WU7_MOUSE;tr|F8WJ05|F8WJ05_MOUSE;tr|Q8K159|Q8K159_MOUSE	sp|Q61702|ITIH1_MOUSE Inter-alpha-trypsin inhibitor heavy chain H1 OS=Mus musculus GN=Itih1 PE=1 SV=2;tr|Q91WU7|Q91WU7_MOUSE Inter-alpha trypsin inhibitor, heavy chain 1 (Fragment) OS=Mus musculus GN=Itih1 PE=2 SV=1;tr|F8WJ05|F8WJ05_MOUSE Inter-alpha-tryps	53204500	47750000	37071000	33952000	64308000	94627000	75171000	61636000		86620000	68152000	58943000
sp|Q61704|ITIH3_MOUSE;CON__Q0V8M9	sp|Q61704|ITIH3_MOUSE	sp|Q61704|ITIH3_MOUSE Inter-alpha-trypsin inhibitor heavy chain H3 OS=Mus musculus GN=Itih3 PE=1 SV=3		22731000	29566000	24626000	45671000	28033000	35102000	28859000		26306000	41711000	24025000
sp|Q61765|K1H1_MOUSE;CON__A2A5Y0;tr|Q0VDU1|Q0VDU1_MOUSE;tr|E9PV64|E9PV64_MOUSE;CON__Q6IFU6;sp|Q6RHW0|K1C9_MOUSE	sp|Q61765|K1H1_MOUSE;CON__A2A5Y0	sp|Q61765|K1H1_MOUSE Keratin, type I cuticular Ha1 OS=Mus musculus GN=Krt31 PE=1 SV=2;					4680200000	37321000
sp|Q61790|LAG3_MOUSE	sp|Q61790|LAG3_MOUSE	sp|Q61790|LAG3_MOUSE Lymphocyte activation gene 3 protein OS=Mus musculus GN=Lag3 PE=2 SV=1									35900000
sp|Q61805|LBP_MOUSE;tr|F6XKX9|F6XKX9_MOUSE;tr|A2AC65|A2AC65_MOUSE	sp|Q61805|LBP_MOUSE;tr|F6XKX9|F6XKX9_MOUSE	sp|Q61805|LBP_MOUSE Lipopolysaccharide-binding protein OS=Mus musculus GN=Lbp PE=1 SV=2;tr|F6XKX9|F6XKX9_MOUSE Lipopolysaccharide-binding protein (Fragment) OS=Mus musculus GN=Lbp PE=1 SV=8							32686000
sp|Q61838|PZP_MOUSE;tr|D3YUI3|D3YUI3_MOUSE	sp|Q61838|PZP_MOUSE	sp|Q61838|PZP_MOUSE Pregnancy zone protein OS=Mus musculus GN=Pzp PE=1 SV=3	12983000000	5822200000	6415500000	3897700000	7178100000	8539400000	8296300000	11683000000	6852500000	19898000000	13307000000	10714000000
sp|Q61885|MOG_MOUSE;tr|Q3UY21|Q3UY21_MOUSE;tr|Q80YU5|Q80YU5_MOUSE;tr|Q29ZQ5|Q29ZQ5_MOUSE;tr|Q66JM2|Q66JM2_MOUSE	sp|Q61885|MOG_MOUSE;tr|Q3UY21|Q3UY21_MOUSE;tr|Q80YU5|Q80YU5_MOUSE;tr|Q29ZQ5|Q29ZQ5_MOUSE;tr|Q66JM2|Q66JM2_MOUSE	sp|Q61885|MOG_MOUSE Myelin-oligodendrocyte glycoprotein OS=Mus musculus GN=Mog PE=1 SV=1;tr|Q3UY21|Q3UY21_MOUSE Myelin-oligodendrocyte glycoprotein OS=Mus musculus GN=Mog PE=1 SV=1;tr|Q80YU5|Q80YU5_MOUSE Myelin oligodendrocyte glycoprotein (Fragment) OS=Mu											14084000
sp|Q61897|KT33B_MOUSE;CON__REFSEQ:XP_986630;sp|Q6IFX3|K1C40_MOUSE;CON__Q6IFU5	sp|Q61897|KT33B_MOUSE;CON__REFSEQ:XP_986630	sp|Q61897|KT33B_MOUSE Keratin, type I cuticular Ha3-II OS=Mus musculus GN=Krt33b PE=1 SV=2;					5850800000	126920000
sp|Q62048|PEA15_MOUSE;tr|D3Z375|D3Z375_MOUSE	sp|Q62048|PEA15_MOUSE;tr|D3Z375|D3Z375_MOUSE	sp|Q62048|PEA15_MOUSE Astrocytic phosphoprotein PEA-15 OS=Mus musculus GN=Pea15 PE=1 SV=1;tr|D3Z375|D3Z375_MOUSE Phosphoprotein-enriched in astrocytes 15A (Fragment) OS=Mus musculus GN=Pea15a PE=1 SV=1	24686000				39960000	27209000	28038000				22154000
sp|Q62148|AL1A2_MOUSE;tr|G3UYH1|G3UYH1_MOUSE	sp|Q62148|AL1A2_MOUSE	sp|Q62148|AL1A2_MOUSE Retinal dehydrogenase 2 OS=Mus musculus GN=Aldh1a2 PE=1 SV=2						94968000	34858000			48539000	81846000
sp|Q62261|SPTB2_MOUSE;tr|A0A0A0MQG2|A0A0A0MQG2_MOUSE;tr|Q5DTR4|Q5DTR4_MOUSE;tr|Q3TTX2|Q3TTX2_MOUSE;tr|Q8BQ35|Q8BQ35_MOUSE;tr|Q3TZN6|Q3TZN6_MOUSE;tr|Q8R1C2|Q8R1C2_MOUSE;tr|Q9Z2V0|Q9Z2V0_MOUSE;tr|Q9R1Y9|Q9R1Y9_MOUSE;tr|Q68FG2|Q68FG2_MOUSE;tr|Q3UGZ4|Q3UGZ4_MOUSE	sp|Q62261|SPTB2_MOUSE;tr|A0A0A0MQG2|A0A0A0MQG2_MOUSE	sp|Q62261|SPTB2_MOUSE Spectrin beta chain, non-erythrocytic 1 OS=Mus musculus GN=Sptbn1 PE=1 SV=2;tr|A0A0A0MQG2|A0A0A0MQG2_MOUSE Spectrin beta chain, non-erythrocytic 1 (Fragment) OS=Mus musculus GN=Sptbn1 PE=1 SV=1		67186000			214590000	111160000	100660000	23791000	52933000		87937000	29962000
sp|Q62356|FSTL1_MOUSE	sp|Q62356|FSTL1_MOUSE	sp|Q62356|FSTL1_MOUSE Follistatin-related protein 1 OS=Mus musculus GN=Fstl1 PE=1 SV=2	45520000	58098000		74245000		66493000	40200000	46867000	54629000		28935000	39202000
sp|Q640N1|AEBP1_MOUSE	sp|Q640N1|AEBP1_MOUSE	sp|Q640N1|AEBP1_MOUSE Adipocyte enhancer-binding protein 1 OS=Mus musculus GN=Aebp1 PE=1 SV=1			55111000	77898000	38131000	57645000	45962000
sp|Q64442|DHSO_MOUSE;tr|Q71VF6|Q71VF6_MOUSE	sp|Q64442|DHSO_MOUSE	sp|Q64442|DHSO_MOUSE Sorbitol dehydrogenase OS=Mus musculus GN=Sord PE=1 SV=3								9159000
sp|Q64726|ZA2G_MOUSE	sp|Q64726|ZA2G_MOUSE	sp|Q64726|ZA2G_MOUSE Zinc-alpha-2-glycoprotein OS=Mus musculus GN=Azgp1 PE=1 SV=2	193270000	340640000	271450000	318020000	192880000	254580000	281960000	327750000	316120000	267290000	243050000	312970000
sp|Q64727|VINC_MOUSE	sp|Q64727|VINC_MOUSE	sp|Q64727|VINC_MOUSE Vinculin OS=Mus musculus GN=Vcl PE=1 SV=4	46061500	26685000		25685000	52187000	45476000	34769000	32498000	31510000	24380000	30730000
sp|Q68FD5|CLH1_MOUSE;tr|Q5SXR6|Q5SXR6_MOUSE;tr|Q80U89|Q80U89_MOUSE;tr|Q3UPJ3|Q3UPJ3_MOUSE;tr|Q3TYQ2|Q3TYQ2_MOUSE;tr|Q3U0H2|Q3U0H2_MOUSE;tr|Q3TAN1|Q3TAN1_MOUSE;tr|Q8K2I5|Q8K2I5_MOUSE;tr|Q3TJ98|Q3TJ98_MOUSE	sp|Q68FD5|CLH1_MOUSE;tr|Q5SXR6|Q5SXR6_MOUSE;tr|Q80U89|Q80U89_MOUSE;tr|Q3UPJ3|Q3UPJ3_MOUSE	sp|Q68FD5|CLH1_MOUSE Clathrin heavy chain 1 OS=Mus musculus GN=Cltc PE=1 SV=3;tr|Q5SXR6|Q5SXR6_MOUSE Clathrin heavy chain OS=Mus musculus GN=Cltc PE=1 SV=1;tr|Q80U89|Q80U89_MOUSE MKIAA0034 protein (Fragment) OS=Mus musculus GN=mKIAA0034 PE=4 SV=2;tr|Q3UPJ3	30738000	56412000			146620000	166340000	107600000	23116000	67162000	61306000	85929000
sp|Q6GQT1|A2MG_MOUSE	sp|Q6GQT1|A2MG_MOUSE	sp|Q6GQT1|A2MG_MOUSE Alpha-2-macroglobulin-P OS=Mus musculus GN=A2m PE=2 SV=2	448820000	606110000	661910000	571500000	258280000	469680000	326300000	438810000	652650000	468350000	433320000	533840000
sp|Q6IFX4|K1C39_MOUSE;CON__A2VCT4	sp|Q6IFX4|K1C39_MOUSE;CON__A2VCT4	sp|Q6IFX4|K1C39_MOUSE Keratin, type I cytoskeletal 39 OS=Mus musculus GN=Krt39 PE=2 SV=2;					16680000
sp|Q6IMF0|KRT87_MOUSE	sp|Q6IMF0|KRT87_MOUSE	sp|Q6IMF0|KRT87_MOUSE Keratin, type II cuticular 87 OS=Mus musculus GN=Krt87 PE=2 SV=2					2667300000	42467000	26237000
sp|Q6IRU2|TPM4_MOUSE	sp|Q6IRU2|TPM4_MOUSE	sp|Q6IRU2|TPM4_MOUSE Tropomyosin alpha-4 chain OS=Mus musculus GN=Tpm4 PE=1 SV=3					64162000	37179000	55019000	38056000
sp|Q6P8J7|KCRS_MOUSE;tr|Q545N7|Q545N7_MOUSE;sp|P30275|KCRU_MOUSE;tr|B0R0E9|B0R0E9_MOUSE;tr|B0R0F0|B0R0F0_MOUSE;tr|A2ARP5|A2ARP5_MOUSE	sp|Q6P8J7|KCRS_MOUSE	sp|Q6P8J7|KCRS_MOUSE Creatine kinase S-type, mitochondrial OS=Mus musculus GN=Ckmt2 PE=1 SV=1	442350000	235450000	139030000	104000000	372190000	405750000	479720000	179380000	173310000		229400000	154660000
sp|Q6PIC6|AT1A3_MOUSE;tr|A0A0G2JGX4|A0A0G2JGX4_MOUSE;tr|Q8VCE0|Q8VCE0_MOUSE;tr|Q8R0E8|Q8R0E8_MOUSE	sp|Q6PIC6|AT1A3_MOUSE;tr|A0A0G2JGX4|A0A0G2JGX4_MOUSE;tr|Q8VCE0|Q8VCE0_MOUSE;tr|Q8R0E8|Q8R0E8_MOUSE	sp|Q6PIC6|AT1A3_MOUSE Sodium/potassium-transporting ATPase subunit alpha-3 OS=Mus musculus GN=Atp1a3 PE=1 SV=1;tr|A0A0G2JGX4|A0A0G2JGX4_MOUSE Sodium/potassium-transporting ATPase subunit alpha OS=Mus musculus GN=Atp1a3 PE=1 SV=1;tr|Q8VCE0|Q8VCE0_MOUSE Sodi											37753000
sp|Q6ZWN5|RS9_MOUSE;tr|F7CJS8|F7CJS8_MOUSE;tr|D3YWH9|D3YWH9_MOUSE;tr|Q96EC0|Q96EC0_MOUSE;tr|Q9CXW7|Q9CXW7_MOUSE	sp|Q6ZWN5|RS9_MOUSE;tr|F7CJS8|F7CJS8_MOUSE;tr|D3YWH9|D3YWH9_MOUSE;tr|Q96EC0|Q96EC0_MOUSE;tr|Q9CXW7|Q9CXW7_MOUSE	sp|Q6ZWN5|RS9_MOUSE 40S ribosomal protein S9 OS=Mus musculus GN=Rps9 PE=1 SV=3;tr|F7CJS8|F7CJS8_MOUSE 40S ribosomal protein S9 (Fragment) OS=Mus musculus GN=Rps9 PE=1 SV=1;tr|D3YWH9|D3YWH9_MOUSE 40S ribosomal protein S9 OS=Mus musculus GN=Rps9 PE=1 SV=1;tr									6092900
sp|Q71M36|CSPG5_MOUSE	sp|Q71M36|CSPG5_MOUSE	sp|Q71M36|CSPG5_MOUSE Chondroitin sulfate proteoglycan 5 OS=Mus musculus GN=Cspg5 PE=1 SV=2		64755000	73628000	86377000		47976000	37297000	58007000	66571000
sp|Q7TMM9|TBB2A_MOUSE;tr|B2RSN3|B2RSN3_MOUSE;sp|Q9CWF2|TBB2B_MOUSE;tr|Q99J49|Q99J49_MOUSE	sp|Q7TMM9|TBB2A_MOUSE;tr|B2RSN3|B2RSN3_MOUSE;sp|Q9CWF2|TBB2B_MOUSE;tr|Q99J49|Q99J49_MOUSE	sp|Q7TMM9|TBB2A_MOUSE Tubulin beta-2A chain OS=Mus musculus GN=Tubb2a PE=1 SV=1;tr|B2RSN3|B2RSN3_MOUSE Tubulin beta chain OS=Mus musculus GN=Tubb2b PE=1 SV=1;sp|Q9CWF2|TBB2B_MOUSE Tubulin beta-2B chain OS=Mus musculus GN=Tubb2b PE=1 SV=1;tr|Q99J49|Q99J49_M					43861000
sp|Q80XD8|PRAP1_MOUSE	sp|Q80XD8|PRAP1_MOUSE	sp|Q80XD8|PRAP1_MOUSE Proline-rich acidic protein 1 OS=Mus musculus GN=Prap1 PE=2 SV=1							24090000				20079000
sp|Q80YC5|FA12_MOUSE;tr|E9Q698|E9Q698_MOUSE	sp|Q80YC5|FA12_MOUSE	sp|Q80YC5|FA12_MOUSE Coagulation factor XII OS=Mus musculus GN=F12 PE=1 SV=2	87413500	147480000	125710000	111680000	96840000	125070000	111150000	155070000	141530000	130920000	138000000	144100000
sp|Q8BGY3|LUZP2_MOUSE	sp|Q8BGY3|LUZP2_MOUSE	sp|Q8BGY3|LUZP2_MOUSE Leucine zipper protein 2 OS=Mus musculus GN=Luzp2 PE=2 SV=1		25724000		31954000
sp|Q8BH35|CO8B_MOUSE;tr|Q8BGT4|Q8BGT4_MOUSE	sp|Q8BH35|CO8B_MOUSE	sp|Q8BH35|CO8B_MOUSE Complement component C8 beta chain OS=Mus musculus GN=C8b PE=1 SV=1		39260000	39811000	45775000		31097000	27347000	40253000		61732000	34090000	35003000
sp|Q8BH59|CMC1_MOUSE	sp|Q8BH59|CMC1_MOUSE	sp|Q8BH59|CMC1_MOUSE Calcium-binding mitochondrial carrier protein Aralar1 OS=Mus musculus GN=Slc25a12 PE=1 SV=1					11219000
sp|Q8BH95|ECHM_MOUSE;tr|Q8BU95|Q8BU95_MOUSE	sp|Q8BH95|ECHM_MOUSE;tr|Q8BU95|Q8BU95_MOUSE	sp|Q8BH95|ECHM_MOUSE Enoyl-CoA hydratase, mitochondrial OS=Mus musculus GN=Echs1 PE=1 SV=1;tr|Q8BU95|Q8BU95_MOUSE Enoyl Coenzyme A hydratase, short chain, 1, mitochondrial, isoform CRA_c OS=Mus musculus GN=Echs1 PE=2 SV=1						18534000
sp|Q8BHN3|GANAB_MOUSE;tr|A1A4T2|A1A4T2_MOUSE	sp|Q8BHN3|GANAB_MOUSE;tr|A1A4T2|A1A4T2_MOUSE	sp|Q8BHN3|GANAB_MOUSE Neutral alpha-glucosidase AB OS=Mus musculus GN=Ganab PE=1 SV=1;tr|A1A4T2|A1A4T2_MOUSE Alpha glucosidase 2 alpha neutral subunit OS=Mus musculus GN=Ganab PE=2 SV=1									3984700
sp|Q8BJD1|ITIH5_MOUSE	sp|Q8BJD1|ITIH5_MOUSE	sp|Q8BJD1|ITIH5_MOUSE Inter-alpha-trypsin inhibitor heavy chain H5 OS=Mus musculus GN=Itih5 PE=1 SV=1									17158000
sp|Q8BMF4|ODP2_MOUSE;tr|Q99LL2|Q99LL2_MOUSE	sp|Q8BMF4|ODP2_MOUSE	sp|Q8BMF4|ODP2_MOUSE Dihydrolipoyllysine-residue acetyltransferase component of pyruvate dehydrogenase complex, mitochondrial OS=Mus musculus GN=Dlat PE=1 SV=2					14620000	21507000
sp|Q8BMS1|ECHA_MOUSE;tr|Q3TB39|Q3TB39_MOUSE	sp|Q8BMS1|ECHA_MOUSE	sp|Q8BMS1|ECHA_MOUSE Trifunctional enzyme subunit alpha, mitochondrial OS=Mus musculus GN=Hadha PE=1 SV=1					83812000	121390000	41355000
sp|Q8BND5|QSOX1_MOUSE	sp|Q8BND5|QSOX1_MOUSE	sp|Q8BND5|QSOX1_MOUSE Sulfhydryl oxidase 1 OS=Mus musculus GN=Qsox1 PE=1 SV=1	260845000	251780000	335060000	379130000	228060000	270820000	237400000	240260000	272540000	236320000	246700000	228260000
sp|Q8BPB5|FBLN3_MOUSE;tr|Q8K0J4|Q8K0J4_MOUSE;tr|Q8R1U8|Q8R1U8_MOUSE;tr|F6ZFS0|F6ZFS0_MOUSE;tr|Q3TRR8|Q3TRR8_MOUSE	sp|Q8BPB5|FBLN3_MOUSE;tr|Q8K0J4|Q8K0J4_MOUSE	sp|Q8BPB5|FBLN3_MOUSE EGF-containing fibulin-like extracellular matrix protein 1 OS=Mus musculus GN=Efemp1 PE=1 SV=1;tr|Q8K0J4|Q8K0J4_MOUSE Epidermal growth factor-containing fibulin-like extracellular matrix protein 1 OS=Mus musculus GN=Efemp1 PE=2 SV=1	32139000	369740000	204170000	467600000	70121000	188020000	169690000	103990000	200690000		75692000	70775000
sp|Q8BWP8|B4GA1_MOUSE	sp|Q8BWP8|B4GA1_MOUSE	sp|Q8BWP8|B4GA1_MOUSE Beta-1,4-glucuronyltransferase 1 OS=Mus musculus GN=B4gat1 PE=1 SV=1		55422000		51780000	36556000	44159000	34686000
sp|Q8BWT1|THIM_MOUSE;tr|Q3UKH3|Q3UKH3_MOUSE	sp|Q8BWT1|THIM_MOUSE;tr|Q3UKH3|Q3UKH3_MOUSE	sp|Q8BWT1|THIM_MOUSE 3-ketoacyl-CoA thiolase, mitochondrial OS=Mus musculus GN=Acaa2 PE=1 SV=3;tr|Q3UKH3|Q3UKH3_MOUSE Uncharacterized protein OS=Mus musculus GN=Acaa2 PE=2 SV=1	45522000	49267000	42407000		68078000	132800000	61657000		39629000		54242000
sp|Q8BX43|TR19L_MOUSE;tr|D3YWL9|D3YWL9_MOUSE;tr|D6RIM1|D6RIM1_MOUSE;tr|D3Z306|D3Z306_MOUSE	sp|Q8BX43|TR19L_MOUSE;tr|D3YWL9|D3YWL9_MOUSE	sp|Q8BX43|TR19L_MOUSE Tumor necrosis factor receptor superfamily member 19L OS=Mus musculus GN=Relt PE=2 SV=2;tr|D3YWL9|D3YWL9_MOUSE Tumor necrosis factor receptor superfamily member 19L (Fragment) OS=Mus musculus GN=Relt PE=4 SV=1	22093000	36423000	36679000	38572000	19250000	36398000		18130000	29242000	23482000		19653000
sp|Q8C0M9|ASGL1_MOUSE	sp|Q8C0M9|ASGL1_MOUSE	sp|Q8C0M9|ASGL1_MOUSE Isoaspartyl peptidase/L-asparaginase OS=Mus musculus GN=Asrgl1 PE=1 SV=1	27450000
sp|Q8C1I6|KR163_MOUSE	sp|Q8C1I6|KR163_MOUSE	sp|Q8C1I6|KR163_MOUSE Keratin-associated protein 16-3 OS=Mus musculus GN=Krtap16-3 PE=2 SV=1					151870000
sp|Q8CG14|CS1A_MOUSE;tr|Q14DT6|Q14DT6_MOUSE;tr|E9Q6C2|E9Q6C2_MOUSE;tr|Q3T9K7|Q3T9K7_MOUSE;sp|Q8CFG8|CS1B_MOUSE;tr|A0A1W2P7F1|A0A1W2P7F1_MOUSE	sp|Q8CG14|CS1A_MOUSE;tr|Q14DT6|Q14DT6_MOUSE;tr|E9Q6C2|E9Q6C2_MOUSE;tr|Q3T9K7|Q3T9K7_MOUSE	sp|Q8CG14|CS1A_MOUSE Complement C1s-A subcomponent OS=Mus musculus GN=C1sa PE=2 SV=2;tr|Q14DT6|Q14DT6_MOUSE Complement component 1, s subcomponent OS=Mus musculus GN=C1s1 PE=2 SV=1;tr|E9Q6C2|E9Q6C2_MOUSE Complement component 1, s subcomponent 1 OS=Mus musc								9128700
sp|Q8CG76|ARK72_MOUSE	sp|Q8CG76|ARK72_MOUSE	sp|Q8CG76|ARK72_MOUSE Aflatoxin B1 aldehyde reductase member 2 OS=Mus musculus GN=Akr7a2 PE=1 SV=3	16370000
sp|Q8CHP8|PGP_MOUSE;tr|Q9CVY8|Q9CVY8_MOUSE;tr|Q5XK18|Q5XK18_MOUSE;tr|Q3MI13|Q3MI13_MOUSE	sp|Q8CHP8|PGP_MOUSE;tr|Q9CVY8|Q9CVY8_MOUSE	sp|Q8CHP8|PGP_MOUSE Glycerol-3-phosphate phosphatase OS=Mus musculus GN=Pgp PE=1 SV=1;tr|Q9CVY8|Q9CVY8_MOUSE Uncharacterized protein OS=Mus musculus GN=Pgp PE=2 SV=2	36438500				37546000		21331000		20241000	29448000	38415000	28757000
sp|Q8CIF4|BTD_MOUSE;tr|A0A0R4J131|A0A0R4J131_MOUSE	sp|Q8CIF4|BTD_MOUSE;tr|A0A0R4J131|A0A0R4J131_MOUSE	sp|Q8CIF4|BTD_MOUSE Biotinidase OS=Mus musculus GN=Btd PE=1 SV=2;tr|A0A0R4J131|A0A0R4J131_MOUSE Biotinidase OS=Mus musculus GN=Btd PE=1 SV=1		32762000		46887000
sp|Q8K0Y2|KT33A_MOUSE	sp|Q8K0Y2|KT33A_MOUSE	sp|Q8K0Y2|KT33A_MOUSE Keratin, type I cuticular Ha3-I OS=Mus musculus GN=Krt33a PE=1 SV=1					30974000000	270210000	123340000	173090000	21137000
sp|Q8K183|PDXK_MOUSE	sp|Q8K183|PDXK_MOUSE	sp|Q8K183|PDXK_MOUSE Pyridoxal kinase OS=Mus musculus GN=Pdxk PE=1 SV=1	56976500	29099000				82585000	58797000	44901000	56614000	63608000	83603000	56913000
sp|Q8K2B3|SDHA_MOUSE;tr|A0A1Y7VJ55|A0A1Y7VJ55_MOUSE	sp|Q8K2B3|SDHA_MOUSE	sp|Q8K2B3|SDHA_MOUSE Succinate dehydrogenase [ubiquinone] flavoprotein subunit, mitochondrial OS=Mus musculus GN=Sdha PE=1 SV=1					90871000	89417000	47050000
sp|Q8K354|CBR3_MOUSE	sp|Q8K354|CBR3_MOUSE	sp|Q8K354|CBR3_MOUSE Carbonyl reductase [NADPH] 3 OS=Mus musculus GN=Cbr3 PE=1 SV=1							11904000
sp|Q8K4Q8|COL12_MOUSE	sp|Q8K4Q8|COL12_MOUSE	sp|Q8K4Q8|COL12_MOUSE Collectin-12 OS=Mus musculus GN=Colec12 PE=1 SV=1				20623000
sp|Q8K4Z3|NNRE_MOUSE	sp|Q8K4Z3|NNRE_MOUSE	sp|Q8K4Z3|NNRE_MOUSE NAD(P)H-hydrate epimerase OS=Mus musculus GN=Naxe PE=1 SV=1											32720000	24782000
sp|Q8R121|ZPI_MOUSE;CON__ENSEMBL:ENSBTAP00000013050	sp|Q8R121|ZPI_MOUSE	sp|Q8R121|ZPI_MOUSE Protein Z-dependent protease inhibitor OS=Mus musculus GN=Serpina10 PE=1 SV=1								18578000
sp|Q8R1G2|CMBL_MOUSE;tr|E0CXH4|E0CXH4_MOUSE;tr|E0CXT6|E0CXT6_MOUSE	sp|Q8R1G2|CMBL_MOUSE;tr|E0CXH4|E0CXH4_MOUSE;tr|E0CXT6|E0CXT6_MOUSE	sp|Q8R1G2|CMBL_MOUSE Carboxymethylenebutenolidase homolog OS=Mus musculus GN=Cmbl PE=1 SV=1;tr|E0CXH4|E0CXH4_MOUSE Carboxymethylenebutenolidase homolog (Fragment) OS=Mus musculus GN=Cmbl PE=1 SV=1;tr|E0CXT6|E0CXT6_MOUSE Carboxymethylenebutenolidase homolog	51717000				27515000	33169000			34695000		51567000
sp|Q8R1U2|CGRE1_MOUSE;tr|E9QPK1|E9QPK1_MOUSE	sp|Q8R1U2|CGRE1_MOUSE;tr|E9QPK1|E9QPK1_MOUSE	sp|Q8R1U2|CGRE1_MOUSE Cell growth regulator with EF hand domain protein 1 OS=Mus musculus GN=Cgref1 PE=1 SV=1;tr|E9QPK1|E9QPK1_MOUSE Cell growth regulator with EF hand domain protein 1 OS=Mus musculus GN=Cgref1 PE=1 SV=1				33593000
sp|Q8R429|AT2A1_MOUSE;sp|O55143|AT2A2_MOUSE;tr|Q5DTI2|Q5DTI2_MOUSE;tr|Q3V1C4|Q3V1C4_MOUSE;tr|O54994|O54994_MOUSE;tr|Q62268|Q62268_MOUSE;tr|Q3TUZ7|Q3TUZ7_MOUSE;tr|F6RQN3|F6RQN3_MOUSE;tr|Q3U6T4|Q3U6T4_MOUSE	sp|Q8R429|AT2A1_MOUSE	sp|Q8R429|AT2A1_MOUSE Sarcoplasmic/endoplasmic reticulum calcium ATPase 1 OS=Mus musculus GN=Atp2a1 PE=1 SV=1	625875000	237010000	193090000	113570000	739270000	1031500000	604030000	257870000	438360000	111980000	302960000	231980000
sp|Q8R464|CADM4_MOUSE	sp|Q8R464|CADM4_MOUSE	sp|Q8R464|CADM4_MOUSE Cell adhesion molecule 4 OS=Mus musculus GN=Cadm4 PE=1 SV=1	32366000	45781000	66970000	49408000	33386000	39619000	34218000		29551000	33694000	37245000	34556000
sp|Q8R555|CRAC1_MOUSE	sp|Q8R555|CRAC1_MOUSE	sp|Q8R555|CRAC1_MOUSE Cartilage acidic protein 1 OS=Mus musculus GN=Crtac1 PE=2 SV=1	73975500	121540000	137640000	172830000		113590000	73865000	80300000	134790000	85649000	59224000	60993000
sp|Q8VCF1|CANT1_MOUSE	sp|Q8VCF1|CANT1_MOUSE	sp|Q8VCF1|CANT1_MOUSE Soluble calcium-activated nucleotidase 1 OS=Mus musculus GN=Cant1 PE=2 SV=1			9153000
sp|Q8VCT4|CES1D_MOUSE	sp|Q8VCT4|CES1D_MOUSE	sp|Q8VCT4|CES1D_MOUSE Carboxylesterase 1D OS=Mus musculus GN=Ces1d PE=1 SV=1	7380400
sp|Q8VDD5|MYH9_MOUSE;tr|Q3UFT0|Q3UFT0_MOUSE;tr|Q811J9|Q811J9_MOUSE;tr|Q99JJ3|Q99JJ3_MOUSE;tr|Q80T68|Q80T68_MOUSE;sp|Q61879|MYH10_MOUSE;tr|Q5SV64|Q5SV64_MOUSE;tr|Q3UH59|Q3UH59_MOUSE;tr|Q7TQJ6|Q7TQJ6_MOUSE;tr|Q6PB65|Q6PB65_MOUSE;tr|Q4KMN4|Q4KMN4_MOUSE;tr|E9QPE7|E9QPE7_MOUSE;tr|Q69ZX3|Q69ZX3_MOUSE;tr|Q7TQH2|Q7TQH2_MOUSE;tr|Q8BWI3|Q8BWI3_MOUSE;tr|Q8BLI3|Q8BLI3_MOUSE;tr|Q8BLI1|Q8BLI1_MOUSE;sp|O08638|M…	sp|Q8VDD5|MYH9_MOUSE;tr|Q3UFT0|Q3UFT0_MOUSE;tr|Q811J9|Q811J9_MOUSE	sp|Q8VDD5|MYH9_MOUSE Myosin-9 OS=Mus musculus GN=Myh9 PE=1 SV=4;tr|Q3UFT0|Q3UFT0_MOUSE Uncharacterized protein (Fragment) OS=Mus musculus GN=Myh9 PE=2 SV=1;tr|Q811J9|Q811J9_MOUSE Myh9 protein (Fragment) OS=Mus musculus GN=Myh9 PE=2 SV=1					51637000		49661000
sp|Q8VHX6|FLNC_MOUSE;tr|Q3UXJ8|Q3UXJ8_MOUSE	sp|Q8VHX6|FLNC_MOUSE	sp|Q8VHX6|FLNC_MOUSE Filamin-C OS=Mus musculus GN=Flnc PE=1 SV=3											38400000
sp|Q91WP0|MASP2_MOUSE	sp|Q91WP0|MASP2_MOUSE	sp|Q91WP0|MASP2_MOUSE Mannan-binding lectin serine protease 2 OS=Mus musculus GN=Masp2 PE=1 SV=1										10756000
sp|Q91WP6|SPA3N_MOUSE;tr|F2Z405|F2Z405_MOUSE;tr|Q3U0Y1|Q3U0Y1_MOUSE;sp|Q5I2A0|SPA3G_MOUSE;tr|E9Q499|E9Q499_MOUSE;tr|Q4V9W0|Q4V9W0_MOUSE;tr|Q3UE77|Q3UE77_MOUSE;tr|Q3UDB3|Q3UDB3_MOUSE;tr|Q3U1B7|Q3U1B7_MOUSE;tr|A2RTV1|A2RTV1_MOUSE;tr|Q14AS7|Q14AS7_MOUSE;sp|P29621|SPA3C_MOUSE;sp|Q80X76|SPA3F_MOUSE;tr|Q62259|Q62259_MOUSE;tr|Q3UTZ5|Q3UTZ5_MOUSE;tr|H7BWY0|H7BWY0_MOUSE;sp|Q6P4P1|SPA3A_MOUSE	sp|Q91WP6|SPA3N_MOUSE	sp|Q91WP6|SPA3N_MOUSE Serine protease inhibitor A3N OS=Mus musculus GN=Serpina3n PE=1 SV=1				148320000
sp|Q91X72|HEMO_MOUSE;tr|Q8K1U6|Q8K1U6_MOUSE;tr|A0A1B0GS57|A0A1B0GS57_MOUSE	sp|Q91X72|HEMO_MOUSE;tr|Q8K1U6|Q8K1U6_MOUSE	sp|Q91X72|HEMO_MOUSE Hemopexin OS=Mus musculus GN=Hpx PE=1 SV=2;tr|Q8K1U6|Q8K1U6_MOUSE Hemopexin (Fragment) OS=Mus musculus PE=4 SV=1	10643000000	12253000000	18113000000	13663000000	16376000000	12013000000	13385000000	20374000000	12099000000	11098000000	11971000000	12844000000
sp|Q91XV3|BASP1_MOUSE	sp|Q91XV3|BASP1_MOUSE	sp|Q91XV3|BASP1_MOUSE Brain acid soluble protein 1 OS=Mus musculus GN=Basp1 PE=1 SV=3	26848000	29084000		33672000			40614000		55045000	42065000	30193000	33096000
sp|Q921I1|TRFE_MOUSE;tr|E9Q035|E9Q035_MOUSE;tr|F7BAE9|F7BAE9_MOUSE;tr|F7CJN9|F7CJN9_MOUSE;tr|D3YYR8|D3YYR8_MOUSE;tr|E9Q2Q7|E9Q2Q7_MOUSE;tr|E9Q939|E9Q939_MOUSE	sp|Q921I1|TRFE_MOUSE;tr|E9Q035|E9Q035_MOUSE	sp|Q921I1|TRFE_MOUSE Serotransferrin OS=Mus musculus GN=Tf PE=1 SV=1;tr|E9Q035|E9Q035_MOUSE Predicted gene 20425 OS=Mus musculus GN=Gm20425 PE=4 SV=1	65329000000	112920000000	127480000000	124180000000	71472000000	85047000000	85455000000	101930000000	118850000000	83950000000	74544000000	89762000000
sp|Q922B1|MACD1_MOUSE	sp|Q922B1|MACD1_MOUSE	sp|Q922B1|MACD1_MOUSE O-acetyl-ADP-ribose deacetylase MACROD1 OS=Mus musculus GN=Macrod1 PE=1 SV=2	50313000				51528000	41565000	57390000
sp|Q922R8|PDIA6_MOUSE;tr|Q3TML0|Q3TML0_MOUSE;tr|Q3TJL8|Q3TJL8_MOUSE;tr|Q3THH1|Q3THH1_MOUSE;tr|Q9DAB4|Q9DAB4_MOUSE	sp|Q922R8|PDIA6_MOUSE;tr|Q3TML0|Q3TML0_MOUSE;tr|Q3TJL8|Q3TJL8_MOUSE;tr|Q3THH1|Q3THH1_MOUSE;tr|Q9DAB4|Q9DAB4_MOUSE	sp|Q922R8|PDIA6_MOUSE Protein disulfide-isomerase A6 OS=Mus musculus GN=Pdia6 PE=1 SV=3;tr|Q3TML0|Q3TML0_MOUSE Protein disulfide-isomerase A6 OS=Mus musculus GN=Pdia6 PE=1 SV=1;tr|Q3TJL8|Q3TJL8_MOUSE Uncharacterized protein OS=Mus musculus GN=Pdia6 PE=2 SV					17149000
sp|Q925H6|KR193_MOUSE;tr|Q925H5|Q925H5_MOUSE	sp|Q925H6|KR193_MOUSE;tr|Q925H5|Q925H5_MOUSE	sp|Q925H6|KR193_MOUSE Keratin-associated protein 19-3 OS=Mus musculus GN=Krtap19-3 PE=2 SV=1;tr|Q925H5|Q925H5_MOUSE Keratin-associated protein 16.6 (Fragment) OS=Mus musculus GN=Krtap16-6 PE=2 SV=1					125920000
sp|Q93092|TALDO_MOUSE;tr|A0A1B0GR11|A0A1B0GR11_MOUSE	sp|Q93092|TALDO_MOUSE;tr|A0A1B0GR11|A0A1B0GR11_MOUSE	sp|Q93092|TALDO_MOUSE Transaldolase OS=Mus musculus GN=Taldo1 PE=1 SV=2;tr|A0A1B0GR11|A0A1B0GR11_MOUSE Transaldolase OS=Mus musculus GN=Taldo1 PE=1 SV=1	86117000				69757000	40649000	58556000		62469000		59523000
sp|Q99JA0|CALCA_MOUSE;tr|A0A0U1RNG0|A0A0U1RNG0_MOUSE;tr|A0A0U1RNZ0|A0A0U1RNZ0_MOUSE;tr|Q3V1A7|Q3V1A7_MOUSE;sp|P70160|CALC_MOUSE	sp|Q99JA0|CALCA_MOUSE;tr|A0A0U1RNG0|A0A0U1RNG0_MOUSE;tr|A0A0U1RNZ0|A0A0U1RNZ0_MOUSE;tr|Q3V1A7|Q3V1A7_MOUSE;sp|P70160|CALC_MOUSE	sp|Q99JA0|CALCA_MOUSE Calcitonin gene-related peptide 1 OS=Mus musculus GN=Calca PE=2 SV=1;tr|A0A0U1RNG0|A0A0U1RNG0_MOUSE Calcitonin OS=Mus musculus GN=Calca PE=4 SV=1;tr|A0A0U1RNZ0|A0A0U1RNZ0_MOUSE Calcitonin (Fragment) OS=Mus musculus GN=Calca PE=4 SV=1;		47246000	52691000	47648000	39748000		49017000					64765000
sp|Q99JY0|ECHB_MOUSE;tr|D3YXU1|D3YXU1_MOUSE	sp|Q99JY0|ECHB_MOUSE	sp|Q99JY0|ECHB_MOUSE Trifunctional enzyme subunit beta, mitochondrial OS=Mus musculus GN=Hadhb PE=1 SV=1						86565000
sp|Q99KI0|ACON_MOUSE	sp|Q99KI0|ACON_MOUSE	sp|Q99KI0|ACON_MOUSE Aconitate hydratase, mitochondrial OS=Mus musculus GN=Aco2 PE=1 SV=1	593055000	398300000	366720000	140650000	813010000	886220000	669410000	377750000	409830000	259970000	470760000	285500000
sp|Q99KQ4|NAMPT_MOUSE;tr|Q3TLX1|Q3TLX1_MOUSE	sp|Q99KQ4|NAMPT_MOUSE;tr|Q3TLX1|Q3TLX1_MOUSE	sp|Q99KQ4|NAMPT_MOUSE Nicotinamide phosphoribosyltransferase OS=Mus musculus GN=Nampt PE=1 SV=1;tr|Q3TLX1|Q3TLX1_MOUSE Uncharacterized protein OS=Mus musculus GN=Nampt PE=2 SV=1	28647500						18740000				23271000
sp|Q99LC3|NDUAA_MOUSE;tr|A0A087WR38|A0A087WR38_MOUSE	sp|Q99LC3|NDUAA_MOUSE	sp|Q99LC3|NDUAA_MOUSE NADH dehydrogenase [ubiquinone] 1 alpha subcomplex subunit 10, mitochondrial OS=Mus musculus GN=Ndufa10 PE=1 SV=1					21646000	27697000	18597000
sp|Q99LC5|ETFA_MOUSE	sp|Q99LC5|ETFA_MOUSE	sp|Q99LC5|ETFA_MOUSE Electron transfer flavoprotein subunit alpha, mitochondrial OS=Mus musculus GN=Etfa PE=1 SV=2	41754000	34734000			61277000	79959000	49232000				34325000
sp|Q99LD8|DDAH2_MOUSE;tr|O08972|O08972_MOUSE	sp|Q99LD8|DDAH2_MOUSE	sp|Q99LD8|DDAH2_MOUSE N(G),N(G)-dimethylarginine dimethylaminohydrolase 2 OS=Mus musculus GN=Ddah2 PE=1 SV=1					22858000
sp|Q99LX0|PARK7_MOUSE;tr|A2A813|A2A813_MOUSE;tr|A2A815|A2A815_MOUSE;tr|D3K2X3|D3K2X3_MOUSE;tr|A2A817|A2A817_MOUSE;tr|A2A816|A2A816_MOUSE	sp|Q99LX0|PARK7_MOUSE;tr|A2A813|A2A813_MOUSE;tr|A2A815|A2A815_MOUSE	sp|Q99LX0|PARK7_MOUSE Protein/nucleic acid deglycase DJ-1 OS=Mus musculus GN=Park7 PE=1 SV=1;tr|A2A813|A2A813_MOUSE Protein/nucleic acid deglycase DJ-1 OS=Mus musculus GN=Park7 PE=1 SV=1;tr|A2A815|A2A815_MOUSE Protein/nucleic acid deglycase DJ-1 (Fragment)	843965000	274740000	134120000	157820000	412910000	296550000	554710000	209040000	246420000	377820000	343550000	430500000
sp|Q99M71|EPDR1_MOUSE	sp|Q99M71|EPDR1_MOUSE	sp|Q99M71|EPDR1_MOUSE Mammalian ependymin-related protein 1 OS=Mus musculus GN=Epdr1 PE=1 SV=1	82783500	139310000	142770000	126240000	92909000	123920000	107780000	102530000	145390000	97247000	78838000	109220000
sp|Q99M74|KRT82_MOUSE	sp|Q99M74|KRT82_MOUSE	sp|Q99M74|KRT82_MOUSE Keratin, type II cuticular Hb2 OS=Mus musculus GN=Krt82 PE=1 SV=2					1642200
sp|Q99N28|CADM3_MOUSE;tr|K4DI58|K4DI58_MOUSE	sp|Q99N28|CADM3_MOUSE;tr|K4DI58|K4DI58_MOUSE	sp|Q99N28|CADM3_MOUSE Cell adhesion molecule 3 OS=Mus musculus GN=Cadm3 PE=1 SV=1;tr|K4DI58|K4DI58_MOUSE Cell adhesion molecule 3 OS=Mus musculus GN=Cadm3 PE=1 SV=1		57317000	57177000	70116000		44767000	40675000		38193000
sp|Q99PR8|HSPB2_MOUSE;tr|Q6P3C8|Q6P3C8_MOUSE	sp|Q99PR8|HSPB2_MOUSE;tr|Q6P3C8|Q6P3C8_MOUSE	sp|Q99PR8|HSPB2_MOUSE Heat shock protein beta-2 OS=Mus musculus GN=Hspb2 PE=1 SV=2;tr|Q6P3C8|Q6P3C8_MOUSE Heat shock protein 2 OS=Mus musculus GN=Hspb2 PE=2 SV=1											32334000
sp|Q99PT1|GDIR1_MOUSE	sp|Q99PT1|GDIR1_MOUSE	sp|Q99PT1|GDIR1_MOUSE Rho GDP-dissociation inhibitor 1 OS=Mus musculus GN=Arhgdia PE=1 SV=3	304885000	167700000	117750000	104060000	309160000	201570000	307820000	153330000	198580000	174450000	228820000	184150000
sp|Q9CPY7|AMPL_MOUSE;tr|A0A0G2JEM7|A0A0G2JEM7_MOUSE	sp|Q9CPY7|AMPL_MOUSE	sp|Q9CPY7|AMPL_MOUSE Cytosol aminopeptidase OS=Mus musculus GN=Lap3 PE=1 SV=3					11977000	9760700	10554000				11890000	10514000
sp|Q9CQ60|6PGL_MOUSE;tr|D3Z4X1|D3Z4X1_MOUSE;tr|Q8CBG6|Q8CBG6_MOUSE;tr|Q8C6M6|Q8C6M6_MOUSE;tr|F6X8L5|F6X8L5_MOUSE	sp|Q9CQ60|6PGL_MOUSE;tr|D3Z4X1|D3Z4X1_MOUSE;tr|Q8CBG6|Q8CBG6_MOUSE	sp|Q9CQ60|6PGL_MOUSE 6-phosphogluconolactonase OS=Mus musculus GN=Pgls PE=1 SV=1;tr|D3Z4X1|D3Z4X1_MOUSE 6-phosphogluconolactonase OS=Mus musculus GN=Pgls PE=1 SV=1;tr|Q8CBG6|Q8CBG6_MOUSE 6-phosphogluconolactonase OS=Mus musculus GN=Pgls PE=1 SV=1	38080000				41956000		34036000	23605000		31465000	50826000	45810000
sp|Q9CQJ8|NDUB9_MOUSE	sp|Q9CQJ8|NDUB9_MOUSE	sp|Q9CQJ8|NDUB9_MOUSE NADH dehydrogenase [ubiquinone] 1 beta subcomplex subunit 9 OS=Mus musculus GN=Ndufb9 PE=1 SV=3						8956500
sp|Q9CQM5|TXD17_MOUSE	sp|Q9CQM5|TXD17_MOUSE	sp|Q9CQM5|TXD17_MOUSE Thioredoxin domain-containing protein 17 OS=Mus musculus GN=Txndc17 PE=1 SV=1	38355000	20982000			51352000	34791000	35944000	26944000	29551000	28011000	32067000	32117000
sp|Q9CQM9|GLRX3_MOUSE;tr|A0A1B0GS58|A0A1B0GS58_MOUSE;tr|A0A1B0GT04|A0A1B0GT04_MOUSE;tr|A0A1B0GSD3|A0A1B0GSD3_MOUSE	sp|Q9CQM9|GLRX3_MOUSE;tr|A0A1B0GS58|A0A1B0GS58_MOUSE;tr|A0A1B0GT04|A0A1B0GT04_MOUSE	sp|Q9CQM9|GLRX3_MOUSE Glutaredoxin-3 OS=Mus musculus GN=Glrx3 PE=1 SV=1;tr|A0A1B0GS58|A0A1B0GS58_MOUSE Glutaredoxin-3 OS=Mus musculus GN=Glrx3 PE=1 SV=1;tr|A0A1B0GT04|A0A1B0GT04_MOUSE Glutaredoxin-3 (Fragment) OS=Mus musculus GN=Glrx3 PE=1 SV=1	11468000
sp|Q9CQZ5|NDUA6_MOUSE	sp|Q9CQZ5|NDUA6_MOUSE	sp|Q9CQZ5|NDUA6_MOUSE NADH dehydrogenase [ubiquinone] 1 alpha subcomplex subunit 6 OS=Mus musculus GN=Ndufa6 PE=1 SV=1						16145000
sp|Q9CR61|NDUB7_MOUSE	sp|Q9CR61|NDUB7_MOUSE	sp|Q9CR61|NDUB7_MOUSE NADH dehydrogenase [ubiquinone] 1 beta subcomplex subunit 7 OS=Mus musculus GN=Ndufb7 PE=1 SV=3						11459000
sp|Q9CRB6|TPPP3_MOUSE;tr|Q1JPR8|Q1JPR8_MOUSE	sp|Q9CRB6|TPPP3_MOUSE;tr|Q1JPR8|Q1JPR8_MOUSE	sp|Q9CRB6|TPPP3_MOUSE Tubulin polymerization-promoting protein family member 3 OS=Mus musculus GN=Tppp3 PE=1 SV=1;tr|Q1JPR8|Q1JPR8_MOUSE Tppp3 protein (Fragment) OS=Mus musculus GN=Tppp3 PE=2 SV=1	123180000	68261000	41500000	41031000	157680000	100490000	134460000	58716000	78635000	87787000	163780000	158330000
sp|Q9CWJ9|PUR9_MOUSE;tr|B0LAC5|B0LAC5_MOUSE	sp|Q9CWJ9|PUR9_MOUSE	sp|Q9CWJ9|PUR9_MOUSE Bifunctional purine biosynthesis protein PURH OS=Mus musculus GN=Atic PE=1 SV=2	66362000				43979000	47956000	53150000		40907000	59365000	48133000	53161000
sp|Q9CWS0|DDAH1_MOUSE;tr|D3YU15|D3YU15_MOUSE;tr|Q3UF01|Q3UF01_MOUSE	sp|Q9CWS0|DDAH1_MOUSE;tr|D3YU15|D3YU15_MOUSE;tr|Q3UF01|Q3UF01_MOUSE	sp|Q9CWS0|DDAH1_MOUSE N(G),N(G)-dimethylarginine dimethylaminohydrolase 1 OS=Mus musculus GN=Ddah1 PE=1 SV=3;tr|D3YU15|D3YU15_MOUSE Dimethylarginine dimethylaminohydrolase 1, isoform CRA_a OS=Mus musculus GN=Ddah1 PE=1 SV=1;tr|Q3UF01|Q3UF01_MOUSE Uncharact							11755000
sp|Q9CY64|BIEA_MOUSE	sp|Q9CY64|BIEA_MOUSE	sp|Q9CY64|BIEA_MOUSE Biliverdin reductase A OS=Mus musculus GN=Blvra PE=1 SV=1	17066000
sp|Q9CZC8|SCRN1_MOUSE;tr|A0A0N4SWD0|A0A0N4SWD0_MOUSE;tr|D3YXW0|D3YXW0_MOUSE	sp|Q9CZC8|SCRN1_MOUSE;tr|A0A0N4SWD0|A0A0N4SWD0_MOUSE	sp|Q9CZC8|SCRN1_MOUSE Secernin-1 OS=Mus musculus GN=Scrn1 PE=1 SV=1;tr|A0A0N4SWD0|A0A0N4SWD0_MOUSE Secernin-1 (Fragment) OS=Mus musculus GN=Scrn1 PE=1 SV=1										21696000	18837000
sp|Q9CZS1|AL1B1_MOUSE	sp|Q9CZS1|AL1B1_MOUSE	sp|Q9CZS1|AL1B1_MOUSE Aldehyde dehydrogenase X, mitochondrial OS=Mus musculus GN=Aldh1b1 PE=1 SV=1							3427700
sp|Q9CZU6|CISY_MOUSE;tr|Q0QEL9|Q0QEL9_MOUSE;tr|Q9DAM4|Q9DAM4_MOUSE;tr|Q80X68|Q80X68_MOUSE	sp|Q9CZU6|CISY_MOUSE;tr|Q0QEL9|Q0QEL9_MOUSE	sp|Q9CZU6|CISY_MOUSE Citrate synthase, mitochondrial OS=Mus musculus GN=Cs PE=1 SV=1;tr|Q0QEL9|Q0QEL9_MOUSE Citrate synthase (Fragment) OS=Mus musculus GN=Cs PE=2 SV=1	166125000	104490000	127470000	53297000	215550000	245690000	167040000	74283000	103080000	66990000	129540000	70967000
sp|Q9CZX8|RS19_MOUSE;tr|Q5M9P3|Q5M9P3_MOUSE;tr|D3YUT3|D3YUT3_MOUSE;tr|D3YUG3|D3YUG3_MOUSE;tr|D3Z5R8|D3Z5R8_MOUSE;tr|D3Z722|D3Z722_MOUSE;tr|S4R223|S4R223_MOUSE	sp|Q9CZX8|RS19_MOUSE;tr|Q5M9P3|Q5M9P3_MOUSE;tr|D3YUT3|D3YUT3_MOUSE;tr|D3YUG3|D3YUG3_MOUSE;tr|D3Z5R8|D3Z5R8_MOUSE;tr|D3Z722|D3Z722_MOUSE	sp|Q9CZX8|RS19_MOUSE 40S ribosomal protein S19 OS=Mus musculus GN=Rps19 PE=1 SV=3;tr|Q5M9P3|Q5M9P3_MOUSE Rps19 protein (Fragment) OS=Mus musculus GN=Rps19 PE=2 SV=1;tr|D3YUT3|D3YUT3_MOUSE 40S ribosomal protein S19 (Fragment) OS=Mus musculus GN=Rps19 PE=1 S					27044000	27184000
sp|Q9D051|ODPB_MOUSE	sp|Q9D051|ODPB_MOUSE	sp|Q9D051|ODPB_MOUSE Pyruvate dehydrogenase E1 component subunit beta, mitochondrial OS=Mus musculus GN=Pdhb PE=1 SV=1						22438000	11123000
sp|Q9D0M3|CY1_MOUSE	sp|Q9D0M3|CY1_MOUSE	sp|Q9D0M3|CY1_MOUSE Cytochrome c1, heme protein, mitochondrial OS=Mus musculus GN=Cyc1 PE=1 SV=1						40670000
sp|Q9D0M5|DYL2_MOUSE;tr|D6RIN4|D6RIN4_MOUSE;tr|Q9D6F6|Q9D6F6_MOUSE;tr|Q80ZS7|Q80ZS7_MOUSE;sp|P63168|DYL1_MOUSE	sp|Q9D0M5|DYL2_MOUSE;tr|D6RIN4|D6RIN4_MOUSE;tr|Q9D6F6|Q9D6F6_MOUSE;tr|Q80ZS7|Q80ZS7_MOUSE;sp|P63168|DYL1_MOUSE	sp|Q9D0M5|DYL2_MOUSE Dynein light chain 2, cytoplasmic OS=Mus musculus GN=Dynll2 PE=1 SV=1;tr|D6RIN4|D6RIN4_MOUSE Dynein light chain 2, cytoplasmic OS=Mus musculus GN=Dynll2 PE=1 SV=1;tr|Q9D6F6|Q9D6F6_MOUSE Uncharacterized protein OS=Mus musculus GN=Dynll1							21996000
sp|Q9D172|ES1_MOUSE;tr|A0A1W2P7B6|A0A1W2P7B6_MOUSE;tr|A0A1W2P870|A0A1W2P870_MOUSE	sp|Q9D172|ES1_MOUSE;tr|A0A1W2P7B6|A0A1W2P7B6_MOUSE	sp|Q9D172|ES1_MOUSE ES1 protein homolog, mitochondrial OS=Mus musculus GN=D10Jhu81e PE=1 SV=1;tr|A0A1W2P7B6|A0A1W2P7B6_MOUSE ES1 protein homolog, mitochondrial (Fragment) OS=Mus musculus GN=D10Jhu81e PE=1 SV=1	32112000				84051000	56250000	45196000	25661000	23395000		24360000
sp|Q9D1A2|CNDP2_MOUSE;tr|Q6KAT3|Q6KAT3_MOUSE;tr|Q3TG71|Q3TG71_MOUSE	sp|Q9D1A2|CNDP2_MOUSE;tr|Q6KAT3|Q6KAT3_MOUSE	sp|Q9D1A2|CNDP2_MOUSE Cytosolic non-specific dipeptidase OS=Mus musculus GN=Cndp2 PE=1 SV=1;tr|Q6KAT3|Q6KAT3_MOUSE MFLJ00064 protein (Fragment) OS=Mus musculus GN=Cndp2 PE=2 SV=1					35711000	41061000
sp|Q9D2G2|ODO2_MOUSE	sp|Q9D2G2|ODO2_MOUSE	sp|Q9D2G2|ODO2_MOUSE Dihydrolipoyllysine-residue succinyltransferase component of 2-oxoglutarate dehydrogenase complex, mitochondrial OS=Mus musculus GN=Dlst PE=1 SV=1						62974000
sp|Q9D3I6|KRA71_MOUSE	sp|Q9D3I6|KRA71_MOUSE	sp|Q9D3I6|KRA71_MOUSE Keratin-associated protein 7-1 OS=Mus musculus GN=Krtap7-1 PE=3 SV=1					1992300000
sp|Q9D646|KRT34_MOUSE;CON__Q9D646	sp|Q9D646|KRT34_MOUSE;CON__Q9D646	sp|Q9D646|KRT34_MOUSE Keratin, type I cuticular Ha4 OS=Mus musculus GN=Krt34 PE=2 SV=1;					2741100000	105100000	69155000
sp|Q9D6F9|TBB4A_MOUSE	sp|Q9D6F9|TBB4A_MOUSE	sp|Q9D6F9|TBB4A_MOUSE Tubulin beta-4A chain OS=Mus musculus GN=Tubb4a PE=1 SV=3											27317000
sp|Q9D6J6|NDUV2_MOUSE;tr|M0QWP9|M0QWP9_MOUSE	sp|Q9D6J6|NDUV2_MOUSE	sp|Q9D6J6|NDUV2_MOUSE NADH dehydrogenase [ubiquinone] flavoprotein 2, mitochondrial OS=Mus musculus GN=Ndufv2 PE=1 SV=2					18331000
sp|Q9D6R2|IDH3A_MOUSE;tr|A0A1L1STE6|A0A1L1STE6_MOUSE	sp|Q9D6R2|IDH3A_MOUSE;tr|A0A1L1STE6|A0A1L1STE6_MOUSE	sp|Q9D6R2|IDH3A_MOUSE Isocitrate dehydrogenase [NAD] subunit alpha, mitochondrial OS=Mus musculus GN=Idh3a PE=1 SV=1;tr|A0A1L1STE6|A0A1L1STE6_MOUSE Isocitrate dehydrogenase [NAD] subunit, mitochondrial OS=Mus musculus GN=Idh3a PE=1 SV=1					68445000	62098000
sp|Q9DAK9|PHP14_MOUSE	sp|Q9DAK9|PHP14_MOUSE	sp|Q9DAK9|PHP14_MOUSE 14 kDa phosphohistidine phosphatase OS=Mus musculus GN=Phpt1 PE=1 SV=1	238745000	99870000	68583000	77361000	165190000	100760000	169240000	101920000	50256000	78947000	117520000	140990000
sp|Q9DB77|QCR2_MOUSE;tr|A0A140LI98|A0A140LI98_MOUSE	sp|Q9DB77|QCR2_MOUSE	sp|Q9DB77|QCR2_MOUSE Cytochrome b-c1 complex subunit 2, mitochondrial OS=Mus musculus GN=Uqcrc2 PE=1 SV=1	22362000				217830000	191700000	75890000				18492000
sp|Q9DBB8|DHDH_MOUSE;tr|Q8K0E9|Q8K0E9_MOUSE;tr|A0A1B0GSH8|A0A1B0GSH8_MOUSE	sp|Q9DBB8|DHDH_MOUSE;tr|Q8K0E9|Q8K0E9_MOUSE;tr|A0A1B0GSH8|A0A1B0GSH8_MOUSE	sp|Q9DBB8|DHDH_MOUSE Trans-1,2-dihydrobenzene-1,2-diol dehydrogenase OS=Mus musculus GN=Dhdh PE=1 SV=1;tr|Q8K0E9|Q8K0E9_MOUSE Dhdh protein (Fragment) OS=Mus musculus GN=Dhdh PE=2 SV=1;tr|A0A1B0GSH8|A0A1B0GSH8_MOUSE Predicted gene 45808 (Fragment) OS=Mus mu	13607000				9270300		6481600
sp|Q9DBB9|CPN2_MOUSE;tr|Q642I5|Q642I5_MOUSE	sp|Q9DBB9|CPN2_MOUSE;tr|Q642I5|Q642I5_MOUSE	sp|Q9DBB9|CPN2_MOUSE Carboxypeptidase N subunit 2 OS=Mus musculus GN=Cpn2 PE=1 SV=2;tr|Q642I5|Q642I5_MOUSE Cpn2 protein (Fragment) OS=Mus musculus GN=Cpn2 PE=2 SV=1	82328000	54886000	73588000	52118000	71211000	75050000	52760000	97118000	66645000	110600000	89637000	86481000
sp|Q9DBD0|ICA_MOUSE;tr|Q8VC96|Q8VC96_MOUSE;tr|D3YY36|D3YY36_MOUSE;tr|F6W4D3|F6W4D3_MOUSE;tr|D3Z4X8|D3Z4X8_MOUSE	sp|Q9DBD0|ICA_MOUSE;tr|Q8VC96|Q8VC96_MOUSE;tr|D3YY36|D3YY36_MOUSE	sp|Q9DBD0|ICA_MOUSE Inhibitor of carbonic anhydrase OS=Mus musculus GN=Ica PE=1 SV=1;tr|Q8VC96|Q8VC96_MOUSE Uncharacterized protein OS=Mus musculus GN=1300017J02Rik PE=2 SV=1;tr|D3YY36|D3YY36_MOUSE RIKEN cDNA 1300017J02 gene OS=Mus musculus GN=1300017J02Ri	605505000	891580000	887620000	740530000	507700000	587630000	732020000	946120000	905150000	949130000	886610000	953280000
sp|Q9DBF1|AL7A1_MOUSE;tr|G3UY72|G3UY72_MOUSE;tr|G3UYR8|G3UYR8_MOUSE;tr|E9Q1H3|E9Q1H3_MOUSE	sp|Q9DBF1|AL7A1_MOUSE;tr|G3UY72|G3UY72_MOUSE;tr|G3UYR8|G3UYR8_MOUSE	sp|Q9DBF1|AL7A1_MOUSE Alpha-aminoadipic semialdehyde dehydrogenase OS=Mus musculus GN=Aldh7a1 PE=1 SV=4;tr|G3UY72|G3UY72_MOUSE Alpha-aminoadipic semialdehyde dehydrogenase (Fragment) OS=Mus musculus GN=Aldh7a1 PE=1 SV=1;tr|G3UYR8|G3UYR8_MOUSE Alpha-aminoad							24348000		21576000		36050000
sp|Q9DBH5|LMAN2_MOUSE	sp|Q9DBH5|LMAN2_MOUSE	sp|Q9DBH5|LMAN2_MOUSE Vesicular integral-membrane protein VIP36 OS=Mus musculus GN=Lman2 PE=1 SV=2		20977000		21727000
sp|Q9DC11|PXDC2_MOUSE;tr|B1AY85|B1AY85_MOUSE;tr|B1AY86|B1AY86_MOUSE	sp|Q9DC11|PXDC2_MOUSE;tr|B1AY85|B1AY85_MOUSE;tr|B1AY86|B1AY86_MOUSE	sp|Q9DC11|PXDC2_MOUSE Plexin domain-containing protein 2 OS=Mus musculus GN=Plxdc2 PE=1 SV=1;tr|B1AY85|B1AY85_MOUSE Plexin domain-containing protein 2 OS=Mus musculus GN=Plxdc2 PE=1 SV=1;tr|B1AY86|B1AY86_MOUSE Plexin domain-containing protein 2 OS=Mus musc									21819000
sp|Q9DCJ5|NDUA8_MOUSE;tr|A0A1S6GWI0|A0A1S6GWI0_MOUSE	sp|Q9DCJ5|NDUA8_MOUSE	sp|Q9DCJ5|NDUA8_MOUSE NADH dehydrogenase [ubiquinone] 1 alpha subcomplex subunit 8 OS=Mus musculus GN=Ndufa8 PE=1 SV=3						21013000
sp|Q9DCW4|ETFB_MOUSE;tr|A0A0U1RNP5|A0A0U1RNP5_MOUSE;tr|A0A0N4SVE0|A0A0N4SVE0_MOUSE;tr|A0A0U1RNR3|A0A0U1RNR3_MOUSE;tr|A0A0N4SWE9|A0A0N4SWE9_MOUSE;tr|A0A0U1RNK9|A0A0U1RNK9_MOUSE;tr|A0A0U1RQB4|A0A0U1RQB4_MOUSE	sp|Q9DCW4|ETFB_MOUSE;tr|A0A0U1RNP5|A0A0U1RNP5_MOUSE;tr|A0A0N4SVE0|A0A0N4SVE0_MOUSE;tr|A0A0U1RNR3|A0A0U1RNR3_MOUSE;tr|A0A0N4SWE9|A0A0N4SWE9_MOUSE	sp|Q9DCW4|ETFB_MOUSE Electron transfer flavoprotein subunit beta OS=Mus musculus GN=Etfb PE=1 SV=3;tr|A0A0U1RNP5|A0A0U1RNP5_MOUSE Electron transfer flavoprotein subunit beta (Fragment) OS=Mus musculus GN=Etfb PE=4 SV=1;tr|A0A0N4SVE0|A0A0N4SVE0_MOUSE Predic					81117000	91761000	56465000
sp|Q9DCZ1|GMPR1_MOUSE;tr|F6VY18|F6VY18_MOUSE	sp|Q9DCZ1|GMPR1_MOUSE;tr|F6VY18|F6VY18_MOUSE	sp|Q9DCZ1|GMPR1_MOUSE GMP reductase 1 OS=Mus musculus GN=Gmpr PE=1 SV=1;tr|F6VY18|F6VY18_MOUSE GMP reductase 1 (Fragment) OS=Mus musculus GN=Gmpr PE=1 SV=1	2501100
sp|Q9DD06|RARR2_MOUSE	sp|Q9DD06|RARR2_MOUSE	sp|Q9DD06|RARR2_MOUSE Retinoic acid receptor responder protein 2 OS=Mus musculus GN=Rarres2 PE=1 SV=1		24714000	24184000	47486000		32492000	29900000	19838000	34093000			14134000
sp|Q9EPL2|CSTN1_MOUSE	sp|Q9EPL2|CSTN1_MOUSE	sp|Q9EPL2|CSTN1_MOUSE Calsyntenin-1 OS=Mus musculus GN=Clstn1 PE=1 SV=1	63773000	343120000	357010000	487710000	118220000	242260000	168630000	213950000	308850000	158340000	125140000	157350000
sp|Q9EQ21|HEPC_MOUSE	sp|Q9EQ21|HEPC_MOUSE	sp|Q9EQ21|HEPC_MOUSE Hepcidin OS=Mus musculus GN=Hamp PE=2 SV=1					4697700
sp|Q9EQG7|ENPP5_MOUSE;tr|Q5DTL0|Q5DTL0_MOUSE;tr|Q5FWJ8|Q5FWJ8_MOUSE	sp|Q9EQG7|ENPP5_MOUSE;tr|Q5DTL0|Q5DTL0_MOUSE;tr|Q5FWJ8|Q5FWJ8_MOUSE	sp|Q9EQG7|ENPP5_MOUSE Ectonucleotide pyrophosphatase/phosphodiesterase family member 5 OS=Mus musculus GN=Enpp5 PE=1 SV=3;tr|Q5DTL0|Q5DTL0_MOUSE MKIAA4152 protein (Fragment) OS=Mus musculus GN=Enpp5 PE=2 SV=1;tr|Q5FWJ8|Q5FWJ8_MOUSE Enpp5 protein (Fragment)	46052000	45426000	43643000	49571000		36256000	24208000	35462000			27692000	36962000
sp|Q9ER58|TICN2_MOUSE;tr|Q6PAN0|Q6PAN0_MOUSE;tr|F6SLR4|F6SLR4_MOUSE;tr|Q80U51|Q80U51_MOUSE	sp|Q9ER58|TICN2_MOUSE;tr|Q6PAN0|Q6PAN0_MOUSE;tr|F6SLR4|F6SLR4_MOUSE;tr|Q80U51|Q80U51_MOUSE	sp|Q9ER58|TICN2_MOUSE Testican-2 OS=Mus musculus GN=Spock2 PE=1 SV=1;tr|Q6PAN0|Q6PAN0_MOUSE Spock2 protein OS=Mus musculus GN=Spock2 PE=2 SV=1;tr|F6SLR4|F6SLR4_MOUSE Testican-2 OS=Mus musculus GN=Spock2 PE=1 SV=1;tr|Q80U51|Q80U51_MOUSE MKIAA0275 protein (F	60386000	154860000	140520000	173150000	97330000	139740000	110620000	109270000	171810000	97395000	83455000
sp|Q9ERD7|TBB3_MOUSE;tr|Q9CRT0|Q9CRT0_MOUSE;tr|A0A1D5RM76|A0A1D5RM76_MOUSE;tr|D5MR34|D5MR34_MOUSE	sp|Q9ERD7|TBB3_MOUSE;tr|Q9CRT0|Q9CRT0_MOUSE	sp|Q9ERD7|TBB3_MOUSE Tubulin beta-3 chain OS=Mus musculus GN=Tubb3 PE=1 SV=1;tr|Q9CRT0|Q9CRT0_MOUSE Uncharacterized protein (Fragment) OS=Mus musculus GN=Tubb3 PE=2 SV=1										37547000
sp|Q9ESB3|HRG_MOUSE;tr|A0A0R4J039|A0A0R4J039_MOUSE	sp|Q9ESB3|HRG_MOUSE;tr|A0A0R4J039|A0A0R4J039_MOUSE	sp|Q9ESB3|HRG_MOUSE Histidine-rich glycoprotein OS=Mus musculus GN=Hrg PE=1 SV=2;tr|A0A0R4J039|A0A0R4J039_MOUSE Histidine-rich glycoprotein OS=Mus musculus GN=Hrg PE=1 SV=1	294565000	659400000	652460000	627630000	601610000	569070000	752390000	825870000	768230000	668360000	668480000	737800000
sp|Q9ET22|DPP2_MOUSE	sp|Q9ET22|DPP2_MOUSE	sp|Q9ET22|DPP2_MOUSE Dipeptidyl peptidase 2 OS=Mus musculus GN=Dpp7 PE=1 SV=2
sp|Q9JHH6|CBPB2_MOUSE	sp|Q9JHH6|CBPB2_MOUSE	sp|Q9JHH6|CBPB2_MOUSE Carboxypeptidase B2 OS=Mus musculus GN=Cpb2 PE=1 SV=1									27184000
sp|Q9JHI5|IVD_MOUSE	sp|Q9JHI5|IVD_MOUSE	sp|Q9JHI5|IVD_MOUSE Isovaleryl-CoA dehydrogenase, mitochondrial OS=Mus musculus GN=Ivd PE=1 SV=1					19220000
sp|Q9JHU9|INO1_MOUSE	sp|Q9JHU9|INO1_MOUSE	sp|Q9JHU9|INO1_MOUSE Inositol-3-phosphate synthase 1 OS=Mus musculus GN=Isyna1 PE=1 SV=1						4582900
sp|Q9JHW2|NIT2_MOUSE	sp|Q9JHW2|NIT2_MOUSE	sp|Q9JHW2|NIT2_MOUSE Omega-amidase NIT2 OS=Mus musculus GN=Nit2 PE=1 SV=1	25050000
sp|Q9JJN5|CBPN_MOUSE;CON__Q2KJ83	sp|Q9JJN5|CBPN_MOUSE	sp|Q9JJN5|CBPN_MOUSE Carboxypeptidase N catalytic chain OS=Mus musculus GN=Cpn1 PE=1 SV=1										85440000
sp|Q9JJV2|PROF2_MOUSE;tr|D3YWS3|D3YWS3_MOUSE	sp|Q9JJV2|PROF2_MOUSE;tr|D3YWS3|D3YWS3_MOUSE	sp|Q9JJV2|PROF2_MOUSE Profilin-2 OS=Mus musculus GN=Pfn2 PE=1 SV=3;tr|D3YWS3|D3YWS3_MOUSE Profilin OS=Mus musculus GN=Pfn2 PE=1 SV=1							7364100
sp|Q9JKC6|CEND_MOUSE	sp|Q9JKC6|CEND_MOUSE	sp|Q9JKC6|CEND_MOUSE Cell cycle exit and neuronal differentiation protein 1 OS=Mus musculus GN=Cend1 PE=1 SV=1											6333400
sp|Q9JMH6|TRXR1_MOUSE;tr|Q91Y95|Q91Y95_MOUSE;tr|Q91Y98|Q91Y98_MOUSE;tr|Q9D8I4|Q9D8I4_MOUSE;tr|A0A0U1RPS1|A0A0U1RPS1_MOUSE;tr|A0A1W2P6U1|A0A1W2P6U1_MOUSE;tr|A0A0U1RPC6|A0A0U1RPC6_MOUSE;tr|A0A0M3HEP9|A0A0M3HEP9_MOUSE;tr|D3Z0K8|D3Z0K8_MOUSE;tr|J3QMN4|J3QMN4_MOUSE;tr|A0A0U1RPV8|A0A0U1RPV8_MOUSE;tr|A0A0U1RQA4|A0A0U1RQA4_MOUSE;tr|J3QMQ8|J3QMQ8_MOUSE;sp|Q9JLT4|TRXR2_MOUSE;tr|A0A0M3HEQ0|A0A0M3HEQ0_MOUSE	sp|Q9JMH6|TRXR1_MOUSE;tr|Q91Y95|Q91Y95_MOUSE	sp|Q9JMH6|TRXR1_MOUSE Thioredoxin reductase 1, cytoplasmic OS=Mus musculus GN=Txnrd1 PE=1 SV=3;tr|Q91Y95|Q91Y95_MOUSE Thioredoxin reductase 1 (Fragment) OS=Mus musculus GN=Txnrd1 PE=4 SV=1						11566000
sp|Q9QUM9|PSA6_MOUSE;tr|E0CXB1|E0CXB1_MOUSE	sp|Q9QUM9|PSA6_MOUSE;tr|E0CXB1|E0CXB1_MOUSE	sp|Q9QUM9|PSA6_MOUSE Proteasome subunit alpha type-6 OS=Mus musculus GN=Psma6 PE=1 SV=1;tr|E0CXB1|E0CXB1_MOUSE Proteasome endopeptidase complex OS=Mus musculus GN=Psma6 PE=1 SV=1	35817500				29446000	40364000	27017000	29735000		41505000	36884000	33008000
sp|Q9QUN9|DKK3_MOUSE	sp|Q9QUN9|DKK3_MOUSE	sp|Q9QUN9|DKK3_MOUSE Dickkopf-related protein 3 OS=Mus musculus GN=Dkk3 PE=2 SV=1	659580000	1136100000	1065800000	1395800000	468850000	748330000	660140000	617840000	904300000	590900000	564750000	660520000
sp|Q9QUR8|SEM7A_MOUSE	sp|Q9QUR8|SEM7A_MOUSE	sp|Q9QUR8|SEM7A_MOUSE Semaphorin-7A OS=Mus musculus GN=Sema7a PE=1 SV=1	67950000	126880000	153070000	121520000	50177000	105860000	81907000	98017000	108970000	94971000	90020000	103600000
sp|Q9QWK4|CD5L_MOUSE	sp|Q9QWK4|CD5L_MOUSE	sp|Q9QWK4|CD5L_MOUSE CD5 antigen-like OS=Mus musculus GN=Cd5l PE=1 SV=3	154425000	56302000			58026000	75056000	46608000	90810000	90298000		118740000	82600000
sp|Q9QXV0|PCSK1_MOUSE	sp|Q9QXV0|PCSK1_MOUSE	sp|Q9QXV0|PCSK1_MOUSE ProSAAS OS=Mus musculus GN=Pcsk1n PE=1 SV=2	1612950000	2960100000	2256400000	4171900000	2627400000	3759600000	2754300000	2252600000	2546000000	1268500000	2417300000	1940400000
sp|Q9QY42|GPR37_MOUSE	sp|Q9QY42|GPR37_MOUSE	sp|Q9QY42|GPR37_MOUSE Prosaposin receptor GPR37 OS=Mus musculus GN=Gpr37 PE=2 SV=1		105290000	120220000	126500000	64018000	113330000	78498000	70541000	90082000		58031000	53996000
sp|Q9QYG0|NDRG2_MOUSE;tr|Q8CGR9|Q8CGR9_MOUSE	sp|Q9QYG0|NDRG2_MOUSE;tr|Q8CGR9|Q8CGR9_MOUSE	sp|Q9QYG0|NDRG2_MOUSE Protein NDRG2 OS=Mus musculus GN=Ndrg2 PE=1 SV=1;tr|Q8CGR9|Q8CGR9_MOUSE NDR2 (Fragment) OS=Mus musculus GN=Ndr2 PE=4 SV=1	171620000	95789000			99683000	107650000	132430000	54707000		89530000	149080000	118630000
sp|Q9QZU5|KR151_MOUSE;tr|F6Z3P4|F6Z3P4_MOUSE	sp|Q9QZU5|KR151_MOUSE	sp|Q9QZU5|KR151_MOUSE Keratin-associated protein 15-1 OS=Mus musculus GN=Krtap15-1 PE=2 SV=1					1046400000
sp|Q9QZZ6|DERM_MOUSE	sp|Q9QZZ6|DERM_MOUSE	sp|Q9QZZ6|DERM_MOUSE Dermatopontin OS=Mus musculus GN=Dpt PE=1 SV=1			109580000		171580000		138420000	115850000	108980000
sp|Q9R062|GLYG_MOUSE;tr|V9GX26|V9GX26_MOUSE;tr|K3W4S6|K3W4S6_MOUSE	sp|Q9R062|GLYG_MOUSE;tr|V9GX26|V9GX26_MOUSE;tr|K3W4S6|K3W4S6_MOUSE	sp|Q9R062|GLYG_MOUSE Glycogenin-1 OS=Mus musculus GN=Gyg1 PE=1 SV=3;tr|V9GX26|V9GX26_MOUSE Glycogenin (Fragment) OS=Mus musculus GN=Gyg PE=1 SV=1;tr|K3W4S6|K3W4S6_MOUSE Glycogenin OS=Mus musculus GN=Gyg PE=1 SV=1						9722100
sp|Q9R0P3|ESTD_MOUSE;tr|H3BKH6|H3BKH6_MOUSE;tr|H3BJP2|H3BJP2_MOUSE;tr|H3BLJ9|H3BLJ9_MOUSE;tr|H3BJL6|H3BJL6_MOUSE;tr|H3BK43|H3BK43_MOUSE;tr|H3BJC6|H3BJC6_MOUSE;tr|H3BL99|H3BL99_MOUSE	sp|Q9R0P3|ESTD_MOUSE;tr|H3BKH6|H3BKH6_MOUSE;tr|H3BJP2|H3BJP2_MOUSE;tr|H3BLJ9|H3BLJ9_MOUSE;tr|H3BJL6|H3BJL6_MOUSE;tr|H3BK43|H3BK43_MOUSE	sp|Q9R0P3|ESTD_MOUSE S-formylglutathione hydrolase OS=Mus musculus GN=Esd PE=1 SV=1;tr|H3BKH6|H3BKH6_MOUSE S-formylglutathione hydrolase OS=Mus musculus GN=Esd PE=1 SV=1;tr|H3BJP2|H3BJP2_MOUSE S-formylglutathione hydrolase (Fragment) OS=Mus musculus GN=Esd	109845000	57496000			102010000	85974000	83452000			78239000	68726000	83041000
sp|Q9R0P9|UCHL1_MOUSE;tr|Q3TCH2|Q3TCH2_MOUSE;tr|I7ENE7|I7ENE7_MOUSE	sp|Q9R0P9|UCHL1_MOUSE;tr|Q3TCH2|Q3TCH2_MOUSE;tr|I7ENE7|I7ENE7_MOUSE	sp|Q9R0P9|UCHL1_MOUSE Ubiquitin carboxyl-terminal hydrolase isozyme L1 OS=Mus musculus GN=Uchl1 PE=1 SV=1;tr|Q3TCH2|Q3TCH2_MOUSE Ubiquitin carboxyl-terminal hydrolase (Fragment) OS=Mus musculus GN=Uchl1 PE=2 SV=1;tr|I7ENE7|I7ENE7_MOUSE Ubiquitin carboxyl-t	48747000				236430000	76744000	89675000	43527000		260040000	259780000	155070000
sp|Q9R0Y5|KAD1_MOUSE;tr|Z4YN97|Z4YN97_MOUSE;tr|A0A0A6YXW8|A0A0A6YXW8_MOUSE	sp|Q9R0Y5|KAD1_MOUSE	sp|Q9R0Y5|KAD1_MOUSE Adenylate kinase isoenzyme 1 OS=Mus musculus GN=Ak1 PE=1 SV=1	2964950000	1454600000	843450000	861090000	1766400000	1425400000	2540000000	822820000	1086500000	930220000	1430500000	1745000000
sp|Q9R1E6|ENPP2_MOUSE;tr|G3UXY9|G3UXY9_MOUSE	sp|Q9R1E6|ENPP2_MOUSE;tr|G3UXY9|G3UXY9_MOUSE	sp|Q9R1E6|ENPP2_MOUSE Ectonucleotide pyrophosphatase/phosphodiesterase family member 2 OS=Mus musculus GN=Enpp2 PE=1 SV=3;tr|G3UXY9|G3UXY9_MOUSE Ectonucleotide pyrophosphatase/phosphodiesterase family member 2 OS=Mus musculus GN=Enpp2 PE=1 SV=1	10743500000	23510000000	25661000000	25332000000	13916000000	18394000000	18314000000	19699000000	22380000000	14646000000	18733000000	22209000000
sp|Q9R1P0|PSA4_MOUSE;tr|E9PW69|E9PW69_MOUSE;tr|Q3TL95|Q3TL95_MOUSE;tr|Q3UCF0|Q3UCF0_MOUSE;tr|E9Q0X0|E9Q0X0_MOUSE	sp|Q9R1P0|PSA4_MOUSE;tr|E9PW69|E9PW69_MOUSE;tr|Q3TL95|Q3TL95_MOUSE;tr|Q3UCF0|Q3UCF0_MOUSE;tr|E9Q0X0|E9Q0X0_MOUSE	sp|Q9R1P0|PSA4_MOUSE Proteasome subunit alpha type-4 OS=Mus musculus GN=Psma4 PE=1 SV=1;tr|E9PW69|E9PW69_MOUSE Proteasome subunit alpha type (Fragment) OS=Mus musculus GN=Psma4 PE=1 SV=1;tr|Q3TL95|Q3TL95_MOUSE Proteasome subunit alpha type (Fragment) OS=Mu	18896000
sp|Q9R1P3|PSB2_MOUSE;tr|Q8BJX0|Q8BJX0_MOUSE	sp|Q9R1P3|PSB2_MOUSE;tr|Q8BJX0|Q8BJX0_MOUSE	sp|Q9R1P3|PSB2_MOUSE Proteasome subunit beta type-2 OS=Mus musculus GN=Psmb2 PE=1 SV=1;tr|Q8BJX0|Q8BJX0_MOUSE Proteasome subunit beta type OS=Mus musculus GN=Psmb2 PE=2 SV=1						19350000					17173000
sp|Q9WUB3|PYGM_MOUSE;tr|E9PUM3|E9PUM3_MOUSE;tr|Q9CTZ0|Q9CTZ0_MOUSE;tr|Q91WP9|Q91WP9_MOUSE;tr|Q3TJQ7|Q3TJQ7_MOUSE;sp|Q9ET01|PYGL_MOUSE;tr|Q3UEJ6|Q3UEJ6_MOUSE;tr|Q8BLV0|Q8BLV0_MOUSE	sp|Q9WUB3|PYGM_MOUSE;tr|E9PUM3|E9PUM3_MOUSE	sp|Q9WUB3|PYGM_MOUSE Glycogen phosphorylase, muscle form OS=Mus musculus GN=Pygm PE=1 SV=3;tr|E9PUM3|E9PUM3_MOUSE Alpha-1,4 glucan phosphorylase OS=Mus musculus GN=Pygm PE=1 SV=1	7281600000	4131100000	2164600000	1831600000	3232300000	4205500000	3875500000	1609200000	1891400000	2074400000	5020800000	2989100000
sp|Q9WUM5|SUCA_MOUSE;tr|A0A0N4SVU4|A0A0N4SVU4_MOUSE	sp|Q9WUM5|SUCA_MOUSE;tr|A0A0N4SVU4|A0A0N4SVU4_MOUSE	sp|Q9WUM5|SUCA_MOUSE Succinate--CoA ligase [ADP/GDP-forming] subunit alpha, mitochondrial OS=Mus musculus GN=Suclg1 PE=1 SV=4;tr|A0A0N4SVU4|A0A0N4SVU4_MOUSE Succinate--CoA ligase [ADP/GDP-forming] subunit alpha, mitochondrial (Fragment) OS=Mus musculus GN=						32954000
sp|Q9WV35|ABEC2_MOUSE	sp|Q9WV35|ABEC2_MOUSE	sp|Q9WV35|ABEC2_MOUSE C->U-editing enzyme APOBEC-2 OS=Mus musculus GN=Apobec2 PE=1 SV=1	74963000				50448000	22316000	36259000					41284000
sp|Q9WVA4|TAGL2_MOUSE;tr|A0A0A6YXG6|A0A0A6YXG6_MOUSE;tr|Q8BT95|Q8BT95_MOUSE;sp|Q9R1Q8|TAGL3_MOUSE	sp|Q9WVA4|TAGL2_MOUSE	sp|Q9WVA4|TAGL2_MOUSE Transgelin-2 OS=Mus musculus GN=Tagln2 PE=1 SV=4	98279500				172570000	58293000	136970000		54158000	35634000		29728000
sp|Q9WVH9|FBLN5_MOUSE;tr|A0A1Y7VJW9|A0A1Y7VJW9_MOUSE	sp|Q9WVH9|FBLN5_MOUSE;tr|A0A1Y7VJW9|A0A1Y7VJW9_MOUSE	sp|Q9WVH9|FBLN5_MOUSE Fibulin-5 OS=Mus musculus GN=Fbln5 PE=1 SV=1;tr|A0A1Y7VJW9|A0A1Y7VJW9_MOUSE Fibulin-5 OS=Mus musculus GN=Fbln5 PE=1 SV=1		19822000							16048000
sp|Q9WVJ3|CBPQ_MOUSE;tr|Q3U496|Q3U496_MOUSE;tr|Q9R1I4|Q9R1I4_MOUSE	sp|Q9WVJ3|CBPQ_MOUSE	sp|Q9WVJ3|CBPQ_MOUSE Carboxypeptidase Q OS=Mus musculus GN=Cpq PE=1 SV=1	125180000	124780000	137900000	140040000	93438000	114440000	98938000	93412000	131810000	103890000	109510000	118630000
sp|Q9Z1W8|AT12A_MOUSE	sp|Q9Z1W8|AT12A_MOUSE	sp|Q9Z1W8|AT12A_MOUSE Potassium-transporting ATPase alpha chain 2 OS=Mus musculus GN=Atp12a PE=1 SV=3											13695000
sp|Q9Z2I9|SUCB1_MOUSE;tr|Q3UCC6|Q3UCC6_MOUSE;tr|Q3U6C7|Q3U6C7_MOUSE;tr|Q05BC6|Q05BC6_MOUSE	sp|Q9Z2I9|SUCB1_MOUSE;tr|Q3UCC6|Q3UCC6_MOUSE;tr|Q3U6C7|Q3U6C7_MOUSE;tr|Q05BC6|Q05BC6_MOUSE	sp|Q9Z2I9|SUCB1_MOUSE Succinate--CoA ligase [ADP-forming] subunit beta, mitochondrial OS=Mus musculus GN=Sucla2 PE=1 SV=2;tr|Q3UCC6|Q3UCC6_MOUSE Succinate-CoA ligase subunit beta (Fragment) OS=Mus musculus GN=Sucla2 PE=2 SV=1;tr|Q3U6C7|Q3U6C7_MOUSE Succina						3943400
sp|Q9Z2L6|MINP1_MOUSE;tr|Q8C9C2|Q8C9C2_MOUSE	sp|Q9Z2L6|MINP1_MOUSE;tr|Q8C9C2|Q8C9C2_MOUSE	sp|Q9Z2L6|MINP1_MOUSE Multiple inositol polyphosphate phosphatase 1 OS=Mus musculus GN=Minpp1 PE=1 SV=3;tr|Q8C9C2|Q8C9C2_MOUSE Uncharacterized protein (Fragment) OS=Mus musculus GN=Minpp1 PE=2 SV=2		16400000					12594000					11936000
sp|Q9Z2T6|KRT85_MOUSE	sp|Q9Z2T6|KRT85_MOUSE	sp|Q9Z2T6|KRT85_MOUSE Keratin, type II cuticular Hb5 OS=Mus musculus GN=Krt85 PE=1 SV=2					664070000
tr|A0A068WAZ7|A0A068WAZ7_MOUSE;tr|A2A839|A2A839_MOUSE;tr|A2A838|A2A838_MOUSE;tr|A2AD32|A2AD32_MOUSE;tr|A0A068WAQ5|A0A068WAQ5_MOUSE;sp|P48193|41_MOUSE;tr|A2A841|A2A841_MOUSE;tr|B6ZHC8|B6ZHC8_MOUSE;tr|Q3UH12|Q3UH12_MOUSE;tr|A2A842|A2A842_MOUSE;tr|A0A1D5RLV1|A0A1D5RLV1_MOUSE;tr|F7BUB8|F7BUB8_MOUSE;tr|F6S4K9|F6S4K9_MOUSE	tr|A0A068WAZ7|A0A068WAZ7_MOUSE;tr|A2A839|A2A839_MOUSE;tr|A2A838|A2A838_MOUSE;tr|A2AD32|A2AD32_MOUSE;tr|A0A068WAQ5|A0A068WAQ5_MOUSE;sp|P48193|41_MOUSE;tr|A2A841|A2A841_MOUSE;tr|B6ZHC8|B6ZHC8_MOUSE;tr|Q3UH12|Q3UH12_MOUSE;tr|A2A842|A2A842_MOUSE;tr|A0A1D5RLV1|A0A1D5RLV1_MOUSE	tr|A0A068WAZ7|A0A068WAZ7_MOUSE Protein 4.1R (Fragment) OS=Mus musculus GN=Epb41 PE=2 SV=1;tr|A2A839|A2A839_MOUSE Protein 4.1 OS=Mus musculus GN=Epb41 PE=1 SV=1;tr|A2A838|A2A838_MOUSE Protein 4.1 (Fragment) OS=Mus musculus GN=Epb41 PE=1 SV=1;tr|A2AD32|A2AD3	86578500									172630000	66992000	100310000
tr|A0A075B5J9|A0A075B5J9_MOUSE;tr|A0A075B5K3|A0A075B5K3_MOUSE;tr|A0A0G2JFA8|A0A0G2JFA8_MOUSE;tr|A0A0G2JDN5|A0A0G2JDN5_MOUSE	tr|A0A075B5J9|A0A075B5J9_MOUSE;tr|A0A075B5K3|A0A075B5K3_MOUSE;tr|A0A0G2JFA8|A0A0G2JFA8_MOUSE;tr|A0A0G2JDN5|A0A0G2JDN5_MOUSE	tr|A0A075B5J9|A0A075B5J9_MOUSE Immunoglobulin kappa variable 17-127 OS=Mus musculus GN=Igkv17-127 PE=4 SV=7;tr|A0A075B5K3|A0A075B5K3_MOUSE Immunoglobulin kappa variable 17-121 OS=Mus musculus GN=Igkv17-121 PE=4 SV=7;tr|A0A0G2JFA8|A0A0G2JFA8_MOUSE Immunoglo	123770000				155670000
tr|A0A075B5K2|A0A075B5K2_MOUSE;tr|A0A0G2JDR3|A0A0G2JDR3_MOUSE	tr|A0A075B5K2|A0A075B5K2_MOUSE;tr|A0A0G2JDR3|A0A0G2JDR3_MOUSE	tr|A0A075B5K2|A0A075B5K2_MOUSE Immunoglobulin kappa chain variable 9-124 OS=Mus musculus GN=Igkv9-124 PE=1 SV=7;tr|A0A0G2JDR3|A0A0G2JDR3_MOUSE Immunoglobulin kappa chain variable 9-124 (Fragment) OS=Mus musculus GN=Igkv9-124 PE=1 SV=4					33951000		16522000
tr|A0A075B5M7|A0A075B5M7_MOUSE;tr|A0A0M4KPD8|A0A0M4KPD8_MOUSE;tr|A0A0G2JDV4|A0A0G2JDV4_MOUSE;tr|A0A0B4J1J1|A0A0B4J1J1_MOUSE;tr|Q65ZI1|Q65ZI1_MOUSE	tr|A0A075B5M7|A0A075B5M7_MOUSE;tr|A0A0M4KPD8|A0A0M4KPD8_MOUSE;tr|A0A0G2JDV4|A0A0G2JDV4_MOUSE	tr|A0A075B5M7|A0A075B5M7_MOUSE Immunoglobulin kappa variable 5-39 OS=Mus musculus GN=Igkv5-39 PE=1 SV=7;tr|A0A0M4KPD8|A0A0M4KPD8_MOUSE B2 12-1 anti-human butyrylcholinesterase (BChE) light chain variable region (Fragment) OS=Mus musculus PE=2 SV=1;tr|A0A0G	418755000		149900000	183990000	321600000	627150000	281410000	518880000	203270000			832140000
tr|A0A075B5N4|A0A075B5N4_MOUSE;tr|A0N262|A0N262_MOUSE;tr|A0A0G2JF28|A0A0G2JF28_MOUSE	tr|A0A075B5N4|A0A075B5N4_MOUSE;tr|A0N262|A0N262_MOUSE;tr|A0A0G2JF28|A0A0G2JF28_MOUSE	tr|A0A075B5N4|A0A075B5N4_MOUSE Immunoglobulin kappa chain variable 8-27 OS=Mus musculus GN=Igkv8-27 PE=4 SV=1;tr|A0N262|A0N262_MOUSE Vk protein (Fragment) OS=Mus musculus GN=Vk PE=1 SV=1;tr|A0A0G2JF28|A0A0G2JF28_MOUSE Immunoglobulin kappa chain variable 8-				202270000		56744000		49039000			232570000	49942000
tr|A0A075B5N7|A0A075B5N7_MOUSE;tr|A0A0G2JGY3|A0A0G2JGY3_MOUSE;tr|A0A140T8P1|A0A140T8P1_MOUSE;tr|A2NUE7|A2NUE7_MOUSE	tr|A0A075B5N7|A0A075B5N7_MOUSE;tr|A0A0G2JGY3|A0A0G2JGY3_MOUSE	tr|A0A075B5N7|A0A075B5N7_MOUSE Immunoglobulin kappa variable 6-13 OS=Mus musculus GN=Igkv6-13 PE=1 SV=7;tr|A0A0G2JGY3|A0A0G2JGY3_MOUSE Immunoglobulin kappa variable 6-13 (Fragment) OS=Mus musculus GN=Igkv6-13 PE=1 SV=4												7544300
tr|A0A075B5P3|A0A075B5P3_MOUSE;tr|A0A0A6YVP0|A0A0A6YVP0_MOUSE;tr|A0A0F7R1P3|A0A0F7R1P3_MOUSE;tr|A0A0F7QZE4|A0A0F7QZE4_MOUSE;tr|Q8R3H6|Q8R3H6_MOUSE;tr|Q569X1|Q569X1_MOUSE;sp|P01867|IGG2B_MOUSE;tr|Q5R3X7|Q5R3X7_MOUSE;tr|Q5R3X8|Q5R3X8_MOUSE;tr|Q5R3Y0|Q5R3Y0_MOUSE;tr|Q5R3X4|Q5R3X4_MOUSE;sp|P01863|GCAA_MOUSE;sp|P01865|GCAM_MOUSE	tr|A0A075B5P3|A0A075B5P3_MOUSE;tr|A0A0A6YVP0|A0A0A6YVP0_MOUSE;tr|A0A0F7R1P3|A0A0F7R1P3_MOUSE;tr|A0A0F7QZE4|A0A0F7QZE4_MOUSE;tr|Q8R3H6|Q8R3H6_MOUSE;tr|Q569X1|Q569X1_MOUSE;sp|P01867|IGG2B_MOUSE	tr|A0A075B5P3|A0A075B5P3_MOUSE Immunoglobulin heavy constant gamma 2B (Fragment) OS=Mus musculus GN=Ighg2b PE=1 SV=1;tr|A0A0A6YVP0|A0A0A6YVP0_MOUSE Immunoglobulin heavy constant gamma 2B (Fragment) OS=Mus musculus GN=Ighg2b PE=1 SV=2;tr|A0A0F7R1P3|A0A0F7R1	5183000000	1749100000	2258400000	2121200000	3272300000	3172000000	2175200000	3335700000	2485900000	2518800000	3853900000	2870600000
tr|A0A075B5P5|A0A075B5P5_MOUSE;sp|P03987|IGHG3_MOUSE;tr|A0A1Y7VJN6|A0A1Y7VJN6_MOUSE;tr|Q6KAM2|Q6KAM2_MOUSE	tr|A0A075B5P5|A0A075B5P5_MOUSE;sp|P03987|IGHG3_MOUSE;tr|A0A1Y7VJN6|A0A1Y7VJN6_MOUSE;tr|Q6KAM2|Q6KAM2_MOUSE	tr|A0A075B5P5|A0A075B5P5_MOUSE Immunoglobulin heavy constant gamma 3 (Fragment) OS=Mus musculus GN=Ighg3 PE=4 SV=1;sp|P03987|IGHG3_MOUSE Ig gamma-3 chain C region OS=Mus musculus PE=1 SV=2;tr|A0A1Y7VJN6|A0A1Y7VJN6_MOUSE Immunoglobulin heavy constant gamma	3558900000		706500000	655100000	328940000	103480000	405550000	733950000	925770000	1794700000	2637600000	1757400000
tr|A0A075B5P6|A0A075B5P6_MOUSE;sp|P01872|IGHM_MOUSE;tr|A0A075B6A0|A0A075B6A0_MOUSE	tr|A0A075B5P6|A0A075B5P6_MOUSE;sp|P01872|IGHM_MOUSE;tr|A0A075B6A0|A0A075B6A0_MOUSE	tr|A0A075B5P6|A0A075B5P6_MOUSE Ig mu chain C region (Fragment) OS=Mus musculus GN=Ighm PE=1 SV=1;sp|P01872|IGHM_MOUSE Ig mu chain C region OS=Mus musculus GN=Ighm PE=1 SV=2;tr|A0A075B6A0|A0A075B6A0_MOUSE Ig mu chain C region (Fragment) OS=Mus musculus GN=I	6007900000	5943700000	1739800000	4345600000	4057700000	9418600000	3191700000	4253600000	31374000000	2356600000	9300000000	4883000000
tr|A0A075B5R0|A0A075B5R0_MOUSE;tr|A0A0B4J1P4|A0A0B4J1P4_MOUSE;tr|K7U686|K7U686_MOUSE;tr|K7T9L3|K7T9L3_MOUSE	tr|A0A075B5R0|A0A075B5R0_MOUSE;tr|A0A0B4J1P4|A0A0B4J1P4_MOUSE;tr|K7U686|K7U686_MOUSE;tr|K7T9L3|K7T9L3_MOUSE	tr|A0A075B5R0|A0A075B5R0_MOUSE Immunoglobulin heavy variable 5-16 OS=Mus musculus GN=Ighv5-16 PE=1 SV=1;tr|A0A0B4J1P4|A0A0B4J1P4_MOUSE Immunoglobulin heavy variable 5-16 (Fragment) OS=Mus musculus GN=Ighv5-16 PE=1 SV=1;tr|K7U686|K7U686_MOUSE IgA heavy chai								42505000
tr|A0A075B5R5|A0A075B5R5_MOUSE;tr|X5J5L1|X5J5L1_MOUSE;tr|X5J4R8|X5J4R8_MOUSE	tr|A0A075B5R5|A0A075B5R5_MOUSE;tr|X5J5L1|X5J5L1_MOUSE;tr|X5J4R8|X5J4R8_MOUSE	tr|A0A075B5R5|A0A075B5R5_MOUSE Immunoglobulin heavy variable 4-1 (Fragment) OS=Mus musculus GN=Ighv4-1 PE=1 SV=7;tr|X5J5L1|X5J5L1_MOUSE IgM heavy chain VDJ region (Fragment) OS=Mus musculus PE=2 SV=1;tr|X5J4R8|X5J4R8_MOUSE IgM heavy chain VDJ region (Fragm	241890000		75334000		52615000		50234000			155110000
tr|A0A075B5V7|A0A075B5V7_MOUSE;tr|A0A0A6YXN5|A0A0A6YXN5_MOUSE	tr|A0A075B5V7|A0A075B5V7_MOUSE;tr|A0A0A6YXN5|A0A0A6YXN5_MOUSE	tr|A0A075B5V7|A0A075B5V7_MOUSE Immunoglobulin heavy variable V1-43 OS=Mus musculus GN=Ighv1-43 PE=4 SV=1;tr|A0A0A6YXN5|A0A0A6YXN5_MOUSE Immunoglobulin heavy variable V1-43 (Fragment) OS=Mus musculus GN=Ighv1-43 PE=4 SV=1					96493000	214570000			180740000			157900000
tr|A0A075B5Y1|A0A075B5Y1_MOUSE;tr|X5J5T7|X5J5T7_MOUSE;tr|X5J538|X5J538_MOUSE;tr|A2KTK4|A2KTK4_MOUSE;tr|A2KTK2|A2KTK2_MOUSE;tr|X5J5Q5|X5J5Q5_MOUSE;tr|X5J543|X5J543_MOUSE;tr|X5J4D4|X5J4D4_MOUSE;tr|X5J5M6|X5J5M6_MOUSE;tr|A0A0G2JGK2|A0A0G2JGK2_MOUSE;sp|P01750|HVM06_MOUSE;tr|K7TRE7|K7TRE7_MOUSE	tr|A0A075B5Y1|A0A075B5Y1_MOUSE;tr|X5J5T7|X5J5T7_MOUSE;tr|X5J538|X5J538_MOUSE;tr|A2KTK4|A2KTK4_MOUSE;tr|A2KTK2|A2KTK2_MOUSE;tr|X5J5Q5|X5J5Q5_MOUSE;tr|X5J543|X5J543_MOUSE;tr|X5J4D4|X5J4D4_MOUSE;tr|X5J5M6|X5J5M6_MOUSE;tr|A0A0G2JGK2|A0A0G2JGK2_MOUSE;sp|P01750|HVM06_MOUSE	tr|A0A075B5Y1|A0A075B5Y1_MOUSE Immunoglobulin heavy variable V1-74 OS=Mus musculus GN=Ighv1-74 PE=4 SV=1;tr|X5J5T7|X5J5T7_MOUSE IgM heavy chain VDJ region (Fragment) OS=Mus musculus PE=2 SV=1;tr|X5J538|X5J538_MOUSE IgG1 heavy chain VDJ region (Fragment) OS		23470000
tr|A0A075B5Y2|A0A075B5Y2_MOUSE	tr|A0A075B5Y2|A0A075B5Y2_MOUSE	tr|A0A075B5Y2|A0A075B5Y2_MOUSE Immunoglobulin heavy variable 1-75 (Fragment) OS=Mus musculus GN=Ighv1-75 PE=4 SV=1												84317000
tr|A0A075B674|A0A075B674_MOUSE;tr|A0A0G2JGN3|A0A0G2JGN3_MOUSE	tr|A0A075B674|A0A075B674_MOUSE;tr|A0A0G2JGN3|A0A0G2JGN3_MOUSE	tr|A0A075B674|A0A075B674_MOUSE Immunoglobulin heavy variable 1-78 OS=Mus musculus GN=Ighv1-78 PE=1 SV=1;tr|A0A0G2JGN3|A0A0G2JGN3_MOUSE Immunoglobulin heavy variable 1-78 (Fragment) OS=Mus musculus GN=Ighv1-78 PE=1 SV=1	344100000		39434000								22287000
tr|A0A075B677|A0A075B677_MOUSE;tr|A0A0G2JFC6|A0A0G2JFC6_MOUSE	tr|A0A075B677|A0A075B677_MOUSE;tr|A0A0G2JFC6|A0A0G2JFC6_MOUSE	tr|A0A075B677|A0A075B677_MOUSE Immunoglobulin kappa variable 4-53 OS=Mus musculus GN=Igkv4-53 PE=1 SV=1;tr|A0A0G2JFC6|A0A0G2JFC6_MOUSE Immunoglobulin kappa variable 4-53 (Fragment) OS=Mus musculus GN=Igkv4-53 PE=1 SV=1		89814000
tr|A0A075B680|A0A075B680_MOUSE;tr|X5J4R7|X5J4R7_MOUSE;tr|X5J4Z6|X5J4Z6_MOUSE;tr|A0A0G2JFL3|A0A0G2JFL3_MOUSE;tr|A0A0A6YXZ4|A0A0A6YXZ4_MOUSE;tr|K7TRR2|K7TRR2_MOUSE;tr|X5J4D7|X5J4D7_MOUSE;tr|K7TR77|K7TR77_MOUSE	tr|A0A075B680|A0A075B680_MOUSE;tr|X5J4R7|X5J4R7_MOUSE;tr|X5J4Z6|X5J4Z6_MOUSE;tr|A0A0G2JFL3|A0A0G2JFL3_MOUSE;tr|A0A0A6YXZ4|A0A0A6YXZ4_MOUSE;tr|K7TRR2|K7TRR2_MOUSE;tr|X5J4D7|X5J4D7_MOUSE	tr|A0A075B680|A0A075B680_MOUSE Immunoglobulin heavy variable 1-62-2 OS=Mus musculus GN=Ighv1-62-2 PE=4 SV=1;tr|X5J4R7|X5J4R7_MOUSE IgM heavy chain VDJ region (Fragment) OS=Mus musculus PE=2 SV=1;tr|X5J4Z6|X5J4Z6_MOUSE IgM heavy chain VDJ region (Fragment)			16568000	11867000	23631000	31842000		16651000
tr|A0A075B6A3|A0A075B6A3_MOUSE;tr|A0A0A6YXW6|A0A0A6YXW6_MOUSE;tr|Q9DCD9|Q9DCD9_MOUSE;tr|Q91Z07|Q91Z07_MOUSE;tr|Q99KA4|Q99KA4_MOUSE;sp|P01878|IGHA_MOUSE;tr|Q99M22|Q99M22_MOUSE;tr|Q8K0Z4|Q8K0Z4_MOUSE;tr|Q8VCV5|Q8VCV5_MOUSE;tr|Q99LA6|Q99LA6_MOUSE	tr|A0A075B6A3|A0A075B6A3_MOUSE;tr|A0A0A6YXW6|A0A0A6YXW6_MOUSE;tr|Q9DCD9|Q9DCD9_MOUSE;tr|Q91Z07|Q91Z07_MOUSE;tr|Q99KA4|Q99KA4_MOUSE;sp|P01878|IGHA_MOUSE;tr|Q99M22|Q99M22_MOUSE;tr|Q8K0Z4|Q8K0Z4_MOUSE;tr|Q8VCV5|Q8VCV5_MOUSE;tr|Q99LA6|Q99LA6_MOUSE	tr|A0A075B6A3|A0A075B6A3_MOUSE Immunoglobulin heavy constant alpha (Fragment) OS=Mus musculus GN=Igha PE=1 SV=1;tr|A0A0A6YXW6|A0A0A6YXW6_MOUSE Immunoglobulin heavy constant alpha (Fragment) OS=Mus musculus GN=Igha PE=1 SV=1;tr|Q9DCD9|Q9DCD9_MOUSE Uncharact	45140000
tr|A0A077S2U6|A0A077S2U6_MOUSE;sp|P08905|LYZ2_MOUSE;tr|A0A077S9N1|A0A077S9N1_MOUSE;sp|P17897|LYZ1_MOUSE	tr|A0A077S2U6|A0A077S2U6_MOUSE;sp|P08905|LYZ2_MOUSE	tr|A0A077S2U6|A0A077S2U6_MOUSE Lysozyme OS=Mus musculus GN=Lyz2 PE=1 SV=1;sp|P08905|LYZ2_MOUSE Lysozyme C-2 OS=Mus musculus GN=Lyz2 PE=1 SV=2	351045000	671310000	803750000	771210000	312200000	474860000	307590000	351160000	1082700000	552850000	517540000	637240000
tr|A0A087WNW2|A0A087WNW2_MOUSE;tr|E9Q171|E9Q171_MOUSE;tr|A0A087WR56|A0A087WR56_MOUSE;tr|E9PW06|E9PW06_MOUSE;sp|Q810U3|NFASC_MOUSE;tr|Q6ZQ54|Q6ZQ54_MOUSE;tr|A0A087WPX3|A0A087WPX3_MOUSE	tr|A0A087WNW2|A0A087WNW2_MOUSE;tr|E9Q171|E9Q171_MOUSE;tr|A0A087WR56|A0A087WR56_MOUSE;tr|E9PW06|E9PW06_MOUSE;sp|Q810U3|NFASC_MOUSE;tr|Q6ZQ54|Q6ZQ54_MOUSE;tr|A0A087WPX3|A0A087WPX3_MOUSE	tr|A0A087WNW2|A0A087WNW2_MOUSE Neurofascin OS=Mus musculus GN=Nfasc PE=1 SV=1;tr|E9Q171|E9Q171_MOUSE Neurofascin OS=Mus musculus GN=Nfasc PE=1 SV=1;tr|A0A087WR56|A0A087WR56_MOUSE Neurofascin (Fragment) OS=Mus musculus GN=Nfasc PE=1 SV=1;tr|E9PW06|E9PW06_MO				5716000
tr|A0A087WQL2|A0A087WQL2_MOUSE;sp|Q9JME9|VTM2B_MOUSE;tr|A0A0U1RNU3|A0A0U1RNU3_MOUSE	tr|A0A087WQL2|A0A087WQL2_MOUSE;sp|Q9JME9|VTM2B_MOUSE;tr|A0A0U1RNU3|A0A0U1RNU3_MOUSE	tr|A0A087WQL2|A0A087WQL2_MOUSE V-set and transmembrane domain-containing protein 2B (Fragment) OS=Mus musculus GN=Vstm2b PE=1 SV=1;sp|Q9JME9|VTM2B_MOUSE V-set and transmembrane domain-containing protein 2B OS=Mus musculus GN=Vstm2b PE=2 SV=1;tr|A0A0U1RNU3|	24915500	52660000		46932000				28688000	36554000		21228000
tr|A0A087WR20|A0A087WR20_MOUSE;tr|Q922Q7|Q922Q7_MOUSE;sp|P49935|CATH_MOUSE	tr|A0A087WR20|A0A087WR20_MOUSE;tr|Q922Q7|Q922Q7_MOUSE;sp|P49935|CATH_MOUSE	tr|A0A087WR20|A0A087WR20_MOUSE Pro-cathepsin H (Fragment) OS=Mus musculus GN=Ctsh PE=1 SV=6;tr|Q922Q7|Q922Q7_MOUSE Cathepsin H OS=Mus musculus GN=Ctsh PE=2 SV=1;sp|P49935|CATH_MOUSE Pro-cathepsin H OS=Mus musculus GN=Ctsh PE=1 SV=2					32080000	32227000
tr|A0A087WSN6|A0A087WSN6_MOUSE;tr|B9EHT6|B9EHT6_MOUSE;tr|Q3UGY5|Q3UGY5_MOUSE;tr|A0A087WR50|A0A087WR50_MOUSE;sp|P11276|FINC_MOUSE;tr|Q3TCF1|Q3TCF1_MOUSE;tr|Q3UHL6|Q3UHL6_MOUSE;tr|B7ZNJ1|B7ZNJ1_MOUSE;tr|A0A087WS56|A0A087WS56_MOUSE;tr|Q3UH17|Q3UH17_MOUSE;tr|Q3TBB4|Q3TBB4_MOUSE;tr|Q3UHR1|Q3UHR1_MOUSE;tr|Q3TCL7|Q3TCL7_MOUSE;tr|Q3UZF9|Q3UZF9_MOUSE;tr|Q8R3F3|Q8R3F3_MOUSE;tr|Q4KL80|Q4KL80_MOUSE;tr|A0A087…	tr|A0A087WSN6|A0A087WSN6_MOUSE;tr|B9EHT6|B9EHT6_MOUSE;tr|Q3UGY5|Q3UGY5_MOUSE;tr|A0A087WR50|A0A087WR50_MOUSE;sp|P11276|FINC_MOUSE;tr|Q3TCF1|Q3TCF1_MOUSE;tr|Q3UHL6|Q3UHL6_MOUSE;tr|B7ZNJ1|B7ZNJ1_MOUSE;tr|A0A087WS56|A0A087WS56_MOUSE;tr|Q3UH17|Q3UH17_MOUSE;tr|Q3TBB4|Q3TBB4_MOUSE;tr|Q3UHR1|Q3UHR1_MOUSE;tr|Q3TCL7|Q3TCL7_MOUSE	tr|A0A087WSN6|A0A087WSN6_MOUSE Fibronectin OS=Mus musculus GN=Fn1 PE=1 SV=1;tr|B9EHT6|B9EHT6_MOUSE Fibronectin OS=Mus musculus GN=Fn1 PE=1 SV=1;tr|Q3UGY5|Q3UGY5_MOUSE Uncharacterized protein OS=Mus musculus GN=Fn1 PE=2 SV=1;tr|A0A087WR50|A0A087WR50_MOUSE F	1350850000	1903400000	2403600000	2797000000	824630000	1523600000	1401200000	1253300000	1647200000	1263800000	703750000	821180000
tr|A0A0A1HAM8|A0A0A1HAM8_MOUSE;sp|P26645|MARCS_MOUSE;tr|Q05BL6|Q05BL6_MOUSE	tr|A0A0A1HAM8|A0A0A1HAM8_MOUSE;sp|P26645|MARCS_MOUSE;tr|Q05BL6|Q05BL6_MOUSE	tr|A0A0A1HAM8|A0A0A1HAM8_MOUSE 80K protein OS=Mus musculus GN=Marcks PE=2 SV=1;sp|P26645|MARCS_MOUSE Myristoylated alanine-rich C-kinase substrate OS=Mus musculus GN=Marcks PE=1 SV=2;tr|Q05BL6|Q05BL6_MOUSE Marcks protein (Fragment) OS=Mus musculus GN=Marck
tr|A0A0A6YWI9|A0A0A6YWI9_MOUSE	tr|A0A0A6YWI9|A0A0A6YWI9_MOUSE	tr|A0A0A6YWI9|A0A0A6YWI9_MOUSE Immunoglobulin heavy variable V1-11 (Fragment) OS=Mus musculus GN=Ighv1-11 PE=4 SV=1											355910000
tr|A0A0A6YXD7|A0A0A6YXD7_MOUSE;sp|P01881|IGHD_MOUSE;tr|A0A0A6YW14|A0A0A6YW14_MOUSE;sp|P01882|IGHDM_MOUSE	tr|A0A0A6YXD7|A0A0A6YXD7_MOUSE;sp|P01881|IGHD_MOUSE;tr|A0A0A6YW14|A0A0A6YW14_MOUSE;sp|P01882|IGHDM_MOUSE	tr|A0A0A6YXD7|A0A0A6YXD7_MOUSE Immunoglobulin heavy constant delta (Fragment) OS=Mus musculus GN=Ighd PE=4 SV=1;sp|P01881|IGHD_MOUSE Ig delta chain C region secreted form OS=Mus musculus PE=1 SV=2;tr|A0A0A6YW14|A0A0A6YW14_MOUSE Immunoglobulin heavy constan				74056000
tr|A0A0A6YXN4|A0A0A6YXN4_MOUSE;tr|A0A075B5U4|A0A075B5U4_MOUSE	tr|A0A0A6YXN4|A0A0A6YXN4_MOUSE;tr|A0A075B5U4|A0A075B5U4_MOUSE	tr|A0A0A6YXN4|A0A0A6YXN4_MOUSE Immunoglobulin heavy variable V1-18 (Fragment) OS=Mus musculus GN=Ighv1-18 PE=1 SV=1;tr|A0A075B5U4|A0A075B5U4_MOUSE Immunoglobulin heavy variable V1-18 OS=Mus musculus GN=Ighv1-18 PE=1 SV=1						50079000
tr|A0A0A6YXQ0|A0A0A6YXQ0_MOUSE	tr|A0A0A6YXQ0|A0A0A6YXQ0_MOUSE	tr|A0A0A6YXQ0|A0A0A6YXQ0_MOUSE Immunoglobulin heavy variable 8-8 (Fragment) OS=Mus musculus GN=Ighv8-8 PE=4 SV=1												30073000
tr|A0A0A6YY91|A0A0A6YY91_MOUSE	tr|A0A0A6YY91|A0A0A6YY91_MOUSE	tr|A0A0A6YY91|A0A0A6YY91_MOUSE Neural cell adhesion molecule 1 (Fragment) OS=Mus musculus GN=Ncam1 PE=1 SV=1	455010000	886430000	786950000	1198900000	437570000	688980000	541370000	574940000	720890000	481930000	408600000	445710000
tr|A0A0B4J1H6|A0A0B4J1H6_MOUSE;sp|P01630|KV2A6_MOUSE	tr|A0A0B4J1H6|A0A0B4J1H6_MOUSE;sp|P01630|KV2A6_MOUSE	tr|A0A0B4J1H6|A0A0B4J1H6_MOUSE Immunoglobulin kappa chain variable 2-137 (Fragment) OS=Mus musculus GN=Igkv2-137 PE=4 SV=1;sp|P01630|KV2A6_MOUSE Ig kappa chain V-II region 7S34.1 OS=Mus musculus PE=1 SV=1	536180000				207320000		58038000
tr|A0A0B4J1I5|A0A0B4J1I5_MOUSE;tr|Q8VDD0|Q8VDD0_MOUSE;sp|P04944|KV6AA_MOUSE;sp|P04943|KV6A9_MOUSE;sp|P04942|KV6A8_MOUSE;sp|P04941|KV6A7_MOUSE;sp|P04940|KV6A6_MOUSE;tr|A0A0B4J1I8|A0A0B4J1I8_MOUSE;tr|A0N275|A0N275_MOUSE	tr|A0A0B4J1I5|A0A0B4J1I5_MOUSE;tr|Q8VDD0|Q8VDD0_MOUSE;sp|P04944|KV6AA_MOUSE;sp|P04943|KV6A9_MOUSE;sp|P04942|KV6A8_MOUSE;sp|P04941|KV6A7_MOUSE;sp|P04940|KV6A6_MOUSE;tr|A0A0B4J1I8|A0A0B4J1I8_MOUSE;tr|A0N275|A0N275_MOUSE	tr|A0A0B4J1I5|A0A0B4J1I5_MOUSE Immunoglobulin kappa chain variable 4-70 (Fragment) OS=Mus musculus GN=Igkv4-70 PE=4 SV=1;tr|Q8VDD0|Q8VDD0_MOUSE Anti-MOG Z12 variable light chain (Fragment) OS=Mus musculus GN=Igkv4-70 PE=2 SV=1;sp|P04944|KV6AA_MOUSE Ig kapp					41399000	37957000
tr|A0A0B4J1J2|A0A0B4J1J2_MOUSE	tr|A0A0B4J1J2|A0A0B4J1J2_MOUSE	tr|A0A0B4J1J2|A0A0B4J1J2_MOUSE Immunoglobulin kappa chain variable 5-43 (Fragment) OS=Mus musculus GN=Igkv5-43 PE=1 SV=1						26389000
tr|A0A0B4J1N0|A0A0B4J1N0_MOUSE;tr|A0A0G2JFE9|A0A0G2JFE9_MOUSE;tr|X5J5L2|X5J5L2_MOUSE;tr|K7U5Q2|K7U5Q2_MOUSE;tr|X5J5F8|X5J5F8_MOUSE;tr|A0A075B5Y5|A0A075B5Y5_MOUSE	tr|A0A0B4J1N0|A0A0B4J1N0_MOUSE;tr|A0A0G2JFE9|A0A0G2JFE9_MOUSE;tr|X5J5L2|X5J5L2_MOUSE	tr|A0A0B4J1N0|A0A0B4J1N0_MOUSE Immunoglobulin heavy variable 1-76 OS=Mus musculus GN=Ighv1-76 PE=1 SV=1;tr|A0A0G2JFE9|A0A0G2JFE9_MOUSE Immunoglobulin heavy variable 1-76 (Fragment) OS=Mus musculus GN=Ighv1-76 PE=1 SV=1;tr|X5J5L2|X5J5L2_MOUSE IgM heavy chai								21022000
tr|A0A0B6VMB2|A0A0B6VMB2_MOUSE;tr|X5J5S9|X5J5S9_MOUSE;tr|X5J4Q6|X5J4Q6_MOUSE;tr|A0A075B5Y4|A0A075B5Y4_MOUSE;tr|U5JE79|U5JE79_MOUSE;sp|P01747|HVM03_MOUSE;sp|P01746|HVM02_MOUSE	tr|A0A0B6VMB2|A0A0B6VMB2_MOUSE	tr|A0A0B6VMB2|A0A0B6VMB2_MOUSE MAb 31C6 heavy chain OS=Mus musculus GN=HC PE=4 SV=1	51800000				38041000	85753000						73537000
tr|A0A0B7FT89|A0A0B7FT89_THACB	tr|A0A0B7FT89|A0A0B7FT89_THACB	tr|A0A0B7FT89|A0A0B7FT89_THACB Ribonuclease H1 OS=Mus musculus GN=Rnaseh1 PE=2 SV=1 OS=Thanatephorus cucumeris (strain AG1-IB / isolate 7/3/14) GN=RSOLAG1IB_03350 PE=4 SV=1											393400000
tr|A0A0C6EL31|A0A0C6EL31_MOUSE;tr|I6L991|I6L991_MOUSE;tr|A0A125T904|A0A125T904_MOUSE;tr|A0A0M4KEQ7|A0A0M4KEQ7_MOUSE;tr|A0A0B6VQ20|A0A0B6VQ20_MOUSE;tr|I6L9E2|I6L9E2_MOUSE;tr|Q52L95|Q52L95_MOUSE;tr|I6L9E1|I6L9E1_MOUSE;tr|A0A5E3|A0A5E3_MOUSE;tr|A0A0E4B213|A0A0E4B213_MOUSE;tr|A0A0F7R5U8|A0A0F7R5U8_MOUSE;sp|P01837|IGKC_MOUSE;tr|A0A075B5P2|A0A075B5P2_MOUSE	tr|A0A0C6EL31|A0A0C6EL31_MOUSE;tr|I6L991|I6L991_MOUSE;tr|A0A125T904|A0A125T904_MOUSE;tr|A0A0M4KEQ7|A0A0M4KEQ7_MOUSE;tr|A0A0B6VQ20|A0A0B6VQ20_MOUSE;tr|I6L9E2|I6L9E2_MOUSE;tr|Q52L95|Q52L95_MOUSE;tr|I6L9E1|I6L9E1_MOUSE;tr|A0A5E3|A0A5E3_MOUSE;tr|A0A0E4B213|A0A0E4B213_MOUSE;tr|A0A0F7R5U8|A0A0F7R5U8_MOUSE;sp|P01837|IGKC_MOUSE;tr|A0A075B5P2|A0A075B5P2_MOUSE	tr|A0A0C6EL31|A0A0C6EL31_MOUSE LC protein OS=Mus musculus GN=LC PE=2 SV=1;tr|I6L991|I6L991_MOUSE Uncharacterized protein OS=Mus musculus PE=1 SV=1;tr|A0A125T904|A0A125T904_MOUSE Light chain kappa OS=Mus musculus GN=Igk PE=2 SV=1;tr|A0A0M4KEQ7|A0A0M4KEQ7_MO	21503000
tr|A0A0D3M042|A0A0D3M042_MOUSE;sp|Q9D3H2|OBP1A_MOUSE;tr|A0A0D3M043|A0A0D3M043_MOUSE;tr|A2AEN9|A2AEN9_MOUSE;tr|A0A0D3M047|A0A0D3M047_MOUSE;tr|A0A0D3M046|A0A0D3M046_MOUSE	tr|A0A0D3M042|A0A0D3M042_MOUSE;sp|Q9D3H2|OBP1A_MOUSE;tr|A0A0D3M043|A0A0D3M043_MOUSE	tr|A0A0D3M042|A0A0D3M042_MOUSE Odorant binding protein 5 OS=Mus musculus domesticus GN=Obp1a PE=2 SV=1;sp|Q9D3H2|OBP1A_MOUSE Odorant-binding protein 1a OS=Mus musculus GN=Obp1a PE=1 SV=2;tr|A0A0D3M043|A0A0D3M043_MOUSE Odorant binding protein 5 OS=Mus muscu							82329000
tr|A0A0D5ZY64|A0A0D5ZY64_MOUSE;tr|A0A125T908|A0A125T908_MOUSE;tr|A0A0F7R1B7|A0A0F7R1B7_MOUSE;tr|Q65ZC0|Q65ZC0_MOUSE;tr|A2P1G9|A2P1G9_MOUSE;tr|A0A125T906|A0A125T906_MOUSE;tr|A0A140T8M0|A0A140T8M0_MOUSE;tr|A2NVX3|A2NVX3_MOUSE;tr|A2NVX2|A2NVX2_MOUSE;tr|A2NVX0|A2NVX0_MOUSE;tr|Q53VP8|Q53VP8_MOUSE;tr|B5DC72|B5DC72_MOUSE;tr|A0A140T8M9|A0A140T8M9_MOUSE;tr|A0A0B4J1I0|A0A0B4J1I0_MOUSE;tr|A0A075B5N0|A0A075B…	tr|A0A0D5ZY64|A0A0D5ZY64_MOUSE;tr|A0A125T908|A0A125T908_MOUSE;tr|A0A0F7R1B7|A0A0F7R1B7_MOUSE;tr|Q65ZC0|Q65ZC0_MOUSE;tr|A2P1G9|A2P1G9_MOUSE;tr|A0A125T906|A0A125T906_MOUSE	tr|A0A0D5ZY64|A0A0D5ZY64_MOUSE IgE L chain kappa OS=Mus musculus PE=2 SV=1;tr|A0A125T908|A0A125T908_MOUSE Light chain kappa OS=Mus musculus GN=Igk PE=2 SV=1;tr|A0A0F7R1B7|A0A0F7R1B7_MOUSE MAb 106 light chain OS=Mus musculus GN=LC PE=2 SV=1;tr|Q65ZC0|Q65ZC0							16475000
tr|A0A0E4B366|A0A0E4B366_MOUSE;tr|A0A0A6YY53|A0A0A6YY53_MOUSE;tr|F6TQW2|F6TQW2_MOUSE;sp|P01864|GCAB_MOUSE;tr|A0A075B5Q6|A0A075B5Q6_MOUSE;tr|A0A0A6YVS4|A0A0A6YVS4_MOUSE;tr|K7U6I0|K7U6I0_MOUSE;tr|K7T918|K7T918_MOUSE;tr|B5UB70|B5UB70_MOUSE;tr|X5J564|X5J564_MOUSE;tr|X5J5S4|X5J5S4_MOUSE;tr|K7TDT0|K7TDT0_MOUSE;tr|K7THE9|K7THE9_MOUSE;tr|K7TRT7|K7TRT7_MOUSE;tr|K7THF4|K7THF4_MOUSE;tr|K7T9D0|K7T9D0_MOUSE;t…	tr|A0A0E4B366|A0A0E4B366_MOUSE;tr|A0A0A6YY53|A0A0A6YY53_MOUSE;tr|F6TQW2|F6TQW2_MOUSE	tr|A0A0E4B366|A0A0E4B366_MOUSE MAb 44B1 heavy chain OS=Mus musculus GN=HC PE=2 SV=1;tr|A0A0A6YY53|A0A0A6YY53_MOUSE Immunoglobulin heavy constant gamma 2C (Fragment) OS=Mus musculus GN=Ighg2c PE=1 SV=1;tr|F6TQW2|F6TQW2_MOUSE Immunoglobulin heavy constant ga											28786000
tr|A0A0G2JDI4|A0A0G2JDI4_MOUSE;tr|Q4FJZ6|Q4FJZ6_MOUSE;tr|Q3T9P2|Q3T9P2_MOUSE;sp|O09172|GSH0_MOUSE;tr|H3BJA3|H3BJA3_MOUSE	tr|A0A0G2JDI4|A0A0G2JDI4_MOUSE;tr|Q4FJZ6|Q4FJZ6_MOUSE;tr|Q3T9P2|Q3T9P2_MOUSE;sp|O09172|GSH0_MOUSE;tr|H3BJA3|H3BJA3_MOUSE	tr|A0A0G2JDI4|A0A0G2JDI4_MOUSE Glutamate--cysteine ligase regulatory subunit (Fragment) OS=Mus musculus GN=Gclm PE=1 SV=1;tr|Q4FJZ6|Q4FJZ6_MOUSE Gclm protein OS=Mus musculus GN=Gclm PE=1 SV=1;tr|Q3T9P2|Q3T9P2_MOUSE Uncharacterized protein OS=Mus musculus G	24501000				19591000					33008000		17741000
tr|A0A0G2JDM6|A0A0G2JDM6_MOUSE;tr|Q543Z1|Q543Z1_MOUSE;tr|B9UIT4|B9UIT4_MOUSE;sp|P21836|ACES_MOUSE;tr|Q78ED5|Q78ED5_MOUSE	tr|A0A0G2JDM6|A0A0G2JDM6_MOUSE;tr|Q543Z1|Q543Z1_MOUSE;tr|B9UIT4|B9UIT4_MOUSE;sp|P21836|ACES_MOUSE;tr|Q78ED5|Q78ED5_MOUSE	tr|A0A0G2JDM6|A0A0G2JDM6_MOUSE Carboxylic ester hydrolase OS=Mus musculus GN=Ache PE=1 SV=1;tr|Q543Z1|Q543Z1_MOUSE Carboxylic ester hydrolase OS=Mus musculus GN=Ache PE=2 SV=1;tr|B9UIT4|B9UIT4_MOUSE Carboxylic ester hydrolase OS=Mus musculus GN=Ache PE=2 S			18980000
tr|A0A0G2JEU1|A0A0G2JEU1_MOUSE;tr|Q544B1|Q544B1_MOUSE;tr|Q3UJW1|Q3UJW1_MOUSE;tr|Q3U9J7|Q3U9J7_MOUSE;tr|Q3U6I3|Q3U6I3_MOUSE;tr|Q3TVM2|Q3TVM2_MOUSE;sp|P47738|ALDH2_MOUSE;tr|A0A0G2JF60|A0A0G2JF60_MOUSE;tr|A0A0G2JFQ0|A0A0G2JFQ0_MOUSE;tr|D3YYF3|D3YYF3_MOUSE	tr|A0A0G2JEU1|A0A0G2JEU1_MOUSE;tr|Q544B1|Q544B1_MOUSE;tr|Q3UJW1|Q3UJW1_MOUSE;tr|Q3U9J7|Q3U9J7_MOUSE;tr|Q3U6I3|Q3U6I3_MOUSE;tr|Q3TVM2|Q3TVM2_MOUSE;sp|P47738|ALDH2_MOUSE	tr|A0A0G2JEU1|A0A0G2JEU1_MOUSE Aldehyde dehydrogenase, mitochondrial OS=Mus musculus GN=Aldh2 PE=1 SV=1;tr|Q544B1|Q544B1_MOUSE Aldehyde dehydrogenase 2, mitochondrial, isoform CRA_b OS=Mus musculus GN=Aldh2 PE=1 SV=1;tr|Q3UJW1|Q3UJW1_MOUSE Uncharacterized					135860000	188440000	138550000	108970000	95659000		124260000
tr|A0A0J9YKD4|A0A0J9YKD4_MOUSE	tr|A0A0J9YKD4|A0A0J9YKD4_MOUSE	tr|A0A0J9YKD4|A0A0J9YKD4_MOUSE Creatine kinase M-type OS=Mus musculus GN=Ckm PE=1 SV=1		109310000
tr|A0A0J9YTY0|A0A0J9YTY0_MOUSE;sp|Q8C1B7|SEP11_MOUSE;tr|A0A0J9YUL3|A0A0J9YUL3_MOUSE;tr|A0A0J9YUV6|A0A0J9YUV6_MOUSE;tr|A0A0J9YVA6|A0A0J9YVA6_MOUSE	tr|A0A0J9YTY0|A0A0J9YTY0_MOUSE;sp|Q8C1B7|SEP11_MOUSE;tr|A0A0J9YUL3|A0A0J9YUL3_MOUSE;tr|A0A0J9YUV6|A0A0J9YUV6_MOUSE;tr|A0A0J9YVA6|A0A0J9YVA6_MOUSE	tr|A0A0J9YTY0|A0A0J9YTY0_MOUSE Septin-11 OS=Mus musculus GN=Sept11 PE=1 SV=1;sp|Q8C1B7|SEP11_MOUSE Septin-11 OS=Mus musculus GN=Sept11 PE=1 SV=4;tr|A0A0J9YUL3|A0A0J9YUL3_MOUSE Septin 11, isoform CRA_b OS=Mus musculus GN=Sept11 PE=1 SV=1;tr|A0A0J9YUV6|A0A0J					4769300
tr|A0A0J9YUD8|A0A0J9YUD8_MOUSE;tr|Q8C7C4|Q8C7C4_MOUSE;tr|Q8BNM0|Q8BNM0_MOUSE;tr|A0A0J9YUZ4|A0A0J9YUZ4_MOUSE;tr|Q58EV5|Q58EV5_MOUSE;tr|Q497Z6|Q497Z6_MOUSE;tr|Q3UBK2|Q3UBK2_MOUSE;sp|P63158|HMGB1_MOUSE;tr|Q8BQ02|Q8BQ02_MOUSE;tr|Q6P202|Q6P202_MOUSE;tr|Q3UJK0|Q3UJK0_MOUSE;tr|D3YZ18|D3YZ18_MOUSE	tr|A0A0J9YUD8|A0A0J9YUD8_MOUSE;tr|Q8C7C4|Q8C7C4_MOUSE;tr|Q8BNM0|Q8BNM0_MOUSE;tr|A0A0J9YUZ4|A0A0J9YUZ4_MOUSE;tr|Q58EV5|Q58EV5_MOUSE;tr|Q497Z6|Q497Z6_MOUSE;tr|Q3UBK2|Q3UBK2_MOUSE;sp|P63158|HMGB1_MOUSE;tr|Q8BQ02|Q8BQ02_MOUSE;tr|Q6P202|Q6P202_MOUSE;tr|Q3UJK0|Q3UJK0_MOUSE	tr|A0A0J9YUD8|A0A0J9YUD8_MOUSE High mobility group protein B1 OS=Mus musculus GN=Hmgb1 PE=1 SV=1;tr|Q8C7C4|Q8C7C4_MOUSE Uncharacterized protein (Fragment) OS=Mus musculus PE=2 SV=1;tr|Q8BNM0|Q8BNM0_MOUSE Uncharacterized protein (Fragment) OS=Mus musculus P									14890000
tr|A0A0N4SUM4|A0A0N4SUM4_MOUSE	tr|A0A0N4SUM4|A0A0N4SUM4_MOUSE	tr|A0A0N4SUM4|A0A0N4SUM4_MOUSE Neural cell adhesion molecule L1-like protein OS=Mus musculus GN=Chl1 PE=1 SV=1				8944700
tr|A0A0N4SV66|A0A0N4SV66_MOUSE;tr|A0AUV1|A0AUV1_MOUSE;tr|A3KPD0|A3KPD0_MOUSE;sp|Q8CGP6|H2A1H_MOUSE;tr|Q8CGP4|Q8CGP4_MOUSE;tr|Q149V4|Q149V4_MOUSE;sp|Q8R1M2|H2AJ_MOUSE;sp|Q64523|H2A2C_MOUSE;tr|B2RWH3|B2RWH3_MOUSE;tr|B2RVF0|B2RVF0_MOUSE;tr|A2AB79|A2AB79_MOUSE;sp|Q8CGP7|H2A1K_MOUSE;sp|Q8CGP5|H2A1F_MOUSE;sp|Q8BFU2|H2A3_MOUSE;sp|Q6GSS7|H2A2A_MOUSE;sp|C0HKE9|H2A1P_MOUSE;sp|C0HKE8|H2A1O_MOUSE;sp|C0HKE7|H…	tr|A0A0N4SV66|A0A0N4SV66_MOUSE;tr|A0AUV1|A0AUV1_MOUSE;tr|A3KPD0|A3KPD0_MOUSE;sp|Q8CGP6|H2A1H_MOUSE;tr|Q8CGP4|Q8CGP4_MOUSE;tr|Q149V4|Q149V4_MOUSE;sp|Q8R1M2|H2AJ_MOUSE;sp|Q64523|H2A2C_MOUSE;tr|B2RWH3|B2RWH3_MOUSE;tr|B2RVF0|B2RVF0_MOUSE;tr|A2AB79|A2AB79_MOUSE;sp|Q8CGP7|H2A1K_MOUSE;sp|Q8CGP5|H2A1F_MOUSE;sp|Q8BFU2|H2A3_MOUSE;sp|Q6GSS7|H2A2A_MOUSE;sp|C0HKE9|H2A1P_MOUSE;sp|C0HKE8|H2A1O_MOUSE;sp|C0HKE7|H…	tr|A0A0N4SV66|A0A0N4SV66_MOUSE Histone H2A OS=Mus musculus GN=H2afj PE=1 SV=1;tr|A0AUV1|A0AUV1_MOUSE Histone H2A (Fragment) OS=Mus musculus GN=Hist1h2ah PE=2 SV=1;tr|A3KPD0|A3KPD0_MOUSE Histone H2A OS=Mus musculus GN=Hist1h2ah PE=2 SV=1;sp|Q8CGP6|H2A1H_MOU		46666000			84017000	116390000	90250000	63078000	61178000		63019000
tr|A0A0N4SVQ1|A0A0N4SVQ1_MOUSE;sp|Q62425|NDUA4_MOUSE	tr|A0A0N4SVQ1|A0A0N4SVQ1_MOUSE;sp|Q62425|NDUA4_MOUSE	tr|A0A0N4SVQ1|A0A0N4SVQ1_MOUSE Cytochrome c oxidase subunit NDUFA4 OS=Mus musculus GN=Ndufa4 PE=1 SV=1;sp|Q62425|NDUA4_MOUSE Cytochrome c oxidase subunit NDUFA4 OS=Mus musculus GN=Ndufa4 PE=1 SV=2						82438000
tr|A0A0N4SVV4|A0A0N4SVV4_MOUSE	tr|A0A0N4SVV4|A0A0N4SVV4_MOUSE	tr|A0A0N4SVV4|A0A0N4SVV4_MOUSE Retinoic acid receptor responder protein 2 OS=Mus musculus GN=Rarres2 PE=1 SV=1
tr|A0A0R4IZW8|A0A0R4IZW8_MOUSE;sp|O88456|CPNS1_MOUSE;tr|A0A0R4J1C2|A0A0R4J1C2_MOUSE	tr|A0A0R4IZW8|A0A0R4IZW8_MOUSE;sp|O88456|CPNS1_MOUSE;tr|A0A0R4J1C2|A0A0R4J1C2_MOUSE	tr|A0A0R4IZW8|A0A0R4IZW8_MOUSE Calpain small subunit 1 OS=Mus musculus GN=Capns1 PE=1 SV=1;sp|O88456|CPNS1_MOUSE Calpain small subunit 1 OS=Mus musculus GN=Capns1 PE=1 SV=1;tr|A0A0R4J1C2|A0A0R4J1C2_MOUSE Calpain small subunit 1 OS=Mus musculus GN=Capns1 PE							5132500
tr|A0A0R4IZX5|A0A0R4IZX5_MOUSE;sp|P55066|NCAN_MOUSE	tr|A0A0R4IZX5|A0A0R4IZX5_MOUSE;sp|P55066|NCAN_MOUSE	tr|A0A0R4IZX5|A0A0R4IZX5_MOUSE Neurocan core protein OS=Mus musculus GN=Ncan PE=1 SV=1;sp|P55066|NCAN_MOUSE Neurocan core protein OS=Mus musculus GN=Ncan PE=1 SV=1				18427000
tr|A0A0R4J036|A0A0R4J036_MOUSE;sp|P08553|NFM_MOUSE;tr|Q3UMG4|Q3UMG4_MOUSE;tr|D3YZ35|D3YZ35_MOUSE;sp|P46660|AINX_MOUSE	tr|A0A0R4J036|A0A0R4J036_MOUSE;sp|P08553|NFM_MOUSE	tr|A0A0R4J036|A0A0R4J036_MOUSE Neurofilament 3, medium OS=Mus musculus GN=Nefm PE=1 SV=1;sp|P08553|NFM_MOUSE Neurofilament medium polypeptide OS=Mus musculus GN=Nefm PE=1 SV=4	244285000				62136000						45336000
tr|A0A0R4J038|A0A0R4J038_MOUSE;sp|O08677|KNG1_MOUSE;tr|D3YTY9|D3YTY9_MOUSE;tr|D3Z2B2|D3Z2B2_MOUSE	tr|A0A0R4J038|A0A0R4J038_MOUSE;sp|O08677|KNG1_MOUSE;tr|D3YTY9|D3YTY9_MOUSE	tr|A0A0R4J038|A0A0R4J038_MOUSE Kininogen-1 OS=Mus musculus GN=Kng1 PE=1 SV=1;sp|O08677|KNG1_MOUSE Kininogen-1 OS=Mus musculus GN=Kng1 PE=1 SV=1;tr|D3YTY9|D3YTY9_MOUSE Kininogen-1 OS=Mus musculus GN=Kng1 PE=1 SV=1	3659550000	5415300000	4363200000	5420200000	4779500000	4326100000	5691500000	6737600000	5522800000	4332900000	4693500000	4624000000
tr|A0A0R4J052|A0A0R4J052_MOUSE;tr|G5E8T9|G5E8T9_MOUSE;sp|Q99KB8|GLO2_MOUSE;tr|E9PYA3|E9PYA3_MOUSE;tr|E9Q2H8|E9Q2H8_MOUSE;tr|D3YWI0|D3YWI0_MOUSE;tr|D3YUX8|D3YUX8_MOUSE	tr|A0A0R4J052|A0A0R4J052_MOUSE;tr|G5E8T9|G5E8T9_MOUSE;sp|Q99KB8|GLO2_MOUSE;tr|E9PYA3|E9PYA3_MOUSE;tr|E9Q2H8|E9Q2H8_MOUSE;tr|D3YWI0|D3YWI0_MOUSE	tr|A0A0R4J052|A0A0R4J052_MOUSE Hydroxyacylglutathione hydrolase, mitochondrial OS=Mus musculus GN=Hagh PE=1 SV=1;tr|G5E8T9|G5E8T9_MOUSE Hydroxyacyl glutathione hydrolase OS=Mus musculus GN=Hagh PE=1 SV=1;sp|Q99KB8|GLO2_MOUSE Hydroxyacylglutathione hydrolas	201880000		49452000		85479000		59310000	74915000	58516000	84337000	81477000	124210000
tr|A0A0R4J083|A0A0R4J083_MOUSE;sp|P51174|ACADL_MOUSE	tr|A0A0R4J083|A0A0R4J083_MOUSE;sp|P51174|ACADL_MOUSE	tr|A0A0R4J083|A0A0R4J083_MOUSE Long-chain-specific acyl-CoA dehydrogenase, mitochondrial OS=Mus musculus GN=Acadl PE=1 SV=1;sp|P51174|ACADL_MOUSE Long-chain specific acyl-CoA dehydrogenase, mitochondrial OS=Mus musculus GN=Acadl PE=1 SV=2	138140000	96203000	69332000		216500000	230480000	190980000	92898000	88519000		85371000	72153000
tr|A0A0R4J086|A0A0R4J086_MOUSE;sp|Q8BK62|OLFL3_MOUSE	tr|A0A0R4J086|A0A0R4J086_MOUSE;sp|Q8BK62|OLFL3_MOUSE	tr|A0A0R4J086|A0A0R4J086_MOUSE Olfactomedin-like protein 3 OS=Mus musculus GN=Olfml3 PE=1 SV=1;sp|Q8BK62|OLFL3_MOUSE Olfactomedin-like protein 3 OS=Mus musculus GN=Olfml3 PE=2 SV=2									17080000
tr|A0A0R4J0I1|A0A0R4J0I1_MOUSE	tr|A0A0R4J0I1|A0A0R4J0I1_MOUSE	tr|A0A0R4J0I1|A0A0R4J0I1_MOUSE MCG1051009 OS=Mus musculus GN=Serpina3k PE=1 SV=1	10214100000	19900000000	10959000000	19434000000	5041800000	6835500000	15574000000	18817000000	13333000000	31712000000	25518000000	31465000000
tr|A0A0R4J0I9|A0A0R4J0I9_MOUSE;sp|Q91ZX7|LRP1_MOUSE;tr|Q3U454|Q3U454_MOUSE;tr|Q3U5J2|Q3U5J2_MOUSE	tr|A0A0R4J0I9|A0A0R4J0I9_MOUSE;sp|Q91ZX7|LRP1_MOUSE;tr|Q3U454|Q3U454_MOUSE	tr|A0A0R4J0I9|A0A0R4J0I9_MOUSE Low density lipoprotein receptor-related protein 1 OS=Mus musculus GN=Lrp1 PE=1 SV=1;sp|Q91ZX7|LRP1_MOUSE Prolow-density lipoprotein receptor-related protein 1 OS=Mus musculus GN=Lrp1 PE=1 SV=1;tr|Q3U454|Q3U454_MOUSE Uncharac				19611000
tr|A0A0R4J0X5|A0A0R4J0X5_MOUSE	tr|A0A0R4J0X5|A0A0R4J0X5_MOUSE	tr|A0A0R4J0X5|A0A0R4J0X5_MOUSE Alpha-1-antitrypsin 1-3 OS=Mus musculus GN=Serpina1c PE=1 SV=1	6419750000	5373400000	4737700000	5190300000	3536300000	3523400000	6096800000	6901100000	4246900000	10234000000	8710200000	9498900000
tr|A0A0R4J107|A0A0R4J107_MOUSE;sp|Q8R146|APEH_MOUSE;tr|A0A0A6YXV0|A0A0A6YXV0_MOUSE	tr|A0A0R4J107|A0A0R4J107_MOUSE;sp|Q8R146|APEH_MOUSE	tr|A0A0R4J107|A0A0R4J107_MOUSE Acylamino-acid-releasing enzyme (Fragment) OS=Mus musculus GN=Apeh PE=1 SV=1;sp|Q8R146|APEH_MOUSE Acylamino-acid-releasing enzyme OS=Mus musculus GN=Apeh PE=1 SV=3	182470000				36865000	44524000	44908000			107160000	67521000	101260000
tr|A0A0R4J1N3|A0A0R4J1N3_MOUSE;sp|P33622|APOC3_MOUSE;tr|E9QP56|E9QP56_MOUSE	tr|A0A0R4J1N3|A0A0R4J1N3_MOUSE;sp|P33622|APOC3_MOUSE;tr|E9QP56|E9QP56_MOUSE	tr|A0A0R4J1N3|A0A0R4J1N3_MOUSE Apolipoprotein C-III OS=Mus musculus GN=Apoc3 PE=1 SV=1;sp|P33622|APOC3_MOUSE Apolipoprotein C-III OS=Mus musculus GN=Apoc3 PE=1 SV=2;tr|E9QP56|E9QP56_MOUSE Apolipoprotein C-III OS=Mus musculus GN=Apoc3 PE=1 SV=1					26272000			33141000		113990000	63133000	64248000
tr|A0A0R4J2B2|A0A0R4J2B2_MOUSE;sp|Q6WVG3|KCD12_MOUSE;tr|Q8CBQ4|Q8CBQ4_MOUSE;tr|Q69ZA6|Q69ZA6_MOUSE;tr|Q14AX3|Q14AX3_MOUSE	tr|A0A0R4J2B2|A0A0R4J2B2_MOUSE;sp|Q6WVG3|KCD12_MOUSE;tr|Q8CBQ4|Q8CBQ4_MOUSE;tr|Q69ZA6|Q69ZA6_MOUSE	tr|A0A0R4J2B2|A0A0R4J2B2_MOUSE BTB/POZ domain-containing protein KCTD12 OS=Mus musculus GN=Kctd12 PE=1 SV=1;sp|Q6WVG3|KCD12_MOUSE BTB/POZ domain-containing protein KCTD12 OS=Mus musculus GN=Kctd12 PE=1 SV=1;tr|Q8CBQ4|Q8CBQ4_MOUSE Uncharacterized protein OS						12119000
tr|A0A0U1RNJ1|A0A0U1RNJ1_MOUSE;tr|Q3UHT6|Q3UHT6_MOUSE;sp|P19096|FAS_MOUSE;tr|Q3TB22|Q3TB22_MOUSE	tr|A0A0U1RNJ1|A0A0U1RNJ1_MOUSE;tr|Q3UHT6|Q3UHT6_MOUSE;sp|P19096|FAS_MOUSE;tr|Q3TB22|Q3TB22_MOUSE	tr|A0A0U1RNJ1|A0A0U1RNJ1_MOUSE Fatty acid synthase OS=Mus musculus GN=Fasn PE=1 SV=1;tr|Q3UHT6|Q3UHT6_MOUSE Uncharacterized protein OS=Mus musculus GN=Fasn PE=2 SV=1;sp|P19096|FAS_MOUSE Fatty acid synthase OS=Mus musculus GN=Fasn PE=1 SV=2;tr|Q3TB22|Q3TB22	129705000				35654000		15703000
tr|A0A0U1RP93|A0A0U1RP93_MOUSE;tr|Q545G1|Q545G1_MOUSE;sp|P97457|MLRS_MOUSE;tr|A0A0U1RQ36|A0A0U1RQ36_MOUSE;tr|F6ULR7|F6ULR7_MOUSE	tr|A0A0U1RP93|A0A0U1RP93_MOUSE;tr|Q545G1|Q545G1_MOUSE;sp|P97457|MLRS_MOUSE	tr|A0A0U1RP93|A0A0U1RP93_MOUSE Myosin regulatory light chain 2, skeletal muscle isoform OS=Mus musculus GN=Mylpf PE=1 SV=1;tr|Q545G1|Q545G1_MOUSE Uncharacterized protein OS=Mus musculus GN=Mylpf PE=1 SV=1;sp|P97457|MLRS_MOUSE Myosin regulatory light chain	223575000	81241000	55901000		136950000	296600000	216430000	53930000	56178000		92888000	58708000
tr|A0A140LHB6|A0A140LHB6_MOUSE;sp|Q8R0A6|VTM2A_MOUSE;tr|F6Y6A6|F6Y6A6_MOUSE	tr|A0A140LHB6|A0A140LHB6_MOUSE;sp|Q8R0A6|VTM2A_MOUSE;tr|F6Y6A6|F6Y6A6_MOUSE	tr|A0A140LHB6|A0A140LHB6_MOUSE V-set and transmembrane domain-containing protein 2A (Fragment) OS=Mus musculus GN=Vstm2a PE=1 SV=1;sp|Q8R0A6|VTM2A_MOUSE V-set and transmembrane domain-containing protein 2A OS=Mus musculus GN=Vstm2a PE=1 SV=2;tr|F6Y6A6|F6Y6		62824000				52083000	52586000		55121000	51424000	55376000	56809000
tr|A0A140LJL0|A0A140LJL0_MOUSE;tr|Q3UWG5|Q3UWG5_MOUSE;sp|P35762|CD81_MOUSE	tr|A0A140LJL0|A0A140LJL0_MOUSE;tr|Q3UWG5|Q3UWG5_MOUSE;sp|P35762|CD81_MOUSE	tr|A0A140LJL0|A0A140LJL0_MOUSE CD81 antigen (Fragment) OS=Mus musculus GN=Cd81 PE=1 SV=1;tr|Q3UWG5|Q3UWG5_MOUSE Tetraspanin OS=Mus musculus GN=Cd81 PE=2 SV=1;sp|P35762|CD81_MOUSE CD81 antigen OS=Mus musculus GN=Cd81 PE=1 SV=2							17978000
tr|A0A140T8M2|A0A140T8M2_MOUSE;tr|A2NMA3|A2NMA3_MOUSE;sp|P01636|KV5A4_MOUSE	tr|A0A140T8M2|A0A140T8M2_MOUSE;tr|A2NMA3|A2NMA3_MOUSE;sp|P01636|KV5A4_MOUSE	tr|A0A140T8M2|A0A140T8M2_MOUSE Immunoglobulin kappa variable 12-44 (Fragment) OS=Mus musculus GN=Igkv12-44 PE=4 SV=2;tr|A2NMA3|A2NMA3_MOUSE Anti-carcinoma embryonic antigen light chain variable region (Fragment) OS=Mus musculus PE=2 SV=1;sp|P01636|KV5A4_MO	127560000										72584000
tr|A0A140T8M5|A0A140T8M5_MOUSE;tr|Q8VIJ0|Q8VIJ0_MOUSE	tr|A0A140T8M5|A0A140T8M5_MOUSE;tr|Q8VIJ0|Q8VIJ0_MOUSE	tr|A0A140T8M5|A0A140T8M5_MOUSE Immunoglobulin kappa variable 6-15 (Fragment) OS=Mus musculus GN=Igkv6-15 PE=1 SV=2;tr|Q8VIJ0|Q8VIJ0_MOUSE Anti-DNA light chain (Fragment) OS=Mus musculus GN=Igkv6-14 PE=2 SV=1									19410000
tr|A0A140T8N0|A0A140T8N0_MOUSE;sp|P01639|KV5A7_MOUSE;tr|A0A1E1GJG6|A0A1E1GJG6_MOUSE	tr|A0A140T8N0|A0A140T8N0_MOUSE;sp|P01639|KV5A7_MOUSE;tr|A0A1E1GJG6|A0A1E1GJG6_MOUSE	tr|A0A140T8N0|A0A140T8N0_MOUSE Immunoglobulin kappa chain variable 9-120 (Fragment) OS=Mus musculus GN=Igkv9-120 PE=1 SV=2;sp|P01639|KV5A7_MOUSE Ig kappa chain V-V region MOPC 41 OS=Mus musculus GN=Gm5571 PE=1 SV=1;tr|A0A1E1GJG6|A0A1E1GJG6_MOUSE Single-cha										42977000
tr|A0A140T8P2|A0A140T8P2_MOUSE;tr|A0A075B5N2|A0A075B5N2_MOUSE;tr|A0A0G2JEI6|A0A0G2JEI6_MOUSE;sp|P01634|KV5A2_MOUSE;sp|P01632|KV1A1_MOUSE;tr|A0A075B5N1|A0A075B5N1_MOUSE;tr|A0A0G2JDJ8|A0A0G2JDJ8_MOUSE	tr|A0A140T8P2|A0A140T8P2_MOUSE;tr|A0A075B5N2|A0A075B5N2_MOUSE;tr|A0A0G2JEI6|A0A0G2JEI6_MOUSE;sp|P01634|KV5A2_MOUSE	tr|A0A140T8P2|A0A140T8P2_MOUSE Immunoglobulin kappa variable 6-20 (Fragment) OS=Mus musculus GN=Igkv6-20 PE=4 SV=2;tr|A0A075B5N2|A0A075B5N2_MOUSE Immunoglobulin kappa chain variable 6-29 OS=Mus musculus GN=Igkv6-29 PE=4 SV=7;tr|A0A0G2JEI6|A0A0G2JEI6_MOUSE											25046000
tr|A0A140T8P5|A0A140T8P5_MOUSE;tr|A2N1N1|A2N1N1_MOUSE	tr|A0A140T8P5|A0A140T8P5_MOUSE;tr|A2N1N1|A2N1N1_MOUSE	tr|A0A140T8P5|A0A140T8P5_MOUSE Immunoglobulin kappa chain variable 8-24 (Fragment) OS=Mus musculus GN=Igkv8-24 PE=4 SV=2;tr|A2N1N1|A2N1N1_MOUSE B cell antigen receptor OS=Mus musculus PE=4 SV=1											302200000
tr|A0A140T8Q3|A0A140T8Q3_MOUSE;sp|P01633|KV5A1_MOUSE	tr|A0A140T8Q3|A0A140T8Q3_MOUSE;sp|P01633|KV5A1_MOUSE	tr|A0A140T8Q3|A0A140T8Q3_MOUSE Immunoglobulin kappa variable 6-17 (Fragment) OS=Mus musculus GN=Igkv6-17 PE=1 SV=2;sp|P01633|KV5A1_MOUSE Ig kappa chain V19-17 OS=Mus musculus GN=Igk-V19-17 PE=1 SV=1	114230000
tr|A0A140T8S0|A0A140T8S0_MOUSE;sp|Q6DIB5|MEG10_MOUSE	tr|A0A140T8S0|A0A140T8S0_MOUSE;sp|Q6DIB5|MEG10_MOUSE	tr|A0A140T8S0|A0A140T8S0_MOUSE Multiple epidermal growth factor-like domains protein 10 (Fragment) OS=Mus musculus GN=Megf10 PE=1 SV=2;sp|Q6DIB5|MEG10_MOUSE Multiple epidermal growth factor-like domains protein 10 OS=Mus musculus GN=Megf10 PE=1 SV=1		23007000
tr|A0A146E664|A0A146E664_MOUSE;sp|Q6GU68|ISLR_MOUSE;tr|A0A1L1STF4|A0A1L1STF4_MOUSE	tr|A0A146E664|A0A146E664_MOUSE;sp|Q6GU68|ISLR_MOUSE;tr|A0A1L1STF4|A0A1L1STF4_MOUSE	tr|A0A146E664|A0A146E664_MOUSE Immunoglobulin superfamily containing leucine-rich repeat, isoform CRA_c OS=Mus musculus GN=Islr PE=2 SV=1;sp|Q6GU68|ISLR_MOUSE Immunoglobulin superfamily containing leucine-rich repeat protein OS=Mus musculus GN=Islr PE=1 SV		21176000	21210000	27723000	26201000	28432000	21891000		18636000		20720000
tr|A0A1B0GSX6|A0A1B0GSX6_MOUSE;sp|O70209|PDLI3_MOUSE	tr|A0A1B0GSX6|A0A1B0GSX6_MOUSE;sp|O70209|PDLI3_MOUSE	tr|A0A1B0GSX6|A0A1B0GSX6_MOUSE PDZ and LIM domain 3, isoform CRA_a OS=Mus musculus GN=Pdlim3 PE=1 SV=1;sp|O70209|PDLI3_MOUSE PDZ and LIM domain protein 3 OS=Mus musculus GN=Pdlim3 PE=1 SV=1											2160500
tr|A0A1B0GX27|A0A1B0GX27_MOUSE;tr|O88374|O88374_MOUSE;tr|Q3ULU3|Q3ULU3_MOUSE;sp|O35855|BCAT2_MOUSE	tr|A0A1B0GX27|A0A1B0GX27_MOUSE;tr|O88374|O88374_MOUSE;tr|Q3ULU3|Q3ULU3_MOUSE;sp|O35855|BCAT2_MOUSE	tr|A0A1B0GX27|A0A1B0GX27_MOUSE Branched-chain-amino-acid aminotransferase OS=Mus musculus GN=Bcat2 PE=1 SV=1;tr|O88374|O88374_MOUSE Branched-chain-amino-acid aminotransferase OS=Mus musculus GN=Bcat2 PE=1 SV=1;tr|Q3ULU3|Q3ULU3_MOUSE Branched-chain-amino-ac			210600000
tr|A0A1C7CYU3|A0A1C7CYU3_MOUSE;sp|Q02819|NUCB1_MOUSE;tr|Q8BRD3|Q8BRD3_MOUSE;tr|Q3TCI1|Q3TCI1_MOUSE;tr|A0A1B0GR41|A0A1B0GR41_MOUSE;tr|A0A1B0GR92|A0A1B0GR92_MOUSE;tr|A0A1B0GS16|A0A1B0GS16_MOUSE;tr|A0A1B0GT83|A0A1B0GT83_MOUSE	tr|A0A1C7CYU3|A0A1C7CYU3_MOUSE;sp|Q02819|NUCB1_MOUSE;tr|Q8BRD3|Q8BRD3_MOUSE;tr|Q3TCI1|Q3TCI1_MOUSE;tr|A0A1B0GR41|A0A1B0GR41_MOUSE	tr|A0A1C7CYU3|A0A1C7CYU3_MOUSE Nucleobindin 1, isoform CRA_b OS=Mus musculus GN=Nucb1 PE=1 SV=1;sp|Q02819|NUCB1_MOUSE Nucleobindin-1 OS=Mus musculus GN=Nucb1 PE=1 SV=2;tr|Q8BRD3|Q8BRD3_MOUSE Uncharacterized protein OS=Mus musculus GN=Nucb1 PE=2 SV=1;tr|Q3T	107081000	140070000	173850000	151230000	211800000	115450000	112160000	252590000	123720000	80132000	75933000	68519000
tr|A0A1C7CYV0|A0A1C7CYV0_MOUSE;tr|Q3UKB1|Q3UKB1_MOUSE;sp|Q99K51|PLST_MOUSE;tr|Q3UJG9|Q3UJG9_MOUSE;tr|B1AX58|B1AX58_MOUSE	tr|A0A1C7CYV0|A0A1C7CYV0_MOUSE;tr|Q3UKB1|Q3UKB1_MOUSE;sp|Q99K51|PLST_MOUSE;tr|Q3UJG9|Q3UJG9_MOUSE;tr|B1AX58|B1AX58_MOUSE	tr|A0A1C7CYV0|A0A1C7CYV0_MOUSE Plastin-3 (Fragment) OS=Mus musculus GN=Pls3 PE=1 SV=1;tr|Q3UKB1|Q3UKB1_MOUSE Uncharacterized protein OS=Mus musculus GN=Pls3 PE=2 SV=1;sp|Q99K51|PLST_MOUSE Plastin-3 OS=Mus musculus GN=Pls3 PE=1 SV=3;tr|Q3UJG9|Q3UJG9_MOUSE U							4402600
tr|A0A1L1SRW0|A0A1L1SRW0_MOUSE;tr|B2CY77|B2CY77_MOUSE;sp|P14206|RSSA_MOUSE	tr|A0A1L1SRW0|A0A1L1SRW0_MOUSE;tr|B2CY77|B2CY77_MOUSE;sp|P14206|RSSA_MOUSE	tr|A0A1L1SRW0|A0A1L1SRW0_MOUSE 40S ribosomal protein SA (Fragment) OS=Mus musculus GN=Rpsa PE=1 SV=1;tr|B2CY77|B2CY77_MOUSE Laminin receptor (Fragment) OS=Mus musculus GN=Rpsa PE=2 SV=1;sp|P14206|RSSA_MOUSE 40S ribosomal protein SA OS=Mus musculus GN=Rpsa					40432000
tr|A0A1L1SSF8|A0A1L1SSF8_MOUSE;sp|Q91V76|CK054_MOUSE	tr|A0A1L1SSF8|A0A1L1SSF8_MOUSE;sp|Q91V76|CK054_MOUSE	tr|A0A1L1SSF8|A0A1L1SSF8_MOUSE RIKEN cDNA 4931406C07 gene OS=Mus musculus GN=4931406C07Rik PE=1 SV=1;sp|Q91V76|CK054_MOUSE Ester hydrolase C11orf54 homolog OS=Mus musculus PE=1 SV=1							7748300
tr|A0A1L1SUX8|A0A1L1SUX8_MOUSE;tr|Q53YX2|Q53YX2_MOUSE;sp|P01831|THY1_MOUSE	tr|A0A1L1SUX8|A0A1L1SUX8_MOUSE;tr|Q53YX2|Q53YX2_MOUSE;sp|P01831|THY1_MOUSE	tr|A0A1L1SUX8|A0A1L1SUX8_MOUSE Thy-1 membrane glycoprotein (Fragment) OS=Mus musculus GN=Thy1 PE=1 SV=1;tr|Q53YX2|Q53YX2_MOUSE CD90.1 OS=Mus musculus GN=Thy1 PE=2 SV=1;sp|P01831|THY1_MOUSE Thy-1 membrane glycoprotein OS=Mus musculus GN=Thy1 PE=1 SV=1	344575000	604900000	585980000	500760000	450810000	610610000	644230000	596600000	627160000	509290000	577870000	579310000
tr|A0A1V0FXJ9|A0A1V0FXJ9_COWPX;tr|A0A212PRQ1|A0A212PRQ1_COWPX;tr|U5TGT5|U5TGT5_COWPX;tr|U5TDS9|U5TDS9_COWPX;tr|U5TCZ9|U5TCZ9_COWPX;tr|G0XXY0|G0XXY0_COWPX;tr|G0XXB8|G0XXB8_COWPX;tr|G0XWQ7|G0XWQ7_COWPX;tr|G0XVH7|G0XVH7_COWPX;tr|G0XU99|G0XU99_COWPX;tr|A0A212QFD3|A0A212QFD3_COWPX;tr|A0A212PP03|A0A212PP03_COWPX;tr|A0A1X9TAX2|A0A1X9TAX2_COWPX;tr|A0A1X9T9Z9|A0A1X9T9Z9_COWPX;tr|A0A1X9T9A3|A0A1X9T9A3_COWP…	tr|A0A1V0FXJ9|A0A1V0FXJ9_COWPX;tr|A0A212PRQ1|A0A212PRQ1_COWPX;tr|U5TGT5|U5TGT5_COWPX;tr|U5TDS9|U5TDS9_COWPX;tr|U5TCZ9|U5TCZ9_COWPX;tr|G0XXY0|G0XXY0_COWPX;tr|G0XXB8|G0XXB8_COWPX;tr|G0XWQ7|G0XWQ7_COWPX;tr|G0XVH7|G0XVH7_COWPX;tr|G0XU99|G0XU99_COWPX;tr|A0A212QFD3|A0A212QFD3_COWPX;tr|A0A212PP03|A0A212PP03_COWPX;tr|A0A1X9TAX2|A0A1X9TAX2_COWPX;tr|A0A1X9T9Z9|A0A1X9T9Z9_COWPX;tr|A0A1X9T9A3|A0A1X9T9A3_COWP…	tr|A0A1V0FXJ9|A0A1V0FXJ9_COWPX Kelch-like protein OS=Cowpox virus GN=A57R PE=4 SV=1;tr|A0A212PRQ1|A0A212PRQ1_COWPX CPXV193 protein OS=Cowpox virus GN=CPXV193 PE=4 SV=1;tr|U5TGT5|U5TGT5_COWPX CPXV193 protein OS=Cowpox virus GN=CPXV193 PE=4 SV=1;tr|U5TDS9|U5	4128800000							6453200000
tr|A0A1W2P733|A0A1W2P733_MOUSE;tr|Q3TW74|Q3TW74_MOUSE;sp|Q922D8|C1TC_MOUSE;tr|Q3UZH3|Q3UZH3_MOUSE;tr|A0A1W2P7L5|A0A1W2P7L5_MOUSE;tr|Q8BXX7|Q8BXX7_MOUSE	tr|A0A1W2P733|A0A1W2P733_MOUSE;tr|Q3TW74|Q3TW74_MOUSE;sp|Q922D8|C1TC_MOUSE;tr|Q3UZH3|Q3UZH3_MOUSE;tr|A0A1W2P7L5|A0A1W2P7L5_MOUSE;tr|Q8BXX7|Q8BXX7_MOUSE	tr|A0A1W2P733|A0A1W2P733_MOUSE C-1-tetrahydrofolate synthase, cytoplasmic OS=Mus musculus GN=Mthfd1 PE=1 SV=1;tr|Q3TW74|Q3TW74_MOUSE Uncharacterized protein OS=Mus musculus GN=Mthfd1 PE=2 SV=1;sp|Q922D8|C1TC_MOUSE C-1-tetrahydrofolate synthase, cytoplasmic	25971000									45017000
tr|A0A1W2P7Y9|A0A1W2P7Y9_MOUSE;sp|Q810U4|NRCAM_MOUSE;tr|A0A1W2P814|A0A1W2P814_MOUSE;tr|A0A1W2P6P3|A0A1W2P6P3_MOUSE;tr|A0A1W2P7R6|A0A1W2P7R6_MOUSE	tr|A0A1W2P7Y9|A0A1W2P7Y9_MOUSE;sp|Q810U4|NRCAM_MOUSE	tr|A0A1W2P7Y9|A0A1W2P7Y9_MOUSE Neuronal cell adhesion molecule OS=Mus musculus GN=Nrcam PE=1 SV=1;sp|Q810U4|NRCAM_MOUSE Neuronal cell adhesion molecule OS=Mus musculus GN=Nrcam PE=1 SV=2	218535000	601370000	556680000	771640000	223800000	384520000	312800000	310160000	488370000	279320000	272320000	323470000
tr|A0A1Y7VMA0|A0A1Y7VMA0_MOUSE;tr|A0A1Y7VL95|A0A1Y7VL95_MOUSE;sp|Q9JI75|NQO2_MOUSE;tr|Q9CVI1|Q9CVI1_MOUSE;tr|Q9CVF5|Q9CVF5_MOUSE	tr|A0A1Y7VMA0|A0A1Y7VMA0_MOUSE;tr|A0A1Y7VL95|A0A1Y7VL95_MOUSE;sp|Q9JI75|NQO2_MOUSE;tr|Q9CVI1|Q9CVI1_MOUSE;tr|Q9CVF5|Q9CVF5_MOUSE	tr|A0A1Y7VMA0|A0A1Y7VMA0_MOUSE Ribosyldihydronicotinamide dehydrogenase [quinone] (Fragment) OS=Mus musculus GN=Nqo2 PE=1 SV=1;tr|A0A1Y7VL95|A0A1Y7VL95_MOUSE NAD(P)H dehydrogenase, quinone 2, isoform CRA_b OS=Mus musculus GN=Nqo2 PE=1 SV=1;sp|Q9JI75|NQO2_M											3337400
tr|A0A286YCD7|A0A286YCD7_MOUSE;tr|Q8BMC5|Q8BMC5_MOUSE;sp|P55264|ADK_MOUSE;tr|A0A286YCN3|A0A286YCN3_MOUSE	tr|A0A286YCD7|A0A286YCD7_MOUSE;tr|Q8BMC5|Q8BMC5_MOUSE;sp|P55264|ADK_MOUSE	tr|A0A286YCD7|A0A286YCD7_MOUSE Adenosine kinase (Fragment) OS=Mus musculus GN=Adk PE=4 SV=1;tr|Q8BMC5|Q8BMC5_MOUSE Uncharacterized protein OS=Mus musculus GN=Adk PE=2 SV=1;sp|P55264|ADK_MOUSE Adenosine kinase OS=Mus musculus GN=Adk PE=1 SV=2					30892000
tr|A0A509|A0A509_MOUSE;sp|Q9JIF9|MYOTI_MOUSE	tr|A0A509|A0A509_MOUSE;sp|Q9JIF9|MYOTI_MOUSE	tr|A0A509|A0A509_MOUSE MCG4625 OS=Mus musculus GN=Myot PE=1 SV=1;sp|Q9JIF9|MYOTI_MOUSE Myotilin OS=Mus musculus GN=Myot PE=1 SV=1											7597600
tr|A0JLV3|A0JLV3_MOUSE;tr|B2RVD5|B2RVD5_MOUSE;tr|B2RTK3|B2RTK3_MOUSE;sp|Q8CGP2|H2B1P_MOUSE;sp|Q8CGP1|H2B1K_MOUSE;sp|Q6ZWY9|H2B1C_MOUSE;sp|Q64525|H2B2B_MOUSE;sp|Q64478|H2B1H_MOUSE;sp|Q64475|H2B1B_MOUSE;sp|P10854|H2B1M_MOUSE;sp|P10853|H2B1F_MOUSE;tr|Q8CBB6|Q8CBB6_MOUSE;tr|Q921L4|Q921L4_MOUSE;tr|Q8VEE3|Q8VEE3_MOUSE;sp|Q9D2U9|H2B3A_MOUSE;sp|Q8CGP0|H2B3B_MOUSE;sp|Q64524|H2B2E_MOUSE;tr|A0JNS9|A0JNS9_MO…	tr|A0JLV3|A0JLV3_MOUSE;tr|B2RVD5|B2RVD5_MOUSE;tr|B2RTK3|B2RTK3_MOUSE;sp|Q8CGP2|H2B1P_MOUSE;sp|Q8CGP1|H2B1K_MOUSE;sp|Q6ZWY9|H2B1C_MOUSE;sp|Q64525|H2B2B_MOUSE;sp|Q64478|H2B1H_MOUSE;sp|Q64475|H2B1B_MOUSE;sp|P10854|H2B1M_MOUSE;sp|P10853|H2B1F_MOUSE;tr|Q8CBB6|Q8CBB6_MOUSE;tr|Q921L4|Q921L4_MOUSE;tr|Q8VEE3|Q8VEE3_MOUSE;sp|Q9D2U9|H2B3A_MOUSE;sp|Q8CGP0|H2B3B_MOUSE;sp|Q64524|H2B2E_MOUSE;tr|A0JNS9|A0JNS9_MO…	tr|A0JLV3|A0JLV3_MOUSE Histone H2B (Fragment) OS=Mus musculus GN=Hist1h2bj PE=2 SV=1;tr|B2RVD5|B2RVD5_MOUSE Histone H2B OS=Mus musculus GN=Hist1h2bk PE=2 SV=1;tr|B2RTK3|B2RTK3_MOUSE Histone H2B OS=Mus musculus GN=Hist1h2bm PE=1 SV=1;sp|Q8CGP2|H2B1P_MOUSE H					186850000	147450000	131640000				84394000
tr|A0JNU2|A0JNU2_MOUSE;tr|Q4FK61|Q4FK61_MOUSE;tr|Q149G4|Q149G4_MOUSE;tr|Q149G3|Q149G3_MOUSE;sp|O70451|MOT2_MOUSE	tr|A0JNU2|A0JNU2_MOUSE;tr|Q4FK61|Q4FK61_MOUSE;tr|Q149G4|Q149G4_MOUSE;tr|Q149G3|Q149G3_MOUSE;sp|O70451|MOT2_MOUSE	tr|A0JNU2|A0JNU2_MOUSE Slc16a7 protein OS=Mus musculus GN=Slc16a7 PE=2 SV=1;tr|Q4FK61|Q4FK61_MOUSE Slc16a7 protein OS=Mus musculus GN=Slc16a7 PE=2 SV=1;tr|Q149G4|Q149G4_MOUSE Slc16a7 protein OS=Mus musculus GN=Slc16a7 PE=2 SV=1;tr|Q149G3|Q149G3_MOUSE Slc16					6832100
tr|A1BN54|A1BN54_MOUSE;sp|Q7TPR4|ACTN1_MOUSE;tr|Q99LJ3|Q99LJ3_MOUSE;tr|Q8BP35|Q8BP35_MOUSE	tr|A1BN54|A1BN54_MOUSE;sp|Q7TPR4|ACTN1_MOUSE	tr|A1BN54|A1BN54_MOUSE Alpha actinin 1a OS=Mus musculus GN=Actn1 PE=1 SV=1;sp|Q7TPR4|ACTN1_MOUSE Alpha-actinin-1 OS=Mus musculus GN=Actn1 PE=1 SV=1							30031000
tr|A1L3C5|A1L3C5_MOUSE;tr|A0A0R4J207|A0A0R4J207_MOUSE;tr|E9QQ18|E9QQ18_MOUSE;tr|E9QQ17|E9QQ17_MOUSE;sp|Q9JM99|PRG4_MOUSE;tr|E0CZ58|E0CZ58_MOUSE	tr|A1L3C5|A1L3C5_MOUSE;tr|A0A0R4J207|A0A0R4J207_MOUSE;tr|E9QQ18|E9QQ18_MOUSE;tr|E9QQ17|E9QQ17_MOUSE;sp|Q9JM99|PRG4_MOUSE;tr|E0CZ58|E0CZ58_MOUSE	tr|A1L3C5|A1L3C5_MOUSE Prg4 protein OS=Mus musculus GN=Prg4 PE=2 SV=1;tr|A0A0R4J207|A0A0R4J207_MOUSE Proteoglycan 4 OS=Mus musculus GN=Prg4 PE=1 SV=1;tr|E9QQ18|E9QQ18_MOUSE Proteoglycan 4 OS=Mus musculus GN=Prg4 PE=1 SV=1;tr|E9QQ17|E9QQ17_MOUSE Proteoglyca		41539000		60322000		57286000	32687000
tr|A2A4M2|A2A4M2_MOUSE	tr|A2A4M2|A2A4M2_MOUSE	tr|A2A4M2|A2A4M2_MOUSE Predicted gene 11568 OS=Mus musculus GN=Gm11568 PE=4 SV=1					14495000
tr|A2A5N2|A2A5N2_MOUSE;sp|Q9CQV8|1433B_MOUSE;tr|A2A5N1|A2A5N1_MOUSE	tr|A2A5N2|A2A5N2_MOUSE;sp|Q9CQV8|1433B_MOUSE;tr|A2A5N1|A2A5N1_MOUSE	tr|A2A5N2|A2A5N2_MOUSE Tyrosine 3-monooxygenase/tryptophan 5-monooxygenase activation protein, beta polypeptide OS=Mus musculus GN=Ywhab PE=2 SV=1;sp|Q9CQV8|1433B_MOUSE 14-3-3 protein beta/alpha OS=Mus musculus GN=Ywhab PE=1 SV=3;tr|A2A5N1|A2A5N1_MOUSE 14-					43158000		46857000			51330000	50083000
tr|A2A6I8|A2A6I8_MOUSE;tr|A2A6J0|A2A6J0_MOUSE;tr|A0A0R4J1B1|A0A0R4J1B1_MOUSE;tr|A2A6J1|A2A6J1_MOUSE;tr|A2A6H6|A2A6H6_MOUSE;tr|Z4YKH8|Z4YKH8_MOUSE;tr|Z4YKF8|Z4YKF8_MOUSE;tr|Z4YKG3|Z4YKG3_MOUSE;tr|Z4YKE7|Z4YKE7_MOUSE;tr|Z4YKG8|Z4YKG8_MOUSE;tr|Z4YJU0|Z4YJU0_MOUSE;tr|Z4YNB2|Z4YNB2_MOUSE;tr|J3QP61|J3QP61_MOUSE;sp|Q9QZ47|TNNT3_MOUSE;tr|F6RL36|F6RL36_MOUSE;tr|A2A6I5|A2A6I5_MOUSE;tr|A2A6I3|A2A6I3_MOUSE;t…	tr|A2A6I8|A2A6I8_MOUSE;tr|A2A6J0|A2A6J0_MOUSE;tr|A0A0R4J1B1|A0A0R4J1B1_MOUSE;tr|A2A6J1|A2A6J1_MOUSE;tr|A2A6H6|A2A6H6_MOUSE;tr|Z4YKH8|Z4YKH8_MOUSE;tr|Z4YKF8|Z4YKF8_MOUSE;tr|Z4YKG3|Z4YKG3_MOUSE;tr|Z4YKE7|Z4YKE7_MOUSE;tr|Z4YKG8|Z4YKG8_MOUSE;tr|Z4YJU0|Z4YJU0_MOUSE;tr|Z4YNB2|Z4YNB2_MOUSE;tr|J3QP61|J3QP61_MOUSE;sp|Q9QZ47|TNNT3_MOUSE;tr|F6RL36|F6RL36_MOUSE;tr|A2A6I5|A2A6I5_MOUSE;tr|A2A6I3|A2A6I3_MOUSE;t…	tr|A2A6I8|A2A6I8_MOUSE Troponin T, fast skeletal muscle OS=Mus musculus GN=Tnnt3 PE=1 SV=1;tr|A2A6J0|A2A6J0_MOUSE Troponin T, fast skeletal muscle OS=Mus musculus GN=Tnnt3 PE=1 SV=1;tr|A0A0R4J1B1|A0A0R4J1B1_MOUSE Troponin T, fast skeletal muscle OS=Mus mus					18700000						34373000	18302000
tr|A2A6K0|A2A6K0_MOUSE;sp|P13412|TNNI2_MOUSE;tr|A2A6J8|A2A6J8_MOUSE;tr|A0A1B0GRY8|A0A1B0GRY8_MOUSE	tr|A2A6K0|A2A6K0_MOUSE;sp|P13412|TNNI2_MOUSE;tr|A2A6J8|A2A6J8_MOUSE;tr|A0A1B0GRY8|A0A1B0GRY8_MOUSE	tr|A2A6K0|A2A6K0_MOUSE Troponin I, fast skeletal muscle (Fragment) OS=Mus musculus GN=Tnni2 PE=1 SV=1;sp|P13412|TNNI2_MOUSE Troponin I, fast skeletal muscle OS=Mus musculus GN=Tnni2 PE=2 SV=2;tr|A2A6J8|A2A6J8_MOUSE Troponin I, fast skeletal muscle (Fragmen	45255000					37916000					53365000	27033000
tr|A2A997|A2A997_MOUSE;sp|Q8K182|CO8A_MOUSE;tr|A2A998|A2A998_MOUSE;tr|Q8BH67|Q8BH67_MOUSE;tr|Q8K1T7|Q8K1T7_MOUSE	tr|A2A997|A2A997_MOUSE;sp|Q8K182|CO8A_MOUSE;tr|A2A998|A2A998_MOUSE	tr|A2A997|A2A997_MOUSE Complement component C8 alpha chain OS=Mus musculus GN=C8a PE=1 SV=1;sp|Q8K182|CO8A_MOUSE Complement component C8 alpha chain OS=Mus musculus GN=C8a PE=1 SV=1;tr|A2A998|A2A998_MOUSE Complement component C8 alpha chain OS=Mus musculus		99765000	49883000	91850000		60857000	90838000	110900000	95646000	130440000	115460000	142230000
tr|A2AE15|A2AE15_MOUSE;sp|P11680|PROP_MOUSE	tr|A2AE15|A2AE15_MOUSE;sp|P11680|PROP_MOUSE	tr|A2AE15|A2AE15_MOUSE Complement factor properdin OS=Mus musculus GN=Cfp PE=2 SV=1;sp|P11680|PROP_MOUSE Properdin OS=Mus musculus GN=Cfp PE=2 SV=2	19310000	24975000			30342000	30393000	28315000		36646000	34507000	40996000	26466000
tr|A2AEE7|A2AEE7_MOUSE;sp|Q9R0M0|CELR2_MOUSE	tr|A2AEE7|A2AEE7_MOUSE;sp|Q9R0M0|CELR2_MOUSE	tr|A2AEE7|A2AEE7_MOUSE Cadherin EGF LAG seven-pass G-type receptor 2 OS=Mus musculus GN=Celsr2 PE=1 SV=1;sp|Q9R0M0|CELR2_MOUSE Cadherin EGF LAG seven-pass G-type receptor 2 OS=Mus musculus GN=Celsr2 PE=1 SV=2		72204000	74059000	114440000	40076000	80398000	54764000	54141000			27717000	36806000
tr|A2AFL3|A2AFL3_MOUSE;sp|P70699|LYAG_MOUSE	tr|A2AFL3|A2AFL3_MOUSE;sp|P70699|LYAG_MOUSE	tr|A2AFL3|A2AFL3_MOUSE Lysosomal alpha-glucosidase OS=Mus musculus GN=Gaa PE=1 SV=1;sp|P70699|LYAG_MOUSE Lysosomal alpha-glucosidase OS=Mus musculus GN=Gaa PE=1 SV=2							21299000
tr|A2AJ20|A2AJ20_MOUSE;tr|Q925Q2|Q925Q2_MOUSE;sp|Q64322|NPDC1_MOUSE;tr|A2AJ23|A2AJ23_MOUSE;tr|A2AJ19|A2AJ19_MOUSE;tr|A2AJ21|A2AJ21_MOUSE	tr|A2AJ20|A2AJ20_MOUSE;tr|Q925Q2|Q925Q2_MOUSE;sp|Q64322|NPDC1_MOUSE;tr|A2AJ23|A2AJ23_MOUSE	tr|A2AJ20|A2AJ20_MOUSE Neural proliferation differentiation and control protein 1 (Fragment) OS=Mus musculus GN=Npdc1 PE=1 SV=1;tr|Q925Q2|Q925Q2_MOUSE Neural proliferation differentiation control-1 protein OS=Mus musculus GN=Npdc1 PE=4 SV=1;sp|Q64322|NPDC1			39008000	46664000
tr|A2AKU9|A2AKU9_MOUSE;tr|A2AKV1|A2AKV1_MOUSE;tr|A2AKV2|A2AKV2_MOUSE;tr|A2AKV3|A2AKV3_MOUSE;tr|Q8C2Q8|Q8C2Q8_MOUSE;tr|Q9D9D7|Q9D9D7_MOUSE;tr|Q3UD06|Q3UD06_MOUSE;sp|Q91VR2|ATPG_MOUSE;tr|Q9ERA8|Q9ERA8_MOUSE;tr|A2AKV0|A2AKV0_MOUSE	tr|A2AKU9|A2AKU9_MOUSE;tr|A2AKV1|A2AKV1_MOUSE;tr|A2AKV2|A2AKV2_MOUSE;tr|A2AKV3|A2AKV3_MOUSE;tr|Q8C2Q8|Q8C2Q8_MOUSE;tr|Q9D9D7|Q9D9D7_MOUSE;tr|Q3UD06|Q3UD06_MOUSE;sp|Q91VR2|ATPG_MOUSE;tr|Q9ERA8|Q9ERA8_MOUSE;tr|A2AKV0|A2AKV0_MOUSE	tr|A2AKU9|A2AKU9_MOUSE ATP synthase subunit gamma OS=Mus musculus GN=Atp5c1 PE=1 SV=1;tr|A2AKV1|A2AKV1_MOUSE ATP synthase subunit gamma, mitochondrial (Fragment) OS=Mus musculus GN=Atp5c1 PE=1 SV=1;tr|A2AKV2|A2AKV2_MOUSE ATP synthase subunit gamma, mitocho					67505000	98795000	51783000
tr|A2APU5|A2APU5_MOUSE;sp|P48299|EDN3_MOUSE;tr|E0CZ86|E0CZ86_MOUSE	tr|A2APU5|A2APU5_MOUSE;sp|P48299|EDN3_MOUSE;tr|E0CZ86|E0CZ86_MOUSE	tr|A2APU5|A2APU5_MOUSE Endothelin 3 OS=Mus musculus GN=Edn3 PE=2 SV=1;sp|P48299|EDN3_MOUSE Endothelin-3 OS=Mus musculus GN=Edn3 PE=2 SV=1;tr|E0CZ86|E0CZ86_MOUSE Endothelin-3 OS=Mus musculus GN=Edn3 PE=4 SV=1			22012000
tr|A2IXM7|A2IXM7_MOUSE	tr|A2IXM7|A2IXM7_MOUSE	tr|A2IXM7|A2IXM7_MOUSE Anti-CD30 moab Ki-4 scFv (Fragment) OS=Mus musculus PE=2 SV=1	19413000
tr|A2MY50|A2MY50_MOUSE;tr|A0A0B4J1H7|A0A0B4J1H7_MOUSE;tr|I6L998|I6L998_MOUSE;tr|A0A0B4J1H8|A0A0B4J1H8_MOUSE;tr|U5JE44|U5JE44_MOUSE	tr|A2MY50|A2MY50_MOUSE;tr|A0A0B4J1H7|A0A0B4J1H7_MOUSE;tr|I6L998|I6L998_MOUSE;tr|A0A0B4J1H8|A0A0B4J1H8_MOUSE;tr|U5JE44|U5JE44_MOUSE	tr|A2MY50|A2MY50_MOUSE Anti-acid phosphatase variable light chain 11 (Fragment) OS=Mus musculus PE=2 SV=1;tr|A0A0B4J1H7|A0A0B4J1H7_MOUSE Immunoglobulin kappa variable 1-135 (Fragment) OS=Mus musculus GN=Igkv1-135 PE=4 SV=1;tr|I6L998|I6L998_MOUSE Uncharacte											44405000
tr|A2N494|A2N494_MOUSE;tr|B5UB65|B5UB65_MOUSE;tr|B5UB63|B5UB63_MOUSE;tr|B5UB61|B5UB61_MOUSE;tr|A0A140T8M3|A0A140T8M3_MOUSE;tr|A0A0F7W6M8|A0A0F7W6M8_MOUSE	tr|A2N494|A2N494_MOUSE;tr|B5UB65|B5UB65_MOUSE;tr|B5UB63|B5UB63_MOUSE;tr|B5UB61|B5UB61_MOUSE;tr|A0A140T8M3|A0A140T8M3_MOUSE;tr|A0A0F7W6M8|A0A0F7W6M8_MOUSE	tr|A2N494|A2N494_MOUSE Aberrantly recombined kappa chain Vk8/J1 region (Fragment) OS=Mus musculus PE=1 SV=1;tr|B5UB65|B5UB65_MOUSE CP3-10 light chain variable region (Fragment) OS=Mus musculus GN=CP3-10VL PE=2 SV=1;tr|B5UB63|B5UB63_MOUSE CP1-10 light chain				35417000
tr|A2NC20|A2NC20_MOUSE	tr|A2NC20|A2NC20_MOUSE	tr|A2NC20|A2NC20_MOUSE CC49 Fab (Fragment) OS=Mus musculus GN=Igkv8-30 PE=2 SV=1											12746000
tr|A2NHM3|A2NHM3_MOUSE;tr|A2NVX1|A2NVX1_MOUSE	tr|A2NHM3|A2NHM3_MOUSE	tr|A2NHM3|A2NHM3_MOUSE If kappa light chain (Fragment) OS=Mus musculus GN=Igkc PE=1 SV=1	4014950000	2664700000	2976900000	3741400000	2829300000	4136700000	2846400000	4210200000	8665700000	2400200000	5396100000	3829600000
tr|A2NU19|A2NU19_MOUSE;tr|A0A075B5S2|A0A075B5S2_MOUSE	tr|A2NU19|A2NU19_MOUSE;tr|A0A075B5S2|A0A075B5S2_MOUSE	tr|A2NU19|A2NU19_MOUSE VH coding region (Fragment) OS=Mus musculus PE=4 SV=1;tr|A0A075B5S2|A0A075B5S2_MOUSE Immunoglobulin heavy variable 7-1 (Fragment) OS=Mus musculus GN=Ighv7-1 PE=1 SV=2			22700000
tr|A2NW55|A2NW55_MOUSE	tr|A2NW55|A2NW55_MOUSE	tr|A2NW55|A2NW55_MOUSE E8 variable heavy chain (Fragment) OS=Mus musculus PE=2 SV=1								31442000
tr|A2NW56|A2NW56_MOUSE;tr|Q920E6|Q920E6_MOUSE;tr|A0A140T8Q1|A0A140T8Q1_MOUSE;sp|P01635|KV5A3_MOUSE	tr|A2NW56|A2NW56_MOUSE;tr|Q920E6|Q920E6_MOUSE;tr|A0A140T8Q1|A0A140T8Q1_MOUSE;sp|P01635|KV5A3_MOUSE	tr|A2NW56|A2NW56_MOUSE E8 variable light chain (Fragment) OS=Mus musculus PE=2 SV=1;tr|Q920E6|Q920E6_MOUSE Pterin-mimicking anti-idiotope kappa chain variable region (Fragment) OS=Mus musculus PE=4 SV=1;tr|A0A140T8Q1|A0A140T8Q1_MOUSE Protein Igkv12-41 (Fra											9009800
tr|A2NVF0|A2NVF0_MOUSE;tr|A2NVE9|A2NVE9_MOUSE;sp|P01645|KV5AC_MOUSE;sp|P01644|KV5AB_MOUSE;tr|A1A540|A1A540_MOUSE;sp|P01646|KV5AD_MOUSE;tr|A0A140T8M1|A0A140T8M1_MOUSE;sp|P01647|KV5AE_MOUSE;sp|P04946|KV5AM_MOUSE;sp|P01648|KV5AF_MOUSE;tr|A0A075B5L0|A0A075B5L0_MOUSE;sp|P01643|KV5AA_MOUSE	tr|A2NVF0|A2NVF0_MOUSE;tr|A2NVE9|A2NVE9_MOUSE;sp|P01645|KV5AC_MOUSE;sp|P01644|KV5AB_MOUSE;tr|A1A540|A1A540_MOUSE;sp|P01646|KV5AD_MOUSE;tr|A0A140T8M1|A0A140T8M1_MOUSE;sp|P01647|KV5AE_MOUSE	tr|A2NVF0|A2NVF0_MOUSE Immnuoglobulin kappa light chain (Fragment) OS=Mus musculus PE=4 SV=1;tr|A2NVE9|A2NVE9_MOUSE Immnuoglobulin kappa light chain (Fragment) OS=Mus musculus PE=4 SV=1;sp|P01645|KV5AC_MOUSE Ig kappa chain V-V region HP 93G7 OS=Mus musculu	140800000						61026000			195240000	291970000	148980000
tr|A2RS23|A2RS23_MOUSE;sp|Q11136|PEPD_MOUSE	tr|A2RS23|A2RS23_MOUSE;sp|Q11136|PEPD_MOUSE	tr|A2RS23|A2RS23_MOUSE Peptidase D OS=Mus musculus GN=Pepd PE=1 SV=1;sp|Q11136|PEPD_MOUSE Xaa-Pro dipeptidase OS=Mus musculus GN=Pepd PE=1 SV=3	5661500
tr|A2RSN4|A2RSN4_MOUSE;sp|Q8C1Q4|METRN_MOUSE	tr|A2RSN4|A2RSN4_MOUSE;sp|Q8C1Q4|METRN_MOUSE	tr|A2RSN4|A2RSN4_MOUSE Meteorin, glial cell differentiation regulator OS=Mus musculus GN=Metrn PE=2 SV=1;sp|Q8C1Q4|METRN_MOUSE Meteorin OS=Mus musculus GN=Metrn PE=1 SV=2				12141000
tr|A2RSV8|A2RSV8_MOUSE;sp|P19783|COX41_MOUSE;tr|D6RG40|D6RG40_MOUSE;tr|M0QWX7|M0QWX7_MOUSE	tr|A2RSV8|A2RSV8_MOUSE;sp|P19783|COX41_MOUSE	tr|A2RSV8|A2RSV8_MOUSE Cytochrome c oxidase subunit IV isoform 1 OS=Mus musculus GN=Cox4i1 PE=1 SV=1;sp|P19783|COX41_MOUSE Cytochrome c oxidase subunit 4 isoform 1, mitochondrial OS=Mus musculus GN=Cox4i1 PE=1 SV=2						72038000
tr|A2RTA0|A2RTA0_MOUSE;sp|P07310|KCRM_MOUSE;tr|Q9D6U7|Q9D6U7_MOUSE	tr|A2RTA0|A2RTA0_MOUSE;sp|P07310|KCRM_MOUSE;tr|Q9D6U7|Q9D6U7_MOUSE	tr|A2RTA0|A2RTA0_MOUSE Creatine kinase, muscle OS=Mus musculus GN=Ckm PE=1 SV=1;sp|P07310|KCRM_MOUSE Creatine kinase M-type OS=Mus musculus GN=Ckm PE=1 SV=1;tr|Q9D6U7|Q9D6U7_MOUSE Uncharacterized protein OS=Mus musculus GN=Ckm PE=2 SV=1	43762500000	28542000000	11072000000	12668000000	27279000000	23634000000	32092000000	13788000000	15326000000	17834000000	29137000000	27762000000
tr|A2RTI3|A2RTI3_MOUSE;sp|O89017|LGMN_MOUSE;tr|Q3UE99|Q3UE99_MOUSE	tr|A2RTI3|A2RTI3_MOUSE;sp|O89017|LGMN_MOUSE;tr|Q3UE99|Q3UE99_MOUSE	tr|A2RTI3|A2RTI3_MOUSE Legumain OS=Mus musculus GN=Lgmn PE=1 SV=1;sp|O89017|LGMN_MOUSE Legumain OS=Mus musculus GN=Lgmn PE=1 SV=1;tr|Q3UE99|Q3UE99_MOUSE Uncharacterized protein (Fragment) OS=Mus musculus GN=Lgmn PE=2 SV=1						13580000
tr|A3KG36|A3KG36_MOUSE;tr|Q790Y8|Q790Y8_MOUSE;tr|Q3TNL1|Q3TNL1_MOUSE;sp|Q00612|G6PD1_MOUSE	tr|A3KG36|A3KG36_MOUSE;tr|Q790Y8|Q790Y8_MOUSE;tr|Q3TNL1|Q3TNL1_MOUSE;sp|Q00612|G6PD1_MOUSE	tr|A3KG36|A3KG36_MOUSE Glucose-6-phosphate 1-dehydrogenase (Fragment) OS=Mus musculus GN=G6pdx PE=1 SV=1;tr|Q790Y8|Q790Y8_MOUSE Glucose-6-phosphate 1-dehydrogenase OS=Mus musculus GN=G6pdx PE=1 SV=1;tr|Q3TNL1|Q3TNL1_MOUSE Glucose-6-phosphate 1-dehydrogenas
tr|A3KML3|A3KML3_MOUSE;sp|P68254|1433T_MOUSE;tr|F6YY69|F6YY69_MOUSE;tr|F6VW30|F6VW30_MOUSE	tr|A3KML3|A3KML3_MOUSE;sp|P68254|1433T_MOUSE;tr|F6YY69|F6YY69_MOUSE;tr|F6VW30|F6VW30_MOUSE	tr|A3KML3|A3KML3_MOUSE MCG126220 OS=Mus musculus GN=Ywhaq PE=2 SV=1;sp|P68254|1433T_MOUSE 14-3-3 protein theta OS=Mus musculus GN=Ywhaq PE=1 SV=1;tr|F6YY69|F6YY69_MOUSE 14-3-3 protein theta (Fragment) OS=Mus musculus GN=Ywhaq PE=1 SV=1;tr|F6VW30|F6VW30_MOU	56603500				63694000	45211000	41562000	32981000	30882000	53963000	51303000	39426000
tr|A5GZX3|A5GZX3_MOUSE;sp|Q9CPU0|LGUL_MOUSE	tr|A5GZX3|A5GZX3_MOUSE;sp|Q9CPU0|LGUL_MOUSE	tr|A5GZX3|A5GZX3_MOUSE Lactoylglutathione lyase OS=Mus musculus GN=Glo1 PE=1 SV=1;sp|Q9CPU0|LGUL_MOUSE Lactoylglutathione lyase OS=Mus musculus GN=Glo1 PE=1 SV=3	277525000	127950000	135470000	83325000	255180000	161930000	243070000	190070000	118690000	203100000	211500000	230870000
tr|A5JUZ1|A5JUZ1_MOUSE;tr|A0A0A6YW67|A0A0A6YW67_MOUSE;tr|E9Q9J0|E9Q9J0_MOUSE;tr|Q5M9K3|Q5M9K3_MOUSE;sp|P62984|RL40_MOUSE;tr|Q8C2K3|Q8C2K3_MOUSE;tr|Q642L7|Q642L7_MOUSE;sp|P62983|RS27A_MOUSE;tr|E9Q5F6|E9Q5F6_MOUSE;tr|Q922B0|Q922B0_MOUSE;tr|Q5SX22|Q5SX22_MOUSE;tr|Q3TH47|Q3TH47_MOUSE;tr|Q78XY9|Q78XY9_MOUSE;sp|P0CG49|UBB_MOUSE;tr|Q8R0Z9|Q8R0Z9_MOUSE;tr|Q922Z8|Q922Z8_MOUSE;tr|Q8VC46|Q8VC46_MOUSE;sp|P0C…	tr|A5JUZ1|A5JUZ1_MOUSE;tr|A0A0A6YW67|A0A0A6YW67_MOUSE;tr|E9Q9J0|E9Q9J0_MOUSE;tr|Q5M9K3|Q5M9K3_MOUSE;sp|P62984|RL40_MOUSE;tr|Q8C2K3|Q8C2K3_MOUSE;tr|Q642L7|Q642L7_MOUSE;sp|P62983|RS27A_MOUSE;tr|E9Q5F6|E9Q5F6_MOUSE;tr|Q922B0|Q922B0_MOUSE;tr|Q5SX22|Q5SX22_MOUSE;tr|Q3TH47|Q3TH47_MOUSE;tr|Q78XY9|Q78XY9_MOUSE;sp|P0CG49|UBB_MOUSE;tr|Q8R0Z9|Q8R0Z9_MOUSE;tr|Q922Z8|Q922Z8_MOUSE;tr|Q8VC46|Q8VC46_MOUSE;sp|P0C…	tr|A5JUZ1|A5JUZ1_MOUSE Ubiqutin subunit 1 (Fragment) OS=Mus musculus GN=Ubc PE=2 SV=1;tr|A0A0A6YW67|A0A0A6YW67_MOUSE MCG23377, isoform CRA_b OS=Mus musculus GN=Gm8797 PE=4 SV=1;tr|E9Q9J0|E9Q9J0_MOUSE Ubiquitin-60S ribosomal protein L40 (Fragment) OS=Mus mu	751125000	965800000	1150700000	998230000	1234400000	1102700000	1070600000	896100000	1220200000	1230200000	1065800000	1444900000
tr|A6H6H4|A6H6H4_MOUSE;sp|Q6ZWY8|TYB10_MOUSE;tr|A0A0N4SVF0|A0A0N4SVF0_MOUSE	tr|A6H6H4|A6H6H4_MOUSE;sp|Q6ZWY8|TYB10_MOUSE;tr|A0A0N4SVF0|A0A0N4SVF0_MOUSE	tr|A6H6H4|A6H6H4_MOUSE MCG125727 OS=Mus musculus GN=Tmsb10 PE=1 SV=1;sp|Q6ZWY8|TYB10_MOUSE Thymosin beta-10 OS=Mus musculus GN=Tmsb10 PE=1 SV=3;tr|A0A0N4SVF0|A0A0N4SVF0_MOUSE Thymosin beta-10 OS=Mus musculus GN=Tmsb10 PE=1 SV=1									57150000
tr|A6H6K1|A6H6K1_MOUSE;sp|Q99MQ4|ASPN_MOUSE;tr|Q9CTL6|Q9CTL6_MOUSE	tr|A6H6K1|A6H6K1_MOUSE;sp|Q99MQ4|ASPN_MOUSE	tr|A6H6K1|A6H6K1_MOUSE Asporin OS=Mus musculus GN=Aspn PE=1 SV=1;sp|Q99MQ4|ASPN_MOUSE Asporin OS=Mus musculus GN=Aspn PE=1 SV=1					97954000	68783000	130020000	34577000			30221000	36251000
tr|A8DUL0|A8DUL0_MOUSE	tr|A8DUL0|A8DUL0_MOUSE	tr|A8DUL0|A8DUL0_MOUSE Beta-globin OS=Mus musculus GN=Hbbt1 PE=3 SV=1	303985000000	82338000000	146010000000	69284000000	202260000000	131830000000	177170000000	162250000000	92226000000	352110000000	175050000000	288970000000
tr|A8DUP5|A8DUP5_MOUSE	tr|A8DUP5|A8DUP5_MOUSE	tr|A8DUP5|A8DUP5_MOUSE Beta-globin OS=Mus musculus GN=Hbbt1 PE=3 SV=1					10185000
tr|A8DUP7|A8DUP7_MOUSE;tr|D0U270|D0U270_MUSMC;tr|D0U269|D0U269_MUSMC;tr|A8DUK0|A8DUK0_MOUSE;sp|P02088|HBB1_MOUSE;tr|A8DUP3|A8DUP3_MOUSE;tr|D4N6U4|D4N6U4_MUSMC;CON__Q3SX09;CON__P02070	tr|A8DUP7|A8DUP7_MOUSE;tr|D0U270|D0U270_MUSMC;tr|D0U269|D0U269_MUSMC;tr|A8DUK0|A8DUK0_MOUSE;sp|P02088|HBB1_MOUSE;tr|A8DUP3|A8DUP3_MOUSE;tr|D4N6U4|D4N6U4_MUSMC	tr|A8DUP7|A8DUP7_MOUSE Beta-globin OS=Mus musculus GN=Hbbt1 PE=3 SV=1;tr|D0U270|D0U270_MUSMC Beta-globin OS=Mus musculus castaneus GN=Hbbt1 PE=3 SV=1;tr|D0U269|D0U269_MUSMC Beta-globin OS=Mus musculus castaneus GN=Hbbt1 PE=3 SV=1;tr|A8DUK0|A8DUK0_MOUSE Bet	2367700000	587480000	1400000000	508220000	1999800000	1697200000	1761700000	1978200000	1096600000	2604400000	1844600000	3121800000
tr|A8DUQ1|A8DUQ1_MOUSE	tr|A8DUQ1|A8DUQ1_MOUSE	tr|A8DUQ1|A8DUQ1_MOUSE Beta-globin OS=Mus musculus GN=Hbbt1 PE=3 SV=1	44452000000	9743900000	16181000000	8531400000	21279000000	16624000000	25835000000	19059000000	11593000000	44397000000	22203000000	37436000000
tr|A8DUV1|A8DUV1_MOUSE;tr|Q61287|Q61287_MOUSE	tr|A8DUV1|A8DUV1_MOUSE;tr|Q61287|Q61287_MOUSE	tr|A8DUV1|A8DUV1_MOUSE Alpha-globin OS=Mus musculus GN=Hbat1 PE=3 SV=1;tr|Q61287|Q61287_MOUSE Alpha-globin OS=Mus musculus GN=Hbat1 PE=2 SV=1	47872000
tr|A8IP69|A8IP69_MOUSE;sp|P61982|1433G_MOUSE	tr|A8IP69|A8IP69_MOUSE;sp|P61982|1433G_MOUSE	tr|A8IP69|A8IP69_MOUSE 14-3-3 protein gamma subtype OS=Mus musculus GN=Ywhag PE=1 SV=1;sp|P61982|1433G_MOUSE 14-3-3 protein gamma OS=Mus musculus GN=Ywhag PE=1 SV=2	894805000	477570000	311050000	263960000	815540000	574620000	655500000	365690000	344590000	684780000	830190000	588780000
tr|B0QZL1|B0QZL1_MOUSE	tr|B0QZL1|B0QZL1_MOUSE	tr|B0QZL1|B0QZL1_MOUSE Alpha-enolase (Fragment) OS=Mus musculus GN=Eno1 PE=1 SV=1											9059300
tr|B1AQB0|B1AQB0_MOUSE;tr|B1AQA7|B1AQA7_MOUSE;tr|Q9D7P3|Q9D7P3_MOUSE;tr|B1AQB1|B1AQB1_MOUSE;tr|Q0VDW8|Q0VDW8_MOUSE;tr|B1AQB2|B1AQB2_MOUSE;tr|A4IF44|A4IF44_MOUSE;tr|A2A4L9|A2A4L9_MOUSE;CON__Q9BYQ5;tr|B1AQA8|B1AQA8_MOUSE;tr|B1AQA9|B1AQA9_MOUSE;CON__Q9BYR4	tr|B1AQB0|B1AQB0_MOUSE;tr|B1AQA7|B1AQA7_MOUSE;tr|Q9D7P3|Q9D7P3_MOUSE;tr|B1AQB1|B1AQB1_MOUSE;tr|Q0VDW8|Q0VDW8_MOUSE;tr|B1AQB2|B1AQB2_MOUSE;tr|A4IF44|A4IF44_MOUSE;tr|A2A4L9|A2A4L9_MOUSE;CON__Q9BYQ5;tr|B1AQA8|B1AQA8_MOUSE;tr|B1AQA9|B1AQA9_MOUSE	tr|B1AQB0|B1AQB0_MOUSE MCG140213 OS=Mus musculus GN=Gm11596 PE=4 SV=1;tr|B1AQA7|B1AQA7_MOUSE MCG140290 OS=Mus musculus GN=Gm11595 PE=4 SV=1;tr|Q9D7P3|Q9D7P3_MOUSE Keratin-associated protein 4-13 OS=Mus musculus GN=Krtap4-13 PE=2 SV=1;tr|B1AQB1|B1AQB1_MOUSE					337160000
tr|B1AZS9|B1AZS9_MOUSE;sp|O08807|PRDX4_MOUSE	tr|B1AZS9|B1AZS9_MOUSE;sp|O08807|PRDX4_MOUSE	tr|B1AZS9|B1AZS9_MOUSE Peroxiredoxin-4 (Fragment) OS=Mus musculus GN=Prdx4 PE=1 SV=1;sp|O08807|PRDX4_MOUSE Peroxiredoxin-4 OS=Mus musculus GN=Prdx4 PE=1 SV=1									28086000
tr|B1B0C7|B1B0C7_MOUSE;tr|E9PZ16|E9PZ16_MOUSE;tr|Q52KG8|Q52KG8_MOUSE;tr|Q5RKM8|Q5RKM8_MOUSE;sp|Q05793|PGBM_MOUSE;tr|Q3UHH3|Q3UHH3_MOUSE	tr|B1B0C7|B1B0C7_MOUSE;tr|E9PZ16|E9PZ16_MOUSE;tr|Q52KG8|Q52KG8_MOUSE;tr|Q5RKM8|Q5RKM8_MOUSE;sp|Q05793|PGBM_MOUSE;tr|Q3UHH3|Q3UHH3_MOUSE	tr|B1B0C7|B1B0C7_MOUSE Basement membrane-specific heparan sulfate proteoglycan core protein OS=Mus musculus GN=Hspg2 PE=1 SV=1;tr|E9PZ16|E9PZ16_MOUSE Basement membrane-specific heparan sulfate proteoglycan core protein OS=Mus musculus GN=Hspg2 PE=1 SV=1;tr	54477500	66448000	73869000	91045000		54356000	40193000	43888000	53127000	43926000	37469000	37086000
tr|B1Q450|B1Q450_MOUSE	tr|B1Q450|B1Q450_MOUSE	tr|B1Q450|B1Q450_MOUSE Hemoglobin beta chain subunit OS=Mus musculus GN=HBB1 PE=2 SV=1								65707000
tr|B2CQD6|B2CQD6_MOUSE;sp|Q08879|FBLN1_MOUSE;tr|Q3TWK8|Q3TWK8_MOUSE;tr|Q3TW70|Q3TW70_MOUSE;CON__ENSEMBL:ENSBTAP00000016046	tr|B2CQD6|B2CQD6_MOUSE;sp|Q08879|FBLN1_MOUSE;tr|Q3TWK8|Q3TWK8_MOUSE	tr|B2CQD6|B2CQD6_MOUSE Fibulin-1 OS=Mus musculus GN=Fbln1 PE=2 SV=1;sp|Q08879|FBLN1_MOUSE Fibulin-1 OS=Mus musculus GN=Fbln1 PE=1 SV=2;tr|Q3TWK8|Q3TWK8_MOUSE Fibulin-1 OS=Mus musculus GN=Fbln1 PE=2 SV=1	116690000	260600000	252650000	458800000	112120000	171160000	143930000	129960000	169060000	96406000	95407000	73072000
tr|B2M1R6|B2M1R6_MOUSE;tr|Q3U9Q3|Q3U9Q3_MOUSE;tr|Q3U6X2|Q3U6X2_MOUSE;tr|Q3TUA1|Q3TUA1_MOUSE;sp|P61979|HNRPK_MOUSE;tr|Q5FWJ5|Q5FWJ5_MOUSE;tr|Q3TL71|Q3TL71_MOUSE;tr|Q3TG17|Q3TG17_MOUSE;tr|H3BLL4|H3BLL4_MOUSE;tr|Q3TJ38|Q3TJ38_MOUSE;tr|A0A286YDM3|A0A286YDM3_MOUSE;tr|H3BK96|H3BK96_MOUSE;tr|H3BKD0|H3BKD0_MOUSE;tr|H3BKI8|H3BKI8_MOUSE;tr|A0A286YCM2|A0A286YCM2_MOUSE;tr|H3BJS9|H3BJS9_MOUSE;tr|A0A286YDH1|A0…	tr|B2M1R6|B2M1R6_MOUSE;tr|Q3U9Q3|Q3U9Q3_MOUSE;tr|Q3U6X2|Q3U6X2_MOUSE;tr|Q3TUA1|Q3TUA1_MOUSE;sp|P61979|HNRPK_MOUSE;tr|Q5FWJ5|Q5FWJ5_MOUSE;tr|Q3TL71|Q3TL71_MOUSE;tr|Q3TG17|Q3TG17_MOUSE;tr|H3BLL4|H3BLL4_MOUSE;tr|Q3TJ38|Q3TJ38_MOUSE;tr|A0A286YDM3|A0A286YDM3_MOUSE;tr|H3BK96|H3BK96_MOUSE;tr|H3BKD0|H3BKD0_MOUSE;tr|H3BKI8|H3BKI8_MOUSE;tr|A0A286YCM2|A0A286YCM2_MOUSE	tr|B2M1R6|B2M1R6_MOUSE Heterogeneous nuclear ribonucleoprotein K OS=Mus musculus GN=Hnrnpk PE=1 SV=1;tr|Q3U9Q3|Q3U9Q3_MOUSE Uncharacterized protein OS=Mus musculus GN=Hnrnpk PE=2 SV=1;tr|Q3U6X2|Q3U6X2_MOUSE Uncharacterized protein OS=Mus musculus GN=Hnrnpk	25579000				42566000	36158000	27727000	17667000
tr|B2RRE0|B2RRE0_MOUSE;sp|Q9WTQ5|AKA12_MOUSE	tr|B2RRE0|B2RRE0_MOUSE;sp|Q9WTQ5|AKA12_MOUSE	tr|B2RRE0|B2RRE0_MOUSE A kinase (PRKA) anchor protein (Gravin) 12 OS=Mus musculus GN=Akap12 PE=2 SV=1;sp|Q9WTQ5|AKA12_MOUSE A-kinase anchor protein 12 OS=Mus musculus GN=Akap12 PE=1 SV=1					28855000	27112000	25083000
tr|B2RRW2|B2RRW2_MOUSE;sp|O09010|LFNG_MOUSE;tr|Q08EF2|Q08EF2_MOUSE	tr|B2RRW2|B2RRW2_MOUSE;sp|O09010|LFNG_MOUSE;tr|Q08EF2|Q08EF2_MOUSE	tr|B2RRW2|B2RRW2_MOUSE Beta-1,3-N-acetylglucosaminyltransferase OS=Mus musculus GN=Lfng PE=2 SV=1;sp|O09010|LFNG_MOUSE Beta-1,3-N-acetylglucosaminyltransferase lunatic fringe OS=Mus musculus GN=Lfng PE=1 SV=1;tr|Q08EF2|Q08EF2_MOUSE Lfng protein OS=Mus musc			39589000	51560000
tr|B2RSR7|B2RSR7_MOUSE;sp|Q3ULJ0|GPD1L_MOUSE;tr|D3Z0L6|D3Z0L6_MOUSE	tr|B2RSR7|B2RSR7_MOUSE;sp|Q3ULJ0|GPD1L_MOUSE;tr|D3Z0L6|D3Z0L6_MOUSE	tr|B2RSR7|B2RSR7_MOUSE Glycerol-3-phosphate dehydrogenase [NAD(+)] OS=Mus musculus GN=Gpd1l PE=2 SV=1;sp|Q3ULJ0|GPD1L_MOUSE Glycerol-3-phosphate dehydrogenase 1-like protein OS=Mus musculus GN=Gpd1l PE=1 SV=2;tr|D3Z0L6|D3Z0L6_MOUSE Glycerol-3-phosphate deh											11196000
tr|B2RTB6|B2RTB6_MOUSE;sp|P97861|KRT86_MOUSE;tr|Q3TUZ8|Q3TUZ8_MOUSE	tr|B2RTB6|B2RTB6_MOUSE;sp|P97861|KRT86_MOUSE	tr|B2RTB6|B2RTB6_MOUSE Keratin 86 OS=Mus musculus GN=Krt86 PE=2 SV=1;sp|P97861|KRT86_MOUSE Keratin, type II cuticular Hb6 OS=Mus musculus GN=Krt86 PE=2 SV=2					38962000000	813770000	340760000	379210000		288980000
tr|B2RTL6|B2RTL6_MOUSE;sp|Q9Z1T2|TSP4_MOUSE	tr|B2RTL6|B2RTL6_MOUSE;sp|Q9Z1T2|TSP4_MOUSE	tr|B2RTL6|B2RTL6_MOUSE Thrombospondin 4 OS=Mus musculus GN=Thbs4 PE=1 SV=1;sp|Q9Z1T2|TSP4_MOUSE Thrombospondin-4 OS=Mus musculus GN=Thbs4 PE=1 SV=1						9673800
tr|B2RTM0|B2RTM0_MOUSE;sp|P62806|H4_MOUSE;tr|Q61667|Q61667_MOUSE;tr|Q6B822|Q6B822_MOUSE	tr|B2RTM0|B2RTM0_MOUSE;sp|P62806|H4_MOUSE;tr|Q61667|Q61667_MOUSE	tr|B2RTM0|B2RTM0_MOUSE Histone H4 OS=Mus musculus GN=Hist2h4 PE=1 SV=1;sp|P62806|H4_MOUSE Histone H4 OS=Mus musculus GN=Hist1h4a PE=1 SV=2;tr|Q61667|Q61667_MOUSE Histone H4 (Fragment) OS=Mus musculus PE=3 SV=1		65850000			203950000	177470000	135980000	122140000		65511000	66634000
tr|B2RU49|B2RU49_MOUSE;tr|Q9D122|Q9D122_MOUSE;tr|B1AQ85|B1AQ85_MOUSE	tr|B2RU49|B2RU49_MOUSE;tr|Q9D122|Q9D122_MOUSE;tr|B1AQ85|B1AQ85_MOUSE	tr|B2RU49|B2RU49_MOUSE Krtap4-2 protein OS=Mus musculus GN=Krtap4-2 PE=2 SV=1;tr|Q9D122|Q9D122_MOUSE Uncharacterized protein OS=Mus musculus GN=Krtap4-2 PE=2 SV=1;tr|B1AQ85|B1AQ85_MOUSE Keratin-associated protein 4-2 OS=Mus musculus GN=Krtap4-2 PE=4 SV=1					15506000
tr|B2RWX2|B2RWX2_MOUSE;sp|P01029|CO4B_MOUSE;tr|B2RXW7|B2RXW7_MOUSE;tr|V9GZJ5|V9GZJ5_MOUSE;tr|V9GZQ6|V9GZQ6_MOUSE;tr|V9GZG9|V9GZG9_MOUSE;tr|B9EIU2|B9EIU2_MOUSE;tr|Q3TYN1|Q3TYN1_MOUSE;tr|Q3TAT4|Q3TAT4_MOUSE;tr|Q9QUF9|Q9QUF9_MOUSE;tr|Q9Z0D8|Q9Z0D8_MOUSE;tr|V9GZK9|V9GZK9_MOUSE;tr|Q9QUF8|Q9QUF8_MOUSE;tr|Q9Z0J3|Q9Z0J3_MOUSE;tr|Q9QUF7|Q9QUF7_MOUSE;tr|Q62238|Q62238_MOUSE;tr|Q6P3Y0|Q6P3Y0_MOUSE;tr|O88305|…	tr|B2RWX2|B2RWX2_MOUSE;sp|P01029|CO4B_MOUSE;tr|B2RXW7|B2RXW7_MOUSE;tr|V9GZJ5|V9GZJ5_MOUSE;tr|V9GZQ6|V9GZQ6_MOUSE;tr|V9GZG9|V9GZG9_MOUSE;tr|B9EIU2|B9EIU2_MOUSE	tr|B2RWX2|B2RWX2_MOUSE Complement component 4B (Childo blood group) OS=Mus musculus GN=C4b PE=2 SV=1;sp|P01029|CO4B_MOUSE Complement C4-B OS=Mus musculus GN=C4b PE=1 SV=3;tr|B2RXW7|B2RXW7_MOUSE Complement component 4B (Childo blood group) OS=Mus musculus G	1063175000	1382000000	1605700000	1709100000	989890000	1223800000	994200000	1248000000	1815100000	1716500000	1251900000	1400400000
tr|B2RXM1|B2RXM1_MOUSE;tr|B2RWY3|B2RWY3_MOUSE;sp|Q810C1|SLIK1_MOUSE;tr|Q69Z70|Q69Z70_MOUSE	tr|B2RXM1|B2RXM1_MOUSE;tr|B2RWY3|B2RWY3_MOUSE;sp|Q810C1|SLIK1_MOUSE;tr|Q69Z70|Q69Z70_MOUSE	tr|B2RXM1|B2RXM1_MOUSE SLIT and NTRK-like family, member 1 OS=Mus musculus GN=Slitrk1 PE=2 SV=1;tr|B2RWY3|B2RWY3_MOUSE SLIT and NTRK-like family, member 1 OS=Mus musculus GN=Slitrk1 PE=2 SV=1;sp|Q810C1|SLIK1_MOUSE SLIT and NTRK-like protein 1 OS=Mus muscul										8148200
tr|B2RXM2|B2RXM2_MOUSE;tr|Q0VG47|Q0VG47_MOUSE;tr|J3QNY1|J3QNY1_MOUSE;tr|Q6PFA7|Q6PFA7_MOUSE;tr|Q6P6I7|Q6P6I7_MOUSE;tr|A2AL12|A2AL12_MOUSE;tr|Q5FB19|Q5FB19_MOUSE;tr|Q3UZG3|Q3UZG3_MOUSE;sp|Q8BG05|ROA3_MOUSE;tr|Q58E39|Q58E39_MOUSE;tr|Q5U3M2|Q5U3M2_MOUSE;tr|A2AL13|A2AL13_MOUSE	tr|B2RXM2|B2RXM2_MOUSE;tr|Q0VG47|Q0VG47_MOUSE;tr|J3QNY1|J3QNY1_MOUSE;tr|Q6PFA7|Q6PFA7_MOUSE;tr|Q6P6I7|Q6P6I7_MOUSE;tr|A2AL12|A2AL12_MOUSE;tr|Q5FB19|Q5FB19_MOUSE;tr|Q3UZG3|Q3UZG3_MOUSE;sp|Q8BG05|ROA3_MOUSE;tr|Q58E39|Q58E39_MOUSE;tr|Q5U3M2|Q5U3M2_MOUSE	tr|B2RXM2|B2RXM2_MOUSE EG627828 protein OS=Mus musculus GN=Gm6793 PE=1 SV=1;tr|Q0VG47|Q0VG47_MOUSE Heterogeneous nuclear ribonucleoprotein A3 OS=Mus musculus GN=Hnrnpa3 PE=2 SV=1;tr|J3QNY1|J3QNY1_MOUSE Predicted pseudogene 9242 OS=Mus musculus GN=Gm9242 PE					34040000	25589000	25777000		23957000		19122000
tr|B2RXY1|B2RXY1_MOUSE;tr|Q6DIC9|Q6DIC9_MOUSE;tr|Q8BKQ3|Q8BKQ3_MOUSE;sp|Q62288|TICN1_MOUSE;tr|Q8BM19|Q8BM19_MOUSE;tr|A0A087WPP6|A0A087WPP6_MOUSE;tr|A0A286YCI6|A0A286YCI6_MOUSE;tr|Q8BM07|Q8BM07_MOUSE;tr|Q3TPI9|Q3TPI9_MOUSE;sp|Q8BKV0|TICN3_MOUSE;tr|Q571A9|Q571A9_MOUSE	tr|B2RXY1|B2RXY1_MOUSE;tr|Q6DIC9|Q6DIC9_MOUSE;tr|Q8BKQ3|Q8BKQ3_MOUSE;sp|Q62288|TICN1_MOUSE;tr|Q8BM19|Q8BM19_MOUSE;tr|A0A087WPP6|A0A087WPP6_MOUSE	tr|B2RXY1|B2RXY1_MOUSE Spock1 protein OS=Mus musculus GN=Spock1 PE=2 SV=1;tr|Q6DIC9|Q6DIC9_MOUSE Sparc/osteonectin, cwcv and kazal-like domains proteoglycan 1 OS=Mus musculus GN=Spock1 PE=1 SV=1;tr|Q8BKQ3|Q8BKQ3_MOUSE Testican-1 OS=Mus musculus GN=Spock1 P	47295000	79117000	74138000	74027000	42657000	63030000	49606000	54549000	53163000	57366000		52627000
tr|B2RXY7|B2RXY7_MOUSE;sp|P48758|CBR1_MOUSE;tr|A0A1B0GRG8|A0A1B0GRG8_MOUSE	tr|B2RXY7|B2RXY7_MOUSE;sp|P48758|CBR1_MOUSE	tr|B2RXY7|B2RXY7_MOUSE Carbonyl reductase 1 OS=Mus musculus GN=Cbr1 PE=1 SV=1;sp|P48758|CBR1_MOUSE Carbonyl reductase [NADPH] 1 OS=Mus musculus GN=Cbr1 PE=1 SV=3	46411500		30742000		55974000	44173000	37601000	29850000	51689000		34946000	39610000
tr|B2RXZ9|B2RXZ9_MOUSE;sp|Q8VCR8|MYLK2_MOUSE	tr|B2RXZ9|B2RXZ9_MOUSE;sp|Q8VCR8|MYLK2_MOUSE	tr|B2RXZ9|B2RXZ9_MOUSE MCG3723 OS=Mus musculus GN=Mylk2 PE=2 SV=1;sp|Q8VCR8|MYLK2_MOUSE Myosin light chain kinase 2, skeletal/cardiac muscle OS=Mus musculus GN=Mylk2 PE=1 SV=2	46508500						36782000				42199000
tr|B7FAV1|B7FAV1_MOUSE;tr|B9EKP5|B9EKP5_MOUSE;tr|B7FAU9|B7FAU9_MOUSE;sp|Q8BTM8|FLNA_MOUSE;tr|Q6KAM8|Q6KAM8_MOUSE;tr|Q3U7N9|Q3U7N9_MOUSE;tr|F6XC15|F6XC15_MOUSE;sp|Q80X90|FLNB_MOUSE;tr|Q4FZG4|Q4FZG4_MOUSE	tr|B7FAV1|B7FAV1_MOUSE;tr|B9EKP5|B9EKP5_MOUSE;tr|B7FAU9|B7FAU9_MOUSE;sp|Q8BTM8|FLNA_MOUSE;tr|Q6KAM8|Q6KAM8_MOUSE;tr|Q3U7N9|Q3U7N9_MOUSE	tr|B7FAV1|B7FAV1_MOUSE Filamin, alpha (Fragment) OS=Mus musculus GN=Flna PE=1 SV=1;tr|B9EKP5|B9EKP5_MOUSE Filamin, alpha OS=Mus musculus GN=Flna PE=2 SV=1;tr|B7FAU9|B7FAU9_MOUSE Filamin, alpha OS=Mus musculus GN=Flna PE=1 SV=1;sp|Q8BTM8|FLNA_MOUSE Filamin-	38554000				37217000		34315000				23814000
tr|B7ZNH7|B7ZNH7_MOUSE;sp|Q80X19|COEA1_MOUSE;tr|K3W4R4|K3W4R4_MOUSE	tr|B7ZNH7|B7ZNH7_MOUSE;sp|Q80X19|COEA1_MOUSE;tr|K3W4R4|K3W4R4_MOUSE	tr|B7ZNH7|B7ZNH7_MOUSE Collagen alpha-1(XIV) chain OS=Mus musculus GN=Col14a1 PE=1 SV=1;sp|Q80X19|COEA1_MOUSE Collagen alpha-1(XIV) chain OS=Mus musculus GN=Col14a1 PE=1 SV=2;tr|K3W4R4|K3W4R4_MOUSE Collagen alpha-1(XIV) chain OS=Mus musculus GN=Col14a1 PE=							8715900
tr|B7ZNR0|B7ZNR0_MOUSE;tr|Q9QX30|Q9QX30_MOUSE;tr|Q3TDX7|Q3TDX7_MOUSE;sp|Q61508|ECM1_MOUSE;tr|Q9Z2R8|Q9Z2R8_MOUSE;tr|D3Z0U9|D3Z0U9_MOUSE;tr|D3YV22|D3YV22_MOUSE;tr|D3Z038|D3Z038_MOUSE;tr|D3YZV0|D3YZV0_MOUSE	tr|B7ZNR0|B7ZNR0_MOUSE;tr|Q9QX30|Q9QX30_MOUSE;tr|Q3TDX7|Q3TDX7_MOUSE;sp|Q61508|ECM1_MOUSE;tr|Q9Z2R8|Q9Z2R8_MOUSE	tr|B7ZNR0|B7ZNR0_MOUSE Ecm1 protein OS=Mus musculus GN=Ecm1 PE=2 SV=1;tr|Q9QX30|Q9QX30_MOUSE Extracellular matrix protein OS=Mus musculus PE=4 SV=1;tr|Q3TDX7|Q3TDX7_MOUSE Extracellular matrix protein 1 OS=Mus musculus GN=Ecm1 PE=2 SV=1;sp|Q61508|ECM1_MOUSE	144975000	277560000	191060000	289610000	151430000	188620000	195900000	179730000	183730000	127910000	108330000	111170000
tr|B7ZNS9|B7ZNS9_MOUSE;tr|Q3UP47|Q3UP47_MOUSE;sp|P03953|CFAD_MOUSE	tr|B7ZNS9|B7ZNS9_MOUSE;tr|Q3UP47|Q3UP47_MOUSE;sp|P03953|CFAD_MOUSE	tr|B7ZNS9|B7ZNS9_MOUSE Cfd protein OS=Mus musculus GN=Cfd PE=2 SV=1;tr|Q3UP47|Q3UP47_MOUSE Complement factor D (Adipsin) OS=Mus musculus GN=Cfd PE=2 SV=1;sp|P03953|CFAD_MOUSE Complement factor D OS=Mus musculus GN=Cfd PE=1 SV=1	564090000	327290000	210560000	327050000	304400000	166800000	426460000	419610000	284410000	401750000	329500000	251450000
tr|B7ZP22|B7ZP22_MOUSE;sp|O88569|ROA2_MOUSE;tr|A0A0N4SUM2|A0A0N4SUM2_MOUSE	tr|B7ZP22|B7ZP22_MOUSE;sp|O88569|ROA2_MOUSE	tr|B7ZP22|B7ZP22_MOUSE Heterogeneous nuclear ribonucleoprotein A2/B1 OS=Mus musculus GN=Hnrnpa2b1 PE=2 SV=1;sp|O88569|ROA2_MOUSE Heterogeneous nuclear ribonucleoproteins A2/B1 OS=Mus musculus GN=Hnrnpa2b1 PE=1 SV=2	92772000	68119000			204130000	160620000	202790000	71141000	103880000	64030000	94031000	63576000
tr|B8JJN0|B8JJN0_MOUSE;tr|F6VQX8|F6VQX8_MOUSE;tr|Q3UEG8|Q3UEG8_MOUSE;sp|P04186|CFAB_MOUSE;tr|B8JJM5|B8JJM5_MOUSE;tr|F6XQ00|F6XQ00_MOUSE;tr|B8JJM6|B8JJM6_MOUSE;tr|Q3U9W1|Q3U9W1_MOUSE;tr|Q3U925|Q3U925_MOUSE;tr|H3BK95|H3BK95_MOUSE;tr|F6W2T4|F6W2T4_MOUSE;tr|B8JJM3|B8JJM3_MOUSE;tr|Q3UAS8|Q3UAS8_MOUSE;tr|F6WZA2|F6WZA2_MOUSE;CON__Q3KUS7	tr|B8JJN0|B8JJN0_MOUSE;tr|F6VQX8|F6VQX8_MOUSE;tr|Q3UEG8|Q3UEG8_MOUSE;sp|P04186|CFAB_MOUSE;tr|B8JJM5|B8JJM5_MOUSE;tr|F6XQ00|F6XQ00_MOUSE;tr|B8JJM6|B8JJM6_MOUSE;tr|Q3U9W1|Q3U9W1_MOUSE;tr|Q3U925|Q3U925_MOUSE	tr|B8JJN0|B8JJN0_MOUSE Predicted gene 20547 OS=Mus musculus GN=Gm20547 PE=3 SV=1;tr|F6VQX8|F6VQX8_MOUSE Predicted gene 20547 (Fragment) OS=Mus musculus GN=Gm20547 PE=3 SV=1;tr|Q3UEG8|Q3UEG8_MOUSE Complement factor B, isoform CRA_a OS=Mus musculus GN=Cfb PE	615585000	1124900000	1120100000	931500000	774680000	661390000	814070000	1148200000	945250000	783070000	686820000	1001100000
tr|B9EHN0|B9EHN0_MOUSE;sp|Q02053|UBA1_MOUSE;tr|A0A1S6GWH5|A0A1S6GWH5_MOUSE;sp|P31254|UBA1Y_MOUSE	tr|B9EHN0|B9EHN0_MOUSE;sp|Q02053|UBA1_MOUSE;tr|A0A1S6GWH5|A0A1S6GWH5_MOUSE	tr|B9EHN0|B9EHN0_MOUSE Ubiquitin-activating enzyme E1, Chr X OS=Mus musculus GN=Uba1 PE=1 SV=1;sp|Q02053|UBA1_MOUSE Ubiquitin-like modifier-activating enzyme 1 OS=Mus musculus GN=Uba1 PE=1 SV=1;tr|A0A1S6GWH5|A0A1S6GWH5_MOUSE Uncharacterized protein OS=Mus	137605000				136430000	93314000	116060000	49803000	42795000	89108000	114820000	82229000
tr|D2KHZ9|D2KHZ9_MOUSE;sp|P16858|G3P_MOUSE;tr|A0A0A0MQF6|A0A0A0MQF6_MOUSE;tr|S4R1W1|S4R1W1_MOUSE;tr|A0A1D5RLD8|A0A1D5RLD8_MOUSE;tr|S4R257|S4R257_MOUSE;tr|Q3TUZ9|Q3TUZ9_MOUSE;tr|Q4VBD1|Q4VBD1_MOUSE;tr|S4R1W8|S4R1W8_MOUSE;tr|W8QM43|W8QM43_MOUSE;tr|Q6IWE3|Q6IWE3_MOUSE;tr|V9GX06|V9GX06_MOUSE;tr|Q3V2I5|Q3V2I5_MOUSE;tr|A0A0R4J0X7|A0A0R4J0X7_MOUSE;tr|S4R2G5|S4R2G5_MOUSE;sp|Q64467|G3PT_MOUSE;tr|S4R1N5|S4…	tr|D2KHZ9|D2KHZ9_MOUSE;sp|P16858|G3P_MOUSE;tr|A0A0A0MQF6|A0A0A0MQF6_MOUSE;tr|S4R1W1|S4R1W1_MOUSE;tr|A0A1D5RLD8|A0A1D5RLD8_MOUSE;tr|S4R257|S4R257_MOUSE;tr|Q3TUZ9|Q3TUZ9_MOUSE	tr|D2KHZ9|D2KHZ9_MOUSE Glyceraldehyde-3-phosphate dehydrogenase OS=Mus musculus GN=GAPDH PE=2 SV=1;sp|P16858|G3P_MOUSE Glyceraldehyde-3-phosphate dehydrogenase OS=Mus musculus GN=Gapdh PE=1 SV=2;tr|A0A0A0MQF6|A0A0A0MQF6_MOUSE Glyceraldehyde-3-phosphate deh	7995900000	5862700000	2442900000	2921000000	6166900000	7501800000	6754100000	2657300000	6466500000	6303300000	9015800000	5867000000
tr|D3YWF6|D3YWF6_MOUSE;sp|Q7TQI3|OTUB1_MOUSE;tr|D3Z7K0|D3Z7K0_MOUSE	tr|D3YWF6|D3YWF6_MOUSE;sp|Q7TQI3|OTUB1_MOUSE;tr|D3Z7K0|D3Z7K0_MOUSE	tr|D3YWF6|D3YWF6_MOUSE Ubiquitin thioesterase OTUB1 OS=Mus musculus GN=Otub1 PE=1 SV=1;sp|Q7TQI3|OTUB1_MOUSE Ubiquitin thioesterase OTUB1 OS=Mus musculus GN=Otub1 PE=1 SV=2;tr|D3Z7K0|D3Z7K0_MOUSE Ubiquitin thioesterase OTUB1 (Fragment) OS=Mus musculus GN=O					20761000
tr|D3YWR7|D3YWR7_MOUSE;sp|Q8BVI4|DHPR_MOUSE;tr|A0A0G2JGY0|A0A0G2JGY0_MOUSE;tr|A0A0G2JGJ1|A0A0G2JGJ1_MOUSE;tr|D3Z1A1|D3Z1A1_MOUSE;tr|D3Z099|D3Z099_MOUSE	tr|D3YWR7|D3YWR7_MOUSE;sp|Q8BVI4|DHPR_MOUSE;tr|A0A0G2JGY0|A0A0G2JGY0_MOUSE;tr|A0A0G2JGJ1|A0A0G2JGJ1_MOUSE	tr|D3YWR7|D3YWR7_MOUSE Dihydropteridine reductase OS=Mus musculus GN=Qdpr PE=1 SV=1;sp|Q8BVI4|DHPR_MOUSE Dihydropteridine reductase OS=Mus musculus GN=Qdpr PE=1 SV=2;tr|A0A0G2JGY0|A0A0G2JGY0_MOUSE Dihydropteridine reductase OS=Mus musculus GN=Qdpr PE=1 SV=	75899500				55449000		48232000			56545000	53788000	49648000
tr|D3YX09|D3YX09_MOUSE;tr|Q8CF11|Q8CF11_MOUSE;tr|D3Z1Q3|D3Z1Q3_MOUSE;sp|Q8R0P4|AAMDC_MOUSE;tr|D3Z442|D3Z442_MOUSE;tr|D3YZD8|D3YZD8_MOUSE	tr|D3YX09|D3YX09_MOUSE;tr|Q8CF11|Q8CF11_MOUSE;tr|D3Z1Q3|D3Z1Q3_MOUSE;sp|Q8R0P4|AAMDC_MOUSE;tr|D3Z442|D3Z442_MOUSE;tr|D3YZD8|D3YZD8_MOUSE	tr|D3YX09|D3YX09_MOUSE Mth938 domain-containing protein OS=Mus musculus GN=Aamdc PE=1 SV=1;tr|Q8CF11|Q8CF11_MOUSE Mth938 domain-containing protein OS=Mus musculus GN=Aamdc PE=1 SV=1;tr|D3Z1Q3|D3Z1Q3_MOUSE Mth938 domain-containing protein OS=Mus musculus GN								15032000
tr|D3YXF5|D3YXF5_MOUSE	tr|D3YXF5|D3YXF5_MOUSE	tr|D3YXF5|D3YXF5_MOUSE Complement component 7 OS=Mus musculus GN=C7 PE=1 SV=2		201310000	103730000	124700000		131270000	163360000	171880000	223860000	331360000	220980000	221330000
tr|D3YYN7|D3YYN7_MOUSE;tr|Q3UHK5|Q3UHK5_MOUSE;sp|Q6PIE5|AT1A2_MOUSE;tr|Q6ZQ49|Q6ZQ49_MOUSE;tr|Q8R3A9|Q8R3A9_MOUSE;tr|Q8R0B0|Q8R0B0_MOUSE;tr|Q8R3M4|Q8R3M4_MOUSE;tr|Q3UCH8|Q3UCH8_MOUSE;tr|Q8K2R2|Q8K2R2_MOUSE;sp|Q9WV27|AT1A4_MOUSE;tr|Q3UF49|Q3UF49_MOUSE;tr|Q91WH7|Q91WH7_MOUSE;sp|Q64436|ATP4A_MOUSE;tr|E9QNX7|E9QNX7_MOUSE;tr|Q8CGD9|Q8CGD9_MOUSE	tr|D3YYN7|D3YYN7_MOUSE;tr|Q3UHK5|Q3UHK5_MOUSE;sp|Q6PIE5|AT1A2_MOUSE;tr|Q6ZQ49|Q6ZQ49_MOUSE	tr|D3YYN7|D3YYN7_MOUSE Sodium/potassium-transporting ATPase subunit alpha OS=Mus musculus GN=Atp1a2 PE=1 SV=1;tr|Q3UHK5|Q3UHK5_MOUSE Sodium/potassium-transporting ATPase subunit alpha OS=Mus musculus GN=Atp1a2 PE=1 SV=1;sp|Q6PIE5|AT1A2_MOUSE Sodium/potassi		290140000			406680000	674250000	358190000	288930000	364310000	286280000	539420000	145610000
tr|D3YZ06|D3YZ06_MOUSE;tr|Q545F4|Q545F4_MOUSE;sp|P14602|HSPB1_MOUSE;tr|Q9Z2L3|Q9Z2L3_MOUSE	tr|D3YZ06|D3YZ06_MOUSE;tr|Q545F4|Q545F4_MOUSE;sp|P14602|HSPB1_MOUSE	tr|D3YZ06|D3YZ06_MOUSE Heat shock protein beta-1 OS=Mus musculus GN=Hspb1 PE=1 SV=1;tr|Q545F4|Q545F4_MOUSE Hspb1 protein OS=Mus musculus GN=Hspb1 PE=2 SV=1;sp|P14602|HSPB1_MOUSE Heat shock protein beta-1 OS=Mus musculus GN=Hspb1 PE=1 SV=3	90183500				67174000	55904000	42532000			31537000	56773000
tr|D3YZP3|D3YZP3_MOUSE;tr|D3Z2D1|D3Z2D1_MOUSE;sp|P0C192|LRC4B_MOUSE	tr|D3YZP3|D3YZP3_MOUSE;tr|D3Z2D1|D3Z2D1_MOUSE;sp|P0C192|LRC4B_MOUSE	tr|D3YZP3|D3YZP3_MOUSE Leucine-rich repeat-containing protein 4B (Fragment) OS=Mus musculus GN=Lrrc4b PE=1 SV=1;tr|D3Z2D1|D3Z2D1_MOUSE Leucine-rich repeat-containing protein 4B (Fragment) OS=Mus musculus GN=Lrrc4b PE=1 SV=1;sp|P0C192|LRC4B_MOUSE Leucine-ri						21662000
tr|D3Z1M1|D3Z1M1_MOUSE;tr|Q3U9V4|Q3U9V4_MOUSE;sp|P62880|GBB2_MOUSE;tr|D3Z1T4|D3Z1T4_MOUSE;tr|D3YZX3|D3YZX3_MOUSE;tr|Q3U2F9|Q3U2F9_MOUSE;tr|Q3THF3|Q3THF3_MOUSE;sp|P29387|GBB4_MOUSE;tr|E9QKR0|E9QKR0_MOUSE;tr|A0A0A6YVN9|A0A0A6YVN9_MOUSE;tr|V9GWY1|V9GWY1_MOUSE;tr|E9PWM7|E9PWM7_MOUSE;tr|Q3TY18|Q3TY18_MOUSE	tr|D3Z1M1|D3Z1M1_MOUSE;tr|Q3U9V4|Q3U9V4_MOUSE;sp|P62880|GBB2_MOUSE;tr|D3Z1T4|D3Z1T4_MOUSE;tr|D3YZX3|D3YZX3_MOUSE;tr|Q3U2F9|Q3U2F9_MOUSE;tr|Q3THF3|Q3THF3_MOUSE;sp|P29387|GBB4_MOUSE;tr|E9QKR0|E9QKR0_MOUSE	tr|D3Z1M1|D3Z1M1_MOUSE Guanine nucleotide-binding protein G(I)/G(S)/G(T) subunit beta-2 (Fragment) OS=Mus musculus GN=Gnb2 PE=1 SV=1;tr|Q3U9V4|Q3U9V4_MOUSE Guanine nucleotide binding protein, beta 2, isoform CRA_a OS=Mus musculus GN=Gnb2 PE=1 SV=1;sp|P6288											38129000
tr|D3Z1U9|D3Z1U9_MOUSE;tr|D3YUM1|D3YUM1_MOUSE;sp|Q91YT0|NDUV1_MOUSE;tr|D3YXX5|D3YXX5_MOUSE;tr|D3Z0K1|D3Z0K1_MOUSE	tr|D3Z1U9|D3Z1U9_MOUSE;tr|D3YUM1|D3YUM1_MOUSE;sp|Q91YT0|NDUV1_MOUSE	tr|D3Z1U9|D3Z1U9_MOUSE NADH dehydrogenase [ubiquinone] flavoprotein 1, mitochondrial OS=Mus musculus GN=Ndufv1 PE=1 SV=1;tr|D3YUM1|D3YUM1_MOUSE NADH dehydrogenase [ubiquinone] flavoprotein 1, mitochondrial OS=Mus musculus GN=Ndufv1 PE=1 SV=1;sp|Q91YT0|NDUV					23919000	24187000
tr|D3Z396|D3Z396_MOUSE;tr|Q8BG33|Q8BG33_MOUSE;tr|Q3TYC2|Q3TYC2_MOUSE;sp|Q99PJ0|NTRI_MOUSE;tr|F6Z2M6|F6Z2M6_MOUSE;tr|F6RQ26|F6RQ26_MOUSE;tr|Q3USC2|Q3USC2_MOUSE;tr|Q8BMT5|Q8BMT5_MOUSE	tr|D3Z396|D3Z396_MOUSE;tr|Q8BG33|Q8BG33_MOUSE;tr|Q3TYC2|Q3TYC2_MOUSE;sp|Q99PJ0|NTRI_MOUSE;tr|F6Z2M6|F6Z2M6_MOUSE;tr|F6RQ26|F6RQ26_MOUSE;tr|Q3USC2|Q3USC2_MOUSE	tr|D3Z396|D3Z396_MOUSE Neurotrimin OS=Mus musculus GN=Ntm PE=1 SV=1;tr|Q8BG33|Q8BG33_MOUSE Neurotrimin OS=Mus musculus GN=Ntm PE=1 SV=1;tr|Q3TYC2|Q3TYC2_MOUSE Uncharacterized protein OS=Mus musculus GN=Ntm PE=2 SV=1;sp|Q99PJ0|NTRI_MOUSE Neurotrimin OS=Mus	277695000	493710000	586360000	618510000	251640000	296100000	272460000	336650000	375580000	328740000	217280000	290570000
tr|D3Z4S6|D3Z4S6_MOUSE;sp|Q922P8|T132A_MOUSE	tr|D3Z4S6|D3Z4S6_MOUSE;sp|Q922P8|T132A_MOUSE	tr|D3Z4S6|D3Z4S6_MOUSE Transmembrane protein 132A OS=Mus musculus GN=Tmem132a PE=1 SV=1;sp|Q922P8|T132A_MOUSE Transmembrane protein 132A OS=Mus musculus GN=Tmem132a PE=1 SV=2			5368900
tr|D3Z4T6|D3Z4T6_MOUSE;tr|A0A4W9|A0A4W9_MOUSE;sp|Q80Z24|NEGR1_MOUSE	tr|D3Z4T6|D3Z4T6_MOUSE;tr|A0A4W9|A0A4W9_MOUSE;sp|Q80Z24|NEGR1_MOUSE	tr|D3Z4T6|D3Z4T6_MOUSE Neuronal growth regulator 1 OS=Mus musculus GN=Negr1 PE=1 SV=1;tr|A0A4W9|A0A4W9_MOUSE Neuronal growth regulator 1 OS=Mus musculus GN=Negr1 PE=1 SV=1;sp|Q80Z24|NEGR1_MOUSE Neuronal growth regulator 1 OS=Mus musculus GN=Negr1 PE=1 SV=1				20004000
tr|D3Z566|D3Z566_MOUSE;sp|Q8BT18|CN037_MOUSE	tr|D3Z566|D3Z566_MOUSE;sp|Q8BT18|CN037_MOUSE	tr|D3Z566|D3Z566_MOUSE RIKEN cDNA 3632451O06 gene OS=Mus musculus GN=3632451O06Rik PE=1 SV=1;sp|Q8BT18|CN037_MOUSE Uncharacterized protein C14orf37 homolog OS=Mus musculus PE=2 SV=2				12647000
tr|D3Z598|D3Z598_MOUSE;tr|E9QPS5|E9QPS5_MOUSE;tr|B2RU79|B2RU79_MOUSE;sp|Q8K4G1|LTBP4_MOUSE;tr|Q3UGU1|Q3UGU1_MOUSE;tr|E9Q6B8|E9Q6B8_MOUSE;tr|F6W6Z0|F6W6Z0_MOUSE;tr|Q8BXY5|Q8BXY5_MOUSE	tr|D3Z598|D3Z598_MOUSE;tr|E9QPS5|E9QPS5_MOUSE;tr|B2RU79|B2RU79_MOUSE;sp|Q8K4G1|LTBP4_MOUSE;tr|Q3UGU1|Q3UGU1_MOUSE;tr|E9Q6B8|E9Q6B8_MOUSE	tr|D3Z598|D3Z598_MOUSE Latent-transforming growth factor beta-binding protein 4 OS=Mus musculus GN=Ltbp4 PE=1 SV=1;tr|E9QPS5|E9QPS5_MOUSE Latent-transforming growth factor beta-binding protein 4 OS=Mus musculus GN=Ltbp4 PE=1 SV=1;tr|B2RU79|B2RU79_MOUSE Lat		55167000	52098000	55914000
tr|D3Z5G7|D3Z5G7_MOUSE;tr|Q3UW56|Q3UW56_MOUSE;sp|Q8VCC2|EST1_MOUSE	tr|D3Z5G7|D3Z5G7_MOUSE	tr|D3Z5G7|D3Z5G7_MOUSE Carboxylic ester hydrolase OS=Mus musculus GN=Ces1b PE=1 SV=1	46424000	44467000	44080000	37282000				52688000
tr|D3Z601|D3Z601_MOUSE;sp|Q99JH7|CSTN3_MOUSE;tr|A0A0N4SW90|A0A0N4SW90_MOUSE	tr|D3Z601|D3Z601_MOUSE;sp|Q99JH7|CSTN3_MOUSE	tr|D3Z601|D3Z601_MOUSE Calsyntenin-3 OS=Mus musculus GN=Clstn3 PE=1 SV=1;sp|Q99JH7|CSTN3_MOUSE Calsyntenin-3 OS=Mus musculus GN=Clstn3 PE=1 SV=1		160440000			108560000	165460000	144790000			123820000
tr|D3Z7C6|D3Z7C6_MOUSE;tr|Q9CRH1|Q9CRH1_MOUSE;tr|Q3TJG6|Q3TJG6_MOUSE;sp|Q9R0Q7|TEBP_MOUSE	tr|D3Z7C6|D3Z7C6_MOUSE;tr|Q9CRH1|Q9CRH1_MOUSE;tr|Q3TJG6|Q3TJG6_MOUSE;sp|Q9R0Q7|TEBP_MOUSE	tr|D3Z7C6|D3Z7C6_MOUSE Prostaglandin E synthase 3 OS=Mus musculus GN=Ptges3 PE=1 SV=1;tr|Q9CRH1|Q9CRH1_MOUSE Uncharacterized protein OS=Mus musculus GN=Ptges3 PE=2 SV=2;tr|Q3TJG6|Q3TJG6_MOUSE Uncharacterized protein OS=Mus musculus GN=Ptges3 PE=2 SV=1;sp|Q										59253000
tr|D6RCG1|D6RCG1_MOUSE;tr|Q3TH49|Q3TH49_MOUSE;tr|Q3UJP8|Q3UJP8_MOUSE;sp|Q64737|PUR2_MOUSE	tr|D6RCG1|D6RCG1_MOUSE;tr|Q3TH49|Q3TH49_MOUSE;tr|Q3UJP8|Q3UJP8_MOUSE;sp|Q64737|PUR2_MOUSE	tr|D6RCG1|D6RCG1_MOUSE Trifunctional purine biosynthetic protein adenosine-3 OS=Mus musculus GN=Gart PE=1 SV=1;tr|Q3TH49|Q3TH49_MOUSE Uncharacterized protein OS=Mus musculus GN=Gart PE=2 SV=1;tr|Q3UJP8|Q3UJP8_MOUSE Trifunctional purine biosynthetic protein	21411000
tr|D6REG4|D6REG4_MOUSE;tr|Q3T9Z2|Q3T9Z2_MOUSE;sp|Q91Z53|GRHPR_MOUSE	tr|D6REG4|D6REG4_MOUSE;tr|Q3T9Z2|Q3T9Z2_MOUSE;sp|Q91Z53|GRHPR_MOUSE	tr|D6REG4|D6REG4_MOUSE Glyoxylate reductase/hydroxypyruvate reductase OS=Mus musculus GN=Grhpr PE=1 SV=1;tr|Q3T9Z2|Q3T9Z2_MOUSE Glyoxylate reductase/hydroxypyruvate reductase OS=Mus musculus GN=Grhpr PE=1 SV=1;sp|Q91Z53|GRHPR_MOUSE Glyoxylate reductase/hyd	40661000	38095000			50436000		39690000			28387000	44476000	37583000
tr|E0CXN5|E0CXN5_MOUSE;sp|P13707|GPDA_MOUSE	tr|E0CXN5|E0CXN5_MOUSE;sp|P13707|GPDA_MOUSE	tr|E0CXN5|E0CXN5_MOUSE Glycerol-3-phosphate dehydrogenase [NAD(+)] OS=Mus musculus GN=Gpd1 PE=1 SV=1;sp|P13707|GPDA_MOUSE Glycerol-3-phosphate dehydrogenase [NAD(+)], cytoplasmic OS=Mus musculus GN=Gpd1 PE=1 SV=3	523380000	208500000	171870000	47425000	277880000	171030000	260580000	56651000	106190000	103980000	226480000	255630000
tr|E0CY01|E0CY01_MOUSE;sp|Q5MJS3|FA20C_MOUSE	tr|E0CY01|E0CY01_MOUSE;sp|Q5MJS3|FA20C_MOUSE	tr|E0CY01|E0CY01_MOUSE Extracellular serine/threonine protein kinase FAM20C OS=Mus musculus GN=Fam20c PE=1 SV=1;sp|Q5MJS3|FA20C_MOUSE Extracellular serine/threonine protein kinase FAM20C OS=Mus musculus GN=Fam20c PE=1 SV=1				31093000
tr|E0CY11|E0CY11_MOUSE;sp|Q9CS84|NRX1A_MOUSE;tr|H3BK93|H3BK93_MOUSE;tr|E0CZA5|E0CZA5_MOUSE;tr|A0A0H2UH29|A0A0H2UH29_MOUSE;sp|P0DI97|NRX1B_MOUSE;tr|G3UWQ9|G3UWQ9_MOUSE;tr|A0A0G2JE40|A0A0G2JE40_MOUSE	tr|E0CY11|E0CY11_MOUSE;sp|Q9CS84|NRX1A_MOUSE;tr|H3BK93|H3BK93_MOUSE	tr|E0CY11|E0CY11_MOUSE Neurexin-1 OS=Mus musculus GN=Nrxn1 PE=1 SV=2;sp|Q9CS84|NRX1A_MOUSE Neurexin-1 OS=Mus musculus GN=Nrxn1 PE=1 SV=3;tr|H3BK93|H3BK93_MOUSE Neurexin-1 (Fragment) OS=Mus musculus GN=Nrxn1 PE=1 SV=2				28994000
tr|E0CYW7|E0CYW7_MOUSE;tr|E0CXA0|E0CXA0_MOUSE;sp|P51859|HDGF_MOUSE	tr|E0CYW7|E0CYW7_MOUSE;tr|E0CXA0|E0CXA0_MOUSE;sp|P51859|HDGF_MOUSE	tr|E0CYW7|E0CYW7_MOUSE Hepatoma-derived growth factor OS=Mus musculus GN=Hdgf PE=1 SV=1;tr|E0CXA0|E0CXA0_MOUSE Hepatoma-derived growth factor (Fragment) OS=Mus musculus GN=Hdgf PE=1 SV=1;sp|P51859|HDGF_MOUSE Hepatoma-derived growth factor OS=Mus musculus G											8010200
tr|E0CZ27|E0CZ27_MOUSE;sp|P84244|H33_MOUSE;sp|P02301|H3C_MOUSE;tr|A1L0U3|A1L0U3_MOUSE;tr|F8WI35|F8WI35_MOUSE;tr|A1L0V4|A1L0V4_MOUSE;tr|B9EI85|B9EI85_MOUSE;sp|P84228|H32_MOUSE;sp|P68433|H31_MOUSE;tr|A0A1W2P768|A0A1W2P768_MOUSE	tr|E0CZ27|E0CZ27_MOUSE;sp|P84244|H33_MOUSE;sp|P02301|H3C_MOUSE;tr|A1L0U3|A1L0U3_MOUSE;tr|F8WI35|F8WI35_MOUSE;tr|A1L0V4|A1L0V4_MOUSE;tr|B9EI85|B9EI85_MOUSE;sp|P84228|H32_MOUSE;sp|P68433|H31_MOUSE;tr|A0A1W2P768|A0A1W2P768_MOUSE	tr|E0CZ27|E0CZ27_MOUSE Histone H3 (Fragment) OS=Mus musculus GN=H3f3a PE=3 SV=1;sp|P84244|H33_MOUSE Histone H3.3 OS=Mus musculus GN=H3f3a PE=1 SV=2;sp|P02301|H3C_MOUSE Histone H3.3C OS=Mus musculus GN=H3f3c PE=3 SV=3;tr|A1L0U3|A1L0U3_MOUSE Histone H3 (Frag					66438000	58767000	47827000				50905000
tr|E0CZ88|E0CZ88_MOUSE;tr|E0CYN7|E0CYN7_MOUSE;tr|A0A0N4SVY3|A0A0N4SVY3_MOUSE;sp|Q6P1B3|PIANP_MOUSE	tr|E0CZ88|E0CZ88_MOUSE;tr|E0CYN7|E0CYN7_MOUSE;tr|A0A0N4SVY3|A0A0N4SVY3_MOUSE;sp|Q6P1B3|PIANP_MOUSE	tr|E0CZ88|E0CZ88_MOUSE PILR alpha-associated neural protein (Fragment) OS=Mus musculus GN=Pianp PE=4 SV=1;tr|E0CYN7|E0CYN7_MOUSE PILR alpha-associated neural protein (Fragment) OS=Mus musculus GN=Pianp PE=4 SV=1;tr|A0A0N4SVY3|A0A0N4SVY3_MOUSE PILR alpha-as						148290000
tr|E9PUM5|E9PUM5_MOUSE;tr|B2RUG5|B2RUG5_MOUSE;tr|Q0KHD3|Q0KHD3_MOUSE;tr|E9Q8B5|E9Q8B5_MOUSE;tr|Q0KHD2|Q0KHD2_MOUSE;tr|E9Q8B6|E9Q8B6_MOUSE	tr|E9PUM5|E9PUM5_MOUSE;tr|B2RUG5|B2RUG5_MOUSE;tr|Q0KHD3|Q0KHD3_MOUSE;tr|E9Q8B5|E9Q8B5_MOUSE;tr|Q0KHD2|Q0KHD2_MOUSE;tr|E9Q8B6|E9Q8B6_MOUSE	tr|E9PUM5|E9PUM5_MOUSE Predicted gene 4788 OS=Mus musculus GN=Gm4788 PE=1 SV=1;tr|B2RUG5|B2RUG5_MOUSE EG214403 protein OS=Mus musculus GN=Gm4788 PE=2 SV=1;tr|Q0KHD3|Q0KHD3_MOUSE Complement factor H-related protein C OS=Mus musculus GN=Gm4788 PE=2 SV=1;tr|E							3128700
tr|E9PVM7|E9PVM7_MOUSE;sp|P48774|GSTM5_MOUSE;tr|E9PV63|E9PV63_MOUSE;tr|E9Q024|E9Q024_MOUSE	tr|E9PVM7|E9PVM7_MOUSE;sp|P48774|GSTM5_MOUSE;tr|E9PV63|E9PV63_MOUSE	tr|E9PVM7|E9PVM7_MOUSE Glutathione S-transferase (Fragment) OS=Mus musculus GN=Gstm5 PE=1 SV=1;sp|P48774|GSTM5_MOUSE Glutathione S-transferase Mu 5 OS=Mus musculus GN=Gstm5 PE=1 SV=1;tr|E9PV63|E9PV63_MOUSE Glutathione S-transferase Mu 5 OS=Mus musculus GN=					8237900
tr|E9PX70|E9PX70_MOUSE;sp|Q60847|COCA1_MOUSE;tr|Q3TNZ7|Q3TNZ7_MOUSE;tr|F6WIM8|F6WIM8_MOUSE	tr|E9PX70|E9PX70_MOUSE;sp|Q60847|COCA1_MOUSE	tr|E9PX70|E9PX70_MOUSE Collagen alpha-1(XII) chain OS=Mus musculus GN=Col12a1 PE=1 SV=1;sp|Q60847|COCA1_MOUSE Collagen alpha-1(XII) chain OS=Mus musculus GN=Col12a1 PE=2 SV=3		25251000			322040000	48610000	137030000	65713000	30441000		16815000
tr|E9PYJ9|E9PYJ9_MOUSE;sp|Q9JKS4|LDB3_MOUSE;tr|B4DUL3|B4DUL3_HUMAN	tr|E9PYJ9|E9PYJ9_MOUSE;sp|Q9JKS4|LDB3_MOUSE;tr|B4DUL3|B4DUL3_HUMAN	tr|E9PYJ9|E9PYJ9_MOUSE LIM domain-binding protein 3 OS=Mus musculus GN=Ldb3 PE=1 SV=1;sp|Q9JKS4|LDB3_MOUSE LIM domain-binding protein 3 OS=Mus musculus GN=Ldb3 PE=1 SV=1;tr|B4DUL3|B4DUL3_HUMAN cDNA FLJ53661, highly similar to Mus musculus LIM domain bindin	43171000				18454000	49753000	19858000				95170000
tr|E9PZ58|E9PZ58_MOUSE;sp|P97355|SPSY_MOUSE	tr|E9PZ58|E9PZ58_MOUSE;sp|P97355|SPSY_MOUSE	tr|E9PZ58|E9PZ58_MOUSE Spermine synthase OS=Mus musculus GN=Sms PE=1 SV=1;sp|P97355|SPSY_MOUSE Spermine synthase OS=Mus musculus GN=Sms PE=1 SV=1					3379300
tr|E9PZW0|E9PZW0_MOUSE;sp|E9Q557|DESP_MOUSE;tr|Q8BP77|Q8BP77_MOUSE	tr|E9PZW0|E9PZW0_MOUSE;sp|E9Q557|DESP_MOUSE;tr|Q8BP77|Q8BP77_MOUSE	tr|E9PZW0|E9PZW0_MOUSE Desmoplakin OS=Mus musculus GN=Dsp PE=1 SV=1;sp|E9Q557|DESP_MOUSE Desmoplakin OS=Mus musculus GN=Dsp PE=1 SV=1;tr|Q8BP77|Q8BP77_MOUSE Uncharacterized protein OS=Mus musculus GN=Dsp PE=2 SV=1								6368300
tr|E9Q1Y9|E9Q1Y9_MOUSE;CON__Q61726;tr|Q61726|Q61726_MOUSE;CON__Q9NSB4	tr|E9Q1Y9|E9Q1Y9_MOUSE;CON__Q61726;tr|Q61726|Q61726_MOUSE	tr|E9Q1Y9|E9Q1Y9_MOUSE Keratin 83 OS=Mus musculus GN=Krt83 PE=1 SV=1;;tr|Q61726|Q61726_MOUSE Keratin type II (Fragment) OS=Mus musculus GN=Krt83 PE=2 SV=1					2871900000		30179000
tr|E9Q242|E9Q242_MOUSE;tr|Q3TMB8|Q3TMB8_MOUSE;sp|P54822|PUR8_MOUSE;tr|E9Q3T7|E9Q3T7_MOUSE;tr|A0A140LHU1|A0A140LHU1_MOUSE	tr|E9Q242|E9Q242_MOUSE;tr|Q3TMB8|Q3TMB8_MOUSE;sp|P54822|PUR8_MOUSE;tr|E9Q3T7|E9Q3T7_MOUSE	tr|E9Q242|E9Q242_MOUSE Adenylosuccinate lyase OS=Mus musculus GN=Adsl PE=1 SV=1;tr|Q3TMB8|Q3TMB8_MOUSE Adenylosuccinate lyase OS=Mus musculus GN=Adsl PE=2 SV=1;sp|P54822|PUR8_MOUSE Adenylosuccinate lyase OS=Mus musculus GN=Adsl PE=1 SV=2;tr|E9Q3T7|E9Q3T7_M	52040000	38248000			30267000	41738000	41841000			38300000	23340000	34153000
tr|E9Q2E9|E9Q2E9_MOUSE	tr|E9Q2E9|E9Q2E9_MOUSE	tr|E9Q2E9|E9Q2E9_MOUSE Keratin-associated protein 11-1 OS=Mus musculus GN=Krtap11-1 PE=1 SV=1					189230000
tr|E9Q2T3|E9Q2T3_MOUSE;tr|O35452|O35452_MOUSE;tr|Q3V5L4|Q3V5L4_MOUSE;tr|O54796|O54796_MOUSE;tr|Q3TAQ2|Q3TAQ2_MOUSE;tr|Q62308|Q62308_MOUSE;tr|A1L0S4|A1L0S4_MOUSE;tr|A0A0G2JE11|A0A0G2JE11_MOUSE;tr|Q8CH41|Q8CH41_MOUSE;tr|A2ACU7|A2ACU7_MOUSE;tr|A0A0R4J176|A0A0R4J176_MOUSE;tr|Q3ULU4|Q3ULU4_MOUSE;tr|A3KG28|A3KG28_MOUSE;sp|Q8CH40|NUDT6_MOUSE	tr|E9Q2T3|E9Q2T3_MOUSE;tr|O35452|O35452_MOUSE;tr|Q3V5L4|Q3V5L4_MOUSE;tr|O54796|O54796_MOUSE;tr|Q3TAQ2|Q3TAQ2_MOUSE;tr|Q62308|Q62308_MOUSE	tr|E9Q2T3|E9Q2T3_MOUSE Tenascin XB OS=Mus musculus GN=Tnxb PE=1 SV=1;tr|O35452|O35452_MOUSE Tenascin X OS=Mus musculus GN=Tnxb PE=1 SV=1;tr|Q3V5L4|Q3V5L4_MOUSE Tenascin-X OS=Mus musculus GN=Tnxb PE=2 SV=1;tr|O54796|O54796_MOUSE Tenascin-X OS=Mus musculus G					103250000	35592000
tr|E9Q2X2|E9Q2X2_MOUSE;sp|Q6P9K9|NRX3A_MOUSE;tr|A0A087WPQ9|A0A087WPQ9_MOUSE;tr|Q6ZQ56|Q6ZQ56_MOUSE;sp|Q8C985|NRX3B_MOUSE;tr|Q3UEY9|Q3UEY9_MOUSE;tr|E9Q3Q4|E9Q3Q4_MOUSE	tr|E9Q2X2|E9Q2X2_MOUSE;sp|Q6P9K9|NRX3A_MOUSE;tr|A0A087WPQ9|A0A087WPQ9_MOUSE;tr|Q6ZQ56|Q6ZQ56_MOUSE	tr|E9Q2X2|E9Q2X2_MOUSE Neurexin-3-beta OS=Mus musculus GN=Nrxn3 PE=1 SV=1;sp|Q6P9K9|NRX3A_MOUSE Neurexin-3 OS=Mus musculus GN=Nrxn3 PE=1 SV=2;tr|A0A087WPQ9|A0A087WPQ9_MOUSE Neurexin-3-beta OS=Mus musculus GN=Nrxn3 PE=1 SV=1;tr|Q6ZQ56|Q6ZQ56_MOUSE MKIAA0743		40413000		82910000			25132000		31622000	26373000		21332000
tr|E9Q397|E9Q397_MOUSE;tr|Q3UGY4|Q3UGY4_MOUSE;tr|Q3UGX2|Q3UGX2_MOUSE;tr|B2RX08|B2RX08_MOUSE;sp|P15508|SPTB1_MOUSE;tr|Q5DTG9|Q5DTG9_MOUSE;tr|Q149M1|Q149M1_MOUSE	tr|E9Q397|E9Q397_MOUSE;tr|Q3UGY4|Q3UGY4_MOUSE;tr|Q3UGX2|Q3UGX2_MOUSE;tr|B2RX08|B2RX08_MOUSE;sp|P15508|SPTB1_MOUSE	tr|E9Q397|E9Q397_MOUSE Spectrin beta chain OS=Mus musculus GN=Sptb PE=1 SV=1;tr|Q3UGY4|Q3UGY4_MOUSE Spectrin beta chain OS=Mus musculus GN=Sptb PE=2 SV=1;tr|Q3UGX2|Q3UGX2_MOUSE Spectrin beta chain OS=Mus musculus GN=Sptb PE=1 SV=1;tr|B2RX08|B2RX08_MOUSE Sp	176125000					173130000		42900000	46303000	701660000	217690000	419160000
tr|E9Q3W4|E9Q3W4_MOUSE;tr|Q6S390|Q6S390_MOUSE;tr|Q6S388|Q6S388_MOUSE;tr|Q6S392|Q6S392_MOUSE;tr|Q6S393|Q6S393_MOUSE;tr|Q6S387|Q6S387_MOUSE;tr|Q6S385|Q6S385_MOUSE;sp|Q9QXS1|PLEC_MOUSE;tr|F6R059|F6R059_MOUSE;tr|E9PW24|E9PW24_MOUSE;tr|A0A0R4J223|A0A0R4J223_MOUSE;tr|Q05CR3|Q05CR3_MOUSE;tr|Q8C8S5|Q8C8S5_MOUSE;tr|E9Q9J6|E9Q9J6_MOUSE;tr|A0A0R4J221|A0A0R4J221_MOUSE;tr|Q499F9|Q499F9_MOUSE;tr|A0A0R4J218|A0A…	tr|E9Q3W4|E9Q3W4_MOUSE;tr|Q6S390|Q6S390_MOUSE;tr|Q6S388|Q6S388_MOUSE;tr|Q6S392|Q6S392_MOUSE;tr|Q6S393|Q6S393_MOUSE;tr|Q6S387|Q6S387_MOUSE;tr|Q6S385|Q6S385_MOUSE;sp|Q9QXS1|PLEC_MOUSE	tr|E9Q3W4|E9Q3W4_MOUSE Plectin OS=Mus musculus GN=Plec PE=1 SV=1;tr|Q6S390|Q6S390_MOUSE Plectin 4 OS=Mus musculus GN=Plec PE=2 SV=1;tr|Q6S388|Q6S388_MOUSE Plectin 7 OS=Mus musculus GN=Plec PE=2 SV=1;tr|Q6S392|Q6S392_MOUSE Plectin 3 OS=Mus musculus GN=Plec					59384000
tr|E9Q440|E9Q440_MOUSE	tr|E9Q440|E9Q440_MOUSE	tr|E9Q440|E9Q440_MOUSE Protein HEG homolog 1 OS=Mus musculus GN=Heg1 PE=1 SV=1									14270000
tr|E9Q4G8|E9Q4G8_MOUSE;tr|E9Q3Q6|E9Q3Q6_MOUSE;tr|Q54AJ5|Q54AJ5_MOUSE;sp|Q61490|CD166_MOUSE;tr|F6QH25|F6QH25_MOUSE	tr|E9Q4G8|E9Q4G8_MOUSE;tr|E9Q3Q6|E9Q3Q6_MOUSE;tr|Q54AJ5|Q54AJ5_MOUSE;sp|Q61490|CD166_MOUSE;tr|F6QH25|F6QH25_MOUSE	tr|E9Q4G8|E9Q4G8_MOUSE CD166 antigen OS=Mus musculus GN=Alcam PE=1 SV=1;tr|E9Q3Q6|E9Q3Q6_MOUSE CD166 antigen OS=Mus musculus GN=Alcam PE=1 SV=1;tr|Q54AJ5|Q54AJ5_MOUSE MuSC OS=Mus musculus GN=Alcam PE=1 SV=1;sp|Q61490|CD166_MOUSE CD166 antigen OS=Mus muscul						15373000
tr|E9Q529|E9Q529_MOUSE;sp|Q1EHW4|SAP25_MOUSE;tr|H3BLC5|H3BLC5_MOUSE	tr|E9Q529|E9Q529_MOUSE;sp|Q1EHW4|SAP25_MOUSE;tr|H3BLC5|H3BLC5_MOUSE	tr|E9Q529|E9Q529_MOUSE Histone deacetylase complex subunit SAP25 OS=Mus musculus GN=Sap25 PE=1 SV=1;sp|Q1EHW4|SAP25_MOUSE Histone deacetylase complex subunit SAP25 OS=Mus musculus GN=Sap25 PE=1 SV=1;tr|H3BLC5|H3BLC5_MOUSE Histone deacetylase complex subuni			181930000
tr|E9Q5L2|E9Q5L2_MOUSE;tr|E9PVD2|E9PVD2_MOUSE;sp|A6X935|ITIH4_MOUSE;tr|A0A0R4J1N1|A0A0R4J1N1_MOUSE;CON__Q3T052	tr|E9Q5L2|E9Q5L2_MOUSE;tr|E9PVD2|E9PVD2_MOUSE;sp|A6X935|ITIH4_MOUSE;tr|A0A0R4J1N1|A0A0R4J1N1_MOUSE	tr|E9Q5L2|E9Q5L2_MOUSE Inter alpha-trypsin inhibitor, heavy chain 4 OS=Mus musculus GN=Itih4 PE=1 SV=1;tr|E9PVD2|E9PVD2_MOUSE Inter alpha-trypsin inhibitor, heavy chain 4 OS=Mus musculus GN=Itih4 PE=1 SV=1;sp|A6X935|ITIH4_MOUSE Inter alpha-trypsin inhibito	146715000	115420000	116140000	45377000	720660000	182590000	290920000	303720000	99459000	47891000	143390000	133720000
tr|E9Q5N7|E9Q5N7_MOUSE;tr|B2RX09|B2RX09_MOUSE;tr|Q6ZQ25|Q6ZQ25_MOUSE;tr|E9PUN0|E9PUN0_MOUSE;tr|Q3UGZ9|Q3UGZ9_MOUSE;tr|E9PUM9|E9PUM9_MOUSE;tr|E9Q7X7|E9Q7X7_MOUSE;tr|Q3TQ54|Q3TQ54_MOUSE;tr|E9PUN1|E9PUN1_MOUSE;tr|E9PUN2|E9PUN2_MOUSE	tr|E9Q5N7|E9Q5N7_MOUSE;tr|B2RX09|B2RX09_MOUSE;tr|Q6ZQ25|Q6ZQ25_MOUSE;tr|E9PUN0|E9PUN0_MOUSE;tr|Q3UGZ9|Q3UGZ9_MOUSE;tr|E9PUM9|E9PUM9_MOUSE;tr|E9Q7X7|E9Q7X7_MOUSE	tr|E9Q5N7|E9Q5N7_MOUSE Neurexin II OS=Mus musculus GN=Nrxn2 PE=1 SV=2;tr|B2RX09|B2RX09_MOUSE Nrxn2 protein OS=Mus musculus GN=Nrxn2 PE=2 SV=1;tr|Q6ZQ25|Q6ZQ25_MOUSE MKIAA0921 protein (Fragment) OS=Mus musculus GN=mKIAA0921 PE=4 SV=1;tr|E9PUN0|E9PUN0_MOUSE		31588000	29874000	34300000		25035000			31329000
tr|E9Q616|E9Q616_MOUSE;tr|Q6UL10|Q6UL10_MOUSE;tr|Q61484|Q61484_MOUSE;tr|A0PJF4|A0PJF4_MOUSE;tr|A0JLR7|A0JLR7_MOUSE;tr|Q8BRB8|Q8BRB8_MOUSE;tr|Q8BKS2|Q8BKS2_MOUSE;tr|Q3UYW8|Q3UYW8_MOUSE;tr|Q8VDN3|Q8VDN3_MOUSE;tr|G5E8K8|G5E8K8_MOUSE;tr|Q8R2L7|Q8R2L7_MOUSE;tr|Q8CEX7|Q8CEX7_MOUSE	tr|E9Q616|E9Q616_MOUSE;tr|Q6UL10|Q6UL10_MOUSE	tr|E9Q616|E9Q616_MOUSE AHNAK nucleoprotein (desmoyokin) OS=Mus musculus GN=Ahnak PE=1 SV=1;tr|Q6UL10|Q6UL10_MOUSE AHNAK (Fragment) OS=Mus musculus GN=Ahnak PE=3 SV=1	117485000				368270000	245570000	303160000					45511000
tr|E9Q798|E9Q798_MOUSE;tr|Q14BR4|Q14BR4_MOUSE;sp|P61750|ARF4_MOUSE;tr|F6UFB9|F6UFB9_MOUSE	tr|E9Q798|E9Q798_MOUSE;tr|Q14BR4|Q14BR4_MOUSE;sp|P61750|ARF4_MOUSE;tr|F6UFB9|F6UFB9_MOUSE	tr|E9Q798|E9Q798_MOUSE ADP-ribosylation factor 4 OS=Mus musculus GN=Arf4 PE=1 SV=1;tr|Q14BR4|Q14BR4_MOUSE ADP-ribosylation factor 4 OS=Mus musculus GN=Arf4 PE=1 SV=1;sp|P61750|ARF4_MOUSE ADP-ribosylation factor 4 OS=Mus musculus GN=Arf4 PE=1 SV=2;tr|F6UFB9
tr|E9Q8N1|E9Q8N1_MOUSE;tr|E9Q8K5|E9Q8K5_MOUSE;sp|A2ASS6|TITIN_MOUSE;tr|F7CR78|F7CR78_MOUSE;tr|Q9CTL3|Q9CTL3_MOUSE;tr|Q8R112|Q8R112_MOUSE;tr|Q8C139|Q8C139_MOUSE;tr|Q812E1|Q812E1_MOUSE;tr|F6RSJ3|F6RSJ3_MOUSE;tr|Q8BUC9|Q8BUC9_MOUSE;tr|Q8BUJ6|Q8BUJ6_MOUSE;tr|Q8BIH3|Q8BIH3_MOUSE;tr|A2AT68|A2AT68_MOUSE;tr|Q8BUJ0|Q8BUJ0_MOUSE	tr|E9Q8N1|E9Q8N1_MOUSE;tr|E9Q8K5|E9Q8K5_MOUSE;sp|A2ASS6|TITIN_MOUSE	tr|E9Q8N1|E9Q8N1_MOUSE Titin OS=Mus musculus GN=Ttn PE=1 SV=1;tr|E9Q8K5|E9Q8K5_MOUSE Titin OS=Mus musculus GN=Ttn PE=1 SV=1;sp|A2ASS6|TITIN_MOUSE Titin OS=Mus musculus GN=Ttn PE=1 SV=1											94610000
tr|E9QB01|E9QB01_MOUSE;tr|O88682|O88682_MOUSE	tr|E9QB01|E9QB01_MOUSE	tr|E9QB01|E9QB01_MOUSE Neural cell adhesion molecule 1 OS=Mus musculus GN=Ncam1 PE=1 SV=2				38970000
tr|E9QN08|E9QN08_MOUSE;tr|Q80T06|Q80T06_MOUSE;sp|P57776|EF1D_MOUSE;tr|A0A0R4J1E2|A0A0R4J1E2_MOUSE;tr|D3YUQ9|D3YUQ9_MOUSE;tr|A0A0R4J1L2|A0A0R4J1L2_MOUSE;tr|Q91VK2|Q91VK2_MOUSE;tr|F6ZFU0|F6ZFU0_MOUSE;tr|D3Z7N2|D3Z7N2_MOUSE;tr|D3YZT9|D3YZT9_MOUSE;tr|D3YY68|D3YY68_MOUSE	tr|E9QN08|E9QN08_MOUSE;tr|Q80T06|Q80T06_MOUSE;sp|P57776|EF1D_MOUSE;tr|A0A0R4J1E2|A0A0R4J1E2_MOUSE;tr|D3YUQ9|D3YUQ9_MOUSE;tr|A0A0R4J1L2|A0A0R4J1L2_MOUSE;tr|Q91VK2|Q91VK2_MOUSE;tr|F6ZFU0|F6ZFU0_MOUSE;tr|D3Z7N2|D3Z7N2_MOUSE;tr|D3YZT9|D3YZT9_MOUSE	tr|E9QN08|E9QN08_MOUSE Elongation factor 1-delta (Fragment) OS=Mus musculus GN=Eef1d PE=1 SV=1;tr|Q80T06|Q80T06_MOUSE Elongation factor 1-delta OS=Mus musculus GN=Eef1d PE=1 SV=1;sp|P57776|EF1D_MOUSE Elongation factor 1-delta OS=Mus musculus GN=Eef1d PE=1					26535000	32787000	29377000				25786000
tr|E9QN99|E9QN99_MOUSE;sp|Q8VCR7|ABHEB_MOUSE;tr|A0A087WPF8|A0A087WPF8_MOUSE;tr|A0A087WSR2|A0A087WSR2_MOUSE;tr|A0A1L1SUX1|A0A1L1SUX1_MOUSE;tr|A0A087WRJ2|A0A087WRJ2_MOUSE;tr|A0A1L1SRH5|A0A1L1SRH5_MOUSE;tr|A0A087WP24|A0A087WP24_MOUSE	tr|E9QN99|E9QN99_MOUSE;sp|Q8VCR7|ABHEB_MOUSE;tr|A0A087WPF8|A0A087WPF8_MOUSE;tr|A0A087WSR2|A0A087WSR2_MOUSE;tr|A0A1L1SUX1|A0A1L1SUX1_MOUSE;tr|A0A087WRJ2|A0A087WRJ2_MOUSE	tr|E9QN99|E9QN99_MOUSE Protein ABHD14B OS=Mus musculus GN=Abhd14b PE=1 SV=1;sp|Q8VCR7|ABHEB_MOUSE Protein ABHD14B OS=Mus musculus GN=Abhd14b PE=1 SV=1;tr|A0A087WPF8|A0A087WPF8_MOUSE Protein ABHD14B (Fragment) OS=Mus musculus GN=Abhd14b PE=1 SV=1;tr|A0A087W												8426000
tr|E9QNT8|E9QNT8_MOUSE;sp|Q02357|ANK1_MOUSE;tr|G8JL84|G8JL84_MOUSE;tr|D3Z5M4|D3Z5M4_MOUSE;tr|Q0VGY9|Q0VGY9_MOUSE;tr|A0A0R4J1N7|A0A0R4J1N7_MOUSE;tr|D3YTV8|D3YTV8_MOUSE;tr|G5E8J2|G5E8J2_MOUSE;tr|B7ZW98|B7ZW98_MOUSE;tr|F7D1P5|F7D1P5_MOUSE;tr|Q61304|Q61304_MOUSE;tr|G3UY11|G3UY11_MOUSE;tr|D6RJ51|D6RJ51_MOUSE	tr|E9QNT8|E9QNT8_MOUSE;sp|Q02357|ANK1_MOUSE;tr|G8JL84|G8JL84_MOUSE;tr|D3Z5M4|D3Z5M4_MOUSE;tr|Q0VGY9|Q0VGY9_MOUSE;tr|A0A0R4J1N7|A0A0R4J1N7_MOUSE;tr|D3YTV8|D3YTV8_MOUSE;tr|G5E8J2|G5E8J2_MOUSE;tr|B7ZW98|B7ZW98_MOUSE;tr|F7D1P5|F7D1P5_MOUSE;tr|Q61304|Q61304_MOUSE;tr|G3UY11|G3UY11_MOUSE	tr|E9QNT8|E9QNT8_MOUSE Ankyrin-1 OS=Mus musculus GN=Ank1 PE=1 SV=1;sp|Q02357|ANK1_MOUSE Ankyrin-1 OS=Mus musculus GN=Ank1 PE=1 SV=2;tr|G8JL84|G8JL84_MOUSE Ankyrin-1 OS=Mus musculus GN=Ank1 PE=1 SV=1;tr|D3Z5M4|D3Z5M4_MOUSE Ankyrin-1 OS=Mus musculus GN=Ank1	192080000					36875000		47405000		740690000	119000000	352650000
tr|F6QYZ5|F6QYZ5_MOUSE;tr|D3Z6T6|D3Z6T6_MOUSE;sp|Q9ET66|PI16_MOUSE;tr|E9QNE5|E9QNE5_MOUSE	tr|F6QYZ5|F6QYZ5_MOUSE;tr|D3Z6T6|D3Z6T6_MOUSE;sp|Q9ET66|PI16_MOUSE;tr|E9QNE5|E9QNE5_MOUSE	tr|F6QYZ5|F6QYZ5_MOUSE Peptidase inhibitor 16 (Fragment) OS=Mus musculus GN=Pi16 PE=1 SV=1;tr|D3Z6T6|D3Z6T6_MOUSE Peptidase inhibitor 16 OS=Mus musculus GN=Pi16 PE=1 SV=1;sp|Q9ET66|PI16_MOUSE Peptidase inhibitor 16 OS=Mus musculus GN=Pi16 PE=1 SV=1;tr|E9QN	37391000	45034000		46618000	54806000	38697000	50383000	38750000	47291000	35461000	30720000
tr|F6RT34|F6RT34_MOUSE;tr|F6VME3|F6VME3_MOUSE;tr|F7A0B0|F7A0B0_MOUSE;tr|Q09J72|Q09J72_MOUSE;tr|Q542T4|Q542T4_MOUSE;tr|F6ZIA4|F6ZIA4_MOUSE;tr|F6TYB7|F6TYB7_MOUSE;tr|Q3UGF3|Q3UGF3_MOUSE;tr|F6RWW8|F6RWW8_MOUSE;sp|P04370|MBP_MOUSE;tr|Q5D096|Q5D096_MOUSE	tr|F6RT34|F6RT34_MOUSE;tr|F6VME3|F6VME3_MOUSE;tr|F7A0B0|F7A0B0_MOUSE;tr|Q09J72|Q09J72_MOUSE;tr|Q542T4|Q542T4_MOUSE;tr|F6ZIA4|F6ZIA4_MOUSE;tr|F6TYB7|F6TYB7_MOUSE;tr|Q3UGF3|Q3UGF3_MOUSE;tr|F6RWW8|F6RWW8_MOUSE;sp|P04370|MBP_MOUSE	tr|F6RT34|F6RT34_MOUSE Myelin basic protein (Fragment) OS=Mus musculus GN=Mbp PE=1 SV=1;tr|F6VME3|F6VME3_MOUSE Myelin basic protein (Fragment) OS=Mus musculus GN=Mbp PE=1 SV=1;tr|F7A0B0|F7A0B0_MOUSE Myelin basic protein (Fragment) OS=Mus musculus GN=Mbp PE						30437000					2700800000	95940000
tr|F6UFG6|F6UFG6_MOUSE;tr|D3YYE1|D3YYE1_MOUSE;tr|D3Z7M9|D3Z7M9_MOUSE;sp|O35381|AN32A_MOUSE;sp|Q64G17|AN32C_MOUSE	tr|F6UFG6|F6UFG6_MOUSE;tr|D3YYE1|D3YYE1_MOUSE;tr|D3Z7M9|D3Z7M9_MOUSE;sp|O35381|AN32A_MOUSE;sp|Q64G17|AN32C_MOUSE	tr|F6UFG6|F6UFG6_MOUSE Acidic leucine-rich nuclear phosphoprotein 32 family member A (Fragment) OS=Mus musculus GN=Anp32a PE=1 SV=1;tr|D3YYE1|D3YYE1_MOUSE Acidic leucine-rich nuclear phosphoprotein 32 family member A (Fragment) OS=Mus musculus GN=Anp32a PE					13139000
tr|F6USD5|F6USD5_MOUSE;tr|F6T4L3|F6T4L3_MOUSE;tr|Q80ZP8|Q80ZP8_MOUSE;tr|A8C1V1|A8C1V1_MOUSE;tr|Q3TMX5|Q3TMX5_MOUSE;sp|Q9CXI5|MANF_MOUSE	tr|F6USD5|F6USD5_MOUSE;tr|F6T4L3|F6T4L3_MOUSE;tr|Q80ZP8|Q80ZP8_MOUSE;tr|A8C1V1|A8C1V1_MOUSE;tr|Q3TMX5|Q3TMX5_MOUSE;sp|Q9CXI5|MANF_MOUSE	tr|F6USD5|F6USD5_MOUSE Mesencephalic astrocyte-derived neurotrophic factor (Fragment) OS=Mus musculus GN=Manf PE=1 SV=1;tr|F6T4L3|F6T4L3_MOUSE Mesencephalic astrocyte-derived neurotrophic factor (Fragment) OS=Mus musculus GN=Manf PE=1 SV=1;tr|Q80ZP8|Q80ZP8						9386600
tr|F6V9F1|F6V9F1_MOUSE;tr|Q8BPI6|Q8BPI6_MOUSE;tr|Q545L9|Q545L9_MOUSE;sp|P23506|PIMT_MOUSE;tr|F7D432|F7D432_MOUSE;tr|E9PWE0|E9PWE0_MOUSE;tr|E0CYV0|E0CYV0_MOUSE	tr|F6V9F1|F6V9F1_MOUSE;tr|Q8BPI6|Q8BPI6_MOUSE;tr|Q545L9|Q545L9_MOUSE;sp|P23506|PIMT_MOUSE;tr|F7D432|F7D432_MOUSE;tr|E9PWE0|E9PWE0_MOUSE;tr|E0CYV0|E0CYV0_MOUSE	tr|F6V9F1|F6V9F1_MOUSE Protein-L-isoaspartate(D-aspartate) O-methyltransferase (Fragment) OS=Mus musculus GN=Pcmt1 PE=1 SV=1;tr|Q8BPI6|Q8BPI6_MOUSE Protein-L-isoaspartate O-methyltransferase (Fragment) OS=Mus musculus GN=Pcmt1 PE=2 SV=1;tr|Q545L9|Q545L9_MO							10455000
tr|F7CVJ5|F7CVJ5_MOUSE;tr|F7DBB3|F7DBB3_MOUSE;tr|E9PYB0|E9PYB0_MOUSE	tr|F7CVJ5|F7CVJ5_MOUSE;tr|F7DBB3|F7DBB3_MOUSE;tr|E9PYB0|E9PYB0_MOUSE	tr|F7CVJ5|F7CVJ5_MOUSE AHNAK nucleoprotein 2 (Fragment) OS=Mus musculus GN=Ahnak2 PE=1 SV=1;tr|F7DBB3|F7DBB3_MOUSE AHNAK nucleoprotein 2 (Fragment) OS=Mus musculus GN=Ahnak2 PE=1 SV=1;tr|E9PYB0|E9PYB0_MOUSE AHNAK nucleoprotein 2 (Fragment) OS=Mus musculus					18766000		16462000
tr|F8WJK8|F8WJK8_MOUSE;tr|Q3U9V1|Q3U9V1_MOUSE;tr|Q3U8D2|Q3U8D2_MOUSE;tr|Q3U3N7|Q3U3N7_MOUSE;sp|Q99L47|F10A1_MOUSE;tr|E9Q1V0|E9Q1V0_MOUSE;tr|Q3TGW8|Q3TGW8_MOUSE;tr|E9Q1X9|E9Q1X9_MOUSE	tr|F8WJK8|F8WJK8_MOUSE;tr|Q3U9V1|Q3U9V1_MOUSE;tr|Q3U8D2|Q3U8D2_MOUSE;tr|Q3U3N7|Q3U3N7_MOUSE;sp|Q99L47|F10A1_MOUSE;tr|E9Q1V0|E9Q1V0_MOUSE;tr|Q3TGW8|Q3TGW8_MOUSE	tr|F8WJK8|F8WJK8_MOUSE Hsc70-interacting protein OS=Mus musculus GN=St13 PE=1 SV=1;tr|Q3U9V1|Q3U9V1_MOUSE Uncharacterized protein OS=Mus musculus GN=St13 PE=2 SV=1;tr|Q3U8D2|Q3U8D2_MOUSE Uncharacterized protein OS=Mus musculus GN=St13 PE=2 SV=1;tr|Q3U3N7|Q						32053000
tr|F8VPK6|F8VPK6_MOUSE;sp|Q811B1|XYLT1_MOUSE	tr|F8VPK6|F8VPK6_MOUSE;sp|Q811B1|XYLT1_MOUSE	tr|F8VPK6|F8VPK6_MOUSE Xylosyltransferase 1 OS=Mus musculus GN=Xylt1 PE=1 SV=1;sp|Q811B1|XYLT1_MOUSE Xylosyltransferase 1 OS=Mus musculus GN=Xylt1 PE=2 SV=1							3971500
tr|F8VPN4|F8VPN4_MOUSE;tr|A0A0G2JGI9|A0A0G2JGI9_MOUSE;tr|F6XXE6|F6XXE6_MOUSE;tr|E0CYU6|E0CYU6_MOUSE;tr|F7CSZ6|F7CSZ6_MOUSE;tr|E0CX86|E0CX86_MOUSE;tr|Q8CE68|Q8CE68_MOUSE	tr|F8VPN4|F8VPN4_MOUSE;tr|A0A0G2JGI9|A0A0G2JGI9_MOUSE	tr|F8VPN4|F8VPN4_MOUSE Amylo-1,6-glucosidase, 4-alpha-glucanotransferase OS=Mus musculus GN=Agl PE=1 SV=1;tr|A0A0G2JGI9|A0A0G2JGI9_MOUSE Amylo-1,6-glucosidase, 4-alpha-glucanotransferase OS=Mus musculus GN=Agl PE=1 SV=1	32351500	16981000			18117000	46161000					123490000
tr|F8VQ65|F8VQ65_MOUSE;sp|O08632|KR195_MOUSE	tr|F8VQ65|F8VQ65_MOUSE;sp|O08632|KR195_MOUSE	tr|F8VQ65|F8VQ65_MOUSE Keratin-associated protein 19-5 OS=Mus musculus GN=Krtap19-5 PE=1 SV=1;sp|O08632|KR195_MOUSE Keratin-associated protein 19-5 OS=Mus musculus GN=Krtap19-5 PE=2 SV=1					89551000
tr|F8VQD7|F8VQD7_MOUSE;sp|Q05909|PTPRG_MOUSE	tr|F8VQD7|F8VQD7_MOUSE;sp|Q05909|PTPRG_MOUSE	tr|F8VQD7|F8VQD7_MOUSE Receptor-type tyrosine-protein phosphatase gamma OS=Mus musculus GN=Ptprg PE=1 SV=1;sp|Q05909|PTPRG_MOUSE Receptor-type tyrosine-protein phosphatase gamma OS=Mus musculus GN=Ptprg PE=1 SV=1									11335000
tr|F8VQJ3|F8VQJ3_MOUSE;sp|P02468|LAMC1_MOUSE;tr|Q3URV4|Q3URV4_MOUSE;tr|Q3UFZ9|Q3UFZ9_MOUSE;tr|Q3TRH4|Q3TRH4_MOUSE;tr|F6TLW1|F6TLW1_MOUSE;tr|Q6PHM1|Q6PHM1_MOUSE;tr|Q3UNG0|Q3UNG0_MOUSE	tr|F8VQJ3|F8VQJ3_MOUSE;sp|P02468|LAMC1_MOUSE;tr|Q3URV4|Q3URV4_MOUSE;tr|Q3UFZ9|Q3UFZ9_MOUSE;tr|Q3TRH4|Q3TRH4_MOUSE	tr|F8VQJ3|F8VQJ3_MOUSE Laminin subunit gamma-1 OS=Mus musculus GN=Lamc1 PE=1 SV=1;sp|P02468|LAMC1_MOUSE Laminin subunit gamma-1 OS=Mus musculus GN=Lamc1 PE=1 SV=2;tr|Q3URV4|Q3URV4_MOUSE Uncharacterized protein (Fragment) OS=Mus musculus GN=Lamc1 PE=2 SV=1;				33008000
tr|G0YP42|G0YP42_MOUSE;tr|A4FU62|A4FU62_MOUSE;sp|P01843|LAC1_MOUSE;tr|A0A0G2JE99|A0A0G2JE99_MOUSE;tr|Q9D8W4|Q9D8W4_MOUSE;tr|A2NVW1|A2NVW1_MOUSE;tr|A0A075B663|A0A075B663_MOUSE;sp|P01723|LV1A_MOUSE;sp|P01727|LV1E_MOUSE;tr|A2MXS5|A2MXS5_MOUSE;tr|A2NVW5|A2NVW5_MOUSE;tr|A2NVW4|A2NVW4_MOUSE;tr|A2NVW3|A2NVW3_MOUSE;tr|A2NVW2|A2NVW2_MOUSE;tr|Q9ET13|Q9ET13_MOUSE;tr|A2MY58|A2MY58_MOUSE;tr|Q8CGS1|Q8CGS1_MOUS…	tr|G0YP42|G0YP42_MOUSE;tr|A4FU62|A4FU62_MOUSE;sp|P01843|LAC1_MOUSE;tr|A0A0G2JE99|A0A0G2JE99_MOUSE;tr|Q9D8W4|Q9D8W4_MOUSE	tr|G0YP42|G0YP42_MOUSE Anti-human Langerin 2G3 lambda chain OS=Mus musculus PE=1 SV=1;tr|A4FU62|A4FU62_MOUSE LOC207685 protein (Fragment) OS=Mus musculus GN=LOC207685 PE=2 SV=1;sp|P01843|LAC1_MOUSE Ig lambda-1 chain C region OS=Mus musculus PE=1 SV=1;tr|A0	128290000						41238000	78123000		139950000	55394000	30078000
tr|G3UW82|G3UW82_MOUSE;tr|I6L963|I6L963_MOUSE	tr|G3UW82|G3UW82_MOUSE;tr|I6L963|I6L963_MOUSE	tr|G3UW82|G3UW82_MOUSE MCG140437, isoform CRA_d OS=Mus musculus GN=Myh2 PE=1 SV=1;tr|I6L963|I6L963_MOUSE Myh2 protein OS=Mus musculus GN=Myh2 PE=2 SV=1	72790500				52872000	51423000	58959000				27053000
tr|G3UX26|G3UX26_MOUSE;sp|Q60930|VDAC2_MOUSE;tr|D3YUN8|D3YUN8_MOUSE;tr|D3YZT5|D3YZT5_MOUSE;tr|A0A286YCR8|A0A286YCR8_MOUSE	tr|G3UX26|G3UX26_MOUSE;sp|Q60930|VDAC2_MOUSE;tr|D3YUN8|D3YUN8_MOUSE;tr|D3YZT5|D3YZT5_MOUSE;tr|A0A286YCR8|A0A286YCR8_MOUSE	tr|G3UX26|G3UX26_MOUSE Voltage-dependent anion-selective channel protein 2 OS=Mus musculus GN=Vdac2 PE=1 SV=1;sp|Q60930|VDAC2_MOUSE Voltage-dependent anion-selective channel protein 2 OS=Mus musculus GN=Vdac2 PE=1 SV=2;tr|D3YUN8|D3YUN8_MOUSE Voltage-depend						11301000
tr|G3UXX3|G3UXX3_MOUSE;sp|Q64105|SPRE_MOUSE;tr|Q91XH5|Q91XH5_MOUSE;tr|G3UZ79|G3UZ79_MOUSE	tr|G3UXX3|G3UXX3_MOUSE;sp|Q64105|SPRE_MOUSE;tr|Q91XH5|Q91XH5_MOUSE;tr|G3UZ79|G3UZ79_MOUSE	tr|G3UXX3|G3UXX3_MOUSE Sepiapterin reductase OS=Mus musculus GN=Spr PE=1 SV=1;sp|Q64105|SPRE_MOUSE Sepiapterin reductase OS=Mus musculus GN=Spr PE=1 SV=1;tr|Q91XH5|Q91XH5_MOUSE Sepiapterin reductase OS=Mus musculus GN=Spr PE=1 SV=1;tr|G3UZ79|G3UZ79_MOUSE S							47504000
tr|G3UXY0|G3UXY0_MOUSE;tr|G3UXZ5|G3UXZ5_MOUSE;tr|Q5HZK3|Q5HZK3_MOUSE;sp|P97371|PSME1_MOUSE;tr|G3UXR1|G3UXR1_MOUSE;tr|G3UWN9|G3UWN9_MOUSE;tr|G3X9K9|G3X9K9_MOUSE	tr|G3UXY0|G3UXY0_MOUSE;tr|G3UXZ5|G3UXZ5_MOUSE;tr|Q5HZK3|Q5HZK3_MOUSE;sp|P97371|PSME1_MOUSE;tr|G3UXR1|G3UXR1_MOUSE;tr|G3UWN9|G3UWN9_MOUSE;tr|G3X9K9|G3X9K9_MOUSE	tr|G3UXY0|G3UXY0_MOUSE Proteasome activator complex subunit 1 OS=Mus musculus GN=Psme1 PE=1 SV=1;tr|G3UXZ5|G3UXZ5_MOUSE Proteasome activator complex subunit 1 (Fragment) OS=Mus musculus GN=Psme1 PE=1 SV=1;tr|Q5HZK3|Q5HZK3_MOUSE Proteasome (Prosome, macropa	12380500
tr|G3UY29|G3UY29_MOUSE;tr|E9Q3P9|E9Q3P9_MOUSE;tr|F8WGS1|F8WGS1_MOUSE;tr|Q3UZ37|Q3UZ37_MOUSE;tr|G3UZD3|G3UZD3_MOUSE;tr|Q0PD45|Q0PD45_MOUSE;sp|P62492|RB11A_MOUSE;tr|Q78ZJ8|Q78ZJ8_MOUSE;tr|A0A068BFR3|A0A068BFR3_MOUSE;sp|P46638|RB11B_MOUSE;tr|Q9QWU0|Q9QWU0_MOUSE;tr|E9Q6B3|E9Q6B3_MOUSE;tr|G3UZL4|G3UZL4_MOUSE	tr|G3UY29|G3UY29_MOUSE;tr|E9Q3P9|E9Q3P9_MOUSE;tr|F8WGS1|F8WGS1_MOUSE;tr|Q3UZ37|Q3UZ37_MOUSE;tr|G3UZD3|G3UZD3_MOUSE;tr|Q0PD45|Q0PD45_MOUSE;sp|P62492|RB11A_MOUSE;tr|Q78ZJ8|Q78ZJ8_MOUSE;tr|A0A068BFR3|A0A068BFR3_MOUSE;sp|P46638|RB11B_MOUSE;tr|Q9QWU0|Q9QWU0_MOUSE;tr|E9Q6B3|E9Q6B3_MOUSE;tr|G3UZL4|G3UZL4_MOUSE	tr|G3UY29|G3UY29_MOUSE MCG22989, isoform CRA_a OS=Mus musculus GN=Rab11b PE=4 SV=1;tr|E9Q3P9|E9Q3P9_MOUSE Ras-related protein Rab-11A OS=Mus musculus GN=Rab11a PE=4 SV=1;tr|F8WGS1|F8WGS1_MOUSE Ras-related protein Rab-11A (Fragment) OS=Mus musculus GN=Rab11						21233000
tr|G3UZM4|G3UZM4_MOUSE;sp|Q8BLQ9|CADM2_MOUSE;tr|B4DJ19|B4DJ19_HUMAN	tr|G3UZM4|G3UZM4_MOUSE;sp|Q8BLQ9|CADM2_MOUSE;tr|B4DJ19|B4DJ19_HUMAN	tr|G3UZM4|G3UZM4_MOUSE Cell adhesion molecule 2 (Fragment) OS=Mus musculus GN=Cadm2 PE=1 SV=1;sp|Q8BLQ9|CADM2_MOUSE Cell adhesion molecule 2 OS=Mus musculus GN=Cadm2 PE=1 SV=2;tr|B4DJ19|B4DJ19_HUMAN cDNA FLJ61287, highly similar to Mus musculus cell adhesi						4910300
tr|G3X8T9|G3X8T9_MOUSE	tr|G3X8T9|G3X8T9_MOUSE	tr|G3X8T9|G3X8T9_MOUSE Serine (Or cysteine) peptidase inhibitor, clade A, member 3N, isoform CRA_a OS=Mus musculus GN=Serpina3n PE=1 SV=1	163605000	203590000	230810000	213620000	193060000	203350000	176140000	163860000	351640000	310040000	273490000	324000000
tr|G3X9I1|G3X9I1_MOUSE;sp|Q91VU0|FAM3C_MOUSE;tr|G5E911|G5E911_MOUSE;tr|Q6NSU0|Q6NSU0_MOUSE;tr|E9Q8C5|E9Q8C5_MOUSE;tr|E9Q6F0|E9Q6F0_MOUSE	tr|G3X9I1|G3X9I1_MOUSE;sp|Q91VU0|FAM3C_MOUSE;tr|G5E911|G5E911_MOUSE;tr|Q6NSU0|Q6NSU0_MOUSE	tr|G3X9I1|G3X9I1_MOUSE DNA segment, Chr 6, Wayne State University 176, expressed, isoform CRA_a OS=Mus musculus GN=Fam3c PE=1 SV=1;sp|Q91VU0|FAM3C_MOUSE Protein FAM3C OS=Mus musculus GN=Fam3c PE=1 SV=1;tr|G5E911|G5E911_MOUSE DNA segment, Chr 6, Wayne State	82909000	89123000	106750000	114410000	64220000	75642000	74305000	69129000	73990000	76341000	57150000	85816000
tr|G3X9L6|G3X9L6_MOUSE;sp|Q9DCX2|ATP5H_MOUSE;tr|B1ASE2|B1ASE2_MOUSE	tr|G3X9L6|G3X9L6_MOUSE;sp|Q9DCX2|ATP5H_MOUSE;tr|B1ASE2|B1ASE2_MOUSE	tr|G3X9L6|G3X9L6_MOUSE ATP synthase subunit d, mitochondrial OS=Mus musculus GN=Gm10250 PE=3 SV=1;sp|Q9DCX2|ATP5H_MOUSE ATP synthase subunit d, mitochondrial OS=Mus musculus GN=Atp5h PE=1 SV=3;tr|B1ASE2|B1ASE2_MOUSE ATP synthase subunit d, mitochondrial (F					58144000	75418000	49223000
tr|G5E850|G5E850_MOUSE;tr|Q544Z9|Q544Z9_MOUSE;sp|P56395|CYB5_MOUSE;tr|E0CY88|E0CY88_MOUSE	tr|G5E850|G5E850_MOUSE;tr|Q544Z9|Q544Z9_MOUSE;sp|P56395|CYB5_MOUSE	tr|G5E850|G5E850_MOUSE Cytochrome b-5, isoform CRA_a OS=Mus musculus GN=Cyb5a PE=1 SV=1;tr|Q544Z9|Q544Z9_MOUSE Cytochrome b-5, isoform CRA_d OS=Mus musculus GN=Cyb5a PE=1 SV=1;sp|P56395|CYB5_MOUSE Cytochrome b5 OS=Mus musculus GN=Cyb5a PE=1 SV=2	104799000									87427000
tr|G5E8G0|G5E8G0_MOUSE;tr|G3X9W0|G3X9W0_MOUSE;tr|E9Q5B6|E9Q5B6_MOUSE;tr|F6ZV59|F6ZV59_MOUSE;tr|F6SHF3|F6SHF3_MOUSE;sp|Q9Z130|HNRDL_MOUSE;tr|F6VQH5|F6VQH5_MOUSE;tr|D3YTQ3|D3YTQ3_MOUSE;tr|Q9D3U4|Q9D3U4_MOUSE	tr|G5E8G0|G5E8G0_MOUSE;tr|G3X9W0|G3X9W0_MOUSE;tr|E9Q5B6|E9Q5B6_MOUSE;tr|F6ZV59|F6ZV59_MOUSE	tr|G5E8G0|G5E8G0_MOUSE Heterogeneous nuclear ribonucleoprotein D, isoform CRA_b OS=Mus musculus GN=Hnrnpd PE=1 SV=1;tr|G3X9W0|G3X9W0_MOUSE Heterogeneous nuclear ribonucleoprotein D, isoform CRA_a OS=Mus musculus GN=Hnrnpd PE=1 SV=1;tr|E9Q5B6|E9Q5B6_MOUSE H	32388000						37522000				32244000
tr|H3BIX4|H3BIX4_MOUSE;tr|Z4YLB7|Z4YLB7_MOUSE;sp|P97300|NPTN_MOUSE;tr|H3BKA7|H3BKA7_MOUSE;tr|A0A0A0MQN8|A0A0A0MQN8_MOUSE	tr|H3BIX4|H3BIX4_MOUSE;tr|Z4YLB7|Z4YLB7_MOUSE;sp|P97300|NPTN_MOUSE;tr|H3BKA7|H3BKA7_MOUSE	tr|H3BIX4|H3BIX4_MOUSE Neuroplastin (Fragment) OS=Mus musculus GN=Nptn PE=1 SV=1;tr|Z4YLB7|Z4YLB7_MOUSE Neuroplastin OS=Mus musculus GN=Nptn PE=1 SV=1;sp|P97300|NPTN_MOUSE Neuroplastin OS=Mus musculus GN=Nptn PE=1 SV=3;tr|H3BKA7|H3BKA7_MOUSE Neuroplastin O												46591000
tr|H3BKM0|H3BKM0_MOUSE;sp|Q9DBG3|AP2B1_MOUSE;tr|H3BIY9|H3BIY9_MOUSE;tr|Q5SWR1|Q5SWR1_MOUSE;tr|Q5SVG5|Q5SVG5_MOUSE;tr|Q5SVG4|Q5SVG4_MOUSE;tr|Q3U1K9|Q3U1K9_MOUSE;tr|Q3TVN4|Q3TVN4_MOUSE;sp|O35643|AP1B1_MOUSE;tr|Q8CC13|Q8CC13_MOUSE	tr|H3BKM0|H3BKM0_MOUSE;sp|Q9DBG3|AP2B1_MOUSE;tr|H3BIY9|H3BIY9_MOUSE;tr|Q5SWR1|Q5SWR1_MOUSE;tr|Q5SVG5|Q5SVG5_MOUSE;tr|Q5SVG4|Q5SVG4_MOUSE;tr|Q3U1K9|Q3U1K9_MOUSE;tr|Q3TVN4|Q3TVN4_MOUSE;sp|O35643|AP1B1_MOUSE;tr|Q8CC13|Q8CC13_MOUSE	tr|H3BKM0|H3BKM0_MOUSE AP complex subunit beta OS=Mus musculus GN=Ap2b1 PE=1 SV=1;sp|Q9DBG3|AP2B1_MOUSE AP-2 complex subunit beta OS=Mus musculus GN=Ap2b1 PE=1 SV=1;tr|H3BIY9|H3BIY9_MOUSE AP complex subunit beta OS=Mus musculus GN=Ap2b1 PE=1 SV=1;tr|Q5SWR1
tr|H3BLF7|H3BLF7_MOUSE;tr|H3BKR2|H3BKR2_MOUSE;tr|Q3U1B1|Q3U1B1_MOUSE;tr|Q3TQ70|Q3TQ70_MOUSE;sp|P62874|GBB1_MOUSE;tr|Q61621|Q61621_MOUSE;tr|Q8BMQ1|Q8BMQ1_MOUSE;tr|Q54AE3|Q54AE3_MOUSE;sp|Q61011|GBB3_MOUSE	tr|H3BLF7|H3BLF7_MOUSE;tr|H3BKR2|H3BKR2_MOUSE;tr|Q3U1B1|Q3U1B1_MOUSE;tr|Q3TQ70|Q3TQ70_MOUSE;sp|P62874|GBB1_MOUSE;tr|Q61621|Q61621_MOUSE;tr|Q8BMQ1|Q8BMQ1_MOUSE;tr|Q54AE3|Q54AE3_MOUSE;sp|Q61011|GBB3_MOUSE	tr|H3BLF7|H3BLF7_MOUSE Guanine nucleotide-binding protein G(I)/G(S)/G(T) subunit beta-1 (Fragment) OS=Mus musculus GN=Gnb1 PE=1 SV=1;tr|H3BKR2|H3BKR2_MOUSE Guanine nucleotide-binding protein G(I)/G(S)/G(T) subunit beta-1 (Fragment) OS=Mus musculus GN=Gnb1											8012400
tr|H7BX15|H7BX15_MOUSE;tr|E9Q3V9|E9Q3V9_MOUSE;sp|Q80TR1|AGRL1_MOUSE;tr|E9Q9Q9|E9Q9Q9_MOUSE;tr|D6RI60|D6RI60_MOUSE	tr|H7BX15|H7BX15_MOUSE;tr|E9Q3V9|E9Q3V9_MOUSE;sp|Q80TR1|AGRL1_MOUSE;tr|E9Q9Q9|E9Q9Q9_MOUSE	tr|H7BX15|H7BX15_MOUSE Adhesion G protein-coupled receptor L1 OS=Mus musculus GN=Adgrl1 PE=1 SV=1;tr|E9Q3V9|E9Q3V9_MOUSE Adhesion G protein-coupled receptor L1 OS=Mus musculus GN=Adgrl1 PE=1 SV=1;sp|Q80TR1|AGRL1_MOUSE Adhesion G protein-coupled receptor L1		49599000	65689000	48771000				33080000	52172000			36096000
tr|H7BX88|H7BX88_MOUSE;sp|P47934|CACP_MOUSE;tr|F7BF80|F7BF80_MOUSE;tr|B7ZDD7|B7ZDD7_MOUSE	tr|H7BX88|H7BX88_MOUSE;sp|P47934|CACP_MOUSE;tr|F7BF80|F7BF80_MOUSE;tr|B7ZDD7|B7ZDD7_MOUSE	tr|H7BX88|H7BX88_MOUSE Carnitine O-acetyltransferase OS=Mus musculus GN=Crat PE=1 SV=1;sp|P47934|CACP_MOUSE Carnitine O-acetyltransferase OS=Mus musculus GN=Crat PE=1 SV=3;tr|F7BF80|F7BF80_MOUSE Carnitine O-acetyltransferase (Fragment) OS=Mus musculus GN=C						8387900
tr|H9H9R5|H9H9R5_MOUSE;sp|P26262|KLKB1_MOUSE;tr|Q4FJY0|Q4FJY0_MOUSE;tr|Q3TZH4|Q3TZH4_MOUSE;tr|Q3TIP3|Q3TIP3_MOUSE;sp|P04187|GRAB_MOUSE	tr|H9H9R5|H9H9R5_MOUSE;sp|P26262|KLKB1_MOUSE	tr|H9H9R5|H9H9R5_MOUSE Plasma kallikrein OS=Mus musculus GN=Klkb1 PE=1 SV=2;sp|P26262|KLKB1_MOUSE Plasma kallikrein OS=Mus musculus GN=Klkb1 PE=1 SV=2	79894000	150300000	102160000	95752000	60757000	114340000	140600000	155390000	129800000	203730000	203790000	169150000
tr|I6L958|I6L958_MOUSE;tr|Q5R3T5|Q5R3T5_MOUSE;tr|A0A140T8P6|A0A140T8P6_MOUSE	tr|I6L958|I6L958_MOUSE	tr|I6L958|I6L958_MOUSE Igk protein OS=Mus musculus GN=Igk PE=1 SV=1								7800300
tr|I6L985|I6L985_MOUSE;tr|A0A075B5P4|A0A075B5P4_MOUSE;tr|A0A0A6YWR2|A0A0A6YWR2_MOUSE;tr|A0A0C6E3V3|A0A0C6E3V3_MOUSE;tr|A0A0M4KM70|A0A0M4KM70_MOUSE;tr|U5LP42|U5LP42_MOUSE;sp|P01868|IGHG1_MOUSE;sp|P01869|IGH1M_MOUSE;tr|Q99LC4|Q99LC4_MOUSE;tr|A0A075B5R2|A0A075B5R2_MOUSE;tr|X5J4J9|X5J4J9_MOUSE;tr|K7TRG2|K7TRG2_MOUSE;tr|X5J5G7|X5J5G7_MOUSE;tr|X5J5E7|X5J5E7_MOUSE;tr|X5J537|X5J537_MOUSE;tr|X5J4H2|X5J4H2…	tr|I6L985|I6L985_MOUSE;tr|A0A075B5P4|A0A075B5P4_MOUSE;tr|A0A0A6YWR2|A0A0A6YWR2_MOUSE;tr|A0A0C6E3V3|A0A0C6E3V3_MOUSE;tr|A0A0M4KM70|A0A0M4KM70_MOUSE;tr|U5LP42|U5LP42_MOUSE;sp|P01868|IGHG1_MOUSE;sp|P01869|IGH1M_MOUSE;tr|Q99LC4|Q99LC4_MOUSE	tr|I6L985|I6L985_MOUSE Igh protein OS=Mus musculus GN=Igh PE=1 SV=1;tr|A0A075B5P4|A0A075B5P4_MOUSE Ig gamma-1 chain C region secreted form (Fragment) OS=Mus musculus GN=Ighg1 PE=1 SV=1;tr|A0A0A6YWR2|A0A0A6YWR2_MOUSE Ig gamma-1 chain C region secreted form	431515000	891010000	543420000	1418400000	421250000	487010000	692140000	1469600000	846210000	781380000	460760000	548710000
tr|J3QP56|J3QP56_MOUSE;sp|P97823|LYPA1_MOUSE;tr|D3Z269|D3Z269_MOUSE;tr|D3YUG4|D3YUG4_MOUSE;tr|Q4FK51|Q4FK51_MOUSE;tr|J3QQ63|J3QQ63_MOUSE;tr|D3Z111|D3Z111_MOUSE	tr|J3QP56|J3QP56_MOUSE;sp|P97823|LYPA1_MOUSE;tr|D3Z269|D3Z269_MOUSE;tr|D3YUG4|D3YUG4_MOUSE;tr|Q4FK51|Q4FK51_MOUSE	tr|J3QP56|J3QP56_MOUSE Acyl-protein thioesterase 1 OS=Mus musculus GN=Lypla1 PE=1 SV=1;sp|P97823|LYPA1_MOUSE Acyl-protein thioesterase 1 OS=Mus musculus GN=Lypla1 PE=1 SV=1;tr|D3Z269|D3Z269_MOUSE Acyl-protein thioesterase 1 (Fragment) OS=Mus musculus GN=Ly					10004000
tr|J3QP71|J3QP71_MOUSE;tr|K3W4Q8|K3W4Q8_MOUSE;tr|O55108|O55108_MOUSE;tr|O55107|O55107_MOUSE;sp|P18572|BASI_MOUSE	tr|J3QP71|J3QP71_MOUSE;tr|K3W4Q8|K3W4Q8_MOUSE;tr|O55108|O55108_MOUSE;tr|O55107|O55107_MOUSE;sp|P18572|BASI_MOUSE	tr|J3QP71|J3QP71_MOUSE Basigin (Fragment) OS=Mus musculus GN=Bsg PE=1 SV=1;tr|K3W4Q8|K3W4Q8_MOUSE Basigin OS=Mus musculus GN=Bsg PE=1 SV=1;tr|O55108|O55108_MOUSE Basigin (Fragment) OS=Mus musculus GN=Bsg PE=1 SV=1;tr|O55107|O55107_MOUSE Basigin (Fragment)												22764000
tr|K4HPC4|K4HPC4_MOUSE;sp|Q7TQN3|WFKN2_MOUSE	tr|K4HPC4|K4HPC4_MOUSE;sp|Q7TQN3|WFKN2_MOUSE	tr|K4HPC4|K4HPC4_MOUSE Growth and differentiation factor-associated serum protein 1 OS=Mus musculus GN=Wfikkn2 PE=2 SV=1;sp|Q7TQN3|WFKN2_MOUSE WAP, Kazal, immunoglobulin, Kunitz and NTR domain-containing protein 2 OS=Mus musculus GN=Wfikkn2 PE=1 SV=2			10489000
tr|K7U630|K7U630_MOUSE;tr|K7TH39|K7TH39_MOUSE;tr|X5J5R1|X5J5R1_MOUSE;tr|X5J5A4|X5J5A4_MOUSE;tr|X5J4R2|X5J4R2_MOUSE;tr|K7TGU3|K7TGU3_MOUSE;tr|K7TGT6|K7TGT6_MOUSE;tr|K7TR05|K7TR05_MOUSE;tr|K7TH41|K7TH41_MOUSE;tr|K7TDG8|K7TDG8_MOUSE;tr|X5J4F2|X5J4F2_MOUSE;tr|X5J4Q7|X5J4Q7_MOUSE;tr|X5J4W5|X5J4W5_MOUSE;tr|X5J5T5|X5J5T5_MOUSE;tr|X5J5H5|X5J5H5_MOUSE;tr|A0A075B696|A0A075B696_MOUSE	tr|K7U630|K7U630_MOUSE;tr|K7TH39|K7TH39_MOUSE;tr|X5J5R1|X5J5R1_MOUSE;tr|X5J5A4|X5J5A4_MOUSE;tr|X5J4R2|X5J4R2_MOUSE;tr|K7TGU3|K7TGU3_MOUSE;tr|K7TGT6|K7TGT6_MOUSE;tr|K7TR05|K7TR05_MOUSE;tr|K7TH41|K7TH41_MOUSE;tr|K7TDG8|K7TDG8_MOUSE;tr|X5J4F2|X5J4F2_MOUSE;tr|X5J4Q7|X5J4Q7_MOUSE;tr|X5J4W5|X5J4W5_MOUSE;tr|X5J5T5|X5J5T5_MOUSE;tr|X5J5H5|X5J5H5_MOUSE;tr|A0A075B696|A0A075B696_MOUSE	tr|K7U630|K7U630_MOUSE IgM heavy chain variable region (Fragment) OS=Mus musculus PE=2 SV=1;tr|K7TH39|K7TH39_MOUSE IgM heavy chain variable region (Fragment) OS=Mus musculus PE=2 SV=1;tr|X5J5R1|X5J5R1_MOUSE IgG1 heavy chain VDJ region (Fragment) OS=Mus mus											66324000
tr|O09048|O09048_MOUSE;sp|Q925H3|KRA65_MOUSE;tr|O08631|O08631_MOUSE;CON__REFSEQ:XP_001474382	tr|O09048|O09048_MOUSE;sp|Q925H3|KRA65_MOUSE;tr|O08631|O08631_MOUSE;CON__REFSEQ:XP_001474382	tr|O09048|O09048_MOUSE Glycine tyrosine-rich hair keratin protein OS=Mus musculus GN=Krtap6-1 PE=2 SV=1;sp|Q925H3|KRA65_MOUSE Keratin-associated protein 6-5 OS=Mus musculus GN=Krtap6-5 PE=2 SV=1;tr|O08631|O08631_MOUSE Glycine tyrosine-rich hair keratin pro					752390000
tr|O88493|O88493_MOUSE;tr|J3QQ16|J3QQ16_MOUSE;tr|A0A087WS16|A0A087WS16_MOUSE;tr|E9PWQ3|E9PWQ3_MOUSE;tr|Q9Z0I9|Q9Z0I9_MOUSE;tr|D3YWD1|D3YWD1_MOUSE;tr|Q05504|Q05504_MOUSE;tr|Q99K31|Q99K31_MOUSE	tr|O88493|O88493_MOUSE;tr|J3QQ16|J3QQ16_MOUSE;tr|A0A087WS16|A0A087WS16_MOUSE;tr|E9PWQ3|E9PWQ3_MOUSE;tr|Q9Z0I9|Q9Z0I9_MOUSE;tr|D3YWD1|D3YWD1_MOUSE	tr|O88493|O88493_MOUSE Type VI collagen alpha 3 subunit OS=Mus musculus GN=Col6a3 PE=2 SV=1;tr|J3QQ16|J3QQ16_MOUSE Collagen, type VI, alpha 3 OS=Mus musculus GN=Col6a3 PE=1 SV=1;tr|A0A087WS16|A0A087WS16_MOUSE Collagen, type VI, alpha 3 OS=Mus musculus GN=C					22305000
tr|Q0QER9|Q0QER9_MOUSE;tr|Q5HZJ8|Q5HZJ8_MOUSE;tr|Q3TJ51|Q3TJ51_MOUSE;sp|O88844|IDHC_MOUSE;tr|Q8C338|Q8C338_MOUSE;tr|D3YVY3|D3YVY3_MOUSE;tr|A0A087WPT4|A0A087WPT4_MOUSE;tr|A0A087WRS9|A0A087WRS9_MOUSE;tr|A0A087WRM4|A0A087WRM4_MOUSE	tr|Q0QER9|Q0QER9_MOUSE;tr|Q5HZJ8|Q5HZJ8_MOUSE;tr|Q3TJ51|Q3TJ51_MOUSE;sp|O88844|IDHC_MOUSE;tr|Q8C338|Q8C338_MOUSE	tr|Q0QER9|Q0QER9_MOUSE Isocitrate dehydrogenase 1 (Fragment) OS=Mus musculus GN=Idh1 PE=2 SV=1;tr|Q5HZJ8|Q5HZJ8_MOUSE Isocitrate dehydrogenase [NADP] OS=Mus musculus GN=Idh1 PE=2 SV=1;tr|Q3TJ51|Q3TJ51_MOUSE Isocitrate dehydrogenase [NADP] OS=Mus musculus G	48515500				72392000	48023000	57299000	44454000		39220000	58529000	35561000
tr|Q0QEZ4|Q0QEZ4_MOUSE;tr|Q3TE45|Q3TE45_MOUSE;sp|Q9CQA3|SDHB_MOUSE;tr|Q9Z1Z5|Q9Z1Z5_MOUSE	tr|Q0QEZ4|Q0QEZ4_MOUSE;tr|Q3TE45|Q3TE45_MOUSE;sp|Q9CQA3|SDHB_MOUSE;tr|Q9Z1Z5|Q9Z1Z5_MOUSE	tr|Q0QEZ4|Q0QEZ4_MOUSE Succinate dehydrogenase [ubiquinone] iron-sulfur subunit, mitochondrial (Fragment) OS=Mus musculus GN=Sdhb PE=2 SV=1;tr|Q3TE45|Q3TE45_MOUSE Succinate dehydrogenase [ubiquinone] iron-sulfur subunit, mitochondrial OS=Mus musculus GN=Sd					18476000
tr|Q0VGU4|Q0VGU4_MOUSE;tr|A0A087WQ93|A0A087WQ93_MOUSE	tr|Q0VGU4|Q0VGU4_MOUSE	tr|Q0VGU4|Q0VGU4_MOUSE MCG18019 OS=Mus musculus GN=Vgf PE=1 SV=1	1204400000	1543700000	2029500000	2456500000	1296400000	1555800000	1566100000	1398200000	1833100000	1297500000	1387900000	1482200000
tr|Q102J0|Q102J0_MOUSE;sp|Q8R242|DIAC_MOUSE	tr|Q102J0|Q102J0_MOUSE;sp|Q8R242|DIAC_MOUSE	tr|Q102J0|Q102J0_MOUSE Chitobiase, di-N-acetyl-, isoform CRA_a OS=Mus musculus GN=Ctbs PE=2 SV=1;sp|Q8R242|DIAC_MOUSE Di-N-acetylchitobiase OS=Mus musculus GN=Ctbs PE=1 SV=2				29379000		22605000
tr|Q14AX9|Q14AX9_MOUSE;sp|Q64449|MRC2_MOUSE;tr|A2AAA9|A2AAA9_MOUSE	tr|Q14AX9|Q14AX9_MOUSE;sp|Q64449|MRC2_MOUSE;tr|A2AAA9|A2AAA9_MOUSE	tr|Q14AX9|Q14AX9_MOUSE Mannose receptor, C type 2 OS=Mus musculus GN=Mrc2 PE=2 SV=1;sp|Q64449|MRC2_MOUSE C-type mannose receptor 2 OS=Mus musculus GN=Mrc2 PE=1 SV=3;tr|A2AAA9|A2AAA9_MOUSE C-type mannose receptor 2 OS=Mus musculus GN=Mrc2 PE=1 SV=1				20712000	21468000	15798000	21010000
tr|Q14BH8|Q14BH8_MOUSE;tr|E9Q1X8|E9Q1X8_MOUSE;sp|O08532|CA2D1_MOUSE;sp|Q6PHS9|CA2D2_MOUSE;tr|E9Q683|E9Q683_MOUSE	tr|Q14BH8|Q14BH8_MOUSE;tr|E9Q1X8|E9Q1X8_MOUSE;sp|O08532|CA2D1_MOUSE	tr|Q14BH8|Q14BH8_MOUSE Cacna2d1 protein OS=Mus musculus GN=Cacna2d1 PE=2 SV=1;tr|E9Q1X8|E9Q1X8_MOUSE Voltage-dependent calcium channel subunit alpha-2/delta-1 OS=Mus musculus GN=Cacna2d1 PE=1 SV=2;sp|O08532|CA2D1_MOUSE Voltage-dependent calcium channel sub		54265000	61648000	57212000		60466000	48531000
tr|Q1HL22|Q1HL22_MOUSE;sp|Q8VI51|SORC3_MOUSE	tr|Q1HL22|Q1HL22_MOUSE;sp|Q8VI51|SORC3_MOUSE	tr|Q1HL22|Q1HL22_MOUSE SorCS3 OS=Mus musculus GN=Sorcs3 PE=1 SV=1;sp|Q8VI51|SORC3_MOUSE VPS10 domain-containing receptor SorCS3 OS=Mus musculus GN=Sorcs3 PE=1 SV=1		28230000							31399000			27896000
tr|Q2TJH4|Q2TJH4_MOUSE;tr|E0CXD4|E0CXD4_MOUSE;tr|Q8QZT6|Q8QZT6_MOUSE;tr|Q8CFX3|Q8CFX3_MOUSE;tr|F7BJK1|F7BJK1_MOUSE	tr|Q2TJH4|Q2TJH4_MOUSE;tr|E0CXD4|E0CXD4_MOUSE;tr|Q8QZT6|Q8QZT6_MOUSE;tr|Q8CFX3|Q8CFX3_MOUSE;tr|F7BJK1|F7BJK1_MOUSE	tr|Q2TJH4|Q2TJH4_MOUSE Protocadherin 1 (Fragment) OS=Mus musculus GN=Pcdh1 PE=2 SV=1;tr|E0CXD4|E0CXD4_MOUSE Protocadherin 1 OS=Mus musculus GN=Pcdh1 PE=1 SV=1;tr|Q8QZT6|Q8QZT6_MOUSE Pcdh1 protein (Fragment) OS=Mus musculus GN=Pcdh1 PE=2 SV=1;tr|Q8CFX3|Q8CF		13730000
tr|Q32MU0|Q32MU0_MOUSE;sp|P63239|NEC1_MOUSE	tr|Q32MU0|Q32MU0_MOUSE;sp|P63239|NEC1_MOUSE	tr|Q32MU0|Q32MU0_MOUSE Proprotein convertase subtilisin/kexin type 1 OS=Mus musculus GN=Pcsk1 PE=2 SV=1;sp|P63239|NEC1_MOUSE Neuroendocrine convertase 1 OS=Mus musculus GN=Pcsk1 PE=1 SV=1									10592000
tr|Q3KQQ1|Q3KQQ1_MOUSE;sp|Q9CZ44|NSF1C_MOUSE;tr|Q3UVN5|Q3UVN5_MOUSE;tr|A2AT02|A2AT02_MOUSE	tr|Q3KQQ1|Q3KQQ1_MOUSE;sp|Q9CZ44|NSF1C_MOUSE;tr|Q3UVN5|Q3UVN5_MOUSE;tr|A2AT02|A2AT02_MOUSE	tr|Q3KQQ1|Q3KQQ1_MOUSE Nsfl1c protein (Fragment) OS=Mus musculus GN=Nsfl1c PE=2 SV=1;sp|Q9CZ44|NSF1C_MOUSE NSFL1 cofactor p47 OS=Mus musculus GN=Nsfl1c PE=1 SV=1;tr|Q3UVN5|Q3UVN5_MOUSE Uncharacterized protein OS=Mus musculus GN=Nsfl1c PE=2 SV=1;tr|A2AT02|A							8120200
tr|Q3KQQ2|Q3KQQ2_MOUSE;sp|P04939|MUP3_MOUSE;tr|Q80YX8|Q80YX8_MOUSE;tr|A9R9V7|A9R9V7_MOUSE;tr|A2ANT5|A2ANT5_MOUSE;sp|P11590|MUP4_MOUSE	tr|Q3KQQ2|Q3KQQ2_MOUSE;sp|P04939|MUP3_MOUSE	tr|Q3KQQ2|Q3KQQ2_MOUSE MCG15829, isoform CRA_a OS=Mus musculus GN=Mup3 PE=1 SV=1;sp|P04939|MUP3_MOUSE Major urinary protein 3 OS=Mus musculus GN=Mup3 PE=1 SV=1		115070000	61088000	109840000			66115000	85674000	158040000	93637000	64010000	111390000
tr|Q3TAZ7|Q3TAZ7_MOUSE;tr|Q3U4N8|Q3U4N8_MOUSE;tr|Q3U1X4|Q3U1X4_MOUSE;tr|Q6NXV8|Q6NXV8_MOUSE;tr|Q3UKC6|Q3UKC6_MOUSE;tr|Q3U210|Q3U210_MOUSE;tr|Q3U1Y3|Q3U1Y3_MOUSE;tr|Q0P635|Q0P635_MOUSE;sp|P09581|CSF1R_MOUSE;tr|Q3TBH6|Q3TBH6_MOUSE;tr|Q3U3W0|Q3U3W0_MOUSE	tr|Q3TAZ7|Q3TAZ7_MOUSE;tr|Q3U4N8|Q3U4N8_MOUSE;tr|Q3U1X4|Q3U1X4_MOUSE;tr|Q6NXV8|Q6NXV8_MOUSE;tr|Q3UKC6|Q3UKC6_MOUSE;tr|Q3U210|Q3U210_MOUSE;tr|Q3U1Y3|Q3U1Y3_MOUSE;tr|Q0P635|Q0P635_MOUSE;sp|P09581|CSF1R_MOUSE;tr|Q3TBH6|Q3TBH6_MOUSE;tr|Q3U3W0|Q3U3W0_MOUSE	tr|Q3TAZ7|Q3TAZ7_MOUSE Uncharacterized protein OS=Mus musculus GN=Csf1r PE=2 SV=1;tr|Q3U4N8|Q3U4N8_MOUSE Receptor protein-tyrosine kinase (Fragment) OS=Mus musculus GN=Csf1r PE=2 SV=1;tr|Q3U1X4|Q3U1X4_MOUSE Receptor protein-tyrosine kinase (Fragment) OS=Mu	138905000	182000000	224830000	205700000	106140000	153900000	126270000	153350000	214940000	132510000	131040000	141920000
tr|Q3TBF1|Q3TBF1_MOUSE;sp|Q08642|PADI2_MOUSE;tr|A3KME9|A3KME9_MOUSE	tr|Q3TBF1|Q3TBF1_MOUSE;sp|Q08642|PADI2_MOUSE;tr|A3KME9|A3KME9_MOUSE	tr|Q3TBF1|Q3TBF1_MOUSE Uncharacterized protein OS=Mus musculus GN=Padi2 PE=2 SV=1;sp|Q08642|PADI2_MOUSE Protein-arginine deiminase type-2 OS=Mus musculus GN=Padi2 PE=1 SV=2;tr|A3KME9|A3KME9_MOUSE Padi2 protein (Fragment) OS=Mus musculus GN=Padi2 PE=2 SV=1	57595000	37823000			31009000	42718000	42098000
tr|Q3TBG7|Q3TBG7_MOUSE;sp|P21570|ANGI_MOUSE	tr|Q3TBG7|Q3TBG7_MOUSE;sp|P21570|ANGI_MOUSE	tr|Q3TBG7|Q3TBG7_MOUSE MCG16519, isoform CRA_a OS=Mus musculus GN=Ang PE=2 SV=1;sp|P21570|ANGI_MOUSE Angiogenin OS=Mus musculus GN=Ang PE=1 SV=1										15467000
tr|Q3TBM1|Q3TBM1_MOUSE;sp|O09159|MA2B1_MOUSE;tr|Q3TB95|Q3TB95_MOUSE	tr|Q3TBM1|Q3TBM1_MOUSE;sp|O09159|MA2B1_MOUSE	tr|Q3TBM1|Q3TBM1_MOUSE Alpha-mannosidase OS=Mus musculus GN=Man2b1 PE=2 SV=1;sp|O09159|MA2B1_MOUSE Lysosomal alpha-mannosidase OS=Mus musculus GN=Man2b1 PE=1 SV=4	46198500	84250000	114420000	111090000	31324000	63660000	47182000	39491000	91696000	72159000	55727000	59700000
tr|Q3TEL0|Q3TEL0_MOUSE;tr|Q3UB92|Q3UB92_MOUSE;tr|Q3U6W3|Q3U6W3_MOUSE;tr|Q3U6J9|Q3U6J9_MOUSE;tr|Q3TAR8|Q3TAR8_MOUSE;sp|O88531|PPT1_MOUSE;tr|Q8VBX5|Q8VBX5_MOUSE	tr|Q3TEL0|Q3TEL0_MOUSE;tr|Q3UB92|Q3UB92_MOUSE;tr|Q3U6W3|Q3U6W3_MOUSE;tr|Q3U6J9|Q3U6J9_MOUSE;tr|Q3TAR8|Q3TAR8_MOUSE;sp|O88531|PPT1_MOUSE;tr|Q8VBX5|Q8VBX5_MOUSE	tr|Q3TEL0|Q3TEL0_MOUSE Uncharacterized protein OS=Mus musculus GN=Ppt1 PE=2 SV=1;tr|Q3UB92|Q3UB92_MOUSE Uncharacterized protein OS=Mus musculus GN=Ppt1 PE=2 SV=1;tr|Q3U6W3|Q3U6W3_MOUSE Uncharacterized protein OS=Mus musculus GN=Ppt1 PE=2 SV=1;tr|Q3U6J9|Q3U				5167800
tr|Q3TF08|Q3TF08_MOUSE;sp|Q00724|RET4_MOUSE;tr|H7BWY6|H7BWY6_MOUSE	tr|Q3TF08|Q3TF08_MOUSE;sp|Q00724|RET4_MOUSE;tr|H7BWY6|H7BWY6_MOUSE	tr|Q3TF08|Q3TF08_MOUSE Uncharacterized protein (Fragment) OS=Mus musculus GN=Rbp4 PE=2 SV=1;sp|Q00724|RET4_MOUSE Retinol-binding protein 4 OS=Mus musculus GN=Rbp4 PE=1 SV=2;tr|H7BWY6|H7BWY6_MOUSE Retinol-binding protein 4 OS=Mus musculus GN=Rbp4 PE=1 SV=1	454865000	833820000	720810000	979010000	384340000	496070000	625610000	836080000	821920000	458820000	502920000	663070000
tr|Q3TF41|Q3TF41_MOUSE;tr|Q8BSH9|Q8BSH9_MOUSE;sp|P28656|NP1L1_MOUSE;tr|E9PW66|E9PW66_MOUSE;tr|Q9CSP8|Q9CSP8_MOUSE	tr|Q3TF41|Q3TF41_MOUSE;tr|Q8BSH9|Q8BSH9_MOUSE;sp|P28656|NP1L1_MOUSE;tr|E9PW66|E9PW66_MOUSE;tr|Q9CSP8|Q9CSP8_MOUSE	tr|Q3TF41|Q3TF41_MOUSE Nucleosome assembly protein 1-like 1 OS=Mus musculus GN=Nap1l1 PE=1 SV=1;tr|Q8BSH9|Q8BSH9_MOUSE Nucleosome assembly protein 1-like 1 OS=Mus musculus GN=Nap1l1 PE=1 SV=1;sp|P28656|NP1L1_MOUSE Nucleosome assembly protein 1-like 1 OS=Mu							4589200
tr|Q3TFE8|Q3TFE8_MOUSE;tr|Q7TSZ6|Q7TSZ6_MOUSE;tr|Q3UHW8|Q3UHW8_MOUSE;sp|P70168|IMB1_MOUSE	tr|Q3TFE8|Q3TFE8_MOUSE;tr|Q7TSZ6|Q7TSZ6_MOUSE;tr|Q3UHW8|Q3UHW8_MOUSE;sp|P70168|IMB1_MOUSE	tr|Q3TFE8|Q3TFE8_MOUSE Uncharacterized protein OS=Mus musculus GN=Kpnb1 PE=2 SV=1;tr|Q7TSZ6|Q7TSZ6_MOUSE Karyopherin (Importin) beta 1 OS=Mus musculus GN=Kpnb1 PE=2 SV=1;tr|Q3UHW8|Q3UHW8_MOUSE Uncharacterized protein OS=Mus musculus GN=Kpnb1 PE=2 SV=1;sp|P						6270500
tr|Q3TFP8|Q3TFP8_MOUSE;tr|Q3TXU8|Q3TXU8_MOUSE;tr|Q3TH84|Q3TH84_MOUSE;sp|O55022|PGRC1_MOUSE	tr|Q3TFP8|Q3TFP8_MOUSE;tr|Q3TXU8|Q3TXU8_MOUSE;tr|Q3TH84|Q3TH84_MOUSE;sp|O55022|PGRC1_MOUSE	tr|Q3TFP8|Q3TFP8_MOUSE Uncharacterized protein OS=Mus musculus GN=Pgrmc1 PE=2 SV=1;tr|Q3TXU8|Q3TXU8_MOUSE Progesterone receptor membrane component 1 OS=Mus musculus GN=Pgrmc1 PE=1 SV=1;tr|Q3TH84|Q3TH84_MOUSE Uncharacterized protein OS=Mus musculus GN=Pgrmc											25256000
tr|Q3TGJ9|Q3TGJ9_MOUSE;tr|A6PWS5|A6PWS5_MOUSE	tr|Q3TGJ9|Q3TGJ9_MOUSE	tr|Q3TGJ9|Q3TGJ9_MOUSE Uncharacterized protein OS=Mus musculus GN=Gsn PE=2 SV=1									35296000
tr|Q3TGR2|Q3TGR2_MOUSE;sp|Q8K0E8|FIBB_MOUSE;CON__P02676	tr|Q3TGR2|Q3TGR2_MOUSE;sp|Q8K0E8|FIBB_MOUSE	tr|Q3TGR2|Q3TGR2_MOUSE Fibrinogen, B beta polypeptide, isoform CRA_a OS=Mus musculus GN=Fgb PE=1 SV=1;sp|Q8K0E8|FIBB_MOUSE Fibrinogen beta chain OS=Mus musculus GN=Fgb PE=1 SV=1	253035000	478960000	456830000	376950000	385130000	411130000	443950000	465420000	765410000	400770000	408870000	565880000
tr|Q3THG0|Q3THG0_MOUSE;tr|Q3TF25|Q3TF25_MOUSE;sp|Q9DB20|ATPO_MOUSE;tr|F7D3P8|F7D3P8_MOUSE;tr|F6XVM5|F6XVM5_MOUSE	tr|Q3THG0|Q3THG0_MOUSE;tr|Q3TF25|Q3TF25_MOUSE;sp|Q9DB20|ATPO_MOUSE;tr|F7D3P8|F7D3P8_MOUSE	tr|Q3THG0|Q3THG0_MOUSE Uncharacterized protein OS=Mus musculus GN=Atp5o PE=2 SV=1;tr|Q3TF25|Q3TF25_MOUSE Uncharacterized protein OS=Mus musculus GN=Atp5o PE=2 SV=1;sp|Q9DB20|ATPO_MOUSE ATP synthase subunit O, mitochondrial OS=Mus musculus GN=Atp5o PE=1 SV=					27689000	82326000	22424000		18609000
tr|Q3THQ5|Q3THQ5_MOUSE;sp|Q60864|STIP1_MOUSE	tr|Q3THQ5|Q3THQ5_MOUSE;sp|Q60864|STIP1_MOUSE	tr|Q3THQ5|Q3THQ5_MOUSE Uncharacterized protein OS=Mus musculus GN=Stip1 PE=2 SV=1;sp|Q60864|STIP1_MOUSE Stress-induced-phosphoprotein 1 OS=Mus musculus GN=Stip1 PE=1 SV=1	65252000
tr|Q3TIC8|Q3TIC8_MOUSE;sp|Q9CZ13|QCR1_MOUSE;tr|Q3THM1|Q3THM1_MOUSE;tr|Q8VEJ2|Q8VEJ2_MOUSE;tr|Q8K2S8|Q8K2S8_MOUSE;tr|A0A0A6YW82|A0A0A6YW82_MOUSE;tr|A0A0A6YWX6|A0A0A6YWX6_MOUSE;tr|A0A0A6YVZ0|A0A0A6YVZ0_MOUSE	tr|Q3TIC8|Q3TIC8_MOUSE;sp|Q9CZ13|QCR1_MOUSE;tr|Q3THM1|Q3THM1_MOUSE	tr|Q3TIC8|Q3TIC8_MOUSE Uncharacterized protein OS=Mus musculus GN=Uqcrc1 PE=2 SV=1;sp|Q9CZ13|QCR1_MOUSE Cytochrome b-c1 complex subunit 1, mitochondrial OS=Mus musculus GN=Uqcrc1 PE=1 SV=2;tr|Q3THM1|Q3THM1_MOUSE Uncharacterized protein OS=Mus musculus GN=U					143490000	167390000	88292000
tr|Q3TIU7|Q3TIU7_MOUSE;tr|Q3UIQ2|Q3UIQ2_MOUSE;sp|Q91VD9|NDUS1_MOUSE;tr|A0A087WQ77|A0A087WQ77_MOUSE	tr|Q3TIU7|Q3TIU7_MOUSE;tr|Q3UIQ2|Q3UIQ2_MOUSE;sp|Q91VD9|NDUS1_MOUSE	tr|Q3TIU7|Q3TIU7_MOUSE Uncharacterized protein OS=Mus musculus GN=Ndufs1 PE=2 SV=1;tr|Q3UIQ2|Q3UIQ2_MOUSE Uncharacterized protein OS=Mus musculus GN=Ndufs1 PE=2 SV=1;sp|Q91VD9|NDUS1_MOUSE NADH-ubiquinone oxidoreductase 75 kDa subunit, mitochondrial OS=Mus					25414000	37367000
tr|Q3TJ94|Q3TJ94_MOUSE;sp|P19221|THRB_MOUSE;tr|H7BX99|H7BX99_MOUSE	tr|Q3TJ94|Q3TJ94_MOUSE;sp|P19221|THRB_MOUSE;tr|H7BX99|H7BX99_MOUSE	tr|Q3TJ94|Q3TJ94_MOUSE Prothrombin OS=Mus musculus GN=F2 PE=1 SV=1;sp|P19221|THRB_MOUSE Prothrombin OS=Mus musculus GN=F2 PE=1 SV=1;tr|H7BX99|H7BX99_MOUSE Prothrombin OS=Mus musculus GN=F2 PE=1 SV=1	688700000	948110000	845830000	791340000	749020000	746550000	855930000	882390000	947750000	933410000	732600000	850130000
tr|Q3TKX1|Q3TKX1_MOUSE;tr|Q3UCY7|Q3UCY7_MOUSE;tr|Q3TWN7|Q3TWN7_MOUSE;sp|Q9R1Q9|VAS1_MOUSE;tr|Q571E2|Q571E2_MOUSE;tr|B7FAU3|B7FAU3_MOUSE;tr|Q3UWN7|Q3UWN7_MOUSE;tr|Q3TT23|Q3TT23_MOUSE;tr|Q3THZ3|Q3THZ3_MOUSE;tr|F6X9J0|F6X9J0_MOUSE;tr|B7FAU7|B7FAU7_MOUSE;tr|F6ZE56|F6ZE56_MOUSE	tr|Q3TKX1|Q3TKX1_MOUSE;tr|Q3UCY7|Q3UCY7_MOUSE;tr|Q3TWN7|Q3TWN7_MOUSE;sp|Q9R1Q9|VAS1_MOUSE;tr|Q571E2|Q571E2_MOUSE;tr|B7FAU3|B7FAU3_MOUSE;tr|Q3UWN7|Q3UWN7_MOUSE;tr|Q3TT23|Q3TT23_MOUSE;tr|Q3THZ3|Q3THZ3_MOUSE	tr|Q3TKX1|Q3TKX1_MOUSE ATPase, H+ transporting, lysosomal accessory protein OS=Mus musculus GN=Atp6ap1 PE=1 SV=1;tr|Q3UCY7|Q3UCY7_MOUSE Uncharacterized protein OS=Mus musculus GN=Atp6ap1 PE=2 SV=1;tr|Q3TWN7|Q3TWN7_MOUSE ATPase, H+ transporting, lysosomal a	181515000	274850000	245280000	368520000	185260000	345360000	237930000	221930000	244460000	172350000	140660000	191230000
tr|Q3TLW5|Q3TLW5_MOUSE;sp|Q02013|AQP1_MOUSE	tr|Q3TLW5|Q3TLW5_MOUSE;sp|Q02013|AQP1_MOUSE	tr|Q3TLW5|Q3TLW5_MOUSE Uncharacterized protein OS=Mus musculus GN=Aqp1 PE=2 SV=1;sp|Q02013|AQP1_MOUSE Aquaporin-1 OS=Mus musculus GN=Aqp1 PE=1 SV=3										24186000
tr|Q3TN85|Q3TN85_MOUSE;tr|Q8CAP3|Q8CAP3_MOUSE;sp|P54726|RD23A_MOUSE;tr|Q8BRA9|Q8BRA9_MOUSE;tr|F6YL88|F6YL88_MOUSE;tr|Q3TJ52|Q3TJ52_MOUSE;tr|Q3UQN3|Q3UQN3_MOUSE;tr|Q6NVC3|Q6NVC3_MOUSE;tr|Q3U041|Q3U041_MOUSE;sp|P54728|RD23B_MOUSE;tr|Q9D717|Q9D717_MOUSE	tr|Q3TN85|Q3TN85_MOUSE;tr|Q8CAP3|Q8CAP3_MOUSE;sp|P54726|RD23A_MOUSE;tr|Q8BRA9|Q8BRA9_MOUSE	tr|Q3TN85|Q3TN85_MOUSE UV excision repair protein RAD23 homolog A (Fragment) OS=Mus musculus GN=Rad23a PE=1 SV=1;tr|Q8CAP3|Q8CAP3_MOUSE Rad23a protein OS=Mus musculus GN=Rad23a PE=1 SV=1;sp|P54726|RD23A_MOUSE UV excision repair protein RAD23 homolog A OS=M	19202000
tr|Q3TNY9|Q3TNY9_MOUSE;sp|P28653|PGS1_MOUSE;tr|Q3UXK8|Q3UXK8_MOUSE;tr|Q3TAF9|Q3TAF9_MOUSE;tr|Q7TMW3|Q7TMW3_MOUSE;tr|Q6PG76|Q6PG76_MOUSE	tr|Q3TNY9|Q3TNY9_MOUSE;sp|P28653|PGS1_MOUSE;tr|Q3UXK8|Q3UXK8_MOUSE;tr|Q3TAF9|Q3TAF9_MOUSE;tr|Q7TMW3|Q7TMW3_MOUSE	tr|Q3TNY9|Q3TNY9_MOUSE Biglycan OS=Mus musculus GN=Bgn PE=1 SV=1;sp|P28653|PGS1_MOUSE Biglycan OS=Mus musculus GN=Bgn PE=1 SV=1;tr|Q3UXK8|Q3UXK8_MOUSE Biglycan OS=Mus musculus GN=Bgn PE=2 SV=1;tr|Q3TAF9|Q3TAF9_MOUSE Biglycan OS=Mus musculus GN=Bgn PE=2 SV=		23159000			195590000	81768000	84152000	48900000	62366000		49075000
tr|Q3TP88|Q3TP88_MOUSE;tr|Q3TUE2|Q3TUE2_MOUSE;tr|Q3TX57|Q3TX57_MOUSE;tr|Q3TU64|Q3TU64_MOUSE;sp|Q01149|CO1A2_MOUSE;tr|Q91VL4|Q91VL4_MOUSE	tr|Q3TP88|Q3TP88_MOUSE;tr|Q3TUE2|Q3TUE2_MOUSE;tr|Q3TX57|Q3TX57_MOUSE;tr|Q3TU64|Q3TU64_MOUSE;sp|Q01149|CO1A2_MOUSE;tr|Q91VL4|Q91VL4_MOUSE	tr|Q3TP88|Q3TP88_MOUSE Uncharacterized protein (Fragment) OS=Mus musculus GN=Col1a2 PE=2 SV=1;tr|Q3TUE2|Q3TUE2_MOUSE Uncharacterized protein (Fragment) OS=Mus musculus GN=Col1a2 PE=2 SV=1;tr|Q3TX57|Q3TX57_MOUSE Procollagen, type I, alpha 2 OS=Mus musculus	98795000	165110000	152870000	166140000	160100000	175590000	150440000	102590000	112190000	74606000		94727000
tr|Q3TQF7|Q3TQF7_MOUSE;tr|Q05DU9|Q05DU9_MOUSE;tr|Q3U0I4|Q3U0I4_MOUSE;sp|P97857|ATS1_MOUSE	tr|Q3TQF7|Q3TQF7_MOUSE;tr|Q05DU9|Q05DU9_MOUSE;tr|Q3U0I4|Q3U0I4_MOUSE;sp|P97857|ATS1_MOUSE	tr|Q3TQF7|Q3TQF7_MOUSE Uncharacterized protein (Fragment) OS=Mus musculus GN=Adamts1 PE=2 SV=1;tr|Q05DU9|Q05DU9_MOUSE Adamts1 protein (Fragment) OS=Mus musculus GN=Adamts1 PE=2 SV=1;tr|Q3U0I4|Q3U0I4_MOUSE Uncharacterized protein OS=Mus musculus GN=Adamts1		35805000		70560000
tr|Q3TQP7|Q3TQP7_MOUSE;sp|Q8QZT1|THIL_MOUSE	tr|Q3TQP7|Q3TQP7_MOUSE;sp|Q8QZT1|THIL_MOUSE	tr|Q3TQP7|Q3TQP7_MOUSE Uncharacterized protein OS=Mus musculus GN=Acat1 PE=2 SV=1;sp|Q8QZT1|THIL_MOUSE Acetyl-CoA acetyltransferase, mitochondrial OS=Mus musculus GN=Acat1 PE=1 SV=1		32090000			67513000	89788000	45418000				28295000
tr|Q3TR40|Q3TR40_MOUSE;sp|P35441|TSP1_MOUSE;tr|Q8CGB2|Q8CGB2_MOUSE;tr|Q80YQ1|Q80YQ1_MOUSE	tr|Q3TR40|Q3TR40_MOUSE;sp|P35441|TSP1_MOUSE;tr|Q8CGB2|Q8CGB2_MOUSE;tr|Q80YQ1|Q80YQ1_MOUSE	tr|Q3TR40|Q3TR40_MOUSE Uncharacterized protein OS=Mus musculus GN=Thbs1 PE=2 SV=1;sp|P35441|TSP1_MOUSE Thrombospondin-1 OS=Mus musculus GN=Thbs1 PE=1 SV=1;tr|Q8CGB2|Q8CGB2_MOUSE Thrombospondin 1 OS=Mus musculus GN=Thbs1 PE=2 SV=1;tr|Q80YQ1|Q80YQ1_MOUSE Thr	2158000
tr|Q3TR66|Q3TR66_MOUSE;sp|Q08761|PROS_MOUSE;tr|Q3V0M0|Q3V0M0_MOUSE	tr|Q3TR66|Q3TR66_MOUSE;sp|Q08761|PROS_MOUSE	tr|Q3TR66|Q3TR66_MOUSE Protein S (Alpha) OS=Mus musculus GN=Pros1 PE=2 SV=1;sp|Q08761|PROS_MOUSE Vitamin K-dependent protein S OS=Mus musculus GN=Pros1 PE=2 SV=1		14706000
tr|Q3TRI2|Q3TRI2_MOUSE;tr|E9PX84|E9PX84_MOUSE;tr|Q3TRE6|Q3TRE6_MOUSE;tr|Q3TMQ2|Q3TMQ2_MOUSE;tr|F6TQN9|F6TQN9_MOUSE;tr|E9QL31|E9QL31_MOUSE;tr|A0A0R4J104|A0A0R4J104_MOUSE;sp|P98078|DAB2_MOUSE;tr|Q9DCE6|Q9DCE6_MOUSE;tr|E0CXT5|E0CXT5_MOUSE;tr|Q3TN55|Q3TN55_MOUSE	tr|Q3TRI2|Q3TRI2_MOUSE;tr|E9PX84|E9PX84_MOUSE;tr|Q3TRE6|Q3TRE6_MOUSE;tr|Q3TMQ2|Q3TMQ2_MOUSE;tr|F6TQN9|F6TQN9_MOUSE;tr|E9QL31|E9QL31_MOUSE;tr|A0A0R4J104|A0A0R4J104_MOUSE;sp|P98078|DAB2_MOUSE;tr|Q9DCE6|Q9DCE6_MOUSE;tr|E0CXT5|E0CXT5_MOUSE;tr|Q3TN55|Q3TN55_MOUSE	tr|Q3TRI2|Q3TRI2_MOUSE Uncharacterized protein OS=Mus musculus GN=Dab2 PE=2 SV=1;tr|E9PX84|E9PX84_MOUSE Disabled homolog 2 OS=Mus musculus GN=Dab2 PE=1 SV=1;tr|Q3TRE6|Q3TRE6_MOUSE Disabled homolog 2 OS=Mus musculus GN=Dab2 PE=1 SV=1;tr|Q3TMQ2|Q3TMQ2_MOUSE						8836900
tr|Q3TT51|Q3TT51_MOUSE;sp|P12961|7B2_MOUSE	tr|Q3TT51|Q3TT51_MOUSE;sp|P12961|7B2_MOUSE	tr|Q3TT51|Q3TT51_MOUSE Secretogranin V, isoform CRA_b OS=Mus musculus GN=Scg5 PE=1 SV=1;sp|P12961|7B2_MOUSE Neuroendocrine protein 7B2 OS=Mus musculus GN=Scg5 PE=1 SV=1	449720000	1000500000	1086600000	1453300000	575340000	972870000	705770000	655780000	849730000	504940000	595290000	675410000
tr|Q3TT92|Q3TT92_MOUSE;sp|Q62188|DPYL3_MOUSE;tr|E9PWE8|E9PWE8_MOUSE;tr|Q3TAS8|Q3TAS8_MOUSE;tr|D3YUS0|D3YUS0_MOUSE;tr|D3Z567|D3Z567_MOUSE	tr|Q3TT92|Q3TT92_MOUSE;sp|Q62188|DPYL3_MOUSE;tr|E9PWE8|E9PWE8_MOUSE;tr|Q3TAS8|Q3TAS8_MOUSE;tr|D3YUS0|D3YUS0_MOUSE	tr|Q3TT92|Q3TT92_MOUSE Dihydropyrimidinase-related protein 3 OS=Mus musculus GN=Dpysl3 PE=1 SV=1;sp|Q62188|DPYL3_MOUSE Dihydropyrimidinase-related protein 3 OS=Mus musculus GN=Dpysl3 PE=1 SV=1;tr|E9PWE8|E9PWE8_MOUSE Dihydropyrimidinase-related protein 3 OS					40913000	30481000	29315000			28757000	25599000	19787000
tr|Q3TU85|Q3TU85_MOUSE;tr|Q3TAI8|Q3TAI8_MOUSE;tr|A1E2B8|A1E2B8_MOUSE;sp|Q61696|HS71A_MOUSE;sp|P17879|HS71B_MOUSE	tr|Q3TU85|Q3TU85_MOUSE;tr|Q3TAI8|Q3TAI8_MOUSE;tr|A1E2B8|A1E2B8_MOUSE;sp|Q61696|HS71A_MOUSE;sp|P17879|HS71B_MOUSE	tr|Q3TU85|Q3TU85_MOUSE Heat shock protein 1B OS=Mus musculus GN=Hspa1b PE=1 SV=1;tr|Q3TAI8|Q3TAI8_MOUSE Uncharacterized protein OS=Mus musculus PE=2 SV=1;tr|A1E2B8|A1E2B8_MOUSE Inducible heat shock protein 70 OS=Mus musculus PE=3 SV=1;sp|Q61696|HS71A_MOUSE						3591100
tr|Q3TVS6|Q3TVS6_MOUSE;sp|P10605|CATB_MOUSE;tr|Q3TC17|Q3TC17_MOUSE;tr|Q6LAF6|Q6LAF6_MOUSE	tr|Q3TVS6|Q3TVS6_MOUSE;sp|P10605|CATB_MOUSE;tr|Q3TC17|Q3TC17_MOUSE	tr|Q3TVS6|Q3TVS6_MOUSE Uncharacterized protein OS=Mus musculus GN=Ctsb PE=2 SV=1;sp|P10605|CATB_MOUSE Cathepsin B OS=Mus musculus GN=Ctsb PE=1 SV=2;tr|Q3TC17|Q3TC17_MOUSE Uncharacterized protein OS=Mus musculus GN=Ctsb PE=2 SV=1	635640000	689600000	784290000	810040000	425890000	512060000	566070000	620540000	1138100000	988310000	771360000	1115700000
tr|Q3TXB7|Q3TXB7_MOUSE;tr|F8WI14|F8WI14_MOUSE;tr|D3YV64|D3YV64_MOUSE;tr|D3Z772|D3Z772_MOUSE	tr|Q3TXB7|Q3TXB7_MOUSE;tr|F8WI14|F8WI14_MOUSE	tr|Q3TXB7|Q3TXB7_MOUSE Uncharacterized protein OS=Mus musculus GN=Ecm1 PE=2 SV=1;tr|F8WI14|F8WI14_MOUSE Extracellular matrix protein 1 OS=Mus musculus GN=Ecm1 PE=1 SV=1				11884000
tr|Q3TXF9|Q3TXF9_MOUSE;sp|Q8VDN2|AT1A1_MOUSE	tr|Q3TXF9|Q3TXF9_MOUSE;sp|Q8VDN2|AT1A1_MOUSE	tr|Q3TXF9|Q3TXF9_MOUSE Sodium/potassium-transporting ATPase subunit alpha OS=Mus musculus GN=Atp1a1 PE=2 SV=1;sp|Q8VDN2|AT1A1_MOUSE Sodium/potassium-transporting ATPase subunit alpha-1 OS=Mus musculus GN=Atp1a1 PE=1 SV=1
tr|Q3TXN1|Q3TXN1_MOUSE;sp|Q8VDQ1|PTGR2_MOUSE;tr|D6RGL6|D6RGL6_MOUSE	tr|Q3TXN1|Q3TXN1_MOUSE;sp|Q8VDQ1|PTGR2_MOUSE	tr|Q3TXN1|Q3TXN1_MOUSE Prostaglandin reductase 2 OS=Mus musculus GN=Ptgr2 PE=1 SV=1;sp|Q8VDQ1|PTGR2_MOUSE Prostaglandin reductase 2 OS=Mus musculus GN=Ptgr2 PE=1 SV=2	9811200
tr|Q3TXR9|Q3TXR9_MOUSE;sp|P20060|HEXB_MOUSE	tr|Q3TXR9|Q3TXR9_MOUSE;sp|P20060|HEXB_MOUSE	tr|Q3TXR9|Q3TXR9_MOUSE Beta-hexosaminidase OS=Mus musculus GN=Hexb PE=1 SV=1;sp|P20060|HEXB_MOUSE Beta-hexosaminidase subunit beta OS=Mus musculus GN=Hexb PE=1 SV=2	698735000	1261900000	1412600000	1597300000	552950000	808700000	658590000	682600000	1262700000	823650000	683090000	801660000
tr|Q3TXV7|Q3TXV7_MOUSE;tr|Q8BNS6|Q8BNS6_MOUSE;tr|Q3UCP6|Q3UCP6_MOUSE;tr|Q3U936|Q3U936_MOUSE;tr|Q3TW10|Q3TW10_MOUSE;tr|Q3TVI2|Q3TVI2_MOUSE;tr|Q3TKF6|Q3TKF6_MOUSE;tr|Q3THQ0|Q3THQ0_MOUSE;sp|P29416|HEXA_MOUSE	tr|Q3TXV7|Q3TXV7_MOUSE;tr|Q8BNS6|Q8BNS6_MOUSE;tr|Q3UCP6|Q3UCP6_MOUSE;tr|Q3U936|Q3U936_MOUSE;tr|Q3TW10|Q3TW10_MOUSE;tr|Q3TVI2|Q3TVI2_MOUSE;tr|Q3TKF6|Q3TKF6_MOUSE;tr|Q3THQ0|Q3THQ0_MOUSE;sp|P29416|HEXA_MOUSE	tr|Q3TXV7|Q3TXV7_MOUSE Beta-hexosaminidase OS=Mus musculus GN=Hexa PE=2 SV=1;tr|Q8BNS6|Q8BNS6_MOUSE Beta-hexosaminidase OS=Mus musculus GN=Hexa PE=2 SV=1;tr|Q3UCP6|Q3UCP6_MOUSE Beta-hexosaminidase OS=Mus musculus GN=Hexa PE=2 SV=1;tr|Q3U936|Q3U936_MOUSE Be									21535000
tr|Q3TY66|Q3TY66_MOUSE;sp|P16014|SCG1_MOUSE;tr|Q8BP91|Q8BP91_MOUSE;tr|Q3UZU8|Q3UZU8_MOUSE;tr|Q3UZP2|Q3UZP2_MOUSE;tr|Q9CTW1|Q9CTW1_MOUSE	tr|Q3TY66|Q3TY66_MOUSE;sp|P16014|SCG1_MOUSE;tr|Q8BP91|Q8BP91_MOUSE;tr|Q3UZU8|Q3UZU8_MOUSE;tr|Q3UZP2|Q3UZP2_MOUSE	tr|Q3TY66|Q3TY66_MOUSE Chromogranin B OS=Mus musculus GN=Chgb PE=1 SV=1;sp|P16014|SCG1_MOUSE Secretogranin-1 OS=Mus musculus GN=Chgb PE=1 SV=2;tr|Q8BP91|Q8BP91_MOUSE Uncharacterized protein OS=Mus musculus GN=Chgb PE=2 SV=1;tr|Q3UZU8|Q3UZU8_MOUSE Uncharact	3442800000	6176600000	7044100000	8683400000	3357300000	5373100000	3930100000	4259500000	5965600000	3598500000	3701800000	4178000000
tr|Q3TYD5|Q3TYD5_MOUSE;sp|P70663|SPRL1_MOUSE;tr|Q3UYK7|Q3UYK7_MOUSE;tr|A0A0G2JFH7|A0A0G2JFH7_MOUSE	tr|Q3TYD5|Q3TYD5_MOUSE;sp|P70663|SPRL1_MOUSE;tr|Q3UYK7|Q3UYK7_MOUSE	tr|Q3TYD5|Q3TYD5_MOUSE Uncharacterized protein OS=Mus musculus GN=Sparcl1 PE=2 SV=1;sp|P70663|SPRL1_MOUSE SPARC-like protein 1 OS=Mus musculus GN=Sparcl1 PE=1 SV=3;tr|Q3UYK7|Q3UYK7_MOUSE Uncharacterized protein OS=Mus musculus GN=Sparcl1 PE=2 SV=1	6210750000	11133000000	9968600000	14228000000	3984200000	6961700000	5169000000	5323500000	8371700000	5332300000	3837300000	4556800000
tr|Q3TYE5|Q3TYE5_MOUSE;sp|Q8BLK3|LSAMP_MOUSE;tr|A0A087WP80|A0A087WP80_MOUSE;tr|A0A087WP70|A0A087WP70_MOUSE;tr|F6SB80|F6SB80_MOUSE;tr|A0A087WP06|A0A087WP06_MOUSE	tr|Q3TYE5|Q3TYE5_MOUSE;sp|Q8BLK3|LSAMP_MOUSE;tr|A0A087WP80|A0A087WP80_MOUSE	tr|Q3TYE5|Q3TYE5_MOUSE Limbic system-associated membrane protein OS=Mus musculus GN=Lsamp PE=1 SV=1;sp|Q8BLK3|LSAMP_MOUSE Limbic system-associated membrane protein OS=Mus musculus GN=Lsamp PE=1 SV=1;tr|A0A087WP80|A0A087WP80_MOUSE Limbic system-associated m	293650000	536150000	567320000	731020000	293990000	428620000	362000000	474240000	364380000	287060000	250830000	313830000
tr|Q3TYL9|Q3TYL9_MOUSE;tr|Q3TYV5|Q3TYV5_MOUSE;sp|P16330|CN37_MOUSE;tr|Q09J73|Q09J73_MOUSE	tr|Q3TYL9|Q3TYL9_MOUSE;tr|Q3TYV5|Q3TYV5_MOUSE;sp|P16330|CN37_MOUSE	tr|Q3TYL9|Q3TYL9_MOUSE 2,3-cyclic-nucleotide 3-phosphodiesterase OS=Mus musculus GN=Cnp PE=2 SV=1;tr|Q3TYV5|Q3TYV5_MOUSE 2,3-cyclic-nucleotide 3-phosphodiesterase OS=Mus musculus GN=Cnp PE=2 SV=1;sp|P16330|CN37_MOUSE 2,3-cyclic-nucleotide 3-phosph											260010000
tr|Q3U0A6|Q3U0A6_MOUSE;tr|B9EIX8|B9EIX8_MOUSE;tr|Q8BYM1|Q8BYM1_MOUSE	tr|Q3U0A6|Q3U0A6_MOUSE;tr|B9EIX8|B9EIX8_MOUSE;tr|Q8BYM1|Q8BYM1_MOUSE	tr|Q3U0A6|Q3U0A6_MOUSE Globin d1 OS=Mus musculus GN=Hbq1b PE=1 SV=1;tr|B9EIX8|B9EIX8_MOUSE MCG1039741 OS=Mus musculus GN=Hbq1b PE=2 SV=1;tr|Q8BYM1|Q8BYM1_MOUSE Globin d2 OS=Mus musculus GN=Hbq1a PE=2 SV=1										16883000
tr|Q3U0Z1|Q3U0Z1_MOUSE;sp|Q62507|COCH_MOUSE	tr|Q3U0Z1|Q3U0Z1_MOUSE;sp|Q62507|COCH_MOUSE	tr|Q3U0Z1|Q3U0Z1_MOUSE Uncharacterized protein OS=Mus musculus GN=Coch PE=2 SV=1;sp|Q62507|COCH_MOUSE Cochlin OS=Mus musculus GN=Coch PE=1 SV=2	310490000	176860000	243050000	332900000	143640000	178860000	232890000	225330000	186620000	142410000	373000000	301040000
tr|Q3U234|Q3U234_MOUSE;sp|P42703|LIFR_MOUSE	tr|Q3U234|Q3U234_MOUSE;sp|P42703|LIFR_MOUSE	tr|Q3U234|Q3U234_MOUSE Uncharacterized protein OS=Mus musculus GN=Lifr PE=2 SV=1;sp|P42703|LIFR_MOUSE Leukemia inhibitory factor receptor OS=Mus musculus GN=Lifr PE=1 SV=1										53927000	25825000
tr|Q3U292|Q3U292_MOUSE;tr|Q149Z9|Q149Z9_MOUSE;sp|P43277|H13_MOUSE	tr|Q3U292|Q3U292_MOUSE;tr|Q149Z9|Q149Z9_MOUSE;sp|P43277|H13_MOUSE	tr|Q3U292|Q3U292_MOUSE Uncharacterized protein OS=Mus musculus GN=Hist1h1d PE=2 SV=1;tr|Q149Z9|Q149Z9_MOUSE Histone cluster 1, H1d OS=Mus musculus GN=Hist1h1d PE=1 SV=1;sp|P43277|H13_MOUSE Histone H1.3 OS=Mus musculus GN=Hist1h1d PE=1 SV=2							10534000
tr|Q3U2X7|Q3U2X7_MOUSE;sp|Q64299|NOV_MOUSE	tr|Q3U2X7|Q3U2X7_MOUSE;sp|Q64299|NOV_MOUSE	tr|Q3U2X7|Q3U2X7_MOUSE Uncharacterized protein OS=Mus musculus GN=Nov PE=2 SV=1;sp|Q64299|NOV_MOUSE Protein NOV homolog OS=Mus musculus GN=Nov PE=1 SV=1		104850000	116430000	120630000	71990000	121160000	80061000	66477000	97050000		59359000	74669000
tr|Q3U344|Q3U344_MOUSE;sp|P84078|ARF1_MOUSE;sp|P61205|ARF3_MOUSE;sp|Q8BSL7|ARF2_MOUSE;tr|A2A6T9|A2A6T9_MOUSE;tr|Q9DD04|Q9DD04_MOUSE	tr|Q3U344|Q3U344_MOUSE;sp|P84078|ARF1_MOUSE;sp|P61205|ARF3_MOUSE;sp|Q8BSL7|ARF2_MOUSE	tr|Q3U344|Q3U344_MOUSE ADP-ribosylation factor 3 OS=Mus musculus GN=Arf3 PE=2 SV=1;sp|P84078|ARF1_MOUSE ADP-ribosylation factor 1 OS=Mus musculus GN=Arf1 PE=1 SV=2;sp|P61205|ARF3_MOUSE ADP-ribosylation factor 3 OS=Mus musculus GN=Arf3 PE=2 SV=2;sp|Q8BSL7|A					58747000	42064000	42259000
tr|Q3U379|Q3U379_MOUSE;sp|Q9QZF2|GPC1_MOUSE;tr|Q8CD04|Q8CD04_MOUSE;tr|Q3U3U3|Q3U3U3_MOUSE	tr|Q3U379|Q3U379_MOUSE;sp|Q9QZF2|GPC1_MOUSE	tr|Q3U379|Q3U379_MOUSE Glypican 1, isoform CRA_c OS=Mus musculus GN=Gpc1 PE=1 SV=1;sp|Q9QZF2|GPC1_MOUSE Glypican-1 OS=Mus musculus GN=Gpc1 PE=1 SV=1						21747000
tr|Q3U4N4|Q3U4N4_MOUSE;sp|O54724|CAVN1_MOUSE;tr|Q3TER0|Q3TER0_MOUSE	tr|Q3U4N4|Q3U4N4_MOUSE;sp|O54724|CAVN1_MOUSE	tr|Q3U4N4|Q3U4N4_MOUSE Uncharacterized protein OS=Mus musculus GN=Cavin1 PE=2 SV=1;sp|O54724|CAVN1_MOUSE Caveolae-associated protein 1 OS=Mus musculus GN=Cavin1 PE=1 SV=1					20482000
tr|Q3U4W8|Q3U4W8_MOUSE;sp|P56399|UBP5_MOUSE;tr|D3Z4K7|D3Z4K7_MOUSE	tr|Q3U4W8|Q3U4W8_MOUSE;sp|P56399|UBP5_MOUSE	tr|Q3U4W8|Q3U4W8_MOUSE Ubiquitinyl hydrolase 1 OS=Mus musculus GN=Usp5 PE=1 SV=1;sp|P56399|UBP5_MOUSE Ubiquitin carboxyl-terminal hydrolase 5 OS=Mus musculus GN=Usp5 PE=1 SV=1	6957800
tr|Q3U518|Q3U518_MOUSE;tr|Q3TWG2|Q3TWG2_MOUSE;sp|O08795|GLU2B_MOUSE	tr|Q3U518|Q3U518_MOUSE;tr|Q3TWG2|Q3TWG2_MOUSE;sp|O08795|GLU2B_MOUSE	tr|Q3U518|Q3U518_MOUSE Protein kinase C substrate 80K-H, isoform CRA_b OS=Mus musculus GN=Prkcsh PE=2 SV=1;tr|Q3TWG2|Q3TWG2_MOUSE Uncharacterized protein OS=Mus musculus GN=Prkcsh PE=2 SV=1;sp|O08795|GLU2B_MOUSE Glucosidase 2 subunit beta OS=Mus musculus G									6820100
tr|Q3U589|Q3U589_MOUSE;tr|Q60I30|Q60I30_MOUSE;sp|Q9D892|ITPA_MOUSE	tr|Q3U589|Q3U589_MOUSE;tr|Q60I30|Q60I30_MOUSE;sp|Q9D892|ITPA_MOUSE	tr|Q3U589|Q3U589_MOUSE Uncharacterized protein OS=Mus musculus GN=Itpa PE=2 SV=1;tr|Q60I30|Q60I30_MOUSE Inosine triphosphate pyrophosphatase OS=Mus musculus GN=Itpa PE=1 SV=1;sp|Q9D892|ITPA_MOUSE Inosine triphosphate pyrophosphatase OS=Mus musculus GN=Itpa	6558100
tr|Q3U5K7|Q3U5K7_MOUSE;sp|P21460|CYTC_MOUSE;tr|Q9EPX9|Q9EPX9_MOUSE;tr|A2APX3|A2APX3_MOUSE	tr|Q3U5K7|Q3U5K7_MOUSE;sp|P21460|CYTC_MOUSE;tr|Q9EPX9|Q9EPX9_MOUSE;tr|A2APX3|A2APX3_MOUSE	tr|Q3U5K7|Q3U5K7_MOUSE Cystatin (Fragment) OS=Mus musculus GN=Cst3 PE=2 SV=1;sp|P21460|CYTC_MOUSE Cystatin-C OS=Mus musculus GN=Cst3 PE=1 SV=2;tr|Q9EPX9|Q9EPX9_MOUSE Cystatin OS=Mus musculus GN=Cst3 PE=2 SV=1;tr|A2APX3|A2APX3_MOUSE Cystatin (Fragment) OS=M	13269500000	24244000000	25997000000	32152000000	12748000000	20325000000	17652000000	15958000000	26248000000	14236000000	16176000000	23706000000
tr|Q3U5U5|Q3U5U5_MOUSE;tr|Q3U4D1|Q3U4D1_MOUSE;tr|Q3TF14|Q3TF14_MOUSE;sp|P50247|SAHH_MOUSE;tr|Q8BPI7|Q8BPI7_MOUSE;tr|Q5M9P0|Q5M9P0_MOUSE;tr|A2ALT5|A2ALT5_MOUSE	tr|Q3U5U5|Q3U5U5_MOUSE;tr|Q3U4D1|Q3U4D1_MOUSE;tr|Q3TF14|Q3TF14_MOUSE;sp|P50247|SAHH_MOUSE;tr|Q8BPI7|Q8BPI7_MOUSE;tr|Q5M9P0|Q5M9P0_MOUSE	tr|Q3U5U5|Q3U5U5_MOUSE Adenosylhomocysteinase OS=Mus musculus PE=2 SV=1;tr|Q3U4D1|Q3U4D1_MOUSE Adenosylhomocysteinase OS=Mus musculus PE=2 SV=1;tr|Q3TF14|Q3TF14_MOUSE Adenosylhomocysteinase OS=Mus musculus GN=Ahcy PE=1 SV=1;sp|P50247|SAHH_MOUSE Adenosylhom	68859000				73120000	65873000	56765000	56179000	55831000	60354000	61028000	54614000
tr|Q3U5X7|Q3U5X7_MOUSE;tr|Q3TXN3|Q3TXN3_MOUSE;tr|Q3TBY6|Q3TBY6_MOUSE;sp|Q921V5|MGAT2_MOUSE	tr|Q3U5X7|Q3U5X7_MOUSE;tr|Q3TXN3|Q3TXN3_MOUSE;tr|Q3TBY6|Q3TBY6_MOUSE;sp|Q921V5|MGAT2_MOUSE	tr|Q3U5X7|Q3U5X7_MOUSE Uncharacterized protein OS=Mus musculus GN=Mgat2 PE=2 SV=1;tr|Q3TXN3|Q3TXN3_MOUSE Uncharacterized protein OS=Mus musculus GN=Mgat2 PE=2 SV=1;tr|Q3TBY6|Q3TBY6_MOUSE Uncharacterized protein OS=Mus musculus GN=Mgat2 PE=2 SV=1;sp|Q921V5|				10470000
tr|Q3U6E4|Q3U6E4_MOUSE;tr|Q0VGU2|Q0VGU2_MOUSE;sp|P26350|PTMA_MOUSE;tr|Q8CAQ5|Q8CAQ5_MOUSE;tr|Q8C2T3|Q8C2T3_MOUSE;tr|Q3U8X6|Q3U8X6_MOUSE;tr|Q3UA54|Q3UA54_MOUSE;tr|A0A087WP98|A0A087WP98_MOUSE;tr|A0A087WPN6|A0A087WPN6_MOUSE;tr|A0A087WQN2|A0A087WQN2_MOUSE	tr|Q3U6E4|Q3U6E4_MOUSE;tr|Q0VGU2|Q0VGU2_MOUSE;sp|P26350|PTMA_MOUSE;tr|Q8CAQ5|Q8CAQ5_MOUSE;tr|Q8C2T3|Q8C2T3_MOUSE;tr|Q3U8X6|Q3U8X6_MOUSE;tr|Q3UA54|Q3UA54_MOUSE	tr|Q3U6E4|Q3U6E4_MOUSE Uncharacterized protein OS=Mus musculus GN=Ptma PE=2 SV=1;tr|Q0VGU2|Q0VGU2_MOUSE Prothymosin alpha OS=Mus musculus GN=Ptma PE=1 SV=1;sp|P26350|PTMA_MOUSE Prothymosin alpha OS=Mus musculus GN=Ptma PE=1 SV=2;tr|Q8CAQ5|Q8CAQ5_MOUSE MCG1	71781000	110720000	99881000	71396000	172930000	106700000	159340000	97579000	143190000	77447000	68652000	84853000
tr|Q3U6G1|Q3U6G1_MOUSE;sp|Q923D2|BLVRB_MOUSE;tr|E9PZC3|E9PZC3_MOUSE;tr|E9PZC4|E9PZC4_MOUSE;tr|A0A0U1RPU7|A0A0U1RPU7_MOUSE;tr|Q3TP34|Q3TP34_MOUSE	tr|Q3U6G1|Q3U6G1_MOUSE;sp|Q923D2|BLVRB_MOUSE;tr|E9PZC3|E9PZC3_MOUSE;tr|E9PZC4|E9PZC4_MOUSE;tr|A0A0U1RPU7|A0A0U1RPU7_MOUSE	tr|Q3U6G1|Q3U6G1_MOUSE Biliverdin reductase B (Flavin reductase (NADPH)) OS=Mus musculus GN=Blvrb PE=1 SV=1;sp|Q923D2|BLVRB_MOUSE Flavin reductase (NADPH) OS=Mus musculus GN=Blvrb PE=1 SV=3;tr|E9PZC3|E9PZC3_MOUSE Flavin reductase (NADPH) OS=Mus musculus GN	1530650000	322160000	418270000	325070000	730960000	427690000	765190000	639380000	372150000	1417100000	578900000	1125700000
tr|Q3U6I5|Q3U6I5_MOUSE;sp|P14106|C1QB_MOUSE;tr|Q3US82|Q3US82_MOUSE	tr|Q3U6I5|Q3U6I5_MOUSE;sp|P14106|C1QB_MOUSE;tr|Q3US82|Q3US82_MOUSE	tr|Q3U6I5|Q3U6I5_MOUSE Uncharacterized protein OS=Mus musculus GN=C1qb PE=2 SV=1;sp|P14106|C1QB_MOUSE Complement C1q subcomponent subunit B OS=Mus musculus GN=C1qb PE=1 SV=2;tr|Q3US82|Q3US82_MOUSE Uncharacterized protein OS=Mus musculus GN=C1qb PE=2 SV=1									57901000
tr|Q3U6M5|Q3U6M5_MOUSE;sp|P34022|RANG_MOUSE;tr|H7BX22|H7BX22_MOUSE;tr|O08846|O08846_MOUSE	tr|Q3U6M5|Q3U6M5_MOUSE;sp|P34022|RANG_MOUSE;tr|H7BX22|H7BX22_MOUSE	tr|Q3U6M5|Q3U6M5_MOUSE Uncharacterized protein OS=Mus musculus GN=Ranbp1 PE=2 SV=1;sp|P34022|RANG_MOUSE Ran-specific GTPase-activating protein OS=Mus musculus GN=Ranbp1 PE=1 SV=2;tr|H7BX22|H7BX22_MOUSE Ran-specific GTPase-activating protein OS=Mus musculus	63344500				36955000	34715000	46663000	33083000			38730000	54211000
tr|Q3U7F3|Q3U7F3_MOUSE;tr|Q3TIK8|Q3TIK8_MOUSE;sp|P49312|ROA1_MOUSE;tr|Q5EBP8|Q5EBP8_MOUSE;tr|Q3UK83|Q3UK83_MOUSE;tr|B7ZWG9|B7ZWG9_MOUSE;tr|Q3TFB1|Q3TFB1_MOUSE	tr|Q3U7F3|Q3U7F3_MOUSE;tr|Q3TIK8|Q3TIK8_MOUSE;sp|P49312|ROA1_MOUSE;tr|Q5EBP8|Q5EBP8_MOUSE;tr|Q3UK83|Q3UK83_MOUSE;tr|B7ZWG9|B7ZWG9_MOUSE;tr|Q3TFB1|Q3TFB1_MOUSE	tr|Q3U7F3|Q3U7F3_MOUSE Uncharacterized protein OS=Mus musculus GN=Hnrnpa1 PE=2 SV=1;tr|Q3TIK8|Q3TIK8_MOUSE Uncharacterized protein OS=Mus musculus GN=Hnrnpa1 PE=2 SV=1;sp|P49312|ROA1_MOUSE Heterogeneous nuclear ribonucleoprotein A1 OS=Mus musculus GN=Hnrnp											4454800
tr|Q3U7Z6|Q3U7Z6_MOUSE;sp|Q9DBJ1|PGAM1_MOUSE;tr|Q6NWV5|Q6NWV5_MOUSE	tr|Q3U7Z6|Q3U7Z6_MOUSE;sp|Q9DBJ1|PGAM1_MOUSE;tr|Q6NWV5|Q6NWV5_MOUSE	tr|Q3U7Z6|Q3U7Z6_MOUSE Phosphoglycerate mutase OS=Mus musculus GN=Pgam1 PE=1 SV=1;sp|Q9DBJ1|PGAM1_MOUSE Phosphoglycerate mutase 1 OS=Mus musculus GN=Pgam1 PE=1 SV=3;tr|Q6NWV5|Q6NWV5_MOUSE Pgam1 protein (Fragment) OS=Mus musculus GN=Pgam1 PE=2 SV=1	97068000	81181000	53270000	49733000	156260000	112560000	118300000	98566000	97974000	133810000	159660000	102820000
tr|Q3U8F7|Q3U8F7_MOUSE;tr|Q3U3C2|Q3U3C2_MOUSE;sp|Q9Z0J0|NPC2_MOUSE;tr|Q3TXQ4|Q3TXQ4_MOUSE	tr|Q3U8F7|Q3U8F7_MOUSE;tr|Q3U3C2|Q3U3C2_MOUSE;sp|Q9Z0J0|NPC2_MOUSE;tr|Q3TXQ4|Q3TXQ4_MOUSE	tr|Q3U8F7|Q3U8F7_MOUSE Uncharacterized protein OS=Mus musculus GN=Npc2 PE=2 SV=1;tr|Q3U3C2|Q3U3C2_MOUSE Uncharacterized protein OS=Mus musculus GN=Npc2 PE=2 SV=1;sp|Q9Z0J0|NPC2_MOUSE Epididymal secretory protein E1 OS=Mus musculus GN=Npc2 PE=1 SV=1;tr|Q3TX	84339000	131110000	120260000	128710000	68781000	106680000	85230000	73927000	154270000	85220000	78013000	101150000
tr|Q3U935|Q3U935_MOUSE;tr|Q3U5V2|Q3U5V2_MOUSE;tr|A0A0N4SVS6|A0A0N4SVS6_MOUSE;tr|Q3ULK8|Q3ULK8_MOUSE;tr|Q5QJQ9|Q5QJQ9_MOUSE;sp|P53996|CNBP_MOUSE	tr|Q3U935|Q3U935_MOUSE;tr|Q3U5V2|Q3U5V2_MOUSE;tr|A0A0N4SVS6|A0A0N4SVS6_MOUSE;tr|Q3ULK8|Q3ULK8_MOUSE;tr|Q5QJQ9|Q5QJQ9_MOUSE;sp|P53996|CNBP_MOUSE	tr|Q3U935|Q3U935_MOUSE Uncharacterized protein OS=Mus musculus GN=Cnbp PE=2 SV=1;tr|Q3U5V2|Q3U5V2_MOUSE Uncharacterized protein OS=Mus musculus GN=Cnbp PE=2 SV=1;tr|A0A0N4SVS6|A0A0N4SVS6_MOUSE Cellular nucleic acid-binding protein OS=Mus musculus GN=Cnbp P						9437900
tr|Q3U967|Q3U967_MOUSE;tr|E5Q371|E5Q371_MOUSE;sp|Q61735|CD47_MOUSE	tr|Q3U967|Q3U967_MOUSE;tr|E5Q371|E5Q371_MOUSE;sp|Q61735|CD47_MOUSE	tr|Q3U967|Q3U967_MOUSE Uncharacterized protein OS=Mus musculus GN=Cd47 PE=2 SV=1;tr|E5Q371|E5Q371_MOUSE Integrin-associated protein OS=Mus musculus GN=Cd47 PE=2 SV=1;sp|Q61735|CD47_MOUSE Leukocyte surface antigen CD47 OS=Mus musculus GN=Cd47 PE=1 SV=2						2777900
tr|Q3U9A8|Q3U9A8_MOUSE;sp|Q9JJU8|SH3L1_MOUSE	tr|Q3U9A8|Q3U9A8_MOUSE;sp|Q9JJU8|SH3L1_MOUSE	tr|Q3U9A8|Q3U9A8_MOUSE SH3 domain-binding glutamic acid-rich-like protein OS=Mus musculus GN=Sh3bgrl PE=2 SV=1;sp|Q9JJU8|SH3L1_MOUSE SH3 domain-binding glutamic acid-rich-like protein OS=Mus musculus GN=Sh3bgrl PE=1 SV=1					20488000		21024000
tr|Q3U9M7|Q3U9M7_MOUSE;tr|Q3U6Z1|Q3U6Z1_MOUSE;tr|Q3U6N7|Q3U6N7_MOUSE;tr|Q3TJX0|Q3TJX0_MOUSE;sp|Q61233|PLSL_MOUSE;tr|D3YZ25|D3YZ25_MOUSE;tr|D3YVW8|D3YVW8_MOUSE;tr|D3Z7D9|D3Z7D9_MOUSE;tr|D3Z311|D3Z311_MOUSE;sp|Q3V0K9|PLSI_MOUSE	tr|Q3U9M7|Q3U9M7_MOUSE;tr|Q3U6Z1|Q3U6Z1_MOUSE;tr|Q3U6N7|Q3U6N7_MOUSE;tr|Q3TJX0|Q3TJX0_MOUSE;sp|Q61233|PLSL_MOUSE	tr|Q3U9M7|Q3U9M7_MOUSE Uncharacterized protein OS=Mus musculus GN=Lcp1 PE=2 SV=1;tr|Q3U6Z1|Q3U6Z1_MOUSE Uncharacterized protein OS=Mus musculus GN=Lcp1 PE=2 SV=1;tr|Q3U6N7|Q3U6N7_MOUSE Uncharacterized protein OS=Mus musculus GN=Lcp1 PE=2 SV=1;tr|Q3TJX0|Q3T					61747000
tr|Q3U9Q8|Q3U9Q8_MOUSE	tr|Q3U9Q8|Q3U9Q8_MOUSE	tr|Q3U9Q8|Q3U9Q8_MOUSE Uncharacterized protein OS=Mus musculus GN=Gsn PE=2 SV=1							25096000
tr|Q3UAS4|Q3UAS4_MOUSE;tr|Q3UE29|Q3UE29_MOUSE;tr|E9PZ00|E9PZ00_MOUSE;tr|Q3TXJ0|Q3TXJ0_MOUSE;tr|Q8BFQ1|Q8BFQ1_MOUSE;tr|Q3U8C4|Q3U8C4_MOUSE;tr|Q3U897|Q3U897_MOUSE;tr|Q3U825|Q3U825_MOUSE;tr|Q3U5W2|Q3U5W2_MOUSE;tr|Q3TXP9|Q3TXP9_MOUSE;tr|Q3TWL8|Q3TWL8_MOUSE;tr|Q3TWE9|Q3TWE9_MOUSE;tr|K3W4L3|K3W4L3_MOUSE;tr|B2RUD7|B2RUD7_MOUSE;tr|Q3UFE8|Q3UFE8_MOUSE;tr|J3QPG5|J3QPG5_MOUSE;sp|Q61207|SAP_MOUSE;tr|Q3TWM9|Q…	tr|Q3UAS4|Q3UAS4_MOUSE;tr|Q3UE29|Q3UE29_MOUSE;tr|E9PZ00|E9PZ00_MOUSE;tr|Q3TXJ0|Q3TXJ0_MOUSE;tr|Q8BFQ1|Q8BFQ1_MOUSE;tr|Q3U8C4|Q3U8C4_MOUSE;tr|Q3U897|Q3U897_MOUSE;tr|Q3U825|Q3U825_MOUSE;tr|Q3U5W2|Q3U5W2_MOUSE;tr|Q3TXP9|Q3TXP9_MOUSE;tr|Q3TWL8|Q3TWL8_MOUSE;tr|Q3TWE9|Q3TWE9_MOUSE;tr|K3W4L3|K3W4L3_MOUSE;tr|B2RUD7|B2RUD7_MOUSE;tr|Q3UFE8|Q3UFE8_MOUSE;tr|J3QPG5|J3QPG5_MOUSE;sp|Q61207|SAP_MOUSE;tr|Q3TWM9|Q…	tr|Q3UAS4|Q3UAS4_MOUSE Uncharacterized protein OS=Mus musculus GN=Psap PE=2 SV=1;tr|Q3UE29|Q3UE29_MOUSE Uncharacterized protein OS=Mus musculus GN=Psap PE=2 SV=1;tr|E9PZ00|E9PZ00_MOUSE Prosaposin OS=Mus musculus GN=Psap PE=1 SV=1;tr|Q3TXJ0|Q3TXJ0_MOUSE Unc	474480000	556410000	486490000	568400000	470520000	591620000	497490000	480290000	611760000	546810000	526300000	601560000
tr|Q3UB18|Q3UB18_MOUSE;tr|Q920X9|Q920X9_MOUSE;tr|Q920X8|Q920X8_MOUSE;tr|Q91VD3|Q91VD3_MOUSE;tr|Q91VC2|Q91VC2_MOUSE;tr|Q91V69|Q91V69_MOUSE;tr|Q4FJP7|Q4FJP7_MOUSE;tr|Q3U6A3|Q3U6A3_MOUSE;sp|P10810|CD14_MOUSE;tr|Q3TE16|Q3TE16_MOUSE;tr|Q920X7|Q920X7_MOUSE;tr|Q920X6|Q920X6_MUSSI;tr|Q3UE54|Q3UE54_MOUSE	tr|Q3UB18|Q3UB18_MOUSE;tr|Q920X9|Q920X9_MOUSE;tr|Q920X8|Q920X8_MOUSE;tr|Q91VD3|Q91VD3_MOUSE;tr|Q91VC2|Q91VC2_MOUSE;tr|Q91V69|Q91V69_MOUSE;tr|Q4FJP7|Q4FJP7_MOUSE;tr|Q3U6A3|Q3U6A3_MOUSE;sp|P10810|CD14_MOUSE;tr|Q3TE16|Q3TE16_MOUSE;tr|Q920X7|Q920X7_MOUSE;tr|Q920X6|Q920X6_MUSSI;tr|Q3UE54|Q3UE54_MOUSE	tr|Q3UB18|Q3UB18_MOUSE Uncharacterized protein (Fragment) OS=Mus musculus GN=Cd14 PE=2 SV=1;tr|Q920X9|Q920X9_MOUSE CD14 antigen (Fragment) OS=Mus musculus GN=CD14 PE=4 SV=1;tr|Q920X8|Q920X8_MOUSE CD14 antigen (Fragment) OS=Mus musculus GN=CD14 PE=4 SV=1;tr									10042000
tr|Q3UB60|Q3UB60_MOUSE;sp|Q9CR16|PPID_MOUSE	tr|Q3UB60|Q3UB60_MOUSE;sp|Q9CR16|PPID_MOUSE	tr|Q3UB60|Q3UB60_MOUSE Uncharacterized protein OS=Mus musculus GN=Ppid PE=2 SV=1;sp|Q9CR16|PPID_MOUSE Peptidyl-prolyl cis-trans isomerase D OS=Mus musculus GN=Ppid PE=1 SV=3	12347000
tr|Q3UB63|Q3UB63_MOUSE;tr|Q3U995|Q3U995_MOUSE;tr|Q3THU8|Q3THU8_MOUSE;sp|Q8VEM8|MPCP_MOUSE;tr|G5E902|G5E902_MOUSE	tr|Q3UB63|Q3UB63_MOUSE;tr|Q3U995|Q3U995_MOUSE;tr|Q3THU8|Q3THU8_MOUSE;sp|Q8VEM8|MPCP_MOUSE;tr|G5E902|G5E902_MOUSE	tr|Q3UB63|Q3UB63_MOUSE Uncharacterized protein OS=Mus musculus GN=Slc25a3 PE=2 SV=1;tr|Q3U995|Q3U995_MOUSE Uncharacterized protein OS=Mus musculus GN=Slc25a3 PE=2 SV=1;tr|Q3THU8|Q3THU8_MOUSE Uncharacterized protein OS=Mus musculus GN=Slc25a3 PE=2 SV=1;sp|Q						53788000	39399000
tr|Q3UB90|Q3UB90_MOUSE;tr|Q3UB67|Q3UB67_MOUSE;tr|Q3UB15|Q3UB15_MOUSE;tr|Q3T9U9|Q3T9U9_MOUSE;sp|P27659|RL3_MOUSE;tr|Q99N25|Q99N25_MOUSE;tr|Q9CQ09|Q9CQ09_MOUSE;tr|Q5U470|Q5U470_MOUSE;tr|Q3U9L3|Q3U9L3_MOUSE;tr|E9PWZ3|E9PWZ3_MOUSE	tr|Q3UB90|Q3UB90_MOUSE;tr|Q3UB67|Q3UB67_MOUSE;tr|Q3UB15|Q3UB15_MOUSE;tr|Q3T9U9|Q3T9U9_MOUSE;sp|P27659|RL3_MOUSE;tr|Q99N25|Q99N25_MOUSE;tr|Q9CQ09|Q9CQ09_MOUSE;tr|Q5U470|Q5U470_MOUSE;tr|Q3U9L3|Q3U9L3_MOUSE;tr|E9PWZ3|E9PWZ3_MOUSE	tr|Q3UB90|Q3UB90_MOUSE Uncharacterized protein OS=Mus musculus GN=Rpl3 PE=2 SV=1;tr|Q3UB67|Q3UB67_MOUSE Uncharacterized protein OS=Mus musculus GN=Rpl3 PE=2 SV=1;tr|Q3UB15|Q3UB15_MOUSE Uncharacterized protein OS=Mus musculus GN=Rpl3 PE=2 SV=1;tr|Q3T9U9|Q3T							15962000
tr|Q3UBA6|Q3UBA6_MOUSE;tr|Q3TZJ3|Q3TZJ3_MOUSE;tr|Q3TH56|Q3TH56_MOUSE;tr|Q3TEK2|Q3TEK2_MOUSE;sp|P63017|HSP7C_MOUSE;tr|Q504P4|Q504P4_MOUSE;tr|Q3U9L2|Q3U9L2_MOUSE;tr|Q3TQ13|Q3TQ13_MOUSE;tr|Q3UDS0|Q3UDS0_MOUSE;tr|Q3ULM1|Q3ULM1_MOUSE;tr|Q3TRH3|Q3TRH3_MOUSE;tr|Q3TF16|Q3TF16_MOUSE;tr|Q3TB63|Q3TB63_MOUSE;tr|Q3KQJ4|Q3KQJ4_MOUSE;tr|Q3TH04|Q3TH04_MOUSE;tr|Q3UXU1|Q3UXU1_MOUSE;tr|B7U582|B7U582_MOUSE;sp|P17156…	tr|Q3UBA6|Q3UBA6_MOUSE;tr|Q3TZJ3|Q3TZJ3_MOUSE;tr|Q3TH56|Q3TH56_MOUSE;tr|Q3TEK2|Q3TEK2_MOUSE;sp|P63017|HSP7C_MOUSE;tr|Q504P4|Q504P4_MOUSE;tr|Q3U9L2|Q3U9L2_MOUSE;tr|Q3TQ13|Q3TQ13_MOUSE;tr|Q3UDS0|Q3UDS0_MOUSE;tr|Q3ULM1|Q3ULM1_MOUSE;tr|Q3TRH3|Q3TRH3_MOUSE;tr|Q3TF16|Q3TF16_MOUSE;tr|Q3TB63|Q3TB63_MOUSE;tr|Q3KQJ4|Q3KQJ4_MOUSE;tr|Q3TH04|Q3TH04_MOUSE	tr|Q3UBA6|Q3UBA6_MOUSE Uncharacterized protein OS=Mus musculus GN=Hspa8 PE=2 SV=1;tr|Q3TZJ3|Q3TZJ3_MOUSE Uncharacterized protein OS=Mus musculus GN=Hspa8 PE=2 SV=1;tr|Q3TH56|Q3TH56_MOUSE Uncharacterized protein OS=Mus musculus GN=Hspa8 PE=2 SV=1;tr|Q3TEK2|	709555000	419970000	412350000	241250000	931590000	962790000	732760000	493340000	452800000	636790000	1079300000	597380000
tr|Q3UBP0|Q3UBP0_MOUSE;sp|P28650|PURA1_MOUSE;tr|J3QN31|J3QN31_MOUSE	tr|Q3UBP0|Q3UBP0_MOUSE;sp|P28650|PURA1_MOUSE;tr|J3QN31|J3QN31_MOUSE	tr|Q3UBP0|Q3UBP0_MOUSE Adenylosuccinate synthetase isozyme 1 OS=Mus musculus GN=Adssl1 PE=2 SV=1;sp|P28650|PURA1_MOUSE Adenylosuccinate synthetase isozyme 1 OS=Mus musculus GN=Adssl1 PE=1 SV=2;tr|J3QN31|J3QN31_MOUSE Adenylosuccinate synthetase isozyme 1 OS	507115000	281460000	259250000	111460000	339850000	281690000	332170000	184060000	134890000	152920000	419160000	246850000
tr|Q3UBR4|Q3UBR4_MOUSE;sp|O70370|CATS_MOUSE;tr|F6WR04|F6WR04_MOUSE;tr|Q8BSZ5|Q8BSZ5_MOUSE;tr|Q3UD32|Q3UD32_MOUSE;tr|Q99M14|Q99M14_MOUSE;tr|Q3U5K1|Q3U5K1_MOUSE	tr|Q3UBR4|Q3UBR4_MOUSE;sp|O70370|CATS_MOUSE;tr|F6WR04|F6WR04_MOUSE;tr|Q8BSZ5|Q8BSZ5_MOUSE;tr|Q3UD32|Q3UD32_MOUSE;tr|Q99M14|Q99M14_MOUSE;tr|Q3U5K1|Q3U5K1_MOUSE	tr|Q3UBR4|Q3UBR4_MOUSE Uncharacterized protein OS=Mus musculus GN=Ctss PE=2 SV=1;sp|O70370|CATS_MOUSE Cathepsin S OS=Mus musculus GN=Ctss PE=1 SV=2;tr|F6WR04|F6WR04_MOUSE Cathepsin S OS=Mus musculus GN=Ctss PE=1 SV=1;tr|Q8BSZ5|Q8BSZ5_MOUSE Cathepsin S OS=M	571325000	983920000	1149900000	1174800000	473390000	793110000	647630000	607050000	1141700000	973890000	854890000	996760000
tr|Q3UBS3|Q3UBS3_MOUSE;sp|Q61646|HPT_MOUSE	tr|Q3UBS3|Q3UBS3_MOUSE;sp|Q61646|HPT_MOUSE	tr|Q3UBS3|Q3UBS3_MOUSE Haptoglobin OS=Mus musculus GN=Hp PE=1 SV=1;sp|Q61646|HPT_MOUSE Haptoglobin OS=Mus musculus GN=Hp PE=1 SV=1	402140000	122090000	1951500000	390940000	3166200000	158120000	1004300000	2262500000
tr|Q3UBU9|Q3UBU9_MOUSE;sp|Q62446|FKBP3_MOUSE;tr|A0A1Y7VLK0|A0A1Y7VLK0_MOUSE;tr|A0A1Y7VP01|A0A1Y7VP01_MOUSE;tr|A0A1Y7VMJ9|A0A1Y7VMJ9_MOUSE;tr|A0A1Y7VJ86|A0A1Y7VJ86_MOUSE	tr|Q3UBU9|Q3UBU9_MOUSE;sp|Q62446|FKBP3_MOUSE;tr|A0A1Y7VLK0|A0A1Y7VLK0_MOUSE;tr|A0A1Y7VP01|A0A1Y7VP01_MOUSE	tr|Q3UBU9|Q3UBU9_MOUSE Peptidylprolyl isomerase OS=Mus musculus GN=Fkbp3 PE=1 SV=1;sp|Q62446|FKBP3_MOUSE Peptidyl-prolyl cis-trans isomerase FKBP3 OS=Mus musculus GN=Fkbp3 PE=1 SV=2;tr|A0A1Y7VLK0|A0A1Y7VLK0_MOUSE Peptidylprolyl isomerase OS=Mus musculus GN	9228700
tr|Q3UBX7|Q3UBX7_MOUSE;tr|Q3TXB1|Q3TXB1_MOUSE;sp|P98086|C1QA_MOUSE	tr|Q3UBX7|Q3UBX7_MOUSE;tr|Q3TXB1|Q3TXB1_MOUSE;sp|P98086|C1QA_MOUSE	tr|Q3UBX7|Q3UBX7_MOUSE Uncharacterized protein OS=Mus musculus GN=C1qa PE=2 SV=1;tr|Q3TXB1|Q3TXB1_MOUSE Uncharacterized protein OS=Mus musculus GN=C1qa PE=2 SV=1;sp|P98086|C1QA_MOUSE Complement C1q subcomponent subunit A OS=Mus musculus GN=C1qa PE=1 SV=2		49682000	56818000	58900000	23614000		27042000		31605000	35609000
tr|Q3UC73|Q3UC73_MOUSE;sp|P30412|PPIC_MOUSE	tr|Q3UC73|Q3UC73_MOUSE;sp|P30412|PPIC_MOUSE	tr|Q3UC73|Q3UC73_MOUSE Peptidyl-prolyl cis-trans isomerase OS=Mus musculus GN=Ppic PE=1 SV=1;sp|P30412|PPIC_MOUSE Peptidyl-prolyl cis-trans isomerase C OS=Mus musculus GN=Ppic PE=1 SV=1					10259000
tr|Q3UCD9|Q3UCD9_MOUSE;tr|Q3U7P0|Q3U7P0_MOUSE;tr|Q3TWR6|Q3TWR6_MOUSE;tr|Q3TWD0|Q3TWD0_MOUSE;sp|P18242|CATD_MOUSE;tr|Q8C243|Q8C243_MOUSE;tr|Q3U7I9|Q3U7I9_MOUSE;tr|F8WIR1|F8WIR1_MOUSE;tr|Q3U8W5|Q3U8W5_MOUSE;tr|Q3TJN3|Q3TJN3_MOUSE;tr|Q3TXL5|Q3TXL5_MOUSE;tr|Q3UCW4|Q3UCW4_MOUSE;tr|Q3UC89|Q3UC89_MOUSE;tr|Q3UAQ1|Q3UAQ1_MOUSE;tr|Q3U651|Q3U651_MOUSE;tr|Q3TIR0|Q3TIR0_MOUSE;tr|F6Y6L6|F6Y6L6_MOUSE;tr|Q3TWL1|…	tr|Q3UCD9|Q3UCD9_MOUSE;tr|Q3U7P0|Q3U7P0_MOUSE;tr|Q3TWR6|Q3TWR6_MOUSE;tr|Q3TWD0|Q3TWD0_MOUSE;sp|P18242|CATD_MOUSE;tr|Q8C243|Q8C243_MOUSE;tr|Q3U7I9|Q3U7I9_MOUSE;tr|F8WIR1|F8WIR1_MOUSE;tr|Q3U8W5|Q3U8W5_MOUSE;tr|Q3TJN3|Q3TJN3_MOUSE;tr|Q3TXL5|Q3TXL5_MOUSE;tr|Q3UCW4|Q3UCW4_MOUSE;tr|Q3UC89|Q3UC89_MOUSE;tr|Q3UAQ1|Q3UAQ1_MOUSE;tr|Q3U651|Q3U651_MOUSE;tr|Q3TIR0|Q3TIR0_MOUSE;tr|F6Y6L6|F6Y6L6_MOUSE;tr|Q3TWL1|…	tr|Q3UCD9|Q3UCD9_MOUSE Cathepsin D, isoform CRA_a OS=Mus musculus GN=Ctsd PE=1 SV=1;tr|Q3U7P0|Q3U7P0_MOUSE Uncharacterized protein OS=Mus musculus GN=Ctsd PE=2 SV=1;tr|Q3TWR6|Q3TWR6_MOUSE Uncharacterized protein OS=Mus musculus GN=Ctsd PE=2 SV=1;tr|Q3TWD0|	116840000	230070000	175250000	209860000	164060000	175840000	187220000	153540000	312870000	213620000	199450000	282250000
tr|Q3UDG0|Q3UDG0_MOUSE;tr|Q3TMT4|Q3TMT4_MOUSE;tr|Q3THE7|Q3THE7_MOUSE;tr|A7VL18|A7VL18_MOUSE;sp|Q9JLJ2|AL9A1_MOUSE;tr|Q3V1N7|Q3V1N7_MOUSE;tr|Q3U367|Q3U367_MOUSE;tr|Q3TG52|Q3TG52_MOUSE	tr|Q3UDG0|Q3UDG0_MOUSE;tr|Q3TMT4|Q3TMT4_MOUSE;tr|Q3THE7|Q3THE7_MOUSE;tr|A7VL18|A7VL18_MOUSE;sp|Q9JLJ2|AL9A1_MOUSE;tr|Q3V1N7|Q3V1N7_MOUSE;tr|Q3U367|Q3U367_MOUSE;tr|Q3TG52|Q3TG52_MOUSE	tr|Q3UDG0|Q3UDG0_MOUSE Uncharacterized protein OS=Mus musculus GN=Aldh9a1 PE=2 SV=1;tr|Q3TMT4|Q3TMT4_MOUSE Uncharacterized protein OS=Mus musculus GN=Aldh9a1 PE=2 SV=1;tr|Q3THE7|Q3THE7_MOUSE Uncharacterized protein OS=Mus musculus GN=Aldh9a1 PE=2 SV=1;tr|A						15203000
tr|Q3UDR2|Q3UDR2_MOUSE;tr|Q3URP6|Q3URP6_MOUSE;tr|Q3TWE3|Q3TWE3_MOUSE;tr|Q3TIM0|Q3TIM0_MOUSE;tr|Q3THC3|Q3THC3_MOUSE;tr|Q3TF72|Q3TF72_MOUSE;sp|P09103|PDIA1_MOUSE;tr|Q3UBY9|Q3UBY9_MOUSE;tr|Q3UJA8|Q3UJA8_MOUSE;tr|Q3UA23|Q3UA23_MOUSE;tr|Q3U738|Q3U738_MOUSE;tr|Q3TGS0|Q3TGS0_MOUSE;tr|Q3TT76|Q3TT76_MOUSE;tr|E9Q8G8|E9Q8G8_MOUSE;tr|Q3TIQ5|Q3TIQ5_MOUSE	tr|Q3UDR2|Q3UDR2_MOUSE;tr|Q3URP6|Q3URP6_MOUSE;tr|Q3TWE3|Q3TWE3_MOUSE;tr|Q3TIM0|Q3TIM0_MOUSE;tr|Q3THC3|Q3THC3_MOUSE;tr|Q3TF72|Q3TF72_MOUSE;sp|P09103|PDIA1_MOUSE;tr|Q3UBY9|Q3UBY9_MOUSE;tr|Q3UJA8|Q3UJA8_MOUSE;tr|Q3UA23|Q3UA23_MOUSE;tr|Q3U738|Q3U738_MOUSE;tr|Q3TGS0|Q3TGS0_MOUSE;tr|Q3TT76|Q3TT76_MOUSE	tr|Q3UDR2|Q3UDR2_MOUSE Protein disulfide-isomerase (Fragment) OS=Mus musculus GN=P4hb PE=2 SV=1;tr|Q3URP6|Q3URP6_MOUSE Protein disulfide-isomerase OS=Mus musculus GN=P4hb PE=2 SV=1;tr|Q3TWE3|Q3TWE3_MOUSE Protein disulfide-isomerase OS=Mus musculus GN=P4hb	60096500	20580000		20047000	181600000	97422000	133630000	58925000	39194000	33761000	54604000	36301000
tr|Q3UE51|Q3UE51_MOUSE;tr|G3UVV4|G3UVV4_MOUSE;tr|Q6GQU1|Q6GQU1_MOUSE;tr|Q3UPC4|Q3UPC4_MOUSE;tr|Q3TJE3|Q3TJE3_MOUSE;sp|P17710|HXK1_MOUSE;tr|Q3TTB4|Q3TTB4_MOUSE	tr|Q3UE51|Q3UE51_MOUSE;tr|G3UVV4|G3UVV4_MOUSE;tr|Q6GQU1|Q6GQU1_MOUSE;tr|Q3UPC4|Q3UPC4_MOUSE;tr|Q3TJE3|Q3TJE3_MOUSE;sp|P17710|HXK1_MOUSE;tr|Q3TTB4|Q3TTB4_MOUSE	tr|Q3UE51|Q3UE51_MOUSE Uncharacterized protein (Fragment) OS=Mus musculus GN=Hk1 PE=2 SV=1;tr|G3UVV4|G3UVV4_MOUSE Hexokinase 1, isoform CRA_f OS=Mus musculus GN=Hk1 PE=1 SV=1;tr|Q6GQU1|Q6GQU1_MOUSE Hexokinase 1, isoform CRA_d OS=Mus musculus GN=Hk1 PE=2 SV								5905400
tr|Q3UEA1|Q3UEA1_MOUSE;tr|Q3TED3|Q3TED3_MOUSE;sp|Q91V92|ACLY_MOUSE;tr|Q3V117|Q3V117_MOUSE;tr|Q3TS02|Q3TS02_MOUSE	tr|Q3UEA1|Q3UEA1_MOUSE;tr|Q3TED3|Q3TED3_MOUSE;sp|Q91V92|ACLY_MOUSE;tr|Q3V117|Q3V117_MOUSE;tr|Q3TS02|Q3TS02_MOUSE	tr|Q3UEA1|Q3UEA1_MOUSE Uncharacterized protein (Fragment) OS=Mus musculus GN=Acly PE=2 SV=1;tr|Q3TED3|Q3TED3_MOUSE ATP-citrate synthase OS=Mus musculus GN=Acly PE=2 SV=1;sp|Q91V92|ACLY_MOUSE ATP-citrate synthase OS=Mus musculus GN=Acly PE=1 SV=1;tr|Q3V117|
tr|Q3UEH4|Q3UEH4_MOUSE;tr|E9Q509|E9Q509_MOUSE;tr|Q3UEI4|Q3UEI4_MOUSE;tr|A7MCU9|A7MCU9_MOUSE;tr|G3X925|G3X925_MOUSE;sp|P53657|KPYR_MOUSE	tr|Q3UEH4|Q3UEH4_MOUSE;tr|E9Q509|E9Q509_MOUSE;tr|Q3UEI4|Q3UEI4_MOUSE;tr|A7MCU9|A7MCU9_MOUSE;tr|G3X925|G3X925_MOUSE;sp|P53657|KPYR_MOUSE	tr|Q3UEH4|Q3UEH4_MOUSE Pyruvate kinase OS=Mus musculus GN=Pklr PE=2 SV=1;tr|E9Q509|E9Q509_MOUSE Pyruvate kinase OS=Mus musculus GN=Pklr PE=1 SV=1;tr|Q3UEI4|Q3UEI4_MOUSE Pyruvate kinase (Fragment) OS=Mus musculus GN=Pklr PE=2 SV=1;tr|A7MCU9|A7MCU9_MOUSE Pyr										9770000
tr|Q3UEK9|Q3UEK9_MOUSE;tr|Q3UEK5|Q3UEK5_MOUSE;tr|Q3TIU3|Q3TIU3_MOUSE;sp|P29699|FETUA_MOUSE;tr|O35399|O35399_MOUSE;CON__P12763	tr|Q3UEK9|Q3UEK9_MOUSE;tr|Q3UEK5|Q3UEK5_MOUSE;tr|Q3TIU3|Q3TIU3_MOUSE;sp|P29699|FETUA_MOUSE	tr|Q3UEK9|Q3UEK9_MOUSE Alpha-2-HS-glycoprotein, isoform CRA_a OS=Mus musculus GN=Ahsg PE=1 SV=1;tr|Q3UEK5|Q3UEK5_MOUSE Uncharacterized protein OS=Mus musculus GN=Ahsg PE=2 SV=1;tr|Q3TIU3|Q3TIU3_MOUSE Uncharacterized protein OS=Mus musculus GN=Ahsg PE=2 SV=	6414200000	6685500000	4378600000	7443700000	5798900000	3551600000	8705700000	7890000000	6845300000	7166400000	6952500000	6367600000
tr|Q3UEL3|Q3UEL3_MOUSE;sp|Q61730|IL1AP_MOUSE;tr|E9Q6I2|E9Q6I2_MOUSE;tr|Q3V2X3|Q3V2X3_MOUSE;tr|G3UY13|G3UY13_MOUSE	tr|Q3UEL3|Q3UEL3_MOUSE;sp|Q61730|IL1AP_MOUSE;tr|E9Q6I2|E9Q6I2_MOUSE;tr|Q3V2X3|Q3V2X3_MOUSE;tr|G3UY13|G3UY13_MOUSE	tr|Q3UEL3|Q3UEL3_MOUSE Uncharacterized protein OS=Mus musculus GN=Il1rap PE=2 SV=1;sp|Q61730|IL1AP_MOUSE Interleukin-1 receptor accessory protein OS=Mus musculus GN=Il1rap PE=1 SV=1;tr|E9Q6I2|E9Q6I2_MOUSE Interleukin-1 receptor accessory protein OS=Mus mus	96032000	188950000	145960000	160770000	75230000	116230000	149330000	175150000	173090000	186440000	172410000	192670000
tr|Q3UEM7|Q3UEM7_MOUSE;sp|Q8VCM7|FIBG_MOUSE;tr|Q3UER8|Q3UER8_MOUSE	tr|Q3UEM7|Q3UEM7_MOUSE;sp|Q8VCM7|FIBG_MOUSE;tr|Q3UER8|Q3UER8_MOUSE	tr|Q3UEM7|Q3UEM7_MOUSE Uncharacterized protein OS=Mus musculus GN=Fgg PE=1 SV=1;sp|Q8VCM7|FIBG_MOUSE Fibrinogen gamma chain OS=Mus musculus GN=Fgg PE=1 SV=1;tr|Q3UER8|Q3UER8_MOUSE Fibrinogen gamma chain OS=Mus musculus GN=Fgg PE=1 SV=1	254140000	513920000	487350000	412730000	413900000	535640000	475530000	599970000	920490000	414550000	417320000	570090000
tr|Q3UF30|Q3UF30_MOUSE;tr|Q3TC45|Q3TC45_MOUSE;sp|P08207|S10AA_MOUSE	tr|Q3UF30|Q3UF30_MOUSE;tr|Q3TC45|Q3TC45_MOUSE;sp|P08207|S10AA_MOUSE	tr|Q3UF30|Q3UF30_MOUSE Uncharacterized protein OS=Mus musculus GN=S100a10 PE=2 SV=1;tr|Q3TC45|Q3TC45_MOUSE S100 calcium binding protein A10 (Calpactin), isoform CRA_a OS=Mus musculus GN=S100a10 PE=1 SV=1;sp|P08207|S10AA_MOUSE Protein S100-A10 OS=Mus muscul					72713000		56607000	40448000
tr|Q3UFI4|Q3UFI4_MOUSE;tr|Q3UCH0|Q3UCH0_MOUSE;sp|P47911|RL6_MOUSE	tr|Q3UFI4|Q3UFI4_MOUSE;tr|Q3UCH0|Q3UCH0_MOUSE;sp|P47911|RL6_MOUSE	tr|Q3UFI4|Q3UFI4_MOUSE 60S ribosomal protein L6 OS=Mus musculus GN=Rpl6 PE=2 SV=1;tr|Q3UCH0|Q3UCH0_MOUSE 60S ribosomal protein L6 OS=Mus musculus GN=Rpl6 PE=1 SV=1;sp|P47911|RL6_MOUSE 60S ribosomal protein L6 OS=Mus musculus GN=Rpl6 PE=1 SV=3					29087000	31152000
tr|Q3UFJ3|Q3UFJ3_MOUSE;sp|P35486|ODPA_MOUSE	tr|Q3UFJ3|Q3UFJ3_MOUSE;sp|P35486|ODPA_MOUSE	tr|Q3UFJ3|Q3UFJ3_MOUSE Pyruvate dehydrogenase E1 component subunit alpha OS=Mus musculus GN=Pdha1 PE=1 SV=1;sp|P35486|ODPA_MOUSE Pyruvate dehydrogenase E1 component subunit alpha, somatic form, mitochondrial OS=Mus musculus GN=Pdha1 PE=1 SV=1					38451000	47281000
tr|Q3UFS5|Q3UFS5_MOUSE;sp|P55065|PLTP_MOUSE;tr|A2A5K2|A2A5K2_MOUSE;tr|Q4FJT5|Q4FJT5_MOUSE;tr|Q3UE59|Q3UE59_MOUSE;tr|A2A5K3|A2A5K3_MOUSE;tr|A2A5K4|A2A5K4_MOUSE	tr|Q3UFS5|Q3UFS5_MOUSE;sp|P55065|PLTP_MOUSE;tr|A2A5K2|A2A5K2_MOUSE;tr|Q4FJT5|Q4FJT5_MOUSE;tr|Q3UE59|Q3UE59_MOUSE	tr|Q3UFS5|Q3UFS5_MOUSE Phospholipid transfer protein OS=Mus musculus GN=Pltp PE=1 SV=1;sp|P55065|PLTP_MOUSE Phospholipid transfer protein OS=Mus musculus GN=Pltp PE=1 SV=1;tr|A2A5K2|A2A5K2_MOUSE Phospholipid transfer protein OS=Mus musculus GN=Pltp PE=1 SV	183875000	255290000	208050000	408280000	149730000	261320000	178670000	190640000	173470000	151550000	95839000	147440000
tr|Q3UG07|Q3UG07_MOUSE;sp|P33434|MMP2_MOUSE;tr|Q6GXA5|Q6GXA5_MOUSE	tr|Q3UG07|Q3UG07_MOUSE;sp|P33434|MMP2_MOUSE	tr|Q3UG07|Q3UG07_MOUSE Matrix metallopeptidase 2 OS=Mus musculus GN=Mmp2 PE=2 SV=1;sp|P33434|MMP2_MOUSE 72 kDa type IV collagenase OS=Mus musculus GN=Mmp2 PE=1 SV=1	18052000	33618000		37303000			19446000
tr|Q3UH37|Q3UH37_MOUSE;tr|B9EIV5|B9EIV5_MOUSE;tr|F7BX42|F7BX42_MOUSE;tr|E9PZM8|E9PZM8_MOUSE;tr|Q3UH69|Q3UH69_MOUSE;tr|Q6TLW2|Q6TLW2_MOUSE;sp|Q99J85|NPTXR_MOUSE;tr|Q6PD36|Q6PD36_MOUSE;tr|H3BLN6|H3BLN6_MOUSE;tr|F8VQB8|F8VQB8_MOUSE;tr|Q6TLW1|Q6TLW1_MOUSE;tr|Q6TLW0|Q6TLW0_MOUSE;tr|Q6TKP2|Q6TKP2_MOUSE	tr|Q3UH37|Q3UH37_MOUSE;tr|B9EIV5|B9EIV5_MOUSE;tr|F7BX42|F7BX42_MOUSE;tr|E9PZM8|E9PZM8_MOUSE;tr|Q3UH69|Q3UH69_MOUSE;tr|Q6TLW2|Q6TLW2_MOUSE;sp|Q99J85|NPTXR_MOUSE;tr|Q6PD36|Q6PD36_MOUSE;tr|H3BLN6|H3BLN6_MOUSE;tr|F8VQB8|F8VQB8_MOUSE;tr|Q6TLW1|Q6TLW1_MOUSE;tr|Q6TLW0|Q6TLW0_MOUSE;tr|Q6TKP2|Q6TKP2_MOUSE	tr|Q3UH37|Q3UH37_MOUSE Uncharacterized protein OS=Mus musculus GN=Nptxr PE=2 SV=1;tr|B9EIV5|B9EIV5_MOUSE Neuronal pentraxin receptor OS=Mus musculus GN=Nptxr PE=2 SV=1;tr|F7BX42|F7BX42_MOUSE Neuronal pentraxin receptor OS=Mus musculus GN=Nptxr PE=1 SV=1;tr	161665000	305570000	351000000	345730000	193130000	345180000	255000000	277160000	385770000	249610000	222480000	331290000
tr|Q3UH39|Q3UH39_MOUSE;sp|Q61330|CNTN2_MOUSE;tr|Q3UGZ2|Q3UGZ2_MOUSE;tr|A0A087WQQ9|A0A087WQQ9_MOUSE;tr|Q3UY89|Q3UY89_MOUSE	tr|Q3UH39|Q3UH39_MOUSE;sp|Q61330|CNTN2_MOUSE;tr|Q3UGZ2|Q3UGZ2_MOUSE;tr|A0A087WQQ9|A0A087WQQ9_MOUSE	tr|Q3UH39|Q3UH39_MOUSE Uncharacterized protein OS=Mus musculus GN=Cntn2 PE=2 SV=1;sp|Q61330|CNTN2_MOUSE Contactin-2 OS=Mus musculus GN=Cntn2 PE=1 SV=2;tr|Q3UGZ2|Q3UGZ2_MOUSE Uncharacterized protein OS=Mus musculus GN=Cntn2 PE=2 SV=1;tr|A0A087WQQ9|A0A087WQQ	82508000	175670000	170120000	225530000	42649000	94520000	58723000	85663000	107860000	60599000	74303000	89332000
tr|Q3UHS6|Q3UHS6_MOUSE;sp|P26039|TLN1_MOUSE;tr|Q80TM2|Q80TM2_MOUSE;tr|Q3TBC3|Q3TBC3_MOUSE;tr|Q0V930|Q0V930_MOUSE;tr|F6SX70|F6SX70_MOUSE	tr|Q3UHS6|Q3UHS6_MOUSE;sp|P26039|TLN1_MOUSE;tr|Q80TM2|Q80TM2_MOUSE	tr|Q3UHS6|Q3UHS6_MOUSE Uncharacterized protein OS=Mus musculus GN=Tln1 PE=2 SV=1;sp|P26039|TLN1_MOUSE Talin-1 OS=Mus musculus GN=Tln1 PE=1 SV=2;tr|Q80TM2|Q80TM2_MOUSE MKIAA1027 protein (Fragment) OS=Mus musculus GN=Tln1 PE=2 SV=4	43323000				48027000
tr|Q3UHW9|Q3UHW9_MOUSE;sp|P45591|COF2_MOUSE;tr|A0A1Y7VJ71|A0A1Y7VJ71_MOUSE	tr|Q3UHW9|Q3UHW9_MOUSE;sp|P45591|COF2_MOUSE;tr|A0A1Y7VJ71|A0A1Y7VJ71_MOUSE	tr|Q3UHW9|Q3UHW9_MOUSE Uncharacterized protein OS=Mus musculus GN=Cfl2 PE=1 SV=1;sp|P45591|COF2_MOUSE Cofilin-2 OS=Mus musculus GN=Cfl2 PE=1 SV=1;tr|A0A1Y7VJ71|A0A1Y7VJ71_MOUSE Cofilin-2 OS=Mus musculus GN=Cfl2 PE=1 SV=1	384795000	204840000		125540000	288560000	204380000	316040000	173710000	91520000	220130000	393040000	311820000
tr|Q3UI56|Q3UI56_MOUSE;sp|P14824|ANXA6_MOUSE;tr|F8WIT2|F8WIT2_MOUSE;tr|Q3TUI1|Q3TUI1_MOUSE;tr|Q3UDK4|Q3UDK4_MOUSE;tr|Q99JX6|Q99JX6_MOUSE;tr|Q3V2Z4|Q3V2Z4_MOUSE;tr|Q8CEX0|Q8CEX0_MOUSE	tr|Q3UI56|Q3UI56_MOUSE;sp|P14824|ANXA6_MOUSE;tr|F8WIT2|F8WIT2_MOUSE;tr|Q3TUI1|Q3TUI1_MOUSE;tr|Q3UDK4|Q3UDK4_MOUSE;tr|Q99JX6|Q99JX6_MOUSE;tr|Q3V2Z4|Q3V2Z4_MOUSE;tr|Q8CEX0|Q8CEX0_MOUSE	tr|Q3UI56|Q3UI56_MOUSE Annexin OS=Mus musculus GN=Anxa6 PE=2 SV=1;sp|P14824|ANXA6_MOUSE Annexin A6 OS=Mus musculus GN=Anxa6 PE=1 SV=3;tr|F8WIT2|F8WIT2_MOUSE Annexin OS=Mus musculus GN=Anxa6 PE=1 SV=1;tr|Q3TUI1|Q3TUI1_MOUSE Annexin OS=Mus musculus GN=Anxa6	204990000	297110000	120220000	74869000	696080000	614140000	317560000	201460000	80010000	31946000	115430000	65134000
tr|Q3UIP2|Q3UIP2_MOUSE;sp|Q61398|PCOC1_MOUSE;tr|Q3UN82|Q3UN82_MOUSE;tr|D3YUE2|D3YUE2_MOUSE;tr|Q3TX39|Q3TX39_MOUSE;tr|A0A0G2JE29|A0A0G2JE29_MOUSE;tr|D3YZE3|D3YZE3_MOUSE;tr|D3YWH0|D3YWH0_MOUSE	tr|Q3UIP2|Q3UIP2_MOUSE;sp|Q61398|PCOC1_MOUSE;tr|Q3UN82|Q3UN82_MOUSE;tr|D3YUE2|D3YUE2_MOUSE;tr|Q3TX39|Q3TX39_MOUSE;tr|A0A0G2JE29|A0A0G2JE29_MOUSE;tr|D3YZE3|D3YZE3_MOUSE	tr|Q3UIP2|Q3UIP2_MOUSE Procollagen C-endopeptidase enhancer protein OS=Mus musculus GN=Pcolce PE=1 SV=1;sp|Q61398|PCOC1_MOUSE Procollagen C-endopeptidase enhancer 1 OS=Mus musculus GN=Pcolce PE=1 SV=2;tr|Q3UN82|Q3UN82_MOUSE Uncharacterized protein OS=Mus m	274570000	479400000	377370000	498230000	362570000	454110000	413580000	391820000	388450000	246200000	197110000	274380000
tr|Q3UJK6|Q3UJK6_MOUSE;tr|A0A140LHL5|A0A140LHL5_MOUSE;sp|Q8VDQ8|SIR2_MOUSE	tr|Q3UJK6|Q3UJK6_MOUSE;tr|A0A140LHL5|A0A140LHL5_MOUSE;sp|Q8VDQ8|SIR2_MOUSE	tr|Q3UJK6|Q3UJK6_MOUSE Uncharacterized protein OS=Mus musculus GN=Sirt2 PE=2 SV=1;tr|A0A140LHL5|A0A140LHL5_MOUSE NAD-dependent protein deacetylase sirtuin-2 OS=Mus musculus GN=Sirt2 PE=1 SV=1;sp|Q8VDQ8|SIR2_MOUSE NAD-dependent protein deacetylase sirtuin-2											6757500
tr|Q3UJS0|Q3UJS0_MOUSE;sp|P62918|RL8_MOUSE;tr|Q9Z237|Q9Z237_MOUSE;tr|Q3THC7|Q3THC7_MOUSE	tr|Q3UJS0|Q3UJS0_MOUSE;sp|P62918|RL8_MOUSE;tr|Q9Z237|Q9Z237_MOUSE;tr|Q3THC7|Q3THC7_MOUSE	tr|Q3UJS0|Q3UJS0_MOUSE Uncharacterized protein OS=Mus musculus GN=Rpl8 PE=2 SV=1;sp|P62918|RL8_MOUSE 60S ribosomal protein L8 OS=Mus musculus GN=Rpl8 PE=1 SV=2;tr|Q9Z237|Q9Z237_MOUSE Ribosomal protein L8 (Fragment) OS=Mus musculus PE=4 SV=1;tr|Q3THC7|Q3THC					7141200
tr|Q3UJU6|Q3UJU6_MOUSE;tr|Q9CQW4|Q9CQW4_MOUSE;tr|Q3UA25|Q3UA25_MOUSE;tr|Q5M9L9|Q5M9L9_MOUSE;tr|Q497E9|Q497E9_MOUSE;sp|P62242|RS8_MOUSE	tr|Q3UJU6|Q3UJU6_MOUSE;tr|Q9CQW4|Q9CQW4_MOUSE;tr|Q3UA25|Q3UA25_MOUSE;tr|Q5M9L9|Q5M9L9_MOUSE;tr|Q497E9|Q497E9_MOUSE;sp|P62242|RS8_MOUSE	tr|Q3UJU6|Q3UJU6_MOUSE 40S ribosomal protein S8 (Fragment) OS=Mus musculus GN=Rps8 PE=2 SV=1;tr|Q9CQW4|Q9CQW4_MOUSE 40S ribosomal protein S8 (Fragment) OS=Mus musculus GN=Rps8 PE=2 SV=1;tr|Q3UA25|Q3UA25_MOUSE 40S ribosomal protein S8 (Fragment) OS=Mus musc					25815000
tr|Q3UK61|Q3UK61_MOUSE;tr|Q3U9P7|Q3U9P7_MOUSE;sp|Q9D0K2|SCOT1_MOUSE;tr|Q3UJQ9|Q3UJQ9_MOUSE;tr|A1E285|A1E285_MOUSE;tr|Q9CRF4|Q9CRF4_MOUSE	tr|Q3UK61|Q3UK61_MOUSE;tr|Q3U9P7|Q3U9P7_MOUSE;sp|Q9D0K2|SCOT1_MOUSE;tr|Q3UJQ9|Q3UJQ9_MOUSE	tr|Q3UK61|Q3UK61_MOUSE Succinyl-CoA:3-ketoacid-coenzyme A transferase OS=Mus musculus GN=Oxct1 PE=2 SV=1;tr|Q3U9P7|Q3U9P7_MOUSE Succinyl-CoA:3-ketoacid-coenzyme A transferase OS=Mus musculus GN=Oxct1 PE=2 SV=1;sp|Q9D0K2|SCOT1_MOUSE Succinyl-CoA:3-ketoacid					24871000
tr|Q3UKR1|Q3UKR1_MOUSE;sp|P28654|PGS2_MOUSE;tr|Q3TSV1|Q3TSV1_MOUSE;tr|Q6LAK9|Q6LAK9_MOUSE;tr|O55073|O55073_MOUSE	tr|Q3UKR1|Q3UKR1_MOUSE;sp|P28654|PGS2_MOUSE;tr|Q3TSV1|Q3TSV1_MOUSE	tr|Q3UKR1|Q3UKR1_MOUSE Decorin OS=Mus musculus GN=Dcn PE=1 SV=1;sp|P28654|PGS2_MOUSE Decorin OS=Mus musculus GN=Dcn PE=1 SV=1;tr|Q3TSV1|Q3TSV1_MOUSE Decorin OS=Mus musculus GN=Dcn PE=2 SV=1	352410000	326130000	330700000	310680000	1258200000	838310000	1083300000	514740000	531070000	272570000	417830000	259530000
tr|Q3UKT3|Q3UKT3_MOUSE;tr|Q3UJK5|Q3UJK5_MOUSE;tr|Q3TG75|Q3TG75_MOUSE;sp|P29758|OAT_MOUSE	tr|Q3UKT3|Q3UKT3_MOUSE;tr|Q3UJK5|Q3UJK5_MOUSE;tr|Q3TG75|Q3TG75_MOUSE;sp|P29758|OAT_MOUSE	tr|Q3UKT3|Q3UKT3_MOUSE Uncharacterized protein OS=Mus musculus GN=Oat PE=2 SV=1;tr|Q3UJK5|Q3UJK5_MOUSE Uncharacterized protein OS=Mus musculus GN=Oat PE=2 SV=1;tr|Q3TG75|Q3TG75_MOUSE Ornithine aminotransferase, isoform CRA_b OS=Mus musculus GN=Oat PE=1 SV=							21078000				19770000
tr|Q3UKU5|Q3UKU5_MOUSE	tr|Q3UKU5|Q3UKU5_MOUSE	tr|Q3UKU5|Q3UKU5_MOUSE Uncharacterized protein OS=Mus musculus GN=Lifr PE=2 SV=1											6691900
tr|Q3ULF7|Q3ULF7_MOUSE;tr|Q3TWJ4|Q3TWJ4_MOUSE;tr|Q3TGW0|Q3TGW0_MOUSE;sp|Q99JY9|ARP3_MOUSE;tr|Q3TGE1|Q3TGE1_MOUSE;tr|A0A087WRA1|A0A087WRA1_MOUSE;tr|Q3UGH0|Q3UGH0_MOUSE;tr|A0A087WQ14|A0A087WQ14_MOUSE;tr|A0A087WS98|A0A087WS98_MOUSE;tr|A0A087WP86|A0A087WP86_MOUSE;tr|A0A087WPR6|A0A087WPR6_MOUSE;tr|A0A087WQ83|A0A087WQ83_MOUSE;tr|Q9ERF8|Q9ERF8_MOUSE;sp|Q641P0|ARP3B_MOUSE	tr|Q3ULF7|Q3ULF7_MOUSE;tr|Q3TWJ4|Q3TWJ4_MOUSE;tr|Q3TGW0|Q3TGW0_MOUSE;sp|Q99JY9|ARP3_MOUSE;tr|Q3TGE1|Q3TGE1_MOUSE;tr|A0A087WRA1|A0A087WRA1_MOUSE;tr|Q3UGH0|Q3UGH0_MOUSE;tr|A0A087WQ14|A0A087WQ14_MOUSE	tr|Q3ULF7|Q3ULF7_MOUSE MCG1196 OS=Mus musculus GN=Actr3 PE=1 SV=1;tr|Q3TWJ4|Q3TWJ4_MOUSE Uncharacterized protein OS=Mus musculus GN=Actr3 PE=2 SV=1;tr|Q3TGW0|Q3TGW0_MOUSE Uncharacterized protein OS=Mus musculus GN=Actr3 PE=2 SV=1;sp|Q99JY9|ARP3_MOUSE Actin					38136000
tr|Q3ULN5|Q3ULN5_MOUSE;sp|P26883|FKB1A_MOUSE;tr|Q1JUQ7|Q1JUQ7_MOUSE;tr|Q1JUQ8|Q1JUQ8_MOUSE;tr|Q1JUQ6|Q1JUQ6_MOUSE;tr|Q3UBA0|Q3UBA0_MOUSE;tr|Q3UKJ3|Q3UKJ3_MOUSE;tr|F6X9I3|F6X9I3_MOUSE	tr|Q3ULN5|Q3ULN5_MOUSE;sp|P26883|FKB1A_MOUSE;tr|Q1JUQ7|Q1JUQ7_MOUSE;tr|Q1JUQ8|Q1JUQ8_MOUSE;tr|Q1JUQ6|Q1JUQ6_MOUSE;tr|Q3UBA0|Q3UBA0_MOUSE;tr|Q3UKJ3|Q3UKJ3_MOUSE;tr|F6X9I3|F6X9I3_MOUSE	tr|Q3ULN5|Q3ULN5_MOUSE Peptidylprolyl isomerase OS=Mus musculus GN=Fkbp1a PE=2 SV=1;sp|P26883|FKB1A_MOUSE Peptidyl-prolyl cis-trans isomerase FKBP1A OS=Mus musculus GN=Fkbp1a PE=1 SV=2;tr|Q1JUQ7|Q1JUQ7_MOUSE FK506 binding protein12-T2 OS=Mus musculus GN=Fk	37173500				59533000	41140000	50765000				37324000	42526000
tr|Q3ULT2|Q3ULT2_MOUSE;tr|Q3UDJ7|Q3UDJ7_MOUSE;sp|P57780|ACTN4_MOUSE;tr|A0A1L1SV25|A0A1L1SV25_MOUSE;tr|Q1A602|Q1A602_MOUSE;tr|E9Q2W9|E9Q2W9_MOUSE;tr|A0A1L1SVJ6|A0A1L1SVJ6_MOUSE;tr|D3Z0L8|D3Z0L8_MOUSE	tr|Q3ULT2|Q3ULT2_MOUSE;tr|Q3UDJ7|Q3UDJ7_MOUSE;sp|P57780|ACTN4_MOUSE;tr|A0A1L1SV25|A0A1L1SV25_MOUSE;tr|Q1A602|Q1A602_MOUSE;tr|E9Q2W9|E9Q2W9_MOUSE	tr|Q3ULT2|Q3ULT2_MOUSE Actinin alpha 4 OS=Mus musculus GN=Actn4 PE=1 SV=1;tr|Q3UDJ7|Q3UDJ7_MOUSE Uncharacterized protein OS=Mus musculus GN=Actn4 PE=2 SV=1;sp|P57780|ACTN4_MOUSE Alpha-actinin-4 OS=Mus musculus GN=Actn4 PE=1 SV=1;tr|A0A1L1SV25|A0A1L1SV25_MO					90334000
tr|Q3ULW0|Q3ULW0_MOUSE;sp|P62827|RAN_MOUSE;tr|Q14AA6|Q14AA6_MOUSE;tr|A6H622|A6H622_MOUSE;sp|Q61820|RANT_MOUSE	tr|Q3ULW0|Q3ULW0_MOUSE;sp|P62827|RAN_MOUSE;tr|Q14AA6|Q14AA6_MOUSE;tr|A6H622|A6H622_MOUSE;sp|Q61820|RANT_MOUSE	tr|Q3ULW0|Q3ULW0_MOUSE GTP-binding nuclear protein Ran OS=Mus musculus GN=Ran PE=2 SV=1;sp|P62827|RAN_MOUSE GTP-binding nuclear protein Ran OS=Mus musculus GN=Ran PE=1 SV=3;tr|Q14AA6|Q14AA6_MOUSE GTP-binding nuclear protein Ran OS=Mus musculus GN=1700009N1	298390000	68906000			222100000	142510000	181250000	170950000		328400000	168640000	251900000
tr|Q3UM23|Q3UM23_MOUSE;sp|Q91VI7|RINI_MOUSE;tr|A0A1B0GSG5|A0A1B0GSG5_MOUSE;tr|A0A1B0GRG4|A0A1B0GRG4_MOUSE;tr|A0A1B0GRY7|A0A1B0GRY7_MOUSE	tr|Q3UM23|Q3UM23_MOUSE;sp|Q91VI7|RINI_MOUSE;tr|A0A1B0GSG5|A0A1B0GSG5_MOUSE	tr|Q3UM23|Q3UM23_MOUSE Uncharacterized protein OS=Mus musculus GN=Rnh1 PE=2 SV=1;sp|Q91VI7|RINI_MOUSE Ribonuclease inhibitor OS=Mus musculus GN=Rnh1 PE=1 SV=1;tr|A0A1B0GSG5|A0A1B0GSG5_MOUSE Ribonuclease inhibitor OS=Mus musculus GN=Rnh1 PE=1 SV=1	41591000	38216000			40408000	45369000	43352000	33306000				35372000
tr|Q3UPK6|Q3UPK6_MOUSE;tr|Q3TUX3|Q3TUX3_MOUSE;tr|Q3TUI9|Q3TUI9_MOUSE;sp|Q9Z2U1|PSA5_MOUSE	tr|Q3UPK6|Q3UPK6_MOUSE;tr|Q3TUX3|Q3TUX3_MOUSE;tr|Q3TUI9|Q3TUI9_MOUSE;sp|Q9Z2U1|PSA5_MOUSE	tr|Q3UPK6|Q3UPK6_MOUSE Proteasome subunit alpha type OS=Mus musculus GN=Psma5 PE=1 SV=1;tr|Q3TUX3|Q3TUX3_MOUSE Proteasome subunit alpha type OS=Mus musculus GN=Psma5 PE=2 SV=1;tr|Q3TUI9|Q3TUI9_MOUSE Proteasome subunit alpha type OS=Mus musculus GN=Psma5 PE	33391000				30578000							32504000
tr|Q3UPV2|Q3UPV2_MOUSE;sp|Q9EPU5|TNR21_MOUSE;tr|Q8BZU6|Q8BZU6_MOUSE	tr|Q3UPV2|Q3UPV2_MOUSE;sp|Q9EPU5|TNR21_MOUSE;tr|Q8BZU6|Q8BZU6_MOUSE	tr|Q3UPV2|Q3UPV2_MOUSE Uncharacterized protein OS=Mus musculus GN=Tnfrsf21 PE=2 SV=1;sp|Q9EPU5|TNR21_MOUSE Tumor necrosis factor receptor superfamily member 21 OS=Mus musculus GN=Tnfrsf21 PE=1 SV=2;tr|Q8BZU6|Q8BZU6_MOUSE Uncharacterized protein OS=Mus musc			44009000	51567000
tr|Q3UQS9|Q3UQS9_MOUSE;tr|Q14BI5|Q14BI5_MOUSE;tr|O55124|O55124_MOUSE	tr|Q3UQS9|Q3UQS9_MOUSE;tr|Q14BI5|Q14BI5_MOUSE;tr|O55124|O55124_MOUSE	tr|Q3UQS9|Q3UQS9_MOUSE Uncharacterized protein OS=Mus musculus GN=Myom2 PE=2 SV=1;tr|Q14BI5|Q14BI5_MOUSE Myomesin 2 OS=Mus musculus GN=Myom2 PE=1 SV=1;tr|O55124|O55124_MOUSE M-protein OS=Mus musculus GN=Myom2 PE=2 SV=1											5570200
tr|Q3UQV0|Q3UQV0_MOUSE;sp|Q07079|IBP5_MOUSE;tr|Q3TT49|Q3TT49_MOUSE	tr|Q3UQV0|Q3UQV0_MOUSE;sp|Q07079|IBP5_MOUSE	tr|Q3UQV0|Q3UQV0_MOUSE Insulin-like growth factor binding protein 5, isoform CRA_a OS=Mus musculus GN=Igfbp5 PE=1 SV=1;sp|Q07079|IBP5_MOUSE Insulin-like growth factor-binding protein 5 OS=Mus musculus GN=Igfbp5 PE=1 SV=1	49584000		63825000	85040000		67242000	50790000	51606000	75759000
tr|Q3USP9|Q3USP9_MOUSE;sp|P28184|MT3_MOUSE	tr|Q3USP9|Q3USP9_MOUSE;sp|P28184|MT3_MOUSE	tr|Q3USP9|Q3USP9_MOUSE Metallothionein OS=Mus musculus GN=Mt3 PE=1 SV=1;sp|P28184|MT3_MOUSE Metallothionein-3 OS=Mus musculus GN=Mt3 PE=1 SV=1		36351000		56663000	98131000	87243000	65887000	55459000	57960000	52139000	60424000	54871000
tr|Q3UST4|Q3UST4_MOUSE;tr|A2ACL9|A2ACL9_MOUSE;sp|Q62443|NPTX1_MOUSE	tr|Q3UST4|Q3UST4_MOUSE;tr|A2ACL9|A2ACL9_MOUSE;sp|Q62443|NPTX1_MOUSE	tr|Q3UST4|Q3UST4_MOUSE Uncharacterized protein (Fragment) OS=Mus musculus GN=Nptx1 PE=2 SV=1;tr|A2ACL9|A2ACL9_MOUSE Neuronal pentraxin 1 OS=Mus musculus GN=Nptx1 PE=1 SV=1;sp|Q62443|NPTX1_MOUSE Neuronal pentraxin-1 OS=Mus musculus GN=Nptx1 PE=1 SV=1	139645000	313400000	288250000	289600000	166430000	235730000	170400000	222760000	235640000	151930000	154010000	196590000
tr|Q3UTR7|Q3UTR7_MOUSE;sp|P11859|ANGT_MOUSE;tr|Q8VCN0|Q8VCN0_MOUSE	tr|Q3UTR7|Q3UTR7_MOUSE;sp|P11859|ANGT_MOUSE;tr|Q8VCN0|Q8VCN0_MOUSE	tr|Q3UTR7|Q3UTR7_MOUSE Angiotensinogen OS=Mus musculus GN=Agt PE=1 SV=1;sp|P11859|ANGT_MOUSE Angiotensinogen OS=Mus musculus GN=Agt PE=1 SV=1;tr|Q8VCN0|Q8VCN0_MOUSE Agt protein OS=Mus musculus GN=Agt PE=2 SV=1	1966450000	2711800000	3041000000	3173900000	1430200000	1786900000	1484900000	2016300000	2142300000	1951700000	1730700000	1798800000
tr|Q3UUY3|Q3UUY3_MOUSE;tr|B1AQ89|B1AQ89_MOUSE	tr|Q3UUY3|Q3UUY3_MOUSE	tr|Q3UUY3|Q3UUY3_MOUSE Keratin-associated protein 4-1 OS=Mus musculus GN=Krtap4-1 PE=2 SV=1
tr|Q3UV95|Q3UV95_MOUSE;tr|Q3TYT5|Q3TYT5_MOUSE;tr|Q6NXZ8|Q6NXZ8_MOUSE;tr|Q3TYY6|Q3TYY6_MOUSE;tr|Q3T9M7|Q3T9M7_MOUSE;sp|P49222|EPB42_MOUSE	tr|Q3UV95|Q3UV95_MOUSE;tr|Q3TYT5|Q3TYT5_MOUSE;tr|Q6NXZ8|Q6NXZ8_MOUSE;tr|Q3TYY6|Q3TYY6_MOUSE;tr|Q3T9M7|Q3T9M7_MOUSE;sp|P49222|EPB42_MOUSE	tr|Q3UV95|Q3UV95_MOUSE Erythrocyte membrane protein band 4.2 OS=Mus musculus GN=Epb42 PE=1 SV=1;tr|Q3TYT5|Q3TYT5_MOUSE Uncharacterized protein OS=Mus musculus GN=Epb42 PE=2 SV=1;tr|Q6NXZ8|Q6NXZ8_MOUSE Erythrocyte protein band 4.2 OS=Mus musculus GN=Epb42 P												53400000
tr|Q3UW96|Q3UW96_MOUSE;sp|Q99MP3|CALCB_MOUSE;tr|S4R2N3|S4R2N3_MOUSE	tr|Q3UW96|Q3UW96_MOUSE;sp|Q99MP3|CALCB_MOUSE;tr|S4R2N3|S4R2N3_MOUSE	tr|Q3UW96|Q3UW96_MOUSE Calcitonin gene-related peptide 2 OS=Mus musculus GN=Calcb PE=2 SV=1;sp|Q99MP3|CALCB_MOUSE Calcitonin gene-related peptide 2 OS=Mus musculus GN=Calcb PE=2 SV=1;tr|S4R2N3|S4R2N3_MOUSE Calcitonin gene-related peptide 2 OS=Mus musculus						4558900
tr|Q3UVB1|Q3UVB1_MOUSE;sp|P04247|MYG_MOUSE;sp|P04249|MYG_PROGU	tr|Q3UVB1|Q3UVB1_MOUSE;sp|P04247|MYG_MOUSE	tr|Q3UVB1|Q3UVB1_MOUSE Myoglobin OS=Mus musculus GN=Mb PE=1 SV=1;sp|P04247|MYG_MOUSE Myoglobin OS=Mus musculus GN=Mb PE=1 SV=3	19522000000	11143000000	8787200000	7794300000	16421000000	11857000000	16778000000	8119400000	9522900000	6582900000	17199000000	15779000000
tr|Q3UVJ2|Q3UVJ2_MOUSE;tr|Q3U0U5|Q3U0U5_MOUSE;sp|P40124|CAP1_MOUSE;tr|Q3UNQ0|Q3UNQ0_MOUSE;tr|Q3TC53|Q3TC53_MOUSE;tr|B1ARS0|B1ARS0_MOUSE	tr|Q3UVJ2|Q3UVJ2_MOUSE;tr|Q3U0U5|Q3U0U5_MOUSE;sp|P40124|CAP1_MOUSE;tr|Q3UNQ0|Q3UNQ0_MOUSE;tr|Q3TC53|Q3TC53_MOUSE	tr|Q3UVJ2|Q3UVJ2_MOUSE Adenylyl cyclase-associated protein OS=Mus musculus GN=Cap1 PE=2 SV=1;tr|Q3U0U5|Q3U0U5_MOUSE Adenylyl cyclase-associated protein OS=Mus musculus GN=Cap1 PE=2 SV=1;sp|P40124|CAP1_MOUSE Adenylyl cyclase-associated protein 1 OS=Mus musc	20272000
tr|Q3UVN0|Q3UVN0_MOUSE;tr|Q3U837|Q3U837_MOUSE;tr|Q3T9L0|Q3T9L0_MOUSE;sp|Q8VDW0|DX39A_MOUSE;sp|Q9Z1N5|DX39B_MOUSE;tr|A0A1S6GWH2|A0A1S6GWH2_MOUSE;tr|D6RHT5|D6RHT5_MOUSE;tr|Q3UAF1|Q3UAF1_MOUSE;tr|Q3TB18|Q3TB18_MOUSE;tr|Q3TPL7|Q3TPL7_MOUSE;tr|Q3TIE4|Q3TIE4_MOUSE	tr|Q3UVN0|Q3UVN0_MOUSE;tr|Q3U837|Q3U837_MOUSE;tr|Q3T9L0|Q3T9L0_MOUSE;sp|Q8VDW0|DX39A_MOUSE;sp|Q9Z1N5|DX39B_MOUSE;tr|A0A1S6GWH2|A0A1S6GWH2_MOUSE;tr|D6RHT5|D6RHT5_MOUSE;tr|Q3UAF1|Q3UAF1_MOUSE;tr|Q3TB18|Q3TB18_MOUSE;tr|Q3TPL7|Q3TPL7_MOUSE;tr|Q3TIE4|Q3TIE4_MOUSE	tr|Q3UVN0|Q3UVN0_MOUSE Uncharacterized protein OS=Mus musculus GN=Ddx39 PE=2 SV=1;tr|Q3U837|Q3U837_MOUSE Uncharacterized protein OS=Mus musculus GN=Ddx39 PE=2 SV=1;tr|Q3T9L0|Q3T9L0_MOUSE Uncharacterized protein OS=Mus musculus GN=Ddx39 PE=2 SV=1;sp|Q8VDW0|					12733000
tr|Q3UWP8|Q3UWP8_MOUSE;tr|B2MWM9|B2MWM9_MOUSE;sp|P14211|CALR_MOUSE	tr|Q3UWP8|Q3UWP8_MOUSE;tr|B2MWM9|B2MWM9_MOUSE;sp|P14211|CALR_MOUSE	tr|Q3UWP8|Q3UWP8_MOUSE Uncharacterized protein (Fragment) OS=Mus musculus GN=Calr PE=2 SV=1;tr|B2MWM9|B2MWM9_MOUSE Calreticulin OS=Mus musculus GN=Calr PE=1 SV=1;sp|P14211|CALR_MOUSE Calreticulin OS=Mus musculus GN=Calr PE=1 SV=1	146175000	200720000	190120000	142210000	301220000	235060000	246140000	171820000	239840000	178120000	199270000	155050000
tr|Q3UWS9|Q3UWS9_MOUSE;tr|Q3U7H9|Q3U7H9_MOUSE;sp|P99029|PRDX5_MOUSE;tr|G3UZJ4|G3UZJ4_MOUSE;tr|H3BJQ7|H3BJQ7_MOUSE;tr|Q9JHL8|Q9JHL8_MOUSE;tr|Q9D6X2|Q9D6X2_MOUSE;tr|Q91YU9|Q91YU9_MOUSE	tr|Q3UWS9|Q3UWS9_MOUSE;tr|Q3U7H9|Q3U7H9_MOUSE;sp|P99029|PRDX5_MOUSE;tr|G3UZJ4|G3UZJ4_MOUSE;tr|H3BJQ7|H3BJQ7_MOUSE;tr|Q9JHL8|Q9JHL8_MOUSE;tr|Q9D6X2|Q9D6X2_MOUSE	tr|Q3UWS9|Q3UWS9_MOUSE Uncharacterized protein (Fragment) OS=Mus musculus GN=Prdx5 PE=2 SV=1;tr|Q3U7H9|Q3U7H9_MOUSE Uncharacterized protein (Fragment) OS=Mus musculus GN=Prdx5 PE=2 SV=1;sp|P99029|PRDX5_MOUSE Peroxiredoxin-5, mitochondrial OS=Mus musculus G	99491000	89251000	37044000	61289000	126660000	163460000	108820000	75297000	59832000	42264000	113630000	69622000
tr|Q3UVV3|Q3UVV3_MOUSE;sp|Q63912|OMGP_MOUSE;tr|G3XA53|G3XA53_MOUSE;tr|Q8CAB4|Q8CAB4_MOUSE	tr|Q3UVV3|Q3UVV3_MOUSE;sp|Q63912|OMGP_MOUSE;tr|G3XA53|G3XA53_MOUSE	tr|Q3UVV3|Q3UVV3_MOUSE Uncharacterized protein OS=Mus musculus GN=Omg PE=2 SV=1;sp|Q63912|OMGP_MOUSE Oligodendrocyte-myelin glycoprotein OS=Mus musculus GN=Omg PE=1 SV=1;tr|G3XA53|G3XA53_MOUSE Oligodendrocyte-myelin glycoprotein OS=Mus musculus GN=Omg PE=1	87324000	69411000	98970000	106360000	51090000	71360000		57702000			52451000
tr|Q3UWX1|Q3UWX1_MOUSE;tr|A0A0R4J1Y7|A0A0R4J1Y7_MOUSE;tr|E9PXX7|E9PXX7_MOUSE;tr|Q3UBW8|Q3UBW8_MOUSE;tr|Q3TEE8|Q3TEE8_MOUSE;sp|Q91W90|TXND5_MOUSE	tr|Q3UWX1|Q3UWX1_MOUSE;tr|A0A0R4J1Y7|A0A0R4J1Y7_MOUSE;tr|E9PXX7|E9PXX7_MOUSE;tr|Q3UBW8|Q3UBW8_MOUSE;tr|Q3TEE8|Q3TEE8_MOUSE;sp|Q91W90|TXND5_MOUSE	tr|Q3UWX1|Q3UWX1_MOUSE Uncharacterized protein (Fragment) OS=Mus musculus GN=Txndc5 PE=2 SV=1;tr|A0A0R4J1Y7|A0A0R4J1Y7_MOUSE Thioredoxin domain-containing protein 5 OS=Mus musculus GN=Txndc5 PE=1 SV=1;tr|E9PXX7|E9PXX7_MOUSE Thioredoxin domain-containing pr					22676000
tr|Q3UXJ2|Q3UXJ2_MOUSE;tr|A1L354|A1L354_MOUSE;tr|A1L353|A1L353_MOUSE;sp|P82198|BGH3_MOUSE;tr|Q3TDZ5|Q3TDZ5_MOUSE;tr|Q3TAY9|Q3TAY9_MOUSE;tr|Q3UBG4|Q3UBG4_MOUSE;tr|Q19PV3|Q19PV3_MOUSE	tr|Q3UXJ2|Q3UXJ2_MOUSE;tr|A1L354|A1L354_MOUSE;tr|A1L353|A1L353_MOUSE;sp|P82198|BGH3_MOUSE;tr|Q3TDZ5|Q3TDZ5_MOUSE;tr|Q3TAY9|Q3TAY9_MOUSE;tr|Q3UBG4|Q3UBG4_MOUSE	tr|Q3UXJ2|Q3UXJ2_MOUSE Transforming growth factor-beta-induced protein ig-h3 OS=Mus musculus GN=Tgfbi PE=2 SV=1;tr|A1L354|A1L354_MOUSE Transforming growth factor, beta induced OS=Mus musculus GN=Tgfbi PE=2 SV=1;tr|A1L353|A1L353_MOUSE Transforming growth fa		49565000	50848000	61807000	62622000	35668000	35699000	31093000	33481000
tr|Q3UY00|Q3UY00_MOUSE;sp|P50114|S100B_MOUSE	tr|Q3UY00|Q3UY00_MOUSE;sp|P50114|S100B_MOUSE	tr|Q3UY00|Q3UY00_MOUSE Protein S100 OS=Mus musculus GN=S100b PE=1 SV=1;sp|P50114|S100B_MOUSE Protein S100-B OS=Mus musculus GN=S100b PE=1 SV=2		13575000		13686000	52654000		28839000	31260000	12707000	77185000	72890000	49505000
tr|Q3UYI4|Q3UYI4_MOUSE;tr|Q3UY31|Q3UY31_MOUSE;sp|P56388|CART_MOUSE	tr|Q3UYI4|Q3UYI4_MOUSE;tr|Q3UY31|Q3UY31_MOUSE;sp|P56388|CART_MOUSE	tr|Q3UYI4|Q3UYI4_MOUSE Uncharacterized protein OS=Mus musculus GN=Cartpt PE=2 SV=1;tr|Q3UY31|Q3UY31_MOUSE Uncharacterized protein OS=Mus musculus GN=Cartpt PE=2 SV=1;sp|P56388|CART_MOUSE Cocaine- and amphetamine-regulated transcript protein OS=Mus musculus		117580000	129320000	123940000					138330000	89712000		110360000
tr|Q3UYM8|Q3UYM8_MOUSE;sp|P60202|MYPR_MOUSE;tr|Q62079|Q62079_MOUSE	tr|Q3UYM8|Q3UYM8_MOUSE;sp|P60202|MYPR_MOUSE;tr|Q62079|Q62079_MOUSE	tr|Q3UYM8|Q3UYM8_MOUSE Uncharacterized protein OS=Mus musculus GN=Plp1 PE=2 SV=1;sp|P60202|MYPR_MOUSE Myelin proteolipid protein OS=Mus musculus GN=Plp1 PE=1 SV=2;tr|Q62079|Q62079_MOUSE Myelin proteolipid OS=Mus musculus GN=Plp1 PE=2 SV=1										31255000	2686800000	43613000
tr|Q3UZW2|Q3UZW2_MOUSE;tr|O35852|O35852_MOUSE;sp|O35417|PDYN_MOUSE	tr|Q3UZW2|Q3UZW2_MOUSE;tr|O35852|O35852_MOUSE;sp|O35417|PDYN_MOUSE	tr|Q3UZW2|Q3UZW2_MOUSE Uncharacterized protein OS=Mus musculus GN=Pdyn PE=2 SV=1;tr|O35852|O35852_MOUSE Preprodynorphin (Fragment) OS=Mus musculus GN=Pdyn PE=1 SV=1;sp|O35417|PDYN_MOUSE Proenkephalin-B OS=Mus musculus GN=Pdyn PE=2 SV=1							19317000
tr|Q3V1T9|Q3V1T9_MOUSE;sp|P20918|PLMN_MOUSE;tr|Q6TCI0|Q6TCI0_MOUSE;CON__P06868	tr|Q3V1T9|Q3V1T9_MOUSE;sp|P20918|PLMN_MOUSE;tr|Q6TCI0|Q6TCI0_MOUSE	tr|Q3V1T9|Q3V1T9_MOUSE Plasminogen OS=Mus musculus GN=Plg PE=2 SV=1;sp|P20918|PLMN_MOUSE Plasminogen OS=Mus musculus GN=Plg PE=1 SV=3;tr|Q6TCI0|Q6TCI0_MOUSE Angiostatin OS=Mus musculus GN=Plg PE=2 SV=1	2288850000	3669100000	2934200000	3272300000	1861200000	1751300000	2337500000	3192600000	3507000000	3709000000	3023300000	3594600000
tr|Q3V1W9|Q3V1W9_MOUSE;sp|Q03137|EPHA4_MOUSE;tr|Q99KA8|Q99KA8_MOUSE;tr|A0A087WQW6|A0A087WQW6_MOUSE	tr|Q3V1W9|Q3V1W9_MOUSE;sp|Q03137|EPHA4_MOUSE;tr|Q99KA8|Q99KA8_MOUSE	tr|Q3V1W9|Q3V1W9_MOUSE Uncharacterized protein OS=Mus musculus GN=Epha4 PE=2 SV=1;sp|Q03137|EPHA4_MOUSE Ephrin type-A receptor 4 OS=Mus musculus GN=Epha4 PE=1 SV=2;tr|Q99KA8|Q99KA8_MOUSE Epha4 protein OS=Mus musculus GN=Epha4 PE=2 SV=1		32907000	25663000	35445000	18984000	30394000	21418000		26743000			21562000
tr|Q3V235|Q3V235_MOUSE;sp|O35129|PHB2_MOUSE;tr|F6QPR1|F6QPR1_MOUSE;tr|Q3V2V2|Q3V2V2_MOUSE	tr|Q3V235|Q3V235_MOUSE;sp|O35129|PHB2_MOUSE;tr|F6QPR1|F6QPR1_MOUSE;tr|Q3V2V2|Q3V2V2_MOUSE	tr|Q3V235|Q3V235_MOUSE Prohibitin 2 OS=Mus musculus GN=Phb2 PE=1 SV=1;sp|O35129|PHB2_MOUSE Prohibitin-2 OS=Mus musculus GN=Phb2 PE=1 SV=1;tr|F6QPR1|F6QPR1_MOUSE Prohibitin-2 (Fragment) OS=Mus musculus GN=Phb2 PE=1 SV=1;tr|Q3V2V2|Q3V2V2_MOUSE Uncharacterize						16118000
tr|Q3V2C6|Q3V2C6_MOUSE;tr|Q3V1K9|Q3V1K9_MOUSE;sp|P31001|DESM_MOUSE;tr|Q9JJY2|Q9JJY2_MOUSE	tr|Q3V2C6|Q3V2C6_MOUSE;tr|Q3V1K9|Q3V1K9_MOUSE;sp|P31001|DESM_MOUSE	tr|Q3V2C6|Q3V2C6_MOUSE Uncharacterized protein OS=Mus musculus GN=Des PE=2 SV=1;tr|Q3V1K9|Q3V1K9_MOUSE Uncharacterized protein OS=Mus musculus GN=Des PE=1 SV=1;sp|P31001|DESM_MOUSE Desmin OS=Mus musculus GN=Des PE=1 SV=3						43695000					32314000
tr|Q3V2G1|Q3V2G1_MOUSE;sp|Q00623|APOA1_MOUSE;tr|Q58EV2|Q58EV2_MOUSE;tr|A0A1L1STX7|A0A1L1STX7_MOUSE;CON__P15497	tr|Q3V2G1|Q3V2G1_MOUSE;sp|Q00623|APOA1_MOUSE;tr|Q58EV2|Q58EV2_MOUSE	tr|Q3V2G1|Q3V2G1_MOUSE Uncharacterized protein OS=Mus musculus GN=Apoa1 PE=2 SV=1;sp|Q00623|APOA1_MOUSE Apolipoprotein A-I OS=Mus musculus GN=Apoa1 PE=1 SV=2;tr|Q58EV2|Q58EV2_MOUSE Apoa1 protein OS=Mus musculus GN=Apoa1 PE=2 SV=1	9564850000	12460000000	7223700000	6533400000	7738300000	14641000000	12940000000	20314000000	15536000000	33012000000	24186000000	24576000000
tr|Q3V3U0|Q3V3U0_MOUSE;tr|Q3UYH9|Q3UYH9_MOUSE;tr|Q3UGT5|Q3UGT5_MOUSE;tr|Q3TFQ8|Q3TFQ8_MOUSE;sp|Q8CI94|PYGB_MOUSE;tr|Q3UZL2|Q3UZL2_MOUSE	tr|Q3V3U0|Q3V3U0_MOUSE;tr|Q3UYH9|Q3UYH9_MOUSE;tr|Q3UGT5|Q3UGT5_MOUSE;tr|Q3TFQ8|Q3TFQ8_MOUSE;sp|Q8CI94|PYGB_MOUSE	tr|Q3V3U0|Q3V3U0_MOUSE Alpha-1,4 glucan phosphorylase OS=Mus musculus GN=Pygb PE=2 SV=1;tr|Q3UYH9|Q3UYH9_MOUSE Alpha-1,4 glucan phosphorylase OS=Mus musculus GN=Pygb PE=2 SV=1;tr|Q3UGT5|Q3UGT5_MOUSE Alpha-1,4 glucan phosphorylase OS=Mus musculus GN=Pygb PE									44043000
tr|Q3V3W7|Q3V3W7_MOUSE;sp|Q8BH61|F13A_MOUSE;tr|Q3TQH1|Q3TQH1_MOUSE;tr|Q3TDG1|Q3TDG1_MOUSE;tr|Q3TC79|Q3TC79_MOUSE;tr|Q9DBT1|Q9DBT1_MOUSE;tr|Q3TBF3|Q3TBF3_MOUSE	tr|Q3V3W7|Q3V3W7_MOUSE;sp|Q8BH61|F13A_MOUSE;tr|Q3TQH1|Q3TQH1_MOUSE	tr|Q3V3W7|Q3V3W7_MOUSE Uncharacterized protein OS=Mus musculus GN=F13a1 PE=2 SV=1;sp|Q8BH61|F13A_MOUSE Coagulation factor XIII A chain OS=Mus musculus GN=F13a1 PE=1 SV=3;tr|Q3TQH1|Q3TQH1_MOUSE Uncharacterized protein OS=Mus musculus GN=F13a1 PE=2 SV=1		32586000			67300000	53319000	29238000		24394000		25149000	27554000
tr|Q3V4B7|Q3V4B7_MOUSE	tr|Q3V4B7|Q3V4B7_MOUSE	tr|Q3V4B7|Q3V4B7_MOUSE Keratin-associated protein 4-6 OS=Mus musculus GN=Krtap4-6 PE=1 SV=1					87371000
tr|Q496W1|Q496W1_MOUSE;sp|P62818|S10A3_MOUSE;tr|D3YUT9|D3YUT9_MOUSE	tr|Q496W1|Q496W1_MOUSE;sp|P62818|S10A3_MOUSE	tr|Q496W1|Q496W1_MOUSE S100 calcium binding protein A3 OS=Mus musculus GN=S100a3 PE=2 SV=1;sp|P62818|S10A3_MOUSE Protein S100-A3 OS=Mus musculus GN=S100a3 PE=2 SV=1					304150000
tr|Q497D7|Q497D7_MOUSE;tr|Q5PR15|Q5PR15_MOUSE;tr|Q58DZ3|Q58DZ3_MOUSE;sp|P62889|RL30_MOUSE	tr|Q497D7|Q497D7_MOUSE;tr|Q5PR15|Q5PR15_MOUSE;tr|Q58DZ3|Q58DZ3_MOUSE;sp|P62889|RL30_MOUSE	tr|Q497D7|Q497D7_MOUSE Rpl30 protein OS=Mus musculus GN=Rpl30 PE=2 SV=1;tr|Q5PR15|Q5PR15_MOUSE Rpl30 protein OS=Mus musculus GN=Rpl30 PE=2 SV=1;tr|Q58DZ3|Q58DZ3_MOUSE MCG20799 OS=Mus musculus GN=Rpl30 PE=1 SV=1;sp|P62889|RL30_MOUSE 60S ribosomal protein L3						14863000
tr|Q497I3|Q497I3_MOUSE;sp|Q05816|FABP5_MOUSE;tr|Q3TLH6|Q3TLH6_MOUSE	tr|Q497I3|Q497I3_MOUSE;sp|Q05816|FABP5_MOUSE;tr|Q3TLH6|Q3TLH6_MOUSE	tr|Q497I3|Q497I3_MOUSE Fatty acid binding protein 5, epidermal OS=Mus musculus GN=Fabp5 PE=1 SV=1;sp|Q05816|FABP5_MOUSE Fatty acid-binding protein, epidermal OS=Mus musculus GN=Fabp5 PE=1 SV=3;tr|Q3TLH6|Q3TLH6_MOUSE Uncharacterized protein OS=Mus musculus					51242000
tr|Q4FJK0|Q4FJK0_MOUSE;sp|Q9CQ62|DECR_MOUSE	tr|Q4FJK0|Q4FJK0_MOUSE;sp|Q9CQ62|DECR_MOUSE	tr|Q4FJK0|Q4FJK0_MOUSE Decr1 protein OS=Mus musculus GN=Decr1 PE=1 SV=1;sp|Q9CQ62|DECR_MOUSE 2,4-dienoyl-CoA reductase, mitochondrial OS=Mus musculus GN=Decr1 PE=1 SV=1					30831000	30828000	17650000
tr|Q4FJL0|Q4FJL0_MOUSE;tr|Q3U621|Q3U621_MOUSE;sp|P61027|RAB10_MOUSE;tr|Q91YW0|Q91YW0_MOUSE;tr|Q8BKQ0|Q8BKQ0_MOUSE;tr|Q0PD42|Q0PD42_MOUSE;sp|Q9DD03|RAB13_MOUSE;tr|Q0PD50|Q0PD50_MOUSE;tr|Q0PD49|Q0PD49_MOUSE;sp|P61028|RAB8B_MOUSE;sp|P55258|RAB8A_MOUSE;tr|Q3UHW5|Q3UHW5_MOUSE;tr|Q3TYH2|Q3TYH2_MOUSE;tr|Q3TYB1|Q3TYB1_MOUSE;tr|Q0PD40|Q0PD40_MOUSE;sp|Q8K386|RAB15_MOUSE	tr|Q4FJL0|Q4FJL0_MOUSE;tr|Q3U621|Q3U621_MOUSE;sp|P61027|RAB10_MOUSE;tr|Q91YW0|Q91YW0_MOUSE;tr|Q8BKQ0|Q8BKQ0_MOUSE;tr|Q0PD42|Q0PD42_MOUSE;sp|Q9DD03|RAB13_MOUSE;tr|Q0PD50|Q0PD50_MOUSE;tr|Q0PD49|Q0PD49_MOUSE;sp|P61028|RAB8B_MOUSE;sp|P55258|RAB8A_MOUSE;tr|Q3UHW5|Q3UHW5_MOUSE;tr|Q3TYH2|Q3TYH2_MOUSE;tr|Q3TYB1|Q3TYB1_MOUSE;tr|Q0PD40|Q0PD40_MOUSE;sp|Q8K386|RAB15_MOUSE	tr|Q4FJL0|Q4FJL0_MOUSE RAB10, member RAS oncogene family OS=Mus musculus GN=Rab10 PE=1 SV=1;tr|Q3U621|Q3U621_MOUSE Uncharacterized protein OS=Mus musculus GN=Rab10 PE=2 SV=1;sp|P61027|RAB10_MOUSE Ras-related protein Rab-10 OS=Mus musculus GN=Rab10 PE=1 SV=					4170100
tr|Q4FJQ0|Q4FJQ0_MOUSE;sp|P51150|RAB7A_MOUSE;tr|A0A0N4SVR6|A0A0N4SVR6_MOUSE;tr|A0A0N4SVG9|A0A0N4SVG9_MOUSE	tr|Q4FJQ0|Q4FJQ0_MOUSE;sp|P51150|RAB7A_MOUSE;tr|A0A0N4SVR6|A0A0N4SVR6_MOUSE;tr|A0A0N4SVG9|A0A0N4SVG9_MOUSE	tr|Q4FJQ0|Q4FJQ0_MOUSE MCG130610 OS=Mus musculus GN=Rab7 PE=1 SV=1;sp|P51150|RAB7A_MOUSE Ras-related protein Rab-7a OS=Mus musculus GN=Rab7a PE=1 SV=2;tr|A0A0N4SVR6|A0A0N4SVR6_MOUSE RAB7, member RAS oncogene family OS=Mus musculus GN=Rab7 PE=1 SV=1;tr|A0A0						24364000
tr|Q4FJQ6|Q4FJQ6_MOUSE;tr|Q3U3L3|Q3U3L3_MOUSE;sp|Q60854|SPB6_MOUSE;tr|F8WIV2|F8WIV2_MOUSE;tr|K7E6F1|K7E6F1_MOUSE;tr|E9Q3Y1|E9Q3Y1_MOUSE;tr|Q8BZR2|Q8BZR2_MOUSE;tr|E9Q6X2|E9Q6X2_MOUSE;tr|E9Q108|E9Q108_MOUSE;tr|E9Q0P9|E9Q0P9_MOUSE;tr|E9PYY0|E9PYY0_MOUSE;tr|E9PZQ9|E9PZQ9_MOUSE;tr|E9Q4R2|E9Q4R2_MOUSE;tr|E9Q5Q5|E9Q5Q5_MOUSE;tr|A0A1Y7VLW2|A0A1Y7VLW2_MOUSE;tr|Q6P6K7|Q6P6K7_MOUSE;tr|W4VSP4|W4VSP4_MOUSE;tr…	tr|Q4FJQ6|Q4FJQ6_MOUSE;tr|Q3U3L3|Q3U3L3_MOUSE;sp|Q60854|SPB6_MOUSE;tr|F8WIV2|F8WIV2_MOUSE;tr|K7E6F1|K7E6F1_MOUSE	tr|Q4FJQ6|Q4FJQ6_MOUSE Serine (Or cysteine) peptidase inhibitor, clade B, member 6a, isoform CRA_a OS=Mus musculus GN=Serpinb6a PE=1 SV=1;tr|Q3U3L3|Q3U3L3_MOUSE Uncharacterized protein OS=Mus musculus GN=Serpinb6a PE=2 SV=1;sp|Q60854|SPB6_MOUSE Serpin B6 O	69722500				77413000		63013000		65330000		75789000	56681000
tr|Q4FJS7|Q4FJS7_MOUSE;tr|Q3TBR2|Q3TBR2_MOUSE;sp|O88947|FA10_MOUSE;tr|Q3TDB9|Q3TDB9_MOUSE;tr|Q3U3V1|Q3U3V1_MOUSE;tr|Q80Y26|Q80Y26_MOUSE	tr|Q4FJS7|Q4FJS7_MOUSE;tr|Q3TBR2|Q3TBR2_MOUSE;sp|O88947|FA10_MOUSE;tr|Q3TDB9|Q3TDB9_MOUSE;tr|Q3U3V1|Q3U3V1_MOUSE	tr|Q4FJS7|Q4FJS7_MOUSE F10 protein OS=Mus musculus GN=F10 PE=2 SV=1;tr|Q3TBR2|Q3TBR2_MOUSE Coagulation factor X OS=Mus musculus GN=F10 PE=1 SV=1;sp|O88947|FA10_MOUSE Coagulation factor X OS=Mus musculus GN=F10 PE=1 SV=1;tr|Q3TDB9|Q3TDB9_MOUSE Uncharacteriz										35063000
tr|Q4FJX9|Q4FJX9_MOUSE;sp|P09671|SODM_MOUSE;tr|Q3U8W4|Q3U8W4_MOUSE;tr|Q3TJA2|Q3TJA2_MOUSE	tr|Q4FJX9|Q4FJX9_MOUSE;sp|P09671|SODM_MOUSE;tr|Q3U8W4|Q3U8W4_MOUSE;tr|Q3TJA2|Q3TJA2_MOUSE	tr|Q4FJX9|Q4FJX9_MOUSE Superoxide dismutase OS=Mus musculus GN=Sod2 PE=1 SV=1;sp|P09671|SODM_MOUSE Superoxide dismutase [Mn], mitochondrial OS=Mus musculus GN=Sod2 PE=1 SV=3;tr|Q3U8W4|Q3U8W4_MOUSE Superoxide dismutase OS=Mus musculus GN=Sod2 PE=2 SV=1;tr|Q						45499000	35400000
tr|Q4FK36|Q4FK36_MOUSE;sp|Q9R0P5|DEST_MOUSE	tr|Q4FK36|Q4FK36_MOUSE;sp|Q9R0P5|DEST_MOUSE	tr|Q4FK36|Q4FK36_MOUSE Destrin OS=Mus musculus GN=Dstn PE=1 SV=1;sp|Q9R0P5|DEST_MOUSE Destrin OS=Mus musculus GN=Dstn PE=1 SV=3	32699000				32221000	19443000	32026000
tr|Q4FK40|Q4FK40_MOUSE;tr|Q3UBS0|Q3UBS0_MOUSE;tr|Q3TXU4|Q3TXU4_MOUSE;sp|P08226|APOE_MOUSE;tr|Q6GTX3|Q6GTX3_MOUSE;tr|Q3UEE7|Q3UEE7_MOUSE;tr|Q3TX45|Q3TX45_MOUSE;tr|A0A1B0GX15|A0A1B0GX15_MOUSE;tr|G3UWN5|G3UWN5_MOUSE;tr|G3UZM8|G3UZM8_MOUSE;tr|Q3UF21|Q3UF21_MOUSE	tr|Q4FK40|Q4FK40_MOUSE;tr|Q3UBS0|Q3UBS0_MOUSE;tr|Q3TXU4|Q3TXU4_MOUSE;sp|P08226|APOE_MOUSE;tr|Q6GTX3|Q6GTX3_MOUSE;tr|Q3UEE7|Q3UEE7_MOUSE;tr|Q3TX45|Q3TX45_MOUSE;tr|A0A1B0GX15|A0A1B0GX15_MOUSE;tr|G3UWN5|G3UWN5_MOUSE	tr|Q4FK40|Q4FK40_MOUSE Apoe protein OS=Mus musculus GN=Apoe PE=2 SV=1;tr|Q3UBS0|Q3UBS0_MOUSE Uncharacterized protein OS=Mus musculus GN=Apoe PE=2 SV=1;tr|Q3TXU4|Q3TXU4_MOUSE Apolipoprotein E, isoform CRA_h OS=Mus musculus GN=Apoe PE=1 SV=1;sp|P08226|APOE_M	9651600000	19755000000	17757000000	20811000000	7920300000	13832000000	10596000000	9021000000	19454000000	12640000000	9780200000	12331000000
tr|Q4FK49|Q4FK49_MOUSE;sp|Q9D819|IPYR_MOUSE;tr|Q8BTY3|Q8BTY3_MOUSE;tr|Q3UA53|Q3UA53_MOUSE	tr|Q4FK49|Q4FK49_MOUSE;sp|Q9D819|IPYR_MOUSE;tr|Q8BTY3|Q8BTY3_MOUSE;tr|Q3UA53|Q3UA53_MOUSE	tr|Q4FK49|Q4FK49_MOUSE Pyp protein OS=Mus musculus GN=Ppa1 PE=1 SV=1;sp|Q9D819|IPYR_MOUSE Inorganic pyrophosphatase OS=Mus musculus GN=Ppa1 PE=1 SV=1;tr|Q8BTY3|Q8BTY3_MOUSE Uncharacterized protein OS=Mus musculus GN=Ppa1 PE=2 SV=1;tr|Q3UA53|Q3UA53_MOUSE Un	43599000				25453000		30788000				24793000	19367000
tr|Q4FK86|Q4FK86_MOUSE;sp|O88593|PGRP1_MOUSE	tr|Q4FK86|Q4FK86_MOUSE;sp|O88593|PGRP1_MOUSE	tr|Q4FK86|Q4FK86_MOUSE Peptidoglycan-recognition protein OS=Mus musculus GN=Pglyrp1 PE=1 SV=1;sp|O88593|PGRP1_MOUSE Peptidoglycan recognition protein 1 OS=Mus musculus GN=Pglyrp1 PE=1 SV=1	61968000	59882000		127260000	50333000	45581000	67103000	98722000	68982000	46172000	59575000	73022000
tr|Q4FK88|Q4FK88_MOUSE;tr|Q4FJV4|Q4FJV4_MOUSE;tr|Q3U5N9|Q3U5N9_MOUSE;tr|B7STB7|B7STB7_MOUSE;sp|P10107|ANXA1_MOUSE;tr|Q3US43|Q3US43_MOUSE	tr|Q4FK88|Q4FK88_MOUSE;tr|Q4FJV4|Q4FJV4_MOUSE;tr|Q3U5N9|Q3U5N9_MOUSE;tr|B7STB7|B7STB7_MOUSE;sp|P10107|ANXA1_MOUSE;tr|Q3US43|Q3US43_MOUSE	tr|Q4FK88|Q4FK88_MOUSE Annexin OS=Mus musculus GN=Anxa1 PE=2 SV=1;tr|Q4FJV4|Q4FJV4_MOUSE Annexin OS=Mus musculus GN=Anxa1 PE=1 SV=1;tr|Q3U5N9|Q3U5N9_MOUSE Annexin OS=Mus musculus GN=Anxa1 PE=2 SV=1;tr|B7STB7|B7STB7_MOUSE Annexin OS=Mus musculus GN=Anxa1 PE	44075500	52053000	42047000		138940000	86695000	72680000	53303000	36825000	31101000	39038000	26514000
tr|Q4FZJ6|Q4FZJ6_MOUSE;sp|Q9DAU7|WFDC2_MOUSE;tr|A2A5G4|A2A5G4_MOUSE;tr|A2A5G5|A2A5G5_MOUSE;tr|A2A5G6|A2A5G6_MOUSE	tr|Q4FZJ6|Q4FZJ6_MOUSE;sp|Q9DAU7|WFDC2_MOUSE;tr|A2A5G4|A2A5G4_MOUSE;tr|A2A5G5|A2A5G5_MOUSE;tr|A2A5G6|A2A5G6_MOUSE	tr|Q4FZJ6|Q4FZJ6_MOUSE WAP four-disulfide core domain 2 OS=Mus musculus GN=Wfdc2 PE=1 SV=1;sp|Q9DAU7|WFDC2_MOUSE WAP four-disulfide core domain protein 2 OS=Mus musculus GN=Wfdc2 PE=1 SV=1;tr|A2A5G4|A2A5G4_MOUSE WAP four-disulfide core domain protein 2 OS=		15367000		15295000					16823000
tr|Q4JFI8|Q4JFI8_MOUSE;sp|P12246|SAMP_MOUSE	tr|Q4JFI8|Q4JFI8_MOUSE;sp|P12246|SAMP_MOUSE	tr|Q4JFI8|Q4JFI8_MOUSE Pentaxin OS=Mus musculus GN=Apcs PE=1 SV=1;sp|P12246|SAMP_MOUSE Serum amyloid P-component OS=Mus musculus GN=Apcs PE=1 SV=2					65578000
tr|Q4KL76|Q4KL76_MOUSE;sp|Q64433|CH10_MOUSE;tr|Q9JI95|Q9JI95_MOUSE	tr|Q4KL76|Q4KL76_MOUSE;sp|Q64433|CH10_MOUSE;tr|Q9JI95|Q9JI95_MOUSE	tr|Q4KL76|Q4KL76_MOUSE Heat shock protein 1 (Chaperonin 10) OS=Mus musculus GN=Hspe1 PE=1 SV=1;sp|Q64433|CH10_MOUSE 10 kDa heat shock protein, mitochondrial OS=Mus musculus GN=Hspe1 PE=1 SV=2;tr|Q9JI95|Q9JI95_MOUSE CPN10-like protein OS=Mus musculus GN=Cpn					48029000	54577000					55456000
tr|Q4KML7|Q4KML7_MOUSE;tr|Q3UXR4|Q3UXR4_MOUSE;tr|Q3UL48|Q3UL48_MOUSE;tr|Q3TCP5|Q3TCP5_MOUSE;sp|P26040|EZRI_MOUSE	tr|Q4KML7|Q4KML7_MOUSE;tr|Q3UXR4|Q3UXR4_MOUSE;tr|Q3UL48|Q3UL48_MOUSE;tr|Q3TCP5|Q3TCP5_MOUSE;sp|P26040|EZRI_MOUSE	tr|Q4KML7|Q4KML7_MOUSE Ezrin OS=Mus musculus GN=Ezr PE=1 SV=1;tr|Q3UXR4|Q3UXR4_MOUSE Uncharacterized protein OS=Mus musculus GN=Ezr PE=2 SV=1;tr|Q3UL48|Q3UL48_MOUSE Uncharacterized protein OS=Mus musculus GN=Ezr PE=2 SV=1;tr|Q3TCP5|Q3TCP5_MOUSE Uncharacter
tr|Q4L0E7|Q4L0E7_MOUSE;tr|Q678L1|Q678L1_MOUSE	tr|Q4L0E7|Q4L0E7_MOUSE;tr|Q678L1|Q678L1_MOUSE	tr|Q4L0E7|Q4L0E7_MOUSE Type II cytokeratin Kb39 (Fragment) OS=Mus musculus GN=Krt77 PE=2 SV=1;tr|Q678L1|Q678L1_MOUSE Keratin 1b (Fragment) OS=Mus musculus GN=Krt77 PE=2 SV=1								9258300
tr|Q4VAE6|Q4VAE6_MOUSE;tr|Q3TN61|Q3TN61_MOUSE;sp|Q9QUI0|RHOA_MOUSE;tr|A0A0A6YXF6|A0A0A6YXF6_MOUSE;sp|Q62159|RHOC_MOUSE;tr|H3BL56|H3BL56_MOUSE;tr|A0A0G2JEP8|A0A0G2JEP8_MOUSE;tr|Q9CR99|Q9CR99_MOUSE;tr|C0IQA7|C0IQA7_MOUSE;tr|Q4FJM5|Q4FJM5_MOUSE;tr|Q3TIC2|Q3TIC2_MOUSE;sp|P62746|RHOB_MOUSE	tr|Q4VAE6|Q4VAE6_MOUSE;tr|Q3TN61|Q3TN61_MOUSE;sp|Q9QUI0|RHOA_MOUSE;tr|A0A0A6YXF6|A0A0A6YXF6_MOUSE;sp|Q62159|RHOC_MOUSE;tr|H3BL56|H3BL56_MOUSE	tr|Q4VAE6|Q4VAE6_MOUSE Ras family member A OS=Mus musculus GN=Rhoa PE=1 SV=1;tr|Q3TN61|Q3TN61_MOUSE Uncharacterized protein OS=Mus musculus GN=Rhoa PE=2 SV=1;sp|Q9QUI0|RHOA_MOUSE Transforming protein RhoA OS=Mus musculus GN=Rhoa PE=1 SV=1;tr|A0A0A6YXF6|A0A					23863000		21910000
tr|Q4VAI2|Q4VAI2_MOUSE;sp|Q9D358|PPAC_MOUSE;tr|A0A1W2P7X3|A0A1W2P7X3_MOUSE;tr|Q561M1|Q561M1_MOUSE	tr|Q4VAI2|Q4VAI2_MOUSE;sp|Q9D358|PPAC_MOUSE;tr|A0A1W2P7X3|A0A1W2P7X3_MOUSE;tr|Q561M1|Q561M1_MOUSE	tr|Q4VAI2|Q4VAI2_MOUSE Acid phosphatase 1, soluble OS=Mus musculus GN=Acp1 PE=2 SV=1;sp|Q9D358|PPAC_MOUSE Low molecular weight phosphotyrosine protein phosphatase OS=Mus musculus GN=Acp1 PE=1 SV=3;tr|A0A1W2P7X3|A0A1W2P7X3_MOUSE Low molecular weight phospho	62560000	30101000	27125000	25883000	55337000	45934000	66533000	50791000	34795000	86468000	57912000	68079000
tr|Q52KF2|Q52KF2_MOUSE;tr|A0A0R4J0Y4|A0A0R4J0Y4_MOUSE;sp|Q6P1D5|SE6L1_MOUSE;tr|A0A1D5RMI4|A0A1D5RMI4_MOUSE;tr|Q80TP0|Q80TP0_MOUSE;tr|A0A0G2JFG4|A0A0G2JFG4_MOUSE;tr|A0A1D5RMJ7|A0A1D5RMJ7_MOUSE;tr|A0A0G2JG23|A0A0G2JG23_MOUSE	tr|Q52KF2|Q52KF2_MOUSE;tr|A0A0R4J0Y4|A0A0R4J0Y4_MOUSE;sp|Q6P1D5|SE6L1_MOUSE;tr|A0A1D5RMI4|A0A1D5RMI4_MOUSE;tr|Q80TP0|Q80TP0_MOUSE;tr|A0A0G2JFG4|A0A0G2JFG4_MOUSE;tr|A0A1D5RMJ7|A0A1D5RMJ7_MOUSE;tr|A0A0G2JG23|A0A0G2JG23_MOUSE	tr|Q52KF2|Q52KF2_MOUSE Sez6l protein (Fragment) OS=Mus musculus GN=Sez6l PE=2 SV=1;tr|A0A0R4J0Y4|A0A0R4J0Y4_MOUSE MCG3478 OS=Mus musculus GN=Sez6l PE=1 SV=1;sp|Q6P1D5|SE6L1_MOUSE Seizure 6-like protein OS=Mus musculus GN=Sez6l PE=1 SV=1;tr|A0A1D5RMI4|A0A1D		35630000		31759000
tr|Q52L50|Q52L50_MOUSE;sp|Q99JI6|RAP1B_MOUSE;tr|A0A0G2JDL9|A0A0G2JDL9_MOUSE;tr|Q3U7U8|Q3U7U8_MOUSE;tr|C5H0E8|C5H0E8_MOUSE;sp|P62835|RAP1A_MOUSE;tr|A0A1W2P777|A0A1W2P777_MOUSE;tr|A0A0G2JE52|A0A0G2JE52_MOUSE;tr|Q3V3W9|Q3V3W9_MOUSE;tr|C5H0E9|C5H0E9_MOUSE;tr|A0A0G2JED9|A0A0G2JED9_MOUSE;tr|Q8BP17|Q8BP17_MOUSE;tr|Q543Q4|Q543Q4_MOUSE;sp|P35276|RAB3D_MOUSE	tr|Q52L50|Q52L50_MOUSE;sp|Q99JI6|RAP1B_MOUSE;tr|A0A0G2JDL9|A0A0G2JDL9_MOUSE;tr|Q3U7U8|Q3U7U8_MOUSE;tr|C5H0E8|C5H0E8_MOUSE;sp|P62835|RAP1A_MOUSE	tr|Q52L50|Q52L50_MOUSE RAS related protein 1b OS=Mus musculus GN=Rap1b PE=1 SV=1;sp|Q99JI6|RAP1B_MOUSE Ras-related protein Rap-1b OS=Mus musculus GN=Rap1b PE=1 SV=2;tr|A0A0G2JDL9|A0A0G2JDL9_MOUSE MCG10748, isoform CRA_b OS=Mus musculus GN=Rap1a PE=1 SV=1;t					26511000
tr|Q52L78|Q52L78_MOUSE;sp|P23927|CRYAB_MOUSE;tr|A0A1L1SRG5|A0A1L1SRG5_MOUSE	tr|Q52L78|Q52L78_MOUSE;sp|P23927|CRYAB_MOUSE;tr|A0A1L1SRG5|A0A1L1SRG5_MOUSE	tr|Q52L78|Q52L78_MOUSE Cryab protein OS=Mus musculus GN=Cryab PE=1 SV=1;sp|P23927|CRYAB_MOUSE Alpha-crystallin B chain OS=Mus musculus GN=Cryab PE=1 SV=2;tr|A0A1L1SRG5|A0A1L1SRG5_MOUSE Alpha-crystallin B chain (Fragment) OS=Mus musculus GN=Cryab PE=1 SV=1	372775000	117290000			198060000	202250000	212130000				160770000	48337000
tr|Q52L98|Q52L98_MOUSE;tr|Q99KT4|Q99KT4_MOUSE;tr|Q80V56|Q80V56_MOUSE;tr|Q8K326|Q8K326_MOUSE;tr|Q5EBX5|Q5EBX5_MOUSE;tr|Q6PCM6|Q6PCM6_MOUSE;tr|Z4YK85|Z4YK85_MOUSE;tr|M0QWP1|M0QWP1_MOUSE;sp|A2ASQ1|AGRIN_MOUSE	tr|Q52L98|Q52L98_MOUSE;tr|Q99KT4|Q99KT4_MOUSE;tr|Q80V56|Q80V56_MOUSE;tr|Q8K326|Q8K326_MOUSE;tr|Q5EBX5|Q5EBX5_MOUSE;tr|Q6PCM6|Q6PCM6_MOUSE;tr|Z4YK85|Z4YK85_MOUSE;tr|M0QWP1|M0QWP1_MOUSE;sp|A2ASQ1|AGRIN_MOUSE	tr|Q52L98|Q52L98_MOUSE Agrn protein (Fragment) OS=Mus musculus GN=Agrn PE=2 SV=1;tr|Q99KT4|Q99KT4_MOUSE Agrn protein (Fragment) OS=Mus musculus GN=Agrn PE=2 SV=1;tr|Q80V56|Q80V56_MOUSE Agrn protein (Fragment) OS=Mus musculus GN=Agrn PE=2 SV=1;tr|Q8K326|Q8K											7033800
tr|Q53ZN9|Q53ZN9_MOUSE;tr|Q3U065|Q3U065_MOUSE;tr|Q3TZJ1|Q3TZJ1_MOUSE;tr|Q3TNL6|Q3TNL6_MOUSE;sp|P04919|B3AT_MOUSE;tr|Q3TAJ4|Q3TAJ4_MOUSE;tr|Q3TZ12|Q3TZ12_MOUSE;tr|Q3TZ29|Q3TZ29_MOUSE;tr|Q3TA19|Q3TA19_MOUSE;tr|Q3TZG9|Q3TZG9_MOUSE;tr|Q3TNH7|Q3TNH7_MOUSE	tr|Q53ZN9|Q53ZN9_MOUSE;tr|Q3U065|Q3U065_MOUSE;tr|Q3TZJ1|Q3TZJ1_MOUSE;tr|Q3TNL6|Q3TNL6_MOUSE;sp|P04919|B3AT_MOUSE;tr|Q3TAJ4|Q3TAJ4_MOUSE;tr|Q3TZ12|Q3TZ12_MOUSE;tr|Q3TZ29|Q3TZ29_MOUSE;tr|Q3TA19|Q3TA19_MOUSE;tr|Q3TZG9|Q3TZG9_MOUSE	tr|Q53ZN9|Q53ZN9_MOUSE Anion exchange protein OS=Mus musculus GN=Slc4a1 PE=2 SV=1;tr|Q3U065|Q3U065_MOUSE Anion exchange protein OS=Mus musculus GN=Slc4a1 PE=2 SV=1;tr|Q3TZJ1|Q3TZJ1_MOUSE Anion exchange protein OS=Mus musculus GN=Slc4a1 PE=2 SV=1;tr|Q3TNL6|	912075000		100220000		262550000	487020000	266510000	397370000	363660000	2234900000	597640000	978120000
tr|Q53ZT3|Q53ZT3_MOUSE;sp|P12023|A4_MOUSE;tr|Q3TWF3|Q3TWF3_MOUSE;tr|Q6GR78|Q6GR78_MOUSE;tr|Q3TXI9|Q3TXI9_MOUSE;tr|Q3TVS1|Q3TVS1_MOUSE;tr|Q8BPC7|Q8BPC7_MOUSE;tr|Q8BPV5|Q8BPV5_MOUSE	tr|Q53ZT3|Q53ZT3_MOUSE;sp|P12023|A4_MOUSE;tr|Q3TWF3|Q3TWF3_MOUSE;tr|Q6GR78|Q6GR78_MOUSE;tr|Q3TXI9|Q3TXI9_MOUSE;tr|Q3TVS1|Q3TVS1_MOUSE	tr|Q53ZT3|Q53ZT3_MOUSE Amyloid-beta protein-like protein long isoform OS=Mus musculus GN=App PE=2 SV=1;sp|P12023|A4_MOUSE Amyloid-beta A4 protein OS=Mus musculus GN=App PE=1 SV=3;tr|Q3TWF3|Q3TWF3_MOUSE Uncharacterized protein OS=Mus musculus GN=App PE=2 SV	1994150000	4321300000	3567000000	5458700000	1668000000	2789300000	2468200000	2058800000	3471600000	2075500000	1800900000	2238300000
tr|Q540D7|Q540D7_MOUSE;sp|Q9JII6|AK1A1_MOUSE;tr|Q80XJ7|Q80XJ7_MOUSE;tr|Q3UJW9|Q3UJW9_MOUSE;tr|B1AXW3|B1AXW3_MOUSE;tr|Q810X5|Q810X5_MOUSE	tr|Q540D7|Q540D7_MOUSE;sp|Q9JII6|AK1A1_MOUSE;tr|Q80XJ7|Q80XJ7_MOUSE;tr|Q3UJW9|Q3UJW9_MOUSE;tr|B1AXW3|B1AXW3_MOUSE	tr|Q540D7|Q540D7_MOUSE Aldehyde reductase OS=Mus musculus GN=Akr1a1 PE=1 SV=1;sp|Q9JII6|AK1A1_MOUSE Alcohol dehydrogenase [NADP(+)] OS=Mus musculus GN=Akr1a1 PE=1 SV=3;tr|Q80XJ7|Q80XJ7_MOUSE Aldo-keto reductase family 1, member A4 (Aldehyde reductase) OS=M	75984000	54999000	43256000		112350000	93931000	92772000	81029000	56979000	71922000	86806000	64058000
tr|Q542G9|Q542G9_MOUSE;sp|P07356|ANXA2_MOUSE;tr|Q9CZI7|Q9CZI7_MOUSE;tr|Q3UCD3|Q3UCD3_MOUSE;tr|B0V2N7|B0V2N7_MOUSE;tr|B0V2N8|B0V2N8_MOUSE;tr|Q99KH3|Q99KH3_MOUSE;tr|B0V2N5|B0V2N5_MOUSE	tr|Q542G9|Q542G9_MOUSE;sp|P07356|ANXA2_MOUSE;tr|Q9CZI7|Q9CZI7_MOUSE;tr|Q3UCD3|Q3UCD3_MOUSE;tr|B0V2N7|B0V2N7_MOUSE;tr|B0V2N8|B0V2N8_MOUSE;tr|Q99KH3|Q99KH3_MOUSE;tr|B0V2N5|B0V2N5_MOUSE	tr|Q542G9|Q542G9_MOUSE Annexin OS=Mus musculus GN=Anxa2 PE=1 SV=1;sp|P07356|ANXA2_MOUSE Annexin A2 OS=Mus musculus GN=Anxa2 PE=1 SV=2;tr|Q9CZI7|Q9CZI7_MOUSE Annexin OS=Mus musculus GN=Anxa2 PE=2 SV=1;tr|Q3UCD3|Q3UCD3_MOUSE Annexin OS=Mus musculus GN=Anxa2	235980000	426540000	273850000	194330000	991510000	589730000	576830000	483760000	344880000	201990000	313960000	213400000
tr|Q542H2|Q542H2_MOUSE;tr|Q3TN31|Q3TN31_MOUSE;sp|Q9Z2U0|PSA7_MOUSE;tr|Q3UIT9|Q3UIT9_MOUSE;tr|Q3THL2|Q3THL2_MOUSE;tr|B7ZMS4|B7ZMS4_MOUSE;sp|Q9CWH6|PSA7L_MOUSE;tr|B7ZMS3|B7ZMS3_MOUSE	tr|Q542H2|Q542H2_MOUSE;tr|Q3TN31|Q3TN31_MOUSE;sp|Q9Z2U0|PSA7_MOUSE;tr|Q3UIT9|Q3UIT9_MOUSE;tr|Q3THL2|Q3THL2_MOUSE;tr|B7ZMS4|B7ZMS4_MOUSE;sp|Q9CWH6|PSA7L_MOUSE	tr|Q542H2|Q542H2_MOUSE Proteasome subunit alpha type OS=Mus musculus GN=Psma7 PE=1 SV=1;tr|Q3TN31|Q3TN31_MOUSE Proteasome subunit alpha type OS=Mus musculus GN=Psma7 PE=2 SV=1;sp|Q9Z2U0|PSA7_MOUSE Proteasome subunit alpha type-7 OS=Mus musculus GN=Psma7 PE	36263000					41490000				54564000	31086000	36930000
tr|Q542H7|Q542H7_MOUSE;sp|P04117|FABP4_MOUSE;tr|Q99M00|Q99M00_MOUSE;tr|A0A0A6YW05|A0A0A6YW05_MOUSE;tr|A0A0A6YXB9|A0A0A6YXB9_MOUSE;sp|P24526|MYP2_MOUSE;sp|O08716|FABP9_MOUSE;tr|A0A0A6YXI2|A0A0A6YXI2_MOUSE	tr|Q542H7|Q542H7_MOUSE;sp|P04117|FABP4_MOUSE	tr|Q542H7|Q542H7_MOUSE Fabp4 protein OS=Mus musculus GN=Fabp4 PE=1 SV=1;sp|P04117|FABP4_MOUSE Fatty acid-binding protein, adipocyte OS=Mus musculus GN=Fabp4 PE=1 SV=3	306230000	118270000	112770000	110590000	204330000	83805000	215570000		102570000		84133000	67449000
tr|Q542I3|Q542I3_MOUSE;tr|I6L966|I6L966_MOUSE;sp|P14847|CRP_MOUSE	tr|Q542I3|Q542I3_MOUSE;tr|I6L966|I6L966_MOUSE;sp|P14847|CRP_MOUSE	tr|Q542I3|Q542I3_MOUSE Pentaxin OS=Mus musculus GN=Crp PE=2 SV=1;tr|I6L966|I6L966_MOUSE Pentaxin OS=Mus musculus GN=Crp PE=2 SV=1;sp|P14847|CRP_MOUSE C-reactive protein OS=Mus musculus GN=Crp PE=1 SV=2									30756000	44908000	34265000
tr|Q542P5|Q542P5_MOUSE;sp|P08074|CBR2_MOUSE;tr|F6YNX9|F6YNX9_MOUSE	tr|Q542P5|Q542P5_MOUSE;sp|P08074|CBR2_MOUSE;tr|F6YNX9|F6YNX9_MOUSE	tr|Q542P5|Q542P5_MOUSE Carbonyl reductase 2, isoform CRA_b OS=Mus musculus GN=Cbr2 PE=1 SV=1;sp|P08074|CBR2_MOUSE Carbonyl reductase [NADPH] 2 OS=Mus musculus GN=Cbr2 PE=1 SV=1;tr|F6YNX9|F6YNX9_MOUSE Carbonyl reductase [NADPH] 2 (Fragment) OS=Mus musculus											2028500
tr|Q542X9|Q542X9_MOUSE;tr|O88592|O88592_MOUSE;sp|O09164|SODE_MOUSE;tr|Q64466|Q64466_MOUSE;tr|Q3UM12|Q3UM12_MOUSE	tr|Q542X9|Q542X9_MOUSE;tr|O88592|O88592_MOUSE;sp|O09164|SODE_MOUSE;tr|Q64466|Q64466_MOUSE;tr|Q3UM12|Q3UM12_MOUSE	tr|Q542X9|Q542X9_MOUSE Superoxide dismutase [Cu-Zn] OS=Mus musculus GN=Sod3 PE=1 SV=1;tr|O88592|O88592_MOUSE Superoxide dismutase [Cu-Zn] OS=Mus musculus GN=Sod3 PE=2 SV=1;sp|O09164|SODE_MOUSE Extracellular superoxide dismutase [Cu-Zn] OS=Mus musculus GN=S	148365000	217680000	183840000	191300000	166210000	203960000	174340000	129530000	172480000	176500000	119670000	164350000
tr|Q542Y0|Q542Y0_MOUSE;sp|Q64669|NQO1_MOUSE;tr|Q99KL8|Q99KL8_MOUSE	tr|Q542Y0|Q542Y0_MOUSE;sp|Q64669|NQO1_MOUSE;tr|Q99KL8|Q99KL8_MOUSE	tr|Q542Y0|Q542Y0_MOUSE NAD(P)H dehydrogenase, quinone 1 OS=Mus musculus GN=Nqo1 PE=1 SV=1;sp|Q64669|NQO1_MOUSE NAD(P)H dehydrogenase [quinone] 1 OS=Mus musculus GN=Nqo1 PE=1 SV=3;tr|Q99KL8|Q99KL8_MOUSE Nqo1 protein OS=Mus musculus GN=Nqo1 PE=2 SV=1	19044000
tr|Q543B9|Q543B9_MOUSE;tr|Q3TCS0|Q3TCS0_MOUSE;sp|Q9QUR6|PPCE_MOUSE;tr|Q8C6A3|Q8C6A3_MOUSE	tr|Q543B9|Q543B9_MOUSE;tr|Q3TCS0|Q3TCS0_MOUSE;sp|Q9QUR6|PPCE_MOUSE;tr|Q8C6A3|Q8C6A3_MOUSE	tr|Q543B9|Q543B9_MOUSE Prolyl endopeptidase OS=Mus musculus GN=Prep PE=1 SV=1;tr|Q3TCS0|Q3TCS0_MOUSE Uncharacterized protein OS=Mus musculus GN=Prep PE=2 SV=1;sp|Q9QUR6|PPCE_MOUSE Prolyl endopeptidase OS=Mus musculus GN=Prep PE=1 SV=1;tr|Q8C6A3|Q8C6A3_MOUS	40589000
tr|Q543C5|Q543C5_MOUSE;sp|Q62000|MIME_MOUSE	tr|Q543C5|Q543C5_MOUSE;sp|Q62000|MIME_MOUSE	tr|Q543C5|Q543C5_MOUSE Osteoglycin OS=Mus musculus GN=Ogn PE=1 SV=1;sp|Q62000|MIME_MOUSE Mimecan OS=Mus musculus GN=Ogn PE=1 SV=1	82513500	173590000	97359000	222880000	241820000	116730000	258610000	169640000	78330000	44340000	127650000	106600000
tr|Q543J5|Q543J5_MOUSE;sp|P32261|ANT3_MOUSE;tr|A0A0A6YWH7|A0A0A6YWH7_MOUSE;CON__P41361;tr|A0A0A6YXS8|A0A0A6YXS8_MOUSE;tr|A0A0A6YX49|A0A0A6YX49_MOUSE;tr|A0A0A6YX70|A0A0A6YX70_MOUSE	tr|Q543J5|Q543J5_MOUSE;sp|P32261|ANT3_MOUSE;tr|A0A0A6YWH7|A0A0A6YWH7_MOUSE	tr|Q543J5|Q543J5_MOUSE Antithrombin OS=Mus musculus GN=Serpinc1 PE=1 SV=1;sp|P32261|ANT3_MOUSE Antithrombin-III OS=Mus musculus GN=Serpinc1 PE=1 SV=1;tr|A0A0A6YWH7|A0A0A6YWH7_MOUSE Antithrombin-III (Fragment) OS=Mus musculus GN=Serpinc1 PE=1 SV=1	1909250000	2608300000	2554600000	2421700000	1960700000	1931700000	2510300000	3144900000	2407300000	2471100000	2164200000	2627700000
tr|Q543K9|Q543K9_MOUSE;sp|P23492|PNPH_MOUSE;tr|Q9D8C9|Q9D8C9_MOUSE	tr|Q543K9|Q543K9_MOUSE;sp|P23492|PNPH_MOUSE;tr|Q9D8C9|Q9D8C9_MOUSE	tr|Q543K9|Q543K9_MOUSE Purine nucleoside phosphorylase OS=Mus musculus GN=Pnp PE=1 SV=1;sp|P23492|PNPH_MOUSE Purine nucleoside phosphorylase OS=Mus musculus GN=Pnp PE=1 SV=2;tr|Q9D8C9|Q9D8C9_MOUSE Purine nucleoside phosphorylase OS=Mus musculus GN=Pnp2 PE=	386185000		72900000		171390000	81588000	144830000	144480000	83015000	340380000	171210000	216520000
tr|Q543Q7|Q543Q7_MOUSE;sp|O35393|EFNB3_MOUSE	tr|Q543Q7|Q543Q7_MOUSE;sp|O35393|EFNB3_MOUSE	tr|Q543Q7|Q543Q7_MOUSE Ephrin B3 OS=Mus musculus GN=Efnb3 PE=1 SV=1;sp|O35393|EFNB3_MOUSE Ephrin-B3 OS=Mus musculus GN=Efnb3 PE=1 SV=1		33343000	29931000	44388000				25425000	22565000
tr|Q543R4|Q543R4_MOUSE;sp|Q00493|CBPE_MOUSE	tr|Q543R4|Q543R4_MOUSE;sp|Q00493|CBPE_MOUSE	tr|Q543R4|Q543R4_MOUSE Uncharacterized protein OS=Mus musculus GN=Cpe PE=1 SV=1;sp|Q00493|CBPE_MOUSE Carboxypeptidase E OS=Mus musculus GN=Cpe PE=1 SV=2	258960000	395550000	316750000	403120000	329950000	375700000	391450000	294680000	406000000	369540000	302070000	415730000
tr|Q543S2|Q543S2_MOUSE;sp|P18872|GNAO_MOUSE;tr|D3Z2M7|D3Z2M7_MOUSE	tr|Q543S2|Q543S2_MOUSE;sp|P18872|GNAO_MOUSE;tr|D3Z2M7|D3Z2M7_MOUSE	tr|Q543S2|Q543S2_MOUSE Guanine nucleotide binding protein, alpha o, isoform CRA_b OS=Mus musculus GN=Gnao1 PE=2 SV=1;sp|P18872|GNAO_MOUSE Guanine nucleotide-binding protein G(o) subunit alpha OS=Mus musculus GN=Gnao1 PE=1 SV=3;tr|D3Z2M7|D3Z2M7_MOUSE Guanin											7545700
tr|Q543T5|Q543T5_MOUSE;sp|O88745|SCRG1_MOUSE	tr|Q543T5|Q543T5_MOUSE;sp|O88745|SCRG1_MOUSE	tr|Q543T5|Q543T5_MOUSE Scrapie responsive gene 1 OS=Mus musculus GN=Scrg1 PE=2 SV=1;sp|O88745|SCRG1_MOUSE Scrapie-responsive protein 1 OS=Mus musculus GN=Scrg1 PE=2 SV=1		22312000					15825000
tr|Q543U6|Q543U6_MOUSE;sp|Q64387|PNOC_MOUSE;tr|B7ZMX9|B7ZMX9_MOUSE;tr|Q99NQ2|Q99NQ2_MOUSE	tr|Q543U6|Q543U6_MOUSE;sp|Q64387|PNOC_MOUSE;tr|B7ZMX9|B7ZMX9_MOUSE	tr|Q543U6|Q543U6_MOUSE Prepronociceptin OS=Mus musculus GN=Pnoc PE=2 SV=1;sp|Q64387|PNOC_MOUSE Prepronociceptin OS=Mus musculus GN=Pnoc PE=2 SV=1;tr|B7ZMX9|B7ZMX9_MOUSE Pnoc protein OS=Mus musculus GN=Pnoc PE=2 SV=1		109330000	118770000	151230000		113020000	77312000	86436000	88206000		60625000	79690000
tr|Q544F6|Q544F6_MOUSE;sp|Q9CQI6|COTL1_MOUSE	tr|Q544F6|Q544F6_MOUSE;sp|Q9CQI6|COTL1_MOUSE	tr|Q544F6|Q544F6_MOUSE Cotl1 protein OS=Mus musculus GN=Cotl1 PE=1 SV=1;sp|Q9CQI6|COTL1_MOUSE Coactosin-like protein OS=Mus musculus GN=Cotl1 PE=1 SV=3					57989000
tr|Q544G5|Q544G5_MOUSE;sp|Q62165|DAG1_MOUSE;tr|Q8CBE6|Q8CBE6_MOUSE;tr|Q8BPJ7|Q8BPJ7_MOUSE;tr|D9IFT4|D9IFT4_MOUSE	tr|Q544G5|Q544G5_MOUSE;sp|Q62165|DAG1_MOUSE;tr|Q8CBE6|Q8CBE6_MOUSE;tr|Q8BPJ7|Q8BPJ7_MOUSE;tr|D9IFT4|D9IFT4_MOUSE	tr|Q544G5|Q544G5_MOUSE Dystroglycan 1 OS=Mus musculus GN=Dag1 PE=1 SV=1;sp|Q62165|DAG1_MOUSE Dystroglycan OS=Mus musculus GN=Dag1 PE=1 SV=4;tr|Q8CBE6|Q8CBE6_MOUSE Uncharacterized protein OS=Mus musculus GN=Dag1 PE=2 SV=1;tr|Q8BPJ7|Q8BPJ7_MOUSE Uncharacteri		52312000		50294000			35720000
tr|Q544M1|Q544M1_MOUSE;sp|Q9WUC3|LY6H_MOUSE;tr|Q8K356|Q8K356_MOUSE;tr|Q9D1X6|Q9D1X6_MOUSE	tr|Q544M1|Q544M1_MOUSE;sp|Q9WUC3|LY6H_MOUSE;tr|Q8K356|Q8K356_MOUSE;tr|Q9D1X6|Q9D1X6_MOUSE	tr|Q544M1|Q544M1_MOUSE Lymphocyte antigen 6 complex, locus H, isoform CRA_a OS=Mus musculus GN=Ly6h PE=1 SV=1;sp|Q9WUC3|LY6H_MOUSE Lymphocyte antigen 6H OS=Mus musculus GN=Ly6h PE=1 SV=2;tr|Q8K356|Q8K356_MOUSE Lymphocyte antigen 6 complex, locus H OS=Mus m	232210000	459430000	404180000	602610000	246860000	470820000	385050000	342020000	391060000	237670000	230310000	272170000
tr|Q544R1|Q544R1_MOUSE;sp|Q9Z2Y8|PLPHP_MOUSE;tr|Q3UYN1|Q3UYN1_MOUSE;tr|A0A1B0GRP7|A0A1B0GRP7_MOUSE;tr|A0A1B0GSA1|A0A1B0GSA1_MOUSE;tr|A0A1B0GSP5|A0A1B0GSP5_MOUSE;tr|A0A1B0GQY5|A0A1B0GQY5_MOUSE;tr|A0A1B0GRR5|A0A1B0GRR5_MOUSE;tr|Q6P8V7|Q6P8V7_MOUSE	tr|Q544R1|Q544R1_MOUSE;sp|Q9Z2Y8|PLPHP_MOUSE;tr|Q3UYN1|Q3UYN1_MOUSE;tr|A0A1B0GRP7|A0A1B0GRP7_MOUSE;tr|A0A1B0GSA1|A0A1B0GSA1_MOUSE;tr|A0A1B0GSP5|A0A1B0GSP5_MOUSE;tr|A0A1B0GQY5|A0A1B0GQY5_MOUSE;tr|A0A1B0GRR5|A0A1B0GRR5_MOUSE;tr|Q6P8V7|Q6P8V7_MOUSE	tr|Q544R1|Q544R1_MOUSE Proline synthetase co-transcribed OS=Mus musculus GN=Plpbp PE=1 SV=1;sp|Q9Z2Y8|PLPHP_MOUSE Pyridoxal phosphate homeostasis protein OS=Mus musculus GN=Prosc PE=1 SV=1;tr|Q3UYN1|Q3UYN1_MOUSE Uncharacterized protein OS=Mus musculus GN=P	15738000
tr|Q544T7|Q544T7_MOUSE;sp|P45700|MA1A1_MOUSE;tr|A0A1W2P788|A0A1W2P788_MOUSE;tr|A0A1W2P6N0|A0A1W2P6N0_MOUSE;tr|Q3UFM4|Q3UFM4_MOUSE	tr|Q544T7|Q544T7_MOUSE;sp|P45700|MA1A1_MOUSE;tr|A0A1W2P788|A0A1W2P788_MOUSE;tr|A0A1W2P6N0|A0A1W2P6N0_MOUSE;tr|Q3UFM4|Q3UFM4_MOUSE	tr|Q544T7|Q544T7_MOUSE alpha-1,2-Mannosidase OS=Mus musculus GN=Man1a PE=1 SV=1;sp|P45700|MA1A1_MOUSE Mannosyl-oligosaccharide 1,2-alpha-mannosidase IA OS=Mus musculus GN=Man1a1 PE=1 SV=1;tr|A0A1W2P788|A0A1W2P788_MOUSE alpha-1,2-Mannosidase (Fragment) OS=M			51574000		52669000				56934000
tr|Q544Y7|Q544Y7_MOUSE;sp|P18760|COF1_MOUSE;tr|F8WGL3|F8WGL3_MOUSE;tr|Q9CX22|Q9CX22_MOUSE	tr|Q544Y7|Q544Y7_MOUSE;sp|P18760|COF1_MOUSE;tr|F8WGL3|F8WGL3_MOUSE;tr|Q9CX22|Q9CX22_MOUSE	tr|Q544Y7|Q544Y7_MOUSE Cofilin 1, non-muscle OS=Mus musculus GN=Cfl1 PE=2 SV=1;sp|P18760|COF1_MOUSE Cofilin-1 OS=Mus musculus GN=Cfl1 PE=1 SV=3;tr|F8WGL3|F8WGL3_MOUSE Cofilin-1 OS=Mus musculus GN=Cfl1 PE=1 SV=1;tr|Q9CX22|Q9CX22_MOUSE Uncharacterized protei	153785000	107920000	70622000	74281000	262510000	152540000	209510000	149910000	126570000	190410000	186230000	197440000
tr|Q544Y8|Q544Y8_MOUSE;tr|Q3UC19|Q3UC19_MOUSE;tr|Q3TX66|Q3TX66_MOUSE;tr|Q3TWT4|Q3TWT4_MOUSE;tr|Q3TVQ3|Q3TVQ3_MOUSE;sp|P28798|GRN_MOUSE;tr|Q3U9K2|Q3U9K2_MOUSE;tr|Q9D2V3|Q9D2V3_MOUSE;tr|Q3UD85|Q3UD85_MOUSE;tr|Q3UAJ3|Q3UAJ3_MOUSE;tr|Q3U9N4|Q3U9N4_MOUSE;tr|Q3U8W3|Q3U8W3_MOUSE;tr|Q3TW77|Q3TW77_MOUSE;tr|Q3UDD6|Q3UDD6_MOUSE;tr|Q3U5Q6|Q3U5Q6_MOUSE;tr|H3BLC9|H3BLC9_MOUSE;tr|H3BJE0|H3BJE0_MOUSE;tr|H3BJ90|H…	tr|Q544Y8|Q544Y8_MOUSE;tr|Q3UC19|Q3UC19_MOUSE;tr|Q3TX66|Q3TX66_MOUSE;tr|Q3TWT4|Q3TWT4_MOUSE;tr|Q3TVQ3|Q3TVQ3_MOUSE;sp|P28798|GRN_MOUSE;tr|Q3U9K2|Q3U9K2_MOUSE;tr|Q9D2V3|Q9D2V3_MOUSE;tr|Q3UD85|Q3UD85_MOUSE;tr|Q3UAJ3|Q3UAJ3_MOUSE;tr|Q3U9N4|Q3U9N4_MOUSE;tr|Q3U8W3|Q3U8W3_MOUSE;tr|Q3TW77|Q3TW77_MOUSE;tr|Q3UDD6|Q3UDD6_MOUSE;tr|Q3U5Q6|Q3U5Q6_MOUSE	tr|Q544Y8|Q544Y8_MOUSE Granulin OS=Mus musculus GN=Grn PE=2 SV=1;tr|Q3UC19|Q3UC19_MOUSE Uncharacterized protein OS=Mus musculus GN=Grn PE=2 SV=1;tr|Q3TX66|Q3TX66_MOUSE Uncharacterized protein OS=Mus musculus GN=Grn PE=2 SV=1;tr|Q3TWT4|Q3TWT4_MOUSE Uncharac	48229000	58069000	72718000	59532000	74202000	67741000	49755000	52714000	93919000	52824000	52981000	52558000
tr|Q545A2|Q545A2_MOUSE;sp|P51881|ADT2_MOUSE	tr|Q545A2|Q545A2_MOUSE;sp|P51881|ADT2_MOUSE	tr|Q545A2|Q545A2_MOUSE MCG11560 OS=Mus musculus GN=Slc25a5 PE=1 SV=1;sp|P51881|ADT2_MOUSE ADP/ATP translocase 2 OS=Mus musculus GN=Slc25a5 PE=1 SV=3						35517000
tr|Q545C7|Q545C7_MOUSE;sp|P50462|CSRP3_MOUSE;tr|A0A140LHC6|A0A140LHC6_MOUSE	tr|Q545C7|Q545C7_MOUSE;sp|P50462|CSRP3_MOUSE	tr|Q545C7|Q545C7_MOUSE Cysteine and glycine-rich protein 3 OS=Mus musculus GN=Csrp3 PE=1 SV=1;sp|P50462|CSRP3_MOUSE Cysteine and glycine-rich protein 3 OS=Mus musculus GN=Csrp3 PE=1 SV=1	76267500
tr|Q545F0|Q545F0_MOUSE;sp|P34884|MIF_MOUSE	tr|Q545F0|Q545F0_MOUSE;sp|P34884|MIF_MOUSE	tr|Q545F0|Q545F0_MOUSE MCG3124, isoform CRA_b OS=Mus musculus GN=Mif PE=1 SV=1;sp|P34884|MIF_MOUSE Macrophage migration inhibitory factor OS=Mus musculus GN=Mif PE=1 SV=2	305265000	117700000	115200000	98633000	204710000	150860000	251090000	107290000	128790000	203930000	228730000	185560000
tr|Q545G0|Q545G0_MOUSE;sp|Q9R1P1|PSB3_MOUSE;tr|D3YUM8|D3YUM8_MOUSE	tr|Q545G0|Q545G0_MOUSE;sp|Q9R1P1|PSB3_MOUSE	tr|Q545G0|Q545G0_MOUSE Proteasome subunit beta type OS=Mus musculus GN=Psmb3 PE=1 SV=1;sp|Q9R1P1|PSB3_MOUSE Proteasome subunit beta type-3 OS=Mus musculus GN=Psmb3 PE=1 SV=1						9420500	9778400
tr|Q545I6|Q545I6_MOUSE;sp|Q9WUU7|CATZ_MOUSE;tr|Q9ES94|Q9ES94_MOUSE	tr|Q545I6|Q545I6_MOUSE;sp|Q9WUU7|CATZ_MOUSE;tr|Q9ES94|Q9ES94_MOUSE	tr|Q545I6|Q545I6_MOUSE Cathepsin Z, isoform CRA_b OS=Mus musculus GN=Ctsz PE=1 SV=1;sp|Q9WUU7|CATZ_MOUSE Cathepsin Z OS=Mus musculus GN=Ctsz PE=1 SV=1;tr|Q9ES94|Q9ES94_MOUSE Cathepsin Z OS=Mus musculus GN=Ctsz PE=2 SV=1	114620000	128110000	169100000	144630000	77644000	103470000	94223000	115970000	298310000	170450000	158090000	145440000
tr|Q545I9|Q545I9_MOUSE;sp|P14069|S10A6_MOUSE	tr|Q545I9|Q545I9_MOUSE;sp|P14069|S10A6_MOUSE	tr|Q545I9|Q545I9_MOUSE Protein S100 OS=Mus musculus GN=S100a6 PE=1 SV=1;sp|P14069|S10A6_MOUSE Protein S100-A6 OS=Mus musculus GN=S100a6 PE=1 SV=3	356850000	69636000			186570000	55238000	123460000	53704000			123730000	88776000
tr|Q545J3|Q545J3_MOUSE;sp|Q9R098|HGFA_MOUSE;tr|Q8VCS4|Q8VCS4_MOUSE;tr|Q3TDU8|Q3TDU8_MOUSE;tr|A0A0J9YUY6|A0A0J9YUY6_MOUSE	tr|Q545J3|Q545J3_MOUSE;sp|Q9R098|HGFA_MOUSE;tr|Q8VCS4|Q8VCS4_MOUSE;tr|Q3TDU8|Q3TDU8_MOUSE	tr|Q545J3|Q545J3_MOUSE Uncharacterized protein OS=Mus musculus GN=Hgfac PE=2 SV=1;sp|Q9R098|HGFA_MOUSE Hepatocyte growth factor activator OS=Mus musculus GN=Hgfac PE=1 SV=1;tr|Q8VCS4|Q8VCS4_MOUSE Hepatocyte growth factor activator OS=Mus musculus GN=Hgfac	14641000
tr|Q545K7|Q545K7_MOUSE;sp|P30933|SVS5_MOUSE;tr|F6RYE9|F6RYE9_MOUSE	tr|Q545K7|Q545K7_MOUSE;sp|P30933|SVS5_MOUSE	tr|Q545K7|Q545K7_MOUSE Seminal vesicle secretion 5 OS=Mus musculus GN=Svs5 PE=2 SV=1;sp|P30933|SVS5_MOUSE Seminal vesicle secretory protein 5 OS=Mus musculus GN=Svs5 PE=2 SV=1					91535000	700970000	49048000
tr|Q545M7|Q545M7_MOUSE;sp|P32848|PRVA_MOUSE	tr|Q545M7|Q545M7_MOUSE;sp|P32848|PRVA_MOUSE	tr|Q545M7|Q545M7_MOUSE Parvalbumin, isoform CRA_a OS=Mus musculus GN=Pvalb PE=1 SV=1;sp|P32848|PRVA_MOUSE Parvalbumin alpha OS=Mus musculus GN=Pvalb PE=1 SV=3	4052850000	8266300000	9067800000	6104800000	6351100000	6216100000	6996600000	6598200000	7447400000	1755300000	3314600000	5811900000
tr|Q545P0|Q545P0_MOUSE;tr|Q3TV47|Q3TV47_MOUSE;tr|Q3TSQ1|Q3TSQ1_MOUSE;sp|P14094|AT1B1_MOUSE;tr|A0A0A6YX05|A0A0A6YX05_MOUSE;tr|Q3TRA6|Q3TRA6_MOUSE	tr|Q545P0|Q545P0_MOUSE;tr|Q3TV47|Q3TV47_MOUSE;tr|Q3TSQ1|Q3TSQ1_MOUSE;sp|P14094|AT1B1_MOUSE;tr|A0A0A6YX05|A0A0A6YX05_MOUSE;tr|Q3TRA6|Q3TRA6_MOUSE	tr|Q545P0|Q545P0_MOUSE Sodium/potassium-transporting ATPase subunit beta OS=Mus musculus GN=Atp1b1 PE=1 SV=1;tr|Q3TV47|Q3TV47_MOUSE Sodium/potassium-transporting ATPase subunit beta OS=Mus musculus GN=Atp1b1 PE=2 SV=1;tr|Q3TSQ1|Q3TSQ1_MOUSE Sodium/potassiu											18237000
tr|Q545T7|Q545T7_MOUSE;sp|P05977|MYL1_MOUSE;tr|Q545G5|Q545G5_MOUSE;tr|E9PWG4|E9PWG4_MOUSE;tr|Q6PCW9|Q6PCW9_MOUSE;tr|E0CZ30|E0CZ30_MOUSE;tr|A0A087WRZ7|A0A087WRZ7_MOUSE;tr|A0A0G2JDW2|A0A0G2JDW2_MOUSE;tr|A2A6Q8|A2A6Q8_MOUSE;tr|Q9CZ19|Q9CZ19_MOUSE;sp|P09541|MYL4_MOUSE;sp|P09542|MYL3_MOUSE	tr|Q545T7|Q545T7_MOUSE;sp|P05977|MYL1_MOUSE;tr|Q545G5|Q545G5_MOUSE;tr|E9PWG4|E9PWG4_MOUSE;tr|Q6PCW9|Q6PCW9_MOUSE;tr|E0CZ30|E0CZ30_MOUSE	tr|Q545T7|Q545T7_MOUSE MCG121569, isoform CRA_a OS=Mus musculus GN=Myl1 PE=2 SV=1;sp|P05977|MYL1_MOUSE Myosin light chain 1/3, skeletal muscle isoform OS=Mus musculus GN=Myl1 PE=1 SV=2;tr|Q545G5|Q545G5_MOUSE MCG121569, isoform CRA_b OS=Mus musculus GN=Myl1	369345000	159860000	119410000	74227000	251360000	346370000	288320000	103000000	156660000		155310000	109490000
tr|Q545V3|Q545V3_MOUSE;tr|Q3UJ20|Q3UJ20_MOUSE;sp|P17183|ENOG_MOUSE;tr|A0A0N4SUX5|A0A0N4SUX5_MOUSE;tr|D3Z6E4|D3Z6E4_MOUSE;tr|Q922A0|Q922A0_MOUSE;tr|D3Z2S4|D3Z2S4_MOUSE;tr|D3YVD3|D3YVD3_MOUSE;tr|A0A0N4SUI6|A0A0N4SUI6_MOUSE	tr|Q545V3|Q545V3_MOUSE;tr|Q3UJ20|Q3UJ20_MOUSE;sp|P17183|ENOG_MOUSE;tr|A0A0N4SUX5|A0A0N4SUX5_MOUSE;tr|D3Z6E4|D3Z6E4_MOUSE;tr|Q922A0|Q922A0_MOUSE	tr|Q545V3|Q545V3_MOUSE Enolase 2, gamma neuronal, isoform CRA_a OS=Mus musculus GN=Eno2 PE=1 SV=1;tr|Q3UJ20|Q3UJ20_MOUSE Uncharacterized protein OS=Mus musculus GN=Eno2 PE=2 SV=1;sp|P17183|ENOG_MOUSE Gamma-enolase OS=Mus musculus GN=Eno2 PE=1 SV=2;tr|A0A0N	29363000		23990000		166700000	64171000	51227000	61129000		283810000	237910000	108730000
tr|Q545V6|Q545V6_MOUSE;sp|P60041|SMS_MOUSE	tr|Q545V6|Q545V6_MOUSE;sp|P60041|SMS_MOUSE	tr|Q545V6|Q545V6_MOUSE Somatostatin OS=Mus musculus GN=Sst PE=2 SV=1;sp|P60041|SMS_MOUSE Somatostatin OS=Mus musculus GN=Sst PE=3 SV=1				82093000
tr|Q546G4|Q546G4_MOUSE;sp|P07724|ALBU_MOUSE;tr|K7R066|K7R066_MOUSE	tr|Q546G4|Q546G4_MOUSE;sp|P07724|ALBU_MOUSE	tr|Q546G4|Q546G4_MOUSE Albumin 1 OS=Mus musculus GN=Alb PE=1 SV=1;sp|P07724|ALBU_MOUSE Serum albumin OS=Mus musculus GN=Alb PE=1 SV=3	405845000000	594460000000	590670000000	676710000000	415610000000	390900000000	522640000000	646290000000	656970000000	497550000000	448760000000	526720000000
tr|Q547B5|Q547B5_MOUSE;sp|P10923|OSTP_MOUSE;tr|F8WIP8|F8WIP8_MOUSE;tr|Q3UZY3|Q3UZY3_MOUSE;tr|Q3UBR1|Q3UBR1_MOUSE;tr|Q3TND2|Q3TND2_MOUSE;tr|Q66JX3|Q66JX3_MOUSE;tr|Q3TLP1|Q3TLP1_MOUSE;tr|D3Z4N2|D3Z4N2_MOUSE;tr|D3Z513|D3Z513_MOUSE	tr|Q547B5|Q547B5_MOUSE;sp|P10923|OSTP_MOUSE;tr|F8WIP8|F8WIP8_MOUSE;tr|Q3UZY3|Q3UZY3_MOUSE;tr|Q3UBR1|Q3UBR1_MOUSE;tr|Q3TND2|Q3TND2_MOUSE	tr|Q547B5|Q547B5_MOUSE Osteopontin OS=Mus musculus GN=Spp1 PE=1 SV=1;sp|P10923|OSTP_MOUSE Osteopontin OS=Mus musculus GN=Spp1 PE=1 SV=1;tr|F8WIP8|F8WIP8_MOUSE Osteopontin OS=Mus musculus GN=Spp1 PE=1 SV=1;tr|Q3UZY3|Q3UZY3_MOUSE Uncharacterized protein OS=M	636770000	1267100000	1190500000	1115500000	488170000	1167400000	590090000	905290000	1080400000	482940000	590750000	956800000
tr|Q547V2|Q547V2_MOUSE;tr|D3Z7M4|D3Z7M4_MOUSE;tr|E9Q138|E9Q138_MOUSE;tr|E9PU89|E9PU89_MOUSE;tr|Q4VJC0|Q4VJC0_MOUSE;sp|P05017|IGF1_MOUSE;tr|Q4VJB9|Q4VJB9_MOUSE;tr|Q8CAR0|Q8CAR0_MOUSE	tr|Q547V2|Q547V2_MOUSE;tr|D3Z7M4|D3Z7M4_MOUSE;tr|E9Q138|E9Q138_MOUSE;tr|E9PU89|E9PU89_MOUSE;tr|Q4VJC0|Q4VJC0_MOUSE;sp|P05017|IGF1_MOUSE;tr|Q4VJB9|Q4VJB9_MOUSE;tr|Q8CAR0|Q8CAR0_MOUSE	tr|Q547V2|Q547V2_MOUSE Insulin-like growth factor 1 OS=Mus musculus GN=Igf1 PE=2 SV=1;tr|D3Z7M4|D3Z7M4_MOUSE Insulin-like growth factor I (Fragment) OS=Mus musculus GN=Igf1 PE=1 SV=1;tr|E9Q138|E9Q138_MOUSE Insulin-like growth factor I OS=Mus musculus GN=Ig				31577000
tr|Q548W7|Q548W7_MOUSE;tr|Q3ULV8|Q3ULV8_MOUSE;sp|P31786|ACBP_MOUSE;tr|M0QWU8|M0QWU8_MOUSE;tr|Q4VWZ5|Q4VWZ5_MOUSE;tr|D3Z563|D3Z563_MOUSE	tr|Q548W7|Q548W7_MOUSE;tr|Q3ULV8|Q3ULV8_MOUSE;sp|P31786|ACBP_MOUSE;tr|M0QWU8|M0QWU8_MOUSE;tr|Q4VWZ5|Q4VWZ5_MOUSE	tr|Q548W7|Q548W7_MOUSE Diazepam binding inhibitor OS=Mus musculus GN=Dbi PE=1 SV=1;tr|Q3ULV8|Q3ULV8_MOUSE Uncharacterized protein OS=Mus musculus GN=Dbi PE=2 SV=1;sp|P31786|ACBP_MOUSE Acyl-CoA-binding protein OS=Mus musculus GN=Dbi PE=1 SV=2;tr|M0QWU8|M0QW	531765000	229640000	303890000	183320000	350380000	264180000	349240000	207030000	263020000	282210000	344920000	317770000
tr|Q549A5|Q549A5_MOUSE;sp|Q06890|CLUS_MOUSE;tr|Q9JK98|Q9JK98_MOUSE;tr|E9PUU2|E9PUU2_MOUSE;tr|E9PXG5|E9PXG5_MOUSE;tr|E9Q8Y5|E9Q8Y5_MOUSE;tr|E9Q9B8|E9Q9B8_MOUSE;tr|E9Q2G2|E9Q2G2_MOUSE;tr|Q3V245|Q3V245_MOUSE	tr|Q549A5|Q549A5_MOUSE;sp|Q06890|CLUS_MOUSE;tr|Q9JK98|Q9JK98_MOUSE;tr|E9PUU2|E9PUU2_MOUSE;tr|E9PXG5|E9PXG5_MOUSE;tr|E9Q8Y5|E9Q8Y5_MOUSE;tr|E9Q9B8|E9Q9B8_MOUSE	tr|Q549A5|Q549A5_MOUSE Clusterin OS=Mus musculus GN=Clu PE=1 SV=1;sp|Q06890|CLUS_MOUSE Clusterin OS=Mus musculus GN=Clu PE=1 SV=1;tr|Q9JK98|Q9JK98_MOUSE Clusterin OS=Mus musculus GN=Clu PE=2 SV=1;tr|E9PUU2|E9PUU2_MOUSE Clusterin (Fragment) OS=Mus musculus	4649300000	8253900000	5914900000	10444000000	3756600000	7028700000	5585400000	5067600000	7091800000	3849400000	3540900000	4282500000
tr|Q54A77|Q54A77_MOUSE;tr|A2TJ61|A2TJ61_MOUSE;sp|Q8VCS0|PGRP2_MOUSE;tr|Q76L85|Q76L85_MOUSE;tr|Q71S36|Q71S36_MOUSE;tr|Q71S44|Q71S44_MOUSE;tr|Q71S45|Q71S45_MOUSE;CON__ENSEMBL:ENSBTAP00000016285	tr|Q54A77|Q54A77_MOUSE;tr|A2TJ61|A2TJ61_MOUSE;sp|Q8VCS0|PGRP2_MOUSE;tr|Q76L85|Q76L85_MOUSE;tr|Q71S36|Q71S36_MOUSE	tr|Q54A77|Q54A77_MOUSE TagL-alpha OS=Mus musculus GN=Pglyrp2 PE=2 SV=1;tr|A2TJ61|A2TJ61_MOUSE Peptidoglycan recognition protein 2 OS=Mus musculus GN=Pglyrp2 PE=2 SV=1;sp|Q8VCS0|PGRP2_MOUSE N-acetylmuramoyl-L-alanine amidase OS=Mus musculus GN=Pglyrp2 PE=1						24287000			36228000
tr|Q54AH9|Q54AH9_MOUSE;tr|Q549D9|Q549D9_MOUSE;tr|D4N6N9|D4N6N9_MUSMC;tr|D0U285|D0U285_MUSMC;tr|A8DV41|A8DV41_MOUSE;sp|P02089|HBB2_MOUSE;tr|Q9QUN8|Q9QUN8_MOUSE;tr|D4N6N2|D4N6N2_MUSMC;tr|D4N6M2|D4N6M2_MUSMC;tr|D0U293|D0U293_MOUSE;tr|D0U284|D0U284_MUSMC;tr|A8DV59|A8DV59_MOUSE	tr|Q54AH9|Q54AH9_MOUSE;tr|Q549D9|Q549D9_MOUSE;tr|D4N6N9|D4N6N9_MUSMC;tr|D0U285|D0U285_MUSMC;tr|A8DV41|A8DV41_MOUSE;sp|P02089|HBB2_MOUSE;tr|Q9QUN8|Q9QUN8_MOUSE;tr|D4N6N2|D4N6N2_MUSMC;tr|D4N6M2|D4N6M2_MUSMC;tr|D0U293|D0U293_MOUSE;tr|D0U284|D0U284_MUSMC;tr|A8DV59|A8DV59_MOUSE	tr|Q54AH9|Q54AH9_MOUSE Beta-2-globin (Fragment) OS=Mus musculus GN=Hbb-b2 PE=2 SV=1;tr|Q549D9|Q549D9_MOUSE Beta-globin OS=Mus musculus GN=Hbb-b2 PE=2 SV=1;tr|D4N6N9|D4N6N9_MUSMC Beta-globin OS=Mus musculus castaneus GN=Hbbt2 PE=3 SV=1;tr|D0U285|D0U285_MUSM								105510000
tr|Q561N4|Q561N4_MOUSE;sp|P68037|UB2L3_MOUSE;tr|D3YZS3|D3YZS3_MOUSE;tr|Q3TIH9|Q3TIH9_MOUSE	tr|Q561N4|Q561N4_MOUSE;sp|P68037|UB2L3_MOUSE	tr|Q561N4|Q561N4_MOUSE MCG1032217 OS=Mus musculus GN=Ube2l3 PE=1 SV=1;sp|P68037|UB2L3_MOUSE Ubiquitin-conjugating enzyme E2 L3 OS=Mus musculus GN=Ube2l3 PE=1 SV=1					43450000		28939000
tr|Q564E2|Q564E2_MOUSE;sp|P06151|LDHA_MOUSE;tr|Q3TI99|Q3TI99_MOUSE;tr|Q3TCI7|Q3TCI7_MOUSE;tr|A0A1B0GSX0|A0A1B0GSX0_MOUSE;tr|Q99K20|Q99K20_MOUSE;tr|A0A1B0GSR9|A0A1B0GSR9_MOUSE;tr|Q3UDU4|Q3UDU4_MOUSE;tr|Q3THB4|Q3THB4_MOUSE;tr|D3YZQ9|D3YZQ9_MOUSE;tr|A0A1B0GT41|A0A1B0GT41_MOUSE;tr|A0A1B0GQX5|A0A1B0GQX5_MOUSE;tr|A0A1B0GSL7|A0A1B0GSL7_MOUSE;tr|Q3UIC3|Q3UIC3_MOUSE;tr|Q6NXW3|Q6NXW3_MOUSE;tr|A0A1B0GRW9|A0…	tr|Q564E2|Q564E2_MOUSE;sp|P06151|LDHA_MOUSE;tr|Q3TI99|Q3TI99_MOUSE;tr|Q3TCI7|Q3TCI7_MOUSE;tr|A0A1B0GSX0|A0A1B0GSX0_MOUSE;tr|Q99K20|Q99K20_MOUSE;tr|A0A1B0GSR9|A0A1B0GSR9_MOUSE;tr|Q3UDU4|Q3UDU4_MOUSE;tr|Q3THB4|Q3THB4_MOUSE;tr|D3YZQ9|D3YZQ9_MOUSE;tr|A0A1B0GT41|A0A1B0GT41_MOUSE;tr|A0A1B0GQX5|A0A1B0GQX5_MOUSE	tr|Q564E2|Q564E2_MOUSE L-lactate dehydrogenase OS=Mus musculus GN=Ldha PE=1 SV=1;sp|P06151|LDHA_MOUSE L-lactate dehydrogenase A chain OS=Mus musculus GN=Ldha PE=1 SV=3;tr|Q3TI99|Q3TI99_MOUSE L-lactate dehydrogenase OS=Mus musculus GN=Ldha PE=2 SV=1;tr|Q3TC	4513750000	2285600000	1659600000	1176200000	2419000000	2255200000	2229200000	1234300000	1721400000	1660500000	3035800000	2573100000
tr|Q564F6|Q564F6_MOUSE;sp|P56812|PDCD5_MOUSE;tr|D3Z7Q5|D3Z7Q5_MOUSE	tr|Q564F6|Q564F6_MOUSE;sp|P56812|PDCD5_MOUSE;tr|D3Z7Q5|D3Z7Q5_MOUSE	tr|Q564F6|Q564F6_MOUSE MCG128907 OS=Mus musculus GN=Pdcd5 PE=1 SV=1;sp|P56812|PDCD5_MOUSE Programmed cell death protein 5 OS=Mus musculus GN=Pdcd5 PE=1 SV=3;tr|D3Z7Q5|D3Z7Q5_MOUSE Programmed cell death protein 5 OS=Mus musculus GN=Pdcd5 PE=1 SV=1	35352000						12542000			14475000	19656000
tr|Q566I6|Q566I6_MOUSE;sp|Q8CG16|C1RA_MOUSE;sp|Q8CFG9|C1RB_MOUSE	tr|Q566I6|Q566I6_MOUSE;sp|Q8CG16|C1RA_MOUSE;sp|Q8CFG9|C1RB_MOUSE	tr|Q566I6|Q566I6_MOUSE Complement component 1, r subcomponent OS=Mus musculus GN=C1ra PE=2 SV=1;sp|Q8CG16|C1RA_MOUSE Complement C1r-A subcomponent OS=Mus musculus GN=C1ra PE=1 SV=1;sp|Q8CFG9|C1RB_MOUSE Complement C1r-B subcomponent OS=Mus musculus GN=C1rb		8111600
tr|Q569Y6|Q569Y6_MOUSE;sp|Q9CZY3|UB2V1_MOUSE;tr|B7ZBY7|B7ZBY7_MOUSE;tr|E9PY39|E9PY39_MOUSE;tr|B7ZBY6|B7ZBY6_MOUSE;tr|Q4VBX4|Q4VBX4_MOUSE;sp|Q9D2M8|UB2V2_MOUSE;tr|B2KF55|B2KF55_MOUSE;tr|A6X925|A6X925_MOUSE	tr|Q569Y6|Q569Y6_MOUSE;sp|Q9CZY3|UB2V1_MOUSE;tr|B7ZBY7|B7ZBY7_MOUSE;tr|E9PY39|E9PY39_MOUSE;tr|B7ZBY6|B7ZBY6_MOUSE;tr|Q4VBX4|Q4VBX4_MOUSE;sp|Q9D2M8|UB2V2_MOUSE	tr|Q569Y6|Q569Y6_MOUSE Ubiquitin-conjugating enzyme E2 variant 1 OS=Mus musculus GN=Ube2v1 PE=2 SV=1;sp|Q9CZY3|UB2V1_MOUSE Ubiquitin-conjugating enzyme E2 variant 1 OS=Mus musculus GN=Ube2v1 PE=1 SV=1;tr|B7ZBY7|B7ZBY7_MOUSE Ubiquitin-conjugating enzyme E2	33379000				36723000		24000000
tr|Q56A15|Q56A15_MOUSE;sp|P62897|CYC_MOUSE;CON__P62894	tr|Q56A15|Q56A15_MOUSE;sp|P62897|CYC_MOUSE	tr|Q56A15|Q56A15_MOUSE Cytochrome c OS=Mus musculus GN=Cycs PE=1 SV=1;sp|P62897|CYC_MOUSE Cytochrome c, somatic OS=Mus musculus GN=Cycs PE=1 SV=2	248705000	220140000	243410000	198140000	251830000	157710000	248120000	206680000	180480000	118820000	186390000	192450000
tr|Q571D4|Q571D4_MOUSE;tr|Q3UU93|Q3UU93_MOUSE;tr|A3KN68|A3KN68_MOUSE;sp|P80560|PTPR2_MOUSE;tr|Q70FG5|Q70FG5_MOUSE	tr|Q571D4|Q571D4_MOUSE;tr|Q3UU93|Q3UU93_MOUSE;tr|A3KN68|A3KN68_MOUSE;sp|P80560|PTPR2_MOUSE	tr|Q571D4|Q571D4_MOUSE MKIAA0387 protein (Fragment) OS=Mus musculus GN=Ptprn2 PE=2 SV=1;tr|Q3UU93|Q3UU93_MOUSE Receptor-type tyrosine-protein phosphatase N2 OS=Mus musculus GN=Ptprn2 PE=1 SV=1;tr|A3KN68|A3KN68_MOUSE Protein tyrosine phosphatase, receptor t	104796000	242620000	225890000	280090000	140800000	225950000	161210000	146190000	230060000	118140000	135500000	162900000
tr|Q58E61|Q58E61_MOUSE;tr|Q4VAB6|Q4VAB6_MOUSE	tr|Q58E61|Q58E61_MOUSE;tr|Q4VAB6|Q4VAB6_MOUSE	tr|Q58E61|Q58E61_MOUSE Igh protein OS=Mus musculus GN=Igh PE=2 SV=1;tr|Q4VAB6|Q4VAB6_MOUSE Igh protein OS=Mus musculus GN=Igh PE=2 SV=1	294745000	107370000	407590000	100730000	62383000	90694000	158730000	238130000	95825000	178160000	161550000	122220000
tr|Q58E64|Q58E64_MOUSE;tr|Q3UA81|Q3UA81_MOUSE;sp|P10126|EF1A1_MOUSE;tr|Q3UZQ3|Q3UZQ3_MOUSE;tr|Q3TII3|Q3TII3_MOUSE;tr|D3YZ68|D3YZ68_MOUSE;tr|D3Z3I8|D3Z3I8_MOUSE;tr|Q4FZE5|Q4FZE5_MOUSE	tr|Q58E64|Q58E64_MOUSE;tr|Q3UA81|Q3UA81_MOUSE;sp|P10126|EF1A1_MOUSE;tr|Q3UZQ3|Q3UZQ3_MOUSE;tr|Q3TII3|Q3TII3_MOUSE;tr|D3YZ68|D3YZ68_MOUSE;tr|D3Z3I8|D3Z3I8_MOUSE	tr|Q58E64|Q58E64_MOUSE Elongation factor 1-alpha OS=Mus musculus GN=Eef1a1 PE=1 SV=1;tr|Q3UA81|Q3UA81_MOUSE Elongation factor 1-alpha OS=Mus musculus GN=Eef1a1 PE=2 SV=1;sp|P10126|EF1A1_MOUSE Elongation factor 1-alpha 1 OS=Mus musculus GN=Eef1a1 PE=1 SV=3;	56951500	44138000			134020000	97348000	119200000		62536000	66196000	56932000
tr|Q58EU7|Q58EU7_MOUSE;sp|Q00915|RET1_MOUSE	tr|Q58EU7|Q58EU7_MOUSE;sp|Q00915|RET1_MOUSE	tr|Q58EU7|Q58EU7_MOUSE Rbp1 protein OS=Mus musculus GN=Rbp1 PE=1 SV=1;sp|Q00915|RET1_MOUSE Retinol-binding protein 1 OS=Mus musculus GN=Rbp1 PE=1 SV=2					56019000	85037000			55225000	45075000	74931000	39132000
tr|Q58EU8|Q58EU8_MOUSE	tr|Q58EU8|Q58EU8_MOUSE	tr|Q58EU8|Q58EU8_MOUSE Igk protein OS=Mus musculus GN=Igk PE=1 SV=1											73189000
tr|Q5BLK0|Q5BLK0_MOUSE;tr|Q3TIQ2|Q3TIQ2_MOUSE;sp|P35979|RL12_MOUSE;tr|Q8C2K0|Q8C2K0_MOUSE;tr|Q6DI58|Q6DI58_MOUSE;tr|F8VQK7|F8VQK7_MOUSE	tr|Q5BLK0|Q5BLK0_MOUSE;tr|Q3TIQ2|Q3TIQ2_MOUSE;sp|P35979|RL12_MOUSE;tr|Q8C2K0|Q8C2K0_MOUSE;tr|Q6DI58|Q6DI58_MOUSE	tr|Q5BLK0|Q5BLK0_MOUSE MCG18564, isoform CRA_a OS=Mus musculus GN=Rpl12 PE=1 SV=1;tr|Q3TIQ2|Q3TIQ2_MOUSE Uncharacterized protein OS=Mus musculus GN=Rpl12 PE=2 SV=1;sp|P35979|RL12_MOUSE 60S ribosomal protein L12 OS=Mus musculus GN=Rpl12 PE=1 SV=2;tr|Q8C2K0|						18309000
tr|Q5DTK7|Q5DTK7_MOUSE;sp|Q7TSK2|SEZ6_MOUSE;tr|F6XNR8|F6XNR8_MOUSE	tr|Q5DTK7|Q5DTK7_MOUSE;sp|Q7TSK2|SEZ6_MOUSE;tr|F6XNR8|F6XNR8_MOUSE	tr|Q5DTK7|Q5DTK7_MOUSE MKIAA4158 protein (Fragment) OS=Mus musculus GN=Sez6 PE=2 SV=1;sp|Q7TSK2|SEZ6_MOUSE Seizure protein 6 OS=Mus musculus GN=Sez6 PE=1 SV=1;tr|F6XNR8|F6XNR8_MOUSE Seizure protein 6 (Fragment) OS=Mus musculus GN=Sez6 PE=1 SV=1		14671000
tr|Q5DTQ6|Q5DTQ6_MOUSE;sp|Q8C9W3|ATS2_MOUSE	tr|Q5DTQ6|Q5DTQ6_MOUSE;sp|Q8C9W3|ATS2_MOUSE	tr|Q5DTQ6|Q5DTQ6_MOUSE MKIAA4060 protein (Fragment) OS=Mus musculus GN=Adamts2 PE=2 SV=1;sp|Q8C9W3|ATS2_MOUSE A disintegrin and metalloproteinase with thrombospondin motifs 2 OS=Mus musculus GN=Adamts2 PE=1 SV=2		9515400
tr|Q5EBJ0|Q5EBJ0_MOUSE;sp|P11404|FABPH_MOUSE	tr|Q5EBJ0|Q5EBJ0_MOUSE;sp|P11404|FABPH_MOUSE	tr|Q5EBJ0|Q5EBJ0_MOUSE Fatty acid binding protein 3, muscle and heart OS=Mus musculus GN=Fabp3 PE=1 SV=1;sp|P11404|FABPH_MOUSE Fatty acid-binding protein, heart OS=Mus musculus GN=Fabp3 PE=1 SV=5	3513150000	2053200000	1263300000	999450000	2544500000	2817200000	2903100000	1632400000	1360000000	1152400000	3268300000	3222100000
tr|Q5EBQ2|Q5EBQ2_MOUSE;tr|Q3TGC5|Q3TGC5_MOUSE;sp|P70296|PEBP1_MOUSE;tr|D3Z1V4|D3Z1V4_MOUSE;tr|D6RHS6|D6RHS6_MOUSE	tr|Q5EBQ2|Q5EBQ2_MOUSE;tr|Q3TGC5|Q3TGC5_MOUSE;sp|P70296|PEBP1_MOUSE;tr|D3Z1V4|D3Z1V4_MOUSE;tr|D6RHS6|D6RHS6_MOUSE	tr|Q5EBQ2|Q5EBQ2_MOUSE MCG7941, isoform CRA_f OS=Mus musculus GN=Pebp1 PE=1 SV=1;tr|Q3TGC5|Q3TGC5_MOUSE Uncharacterized protein OS=Mus musculus GN=Pebp1 PE=2 SV=1;sp|P70296|PEBP1_MOUSE Phosphatidylethanolamine-binding protein 1 OS=Mus musculus GN=Pebp1 PE=	1489900000	870670000	717430000	688820000	1299300000	926750000	1216500000	896610000	724370000	876510000	1010000000	1185600000
tr|Q5F1Z8|Q5F1Z8_MOUSE;sp|Q60648|SAP3_MOUSE	tr|Q5F1Z8|Q5F1Z8_MOUSE;sp|Q60648|SAP3_MOUSE	tr|Q5F1Z8|Q5F1Z8_MOUSE GM2 ganglioside activator protein OS=Mus musculus GN=Gm2a PE=1 SV=1;sp|Q60648|SAP3_MOUSE Ganglioside GM2 activator OS=Mus musculus GN=Gm2a PE=1 SV=2	353790000	515620000	444170000	712930000	337680000	565150000	453720000	374330000	299840000	259540000	350540000	325790000
tr|Q5FW62|Q5FW62_MOUSE;sp|P49182|HEP2_MOUSE;CON__ENSEMBL:ENSBTAP00000018574	tr|Q5FW62|Q5FW62_MOUSE;sp|P49182|HEP2_MOUSE	tr|Q5FW62|Q5FW62_MOUSE Serine (Or cysteine) peptidase inhibitor, clade D, member 1 OS=Mus musculus GN=Serpind1 PE=2 SV=1;sp|P49182|HEP2_MOUSE Heparin cofactor 2 OS=Mus musculus GN=Serpind1 PE=1 SV=1	143775000	241830000	191450000	188130000	181790000	179980000	187170000	201320000	198450000	168300000	142040000	188350000
tr|Q5FW97|Q5FW97_MOUSE;sp|P17182|ENOA_MOUSE;tr|Q6PHC1|Q6PHC1_MOUSE;tr|Q8CF78|Q8CF78_MOUSE;tr|B1ARR7|B1ARR7_MOUSE;tr|B1ARR6|B1ARR6_MOUSE;tr|A0A0N4SUW8|A0A0N4SUW8_MOUSE	tr|Q5FW97|Q5FW97_MOUSE;sp|P17182|ENOA_MOUSE;tr|Q6PHC1|Q6PHC1_MOUSE	tr|Q5FW97|Q5FW97_MOUSE Enolase 1, alpha non-neuron OS=Mus musculus GN=EG433182 PE=1 SV=1;sp|P17182|ENOA_MOUSE Alpha-enolase OS=Mus musculus GN=Eno1 PE=1 SV=3;tr|Q6PHC1|Q6PHC1_MOUSE Alpha-enolase OS=Mus musculus GN=Eno1 PE=1 SV=1	1157000000	754840000	674640000	510080000	1205300000	988050000	1076300000	783860000	883000000	884830000	1211000000	950470000
tr|Q5FWA0|Q5FWA0_MOUSE;sp|C0HKG6|RNT2B_MOUSE;sp|C0HKG5|RNT2A_MOUSE	tr|Q5FWA0|Q5FWA0_MOUSE;sp|C0HKG6|RNT2B_MOUSE;sp|C0HKG5|RNT2A_MOUSE	tr|Q5FWA0|Q5FWA0_MOUSE Ribonuclease T2B OS=Mus musculus GN=Rnaset2b PE=1 SV=1;sp|C0HKG6|RNT2B_MOUSE Ribonuclease T2-B OS=Mus musculus GN=Rnaset2b PE=1 SV=1;sp|C0HKG5|RNT2A_MOUSE Ribonuclease T2-A OS=Mus musculus GN=Rnaset2a PE=1 SV=1		22639000		23126000	17379000		19026000					17312000
tr|Q5FWB7|Q5FWB7_MOUSE;sp|P05064|ALDOA_MOUSE;tr|Q6NY00|Q6NY00_MOUSE;tr|A6ZI44|A6ZI44_MOUSE;tr|D3YWI1|D3YWI1_MOUSE;tr|A0A0U1RPN8|A0A0U1RPN8_MOUSE;tr|D3Z510|D3Z510_MOUSE;tr|D3YV98|D3YV98_MOUSE;tr|A0A0U1RPT5|A0A0U1RPT5_MOUSE;tr|A6ZI47|A6ZI47_MOUSE	tr|Q5FWB7|Q5FWB7_MOUSE;sp|P05064|ALDOA_MOUSE;tr|Q6NY00|Q6NY00_MOUSE;tr|A6ZI44|A6ZI44_MOUSE;tr|D3YWI1|D3YWI1_MOUSE;tr|A0A0U1RPN8|A0A0U1RPN8_MOUSE	tr|Q5FWB7|Q5FWB7_MOUSE Fructose-bisphosphate aldolase OS=Mus musculus GN=Aldoa PE=1 SV=1;sp|P05064|ALDOA_MOUSE Fructose-bisphosphate aldolase A OS=Mus musculus GN=Aldoa PE=1 SV=2;tr|Q6NY00|Q6NY00_MOUSE Fructose-bisphosphate aldolase OS=Mus musculus GN=Aldo	32014000000	20552000000	10627000000	8440300000	15611000000	16697000000	20689000000	8750800000	8631800000	9926400000	18775000000	14830000000
tr|Q5FWJ3|Q5FWJ3_MOUSE;tr|Q3U6S1|Q3U6S1_MOUSE;sp|P20152|VIME_MOUSE;tr|Q3V2S4|Q3V2S4_MOUSE;tr|Q3TFD9|Q3TFD9_MOUSE;tr|A0A0A6YWC8|A0A0A6YWC8_MOUSE;tr|Q3TWV0|Q3TWV0_MOUSE;tr|Q3UD36|Q3UD36_MOUSE;tr|Q3UAX1|Q3UAX1_MOUSE;tr|A4IF59|A4IF59_MOUSE;tr|A2AKJ2|A2AKJ2_MOUSE;tr|G5E846|G5E846_MOUSE;sp|P15331|PERI_MOUSE;tr|G3X981|G3X981_MOUSE	tr|Q5FWJ3|Q5FWJ3_MOUSE;tr|Q3U6S1|Q3U6S1_MOUSE;sp|P20152|VIME_MOUSE;tr|Q3V2S4|Q3V2S4_MOUSE;tr|Q3TFD9|Q3TFD9_MOUSE;tr|A0A0A6YWC8|A0A0A6YWC8_MOUSE;tr|Q3TWV0|Q3TWV0_MOUSE;tr|Q3UD36|Q3UD36_MOUSE;tr|Q3UAX1|Q3UAX1_MOUSE	tr|Q5FWJ3|Q5FWJ3_MOUSE Vimentin OS=Mus musculus GN=Vim PE=1 SV=1;tr|Q3U6S1|Q3U6S1_MOUSE Uncharacterized protein OS=Mus musculus GN=Vim PE=2 SV=1;sp|P20152|VIME_MOUSE Vimentin OS=Mus musculus GN=Vim PE=1 SV=3;tr|Q3V2S4|Q3V2S4_MOUSE Uncharacterized protein O	1152450000	936410000	324320000	622870000	2289200000	1732500000	1891000000	803990000	675770000	533680000	752800000	675370000
tr|Q5I0W0|Q5I0W0_MOUSE;tr|Q3UF04|Q3UF04_MOUSE;tr|Q3TJD4|Q3TJD4_MOUSE;sp|Q9CQQ7|AT5F1_MOUSE;tr|A0A0G2JGX3|A0A0G2JGX3_MOUSE;tr|Q64218|Q64218_MOUSE	tr|Q5I0W0|Q5I0W0_MOUSE;tr|Q3UF04|Q3UF04_MOUSE;tr|Q3TJD4|Q3TJD4_MOUSE;sp|Q9CQQ7|AT5F1_MOUSE;tr|A0A0G2JGX3|A0A0G2JGX3_MOUSE	tr|Q5I0W0|Q5I0W0_MOUSE ATP synthase, H+ transporting, mitochondrial F0 complex, subunit b, isoform 1 OS=Mus musculus GN=Atp5f1 PE=1 SV=1;tr|Q3UF04|Q3UF04_MOUSE Uncharacterized protein OS=Mus musculus GN=Atp5f1 PE=2 SV=1;tr|Q3TJD4|Q3TJD4_MOUSE Uncharacteriz					87343000		51693000
tr|Q5M8Q0|Q5M8Q0_MOUSE;tr|Q3U7D2|Q3U7D2_MOUSE;tr|E9QAZ2|E9QAZ2_MOUSE;sp|Q9CZM2|RL15_MOUSE;tr|B8JKK2|B8JKK2_MOUSE	tr|Q5M8Q0|Q5M8Q0_MOUSE;tr|Q3U7D2|Q3U7D2_MOUSE;tr|E9QAZ2|E9QAZ2_MOUSE;sp|Q9CZM2|RL15_MOUSE	tr|Q5M8Q0|Q5M8Q0_MOUSE Ribosomal protein L15 OS=Mus musculus GN=Rpl15 PE=2 SV=1;tr|Q3U7D2|Q3U7D2_MOUSE Ribosomal protein L15 OS=Mus musculus GN=Rpl15 PE=2 SV=1;tr|E9QAZ2|E9QAZ2_MOUSE Ribosomal protein L15 OS=Mus musculus GN=Gm10020 PE=3 SV=1;sp|Q9CZM2|RL15						28690000
tr|Q5M8R8|Q5M8R8_MOUSE;tr|Q5FWB6|Q5FWB6_MOUSE;sp|P14869|RLA0_MOUSE;tr|D3YVM5|D3YVM5_MOUSE	tr|Q5M8R8|Q5M8R8_MOUSE;tr|Q5FWB6|Q5FWB6_MOUSE;sp|P14869|RLA0_MOUSE;tr|D3YVM5|D3YVM5_MOUSE	tr|Q5M8R8|Q5M8R8_MOUSE 60S acidic ribosomal protein P0 OS=Mus musculus GN=Rplp0 PE=2 SV=1;tr|Q5FWB6|Q5FWB6_MOUSE 60S acidic ribosomal protein P0 OS=Mus musculus GN=Rplp0 PE=2 SV=1;sp|P14869|RLA0_MOUSE 60S acidic ribosomal protein P0 OS=Mus musculus GN=Rplp					20206000	23480000
tr|Q5M9K1|Q5M9K1_MOUSE;sp|P07309|TTHY_MOUSE;tr|Q9D6A4|Q9D6A4_MOUSE	tr|Q5M9K1|Q5M9K1_MOUSE;sp|P07309|TTHY_MOUSE;tr|Q9D6A4|Q9D6A4_MOUSE	tr|Q5M9K1|Q5M9K1_MOUSE Transthyretin OS=Mus musculus GN=Ttr PE=1 SV=1;sp|P07309|TTHY_MOUSE Transthyretin OS=Mus musculus GN=Ttr PE=1 SV=1;tr|Q9D6A4|Q9D6A4_MOUSE Transthyretin OS=Mus musculus GN=Ttr PE=2 SV=1	6414700000	20450000000	20668000000	22948000000	9387600000	11365000000	11262000000	14121000000	15571000000	8980600000	10009000000	12817000000
tr|Q5M9P7|Q5M9P7_MOUSE;sp|Q9CR86|CHSP1_MOUSE;tr|Q3UD53|Q3UD53_MOUSE;tr|Q3U434|Q3U434_MOUSE	tr|Q5M9P7|Q5M9P7_MOUSE;sp|Q9CR86|CHSP1_MOUSE;tr|Q3UD53|Q3UD53_MOUSE;tr|Q3U434|Q3U434_MOUSE	tr|Q5M9P7|Q5M9P7_MOUSE Calcium regulated heat stable protein 1 OS=Mus musculus GN=Carhsp1 PE=1 SV=1;sp|Q9CR86|CHSP1_MOUSE Calcium-regulated heat stable protein 1 OS=Mus musculus GN=Carhsp1 PE=1 SV=1;tr|Q3UD53|Q3UD53_MOUSE Uncharacterized protein OS=Mus mus	20057000									18323000		18296000
tr|Q5NC81|Q5NC81_MOUSE;sp|P15532|NDKA_MOUSE;tr|Q5NC80|Q5NC80_MOUSE	tr|Q5NC81|Q5NC81_MOUSE;sp|P15532|NDKA_MOUSE;tr|Q5NC80|Q5NC80_MOUSE	tr|Q5NC81|Q5NC81_MOUSE Nucleoside diphosphate kinase OS=Mus musculus GN=Nme1 PE=1 SV=1;sp|P15532|NDKA_MOUSE Nucleoside diphosphate kinase A OS=Mus musculus GN=Nme1 PE=1 SV=1;tr|Q5NC80|Q5NC80_MOUSE Nucleoside diphosphate kinase (Fragment) OS=Mus musculus GN		19440000			38693000	23589000		29744000		35698000	34500000	38848000
tr|Q5NC82|Q5NC82_MOUSE;sp|Q01768|NDKB_MOUSE;tr|E9PZF0|E9PZF0_MOUSE;tr|B0LAA8|B0LAA8_MOUSE;tr|Q8R4B4|Q8R4B4_MOUSE;tr|Q5NC79|Q5NC79_MOUSE	tr|Q5NC82|Q5NC82_MOUSE;sp|Q01768|NDKB_MOUSE;tr|E9PZF0|E9PZF0_MOUSE;tr|B0LAA8|B0LAA8_MOUSE;tr|Q8R4B4|Q8R4B4_MOUSE	tr|Q5NC82|Q5NC82_MOUSE Nucleoside diphosphate kinase OS=Mus musculus GN=Nme2 PE=2 SV=1;sp|Q01768|NDKB_MOUSE Nucleoside diphosphate kinase B OS=Mus musculus GN=Nme2 PE=1 SV=1;tr|E9PZF0|E9PZF0_MOUSE Nucleoside diphosphate kinase OS=Mus musculus GN=Gm20390 PE	1251350000	596680000	427370000	214440000	637940000	603980000	783990000	434950000	327520000	510170000	687860000	608000000
tr|Q5NCI4|Q5NCI4_MOUSE;sp|O70250|PGAM2_MOUSE	tr|Q5NCI4|Q5NCI4_MOUSE;sp|O70250|PGAM2_MOUSE	tr|Q5NCI4|Q5NCI4_MOUSE Phosphoglycerate mutase OS=Mus musculus GN=Pgam2 PE=1 SV=1;sp|O70250|PGAM2_MOUSE Phosphoglycerate mutase 2 OS=Mus musculus GN=Pgam2 PE=1 SV=3	5284600000	3147800000	2051300000	1540000000	3034900000	2450500000	3901300000	1661200000	1713800000	1509600000	3465600000	3373800000
tr|Q5NCJ9|Q5NCJ9_MOUSE;sp|Q8R1I1|QCR9_MOUSE	tr|Q5NCJ9|Q5NCJ9_MOUSE;sp|Q8R1I1|QCR9_MOUSE	tr|Q5NCJ9|Q5NCJ9_MOUSE RIKEN cDNA 1110020P15, isoform CRA_b OS=Mus musculus GN=Uqcr10 PE=1 SV=1;sp|Q8R1I1|QCR9_MOUSE Cytochrome b-c1 complex subunit 9 OS=Mus musculus GN=Uqcr10 PE=1 SV=1						48222000
tr|Q5NCU4|Q5NCU4_MOUSE;tr|Q5NCU5|Q5NCU5_MOUSE;sp|P07214|SPRC_MOUSE;tr|A0A1L1SSH9|A0A1L1SSH9_MOUSE;tr|Q3TXI6|Q3TXI6_MOUSE;tr|Q5NCU3|Q5NCU3_MOUSE	tr|Q5NCU4|Q5NCU4_MOUSE;tr|Q5NCU5|Q5NCU5_MOUSE;sp|P07214|SPRC_MOUSE;tr|A0A1L1SSH9|A0A1L1SSH9_MOUSE;tr|Q3TXI6|Q3TXI6_MOUSE	tr|Q5NCU4|Q5NCU4_MOUSE SPARC OS=Mus musculus GN=Sparc PE=1 SV=1;tr|Q5NCU5|Q5NCU5_MOUSE Sparc protein OS=Mus musculus GN=Sparc PE=1 SV=1;sp|P07214|SPRC_MOUSE SPARC OS=Mus musculus GN=Sparc PE=1 SV=1;tr|A0A1L1SSH9|A0A1L1SSH9_MOUSE SPARC OS=Mus musculus GN=Sp	104203000	214500000	202720000	260910000	143350000	207610000	147630000	157260000	169770000		121130000	190120000
tr|Q5ND36|Q5ND36_MOUSE;sp|Q61247|A2AP_MOUSE;tr|Q5ND35|Q5ND35_MOUSE;tr|E9PXE0|E9PXE0_MOUSE	tr|Q5ND36|Q5ND36_MOUSE;sp|Q61247|A2AP_MOUSE;tr|Q5ND35|Q5ND35_MOUSE	tr|Q5ND36|Q5ND36_MOUSE Serine (Or cysteine) peptidase inhibitor, clade F, member 2, isoform CRA_c OS=Mus musculus GN=Serpinf2 PE=1 SV=1;sp|Q61247|A2AP_MOUSE Alpha-2-antiplasmin OS=Mus musculus GN=Serpinf2 PE=1 SV=1;tr|Q5ND35|Q5ND35_MOUSE Alpha-2-antiplasmi	232960000	243860000	282970000	225690000	229040000	250240000	208780000	351990000	328340000	280060000	226370000	268730000
tr|Q5RJV4|Q5RJV4_MOUSE;sp|Q9D0F9|PGM1_MOUSE;tr|Q7TNU0|Q7TNU0_MOUSE;tr|Q66JR7|Q66JR7_MOUSE;tr|Q3U6X6|Q3U6X6_MOUSE;tr|A2CEK3|A2CEK3_MOUSE;tr|Q99JW6|Q99JW6_MOUSE;tr|B0LAB9|B0LAB9_MOUSE	tr|Q5RJV4|Q5RJV4_MOUSE;sp|Q9D0F9|PGM1_MOUSE;tr|Q7TNU0|Q7TNU0_MOUSE;tr|Q66JR7|Q66JR7_MOUSE;tr|Q3U6X6|Q3U6X6_MOUSE;tr|A2CEK3|A2CEK3_MOUSE	tr|Q5RJV4|Q5RJV4_MOUSE Phosphoglucomutase 2 OS=Mus musculus GN=Pgm2 PE=2 SV=1;sp|Q9D0F9|PGM1_MOUSE Phosphoglucomutase-1 OS=Mus musculus GN=Pgm1 PE=1 SV=4;tr|Q7TNU0|Q7TNU0_MOUSE Pgm2 protein (Fragment) OS=Mus musculus GN=Pgm2 PE=2 SV=1;tr|Q66JR7|Q66JR7_MOUS	2095500000	839330000	699570000	466250000	1168700000	878530000	1402400000	582070000	726420000	814600000	1273100000	1333100000
tr|Q5SS40|Q5SS40_MOUSE;sp|P62259|1433E_MOUSE;tr|Q8BPH1|Q8BPH1_MOUSE;tr|F6WA09|F6WA09_MOUSE;tr|D6REF3|D6REF3_MOUSE;tr|Q3V453|Q3V453_MOUSE	tr|Q5SS40|Q5SS40_MOUSE;sp|P62259|1433E_MOUSE;tr|Q8BPH1|Q8BPH1_MOUSE;tr|F6WA09|F6WA09_MOUSE;tr|D6REF3|D6REF3_MOUSE	tr|Q5SS40|Q5SS40_MOUSE Tyrosine 3-monooxygenase/tryptophan 5-monooxygenase activation protein, epsilon polypeptide, isoform CRA_c OS=Mus musculus GN=Ywhae PE=1 SV=1;sp|P62259|1433E_MOUSE 14-3-3 protein epsilon OS=Mus musculus GN=Ywhae PE=1 SV=1;tr|Q8BPH1|Q	350240000	200240000	118140000	113010000	334960000	259240000	267300000	175780000	143100000	211360000	344850000	237780000
tr|Q5SUC3|Q5SUC3_MOUSE;tr|Q3TXE5|Q3TXE5_MOUSE;sp|P35564|CALX_MOUSE	tr|Q5SUC3|Q5SUC3_MOUSE;tr|Q3TXE5|Q3TXE5_MOUSE;sp|P35564|CALX_MOUSE	tr|Q5SUC3|Q5SUC3_MOUSE Calnexin, isoform CRA_a OS=Mus musculus GN=Canx PE=1 SV=1;tr|Q3TXE5|Q3TXE5_MOUSE Uncharacterized protein OS=Mus musculus GN=Canx PE=2 SV=1;sp|P35564|CALX_MOUSE Calnexin OS=Mus musculus GN=Canx PE=1 SV=1					16149000	16329000
tr|Q5SW18|Q5SW18_MOUSE;tr|Q3UGR6|Q3UGR6_MOUSE;tr|Q3TJG1|Q3TJG1_MOUSE;tr|Q3TIK0|Q3TIK0_MOUSE;sp|P63005|LIS1_MOUSE;tr|Q3UHM0|Q3UHM0_MOUSE;tr|Q3UH92|Q3UH92_MOUSE	tr|Q5SW18|Q5SW18_MOUSE;tr|Q3UGR6|Q3UGR6_MOUSE;tr|Q3TJG1|Q3TJG1_MOUSE;tr|Q3TIK0|Q3TIK0_MOUSE;sp|P63005|LIS1_MOUSE;tr|Q3UHM0|Q3UHM0_MOUSE;tr|Q3UH92|Q3UH92_MOUSE	tr|Q5SW18|Q5SW18_MOUSE Platelet-activating factor acetylhydrolase IB subunit alpha OS=Mus musculus GN=Pafah1b1 PE=2 SV=1;tr|Q3UGR6|Q3UGR6_MOUSE Platelet-activating factor acetylhydrolase IB subunit alpha OS=Mus musculus GN=Pafah1b1 PE=2 SV=1;tr|Q3TJG1|Q3TJ	13713000
tr|Q5SW87|Q5SW87_MOUSE;tr|Q5SW88|Q5SW88_MOUSE;tr|Q3UB66|Q3UB66_MOUSE;tr|Q0PD67|Q0PD67_MOUSE;sp|P62821|RAB1A_MOUSE;tr|Q6ZPF0|Q6ZPF0_MOUSE;tr|Q5SW86|Q5SW86_MOUSE;tr|Q0PD66|Q0PD66_MOUSE;sp|Q9D1G1|RAB1B_MOUSE;tr|Q3V3C2|Q3V3C2_MOUSE	tr|Q5SW87|Q5SW87_MOUSE;tr|Q5SW88|Q5SW88_MOUSE;tr|Q3UB66|Q3UB66_MOUSE;tr|Q0PD67|Q0PD67_MOUSE;sp|P62821|RAB1A_MOUSE;tr|Q6ZPF0|Q6ZPF0_MOUSE;tr|Q5SW86|Q5SW86_MOUSE;tr|Q0PD66|Q0PD66_MOUSE;sp|Q9D1G1|RAB1B_MOUSE	tr|Q5SW87|Q5SW87_MOUSE RAB1A, member RAS oncogene family OS=Mus musculus GN=Rab1a PE=1 SV=1;tr|Q5SW88|Q5SW88_MOUSE RAB1A, member RAS oncogene family OS=Mus musculus GN=Rab1a PE=1 SV=1;tr|Q3UB66|Q3UB66_MOUSE Uncharacterized protein OS=Mus musculus GN=Rab1a						5801200
tr|Q5SVY2|Q5SVY2_MOUSE;tr|Q3UAJ1|Q3UAJ1_MOUSE;tr|Q3TE63|Q3TE63_MOUSE;sp|P17742|PPIA_MOUSE;tr|Q9CZK9|Q9CZK9_MOUSE;tr|A0A1L1SST0|A0A1L1SST0_MOUSE;tr|F8VPN3|F8VPN3_MOUSE;tr|V9GXC1|V9GXC1_MOUSE;tr|V9GX31|V9GX31_MOUSE;tr|A0A1L1SRX5|A0A1L1SRX5_MOUSE	tr|Q5SVY2|Q5SVY2_MOUSE;tr|Q3UAJ1|Q3UAJ1_MOUSE;tr|Q3TE63|Q3TE63_MOUSE;sp|P17742|PPIA_MOUSE;tr|Q9CZK9|Q9CZK9_MOUSE;tr|A0A1L1SST0|A0A1L1SST0_MOUSE	tr|Q5SVY2|Q5SVY2_MOUSE Peptidyl-prolyl cis-trans isomerase OS=Mus musculus GN=Ppia PE=1 SV=1;tr|Q3UAJ1|Q3UAJ1_MOUSE Peptidyl-prolyl cis-trans isomerase OS=Mus musculus GN=Ppia PE=2 SV=1;tr|Q3TE63|Q3TE63_MOUSE Peptidyl-prolyl cis-trans isomerase OS=Mus musc	1025690000	680030000	639450000	605810000	1630100000	829270000	1343500000	847810000	916240000	935460000	1116900000	1187700000
tr|Q5SZA3|Q5SZA3_MOUSE;sp|P15864|H12_MOUSE;sp|Q07133|H1T_MOUSE;tr|I7HFT9|I7HFT9_MOUSE	tr|Q5SZA3|Q5SZA3_MOUSE;sp|P15864|H12_MOUSE;sp|Q07133|H1T_MOUSE;tr|I7HFT9|I7HFT9_MOUSE	tr|Q5SZA3|Q5SZA3_MOUSE Histone cluster 1, H1c OS=Mus musculus GN=Hist1h1c PE=1 SV=1;sp|P15864|H12_MOUSE Histone H1.2 OS=Mus musculus GN=Hist1h1c PE=1 SV=2;sp|Q07133|H1T_MOUSE Histone H1t OS=Mus musculus GN=Hist1h1t PE=1 SV=4;tr|I7HFT9|I7HFT9_MOUSE Histone									21594000
tr|Q5U415|Q5U415_MOUSE;tr|Q3UDY1|Q3UDY1_MOUSE;sp|P45376|ALDR_MOUSE;tr|Q3TCL2|Q3TCL2_MOUSE;tr|D3YVJ7|D3YVJ7_MOUSE;tr|Q3ULP0|Q3ULP0_MOUSE	tr|Q5U415|Q5U415_MOUSE;tr|Q3UDY1|Q3UDY1_MOUSE;sp|P45376|ALDR_MOUSE;tr|Q3TCL2|Q3TCL2_MOUSE	tr|Q5U415|Q5U415_MOUSE Aldo-keto reductase family 1, member B3 (Aldose reductase) OS=Mus musculus GN=Akr1b3 PE=2 SV=1;tr|Q3UDY1|Q3UDY1_MOUSE MCG6067, isoform CRA_b OS=Mus musculus GN=Akr1b3 PE=1 SV=1;sp|P45376|ALDR_MOUSE Aldose reductase OS=Mus musculus GN	1103300000	593270000	584950000	373750000	801580000	542610000	772980000	511260000	587940000	458030000	720860000	738020000
tr|Q5UCA9|Q5UCA9_MOUSE;tr|Q8C7E4|Q8C7E4_MOUSE;tr|Q6NXX2|Q6NXX2_MOUSE;sp|Q9JJH1|RNAS4_MOUSE;tr|Q8C663|Q8C663_MOUSE	tr|Q5UCA9|Q5UCA9_MOUSE;tr|Q8C7E4|Q8C7E4_MOUSE;tr|Q6NXX2|Q6NXX2_MOUSE;sp|Q9JJH1|RNAS4_MOUSE;tr|Q8C663|Q8C663_MOUSE	tr|Q5UCA9|Q5UCA9_MOUSE Ribonuclease 4 OS=Mus musculus GN=Rnase4 PE=2 SV=1;tr|Q8C7E4|Q8C7E4_MOUSE Ribonuclease 4 OS=Mus musculus GN=Rnase4 PE=1 SV=1;tr|Q6NXX2|Q6NXX2_MOUSE Rnase4 protein OS=Mus musculus GN=Rnase4 PE=2 SV=1;sp|Q9JJH1|RNAS4_MOUSE Ribonuclease	117185000	187830000	177520000	192260000	164790000	160480000	169190000	161790000	199900000	111320000	115370000	127160000
tr|Q61405|Q61405_MOUSE;tr|Q4LDF6|Q4LDF6_MOUSE	tr|Q61405|Q61405_MOUSE;tr|Q4LDF6|Q4LDF6_MOUSE	tr|Q61405|Q61405_MOUSE Complement factor H-related 2 OS=Mus musculus GN=Cfhr2 PE=1 SV=1;tr|Q4LDF6|Q4LDF6_MOUSE Complement factor H-related 2 OS=Mus musculus GN=Cfhr2 PE=1 SV=1									11930000
tr|Q61406|Q61406_MOUSE	tr|Q61406|Q61406_MOUSE	tr|Q61406|Q61406_MOUSE Complement factor H-related 1 OS=Mus musculus GN=Cfhr1 PE=1 SV=1								23649000
tr|Q61482|Q61482_MOUSE;tr|Q60709|Q60709_MOUSE;tr|Q3UDL6|Q3UDL6_MOUSE;tr|A0A1L1SS44|A0A1L1SS44_MOUSE;sp|Q06335|APLP2_MOUSE;tr|Q3TPZ7|Q3TPZ7_MOUSE;tr|Q7TT34|Q7TT34_MOUSE;tr|Q64348|Q64348_MOUSE;tr|Q3U775|Q3U775_MOUSE;tr|Q3U9N6|Q3U9N6_MOUSE;tr|Q8R0R7|Q8R0R7_MOUSE;tr|Q9CYS4|Q9CYS4_MOUSE;tr|Q3TV12|Q3TV12_MOUSE	tr|Q61482|Q61482_MOUSE;tr|Q60709|Q60709_MOUSE;tr|Q3UDL6|Q3UDL6_MOUSE;tr|A0A1L1SS44|A0A1L1SS44_MOUSE;sp|Q06335|APLP2_MOUSE;tr|Q3TPZ7|Q3TPZ7_MOUSE;tr|Q7TT34|Q7TT34_MOUSE;tr|Q64348|Q64348_MOUSE	tr|Q61482|Q61482_MOUSE CDE1-binding protein CDEBP OS=Mus musculus GN=Aplp2 PE=4 SV=1;tr|Q60709|Q60709_MOUSE Amyloid-like protein 2 OS=Mus musculus GN=Aplp2 PE=1 SV=1;tr|Q3UDL6|Q3UDL6_MOUSE Uncharacterized protein OS=Mus musculus GN=Aplp2 PE=2 SV=1;tr|A0A1L	34643000	335360000	283150000	337920000	136210000	239270000	218070000	171190000	303000000	169150000	190120000	179700000
tr|Q61565|Q61565_MOUSE;tr|Q8CIM9|Q8CIM9_MOUSE;sp|P16092|FGFR1_MOUSE;tr|J3QN85|J3QN85_MOUSE;tr|A0A1B0GSZ6|A0A1B0GSZ6_MOUSE;tr|Q60818|Q60818_MOUSE;tr|Q9R1A2|Q9R1A2_MOUSE;tr|Q9JJ17|Q9JJ17_MOUSE;tr|A0A1B0GSQ7|A0A1B0GSQ7_MOUSE;tr|D3Z4V6|D3Z4V6_MOUSE	tr|Q61565|Q61565_MOUSE;tr|Q8CIM9|Q8CIM9_MOUSE;sp|P16092|FGFR1_MOUSE;tr|J3QN85|J3QN85_MOUSE;tr|A0A1B0GSZ6|A0A1B0GSZ6_MOUSE;tr|Q60818|Q60818_MOUSE;tr|Q9R1A2|Q9R1A2_MOUSE;tr|Q9JJ17|Q9JJ17_MOUSE	tr|Q61565|Q61565_MOUSE FGF receptor-like molecule (Fragment) OS=Mus musculus GN=Fgfr1 PE=2 SV=1;tr|Q8CIM9|Q8CIM9_MOUSE Fibroblast growth factor receptor OS=Mus musculus GN=Fgfr1 PE=2 SV=1;sp|P16092|FGFR1_MOUSE Fibroblast growth factor receptor 1 OS=Mus mus		33758000	44312000	46510000		30746000	25859000
tr|Q61649|Q61649_MOUSE	tr|Q61649|Q61649_MOUSE	tr|Q61649|Q61649_MOUSE Alpha-globin mRNA (Fragment) OS=Mus musculus PE=2 SV=1	12326500000	1017600000	2663600000	749730000	1806100000	1716600000	3759300000	1576900000	1625700000	12280000000	4510000000	5991900000
tr|Q61650|Q61650_MOUSE	tr|Q61650|Q61650_MOUSE	tr|Q61650|Q61650_MOUSE Beta-globin (Fragment) OS=Mus musculus PE=2 SV=1									72327000
tr|Q61829|Q61829_MOUSE;tr|Q3TQP6|Q3TQP6_MOUSE;tr|Q99LF5|Q99LF5_MOUSE;tr|Q921S3|Q921S3_MOUSE;sp|P06801|MAOX_MOUSE	tr|Q61829|Q61829_MOUSE;tr|Q3TQP6|Q3TQP6_MOUSE;tr|Q99LF5|Q99LF5_MOUSE;tr|Q921S3|Q921S3_MOUSE;sp|P06801|MAOX_MOUSE	tr|Q61829|Q61829_MOUSE MOD-1 null malic enzyme (Fragment) OS=Mus musculus GN=Me1 PE=2 SV=1;tr|Q3TQP6|Q3TQP6_MOUSE Malic enzyme OS=Mus musculus GN=Me1 PE=1 SV=1;tr|Q99LF5|Q99LF5_MOUSE Me1 protein OS=Mus musculus GN=Me1 PE=2 SV=1;tr|Q921S3|Q921S3_MOUSE Malic	29678000
tr|Q642K0|Q642K0_MOUSE;sp|Q60605|MYL6_MOUSE;tr|A0A1W2P6F6|A0A1W2P6F6_MOUSE;tr|A0A1W2P7Q9|A0A1W2P7Q9_MOUSE;tr|Q3TIG9|Q3TIG9_MOUSE;tr|A0A1W2P6G5|A0A1W2P6G5_MOUSE;tr|B0LAC7|B0LAC7_MOUSE;sp|Q8CI43|MYL6B_MOUSE	tr|Q642K0|Q642K0_MOUSE;sp|Q60605|MYL6_MOUSE;tr|A0A1W2P6F6|A0A1W2P6F6_MOUSE;tr|A0A1W2P7Q9|A0A1W2P7Q9_MOUSE;tr|Q3TIG9|Q3TIG9_MOUSE;tr|A0A1W2P6G5|A0A1W2P6G5_MOUSE	tr|Q642K0|Q642K0_MOUSE MCG140959, isoform CRA_a OS=Mus musculus GN=Myl6 PE=2 SV=1;sp|Q60605|MYL6_MOUSE Myosin light polypeptide 6 OS=Mus musculus GN=Myl6 PE=1 SV=3;tr|A0A1W2P6F6|A0A1W2P6F6_MOUSE Myosin light polypeptide 6 OS=Mus musculus GN=Myl6 PE=1 SV=1;	37343000				36537000	33732000	27503000	18426000			14599000
tr|Q64526|Q64526_MOUSE;tr|Q9D3H7|Q9D3H7_MOUSE;tr|Q9D141|Q9D141_MOUSE	tr|Q64526|Q64526_MOUSE;tr|Q9D3H7|Q9D3H7_MOUSE;tr|Q9D141|Q9D141_MOUSE	tr|Q64526|Q64526_MOUSE Keratin-associated protein 9-1 OS=Mus musculus GN=Krtap9-1 PE=2 SV=1;tr|Q9D3H7|Q9D3H7_MOUSE MCG147033 OS=Mus musculus GN=Gm11559 PE=2 SV=1;tr|Q9D141|Q9D141_MOUSE MCG64125 OS=Mus musculus GN=Gm11567 PE=2 SV=1					1909700000
tr|Q66JR8|Q66JR8_MOUSE;sp|Q9D0J8|PTMS_MOUSE;tr|Q8VHU9|Q8VHU9_MOUSE	tr|Q66JR8|Q66JR8_MOUSE;sp|Q9D0J8|PTMS_MOUSE	tr|Q66JR8|Q66JR8_MOUSE Ptms protein OS=Mus musculus GN=Ptms PE=2 SV=1;sp|Q9D0J8|PTMS_MOUSE Parathymosin OS=Mus musculus GN=Ptms PE=1 SV=3	114040000	113430000		56950000	258470000	153340000	205990000	88874000	135900000	96397000	112130000	76819000
tr|Q684Q6|Q684Q6_MOUSE;tr|B7ZCL8|B7ZCL8_MOUSE;tr|Q542P4|Q542P4_MOUSE;sp|P70290|EM55_MOUSE;tr|A2AN84|A2AN84_MOUSE;tr|B7ZCL9|B7ZCL9_MOUSE;tr|B7ZCM0|B7ZCM0_MOUSE;tr|Q3THA8|Q3THA8_MOUSE;tr|D6RFD5|D6RFD5_MOUSE;tr|B7ZCM1|B7ZCM1_MOUSE	tr|Q684Q6|Q684Q6_MOUSE;tr|B7ZCL8|B7ZCL8_MOUSE;tr|Q542P4|Q542P4_MOUSE;sp|P70290|EM55_MOUSE;tr|A2AN84|A2AN84_MOUSE;tr|B7ZCL9|B7ZCL9_MOUSE	tr|Q684Q6|Q684Q6_MOUSE Membrane protein, palmitoylated (Fragment) OS=Mus musculus GN=Mpp1 PE=2 SV=1;tr|B7ZCL8|B7ZCL8_MOUSE 55 kDa erythrocyte membrane protein OS=Mus musculus GN=Mpp1 PE=1 SV=1;tr|Q542P4|Q542P4_MOUSE Membrane protein, palmitoylated OS=Mus m										52314000		36875000
tr|Q692V2|Q692V2_MOUSE;tr|A0A1W2P799|A0A1W2P799_MOUSE;sp|Q3UHB1|NT5D3_MOUSE	tr|Q692V2|Q692V2_MOUSE;tr|A0A1W2P799|A0A1W2P799_MOUSE;sp|Q3UHB1|NT5D3_MOUSE	tr|Q692V2|Q692V2_MOUSE Grp94 neighboring nucleotidase variant 4 (Fragment) OS=Mus musculus GN=Nt5dc3 PE=2 SV=1;tr|A0A1W2P799|A0A1W2P799_MOUSE Uncharacterized protein (Fragment) OS=Mus musculus PE=4 SV=1;sp|Q3UHB1|NT5D3_MOUSE 5-nucleotidase domain-containi	70822000
tr|Q69ZZ7|Q69ZZ7_MOUSE;sp|Q8VCC9|SPON1_MOUSE	tr|Q69ZZ7|Q69ZZ7_MOUSE;sp|Q8VCC9|SPON1_MOUSE	tr|Q69ZZ7|Q69ZZ7_MOUSE MKIAA0762 protein (Fragment) OS=Mus musculus GN=mKIAA0762 PE=4 SV=1;sp|Q8VCC9|SPON1_MOUSE Spondin-1 OS=Mus musculus GN=Spon1 PE=1 SV=1		80904000	108200000	109260000		69773000	56826000		100350000	35659000		66884000
tr|Q6DFY2|Q6DFY2_MOUSE;tr|Q3TYL3|Q3TYL3_MOUSE;tr|G5E8G3|G5E8G3_MOUSE	tr|Q6DFY2|Q6DFY2_MOUSE;tr|Q3TYL3|Q3TYL3_MOUSE;tr|G5E8G3|G5E8G3_MOUSE	tr|Q6DFY2|Q6DFY2_MOUSE Opioid-binding protein/cell adhesion molecule-like OS=Mus musculus GN=Opcml PE=1 SV=1;tr|Q3TYL3|Q3TYL3_MOUSE Uncharacterized protein OS=Mus musculus GN=Opcml PE=2 SV=1;tr|G5E8G3|G5E8G3_MOUSE MCG9827 OS=Mus musculus GN=Opcml PE=1 SV=1		57868000		58642000					49765000
tr|Q6GT24|Q6GT24_MOUSE;tr|Q53ZU7|Q53ZU7_MOUSE;sp|O08709|PRDX6_MOUSE;tr|Q6A0D0|Q6A0D0_MOUSE;tr|D3Z0Y2|D3Z0Y2_MOUSE;tr|Q8BPD3|Q8BPD3_MOUSE;tr|Q8BG37|Q8BG37_MOUSE;tr|A0A0A6YXQ7|A0A0A6YXQ7_MOUSE	tr|Q6GT24|Q6GT24_MOUSE;tr|Q53ZU7|Q53ZU7_MOUSE;sp|O08709|PRDX6_MOUSE;tr|Q6A0D0|Q6A0D0_MOUSE;tr|D3Z0Y2|D3Z0Y2_MOUSE;tr|Q8BPD3|Q8BPD3_MOUSE	tr|Q6GT24|Q6GT24_MOUSE Peroxiredoxin-6 OS=Mus musculus GN=Prdx6 PE=1 SV=1;tr|Q53ZU7|Q53ZU7_MOUSE Peroxiredoxin 6 OS=Mus musculus GN=Prdx6 PE=2 SV=1;sp|O08709|PRDX6_MOUSE Peroxiredoxin-6 OS=Mus musculus GN=Prdx6 PE=1 SV=3;tr|Q6A0D0|Q6A0D0_MOUSE MKIAA0106 pr	487590000	212860000	254050000	148610000	380130000	317060000	361620000	288610000	220100000	412020000	381950000	372340000
tr|Q6LEM8|Q6LEM8_MOUSE	tr|Q6LEM8|Q6LEM8_MOUSE	tr|Q6LEM8|Q6LEM8_MOUSE Uncharacterized protein (Fragment) OS=Mus musculus PE=2 SV=1					28617000
tr|Q6P1B9|Q6P1B9_MOUSE;sp|O08539|BIN1_MOUSE;tr|Q8C5M9|Q8C5M9_MOUSE	tr|Q6P1B9|Q6P1B9_MOUSE;sp|O08539|BIN1_MOUSE	tr|Q6P1B9|Q6P1B9_MOUSE Bin1 protein OS=Mus musculus GN=Bin1 PE=1 SV=1;sp|O08539|BIN1_MOUSE Myc box-dependent-interacting protein 1 OS=Mus musculus GN=Bin1 PE=1 SV=1	61480500	65865000				98340000	57965000				104550000	43102000
tr|Q6P3C3|Q6P3C3_MOUSE;sp|O09165|CASQ1_MOUSE;tr|E9Q489|E9Q489_MOUSE	tr|Q6P3C3|Q6P3C3_MOUSE;sp|O09165|CASQ1_MOUSE;tr|E9Q489|E9Q489_MOUSE	tr|Q6P3C3|Q6P3C3_MOUSE Calsequestrin OS=Mus musculus GN=Casq1 PE=2 SV=2;sp|O09165|CASQ1_MOUSE Calsequestrin-1 OS=Mus musculus GN=Casq1 PE=1 SV=3;tr|E9Q489|E9Q489_MOUSE Calsequestrin (Fragment) OS=Mus musculus GN=Casq1 PE=1 SV=1	38303000				78636000	93758000	51912000		40682000
tr|Q6P5I3|Q6P5I3_MOUSE;sp|P28474|ADHX_MOUSE;tr|A0A0G2JGS3|A0A0G2JGS3_MOUSE	tr|Q6P5I3|Q6P5I3_MOUSE;sp|P28474|ADHX_MOUSE	tr|Q6P5I3|Q6P5I3_MOUSE S-(hydroxymethyl)glutathione dehydrogenase OS=Mus musculus GN=Adh5 PE=1 SV=2;sp|P28474|ADHX_MOUSE Alcohol dehydrogenase class-3 OS=Mus musculus GN=Adh5 PE=1 SV=3	51163000										66012000	42082000
tr|Q6P6I8|Q6P6I8_MOUSE;tr|E0CYM8|E0CYM8_MOUSE;tr|Q2M4I8|Q2M4I8_MOUSE;sp|P97797|SHPS1_MOUSE;tr|A2ANC1|A2ANC1_MOUSE;tr|A0A0R4J1Z7|A0A0R4J1Z7_MOUSE;tr|E9QPT7|E9QPT7_MOUSE	tr|Q6P6I8|Q6P6I8_MOUSE;tr|E0CYM8|E0CYM8_MOUSE;tr|Q2M4I8|Q2M4I8_MOUSE;sp|P97797|SHPS1_MOUSE	tr|Q6P6I8|Q6P6I8_MOUSE Signal-regulatory protein alpha OS=Mus musculus GN=Sirpa PE=1 SV=1;tr|E0CYM8|E0CYM8_MOUSE Tyrosine-protein phosphatase non-receptor type substrate 1 OS=Mus musculus GN=Sirpa PE=1 SV=1;tr|Q2M4I8|Q2M4I8_MOUSE Ptpns1 OS=Mus musculus GN=	47671000	33730000	38530000	27978000			34528000	28679000			30941000	34864000
tr|Q6P6L5|Q6P6L5_MOUSE;tr|D3YU50|D3YU50_MOUSE;tr|F6RQD1|F6RQD1_MOUSE;tr|F7D574|F7D574_MOUSE;tr|G0YZM8|G0YZM8_MOUSE;tr|G0YZM9|G0YZM9_MOUSE	tr|Q6P6L5|Q6P6L5_MOUSE;tr|D3YU50|D3YU50_MOUSE;tr|F6RQD1|F6RQD1_MOUSE	tr|Q6P6L5|Q6P6L5_MOUSE Myosin-binding protein C, slow-type OS=Mus musculus GN=Mybpc1 PE=1 SV=1;tr|D3YU50|D3YU50_MOUSE Myosin-binding protein C, slow-type OS=Mus musculus GN=Mybpc1 PE=1 SV=1;tr|F6RQD1|F6RQD1_MOUSE Myosin-binding protein C, slow-type (Fragme	116855000				113300000	604350000	151810000				623490000
tr|Q6PB40|Q6PB40_MOUSE	tr|Q6PB40|Q6PB40_MOUSE	tr|Q6PB40|Q6PB40_MOUSE Kcp protein (Fragment) OS=Mus musculus GN=Kcp PE=2 SV=1										99262000		67238000
tr|Q6PE05|Q6PE05_MOUSE;tr|Q3TSS0|Q3TSS0_MOUSE;tr|A0A0U1RNT6|A0A0U1RNT6_MOUSE;tr|Q3UZA2|Q3UZA2_MOUSE;tr|A0A0U1RNK6|A0A0U1RNK6_MOUSE;tr|Q3UAP7|Q3UAP7_MOUSE;tr|Q99J57|Q99J57_MOUSE;tr|Q3TED1|Q3TED1_MOUSE;sp|Q3THS6|METK2_MOUSE;tr|A0A0U1RQ95|A0A0U1RQ95_MOUSE	tr|Q6PE05|Q6PE05_MOUSE;tr|Q3TSS0|Q3TSS0_MOUSE;tr|A0A0U1RNT6|A0A0U1RNT6_MOUSE;tr|Q3UZA2|Q3UZA2_MOUSE;tr|A0A0U1RNK6|A0A0U1RNK6_MOUSE;tr|Q3UAP7|Q3UAP7_MOUSE;tr|Q99J57|Q99J57_MOUSE;tr|Q3TED1|Q3TED1_MOUSE;sp|Q3THS6|METK2_MOUSE;tr|A0A0U1RQ95|A0A0U1RQ95_MOUSE	tr|Q6PE05|Q6PE05_MOUSE S-adenosylmethionine synthase OS=Mus musculus GN=Mat2a PE=2 SV=1;tr|Q3TSS0|Q3TSS0_MOUSE S-adenosylmethionine synthase OS=Mus musculus GN=Mat2a PE=2 SV=1;tr|A0A0U1RNT6|A0A0U1RNT6_MOUSE S-adenosylmethionine synthase OS=Mus musculus GN=					11604000
tr|Q6S9I0|Q6S9I0_MOUSE;tr|Q6S9I2|Q6S9I2_MOUSE;tr|Q6S9I3|Q6S9I3_MOUSE;tr|Q6DMP4|Q6DMP4_MOUSE;tr|E0CYI5|E0CYI5_MOUSE;CON__P01045-1;CON__Q2KJ62;CON__P01044-1	tr|Q6S9I0|Q6S9I0_MOUSE;tr|Q6S9I2|Q6S9I2_MOUSE;tr|Q6S9I3|Q6S9I3_MOUSE;tr|Q6DMP4|Q6DMP4_MOUSE	tr|Q6S9I0|Q6S9I0_MOUSE Kininogen 2 OS=Mus musculus GN=Kng2 PE=1 SV=1;tr|Q6S9I2|Q6S9I2_MOUSE HMW-kininogen-II variant OS=Mus musculus GN=Kng2 PE=1 SV=1;tr|Q6S9I3|Q6S9I3_MOUSE HMW kininogen-II OS=Mus musculus GN=Kng2 PE=1 SV=1;tr|Q6DMP4|Q6DMP4_MOUSE High mol	737760000	1020500000	882840000	706700000	1091300000	647090000	1008000000	1021600000	982290000		796920000	841590000
tr|Q6XLQ8|Q6XLQ8_MOUSE;tr|Q3TL33|Q3TL33_MOUSE;tr|G3UWV3|G3UWV3_MOUSE;tr|Q3UG11|Q3UG11_MOUSE;tr|Q3TUF3|Q3TUF3_MOUSE;sp|O35887|CALU_MOUSE;tr|G3UXA3|G3UXA3_MOUSE;tr|G3UY49|G3UY49_MOUSE;tr|G3V004|G3V004_MOUSE;tr|G3UWR0|G3UWR0_MOUSE;tr|Q3TQD1|Q3TQD1_MOUSE	tr|Q6XLQ8|Q6XLQ8_MOUSE;tr|Q3TL33|Q3TL33_MOUSE;tr|G3UWV3|G3UWV3_MOUSE;tr|Q3UG11|Q3UG11_MOUSE;tr|Q3TUF3|Q3TUF3_MOUSE;sp|O35887|CALU_MOUSE	tr|Q6XLQ8|Q6XLQ8_MOUSE Calumenin OS=Mus musculus GN=Calu PE=1 SV=1;tr|Q3TL33|Q3TL33_MOUSE Uncharacterized protein OS=Mus musculus GN=Calu PE=2 SV=1;tr|G3UWV3|G3UWV3_MOUSE Calumenin OS=Mus musculus GN=Calu PE=1 SV=1;tr|Q3UG11|Q3UG11_MOUSE Uncharacterized pr					108020000
tr|Q6ZWX2|Q6ZWX2_MOUSE;sp|P20065|TYB4_MOUSE;CON__P21752;tr|Q9D2R9|Q9D2R9_MOUSE;tr|A2AEH9|A2AEH9_MOUSE	tr|Q6ZWX2|Q6ZWX2_MOUSE;sp|P20065|TYB4_MOUSE	tr|Q6ZWX2|Q6ZWX2_MOUSE Thymosin, beta 4, X chromosome OS=Mus musculus GN=Tmsb4x PE=2 SV=1;sp|P20065|TYB4_MOUSE Thymosin beta-4 OS=Mus musculus GN=Tmsb4x PE=1 SV=1	959205000	449870000	458390000	359670000	786480000	541240000	759470000	509120000	662010000	619360000	675060000	544260000
tr|Q6ZWZ7|Q6ZWZ7_MOUSE;tr|Q6PHZ1|Q6PHZ1_MOUSE;sp|Q9CPR4|RL17_MOUSE;tr|Q505B1|Q505B1_MOUSE;tr|Q80V08|Q80V08_MOUSE	tr|Q6ZWZ7|Q6ZWZ7_MOUSE;tr|Q6PHZ1|Q6PHZ1_MOUSE;sp|Q9CPR4|RL17_MOUSE;tr|Q505B1|Q505B1_MOUSE;tr|Q80V08|Q80V08_MOUSE	tr|Q6ZWZ7|Q6ZWZ7_MOUSE 60S ribosomal protein L17 OS=Mus musculus GN=Rpl17 PE=1 SV=1;tr|Q6PHZ1|Q6PHZ1_MOUSE Rpl17 protein OS=Mus musculus GN=Rpl17 PE=2 SV=1;sp|Q9CPR4|RL17_MOUSE 60S ribosomal protein L17 OS=Mus musculus GN=Rpl17 PE=1 SV=3;tr|Q505B1|Q505B1_M						11667000
tr|Q71LX8|Q71LX8_MOUSE;sp|P11499|HS90B_MOUSE;tr|Q80YC2|Q80YC2_MOUSE;tr|Q811H6|Q811H6_MOUSE;tr|E9Q3D6|E9Q3D6_MOUSE;tr|E9PX27|E9PX27_MOUSE;tr|B7ZC50|B7ZC50_MOUSE;tr|D3Z1R1|D3Z1R1_MOUSE;tr|E9Q0C3|E9Q0C3_MOUSE;tr|Q8C2R2|Q8C2R2_MOUSE;tr|A2A6A2|A2A6A2_MOUSE;tr|B7ZC49|B7ZC49_MOUSE;REV__sp|Q8BL66|EEA1_MOUSE	tr|Q71LX8|Q71LX8_MOUSE;sp|P11499|HS90B_MOUSE	tr|Q71LX8|Q71LX8_MOUSE Heat shock protein 84b OS=Mus musculus GN=Hsp90ab1 PE=1 SV=1;sp|P11499|HS90B_MOUSE Heat shock protein HSP 90-beta OS=Mus musculus GN=Hsp90ab1 PE=1 SV=3	203570000	191050000		104780000	389640000	419470000	359710000	65214000	243050000	296790000	394910000	175740000
tr|Q71RH6|Q71RH6_MUSMM;tr|Q71RH5|Q71RH5_MUSMC;tr|Q548F2|Q548F2_MOUSE;tr|Q3U0C4|Q3U0C4_MOUSE;sp|Q9R111|GUAD_MOUSE;tr|Q69ZN0|Q69ZN0_MOUSE;tr|D3YU09|D3YU09_MOUSE;tr|Q6DFY1|Q6DFY1_MOUSE;tr|Q8BRJ7|Q8BRJ7_MOUSE	tr|Q71RH6|Q71RH6_MUSMM;tr|Q71RH5|Q71RH5_MUSMC;tr|Q548F2|Q548F2_MOUSE;tr|Q3U0C4|Q3U0C4_MOUSE;sp|Q9R111|GUAD_MOUSE;tr|Q69ZN0|Q69ZN0_MOUSE;tr|D3YU09|D3YU09_MOUSE;tr|Q6DFY1|Q6DFY1_MOUSE	tr|Q71RH6|Q71RH6_MUSMM Guanine deaminase OS=Mus musculus molossinus GN=Gda PE=2 SV=1;tr|Q71RH5|Q71RH5_MUSMC Guanine deaminase OS=Mus musculus castaneus GN=Gda PE=2 SV=1;tr|Q548F2|Q548F2_MOUSE Guanine deaminase OS=Mus musculus GN=Gda PE=1 SV=1;tr|Q3U0C4|Q3U	27308000
tr|Q71VC6|Q71VC6_MOUSE;tr|Q3U9D4|Q3U9D4_MOUSE;tr|Q544Q7|Q544Q7_MOUSE;sp|P97370|AT1B3_MOUSE	tr|Q71VC6|Q71VC6_MOUSE;tr|Q3U9D4|Q3U9D4_MOUSE;tr|Q544Q7|Q544Q7_MOUSE;sp|P97370|AT1B3_MOUSE	tr|Q71VC6|Q71VC6_MOUSE Na K-ATPase beta-3 subunit (Fragment) OS=Mus musculus GN=atp1b3 PE=4 SV=1;tr|Q3U9D4|Q3U9D4_MOUSE Sodium/potassium-transporting ATPase subunit beta OS=Mus musculus GN=Atp1b3 PE=2 SV=1;tr|Q544Q7|Q544Q7_MOUSE Sodium/potassium-transporti							16990000
[truncated: 149 more rows]
