# Supplementary material for: Decorin is an early CSF biomarker of Alzheimer’s Aβ amyloidosis
Source: Research Square preprint supplement (doi:10.21203/rs.3.rs-275229/v1), 2021-03-02
Supplement: Supplementary file 6 [file ea8cd362aa565f6e19632192.xlsx]

## Sheet: Sup for Fig 5a
Supplementary Table 6: List of proteins commonly/specifically altered in AppNL-F/NL-F and AppNL-G-F/NL-G-F respectively and similarly changed in abnormal-amyloid/normal-tau human subjects
AD-AppNL-G-F/NL-G-F vs AD-AppNL-F/NL-F								MCI-AppNL-G-F/NL-G-F vs MCI-AppNL-F/NL-F								NC-AppNL-G-F/NL-G-F vs NC-AppNL-F/NL-F
UP in BOTH groups	DOWN in BOTH groups	UP in ONE / DOWN in OTHER		EXLUSIVE UP/DOWN CHANGES				UP in BOTH groups	DOWN in BOTH groups	UP in ONE / DOWN in OTHER		EXLUSIVE UP/DOWN CHANGES				UP in BOTH groups	DOWN in BOTH groups	UP in ONE / DOWN in OTHER		EXLUSIVE UP/DOWN CHANGES
25 common elements in "AD-AppNL-G-F/NL-G-F up" and "AD-AppNL-F/NL-F up":	68 common elements in "AD-AppNL-G-F/NL-G-F down" and "AD-AppNL-F/NL-F down":	0 common elements in "AD-AppNL-G-F/NL-G-F down" and "AD-AppNL-F/NL-F up":	0 common elements in "AD-AppNL-G-F/NL-G-F up" and "AD-AppNL-F/NL-F down":	18 elements included exclusively in "AD-AppNL-G-F/NL-G-F down":	12 elements included exclusively in "AD-AppNL-G-F/NL-G-F up":	10 elements included exclusively in "AD-AppNL-F/NL-F up":	13 elements included exclusively in "AD-AppNL-F/NL-F down":	34 common elements in "MCI-AppNL-G-F/NL-G-F up" and "MCI-AppNL-F/NL-F up":	72 common elements in "MCI-AppNL-G-F/NL-G-F down" and "MCI-AppNL-F/NL-F down":	0 common elements in "MCI-AppNL-G-F/NL-G-F up" and "MCI-AppNL-F/NL-F up":	0 common elements in "MCI-AppNL-G-F/NL-G-F down" and "MCI-AppNL-F/NL-F down":	18 elements included exclusively in "MCI-AppNL-G-F/NL-G-F down":	16 elements included exclusively in "MCI-AppNL-G-F/NL-G-F up":	12 elements included exclusively in "MCI-AppNL-F/NL-F up":	12 elements included exclusively in "MCI-AppNL-F/NL-F down":	21 common elements in "NC-AppNL-G-F/NL-G-F up" and "NC-AppNL-F/NL-F up":	67 common elements in "NC-AppNL-G-F/NL-G-F down" and "NC-AppNL-F/NL-F down":	0 common elements in "NC-AppNL-G-F/NL-G-F up" and "NC-AppNL-F/NL-F up":	0 common elements in "NC-AppNL-G-F/NL-G-F down" and "NC-AppNL-F/NL-F down":	17 elements included exclusively in "NC-AppNL-G-F/NL-G-F down":	17 elements included exclusively in "NC-AppNL-G-F/NL-G-F up":	12 elements included exclusively in "NC-AppNL-F/NL-F up":	9 elements included exclusively in "NC-AppNL-F/NL-F down":
AHSG	APLP1			CADM4	AFM	ANXA2	B2M	AHSG	A2M			AKR1B1	AFM	ANXA2	B2M	ACTA1	ALDOA			AK1	AZGP1	ANXA2	AFM
AMBP	APOE			CKM	AZGP1	FMOD	BLVRB	AMBP	AGT			CADM4	AZGP1	CKM	C4B	AHSG	APLP1			AKR1B1	BLVRB	COL1A2	B2M
APOA1	ATP6AP1			CLEC3B	C4B	HP	CTSB	APOA1	ALDOA			CLEC3B	BLVRB	FMOD	CTSB	APOA1	APOE			CADM4	C4B	FMOD	CFI
APOA2	CDH2			COL1A1	CFI	HPX	CTSL	APOA2	APLP1			COL1A1	CAT	HPX	CTSL	APOA2	APOH			CKM	CAT	HPX	EFEMP1
APOA4	CHGA			CRTAC1	CP	ITIH1	CTSS	APOA4	APLP2			CRTAC1	CFI	ITIH1	CTSS	APOA4	APP			CLEC3B	CP	LRG1	GPLD1
CPN2	CHGB			HSPG2	CTSA	ITIH4	CTSZ	C3	APOE			HSPG2	CP	ITIH4	EFEMP1	CFL1	ATP6AP1			COL1A1	CTSA	LUM	IGFBP6
DCN	CHL1			MDH2	CTSD	LRG1	EFEMP1	CA1	APP			MDH2	CTSA	JCHAIN	GPLD1	CPE	BCAN			CRTAC1	CTSB	MDH2	NPTXR
F12	CLSTN1			NUCB1	F2	LUM	GPLD1	CA2	ATP6AP1			NUCB1	CTSD	LRG1	NPTXR	CPN2	CA3			HSPG2	CTSD	NUCB1	PSAP
FGA	CST3			OGN	GC	ORM1	LGALS3BP	CFL1	BCAN			OGN	CTSZ	LUM	PSAP	DCN	CDH2			IGHG1	CTSL	ORM1	SPOCK2
FGB	CYCS			PARK7	IGHG2	SERPINA6	NPTXR	CPN2	CA3			PARK7	F2	ORM1	SPARC	ENO1	CFD			OGN	CTSS	PGK1
FGG	DKK3			PCOLCE	IL1RAP		PSAP	DCN	CDH2			PCOLCE	GC	SERPINA6	SPOCK1	F12	CFH			PARK7	CTSZ	PHPT1
GLO1	FAM3C			PCSK1N	PLG		SPOCK1	F12	CFD			PCSK1N	HBB	TPM2	SPOCK2	FGG	CHGA			PCOLCE	F2	SERPINA6
HRG	FN1			PGK1			SPOCK2	FABP3	CHGA			PGK1	IGHG2			GAPDH	CHGB			PCSK1N	GC
IGKC	LSAMP			PRNP				FGA	CHGB			PHPT1	IL1RAP			GPX3	CHL1			PRNP	IGHG2
ITIH2	LY6H			RELN				GLO1	CHL1			PRNP	LGALS3BP			GRN	CLSTN1			TPI1	IL1RAP
KLKB1	NCAM1			TPI1				HRG	CLSTN1			RELN	PLG			PGAM1	CLU			TPM2	LGALS3BP
KNG1	NELL2			TPM2				IGHM	CLU			TPI1				PZP	CNTN1			VIM	PLG
PGAM1	NPTX1			VIM				IGKC	CNTN1			VIM				SERPINC1	CNTN2
PZP	NRCAM							ITIH2	CNTN2							TPPP3	COCH
SERPINC1	NTM							KLKB1	COCH							TPT1	CSF1R
SERPINF2	PAM							KNG1	CPQ							YWHAE	CST3
TKT	PENK							MB	CSF1R								CYCS
TPT1	PIK3IP1							MIF	CST3								DBI
YWHAE	PTPRN2							PGAM1	CYCS								DKK3
YWHAG	SCG2							PRDX1	DBI								ECM1
	SCG3							PRDX2	DKK3								FAM3C
	SCG5							PRDX6	ECM1								FETUB
	SEZ6L2							PZP	EPDR1								FN1
	VGF							SERPINC1	FAM3C								GM2A
	APP							SERPINF2	FBLN1								GOT1
	GM2A							TPPP3	FN1								GPI
	GOT1							TPT1	GM2A								IGFBP2
	NBL1							YWHAE	GOT1								IGFBP4
	NPPC							YWHAG	GSN								LDHA
	SOD1								HEXB								LSAMP
	SPARCL1								IGF2								LY6H
	ALDOA								IGFBP2								MAN2B1
	APLP2								IGFBP4								NBL1
	CA3								LDHA								NCAM1
	CNTN1								LSAMP								NELL2
	ECM1								LY6H								NME2
	PVALB								NBL1								NPPC
	LDHA								NCAM1								NPTX1
	QSOX1								NELL2								NRCAM
	DBI								NPC2								NTM
	SEMA7A								NPPC								PAM
	SPP1								NPTX1								PENK
	A2M								NRCAM								PGAM2
	PTGDS								NTM								PIK3IP1
	EPDR1								PAM								PKM
	PKM								PENK								PLTP
	CSF1R								PGAM2								PTGDS
	BCAN								PIK3IP1								PTPRN2
	NPC2								PKM								PVALB
	TCN2								PLTP								RBP4
	COCH								PTGDS								SCG2
	CLU								PTPRN2								SCG3
	CPQ								PVALB								SCG5
	IGFBP4								QSOX1								SELENOP
	SERPINF1								RNASE4								SERPING1
	AGT								SCG2								SEZ6L2
	CNTN2								SCG3								SOD1
	HEXB								SCG5								SPARCL1
	FBLN1								SELENOP								TCN2
	PLTP								SEMA7A								TF
	CFH								SERPING1								VGF
	GPI								SEZ6L2								VTN
	IGFBP2								SOD1
									SPARCL1
									SPP1
									TCN2
									VGF
