# Supplementary material for: Decorin is an early CSF biomarker of Alzheimer’s Aβ amyloidosis
Source: Research Square preprint supplement (doi:10.21203/rs.3.rs-275229/v1), 2021-03-02
Supplement: Supplementary file 8 [file ae0cbc9509984973694dcbbf.xlsx]

## Sheet: Common changes_Human vs Mouse
Supplementary Table 5: Commonly changed proteins in AppNL-F/NL-F and AppNL-G-F/NL-G-F mice vs NC/MCI/AD (abnormal-amyloid/normal-tau subjects)
AD vs AppNL-F/NL-F		MCI vs AppNL-F/NL-F		NC vs AppNL-F/NL-F		AD vs AppNL-G-F/NL-G-F		MCI vs AppNL-G-F/NL-G-F		NC vs AppNL-G-F/NL-G-F
35 common proteins - UP	81 common proteins - DOWN	46 common proteins - UP	84 common proteins - DOWN	33 common proteins - UP	76 common proteins - DOWN	37 common proteins - UP	86 common proteins - DOWN	50 common proteins - UP	90 common proteins - DOWN	38 common proteins - UP	84 common proteins - DOWN
AHSG	A2M	AHSG	A2M	ACTA1	AFM	AFM	A2M	AFM	A2M	ACTA1	AK1
AMBP	AGT	AMBP	AGT	AHSG	ALDOA	AHSG	AGT	AHSG	AGT	AHSG	AKR1B1
ANXA2	ALDOA	ANXA2	ALDOA	ANXA2	APLP1	AMBP	ALDOA	AMBP	AKR1B1	APOA1	ALDOA
APOA1	APLP1	APOA1	APLP1	APOA1	APOE	APOA1	APLP1	APOA1	ALDOA	APOA2	APLP1
APOA2	APLP2	APOA2	APLP2	APOA2	APOH	APOA2	APLP2	APOA2	APLP1	APOA4	APOE
APOA4	APOE	APOA4	APOE	APOA4	APP	APOA4	APOE	APOA4	APLP2	AZGP1	APOH
CPN2	APP	C3	APP	CFL1	ATP6AP1	AZGP1	APP	AZGP1	APOE	BLVRB	APP
DCN	ATP6AP1	CA1	ATP6AP1	COL1A2	B2M	C4B	ATP6AP1	BLVRB	APP	C4B	ATP6AP1
F12	B2M	CA2	B2M	CPE	BCAN	CFI	BCAN	C3	ATP6AP1	CAT	BCAN
FGA	BCAN	CFL1	BCAN	CPN2	CA3	CP	CA3	CA1	BCAN	CFL1	CA3
FGB	BLVRB	CKM	C4B	DCN	CDH2	CPN2	CADM4	CA2	CA3	CP	CADM4
FGG	CA3	CPN2	CA3	ENO1	CFD	CTSA	CDH2	CAT	CADM4	CPE	CDH2
FMOD	CDH2	DCN	CDH2	F12	CFH	CTSD	CFH	CFI	CDH2	CPN2	CFD
GLO1	CFH	F12	CFD	FGG	CFI	DCN	CHGA	CFL1	CFD	CTSA	CFH
HP	CHGA	FABP3	CHGA	FMOD	CHGA	F12	CHGB	CP	CHGA	CTSB	CHGA
HPX	CHGB	FGA	CHGB	GAPDH	CHGB	F2	CHL1	CPN2	CHGB	CTSD	CHGB
HRG	CHL1	FMOD	CHL1	GPX3	CHL1	FGA	CKM	CTSA	CHL1	CTSL	CHL1
IGKC	CLSTN1	GLO1	CLSTN1	GRN	CLSTN1	FGB	CLEC3B	CTSD	CLEC3B	CTSS	CKM
ITIH1	CLU	HPX	CLU	HPX	CLU	FGG	CLSTN1	CTSZ	CLSTN1	CTSZ	CLEC3B
ITIH2	CNTN1	HRG	CNTN1	LRG1	CNTN1	GC	CLU	DCN	CLU	DCN	CLSTN1
ITIH4	CNTN2	IGHM	CNTN2	LUM	CNTN2	GLO1	CNTN1	F12	CNTN1	ENO1	CLU
KLKB1	COCH	IGKC	COCH	MDH2	COCH	HRG	CNTN2	F2	CNTN2	F12	CNTN1
KNG1	CPQ	ITIH1	CPQ	NUCB1	CSF1R	IGHG2	COCH	FABP3	COCH	F2	CNTN2
LRG1	CSF1R	ITIH2	CSF1R	ORM1	CST3	IGKC	COL1A1	FGA	COL1A1	FGG	COCH
LUM	CST3	ITIH4	CST3	PGAM1	CYCS	IL1RAP	CPQ	GC	CPQ	GAPDH	COL1A1
ORM1	CTSB	JCHAIN	CTSB	PGK1	DBI	ITIH2	CRTAC1	GLO1	CRTAC1	GC	CRTAC1
PGAM1	CTSL	KLKB1	CTSL	PHPT1	DKK3	KLKB1	CSF1R	HBB	CSF1R	GPX3	CSF1R
PZP	CTSS	KNG1	CTSS	PZP	ECM1	KNG1	CST3	HRG	CST3	GRN	CST3
SERPINA6	CTSZ	LRG1	CYCS	SERPINA6	EFEMP1	PGAM1	CYCS	IGHG2	CYCS	IGHG2	CYCS
SERPINC1	CYCS	LUM	DBI	SERPINC1	FAM3C	PLG	DBI	IGHM	DBI	IL1RAP	DBI
SERPINF2	DBI	MB	DKK3	TPPP3	FETUB	PZP	DKK3	IGKC	DKK3	LGALS3BP	DKK3
TKT	DKK3	MIF	ECM1	TPT1	FN1	SERPINC1	ECM1	IL1RAP	ECM1	PGAM1	ECM1
TPT1	ECM1	ORM1	EFEMP1	YWHAE	GM2A	SERPINF2	EPDR1	ITIH2	EPDR1	PLG	FAM3C
YWHAE	EFEMP1	PGAM1	EPDR1		GOT1	TKT	FAM3C	KLKB1	FAM3C	PZP	FETUB
YWHAG	EPDR1	PRDX1	FAM3C		GPI	TPT1	FBLN1	KNG1	FBLN1	SERPINC1	FN1
	FAM3C	PRDX2	FBLN1		GPLD1	YWHAE	FN1	LGALS3BP	FN1	TPPP3	GM2A
	FBLN1	PRDX6	FN1		IGFBP2	YWHAG	GM2A	MB	GM2A	TPT1	GOT1
	FN1	PZP	GM2A		IGFBP4		GOT1	MIF	GOT1	YWHAE	GPI
	GM2A	SERPINA6	GOT1		IGFBP6		GPI	PGAM1	GSN		HSPG2
	GOT1	SERPINC1	GPLD1		LDHA		HEXB	PLG	HEXB		IGFBP2
	GPI	SERPINF2	GSN		LSAMP		HSPG2	PRDX1	HSPG2		IGFBP4
	GPLD1	TPM2	HEXB		LY6H		IGFBP2	PRDX2	IGF2		IGHG1
	HEXB	TPPP3	IGF2		MAN2B1		IGFBP4	PRDX6	IGFBP2		LDHA
	IGFBP2	TPT1	IGFBP2		NBL1		LDHA	PZP	IGFBP4		LSAMP
	IGFBP4	YWHAE	IGFBP4		NCAM1		LSAMP	SERPINC1	LDHA		LY6H
	LDHA	YWHAG	LDHA		NELL2		LY6H	SERPINF2	LSAMP		MAN2B1
	LGALS3BP		LSAMP		NME2		MDH2	TPPP3	LY6H		NBL1
	LSAMP		LY6H		NPPC		NBL1	TPT1	MDH2		NCAM1
	LY6H		NBL1		NPTX1		NCAM1	YWHAE	NBL1		NELL2
	NBL1		NCAM1		NPTXR		NELL2	YWHAG	NCAM1		NME2
	NCAM1		NELL2		NRCAM		NPC2		NELL2		NPPC
	NELL2		NPC2		NTM		NPPC		NPC2		NPTX1
	NPC2		NPPC		PAM		NPTX1		NPPC		NRCAM
	NPPC		NPTX1		PENK		NRCAM		NPTX1		NTM
	NPTX1		NPTXR		PGAM2		NTM		NRCAM		OGN
	NPTXR		NRCAM		PIK3IP1		NUCB1		NTM		PAM
	NRCAM		NTM		PKM		OGN		NUCB1		PARK7
	NTM		PAM		PLTP		PAM		OGN		PCOLCE
	PAM		PENK		PSAP		PARK7		PAM		PCSK1N
	PENK		PGAM2		PTGDS		PCOLCE		PARK7		PENK
	PIK3IP1		PIK3IP1		PTPRN2		PCSK1N		PCOLCE		PGAM2
	PKM		PKM		PVALB		PENK		PCSK1N		PIK3IP1
	PLTP		PLTP		RBP4		PGK1		PENK		PKM
	PSAP		PSAP		SCG2		PIK3IP1		PGAM2		PLTP
	PTGDS		PTGDS		SCG3		PKM		PGK1		PRNP
	PTPRN2		PTPRN2		SCG5		PLTP		PHPT1		PTGDS
	PVALB		PVALB		SELENOP		PRNP		PIK3IP1		PTPRN2
	QSOX1		QSOX1		SERPING1		PTGDS		PKM		PVALB
	SCG2		RNASE4		SEZ6L2		PTPRN2		PLTP		RBP4
	SCG3		SCG2		SOD1		PVALB		PRNP		SCG2
	SCG5		SCG3		SPARCL1		QSOX1		PTGDS		SCG3
	SEMA7A		SCG5		SPOCK2		RELN		PTPRN2		SCG5
	SERPINF1		SELENOP		TCN2		SCG2		PVALB		SELENOP
	SEZ6L2		SEMA7A		TF		SCG3		QSOX1		SERPING1
	SOD1		SERPING1		VGF		SCG5		RELN		SEZ6L2
	SPARCL1		SEZ6L2		VTN		SEMA7A		RNASE4		SOD1
	SPOCK1		SOD1				SERPINF1		SCG2		SPARCL1
	SPOCK2		SPARC				SEZ6L2		SCG3		TCN2
	SPP1		SPARCL1				SOD1		SCG5		TF
	TCN2		SPOCK1				SPARCL1		SELENOP		TPI1
	VGF		SPOCK2				SPP1		SEMA7A		TPM2
			SPP1				TCN2		SERPING1		VGF
			TCN2				TPI1		SEZ6L2		VIM
			VGF				TPM2		SOD1		VTN
							VGF		SPARCL1
							VIM		SPP1
									TCN2
									TPI1
									VGF
									VIM

## Sheet: Common significantly changes
Supplementary Table 5: Common significantly changed proteins in AppNL-F/NL-F and AppNL-G-F/NL-G-F mice vs NC/MCI/AD (abnormal-amyloid/normal-tau subjects)
AD vs AppNL-F/NL-F		MCI vs AppNL-F/NL-F		NC vs AppNL-F/NL-F		AD vs AppNL-G-F/NL-G-F		MCI vs AppNL-G-F/NL-G-F		NC vs AppNL-G-F/NL-G-F
0 common proteins - UP	8 common proteins - DOWN	0 common proteins - UP	6 common proteins - DOWN	1 common proteins - UP	0 common proteins - DOWN	2 common proteins - UP	12 common proteins - DOWN	0 common proteins - UP	9 common proteins - DOWN	0 common proteins - UP	0 common proteins - DOWN
	CNTN1		DKK3	DCN		APOA1	APLP1		APLP1
	DKK3		FAM3C			APOA2	CNTN1		CYCS
	FAM3C		NELL2				CYCS		ECM1
	FN1		NTM				ECM1		FAM3C
	NELL2		PIK3IP1				FAM3C		GM2A
	NTM		SPARCL1				FN1		LSAMP
	PIK3IP1						GM2A		NBL1
	SPARCL1						GOT1		NPPC
							LSAMP		SPARCL1
							NBL1
							NPPC
							SPARCL1
