# Supplementary material for: Decorin is an early CSF biomarker of Alzheimer’s Aβ amyloidosis
Source: Research Square preprint supplement (doi:10.21203/rs.3.rs-275229/v1), 2021-03-02
Supplement: Supplementary file 9 [file c0ac13d58e0f83d700ca7be8.xlsx]

## Sheet: Normalized Protein Expression
Supplementary Table 3: Significantly altered autophagy, ECM and BBB associated proteins in mouse CSF determined by PEA
Uniprot ID/Gene/Protein	log2 of Appwt/wt 1	log2 of Appwt/wt 2	log2 of Appwt/wt 3	log2 of Appwt/wt 4	log2 of Appwt/wt 5	log2 of AppNL-F/NL-F 1	log2 of AppNL-F/NL-F 2	log2 of AppNL-F/NL-F 3	log2 of AppNL-F/NL-F 4	log2 of AppNL-F/NL-F 5	log2 of AppNL-G-F/NL-G-F 1	log2 of AppNL-G-F/NL-G-F 2	log2 of AppNL-G-F/NL-G-F 3	log2 of AppNL-G-F/NL-G-F 4	log2 of AppNL-G-F/NL-G-F 5	Ratio of AppNL-F/NL-F/Appwt/wt	p-value	Ratio of AppNL-G-F/NL-G-F/Appwt/wt	p-value	Ratio of AppNL-F/NL-F/AppNL-G-F/NL-G-F	p-value
O89023/Tpp1/Tripeptidyl-peptidase 1	2.90656	2.94466	3.54256	3.29407	3.24562	2.90333	3.73435	4.10489	3.23199	4.18377	4.42794	4.14685	4.58667	3.74506	3.78262	1.13963	0.1438	1.29847	0.0017	0.877674	0.1296
O08746/Matn2/Matrilin-2	5.48927	5.47205	5.80325	5.46002	5.33702	4.88716	4.87614	6.17762	4.90272	4.80731	4.75749	4.77565	4.46488	4.86559	5.04198	0.930677	0.0159	0.867351	0.0079	1.07301	0.411
O54775/Wisp1/CCN family member 4	1.03976	0.9795	1.62683	1.59965	1.5195	1.55903	1.42416	1.48017	1.74139	2.02768	1.14758	0.82962	1.36247	1.01575	1.11297	1.21687	0.1396	0.808307	0.1573	1.50546	0.0042
P31240/Pdgfb/Platelet-derived growth factor subunit B	2.40454	1.90919	2.91681	2.02529	1.42464	1.77086	4.03345	3.31909	2.8059	3.56216	1.50303	0.97673	2.34758	1.43849	2.58191	1.45045	0.07	0.828404	0.3757	1.75089	0.0264
Data were analyzed by student's t-test. If the data were not normally distributed, then analyzed by Mann Whitney test.
