# Supplementary material for: Decorin is an early CSF biomarker of Alzheimer’s Aβ amyloidosis
Source: Research Square preprint supplement (doi:10.21203/rs.3.rs-275229/v1), 2021-03-02
Supplement: Supplementary file 10 [file d1e361760b6ab1cacbbbe8b6.xlsx]

## Sheet: Sheet1
Supplementary Table 7: List of postmortem brain samples used in immunohistochemistry
	Subjects	Gender	Age	Braak stage	CAA	APOE
	Control 1	M	78	0	-	E3/E2
	Control 2	M	78	0-I	-	Unknown
	Control 3	M	51	0	-	Unknown
	AD 1	F	78	VI	+	E3/E4
	AD 2	F	78	VI	+	E3/E4
	AD 3	M	52	VI	+	E3/E3
