# Supplementary material for: Decorin is an early CSF biomarker of Alzheimer’s Aβ amyloidosis
Source: Research Square preprint supplement (doi:10.21203/rs.3.rs-275229/v1), 2021-03-02
Supplement: Supplementary file 11 [file efab03d5a657cddb9d3fe24c.xlsx]

## Sheet: All proteins
Supplementary Table 4: Whole proteome comparison of AppNL-F/NL-F and AppNL-G-F/NL-G-F mice vs NC/MCI/AD (abnormal-amyloid/abnormal-tau subjects)
AppNL-F/NL-F vs human (NC, MCI and AD) comparisons																								AppNL-G-F/NL-G-F vs human (NC, MCI and AD) comparisons
AD (abeta +, tau +) vs AppNL-F/NL-F								MCI (abeta +, tau +) vs AppNL-F/NL-F								NC (abeta +, tau +) vs AppNL-F/NL-F								AD (abeta +, tau +) vs AppNL-G-F/NL-G-F								MCI (abeta +, tau +) vs AppNL-G-F/NL-G-F								NC (abeta +, tau +) vs AppNL-G-F/NL-G-F
UP in BOTH groups	DOWN in BOTH groups	UP in ONE / DOWN in OTHER		EXLUSIVE UP/DOWN CHANGES				UP in BOTH groups	DOWN in BOTH groups	UP in ONE / DOWN in OTHER		EXLUSIVE UP/DOWN CHANGES				UP in BOTH groups	DOWN in BOTH groups	UP in ONE / DOWN in OTHER		EXLUSIVE UP/DOWN CHANGES				UP in BOTH groups	DOWN in BOTH groups	UP in ONE / DOWN in OTHER		EXLUSIVE UP/DOWN CHANGES				UP in BOTH groups	DOWN in BOTH groups	UP in ONE / DOWN in OTHER		EXLUSIVE UP/DOWN CHANGES				UP in BOTH groups	DOWN in BOTH groups	UP in ONE / DOWN in OTHER		EXLUSIVE UP/DOWN CHANGES
53 common elements in "AD UP" and "AppNL-F/NL-F UP":	27 common elements in "AD DOWN" and "AppNL-F/NL-F DOWN":	88 common elements in "AD UP" and "AppNL-F/NL-F DOWN":	31 common elements in "AD DOWN" and "AppNL-F/NL-F UP":	22 elements included exclusively in "AppNL-F/NL-F DOWN":	30 elements included exclusively in "AppNL-F/NL-F UP":	485 elements included exclusively in "AD DOWN":	997 elements included exclusively in "AD UP":	47 common elements in "MCI UP" and "AppNL-F/NL-F UP":	26 common elements in "MCI DOWN" and "AppNL-F/NL-F DOWN":	90 common elements in "MCI UP" and "AppNL-F/NL-F DOWN":	41 common elements in "MCI DOWN" and "AppNL-F/NL-F UP":	21 elements included exclusively in "AppNL-F/NL-F DOWN":	26 elements included exclusively in "AppNL-F/NL-F UP":	524 elements included exclusively in "MCI DOWN":	1108 elements included exclusively in "MCI UP":	39 common elements in "NC UP" and "AppNL-F/NL-F UP":	24 common elements in "NC DOWN" and "AppNL-F/NL-F DOWN":	92 common elements in "NC UP" and "AppNL-F/NL-F DOWN":	49 common elements in "NC DOWN" and "AppNL-F/NL-F UP":	21 elements included exclusively in "AppNL-F/NL-F DOWN":	26 elements included exclusively in "AppNL-F/NL-F UP":	569 elements included exclusively in "MCI DOWN":	995 elements included exclusively in "MCI UP":	53 common elements in "AD Up" and "AppNL-G-F/NL-G-F Up":	29 common elements in "AD Down" and "AppNL-G-F/NL-G-F Down":	87 common elements in "EMIF-AD up" and "AppNL-G-F/NL-G-F down":	32 common elements in "EMIF-AD down " and "AppNL-G-F/NL-G-F up ":	19 elements included exclusively in "AppNL-G-F/NL-G-F Down":	24 elements included exclusively in "AppNL-G-F/NL-G-F Up":	482 elements included exclusively in "EMIF-AD down ":	998 elements included exclusively in "EMIF-AD up":	47 common elements in "MCI Up" and "AppNL-G-F/NL-G-F Up":	28 common elements in "MCI Down" and "AppNL-G-F/NL-G-F Down":	90 common elements in "MCI Up" and "AppNL-G-F/NL-G-F Down":	41 common elements in "MCI Down" and "AppNL-G-F/NL-G-F Up":	17 elements included exclusively in "AppNL-G-F/NL-G-F Down":	21 elements included exclusively in "AppNL-G-F/NL-G-F Up":	522 elements included exclusively in "MCI Down":	1108 elements included exclusively in "MCI Up":	38 common elements in "NC up " and "AppNL-G-F/NL-G-F up":	26 common elements in "NC down" and "AppNL-G-F/NL-G-F down":	93 common elements in "NC up " and "AppNL-G-F/NL-G-F down":	49 common elements in "NC down" and "AppNL-G-F/NL-G-F up":	16 elements included exclusively in "AppNL-G-F/NL-G-F down":	22 elements included exclusively in "AppNL-G-F/NL-G-F up":	567 elements included exclusively in "NC down":	995 elements included exclusively in "NC up ":
YWHAE	CA3	SPP1	CKM	LYZ2	CALM3	HBB	YWHAZ	CKB	GPLD1	ALDOA	KNG1	LYZ2	CALM3	IGHG3	ADAM23	LDHB	GPLD1	ALDOA	ANXA5	LYZ2	CALM3	CPB2	BASP1	YWHAE	CKM	TPI1	HBB	PLA2G7	SERPINA3N	HBZ	YWHAZ	CKB	CFB	ALDOA	GPLD1	PLA2G7	SERPINA3N	IGHG3	ADAM23	LDHB	APOH	ALDOA	ANXA5	PLA2G7	SERPINA3N	CPB2	BASP1
UBC	GPLD1	PKM	CA1	PRNPB	LMNA	HBZ	YWHAB	ENO1	CFI	APLP1	AMBP	PRNPB	LMNA	IGHV3-20	AJAP1	MDH1	APOH	GOT1	KNG1	PRNPB	LMNA	IGHV3-20	BTD	UBC	CA3	SPP1	CA1	ANXA6	CALM3	IGHV3-20	YWHAB	ENO1	HPX	APLP1	KNG1	ANXA6	CALM3	IGHV3-20	AJAP1	MDH1	IGHG1	GOT1	KNG1	ANXA6	CALM3	IGHV3-20	BTD
TPI1	VGF	LDHA	CA2	PLA2G7	ATP5B	IGHV3-20	VSIG4	FABP3	VTN	APP	HPX	PLA2G7	ATP5B	IGHV3-30	ALDOC	PARK7	RBP4	PKM	VIM	PLA2G7	ATP5B	MYRF	CAMK2A	TMSB4X	ANXA2	PKM	CA2	TRY10	MUG1	PLXNA1	VSIG4	FABP3	CKM	APP	AMBP	TRY10	MUG1	IGHV3-30	ALDOC	PDIA3	VIM	PKM	GPLD1	TRY10	MUG1	MYRF	CAMK2A
TMSB4X	NPTXR	GPI	MB	TRY10	ATP5A1	PLXNA1	VASN	HSPA8	AFM	CDH2	IGKC	TRY10	ATP5A1	IGHV3-43D	AP2B1	PDIA3	AFM	SOD1	TPM2	TRY10	ATP5A1	HSPA1A	CHI3L1	PPIA	VGF	PGK1	MB	IGH	SERPINA1D	ZNF648	VASN	HSPA8	VTN	CDH2	IGKC	IGH	SERPINA1D	IGHV3-43D	AP2B1	PEBP1	TPM2	SOD1	AFM	IGH	SERPINA1D	HSPA1A	CHI3L1
PPIA	APOH	GOT1	ANXA2	SERPINA3N	ANXA6	ZNF648	UCHL1	LDHB	APOH	CLSTN1	CKM	SERPINA3N	ANXA6	IGHV3-7	BASP1	PEBP1	VTN	SPP1	HPX	SERPINA3N	ANXA6	IGHV2-70D	CPD	PGAM1	CFB	PARK7	GPLD1	IDH2	SERPINA1E	C1QTNF1	UCHL1	LDHB	APOH	CLSTN1	IGHG2	IDH2	SERPINA1E	IGHV3-7	BASP1	PGAM1	RBP4	SPP1	SERPINF2	IDH2	SERPINA1E	IGHV2-70D	CPD
PGK1	BLVRB	ALDOA	IGHM	IGH	PTMA	C1QTNF1	UBE2V1	MDH1	AZGP1	CYCS	MB	IGH	PTMA	IGHV3-72	BGLAP	PGAM1	PLG	APP	SERPINF2	IGH	PTMA	SERPINA4	DDAH1	PEBP1	APOH	LDHA	IGHM	CS	SERPINA3K	HBA1	UBE2V1	MDH1	LRG1	CYCS	CFI	CS	SERPINA3K	IGHV3-72	BGLAP	PSAP	HPX	APP	IGKC	CS	SERPINA3K	SERPINA4	DDAH1
PGAM1	TCN2	SOD1	KNG1	SERPINA3K	ACO2	HBA1	UBE2N	MIF	FETUB	GOT1	APOA1	SERPINA3K	ACO2	IGHV3-9	BLMH	UBC	CFI	BCAN	IGKC	SERPINA3K	ACO2	S100A6	ENO2	MIF	TCN2	GPI	KNG1	ENO3	ICA	HBD	UBE2N	MIF	FETUB	GOT1	MB	ENO3	ICA	IGHV3-9	BLMH	UBC	VTN	PARK7	PLG	ENO3	ICA	S100A6	ENO2
PEBP1	CFI	EFEMP1	SELENBP1	MUP2	PRDX5	HBD	UBB	PARK7	BLVRB	GPI	HRG	MUP2	PRDX5	PRAP1	CALM1	MDH2	ALB	CHGA	SERPINA6	MUP2	PRDX5	ABI3BP	FAIM2	MDH1	VIM	GOT1	CAT	PFKM	SERPINA1C	NPTX2	UBB	PEBP1	ORM1	GPI	AFM	PFKM	SERPINA1C	PRAP1	CALM1	MIF	SERPINA6	BCAN	AHSG	PFKM	SERPINA1C	ABI3BP	FAIM2
PARK7	PENK	SPOCK2	C3	ICA	IDH2	NPTX2	UBA52	PEBP1	ALB	LDHA	APOA4	ICA	IDH2	ENG	CAMK2A	MIF	F2	CLSTN1	CKM	ICA	IDH2	FLNA	GAP43	LDHB	PENK	ALDOA	SELENBP1	PYGM	TUBA4A	S100A4	UBA52	PGAM1	ALB	LDHA	APOA1	PYGM	TUBA4A	ENG	CAMK2A	CALR	CKM	CHGA	APOA4	PYGM	TUBA4A	FLNA	GAP43
MIF	VTN	CYCS	JCHAIN	CES1C	ACP1	S100A4	TPD52	PGAM1	CP	PKM	C3	CES1C	ACP1	LGMN	CDH13	CALR	GC	CNTN2	AHSG	CES1C	ACP1	HSPA6	GDA	FABP3	VTN	SOD1	NPTXR	GPD1	ACP1	CST6	TPD52	PPIA	ANXA2	PARK7	AZGP1	GPD1	ACP1	LGMN	CDH13	CPE	CFB	CLSTN1	KLKB1	GPD1	ACP1	HSPA6	GDA
MDH1	RBP4	CTSB	APOA2	SERPINA1A	ATP2A1	CST6	TMSB4Y	PGK1	PLG	SOD1	LRG1	SERPINA1A	ATP2A1	SPINK1	CHI3L1	CPE	TF	LDHA	APOA4	SERPINA1A	ATP2A1	OVCH2	GSS	ENO1	RBP4	PCSK1N	C3	PHPT1	TPPP3	IGHV3-74	TMSB4Y	TMSB4X	RBP4	PGK1	HRG	ADSSL1	ATP5A1	SPINK1	CHI3L1	YWHAE	ANXA2	CNTN2	CFI	ADSSL1	ATP5A1	OVCH2	GSS
LDHB	TF	NPC2	ANXA5	PYGM	TUBA4A	IGHV3-74	TMSB10	PPIA	GC	SPP1	SERPINF2	PYGM	TUBA4A	TGM4	CHRD	YWHAE	FHL1	NELL2	KLKB1	PYGM	TUBA4A	PON1	HPRT1	CKB	TF	MDH2	BLVRB	PGAM2	ATP5A1	METTL18	TMSB10	UBC	CFH	PKM	APOA4	MYH1	MUP17	TGM4	CHRD	CTSL	ALB	LDHA	SERPINC1	MYH1	MUP17	PON1	HPRT1
FABP3	PLG	EPDR1	VIM	SERPINA1C	GSTM1	METTL18	STMN2	TMSB4X	RBP4	APLP2	IGHM	SERPINA1C	GSTM1	UACA	CNTNAP2	THY1	CA3	PSAP	ITIH4	SERPINA1C	GSTM1	PRAP1	L1CAM	YWHAG	MAN2B1	CYCS	CFI	ADSSL1	MUP17	TAC1	STMN2	YWHAE	PGAM2	PRNP	C3	AK1	VCP	UACA	CNTNAP2	THY1	TF	NELL2	CAT	ACO2	VCP	PRAP1	L1CAM
ENO1	MAN2B1	DBI	APOA4	ENO3	TPPP3	TAC1	STMN1	TPI1	CFH	BCAN	ORM1	ENO3	HBBT1	CFB	COTL1	TPI1	CFH	SEMA7A	SERPINC1	ENO3	HBBT1	ADAMDEC1	LAMP5	CTSB	F5	NPC2	APOA2	MYH1	VCP	CD46	STMN1	HSPA5	CA3	SOD1	SERPINF2	ACO2	GSTM1	CPB2	COTL1	B2M	FHL1	SEMA7A	F12	ATP2A1	GSTM1	ADAMDEC1	LAMP5
CKB	F5	APP	F12	GPD1	HBBT1	CD46	SPON1	UBC	PGAM2	CHGA	ITIH1	GPD1	CS	CPB2	CPD	CKB	PGAM2	APLP2	ANXA2	GPD1	CS	HSPA7	LDHAL6A	HSPA8	HPX	EPDR1	ANXA5	AK1	GSTM1	VNN3	SPON1	PDIA3	F5	SPP1	IGHM	ATP2A1	ATP5B	CPM	CPD	CKB	CA3	APLP2	HRG	CES1C	ATP5B	HSPA7	LDHAL6A
PCSK1N	FETUB	APLP2	SERPINF2	MUP17	CS	VNN3	SOD2	YWHAE	CA3	CHL1	SERPINC1	MUP17	MYH4	CPM	DDAH1	FABP3	NME2	CDH2	F12	MUP17	MYH4	IGHV3-30	LDHC	GAPDH	TPM2	DBI	APOA4	ACO2	ATP5B	ANXA2P2	SOD2	CTSL	FHL1	TPI1	BLVRB	CES1C		FCN3	DDAH1	CTSB	CFH	CDH2	F2	PRDX5	BPGM	IGHV3-30	LDHC
MDH2	LY6H	SPOCK1	HPX	MUG1	MYH4	ANXA2P2	SNCG	HSPA5	F5	CLU	ITIH4	MUG1	CKMT2	FCN3	DTD1	TMSB4X	F5	CHL1	HRG	MUG1	CKMT2	IGHV4-30-2	NAXE	PSAP	FETUB	APP	F12	ATP2A1	BPGM	APCS	SNCG	CALR	IGHG1	APLP2	CAT	PRDX5	LYZ2	IGHV1-2	DTD1	NPTXR	PGAM2	CHL1	AMBP		LYZ2	IGHV4-30-2	NAXE
YWHAG	AFM	PSAP	IGKC	PGAM2	CKMT2	APCS	SMOC1	MDH2	CTSA	CST3	FGA	SERPINA1D	MYH1	IGHV1-2	ENO2	ENO1	FETUB	CYCS	ITIH1	SERPINA1D	MYH1	IGHV4-30-4	PCDH8	GSTP1	LY6H	APLP2	SERPINF2	CES1C	ARHGDIA	CALU	SMOC1	GLO1	MAN2B1	BCAN	SERPINC1		GPX1	IGHV3-64D	ENO2	FABP3	AKR1B1	CYCS	APOA1		GPX1	IGHV4-30-4	PCDH8
HSPA8	SERPINF1	APOD	APOA1	SERPINA1D	ARHGDIA	CALU	SH3BGRL3	PCSK1N	FHL1	FAM3C	CPN2	ADSSL1	SERPINA1E	IGHV3-64D	EPHB6	PGK1	IL1RAP	FAM3C	AMBP	ADSSL1	SERPINA1E	IGHV4-34	SMOC1	GLO1	SERPINF1	PCOLCE	PLG	PRDX5	LYZ2	HIST3H2BB	SH3BGRL3	PSAP	TTR	CHGA	CP		MUP2	IGKV1-17	EPHB6	TMSB4X	NME2	FAM3C	APOA2		MUP2	IGHV4-34	SMOC1
GAPDH	SCG2	BCAN	TPM2	ADSSL1	MYH1	HIST3H2BB	RPS27A	PDIA3	C4B	NPPC	APOA2	PGM2	KNG2	IGKV1-17	FAIM2	CLEC3B	SERPIND1	GSN	APOA1	PGM2	KNG2	IGHV4-38-2	SOD2	CPE	SCG2	APOD	EGFR		GPX1	IGKV2-24	RPS27A	CTSB	TF	CHL1	FGA		PTMA	IGKV2D-30	FAIM2	ENO1	F5	GSN	GC		PTMA	IGHV4-38-2	SOD2
GSTP1	PTPRN2	RNASE4	AMBP	PGM2	SERPINA1E	IGKV2-24	PPIAL4G	CALR	MAN2B1	NRCAM	CA2	AKR1B3	MYL1	IGKV2D-30	FKBP1A	GAPDH	TTR	NPTX1	APOA2	AKR1B3	MYL1	IGHV4-39	STMN2	GRN	PTPRN2	BCAN	IGKC		MUP2	ERBB3	PPIAL4G	GAPDH	SERPIND1	CLU	CPN2		EEF2	IGKV3-20	FKBP1A	LGALS3BP	FETUB	MDH2	C3		EEF2	IGHV4-39	STMN2
GLO1	ALB	GSN	THY1	AKR1B3	KNG2	ERBB3	PPIAL4E	GLO1	TTR	NTM	JCHAIN		VCP	IGKV3-20	FRZB	HSPA8	BLVRB	NRCAM	C3		VCP	IGHV4-59	YWHAH	CTSL	IGHG1	RNASE4	APOA1		PTMA	IGKV6-21	PPIAL4E	PRDX1	AKR1B1	CRTAC1	APOA2		PGM2	IGKV3D-20	FRZB	CTSZ	SERPIND1	NPTX1	ACTG1		PGM2	IGHV4-59	YWHAH
CPE	TTR	CNTN2	GPX3		MYL1	IGKV6-21	PPIAL4D	GAPDH	F2	PTGDS	KLKB1		IGHG2B	IGKV3D-20	GAP43	NUCB1	AZGP1	NTM	ACTG1		IGHG2B	IGHV4-61	AJAP1	CTSS	ALB	GSN	AFM		EEF2	LGMN	PPIAL4D	CTSS	LUM	CST3	PLG			IGKV4-1	GAP43	CTSA	TTR	NRCAM	ACTA1			IGHV4-61	AJAP1
GRN	CTSA	PVALB	ITIH4		VCP	LGMN	PPIAL4C	PRDX1	TF	SEZ6L2	ANXA2		AK1	IGKV4-1	GDA	GSTP1	CP	PAM	ACTA1		GPX1	IGLV3-10	ALCAM	PRDX1	TTR	CNTN2	IGHG2		PGM2	NPY	PPIAL4C	GRN	SERPINA6	FAM3C	CA2			P0DOX7	GDA	GAPDH	OGN	NTM	GLO1			IGLV3-10	ALCAM
PRDX1	ECM1	PLTP	TPT1		PHPT1	NPY	PPIAL4A	GRN	SERPIND1	CTSL	ANXA5		GPX1	P0DOX7	GDI1	PPIA		SEZ6L2	GLO1		BPGM	CFP	AP2B1	PDIA3	LUM	PVALB	AMBP			P0DOX3	PPIAL4A	B2M	VIM	MDH2	GC			APCS	GDI1	HSPA8	AK1	PAM	ITIH2			CFP	AP2B1
PDIA3	FHL1	SERPIND1	HRG		IGHG2B	P0DOX3	PMP2	YWHAG	PENK	DBI	AHSG		PFKM	APCS	GGCT	SELENBP1		APLP1	ITIH2		PFKM	CPXM1	C4orf48	LGALS1	SERPINA6	PLTP	THY1			PRAP1	PMP2	YWHAG	PENK	NPPC	KLKB1			CHMP4A	GGCT	CTSD	ORM1	SEZ6L2	MB			CPXM1	C4orf48
LGALS1	SCG3	NCAM1	LUM		AK1	PRAP1	PGAM4	CPE		LSAMP	FGB			CHMP4A	GLRX	PCSK1N		DBI	MB			F13B	CACNA2D1	IL1RAP	ECM1	SERPIND1	GPX3			S100A8	PGAM4	CPE	TPM2	NRCAM	ANXA5			F13B	GLRX	C4B		APLP1	CFL1			F13B	CACNA2D1
PZP		CTSL	SERPINA6		GPX1	S100A8	NRGN	THY1		NBL1	HP			F13B	GMFB	FMOD		EPDR1	CFL1			IGHV3-43	CACNA2D3	PZP	FHL1	NCAM1	TPT1			FOLR3	NRGN	THY1	PHPT1	NTM	AHSG			IGHV5-51	GMFB	GSTP1		CRTAC1	TKT			IGHV3-43	CACNA2D3
CLEC3B		CLSTN1	KLKB1		BPGM	CAT	NEFL	CFL1		NCAM1	FGG			IGHV5-51	GMFG	HSPA5		SPOCK2	TKT			IGHV3-74	CANT1	C4B	SCG3	CLSTN1	CTSA			ICAM1	NEFL	CFL1		PCSK1N	CTSA			IGKV2-29	GMFG	HBB		DBI	TPPP3			IGHV3-74	CANT1
FMOD		CDH2	ITIH1		PFKM	FOLR3	MARCKS	PRDX6		NELL2	CA1			IGKV2-29	GOT2	COL1A1		CNTN1	TPPP3			IGKV2-29	CNTNAP2	CTSD		CDH2	HRG			IGLC2	MARCKS	NPTXR		PTGDS	FGB			IGKV2D-26	GOT2	PPIA		EPDR1	PRDX6			IGKV2-29	CNTNAP2
CALR		SEMA7A	FGA			ICAM1	MAPT	CLEC3B		NPTX1	TKT			IGKV2D-26	GSS	COL1A2		CTSL	PRDX6			IGKV2D-26	CXorf36	CALR		SEMA7A	KLKB1			IGLC3	MAPT	LGALS3BP		SEZ6L2	FGG			IGKV2D-29	GSS	SELENBP1		CNTN1	LGALS1			IGKV2D-26	CXorf36
CFL1		FAM3C				IGLC2	LDHC	OGN		PAM	ITIH2			IGKV2D-29	HPRT1	GRN		LSAMP	LGALS1			IGKV2D-29	FBLN7	CFL1		PRNP	FGA			SERPINA10	LDHC	PRDX6		DBI	HBB			IGKV3-15	HPRT1	HSPA5		LSAMP	TPT1			IGKV2D-29	FBLN7
NUCB1		CTSS				IGLC3	LDHAL6A	NUCB1		PIK3IP1	ARHGDIA			IGKV3-15	HSPA9	PRDX2		NCAM1	TPT1			IGKV2D-30	GALNS	ITIH2		FAM3C				CALML5	LDHAL6A	PRDX2		LSAMP	C4B			IGKV3D-7	HSPA9	GRN		NCAM1	IGHG2			IGKV2D-30	GALNS
OGN		CLU				SERPINA10	LAIR2	FMOD		ATP6AP1	DCN			IGKV3D-7	IMPA1	PRDX1		PIK3IP1	IGHM			IGKV3-20	GDI1	LGALS3BP		CLU				IGHD	LAIR2	IL1RAP		NBL1	CA1			P0DOX2	IMPA1	PRDX2		PIK3IP1	IGHM			IGKV3-20	GDI1
COL1A1		SEZ6L2				CALML5	LAIR1	PRDX2		NPC2	LUM			P0DOX2	IMPAD1	DCN		PTPRN2	PZP			PGLYRP2	GSR	CPN2		SEZ6L2				IGHV3-30	LAIR1	ACTG1		NCAM1	TKT			SERPINA4	IMPAD1	PRDX1		PRNP	PZP			PGLYRP2	GSR
ITIH2		APLP1				IGHD	IMPA1	ACTG1		PSAP	F12			SERPINA4	L1CAM	PHPT1		CST3	CA2			CFHR2	HS6ST3	B2M		APLP1				GPR37L1	IMPA1	EGFR		NELL2	ITIH2			TRIM3	L1CAM	DCN		PTPRN2	CA2			CFHR2	HS6ST3
CPN2		AGT				IGHV3-30	HPRT1	COL1A1		PTPRN2	SERPINA6			TRIM3	LAIR2	YWHAG		EFEMP1	GPX3			EDN3	ICAM5	CTSZ		AGT				H2BFS	HPRT1	TPT1		NPTX1	ARHGDIA			CFP	LAIR2	CTSS		TPI1	IL1RAP			EDN3	ICAM5
LRG1		SELENOP				GPR37L1	GOT2	TPT1		SCG3	VIM			CFP	LDHAL6A	LUM		SPARCL1	FGB			F9	IL18BP	ACTA1		SELENOP				HIST1H2BA	GOT2	LGALS1		PAM	F2			COL21A1	LDHAL6A	YWHAG		CST3	GPX3			F9	IL18BP
HP		SOD3				H2BFS	GMFG	LGALS1		SCG5	TPM2			COL21A1	LDHC	LRG1		B2M	ARHGDIA			FKBP2	IL1RAPL1	ACTG1		SOD3				HIST1H2BB	GMFG	PFN1		PIK3IP1	DCN			IGHV3-64	LDHC			SPARCL1	FGB			FKBP2	IL1RAPL1
ACTA1		IL1RAP				HIST1H2BA	GMFB	PFN1		SPARCL1	PHPT1			IGHG2	LFNG			NPPC	PFN1			IGHG1	IMPAD1	SERPINC1		CNTN1				HIST1H2BC	GMFB	GPX3		ATP6AP1	F12			IGKJ1	LFNG			NPPC	ARHGDIA			IGKJ1	IMPAD1
ACTG1		CNTN1				HIST1H2BB	GDI1	GPX3		SPOCK1	SELENBP1			IGHV3-64	LRRC4			NPC2	FGA			IGKJ1	KIAA1549L	PFN1		CLEC3B				HIST1H2BD	GDI1	ACTA1		NPC2	SELENBP1			IGKV2-24	LRRC4			NPC2	PFN1			IGKV4-1	KIAA1549L
SERPINC1		NRCAM				HIST1H2BC	GDA	COL1A2		SPOCK2				IGKJ1	MAPT			SCG3	CPN2			IGKV4-1	LAIR1	DCN		NRCAM				HIST1H2BH	GDA	PZP		PTPRN2				ICAM1	MAPT			SCG3	BLVRB			IGLV2-11	LAIR1
PFN1		NPPC				HIST1H2BD	GAP43	ACTA1		CNTN1				IGKV2-24	MARCKS			CTSB	HP			IGLV2-11	MARCKS	F2		NPPC				HIST1H2BJ	GAP43	CTSD		SCG3				IGHV3-23	MARCKS			QSOX1	FGA			IGLV3-19	MARCKS
DCN		IGFBP2				HIST1H2BH	FRZB	PZP		CTSB				ICAM1	MEGF10			NPTXR	OGN			IGLV3-19	MELTF	PRDX2		IGFBP2				HIST1H2BK	FRZB	TPPP3		SCG5				IGHV6-1	MEGF10			DKK3	CPN2			P0DOX5	MELTF
PRDX2		FBLN1				HIST1H2BJ	FKBP1A	TPPP3		GM2A				IGHV3-23	MGAT5			QSOX1	FGG			P0DOX5	NFASC	CP		FBLN1				HIST1H2BL	FKBP1A	GSTP1		SPARCL1				HS6ST1	MGAT5			NBL1	AZGP1			XAB2	NFASC
COL1A2		SCG5				HIST1H2BK	FCGR3A	GSTP1		SCG2				IGHV6-1	NAXE			DKK3	JCHAIN			XAB2	NOTCH1	TKT		SCG5				HIST1H2BM	FCGR3A	CTSZ		CNTN1				IGHV3-74	NAXE			PTGDS	EGFR			HGFAC	NOTCH1
TKT		PTGDS				HIST1H2BL	ENO2	BPGM		SEMA7A				HS6ST1	NDRG4			NBL1	CA1			HGFAC	NRN1	HSPA5		PTGDS				HIST1H2BN	ENO2	BPGM		GM2A				IGKV1-33	NDRG4			SCG2	CP			IGLL1	NRN1
HSPA5		IGF2				HIST1H2BM	EMILIN1			CTSS				IGHV3-74	NEFL			PTGDS	AK1			IGLL1	NRXN1	AZGP1		IGF2				HIST1H2BO	EMILIN1			SCG2				IGKV3-11	NEFL			AGT	FGG			ITM2C	NRXN1
FGG		GM2A				HIST1H2BN	DDAH1			B2M				IGKV1-33	NRGN			SCG2	ORM1			ITM2C	NRXN3	FGG		GM2A				HIST2H2BE	DDAH1			SEMA7A				IGKV3D-11	NRGN			ATP6AP1	CA1			SHBG	NRXN3
PRDX6		ATP6AP1				HIST1H2BO	COTL1			CHGB				IGKV3-11	NUTF2			AGT				SHBG	PCSK5	PRDX6		ATP6AP1				HIST2H2BF	COTL1			PCOLCE				METTL18	NUTF2			PCOLCE				TPM1	PCSK5
FGB		LSAMP				HIST2H2BE	CHI3L1			CNTN2				IGKV3D-11	NXPH1			ATP6AP1				TPM1	PLD3	GC		LSAMP				MYRF	CHI3L1			CHGB				EPHB3	NXPH1			CHGB				A1BG	PLD3
AHSG		C4B				HIST2H2BF	CAMK2D			ECM1				METTL18	PCDH7			LGALS3BP				A1BG	PRRT2	FGB		SERPING1				PDYN	CAMK2D			CNTN2				IGHV4-28	PCDH7			CSF1R				EPHA6	PRRT2
ORM1		SERPING1				MYRF	CAMK2A			EFEMP1				EPHB3	PCMT1			CHGB				EPHA6	RGMA	AHSG		DKK3				S100A6	CAMK2A			ECM1				ACOT12	PCMT1			PGK1				METTL18	RGMA
		DKK3				PDYN	CALM1			GSN				IGHV4-28	PEA15			CSF1R				METTL18	SLC39A10			NTM				EHBP1L1	CALM1			GSN				C4BPB	PEA15			APOE				MASP2	SLC39A10
		CTSD				S100A6	BASP1			DKK3				ACOT12	PGAM4			APOE				MASP2	SLITRK1			CRTAC1				HLA-C.P30505	BASP1			DKK3				DOCK10	PGAM4			GM2A				P0DOX7	SLITRK1
		NTM				EHBP1L1	AP2B1			EPDR1				C4BPB	PGM1			GM2A				P0DOX7	SPON1			HSPG2				HLA-C.Q9TNN7	AP2B1			EPDR1				IGHV1-18	PGM1			RELN				PON3	SPON1
		CST3				HLA-C.P30505	YWHAH			SELENOP				DOCK10	PLD3			CTSZ				PON3	ST8SIA3			NUCB1				MMP17	YWHAH			SELENOP				IGHV4-30-2	PLD3			SCG5				UACA	ST8SIA3
		PIK3IP1				HLA-C.Q9TNN7	WDR11			QSOX1				IGHV1-18	PMP2			SCG5				UACA	STMN1			CST3				COL21A1	WDR11			QSOX1				IGKV1-27	PMP2			SOD3				CD93	STMN1
		SPARC				MMP17	WBP2			PLTP				IGHV4-30-2	PPIAL4A			SOD3				CD93	TAGLN3			PIK3IP1				ITM2A	WBP2			PLTP				IGKV1-8	PPIAL4A			VGF				DES	TAGLN3
		ENPP2				COL21A1	VAPB			NPTXR				IGKV1-27	PRNP			VGF				DES	TGFBR2			OGN				RNASE3	VAPB			LY6H				IGKV1-9	PRRT2			CLEC3B				IGHV1-24	TGFBR2
		COCH				ITM2A	TXN			LGALS3BP				IGKV1-8	PRRT2			CTSA				IGHV1-24	VSTM2A			ENPP2				GINM1	TXN			PVALB				APOL1	RAD23B			HSPG2				IGHV1-46	VSTM2A
		SPARCL1				RNASE3	TNFRSF1A			LY6H				IGKV1-9	RAD23B			SPOCK1				IGHV1-46	ALDOC			COCH				H2AFV	TNFRSF1A			VGF				CD5L	RGMA			LY6H				PROZ	ALDOC
		FN1				GINM1	THBS4			PVALB				APOL1	RGMA			LY6H				PROZ	ATP6AP2			SPARCL1				H2AFZ	THBS4			CLEC3B				DISP1	RPS27A			PLTP				FZD2	ATP6AP2
		LGALS3BP				H2AFV	TBCA			VGF				CD5L	RPS27A			PLTP				FZD2	C14orf37			COL1A1				IGKV1-27	TBCA			CSF1R				IGLV3-27	RTN1			NUCB1				FZD7	C14orf37
		CSF1R				H2AFZ	TAGLN3			CSF1R				DISP1	RTN1			CTSD				FZD7	CELSR2			FN1				IGKV1-8	TAGLN3			OGN				PGLYRP2	SEMA4B			ECM1				GRB2	CELSR2
		QSOX1				IGKV1-27	SYT1			AGT				IGLV3-27	SEMA4B			ECM1				GRB2	CGREF1			CSF1R				IGKV1-9	SYT1			CADM4				ADAMTSL3	SERPINI1			FN1				IGLV1-47	CGREF1
		CHL1				IGKV1-8	RTN1			CPQ				PGLYRP2	SERPINI1			FN1				IGLV1-47	CHRD			RELN				NQO2	RTN1			NUCB1				CFHR2	SH3BGRL3			IGFBP4				IGLV2-8	CHRD
		CPQ				IGKV1-9	PLXDC2			IGFBP4				ADAMTSL3	SH3BGRL3			C4B				IGLV2-8	CLSTN3			QSOX1				PLGLA	PLXDC2			RELN				CRB2	SMOC1			PENK				IGLV4-3	CLSTN3
		B2M				NQO2	PLD3			APOE				CFHR2	SMOC1			IGFBP4				IGLV4-3	CRYM			CHL1				AMY2B	PLD3			AGT				DPP3	SNCG			FBLN1				KRT6A	CRYM
		CTSZ				PLGLA	PGK2			IGFBP2				CRB2	SNCG			PENK				KRT6A	ENPP5			CPQ				CDH12	PGK2			CPQ				HABP2	SOD2			CLU				OPTN	ENPP5
		NELL2				AMY2B	OMD			FN1				DPP3	SOD2			FBLN1				OPTN	FGFR2			NELL2				EMILIN3	OMD			IGFBP4				IGHA1	SORCS2			COCH				YWHAQ	FGFR2
		NPTX1				CDH12	NUTF2			IGF2				HABP2	SORCS2			CLU				YWHAQ	FUCA1			NPTX1				METRN	NUTF2			APOE				IGHV3-15	SPON1			CADM4				EXT1	FUCA1
		CHGA				EMILIN3	NPEPPSL1			APOD				IGHA1	SPON1			COCH				EXT1	GMFB			LRG1				ADAMTSL3	NPEPPSL1			IGFBP2				IGHV3-49	ST8SIA3			CPQ				IGHV3-7	GMFB
		IGFBP4				METRN	NAXE			COCH				IGHV3-15	ST8SIA3			CPQ				IGHV3-7	IL6ST			CHGA				H2AFX	NAXE			FN1				IGLV2-8	STMN1			SELENOP				PLGLA	IL6ST
		APOE				ADAMTSL3	MMP14			FBLN1				IGHV3-49	STMN1			SELENOP				PLGLA	LAIR2			CADM4				HBG1	MMP14			IGF2				LAMC3	STMN2			RNASE4				SERPINA10	LAIR2
		F2				H2AFX	LRP1			IL1RAP				IGLV2-8	STMN2			RNASE4				SERPINA10	LAMP1			IGFBP4				HBG2	LRP1			APOD				AMY1A	TAC3			PVALB				CAPG	LAMP1
		IGFBP6				HBG1	L1CAM			NME2				LAMC3	TAC3			PVALB				CAPG	LAMP2			APOE				HIST1H2AA	L1CAM			COCH				AMY2A	TAGLN3			APOD				COMP	LAMP2
		CP				HBG2	IGLV1-36			IGFBP6				AMY1A	TAGLN3			APOD				COMP	LINGO1			AKR1B1				HIST2H2AB	IGLV1-36			FBLN1				C5	TBCA			A2M				IGKV3-15	LINGO1
		CFH				HIST1H2AA	HTRA1			CFD				AMY2A	TBCA			SPARC				IGKV3-15	NCAN			CFH				IGKV1-17	HTRA1			NME2				C9	TMEM132A			MAN2B1				IGKV3D-7	NCAN
		CHGB				HIST2H2AB	HSPE1			RNASE4				C5	TMEM132A			A2M				IGKV3D-7	NDRG4			CHGB				IGKV3-15	HSPE1			HSPG2				IGKV1-16	TMSB10			HEXB				IGLV3-1	NDRG4
		NME2				IGKV1-17	GGCT			SERPINF1				C9	TMSB10			MAN2B1				IGLV3-1	NRGN			NME2				IGKV3D-7	GGCT			COL1A1				SERPINA10	TMSB4Y			SERPINF1				TUBA1A	NRGN
		NBL1				IGKV3-15	GAPDHS			ENPP2				IGKV1-16	TMSB4Y			HEXB				TUBA1A	NTNG1			NBL1				MDN1	GAPDHS			CFD				ADAMDEC1	TPD52			GPI				TUBA1B	NTNG1
		HEXB				IGKV3D-7	CXCL16			SOD3				SERPINA10	TPD52			IGFBP6				TUBA1B	NUTF2			HEXB				H2AFJ	EFEMP1			RNASE4				IGLC2	TXN			SERPING1				TUBA1C	NUTF2
		AZGP1				MDN1	CD44			SPARC				ADAMDEC1	TXN			SERPINF1				TUBA1C	OLFM1			PAM				HIST1H2AB	CXCL16			SERPINF1				IGLC3	UBA52			PCSK1N				ACOT12	OLFM1
		PAM				CFB	BLMH			SERPING1				IGLC2	UBA52			GPI				ACOT12	OMG			CFD				HIST1H2AC	CD44			ENPP2				MYRF	UBB			IGFBP2				ANXA1	OMG
		GC				H2AFJ	ALDOC			A2M				IGLC3	UBB			SERPING1				ANXA1	PCDH10			A2M				HIST1H2AD	BLMH			SOD3				TLN1	UBE2V1			COL1A1				DSC1	PCDH10
		CFD				HIST1H2AB	SYT2			CTSD				MYRF	UBE2V1			IGFBP2				CFB	PLXNA2			ORM1				HIST1H2AG	ALDOC			SERPING1				CCL14	UCHL1			TCN2				IGLC7	PLXNA2
		A2M				HIST1H2AC	ST8SIA3			HEXB				TLN1	UCHL1			TCN2				DSC1	PRKCSH			A2M				HIST1H2AH	SYT2			A2M				CRISP3	VSIG4			CFD				IGLV10-54	PRKCSH
						HIST1H2AD	SHISA4			CTSZ				CCL14	VSIG4			CFD				IGLC7	PTPRG			HEXB				HIST1H2AJ	ST8SIA3			HEXB				SERPINA5	VSTM2A			IGF2				TRIM3	PTPRG
						HIST1H2AG	RNASET2			TCN2				CRISP3	VSTM2A			IGF2				IGLV10-54	PTPRZ1			TCN2				HIST2H2AA3	SHISA4			TCN2				APOC2	WBP2			ENPP2				UNC5B	PTPRZ1
						HIST1H2AH	PRRT2							SERPINA5	WBP2			ENPP2				TRIM3	RGMB							HIST2H2AC	RNASET2							CDH5	YWHAB			PHPT1				IGKV2-24	RGMB
						HIST1H2AJ	NDRG4							APOC2	YWHAB			CTSS				UNC5B	RPS27A							HIST3H2A	PRRT2							COL12A1	YWHAH			LUM				KRT25	RPS27A
						HIST2H2AA3	MIA3							CDH5	YWHAH							IGKV2-24	SEMA6D							HSP90AA1	NDRG4							CTSC	YWHAZ			LRG1				POTEKP	SEMA6D
						HIST2H2AC	LIPA							COL12A1	YWHAZ							KRT25	SEZ6L							S100A7A	MIA3							IGLV3-19	ADGRB1							SPINT1	SEZ6L
						HIST3H2A	GSS							CTSC	ADGRB1							POTEKP	SYT2							VNN1	LIPA							SERPINA7	AGRN							WDR1	SYT2
						HSP90AA1	GSR							IGLV3-19	AGRN							SPINT1	TPD52							HLA-A.Q09160	GSS							TTN	ALCAM							APCS	TPD52
						S100A7A	FCGR3B							SERPINA7	ALCAM							WDR1	UBA52							IGLV9-49	GSR							GPNMB	ART3							APOL1	UBA52
						VNN1	FABP7							TTN	ART3							APCS	UBB							KIAA0319L	FCGR3B							IGLV8-61	B4GALT1							IGHV3-64D	UBB
						HLA-A.Q09160	DLD							CAT	B4GALT1							APOL1	ADCYAP1							TGM4	FABP7							NHLRC3	BTD							IGLV8-61	ADCYAP1
						IGLV9-49	COL15A1							GPNMB	BTD							IGHV3-64D	ADGRB2							GALNTL6	DLD							PPM1L	C14orf37							FRAS1	ADGRB2
						KIAA0319L	TK2							IGLV8-61	C14orf37							IGLV8-61	ADGRB3							IGKV2D-30	COL15A1							PRG2	CACNA2D1							ICAM1	ADGRB3
						TGM4	STX12							NHLRC3	CACNA2D1							FRAS1	ADGRL3							PANX2	TK2							APOC1	CALY							IGKV1-27	ADGRL3
						GALNTL6	PTN							PPM1L	CALY							ICAM1	B4GAT1							IGLV2-11	STX12							DSP	CANX							IGKV1-8	B4GAT1
						IGKV2D-30	MAG							PRG2	CANX							IGKV1-27	CA11							S100A7	SPOCK2							NGFR	CCDC126							IGKV1-9	CA11
						PANX2	LMAN1							APOC1	CCDC126							IGKV1-8	CAMK2B							ADAMDEC1	PTN							NLGN3	CD99L2							ITIH4	CAMK2B
						IGLV2-11	KCTD12							DSP	CD99L2							IGKV1-9	CAMK2G							HLA-C.P04222	MAG							AQP1	CDH18							CFHR3	CAMK2G
						S100A7	HSPA9							NGFR	CDH18							CAT	CBLN4							PCSK1	LMAN1							CD81	CDH4							FABP5	CBLN4
						ADAMDEC1	HK1							NLGN3	CDH4							CFHR3	CD99L2							TUBA1A	KCTD12							IGHV1-58	CHST10							FAH	CD99L2
						HLA-C.P04222	GLRX							AQP1	CHST10							FABP5	CDH13							TUBA1B	HSPA9							IGLV7-46	COLEC12							GALNTL6	CDH13
						PCSK1	FBLN7							CD81	COLEC12							FAH	CSF1							TUBA1C	HK1							TXNDC5	CRYM							SPINK1	CSF1
						TUBA1A	ECM2							IGHV1-58	CRTAC1							GALNTL6	DPP7							FAM171A1	GLRX							APMAP	CSF1							ANXA2P2	DPP7
						TUBA1B	CSTB							IGLV7-46	CRYM							SPINK1	DTD1							HLA-C.P30501	FBLN7							S100A6	CSTB							ITIH1	DTD1
						TUBA1C	CPLX2							TXNDC5	CSF1							ANXA2P2	EFNA3							IGKV3-20	ECM2							SERPINB1	DAG1							PRPH	EFNA3
						FAM171A1	ATOX1							APMAP	CSTB							PRPH	EXTL2							IGLV2-14	CSTB							ANGPTL6	DPP10							H2AFV	EXTL2
						HLA-C.P30501	VAPA							S100A6	DAG1							H2AFV	FBLN2							SST	CPLX2							APOC3	DPP6							H2AFZ	FBLN2
						IGKV3-20	TMEM132A							SERPINB1	DPP10							H2AFZ	GFRA2							STAB1	ATOX1							CBR3	DPT							LINGO3	GFRA2
						IGLV2-14	SORCS2							ANGPTL6	DPP6							LINGO3	GRIA4							VWF	VAPA							EXT2	DPYSL2							CEMIP	GRIA4
						SST	SH3BGRL							APOC3	DPT							CEMIP	IMPA1							HLA-C.Q07000	TMEM132A							IGHG4	EPHA5							HIST1H2AB	IMPA1
						STAB1	PLXNA2							CBR3	DPYSL2							HIST1H2AB	ISLR2							HSPA7	SORCS2							ITIH1	EXTL2							HIST1H2AC	ISLR2
						VWF	PALM							EXT2	EPHA5							HIST1H2AC	KIAA0319							IGHV6-1	SH3BGRL							DCBLD2	FAM19A5							HIST1H2AD	KIAA0319
						HLA-C.Q07000	MGAT5							IGHG4	EXTL2							HIST1H2AD	LRP1							APMAP	PLXNA2							IGHV4-31	FBLN7							HIST1H2AG	LRP1
						HSPA7	MASP1							DCBLD2	FAM19A5							HIST1H2AG	MANSC1							CD74	PALM							IGLV3-10	GAPDHS							HIST1H2AH	MANSC1
						IGHV6-1	LAMP2							IGHV4-31	FBLN7							HIST1H2AH	MAPT							COL12A1	MGAT5							ITIH4	GLA							HIST1H2AJ	MAPT
						APMAP	LAMP1							IGLV3-10	GAPDHS							HIST1H2AJ	MEGF10							CPM	MASP1							PON1	HEG1							HIST2H2AA3	MEGF10
						CD74	COLEC12							PON1	GLA							HIST2H2AA3	MGAT5							HSPA6	LAMP2							COL4A1	HEPACAM							HIST3H2A	MGAT5
						COL12A1	CHRD							COL4A1	HEG1							HIST3H2A	MT1A							JCHAIN	LAMP1							MIA	HFE2							IGKV3-11	MT1A
						CPM	VCAM1							MIA	HEPACAM							IGKV3-11	MT1G							PCDHGC5	COLEC12							MYH9	HLA-C.P30499							IGKV3D-11	MT1G
						HSPA6	PTPRZ1							MYH9	HFE2							IGKV3D-11	MT1H							CPB2	CHRD							POSTN	HLA-G							LDLRAD3	MT1H
						PCDHGC5	PCOLCE							POSTN	HLA-C.P30499							LDLRAD3	MT1X							FABP5	VCAM1							SBSN	HS6ST3							NPNT	MT1X
						CPB2	FUT11							SBSN	HLA-G							NPNT	MT2A							FCN3	PTPRZ1							C4BPA	HSP90B2P							H2AFJ	MT2A
						FABP5	C4A							C4BPA	HS6ST3							H2AFJ	NEO1							COL4A2	FUT11							CD99	HTRA1							H2AFX	NEO1
						FCN3	BTD							CD99	HSP90B2P							H2AFX	NPTN							EPHB3	C4A							CETP	HYOU1							HIST1H2AA	NPTN
						COL4A2	B4GALT1							CETP	HTRA1							HIST1H2AA	NXPH2							GALNT5	BTD							COL5A1	ICAM5							HIST2H2AB	NXPH2
						EPHB3	ART3							COL5A1	HYOU1							HIST2H2AB	PALM							IL6R	B4GALT1							EGLN2	KLK6							HIST2H2AC	PALM
						GALNT5	A8MTW9							EGLN2	ICAM5							HIST2H2AC	PCDH9							CBR3	ART3							IGLV1-47	LAIR1							HPR	PCDH9
						IL6R	SCN2B							IGLV1-47	KLK6							HPR	PCDHGC3							CDH9	A8MTW9							PLGLA	LAMP2							IGLV1-44	PCDHGC3
						CBR3	PCDH8							PLGLA	LAIR1							IGLV1-44	PLXDC2							CTSC	SPOCK1							SDC4	LRP1							ITGBL1	PLXDC2
						CDH9	PAPLN							SDC4	LAMP2							ITGBL1	QDPR							IGKV1-12	SCN2B							CD82	MAG							METRNL	QDPR
						CTSC	LRRC4							CD82	LRP1							METRNL	SERPINI1							IGKV1-39	PCDH8							HLA-B.P10319	MGAT1							EXTL1	SERPINI1
						IGKV1-12	DPT							HLA-B.P10319	MAG							EXTL1	SKP1							IGKV1-6	PAPLN							HLA-B.P18465	MINPP1							FABP4	SKP1
						IGKV1-39	DNAJC3							HLA-B.P18465	MGAT1							FABP4	SLIT1							IGKV1D-12	LRRC4							HLA-B.P30464	MT3							C2	SLIT1
						IGKV1-6	SRPX							HLA-B.P30464	MINPP1							C2	SYT1							KIAA0319	DPT							HLA-B.P30484	NCAM2							C2orf40	SYT1
						IGKV1D-12	SGCE							HLA-B.P30484	MT3							C2orf40	TMEM132A							PRRG1	DNAJC3							HLA-B.P30491	NCAN							CLIC1	TMEM132A
						KIAA0319	SERPINA3							HLA-B.P30491	NCAM2							CLIC1	TMEM132C							TPBG	SRPX							HLA-B.P30685	NEO1							DNAJB11	TMEM132C
						PRRG1	NUDC							HLA-B.P30685	NCAN							DNAJB11	TNFRSF21							CNTN5	SGCE							HYI	NPEPPSL1							ELFN2	TNFRSF21
						TPBG	NPEPPS							HYI	NEO1							ELFN2	YIPF3							COL5A1	SERPINA3							IGHV1-69	NRXN1							EXT2	YIPF3
						CNTN5	MENT							IGHV1-69	NPEPPSL1							EXT2	ATP1B2							HLA-C.Q29865	NUDC							IGLV1-44	NRXN3							HABP2	ATP1B2
						COL5A1	LTBP3							IGLV1-44	NRXN1							HABP2	CAMK2D							IGKV2D-26	NPEPPS							P0DOX8	OMD							S100A8	CAMK2D
						HLA-C.Q29865	LILRB4							P0DOX8	NRXN3							S100A8	CD44							WSCD2	MENT							PDE3A	PCDH1							DSP	CD44
						IGKV2D-26	IGHV2-70D							PDE3A	OMD							DSP	COTL1							IGKV2-29	LTBP3							DEFA1	PCDH10							HSP90AA1	COTL1
						WSCD2	IGHV1-3							DEFA1	PCDH1							HSP90AA1	CRTAC1							IGKV2D-29	LILRB4							DEFA3	PCDH9							IGLV4-69	CTSK
						IGKV2-29	GLOD4							DEFA3	PCDH10							IGLV4-69	CTSK							KLK11	IGHV2-70D							IGKV1-12	PDGFA							SLC4A1	CTSL3P
						IGKV2D-29	FAIM2							IGKV1-12	PCDH9							SLC4A1	CTSL3P							NGFR	IGHV1-3							IGKV1-39	PGK2							CETP	CTSV
						KLK11	F10							IGKV1-39	PDGFA							CETP	CTSV							PIP	GLOD4							IGKV1-6	PIANP							DCBLD2	DAG1
						NGFR	DTD1							IGKV1-6	PGK2							DCBLD2	DAG1							TRIM3	FAIM2							IGKV1D-12	PITHD1							GZMH	DPP10
						PIP	DGCR2							IGKV1D-12	PIANP							GZMH	DPP10							C1RL	F10							IGKV6-21	PLXNA2							NOTCH3	DPP6
						TRIM3	CHI3L2							IGKV6-21	PITHD1							NOTCH3	DPP6							CHMP4A	DTD1							KRT6A	PPIAL4C							C5	ENDOD1
						C1RL	CD14							KRT6A	PLXNA2							C5	ENDOD1							HLA-C.Q29963	DGCR2							MDN1	PPIAL4D							MSN	EPHA4
						CHMP4A	SPOCK3							MDN1	PPIAL4C							MSN	EPHA4							IGLV8-61	CHI3L2							METRNL	PPIAL4E							POTEE	EPHB6
						HLA-C.Q29963	SMPDL3A							METRNL	PPIAL4D							POTEE	EPHB6							LILRA2	CD14							IGHV3-13	PPIAL4G							POTEF	FAM198B
						IGLV8-61	RMDN3							IGHV3-13	PPIAL4E							POTEF	FAM198B							OLFML1	SPOCK3							IGLL5	PTPRS							ABHD14A	FCGR3A
						LILRA2	PITHD1							IGLL5	PPIAL4G							ABHD14A	FCGR3A							PTPRK	SMPDL3A							LPA	RGMB							COL4A2	GOT2
						OLFML1	DSC2							LPA	PTPRS							COL4A2	GOT2							IGHV3-13	RMDN3							C1QTNF1	RNASE6							EPHB3	HK1
						PTPRK	CHIT1							C1QTNF1	RGMB							EPHB3	HK1							SAA1	PITHD1							HLA-DPB1	ROBO1							IGHV3-23	HYOU1
						IGHV3-13	CAMK2G							HLA-DPB1	RNASE6							IGHV3-23	HYOU1							ATF6B	DSC2							HLA-DRB1	S100A1							IGLV3-16	IGHV1-3
						SAA1	C1QTNF5							HLA-DRB1	ROBO1							IGLV3-16	IGHV1-3							CFHR3	CHIT1							HLA-DRB1.P01912	SEMA3A							PLGLB1	KLK6
						ATF6B	ALDOB							HLA-DRB1.P01912	S100A1							PLGLB1	KLK6							CLIC1	CAMK2G							HLA-DRB1.P20039	SEZ6L							POTEI	LRP11
						CFHR3	ADIPOQ							HLA-DRB1.P20039	SEMA3A							POTEI	LRP11							EMILIN2	C1QTNF5							HLA-DRB1.Q5Y7A7	SGCE							ACTB	LRTM2
						CLIC1	TGFBR2							HLA-DRB1.Q5Y7A7	SEZ6L							ACTB	LRTM2							FLNA	ALDOB							HLA-DRB1.Q95IE3	SLC39A10							C8G	LUZP2
						EMILIN2	SCN4B							HLA-DRB1.Q95IE3	SGCE							C8G	LUZP2							IGFBPL1	ADIPOQ							IGLC1	SLIT1							COL12A1	MSLN
						FLNA	RNASE6							IGLC1	SLC39A10							COL12A1	MSLN							IGLV1-44	TGFBR2							MFAP2	SLITRK1							IGLV3-9	NEGR1
						IGFBPL1	NRXN2.P58401							MFAP2	SLIT1							IGLV3-9	NEGR1							KLK7	SCN4B							PPBP	STMN4							ACTA2	OLFML3
						IGLV1-44	NID1							PPBP	SLITRK1							ACTA2	OLFML3							SAA2	RNASE6							SERPINA1	SYT1							ACTC1	PHLDB3
						KLK7	MOG							SERPINA1	STMN4							ACTC1	PHLDB3							CAPG	NRXN2.P58401							TAC1	TEX15							ACTG2	POMGNT1
						SAA2	IL18BP							TAC1	SYT1							ACTG2	POMGNT1							HLA-G	NID1							A1BG	TGFBR2							H2BFS	PTN
						CAPG	DAG1							A1BG	TEX15							H2BFS	PTN							IGHV3-43D	MOG							ANXA1	THBS4							HIST1H2BA	QPCT
						HLA-G	CTSO							ANXA1	TGFBR2							HIST1H2BA	QPCT							IGHV3-9	IL18BP							CEL	TMEFF1							HIST1H2BB	RTN4RL2
						IGHV3-43D	ACYP1							CEL	THBS4							HIST1H2BB	RTN4RL2							DEFA1	DAG1							MASP2	TNFRSF21							HIST1H2BC	SCN2B
						IGHV3-9	SLITRK3							MASP2	TMEFF1							HIST1H2BC	SCN2B							DEFA3	CTSO							ACAN	UNC5C							HIST1H2BD	SEMA4B
						DEFA1	PIGR							ACAN	TNFRSF21							HIST1H2BD	SEMA4B							FUCA2	ACYP1							C2	VAMP1							HIST1H2BH	SIL1
						DEFA3	OLFML3							C2	UNC5C							HIST1H2BH	SIL1							HLA-H	SLITRK3							EXT1	VAMP2							HIST1H2BJ	SORCS2
						FUCA2	GNPTG							EXT1	VAMP1							HIST1H2BJ	SORCS2							IGHV3-7	PIGR							GSE1	VAMP3							HIST1H2BK	SORCS3
						HLA-H	FAP							GSE1	VAMP2							HIST1H2BK	SORCS3							CEL	OLFML3							HGFAC	ADGRB3							HIST1H2BL	SPOCK2
						IGHV3-7	FAM19A5							HGFAC	VAMP3							HIST1H2BL	STK31							IGLV3-10	GNPTG							IGKV3D-15	ALDOB							HIST1H2BM	STK31
						CEL	DPYSL2							IGKV3D-15	ADGRB3							HIST1H2BM	SUSD5							IGLC7	FAP							IGLV2-11	ATP6AP2							HIST1H2BN	SUSD5
						IGLV3-10	DPP6							IGLV2-11	ALDOB							HIST1H2BN	TEX15							DES	FAM19A5							JCHAIN	B3GALNT1							HIST1H2BO	TEX15
						IGLC7	CEND1							THBS1	ATP6AP2							HIST1H2BO	TYRO3							IGKV3-11	DPYSL2							THBS1	B4GAT1							HIST2H2BE	TYRO3
						DES	CANX							KRT5	B3GALNT1							HIST2H2BE	ADAM23							IGKV3D-11	DPP6							KRT5	BDNF							HIST2H2BF	ADAM23
						IGKV3-11	TGFBI							KRT6C	B4GAT1							HIST2H2BF	AP2A2							IGLV1-47	CEND1							KRT6C	C11orf87							HIST3H2BB	AP2A2
						IGKV3D-11	TAGLN							SUN3	BDNF							HIST3H2BB	AXL							KRT6C	CANX							SUN3	CADM2							LCP1	AXL
						IGLV1-47	SF3A1							C6	C11orf87							LCP1	BCAM							MYOC	TGFBI							C6	CADM3							SERPINA5	BCAM
						KRT6C	S100B							IGLV1-51	CADM2							SERPINA5	BSG							SRGN	TAGLN							IGLV1-51	CANT1							ACACA	BSG
						MYOC	RARRES2							PANX2	CADM3							ACACA	C16orf89							ALDH1A1	SF3A1							PANX2	CDH6							CFHR1	C16orf89
						SRGN	PLD4							COMP	CANT1							CFHR1	CADM2							BGN	S100B							COMP	CLASRP							FCN3	CADM2
						ALDH1A1	PEA15							IGHV1-46	CDH6							FCN3	CD55							CD93	RARRES2							IGHV1-46	CNTN3							IGHV4-31	CD55
						BGN	PCMT1							LBP	CLASRP							IGHV4-31	CD59							COMP	PLD4							LBP	CNTN4							IGLV9-49	CD59
						CD93	NRXN1							PCDHGB7	CNTN3							IGLV9-49	CNR1							EXTL1	PEA15							PCDHGB7	COL6A1							CLEC11A	CNR1
						COMP	NOTCH2							S100A8	CNTN4							CLEC11A	CNTNAP4							IGKV4-1	PCMT1							S100A8	CUTA							COL5A1	CNTNAP4
						EXTL1	IMPAD1							XAB2	COL6A1							COL5A1	DNER							MDGA1	NRXN1							XAB2	DLD							CSRP1	DNER
						IGKV4-1	HSP90B2P							FERMT3	CUTA							CSRP1	EPHA5							POMC	NOTCH2							FERMT3	ECM2							HBG1	EPHA5
						MDGA1	CENPF							IGLV9-49	DLD							HBG1	FOLR2							APOC3	IMPAD1							IGLV9-49	EDIL3							HBG2	FOLR2
						POMC	CALCA.P06881							FLNA	ECM2							HBG2	FSTL4							CD5L	HSP90B2P							FLNA	ENPP4							HSPB1	FSTL4
						APOC3	CALCA							FURIN	EDIL3							HSPB1	FSTL5							IGHG3	CENPF							FURIN	EPHA4							IGHV2-70	FSTL5
						CD5L	C7							IGHV3-43	ENPP4							IGHV2-70	FUCA2							ANPEP	CALCA.P06881							IGHV3-43	GAS6							S100A4	FUCA2
						IGHG3	ATP1B2							IGKV1-13	EPHA4							S100A4	GMFG							HIST1H4A	CALCA							IGKV1-13	GFRA2							AHNAK	GMFG
						ANPEP	AEBP1							KLK11	GAS6							AHNAK	GPC4							HLA-DPB1	C7							KLK11	HLA-C.P04222							ORM2	GPC4
						HIST1H4A	SNCB							ANXA2P2	GFRA2							ORM2	HSP90B1							HLA-DRB1	ATP1B2							ANXA2P2	HLA-C.Q29865							ABCB9	HSP90B1
						HLA-DPB1	SNCA							CSTA	HLA-C.P04222							ABCB9	IDS							HLA-DRB1.P01912	AEBP1							CSTA	HLA-H							ACTBL2	IDS
						HLA-DRB1	SELPLG							IGLV3-1	HLA-C.Q29865							ACTBL2	IGSF21							HLA-DRB1.P20039	SNCB							IGLV3-1	HS6ST2							ACVR1B	IGSF21
						HLA-DRB1.P01912	QDPR							MMP17	HLA-H							ACVR1B	LMAN1							HLA-DRB1.Q5Y7A7	SNCA							MMP17	HSP90B1							DEFA1	LMAN1
						HLA-DRB1.P20039	PEPD							IGHV1-24	HS6ST2							DEFA1	LRRC4							HLA-DRB1.Q95IE3	SELPLG							IGHV1-24	HSPE1							DEFA3	LRRC4
						HLA-DRB1.Q5Y7A7	MST1L							IGLV4-3	HSP90B1							DEFA3	MEGF8							PRELP	QDPR							IGLV4-3	IL6ST							DSC3	MEGF8
						HLA-DRB1.Q95IE3	HSP90B1							LILRA2	HSPE1							DSC3	MEGF9							APOC2	PEPD							LILRA2	LAMP1							SELENON	MEGF9
						PRELP	GALNS							MYL6	IL6ST							SELENON	MGAT2							CD99	MST1L							MYL6	LMAN1							SUN3	MGAT2
						APOC2	CSF1							APOM	LAMP1							SUN3	MIA3							FAM198A	HSP90B1							APOM	LRRC4B							TTN	MIA3
						CD99	ANGPTL7							C8G	LMAN1							TTN	NCAM2							HLA-C.P30499	GALNS							C8G	MLEC							DNAAF1	NCAM2
						FAM198A	RGMA							SHBG	LRRC4B							DNAAF1	OPCML							IGHV3-72	CSF1							HP	MOG							F10	OPCML
						HLA-C.P30499	MT3							SRGN	MLEC							F10	PCSK6							VSTM2B	ANGPTL7							SHBG	MT1A							IDH1	PCSK6
						IGHV3-72	LRRC4B							FABP4	MOG							IDH1	PNOC							ERLEC1	RGMA							SRGN	MT1G							IGHV5-51	PNOC
						VSTM2B	HDHD2							LSR	MT1A							IGHV5-51	PRNP							IGHV4-31	MT3							FABP4	MT1H							CRABP1	PTPRS
						ERLEC1	GLG1							ASTN1	MT1G							CRABP1	PTPRS							IGLL1	LRRC4B							LSR	MT1X							EEF1A1	RCN2
						IGHV4-31	GALNT2							IGLL1	MT1H							EEF1A1	RCN2							CRHBP	HDHD2							ASTN1	MT2A							EEF1A1P5	SORCS1
						IGLL1	DISP3							KRT27	MT1X							EEF1A1P5	SORCS1							HLA-C.P10321	GLG1							IGLL1	NEDD8							IGHV3-15	TMEM132D
						CRHBP	CD99L2							KRT28	MT2A							IGHV3-15	TMEM132D							PLD5	GALNT2							KRT27	NEGR1							IGHV3-43D	VLDLR
						HLA-C.P10321	WFIKKN1							ACACA	NEDD8							IGHV3-43D	VLDLR							CHST8	DISP3							KRT28	NPEPPS							IGHV3-9	WDR11
						PLD5	PRKCSH							CRHBP	NEGR1							IGHV3-9	WDR11							HAPLN2	CD99L2							ACACA	NSF							THBS1	ADGRL1
						CHST8	PRDX4							MANF	NPEPPS							THBS1	ADGRL1							IGLV2-8	WFIKKN1							CRHBP	NSG1							TMED4	CA4
						HAPLN2	PCSK6							P0DOX5	NSF							TMED4	CA4							F13A1	PRKCSH							MANF	PAPLN							CD5L	CHST10
						IGLV2-8	NSF							SPINT1	NSG1							CD5L	CHST10							IGHV4-30-2	PRDX4							P0DOX5	PCDH8							CD9	COL14A1
						F13A1	MGAT2							COL28A1	PAPLN							CD9	COL14A1							IGKV1-5	PCSK6							SPINT1	PDIA6							CHST8	COLEC12
						IGHV4-30-2	MAN1C1							DES	PCDH8							CHST8	COLEC12							AHNAK	NSF							COL28A1	PLD4							EGLN2	CSPG5
						IGKV1-5	LTA4H							FAM234B	PDIA6							EGLN2	CSPG5							EDN3	MGAT2							DES	POMGNT1							F13A1	EFEMP1
						AHNAK	LAMP5							HBZ	PLD4							F13A1	FBLN5							GALNT16	MAN1C1							FAM234B	PRKCSH							HIST1H4A	FBLN5
						EDN3	AP1B1							HPR	POMGNT1							HIST1H4A	GALNT2							OPTN	LTA4H							HBZ	PRRT3							IGLC2	GALNT2
						GALNT16	VAMP3							IGHG1	PRKCSH							IGLC2	IFNAR2							PCP4	LAMP5							HPR	PTPRZ1							IGLC3	IFNAR2
						OPTN	VAMP1							LCN2	PRRT3							IGLC3	LMAN2							B4GALNT1	AP1B1							LCN2	RIDA							MST1L	LMAN2
						PCP4	TMEM132C							APOB	PTPRZ1							MST1L	LRRC4B							CRABP1	VAMP3							APOB	SEC62							NGFR	LRRC4B
						B4GALNT1	STX1B							EPHA6	RIDA							NGFR	MINPP1							IGHV1-58	VAMP1							EPHA6	SEMA6D							P0DOX8	MINPP1
						CRABP1	RIDA							FAM241B	SEC62							P0DOX8	MLEC							JAG1	TMEM132C							FAM241B	SH3BGRL							S100A7A	MLEC
						IGHV1-58	RBP3							HBB	SEMA6D							S100A7A	MOG							BST1	STX1B							IGHV4-30-4	SHISA5							SERPINA7	MOG
						JAG1	PPIC							IGHV4-30-4	SH3BGRL							SERPINA7	MYDGF							MARS	RIDA							IGHV4-34	SPOCK3							AKR1B15	MYDGF
						BST1	IL6ST							IGHV4-34	SHISA5							AKR1B15	NCSTN							MFRP	RBP3							IGHV4-38-2	SULF2							ELN	NCSTN
						MARS	GPC4							IGHV4-38-2	SPOCK3							ELN	NRXN2							TTLL6	PPIC							IGHV4-39	TALDO1							IGHG3	NRXN2
						MFRP	ENPP4							IGHV4-39	SULF2							IGHG3	NXPH1							FBN2	IL6ST							IGHV4-59	UNC5D							IGKV3D-20	NXPH1
						TTLL6	ENDOD1							IGHV4-59	TALDO1							IGKV3D-20	PCDH17							SHISA8	GPC4							IGHV4-61	VAPA							IGKV6-21	PCDH17
						FBN2	CPB1							IGHV4-61	UNC5D							IGKV6-21	PRRT3							ACOT12	ENPP4							ITGBL1	ACE							KRT17	PRRT3
						SHISA8	CNTNAP2							ITGBL1	VAPA							KRT17	SCN3B							IGHV1-2	ENDOD1							ITIH3	ADAM22							SBSN	SCN3B
						ACOT12	CLEC11A							ITIH3	ACE							SBSN	SLITRK3							IGLV1-51	CPB1							PON3	ADGRB2							TGM4	SLITRK3
						IGHV1-2	CDH4							PON3	ADAM22							TGM4	ADAM22							PROCR	CNTNAP2							S100A4	ASPH							CBR3	ADAM22
						IGLV1-51	ALCAM							S100A4	ADGRB2							CBR3	ADGRB1							SYT11	CLEC11A							TMED4	B3GNT2							CD74	ADGRB1
						PROCR	ADIRF							TMED4	ASPH							CD74	AGRN							TMEM178A	CDH4							CD74	B4GALT5							CDH3	AGRN
						SYT11	YIPF3							CD74	B3GNT2							CDH3	ANGPTL7							B3GAT3	ALCAM							DSC3	BSG							COL28A1	ANGPTL7
						TMEM178A	VSTM2A							DSC3	B4GALT5							COL28A1	C1QTNF4							CDH22	ADIRF							FXYD6	C4orf48							DSG1	C1QTNF4
						B3GAT3	TNC							FXYD6	BSG							DSG1	CBLN2							COL28A1	YIPF3							SELENON	CAMK2D							IGHV3-13	CBLN2
						CDH22	TGFBR3							SELENON	C4orf48							IGHV3-13	COL6A1							IGHV3-64D	VSTM2A							VNN1	CASC4							IGHV4-4	COL6A1
						COL28A1	TEX15							VNN1	CAMK2D							IGHV4-4	CPB1							CALY	TNC							ANG	CENPF							IGLC1	CPB1
						IGHV3-64D	SEMA6D							ANG	CASC4							IGLC1	DNAH5							IGFBP7	TGFBR3							SELL	CGREF1							IGLL5	DNAH5
						CALY	PRKAR1A							SELL	CENPF							IGLL5	EFNB2							IGHV1-24	TEX15							TPP1	CTSK							PANX2	EFNB2
						IGFBP7	PI16							TPP1	CGREF1							PANX2	FAM19A5							PRPH	SEMA6D							CD93	CTSL3P							CST6	FAM19A5
						IGHV1-24	PEBP4							CD93	CTSK							CST6	GAA							LRP8	PRKAR1A							HBA1	CTSV							IGKV1-12	GAA
						PRPH	PCDH9							HBA1	CTSL3P							IGKV1-12	GALNT18							SERPINB1	PI16							IGLV6-57	EFNA3							IGKV1-39	GALNT18
						LRP8	OLFM1							IGLV6-57	CTSV							IGKV1-39	GLOD4							COL4A1	PEBP4							AMY2B	EPHA10							IGKV1-6	GLOD4
						SERPINB1	NSG1							AMY2B	EFNA3							IGKV1-6	HEG1							IGHV1-69	PCDH9							CLIC1	FSTL4							IGKV1D-12	HEG1
						COL4A1	MGAT1							CLIC1	EPHA10							IGKV1D-12	HSP90B2P							MAN1B1	OLFM1							TNC	GALNT7							CDH5	HSP90B2P
						EGFR	IGFBP5							TNC	FSTL4							CDH5	MAN2A2							KRT6A	NSG1							TXNDC17	GRIA4							GPM6A	MAN2A2
						IGHV1-69	FUT8							TXNDC17	GALNT7							GPM6A	NELL1							B3GNT9	MGAT1							CPXM2	HLA-C.P10321							IGHV4-28	NELL1
						MAN1B1	ELN							CPXM2	GRIA4							IGHV4-28	PPP5C							CA10	IGFBP5							FAT1	HLA-C.P30501							MST1	PPP5C
						KRT6A	SLITRK4							FAT1	HLA-C.P10321							MST1	SEMA3G							PLGLB1	FUT8							NOTCH2NL	HLA-C.Q07000							SLC5A5	SEMA3G
						B3GNT9	PRNP							NOTCH2NL	HLA-C.P30501							SLC5A5	SORT1							ADAMTS8	ELN							SCGB1A1	IDS							VCL	SORT1
						CA10	PCSK5							SCGB1A1	HLA-C.Q07000							VCL	SUMO2							CHST3	SLITRK4							TNNI3K	IFNAR2							CRB2	SUMO2
						PLGLB1	OLFM2							TNNI3K	IDS							CRB2	SUMO3							ATP1A2	PCSK5							CD46	IGSF8							ING2	SUMO3
						ADAMTS8	MAN2A1							CD46	IFNAR2							ING2	SUMO4							CD9	OLFM2							HBEGF	LMAN2							ANPEP	SUMO4
						CHST3	HEPACAM							HBEGF	IGSF8							ANPEP	TAC3							CFP	MAN2A1							HSPA7	LRTM2							CYTL1	TAC3
						ATP1A2	GAA							HSPA7	LMAN2							CYTL1	TGOLN2							F13B	HEPACAM							IGKV1-5	MANSC1							DMKN	TGOLN2
						CD9	FSCN1							IGKV1-5	LRTM2							DMKN	VASN							IGLV3-9	GAA							KRT222	MEGF8							IGLV3-12	VASN
						CFP	CXADR							KRT222	MANSC1							IGLV3-12	B3GNT2							MXRA7	FSCN1							MELTF	MGAT3							CCL14	B3GNT2
						F13B	C14orf37							MELTF	MEGF8							AKR1B1	BLMH							S1PR1	CXADR							PRRG1	NFASC							CD46	BLMH
						IGLV3-9	WFIKKN2							PRRG1	MGAT3							CCL14	CDH18							TPM1	C14orf37							SHISA8	NRXN2.P58401							JUP	CDH18
						MXRA7	VWA1							SHISA8	NFASC							CD46	ESAM							APOC1	WFIKKN2							YWHAQ	OMG							KLK11	ESAM
						S1PR1	TAC3							YWHAQ	NRXN2.P58401							JUP	LYNX1							CDH8	VWA1							KRT2	OPCML							IGFBP7	LYNX1
						TPM1	S100A1							KRT2	OMG							KLK11	MAG							DSC1	TAC3							F13A1	PLXDC2							IGHV1-18	MAG
						APOC1	PLXNB2							F13A1	OPCML							IGFBP7	MAN1A1							MASP2	S100A1							LYZ	SCN3B							PCSK9	MAN1A1
						CDH8	PDGFA							LYZ	PLXDC2							IGHV1-18	MASP1							P0DOX2	PLXNB2							VNN3	SHISA4							SERPINA1	MASP1
						DSC1	DNAH5							VNN3	SCN3B							PCSK9	MDGA2							UACA	PDGFA							CHST8	SIRPB1							CALU	MDGA2
						MASP2	CTSV							CHST8	SHISA4							SERPINA1	MMP7							ARHGEF18	DNAH5							HBD	SORCS1							DDAH2	MMP7
						P0DOX2	CTSL3P							HBD	SIRPB1							CALU	OMD							CAP1	CTSV							HSPA6	SORCS3							ENTPD6	OMD
						UACA	CTSK							HSPA6	SORCS1							DDAH2	PCDH7							CEMIP	CTSL3P							NQO2	SORT1							IGKV1-13	PCDH7
						ARHGEF18	CRELD1							NQO2	SORCS3							ENTPD6	PCMT1							CFHR1	CTSK							PPT1	SPOCK1							IGKV1-33	PCMT1
						CAP1	CLIC4							PPT1	SORT1							IGKV1-13	PEBP4							GANAB	CRELD1							SAA4	SPOCK2							MFRP	PEBP4
						CEMIP	B4GAT1							SAA4	STK31							IGKV1-33	PITHD1							UNC5B	CLIC4							ZADH2	STK31							RMDN3	PITHD1
						CFHR1	AJAP1							ZADH2	TMEM132C							MFRP	PLXDC1							XPNPEP1	B4GAT1							ABCB9	TMEM132C							C8A	PLXDC1
						GANAB	TIMP2							ABCB9	TNFRSF1A							RMDN3	RTN1							C1QC	AJAP1							F11	TNFRSF1A							SEMA6B	RTN1
						UNC5B	SUMO4							F11	TYRO3							C8A	SHISA5							CPXM1	TIMP2							ADAMTS3	TYRO3							ACAN	SHISA5
						XPNPEP1	SUMO3							ADAMTS3	WDR11							SEMA6B	ACYP2							DMKN	SUMO4							CPXM1	WDR11							ANG	ACYP2
						C1QC	SUMO2							CPXM1	XXYLT1							ACAN	CACNA2D2							DSC3	SUMO3							CSRP1	XXYLT1							COL21A1	CACNA2D2
						CPXM1	STK31							CSRP1	ACHE							ANG	CLASRP							FAM19A2	SUMO2							CST6	ACHE							LPA	CLASRP
						DMKN	RCN2							CST6	ADGRL1							COL21A1	CLSTN2							SPRN	STK31							EIF4G3	ADGRL1							METRN	CLSTN2
						DSC3	MGAT3							EIF4G3	ADGRL3							LPA	CNTN3							ANXA1	RCN2							JUP	ADGRL3							MGP	CNTN3
						FAM19A2	GALNT17							JUP	ATP1B2							METRN	CRELD1							CCDC40	MGAT3							ACP2	ATP1B2							CHMP4A	CRELD1
						SPRN	CUTA							ACP2	C16orf89							MGP	DHRS9							LBP	GALNT17							IGFBPL1	C16orf89							CPXM2	DHRS9
						ANXA1	TWSG1							IGFBPL1	CD44							CHMP4A	DLD							LYVE1	CUTA							KRT24	CD44							TNXA	DLD
						CCDC40	TALDO1							KRT24	CLSTN3							CPXM2	EFNA1							MSTN	TWSG1							TNXA	CLSTN3							ADAMTS2	EFNA1
						LBP	STYK1							TNXA	CRELD1							TNXA	FXYD6							PRSS23	TALDO1							ERLEC1	CRELD1							APOF	FXYD6
						LYVE1	ST13P5							ERLEC1	DGCR2							ADAMTS2	HS6ST2							PTPRN	STYK1							GNAS	DGCR2							F11	HS6ST2
						MSTN	SORT1							GNAS	DNAJC3							APOF	HTRA1							C2	ST13P5							IGFALS	DNAJC3							S1PR1	HTRA1
						PRSS23	SLPI							IGFALS	DNER							F11	LILRB4							STC2	SORT1							IGLV3-16	DNER							COL4A1	LILRB4
						PTPRN	SERPINB6							IGLV3-16	EFNB2							S1PR1	LRP1B							TLL1	SLPI							ITM2C	EFNB2							ENG	LRP1B
						C2	SEMA4B							ITM2C	ENDOD1							COL4A1	MANEAL							TOLLIP	SERPINB6							KRT6B	ENDOD1							ERBB3	MANEAL
						STC2	RGMB							KRT6B	FTH1							ENG	MT1B							TXNDC5	SEMA4B							S1PR1	FTH1							IGLV1-51	MT1B
						TLL1	PGLS							S1PR1	HLA-A.Q09160							ERBB3	MT1F							CARTPT	RGMB							GALNT1	HLA-A.Q09160							KRT28	MT1F
						TOLLIP	NCAM2							GALNT1	HLA-C.Q29963							IGLV1-51	MT1L							CBLN4	PGLS							H2AFJ	HLA-C.Q29963							ATP1B1	MT1L
						TXNDC5	IDS							H2AFJ	IGFBP5							KRT28	NEFL							IGHV3-43	NCAM2							H2AFX	IGFBP5							CLIC4	NEFL
						CARTPT	GRIA4							H2AFX	LPL							ATP1B1	NLGN1							IGKV3D-20	IDS							HIST1H2AA	LPL							GNAS	NLGN1
						CBLN4	CD109							HIST1H2AA	MAN2A2							CLIC4	NPDC1							SEMA3F	GRIA4							HIST2H2AB	MAN2A2							IGKV1-5	NPDC1
						IGHV3-43	ADGRB3							HIST2H2AB	MANEAL							GNAS	PI16							SLITRK5	CD109							HIST2H2AC	MANEAL							NAF1	PI16
						IGKV3D-20	SLIT1							HIST2H2AC	MIA3							IGKV1-5	PODXL2							CDH6	ADGRB3							PLXNA1	MIA3							NQO2	PODXL2
						SEMA3F	SLC5A5							PLXNA1	MMP11							NAF1	S100B							CSMD2	SLIT1							ELFN2	MMP11							ADIRF	S100B
						SLITRK5	IGSF8							ELFN2	MMP2							NQO2	SEMA4C							IGKV2-40	SLC5A5							MATN2	MMP2							CHST3	SEMA4C
						CDH6	FSTL4							MATN2	NDRG2							ADIRF	SHISA4							MSLN	IGSF8							S100A7	NDRG2							LILRA2	SHISA4
						CSMD2	BGLAP							S100A7	NLGN1							CHST3	SLC6A11							XAB2	FSTL4							SMPD1	NLGN1							PRG2	SLC6A11
						IGKV2-40	ADAMTS4							SMPD1	NPTN							LILRA2	TMEM132B							YWHAQ	BGLAP							GRB2	NPTN							TPT1P8	TMEM132B
						MSLN	ADAM22							GRB2	NRN1							PRG2	TPBG							DLST	ADAMTS4							H2AFV	NRN1							CD81	TPBG
						XAB2	STMN4							H2AFV	OAF							TPT1P8	ARHGEF18							FBN1	ADAM22							H2AFZ	OAF							CEL	ARHGEF18
						YWHAQ	SERPINI1							H2AFZ	OLFML3							CD81	CADM3							PDGFRB	STMN4							HIST1H2AB	OLFML3							FTH1	CADM3
						DLST	SDF4							HIST1H2AB	PALM							CEL	CD320							PRG4	SERPINI1							HIST1H2AC	PALM							GDI2	CD320
						FBN1	HLA-DQA2							HIST1H2AC	PCDHAC2							FTH1	CNDP1							ASAH1	SDF4							HIST1H2AD	PCDHAC2							KRT27	CNDP1
						IGHG2	GPC5							HIST1H2AD	PHLDB3							GDI2	COL18A1							CDH11	HLA-DQA2							HIST1H2AG	PHLDB3							LGMN	COL18A1
						PDGFRB	GPC1							HIST1H2AG	PNOC							KRT27	GPC1							MFGE8	GPC5							HIST1H2AH	PNOC							CRHBP	GPC1
						PRG4	DRAXIN							HIST1H2AH	PTPRF							LGMN	GPR37							PROZ	GPC1							HIST1H2AJ	PTPRF							MDGA1	GPR37
						ASAH1	COL6A1							HIST1H2AJ	RMDN3							CRHBP	IGLON5							TRHDE	DRAXIN							HIST2H2AA3	RMDN3							MYOC	IGLON5
						CDH11	CNTNAP4							HIST2H2AA3	SCN4B							MDGA1	MAN2B2							CCER2	COL6A1							HIST3H2A	SCN4B							ST13	MAN2B2
						MFGE8	SEMA3B							HIST3H2A	SKP1							MYOC	PAPLN							CDH5	CNTNAP4							KRT10	SKP1							ST13P4	PAPLN
						PROZ	SELENOF							KRT10	SNCA							ST13	PGAM4							FRRS1L	SEMA3B							PRPH	SNCA							APMAP	PGAM4
						TRHDE	NDRG2							PRPH	ST6GAL2							ST13P4	PTPRN							IGLV2-18	SELENOF							ANPEP	ST6GAL2							EDIL3	PTPRN
						CCER2	MINPP1							ANPEP	SUSD5							APMAP	RTN4R							CNTNAP5	NDRG2							IGLV7-43	SUSD5							NME1	RTN4R
						CDH5	ISLR							IGLV7-43	SYT2							IGHG2	RTN4RL1							GFRA3	MINPP1							MST1	SYT2							ADAM15	RTN4RL1
						FRRS1L	DDAH2							MST1	WFIKKN2							EDIL3	SEZ6							NHLRC3	ISLR							PLGLB1	WFIKKN2							AP1B1	SEZ6
						IGLV2-18	SNED1							PLGLB1	ADAMTS4							NME1	TATDN1							TMED4	DDAH2							CDH1	ADAMTS4							ATP1A2	TATDN1
						CNTNAP5	PREP							CDH1	CACNA2D3							ADAM15	UCHL1							CPVL	SNED1							CPN1	CACNA2D3							DISP3	UCHL1
						GFRA3	PLA1A							CPN1	CARTPT							AP1B1	WBP2							DCBLD2	PREP							MDK	CARTPT							IGHV3-72	WBP2
						NHLRC3	PCDH10							MDK	CD14							ATP1A2	BMPR2							HSPB1	PLA1A							CDH12	CD14							SERPINB1	BMPR2
						TMED4	MT1E							CDH12	CELSR2							DISP3	CXCL14							MDK	PCDH10							DMKN	CELSR2							ADGRL2	CXCL14
						CPVL	MMP11							DMKN	CNTNAP4							IGHV3-72	GPR158							RNASE2	MT1E							MDGA1	CNTNAP4							APOM	GPR158
						DCBLD2	IGSF1							MDGA1	DNAH5							SERPINB1	ICOSLG							UIMC1	MMP11							ORM2	DNAH5							CD177	ICOSLG
						HSPB1	FSTL5							ORM2	ENPP5							ADGRL2	MGAT3							A4GALT	IGSF1							PLBD2	ENPP5							CXCL12	MGAT3
						MDK	FBLN5							PLBD2	FUT11							APOM	NXPH3							C1GALT1	FSTL5							CHI3L2	FUT11							ITIH3	NXPH3
						RNASE2	CADM3							CHI3L2	GAA							CD177	PDGFA							IGHV3-49	FBLN5							IGKV2-40	GAA							TNNC2	PDGFA
						UIMC1	AGA							IGKV2-40	GALNT2							CXCL12	PIANP							IGLV3-12	CADM3							MYOC	GALNT2							ADAMTS8	PIANP
						A4GALT	VAMP2							MYOC	GPR158							ITIH3	RNASE6							P0DOX7	AGA							IGHV2-70	GPR158							ALDH6A1	RNASE6
						C1GALT1	UNC5D							IGHV2-70	GPR37							TNNC2	RNF13							PROC	VAMP2							NOMO1	GPR37							ATF6B	RNF13
						IGHV3-49	TNXB							NOMO1	ICOSLG							ADAMTS8	SCN4B							STMN3	UNC5D							NOMO2	ICOSLG							C9	SCN4B
						IGLV3-12	SLC38A10							NOMO2	KIAA1549L							ALDH6A1	SEMA3A							TPP1	TNXB							NOMO3	KIAA1549L							ITGB1	SEMA3A
						P0DOX7	PTPRF							NOMO3	NRP1							ATF6B	SLC3A2							GNAS	SLC38A10							OSCAR	NRP1							MATN2	SLC3A2
						PROC	OSMR							OSCAR	NRXN2							C9	SULF2							MERTK	PTPRF							TNFSF8	NRXN2							NHLRC3	SULF2
						STMN3	NTRK2							TNFSF8	NXPH4							ITGB1	B4GALT1							PON1	OSMR							KLK10	NXPH4							ZNF648	B4GALT1
						TPP1	MT1L							KLK10	PCDHA12							MATN2	CD58							SERPINA4	NTRK2							KRT16	PCDHA12							C8B	CD58
						GNAS	MT1F							KRT16	PCDHA13							NHLRC3	DDR1							KRT14	MT1L							PTPRK	PCDHA13							GNB1	DDR1
						MERTK	MT1B							PTPRK	PCDHA3							ZNF648	EPHA10							LRRN1	MT1F							TUBA1A	PCDHA3							GNB2	EPHA10
						PON1	MLEC							TUBA1A	PCDHA4							C8B	FKBP1A							ENG	MT1B							TUBA1B	PCDHA4							GNB4	FKBP1A
						SERPINA4	HYOU1							TUBA1B	PCDHA5							GNB1	GALNT7							FUCA1	MLEC							TUBA1C	PCDHA5							KRT14	GALNT7
						KRT14	FITM1							TUBA1C	PCDHA6							GNB2	KITLG							FURIN	HYOU1							ABI3BP	PCDHA6							KRT71	KITLG
						LRRN1	EFNA1							ABI3BP	PCDHA7							GNB4	NDRG2							IGLV3-1	FMOD							C1GALT1	PCDHA7							KRT73	NDRG2
						ENG	CTSF							C1GALT1	PCDHA8							KRT14	NTRK3							LAMA1	FITM1							F9	PCDHA8							KRT74	NTRK3
						FUCA1	CCDC126							F9	PCDHA9							KRT71	PCSK2							NUCB2	EFNA1							KRT12	PCDHA9							LGI1	PCSK2
						FURIN	CALB1							KRT12	PCOLCE							KRT73	SGCE							SQSTM1	CTSF							LINGO3	PLXNB2							MDN1	SGCE
						IGLV3-1	B4GALT5							LINGO3	PLXNB2							KRT74	SNCG							C1QB	CCDC126							LTF	PPIC							SQSTM1	SNCG
						LAMA1	ATRN							LTF	PPIC							LGI1	SPOCK3							C1QL3	CALB1							C1RL	PPP1R1B							CTNNB1	SPOCK3
						NUCB2	SERPINA7							C1RL	PPP1R1B							MDN1	ST8SIA5							CPXM2	B4GALT5							EDN3	RCN2							IGFALS	ST8SIA5
						SQSTM1	PROS1							EDN3	RCN2							SQSTM1	STX12							GPNMB	ATRN							FAM171A1	SCUBE1							FAM49B	STX12
						C1QB	MST1							FAM171A1	SCUBE1							CTNNB1	TK2							IGLV7-46	SERPINA7							FZD2	SIRPB1.O00241							MMP14	TK2
						C1QL3	LMAN2							FZD2	SIRPB1.O00241							IGFALS	UBE2V1							BDNF	PROS1							FZD7	SIRPG							SCRG1	UBE2V1
						CPXM2	LAMA5							FZD7	SIRPG							FAM49B	UNC5C							DCC	MST1							IGLV4-69	TMEM132D							TXNDC17	UNC5C
						GPNMB	HLA-A.P30450							IGLV4-69	TMEM132D							MMP14	CARTPT							SELENOM	LMAN2							STC2	TPST1							VNN1	CARTPT
						IGLV7-46	HLA-A.P18462							STC2	TPST1							SCRG1	COL15A1							SELENON	LAMA5							XYLT1	USH2A							ADIPOQ	COL15A1
						BDNF	GALNT10							XYLT1	USH2A							TXNDC17	DCC							TATDN1	HLA-A.P30450							AKR1B15	ADAMTS2							C1QTNF1	DCC
						DCC	DDB1							AKR1B15	ADAMTS2							VNN1	GLDN							AMY1A	HLA-A.P18462							APOF	AXL							PROS1	GLDN
						SELENOM	COL6A3							APOF	AXL							ADIPOQ	HSPE1							AMY2A	GALNT10							C8A	CALB1							B4GALNT1	HSPE1
						SELENON	CHAD							C8A	CALB1							C1QTNF1	IGSF8							CCSMST1	DDB1							DNAAF1	CAMK2G							CAST	IGSF8
						TATDN1	TRIL							DNAAF1	CAMK2G							PROS1	MT3							CNTN6	COL6A3							IGHV1-69-2	CBLN4							INHBB	MT3
						AMY1A	PPIB							IGHV1-69-2	CBLN4							B4GALNT1	NPTX2							IL1RAPL1	CHAD							PROCR	CNR1							P0DOX3	NPTX2
						AMY2A	NFASC							PROCR	CNR1							CAST	PPP1R1B							LDLRAD3	TRIL							SERPINA3	CNTFR							COLEC11	PPP1R1B
						CCSMST1	NEO1							SERPINA3	CNTFR							INHBB	PTPRF							PPT1	PPIB							SLC24A4	CXADR							AMY2B	PTPRF
						CNTN6	NCSTN							SLC24A4	CXADR							P0DOX3	SLITRK5							UBE2L3	NFASC							VCL	CXorf36							C6	SLITRK5
						IL1RAPL1	KLK6							VCL	CXorf36							COLEC11	TMSB10							COL4A5	NEO1							KRT71	EFEMP1							PGD	TMSB10
						LDLRAD3	IFNAR2							KRT71	GLG1							AMY2B	CDH6							EIF4B	NCSTN							KRT73	GLG1							PMP2	CDH6
						PPT1	HAVCR2							KRT73	IGHV1-3							C6	CNTFR							GPX5	KLK6							KRT74	IGHV1-3							C4BPB	CNTFR
						UBE2L3	FLNC							KRT74	ISLR							PGD	CNTN4							GPX6	IFNAR2							MST1L	ISLR							INA	CNTN4
						COL4A5	EPHA10							MST1L	LRP11							PMP2	CTSH							IGF2R	HAVCR2							FABP5	LRP11							KRT6C	CTSH
						EIF4B	CTBS							FABP5	LRRTM2							C4BPB	FCGR3B							ITIH4	FLNC							HBG1	LRRTM2							TSKU	FCGR3B
						GPX5	SORL1							HBG1	LYNX1							INA	GGCT							MRC1	EPHA10							HBG2	LYNX1							IGHV1-69	GGCT
						GPX6	SLC6A1							HBG2	MYDGF							KRT6C	HLA-G							OXT	CTBS							PCSK9	MYDGF							KIAA0319L	HLA-G
						IGF2R	SIGLEC5							PCSK9	NLGN4X							TSKU	NRP1							P0DOX5	SORL1							CALU	NLGN4X							NID2	NRP1
						IGHG1	SELL							CALU	NLGN4Y							IGHV1-69	PCOLCE							TPT1P8	SLC6A1							GALNT5	NLGN4Y							POSTN	RNASE1
						MRC1	NRXN2							GALNT5	PCDHGC3							KIAA0319L	RNASE1							ZADH2	SIGLEC5							GNB3	PCDHGC3							C4BPA	SPINT2
						OXT	MSN							GNB3	PDGFB							NID2	SPINT2							FAH	SELL							PDYN	PDGFB							CPVL	UBE2N
						P0DOX5	ISLR2							PDYN	PTPRD							POSTN	UBE2N							IGFALS	NRXN2							STMN3	PTPRD							EMILIN3	UNC5D
						TPT1P8	INHBB							STMN3	PTPRG							C4BPA	UNC5D							IGKV3D-15	MSN							CFHR1	PTPRG							HAPLN4	XXYLT1
						ZADH2	EFNB2							CFHR1	PTPRN							CPVL	XXYLT1							ITM2C	ISLR2							MATN3	PTPRN							IGFBPL1	ART3
						FAH	EFNA3							MATN3	PTPRR							EMILIN3	ART3							KRT17	INHBB							CTNNB1	PTPRR							NUDC	C11orf87
						IGFALS	CAMK2B							CTNNB1	PVR							HAPLN4	C11orf87							ENPP5	EFNB2							P0DOX3	PVR							STAB1	NEDD8
						IGKV3D-15	OMG							P0DOX3	RTN4RL1							IGFBPL1	NEDD8							HPR	EFNA3							CD58	RTN4RL1							FBN1	NID1
						ITM2C	IGF1							CD58	SEMA6A							NUDC	NID1							JUP	CAMK2B							ICAM2	SEMA6A							HYI	NRXN2.P58401
						KRT17	CNTN4							ICAM2	SIRPA							STAB1	NRXN2.P58401							RTBDN	OMG							PSAT1	SIRPA							JAG2	NSG1
						ENPP5	CD55							PSAT1	ST13P5							FBN1	NSG1							SEMA6A	IGF1							CSPG4	ST13P5							POTEJ	THBS4
						HPR	C1QTNF4							AKR1B1	STX12							HYI	THBS4							SPINT1	CNTN4							FCGR3B	STX12							PRG4	YWHAZ
						JUP	BSG							CSPG4	SUMO2							JAG2	YWHAZ							GOLIM4	CD55							HLA-DRA	SUMO2							RAB12	CBLN1
						RTBDN	ANGPTL2							FCGR3B	SUMO3							POTEJ	CBLN1							IGHV4-28	C1QTNF4							PRPS1	SUMO3							RAB14	CTBS
						SEMA6A	SUSD5							HLA-DRA	SUMO4							PRG4	CTBS							INPP5D	BSG							PRPS2	SUMO4							RAB30	DGCR2
						SPINT1	SORCS1							PRPS1	TGOLN2							RAB12	DGCR2							RECK	ANGPTL2							VWF	TGOLN2							RAB33B	ERBB4
						GOLIM4	SHISA7							PRPS2	UBE2N							RAB14	ERBB4							SCUBE1	SUSD5							CPVL	UBE2N							RAB37	ISLR
						IGHV4-28	SEZ6							VWF	VCAM1							RAB30	ISLR							C1QA	SORCS1							HAPLN2	VCAM1							RAB39A	MAN2A1
						INPP5D	PVR							CPVL	VWA1							RAB33B	MAN2A1							KIT	SHISA7							KRT14	VWA1							RAB39B	MMP11
						RECK	PBXIP1							HAPLN2	AGA							RAB37	MMP11							LRP1B	SEZ6							SPTA1	AGA							RAB3A	NENF
						SCUBE1	MEGF8							KRT14	ATOX1							RAB39A	NENF							ADGRB2	PVR							ASAH1	ATOX1							RAB3B	PCSK1
						C1QA	KRT18							SPTA1	B3GAT3							RAB39B	PCSK1							C1QTNF3	PBXIP1							CFHR3	B3GAT3							RAB3C	PTPRD
						KIT	ICAM5							ASAH1	C12orf49							RAB3A	PTPRD							IGHV3-64	MEGF8							KRT18	C12orf49							RAB3D	RBP3
						LRP1B	HLA-A.P30512							CFHR3	C1QTNF4							RAB3B	RBP3							MANF	KRT18							METRN	C1QTNF4							RAB43	RIDA
						ADGRB2	HLA-A.P30456							KRT18	C1QTNF5							RAB3C	RIDA							PCSK2	ICAM5							SIL1	C1QTNF5							RAB6A	SH3BGRL3
						C1QTNF3	HLA-A.P10314							METRN	DPP7							RAB3D	SH3BGRL3							SPON2	HLA-A.P30512							ZNF648	DPP7							RAB6B	TXN
						IGHV3-64	CXorf36							SIL1	GALNT6							RAB43	TXN							SUN3	HLA-A.P30456							ATP1A2	GALNT6							SCUBE2	WFDC2
						MANF	USH2A							ZNF648	GBA							RAB6A	WFDC2							EIF4G3	HLA-A.P10314							IDH1	GBA							SELENOF	ASPH
						PCSK2	SHISA5							ATP1A2	GOLM1							RAB6B	ASPH							PCSK9	CXorf36							NECTIN2	GOLM1							SHH	CD200
						SPON2	POMGNT1							IDH1	GRIA2							SCUBE2	CD200							TMEM245	USH2A							UNC5B	GRIA2							PFN2	CDH4
						SUN3	NAGLU							NECTIN2	IGSF21							SELENOF	CDH4							ABCB9	SHISA5							FAM198A	IGSF21							PRKAR1B	CDH8
						EIF4G3	MANSC1							UNC5B	MAN2A1							SHH	CDH8							CCL14	POMGNT1							SLC6A11	MAN2A1							SERPINA3	CLN5
						PCSK9	F11							FAM198A	MT1B							PFN2	CLN5							F9	NAGLU							TFRC	MT1B							B3GNT9	ENPP6
						TMEM245	CXCL14							SLC6A11	MT1F							PRKAR1B	ENPP6							IGHV2-26	MANSC1							UIMC1	MT1F							PROC	LAMC1
						ABCB9	CDH18							TFRC	MT1L							SERPINA3	LAMC1							CSPG5	F11							CHST7	MT1L							PSAT1	MFAP4
						CCL14	CA4							UIMC1	NELL1							B3GNT9	MFAP4							DDTL	CXCL14							COL4A5	NELL1							CTSC	MFGE8
						F9	SEMA4C							CHST7	PRDX4							PROC	MFGE8							EXT2	CDH18							FBN2	PRDX4							IGHV2-26	MT1E
						IGHV2-26	RAD23B							COL4A5	QPCT							PSAT1	MT1E							GALNT1	CA4							S100A7A	QPCT							MAPK1	NOV
						CSPG5	PPP5C							FBN2	SDF4							CTSC	NOV							OLFML2A	SEMA4C							STAB1	SDF4							RNH1	OSMR
						DDTL	NXPH1							S100A7A	SLC3A2							IGHV2-26	OSMR							FABP4	RAD23B							ADIPOQ	SLC3A2							SLC24A4	PCDH1
						EXT2	LTBP2							STAB1	SLITRK3							MAPK1	PCDH1							FOLR1	PPP5C							CTHRC1	SLITRK3							COL6A2	PDGFB
						GALNT1	KRT24							ADIPOQ	TATDN1							RNH1	PDGFB							RTN4RL2	NXPH1							TUBA3C	TATDN1							FGFR4	PLA2G15
						OLFML2A	KRT12							CTHRC1	TGFBI							SLC24A4	PLA2G15							SLC39A12	LTBP2							TUBA3E	TGFBI							GSE1	PPIC
						FABP4	GGT7							TUBA3C	AP2A2							COL6A2	PPIC							SYT4	KRT24							BGN	AP2A2							IGLV7-46	SYT4
						FOLR1	GGH							TUBA3E	CHAD							FGFR4	SYT4							ULBP2	KRT12							EEF1A1	CHAD							NDST1	TGFBI
						RTN4RL2	ERBB4							BGN	COL4A2							GSE1	TGFBI							DSP	GGT7							EEF1A1P5	COL4A2							SCGB1A1	ADAM11
						SLC39A12	CHID1							EEF1A1	FAM198B							IGLV7-46	ADAM11							HABP2	GGH							PROZ	FAM198B							TMEM59L	ATP1A3
						SYT4	CADM2							EEF1A1P5	FGFR2							NDST1	ATP1A3							ABHD14A	ERBB4							VLDLR	FGFR2							XYLT1	CASC4
						ULBP2	B3GNT2							PROZ	FGL2							SCGB1A1	CASC4							ACAN	CHID1							CPAMD8	FGL2							AMPH	CHAD
						DSP	SLC39A10							VLDLR	GDF11							TMEM59L	CHAD							ACVR1B	CADM2							EPHB2	GDF11							BGN	CTSO
						HABP2	NCMAP							CPAMD8	HLA-C.Q9TNN7							XYLT1	CTSO							ITIH1	B3GNT2							ERBB3	HLA-C.Q9TNN7							COL4A5	FGFR3
						ABHD14A	GALNT6							EPHB2	ISLR2							AMPH	FGFR3							PDGFB	SLC39A10							FAM20B	ISLR2							KLK7	GALNT17
						ACAN	CBLN1							ERBB3	LINGO1							BGN	GALNT17							ST6GALNAC1	NCMAP							CD9	LINGO1							MXRA8	GAPDHS
						ACVR1B	C16orf89							FAM20B	MAN1C1							COL4A5	GAPDHS							CDH1	GALNT6							IGFBP7	MAN1C1							BMP6	GLA
						PDGFB	AXL							CD9	MEGF9							KLK7	GLA							COL2A1	CBLN1							IGSF1	MEGF9							CD99	IFI30
						ST6GALNAC1	ADGRL1							IGFBP7	MT1E							MXRA8	IFI30							DLK2	C16orf89							KRT25	MT1E							CXCL16	LFNG
						CDH1	ACHE							IGSF1	NTRK2							BMP6	LFNG							EFNB3	AXL							CD302	NTRK2							PRRG1	PROCR
						COL2A1	ZP2							KRT25	OLFM1							CD99	PROCR							FAM174A	ADGRL1							HSP90AA1	OLFM1							DSC2	PVR
						DLK2	TXNDC17							CD302	PODXL2							CXCL16	PVR							MESD	ACHE							PRKAR1B	PODXL2							HP	SEMA3B
						EFNB3	SEMA4D							HSP90AA1	PRCP							PRRG1	RELN							ATP1A3	ZP2							TPM4	PRCP							PCP4L1	SERPINE2
						FAM174A	SEMA3A							PRKAR1B	QDPR							DSC2	SEMA3B							CETP	TXNDC17							TSKU	QDPR							ST13P5	SLITRK4
						MESD	LRRTM4							TPM4	SCRG1							EGFR	SERPINE2							IGHV5-51	SEMA4D							DMXL2	SCRG1							BST1	ANGPTL2
						ATP1A3	LRP11							TSKU	VASN							PCP4L1	SLITRK4							IGLC1	SEMA3A							GNRH1	VASN							C1RL	ATRNL1
						CETP	ERAP2							DMXL2	CALB2							ST13P5	ANGPTL2							IGLV4-69	LRRTM4							HLA-DQA2	CALB2							CRISP3	C1QL3
						IGHV5-51	CRYM							GNRH1	CCK							BST1	ATRNL1							PDIA4	LRP11							LAMA4	CCK							EXOC3L4	ENPP4
						IGLC1	CRIP1							HLA-DQA2	CSF2RA							C1RL	C1QL3							TIE1	ERAP2							LIPA	CSF2RA							GNRH1	GGH
						IGLV4-69	CHRDL1							LAMA4	CXCL14							CRISP3	ENPP4							C4BPA	CRYM							PHF21B	CXCL14							IGHV3-64	GLRX
						PDIA4	CANT1							LIPA	ELN							EXOC3L4	GGH							CD248	CRIP1							RNH1	ELN							LCN2	IGFBP5
						TIE1	CADM1							PHF21B	ENPP6							GNRH1	GLRX							CLUL1	CHRDL1							DCD	ENPP6							SLC34A3	LRRTM2
						C4BPA	ATP1B1							RNH1	GALNT16							IGHV3-64	IGFBP5							ENTPD6	CANT1							FOLR1	GALNT16							UBQLN4	NECTIN1
						CD248	AP2A2							DCD	HLA-C.P30505							LCN2	LRRTM2							HAPLN4	CADM1							SHH	HLA-C.P30505							APOC3	PCDH12
						CLUL1	VWA7							FOLR1	IL18BP							SLC34A3	NECTIN1							IGHV3-23	ATP1B1							SMPDL3B	IL18BP							IGHG4	VAMP1
						ENTPD6	TGOLN2							SHH	IL1RAPL1							UBQLN4	PCDH12							IGHV5-10-1	AP2A2							TLL1	IL1RAPL1							IGLV2-14	VAMP3
						HAPLN4	SIGLEC14							SMPDL3B	MGAT2							APOC3	VAMP1							ITGB1	VWA7							IGHV2-26	MGAT2							OXT	CACHD1
						IGHV3-23	SEZ6L							TLL1	PTN							IGHG4	VAMP3							ITGBL1	TGOLN2							LTBP3	PTN							TIMP1	CANX
						IGHV5-10-1	PTPRG							IGHV2-26	RTN4RL2							IGLV2-14	CACHD1							MDGA2	SIGLEC14							NOTCH3	RTN4RL2							C1GALT1	GRIA2
						ITGB1	PPP1R1B							LTBP3	SHISA7							OXT	CANX							NAGA	SEZ6L							OPTN	SHISA7							FUT11	NTRK2
						ITGBL1	PODXL2							NOTCH3	SLITRK4							TIMP1	GRIA2							ORM2	PTPRG							KRT17	SLITRK4							NCMAP	PLXNB1
						MDGA2	PLBD2							OPTN	TMEM132B							C1GALT1	NTRK2							PCDHGA11	PPP1R1B							LTBP4	TMEM132B							POMC	ST6GALNAC1
						NAGA	NENF							KRT17	TMPRSS5							FUT11	PLXNB1							PCDHGA12	PODXL2							RECK	TMPRSS5							SEMA6C	TMEM132E
						ORM2	KITLG							LTBP4	YIPF3							NCMAP	ST6GALNAC1							PCDHGA7	PLBD2							TPM1	YIPF3							SSC5D	ALDOB
						PCDHGA11	HBEGF							RECK	AKR1A1							POMC	TMEM132E							PLA2G15	NENF							BAMBI	AKR1A1							STC2	CALM1
						PCDHGA12	EGLN2							TPM1	AP1B1							SEMA6C	ALDOB							PNOC	KITLG							IGLC7	AP1B1							TFRC	CCDC126
						PCDHGA7	ASPH							BAMBI	CA11							SSC5D	CALM1							PTPRT	HBEGF							KRT9	CA11							VMO1	EPHA7
						PLA2G15	AKR1A1							IGLC7	CD55							STC2	CCDC126							WSCD1	EGLN2							ING2	CD55							TAGLN	FAM19A1
						PNOC	SHBG							KRT9	CSPG5							TFRC	EPHA7							ACE	ASPH							RTBDN	CSPG5							FCGRT	FGFR1
						PTPRT	NETO1							ING2	EFCAB14							VMO1	FAM19A1							BCKDK	AKR1A1							SORL1	EFCAB14							HLA-DPB1	GOLM1
						WSCD1	NEGR1							RTBDN	EPHA7							TAGLN	FGFR1							CREG1	SHBG							TWF2	EPHA7							HLA-DRB1	JAM2
						ACE	JAM2							SORL1	FAM171B							FCGRT	GOLM1							LRRTM2	NETO1							GRP	FAM171B							HLA-DRB1.P01912	PLXNB2
						BCKDK	FXYD6							TWF2	FAM20A							HLA-DPB1	JAM2							IGHV4-4	NEGR1							IGHV4-4	FAM20A							HLA-DRB1.P20039	PRCP
						CREG1	CRTAC1							GRP	FBLN5							HLA-DRB1	PLXNB2							PGD	JAM2							PGD	FBLN5							HLA-DRB1.Q5Y7A7	S100A1
						LRRTM2	CD320							IGHV4-4	GALNT10							HLA-DRB1.P01912	PRCP							CA10	FXYD6							CA10	GALNT10							HLA-DRB1.Q95IE3	SCUBE1
							CA11							PGD	GNPTG							HLA-DRB1.P20039	S100A1							HSPB1	CD320							HSPB1	GNPTG							VWF	SPOCK1
							UGT8							CA10	JAG2							HLA-DRB1.Q5Y7A7	SCUBE1							FCGRT	CA11							FCGRT	JAG2							CDH1	ADAMTS4
							TNR							HSPB1	LAMC1							HLA-DRB1.Q95IE3	ADAMTS4							GFRA3	UGT8							GFRA3	LAMC1							CHIT1	ECM2
							SLC3A2							FCGRT	LILRB4							VWF	ECM2							HIST1H4A	TNR							HIST1H4A	LILRB4							IGHV1-58	EZR
							PLOD3							GFRA3	PCSK6							CDH1	EZR							IGKV6D-21	SLC3A2							IGKV6D-21	PCSK6							IGHV6-1	HEPACAM
							PGM1							HIST1H4A	RNASET2							CHIT1	HEPACAM							MSN	PLOD3							MSN	RNASET2							IGKV1-17	LCAT
							NCAN							IGKV6D-21	RTN4R							IGHV1-58	LCAT							RBP3	PGM1							RBP3	RTN4R							PIGR	PLXNA4
							MT2A							MSN	SEMA6C							IGHV6-1	PLXNA4							ESD	NCAN							ESD	SEMA6C							SEMA4D	PPIB
							MT1X							RBP3	UBE2L3							IGKV1-17	PPIB							IGLV10-54	MT2A							IGLV10-54	UBE2L3							SPON2	PTPRM
							MT1H							ESD	ATP1A3							PIGR	PTPRM							NAF1	MT1X							NAF1	ATP1A3							TMPRSS13	RNASET2
							MT1G							IGLV10-54	CHST12							SEMA4D	RNASET2							NDST1	MT1H							NDST1	CHST12							ARPC3	ROBO2
							MT1A							NAF1	CTSO							SPON2	ROBO2							PTPRM	MT1G							PTPRM	CTSO							IGHD	SRPX
							MGP							NDST1	FGFR4							TMPRSS13	SRPX							ST3GAL6	MT1A							ST3GAL6	FGFR4							NRP2	VSTM2B
							DNER							PTPRM	JAM3							ARPC3	VSTM2B							CAPG	MGP							CAPG	JAM3							PODN	CBLN3
							TSKU							ST3GAL6	KLK7							IGHD	CBLN3							IGLV2-14	DNER							IGLV2-14	KLK7							PRSS23	CNTN6
							PTPRS							CAPG	MAN1B1							NRP2	CNTN6							NRG3	TSKU							NRG3	MAN1B1							PTPRT	CSMD2
							PCDH1							IGLV2-14	MMP7							PODN	CSMD2							SELENOM	PTPRS							SELENOM	MMP7							SELPLG	CTGF
							NECTIN2							NRG3	NTNG1							PRSS23	CTGF							SLC5A5	PCDH1							SLC5A5	NTNG1							CLUH	DPT
							MEGF9							SELENOM	PCDH17							PTPRT	DPT							SPRN	NECTIN2							SPRN	PCDH17							DMXL2	EFNB1
							MAN2A2							SLC5A5	PGRMC1							SELPLG	EFNB1							A4GALT	MEGF9							A4GALT	PGRMC1							LOX	FAM171A1
							HFE2							SPRN	SPINT2							CLUH	FAM171A1							ACTN1	MAN2A2							ACTN1	SPINT2							PLOD1	GPX5
							ENPP6							A4GALT	CNTNAP5							DMXL2	GPX5							CBR1	HFE2							CBR1	CNTNAP5							PLS1	GPX6
							CPD							ACTN1	COL6A3							LOX	GPX6							CD248	ENPP6							CD248	COL6A3							PRPS1	MCAM
							C8A							CBR1	DISP3							PLOD1	HSPG2							FUCA2	CPD							FUCA2	DISP3							PRPS2	MMP2
							ADAMTS2							CD248	FAM174A							PLS1	MCAM							KRT1	C8A							KRT1	FAM174A							SELL	SDF4
							NRG3							FUCA2	FAM69C							PRPS1	MMP2							NCMAP	ADAMTS2							NCMAP	FAM69C							UBQLN2	SHISA7
							NEDD8							KRT1	GABARAPL2							PRPS2	SDF4							SLC6A1	NRG3							SLC6A1	GABARAPL2							BAMBI	TPST1
							ING2							NCMAP	IGLON5							SELL	SHISA7							VMO1	NEDD8							VMO1	IGLON5							KRT10	ADAMTS1
							IGHV4-61							SLC6A1	NID1							UBQLN2	TPST1							WDR1	ING2							WDR1	NID1							CALCA	C1QTNF5
							IGHV4-59							VMO1	PLXDC1							BAMBI	ADAMTS1							ADIRF	IGHV4-61							ADIRF	PLXDC1							CALCA.P06881	CA10
							IGHV4-39							WDR1	QSOX2							KRT10	C1QTNF5							FUCA1	IGHV4-59							FUCA1	QSOX2							GREM1	CCER2
							IGHV4-38-2							ADIRF	SSC5D							CALCA	CA10							HLA-A.P05534	IGHV4-39							HLA-A.P05534	SSC5D							PAMR1	FAM69C
							IGHV4-34							FUCA1	ARSA							CALCA.P06881	CCER2							HLA-A.P30447	IGHV4-38-2							HLA-A.P30447	ARSA							SEMA3F	HFE2
							IGHV4-30-4							HLA-A.P05534	CACNA2D2							GREM1	FAM69C							IGHV2-70D	IGHV4-34							IGHV2-70D	CACNA2D2							SPTA1	IGKV2-40
							ICAM2							HLA-A.P30447	CLSTN2							PAMR1	HFE2							NPY	IGHV4-30-4							NPY	CLSTN2							SST	KCTD12
							HYAL1							IGHV2-70D	FABP7							SEMA3F	IGKV2-40							TUBB2A	ICAM2							TUBB2A	FABP7							JCHAIN	MPZ
							HLA-A.P30457							NPY	GPC1							SPTA1	KCTD12							TUBB2B	HYAL1							TUBB2B	GPC1							PDIA4	SIAE
							HLA-A.P30453							TUBB2A	IGLV1-36							SST	MPZ								HLA-A.P30457								IGLV1-36							TAC1	TMEM25
							HLA-A.P16190							TUBB2B	MERTK							PDIA4	SIAE								HLA-A.P30453								MERTK							FAM198A	B3GALNT1
							HLA-A.P01891								NPM1							TAC1	TMEM25								HLA-A.P16190								NPM1							GPNMB	CDH10
							FRMPD1								OR2AG1							FAM198A	B3GALNT1								HLA-A.P01891								OR2AG1							LAMA1	FRZB
							CORO1A								OR2AG2							GPNMB	CDH10								FRMPD1								OR2AG2							LRP8	GAS6
							CELSR2								RNF13							LAMA1	FRZB								CORO1A								RNF13							UBE2L3	NSF
							CACNA2D2								SEZ6							LRP8	GAS6								CELSR2								SEZ6							AKR1A1	ST6GAL2
							BCAM								SLITRK5							UBE2L3	NSF								CACNA2D2								SLITRK5							CHST7	TALDO1
							UBE2V2								TK2							AKR1A1	ST6GAL2								BCAM								TK2							INPP5D	CD14
							TMEM25								ANTXR1							CHST7	TALDO1								UBE2V2								ANTXR1							MRC1	CEND1
							MMRN2								CD59							INPP5D	CD14								TMEM25								CD59							PDYN	EFEMP2
							LTBP1								CNDP1							MRC1	CEND1								MMRN2								CNDP1							PLXNA1	MMRN2
							IDH1								CPB1							PDYN	EFEMP2								LTBP1								CPB1							RTBDN	SORL1
							HSPG2								DHRS9							PLXNA1	MMRN2								IDH1								DHRS9							S100A7	ERP44
							HLA-DRA								LAMA2							RTBDN	SORL1								HLA-DRA								LAMA2							EMILIN2	STMN4
							FAM49B								MAN1A1							S100A7	ERP44								FAM49B								MAN1A1							GALNT15	TNFSF13B
							CALB2								MFAP4							EMILIN2	STMN4								CALB2								MFAP4							NAGPA	TXNDC5
							ADCYAP1								NLGN2							GALNT15	TNFSF13B								ADCYAP1								NLGN2							SIRPA	ACHE
							ADAM10								NOTCH2							NAGPA	TXNDC5								ADAM10								NOTCH2							EFNB3	DLK2
							TNFRSF21								PCSK2							SIRPA	ACHE								TNFRSF21								PCSK2							HIST1H1E	FAT2
							TMEFF1								SEMA3B							EFNB3	DLK2								TMEFF1								SEMA3B							MESD	GSTO1
							NRXN3								STX1B							HIST1H1E	FAT2								NRXN3								STX1B							BACE1	SLC38A10
							FSTL1								CDH22							MESD	GSTO1								FSTL1								CDH22							CPM	SPINK2
							FGL2								DBH							BACE1	SLC38A10								FGL2								DBH							FAM241B	TWSG1
							FAM69C								JAM2							CPM	SPINK2								FAM69C								JAM2							GBA	USH2A
							CSPG4								LAMP5							FAM241B	TWSG1								CSPG4								LAMP5							LRRN1	ALDH2
							CLSTN3								MCAM							GBA	USH2A								CLSTN3								MCAM							PLOD3	GFRA3
							ADAMTS1								NEU1							LRRN1	ALDH2								ADAMTS1								NEU1							MET	ITIH5
							RTN4RL1								SPINK6							PLOD3	GFRA3								RTN4RL1								SPINK6							CRIP1	LTBP4
							NRP1								TWSG1							MET	ITIH5								NRP1								TWSG1							IGKV3D-15	MRC2
							MMP7								CD320							CRIP1	LTBP4								MMP7								CD320							KRT81	OR2AG1
							LAMB2								CNPY2							IGKV3D-15	MRC2								LAMB2								CNPY2							APOB	OR2AG2
							GSTO1								DNAJB11							KRT81	OR2AG1								GSTO1								DNAJB11							COL2A1	SHISA6
							FTH1								FAT2							APOB	OR2AG2								FTH1								FAT2							IGLV6-57	VCAM1
							DPP10								GALNS							COL2A1	SHISA6								DPP10								GALNS							KRT6B	VNN3
							UNC5C								GPC4							IGLV6-57	VCAM1								UNC5C								GPC4							LBP	ADAMTSL2
							SLC34A3								MENT							KRT6B	VNN3								SPARC								MENT							MIA	FAM19A4
							SEC62								NUDC							LBP	ADAMTSL2								SLC34A3								NUDC							NAGLU	HLA-C.P04222
							MYDGF								PTPRT							MIA	FAM19A4								SEC62								PTPRT							PRSS1	PLBD2
							KIAA1549L								RCN1							NAGLU	HLA-C.P04222								MYDGF								RCN1							TFPI	SPANXA2-OT1
							GRP								ST13							PRSS1	PLBD2								KIAA1549L								ST13							TNFRSF12A	TGFBR3
							ERP44								ST13P4							TFPI	SPANXA2-OT1								GRP								ST13P4							CDKL1	TREM2
							CHST10								ACYP2							TNFRSF12A	TGFBR3								ERP44								ACYP2							PKDCC	VWA7
							CACNA2D3								AEBP1							CDKL1	TREM2								CHST10								AEBP1							VIP	ADAM9
							APOF								CADM4							PKDCC	VWA7								CACNA2D3								CAMK2B							WSCD2	AGA
							ADAM15								CAMK2B							VIP	ADAM9								APOF								CHST15								B4GALT5
							SKP1								CHST15							WSCD2	AGA								ADAM15								COA3								CHID1
							SFRP4								COA3								B4GALT5								SKP1								CYTL1								IGKV6D-21
							POSTN								CYTL1								CHID1								SFRP4								EFNB3								NPEPPSL1
							PLXNA4								EFNB3								IGKV6D-21								POSTN								GGH								PILRA
							PHLDB3								GGH								NPEPPSL1								PLXNA4								HLA-A.P18462								RCN1
							MPZ								HLA-A.P18462								PILRA								PHLDB3								HLA-A.P30450								ROBO1
							IFNAR1								HLA-A.P30450								RCN1								MPZ								KDM2A								STMN3
							IFI30								KDM2A								ROBO1								IFNAR1								LUZP2								VCAN
							ERAP1								LUZP2								STMN3								IFI30								MANBA								BDNF
							CLN5								MANBA								VCAN								ERAP1								PCSK1								CLUL1
							TYRO3								PCSK1								BDNF								CLN5								PGRMC2								GALNT10
							SERPINE2								PGRMC2								CADM4								TYRO3								SCN2B								JAG1
							NOV								RELN								CLUL1								SERPINE2								SEMA3G								NPEPPS
							MEGF10								SCN2B								GALNT10								NOV								ADAM11								PCDHAC2
							KRT26								SEMA3G								JAG1								MEGF10								CADM1								SEC62
							HLA-A.P30459								ADAM11								NPEPPS								KRT26								FMOD								SNCA
							HLA-A.P16189								CADM1								PCDHAC2								HLA-A.P30459								GALNT18								TNR
							GALNT15								GALNT18								SEC62								HLA-A.P16189								HAVCR2								ADM
							EXTL2								HAVCR2								SNCA								GALNT15								NOV								ASTN1
							CRISP3								NOV								TNR								EXTL2								UBE2NL								CDH9
							CNR1								UBE2NL								ADM								CRISP3								VIP								CHST12
							CDH13								VIP								ASTN1								CNR1								WFDC2								CHST15
							ADGRB1								WFDC2								CDH9								CDH13								ACYP1								LAMA5
							XYLT1								ACYP1								CHST12								ADGRB1								ALDH1A1								PGLS
							TNXA								ALDH1A1								CHST15								XYLT1								BCAM								SFRP4
							PTPRD								BCAM								LAMA5								TNXA								CPLX2								TBCA
							MCAM								CPLX2								PGLS								PTPRD								CTBS								CDH22
							ITIH5								CTBS								SFRP4								MCAM								FGFR1								GLG1
							GAS6								FGFR1								TBCA								ITIH5								HK1								HBA1
							DPP7								HK1								CDH22								GAS6								HLA-A.P10314								OSCAR
							CBLN3								HLA-A.P10314								GLG1								DPP7								HLA-A.P30456								PIP
							CACHD1								HLA-A.P30456								HBA1								CBLN3								HLA-A.P30512								VAMP2
							POTEJ								HLA-A.P30512								OSCAR								CACHD1								ITIH5								IGLV7-43
							NXPH4								ITIH5								PIP								POTEJ								LRRTM4								JAM3
							LYZ								LRRTM4								VAMP2								NXPH4								MMRN2								KDM2A
							FCGR2C								MMRN2								IGLV7-43								LYZ								PIGR								MANBA
							FCGR2A								PIGR								JAM3								FCGR2C								PRKCQ								MENT
							CNPY2								PRKCQ								KDM2A								FCGR2A								TGFBR3								NLGN2
							CLASRP								TGFBR3								MANBA								CNPY2								ATP1A1								PCDHGC5
							CDH23								ATP1A1								MENT								CLASRP								CLUH								PPIAL4A
							B3GALNT1								CLUH								NLGN2								CDH23								CTGF								RAD23B
							VCAN								CTGF								PCDHGC5								B3GALNT1								GLOD4								SELENOM
							UBQLN1								GLOD4								PPIAL4A								VCAN								HAPLN4								SEMA6A
							ST6GAL2								HAPLN4								RAD23B								UBQLN1								NCSTN								A8MTW9
							IGKV6D-21								NCSTN								SELENOM								ST6GAL2								NEFM								C1R
							IGHV3-15								NEFM								SEMA6A								IGKV6D-21								PIP								CDH7
							FSTL3								PIP								A8MTW9								IGHV3-15								PROS1								EFNA5
							COL14A1								PROS1								C1R								FSTL3								ANGPTL7								IGHV1-69-2
							C8B								ANGPTL7								CDH7								COL14A1								CD163								MAN1B1
							C6								CD163								EFNA5								C8B								CNTNAP3								VWA1
							ADAMTSL2								CNTNAP3								IGHV1-69-2								C6								CNTNAP3B								ABCA2
							VCL								CNTNAP3B								MAN1B1								ADAMTSL2								COL15A1								CENPF
							SYT7								COL15A1								VWA1								VCL								CXCL12								DNASE2
							SULF2								CXCL12								ABCA2								SYT7								DDR1								GALNT13
							SMPDL3B								DDR1								CENPF								SULF2								EFNA5								MAN1A2
							SCUBE2								EFNA5								DNASE2								SMPDL3B								ERP44								MAN1C1
							OPCML								ERP44								GALNT13								SCUBE2								FSCN1								SPARC
							NPDC1								FSCN1								MAN1A2								OPCML								PBXIP1								TTLL6
							MAPK1								PBXIP1								MAN1C1								NPDC1								PDGFD								UBE2V2
							KRT4								PDGFD								TTLL6								MAPK1								C1QTNF3								CDH20
							IGHG4								C1QTNF3								UBE2V2								KRT4								C4A								CPPED1
							HSPA2								C4A								CDH20								IGHG4								CACHD1								DRAXIN
							FAM171B								CACHD1								CPPED1								HSPA2								CHIT1								GDF11
							EPHA4								CHIT1								DRAXIN								FAM171B								CHRDL1								HBZ
							CYTL1								CHRDL1								GDF11								EPHA4								DCC								TWF2
							CDH3								DCC								HBZ								CYTL1								EXTL1								ADA2
							ADAM23								EXTL1								TWF2								CDH3								GALNT13								ADAMTS3
							ABCA2								GALNT13								ADA2								ADAM23								GALNT17								BGLAP
							OR2AG2								GALNT17								ADAMTS3								ABCA2								MT1M								C1QA
							OR2AG1								MT1M								BGLAP								OR2AG2								NENF								NPM1
							OAF								NENF								C1QA								OR2AG1								PPP5C								SF3A1
							KRT16								PPP5C								HBB								OAF								SERPINE2								ARSA
							GPR37								SERPINE2								NPM1								KRT16								SHISA6								C1QB
							AGRN								SHISA6								SF3A1								GPR37								SLITRK2								CHRDL1
							SEMA3C								SLITRK2								ARSA								AGRN								TNNC2								GNPTG
							MFAP4								TNNC2								C1QB								SEMA3C								ZG16B								GPC5
							KRT2								ZG16B								CHRDL1								MFAP4								CDH7								GPR37L1
							CD163								CDH7								GNPTG								KRT2								FAM19A1								MERTK
							SIAE								FAM19A1								GPC5								CD163								GGT7								OAF
							RELN								GGT7								GPR37L1								SIAE								HDHD2								PBXIP1
							KRT25								HDHD2								MERTK								KRT25								NECTIN1								SPRN
							IGSF21								NECTIN1								OAF								IGSF21								PLA2G15								VSIG4
							HS6ST3								PLA2G15								PBXIP1								HS6ST3								SLC38A10								GALC
							CLSTN2								SLC38A10								SPRN								CLSTN2								TMEM25								RELT
							ADAM11								TMEM25								VSIG4								ADAM11								ADA2								TIE1
							TREM2								ADA2								GALC								TREM2								AQP4								FAM174A
							MELTF								AQP4								RELT								MELTF								C1R								FAM19A2
							KRT1								C1R								TIE1								KRT1								C1S								GFAP
							FKBP2								C1S								FAM174A								FKBP2								MMP14								PLAUR
							C1R								MMP14								FAM19A2								C1R								ZP2								WFIKKN1
							XXYLT1								ZP2								GFAP								XXYLT1								CDH9								C12orf49
							NDST1								CDH9								PLAUR								NDST1								COL14A1								CCSMST1
							FAM20A								COL14A1								WFIKKN1								FAM20A								LAMA5								GANAB
							FABP5P3								LAMA5								C12orf49								FABP5P3								PGLS								KRT31
							EXOC3L4								PGLS								CCSMST1								EXOC3L4								ST8SIA5								NIF3L1
							CPAMD8								ST8SIA5								GANAB								CPAMD8								UBE2V2								NPHP1
							CDH10								UBE2V2								KRT31								CDH10								WFIKKN1								OLFML2A
							NLGN2								WFIKKN1								NIF3L1								NLGN2								C7								TMED7
							JAM3								C7								NPHP1								JAM3								CBLN2								CDH23
							ITGA7								CBLN2								OLFML2A								ITGA7								FABP5P3								COL11A1
							DNASE2								FABP5P3								TMED7								DNASE2								FOLR2								PALM2
							CTGF								FOLR2								CDH23								CTGF								GALC								CUTA
							CHST15								GALC								COL11A1								CHST15								LAMB2								FITM1
							CASC4								LAMB2								PALM2								CASC4								LIMA1								HSPA9
							SSC5D								LIMA1								CUTA								SSC5D								LRIG2								IGFBP6
							ROBO1								LRIG2								FITM1								ROBO1								LTBP1								LTA4H
							QPCT								LTBP1								HSPA9								QPCT								MASP1								PPIAL4C
							NELL1								MASP1								LTA4H								NELL1								NOP56								PPIAL4D
							LINGO1								NOP56								PPIAL4C								LINGO1								PALM2								PPIAL4E
							HEXA								PALM2								PPIAL4D								HEXA								PCDH12								PPIAL4G
							FAT2								PCDH12								PPIAL4E								FAT2								SNED1								CADM1
							CNTN3								SNED1								PPIAL4G								CNTN3								DSG2								HLA-C.P30499
							C4orf48								DSG2								CADM1								C4orf48								EFNA1								NPY
							VAT1L								EFNA1								HLA-C.P30499								VAT1L								HSPA2								SPINK6
							SEMA6B								HSPA2								NPY								SEMA6B								LDLR								TMSB4Y
							PDGFD								LDLR								SPINK6								PDGFD								P4HB								CLMP
							PCDH7								P4HB								TMSB4Y								PCDH7								PCDHGC5								FSCN1
							KRT10								PCDHGC5								CLMP								KRT10								PI16								HLA-A.P18462
							IGKV1-13								PI16								FSCN1								IGKV1-13								CEMIP								HLA-A.P30450
							GOLM1								CEMIP								HLA-A.P18462								GOLM1								HLA-A.P01891								HSPA2
							FBLN2								HLA-A.P01891								HLA-A.P30450								FBLN2								HLA-A.P16190								KRT18
							FAM198B								HLA-A.P16190								HSPA2								FAM198B								HLA-A.P30453								LAMB2
							PRRT3								HLA-A.P30453								KRT18								PRRT3								HLA-A.P30457								PDGFD
							NID2								HLA-A.P30457								LAMB2								NID2								LAMB1								RAB1A
							GNS								LAMB1								PDGFD								GNS								MFGE8								RAB1B
							GALNT18								MFGE8								RAB1A								GALNT18								SF3A1								RAB1C
							CRISPLD1								SF3A1								RAB1B								CRISPLD1								ATF6B								RECK
							C9								ATF6B								RAB1C								C9								FRRS1L								SIGLEC5
							TMCC1								FRRS1L								RECK								TMCC1								NPNT								ANTXR1
							SHISA6								NPNT								SIGLEC5								SHISA6								NPW								FAM20C
							PCDHAC2								NPW								ANTXR1								PCDHAC2								RNASE1								FRMPD1
							MMP2								RNASE1								FAM20C								MMP2								CBLN3								FRRS1L
							CDH20								CBLN3								FRMPD1								HP								CRABP1								TMEM178A
							ST8SIA5								CRABP1								FRRS1L								CDH20								FBLN2								CDH15
							ST13P4								FBLN2								TMEM178A								ST8SIA5								FSTL5								CXADR
							ST13								FSTL5								CDH15								ST13P4								HLA-A.P16189								HLA-C.P30501
							SORCS3								HLA-A.P16189								CXADR								ST13								HLA-A.P30459								NETO1
							PRCP								HLA-A.P30459								HLA-C.P30501								SORCS3								IL6R								NOTCH2
							NLGN3								IL6R								NETO1								PRCP								MXRA8								PLD5
							LAMC1								MXRA8								NOTCH2								NLGN3								SEMA4C								QSOX2
							LAMA4								SEMA4C								PLD5								LAMC1								TIMP2								CCDC40
							ITIH3								TIMP2								QSOX2								LAMA4								TMED7								HAVCR2
							IGFBP3								TMED7								CCDC40								ITIH3								CA4								HLA-C.Q29865
							HEG1								CA4								HAVCR2								IGFBP3								EFNB1								PLEKHB1
							EPHB6								EFNB1								HLA-C.Q29865								HEG1								ERAP1								SIRPB1
							CRB2								ERAP1								PLEKHB1								EPHB6								GSR								ATOX1
							CD200								GSR								SIRPB1								CRB2								ITM2B								HDHD2
							BMP6								ITM2B								ATOX1								CD200								LAMA1								HLA-C.Q07000
							RNF13								LAMA1								HDHD2								BMP6								MSLN								IFNAR1
							HS6ST1								MSLN								HLA-C.Q07000								RNF13								NETO1								KRT16
							GPR158								NETO1								IFNAR1								HS6ST1								TMCC1								KRT24
							TMEM59L								TMCC1								KRT16								GPR158								TTLL6								LAMB1
							LPL								TTLL6								KRT24								TMEM59L								CBLN1								LYVE1
							IGLON5								CBLN1								LAMB1								LPL								CCER2								PCYOX1
							BMPR2								CCER2								LYVE1								IGLON5								DLST								SH3BGRL
							ACTG2								DLST								PCYOX1								BMPR2								EIF4B								SYT7
							ACTC1								EIF4B								SH3BGRL								ACTG2								MAN1A2								VWC2
							ACTBL2								MAN1A2								SYT7								ACTC1								PILRA								C1S
							ACTA2								PILRA								VWC2								ACTBL2								VCAN								CALML5
							TMEM132E								VCAN								C1S								ACTA2								VSTM2B								CD163
							TMED7								VSTM2B								CALML5								TMEM132E								CAP1								HLA-A.P10314
							SCRG1								CAP1								CD163								TMED7								FAP								HLA-A.P30456
							PLS1								FAP								HLA-A.P10314								SCRG1								FSTL1								HLA-A.P30512
							PCDHGC3								FSTL1								HLA-A.P30456								PLS1								GREM1								SIGLEC14
							PALM2								GREM1								HLA-A.P30512								PCDHGC3								IGLV1-40								SMPDL3B
							LTF								IGLV1-40								SIGLEC14								PALM2								LDLRAD3								CHI3L2
							LFNG								LDLRAD3								SMPDL3B								LTF								RNASE2								CTSF
							KRT9								RNASE2								CHI3L2								LFNG								COL18A1								DNAJC3
							HYI								COL18A1								CTSF								KRT9								DNASE2								ERAP1
							HGFAC								DNASE2								DNAJC3								HYI								GLDN								FABP7
							FOLR2								GLDN								ERAP1								HGFAC								LRP1B								FCGR2A
							COL6A2								LRP1B								FABP7								FOLR2								NTRK3								GNS
							C1S								NTRK3								FCGR2A								COL6A2								SEMA4D								HLA-A.Q09160
							MANBA								SEMA4D								GNS								C1S								CDH11								NUCB2
							DHRS9								CDH11								HLA-A.Q09160								MANBA								CLN5								SLPI
							CADM4								CLN5								NUCB2								DHRS9								FAM19A2								ACP2
							APOB								FAM19A2								SLPI								APOB								LGALS3								C1QC
							ADA2								LGALS3								ACP2								ADA2								PPIB								COL16A1
							UBQLN4								PPIB								C1QC								UBQLN4								PREP								FCGR2C
							LSR								PREP								COL16A1								LSR								WFDC1								HS6ST1
							GZMH								WFDC1								FCGR2C								GZMH								C2orf40								LIPA
							GBA								C2orf40								HS6ST1								GBA								FOLR3								LTBP1
							DCD								FOLR3								LIPA								DCD								GORASP2								MGAT1
							CDKL1								GORASP2								LTBP1								CDKL1								MAN2B2								PEA15
							CCK								MAN2B2								MGAT1								CCK								ANGPTL2								PEPD
							TTN								ANGPTL2								PEA15								TTN								CNTN6								GINM1
							PRSS1								CNTN6								PEPD								PRSS1								DDB1								IFI6
							NPM1								DDB1								GINM1								NPM1								IGF2R								LYZ
							KRT27								IGF2R								IFI6								KRT27								ITGA7								PGRMC1
							FGFR1								ITGA7								LYZ								FGFR1								RAB13								SMPD1
							EPHA7								RAB13								PGRMC1								EPHA7								SCN1B								CNTNAP5
							CPN1								SCN1B								SMPD1								CPN1								SFRP4								COL6A3
							CBR1								SFRP4								CNTNAP5								CBR1								SIGLEC5								HLA-C.Q9TNN7
							ACTB								SIGLEC5								COL6A3								ACTB								THBS2								IGLV1-36
							PRSS3P2								THBS2								HLA-C.Q9TNN7								PRSS3P2								TIE1								ITGA7
							PRSS2								TIE1								IGLV1-36								PRSS2								TREM2								NLGN4X
							NRN1								TREM2								ITGA7								NRN1								ERBB4								NLGN4Y
							LCAT								ERBB4								NLGN4X								LCAT								ESAM								ACE
							EFNB1								ESAM								NLGN4Y								EFNB1								INHBB								CALB1
							DOCK10								INHBB								ACE								DOCK10								NME1								LTBP2
							DMXL2								NME1								CALB1								DMXL2								SIGLEC14								MT1M
							C12orf49								SIGLEC14								LTBP2								C12orf49								ACTBL2								MXRA7
							WFDC2								ACTBL2								MT1M								WFDC2								CTSF								NRG3
							TIMP4								CTSF								MXRA7								TIMP4								FRMPD1								SERPINB6
							SPINK1								FRMPD1								NRG3								SPINK1								MDGA2								FAM234B
							SMPD1								MDGA2								SERPINB6								SMPD1								OLFM2								HEXA
							PTPRR								OLFM2								FAM234B								PTPRR								SST								HLA-C.P30505
							LTBP4								SST								HEXA								LTBP4								TNR								HLA-H
							A1BG								TNR								HLA-C.P30505								A1BG								WSCD2								EFCAB14
							SLITRK1								WSCD2								HLA-H								SLITRK1								ADAM9								ERAP2
							NECTIN1								ADAM9								EFCAB14								NECTIN1								B4GALNT1								KRT26
							COL18A1								B4GALNT1								ERAP2								COL18A1								CEND1								SRGN
							CNTFR								CEND1								KRT26								CNTFR								F10								TMPRSS5
							CDH15								F10								SRGN								CDH15								LTBP2								HLA-DQA2
							BMP1								LTBP2								TMPRSS5								BMP1								NPDC1								KRT5
							ASTN1								NPDC1								HLA-DQA2								ASTN1								NRP2								B3GAT3
							ACACA								NRP2								KRT5								ACACA								SLPI								CDH11
							MANEAL								SLPI								B3GAT3								MANEAL								ABCA2								DDT
							LRIG2								ABCA2								CDH11								LRIG2								ATRN								EIF4B
							KRT5								ATRN								DDT								KRT5								C1QA								GABARAP
							SIRPB1								C1QA								EIF4B								SIRPB1								C1QL3								GABARAPL1
							PILRA								C1QL3								GABARAP								PILRA								PCDHGA11								HLA-DRA
							PGRMC1								PCDHGA11								GABARAPL1								PGRMC1								PCDHGA12								PRSS2
							KLK10								PCDHGA12								HLA-DRA								KLK10								PCDHGA7								PRSS3P2
							IGHV1-69-2								PCDHGA7								PRSS2								IGHV1-69-2								TMPRSS13								UIMC1
							GALNT13								TMPRSS13								PRSS3P2								GALNT13								CHID1								VAPB
							FGFR3								CHID1								UIMC1								FGFR3								GOLIM4								ZP2
							FAM19A1								GOLIM4								VAPB								FAM19A1								GPR37L1								C4A
							EDIL3								GPR37L1								ZP2								EDIL3								IGLV3-12								C7
							ARSA								IGLV3-12								C4A								ARSA								PCP4								FAM20B
							AKR1B1								PCP4								C7								SIRPB1.O00241								PRSS1								KRT9
							SIRPB1.O00241								PRSS1								FAM20B								RAB1C								ACTB								XPNPEP1
							RAB1C								ACTB								KRT9								RAB1B								BACE1								APOC1
							RAB1B								BACE1								XPNPEP1								RAB1A								CD200								BCKDK
							RAB1A								CD200								APOC1								NLGN1								CLUL1								COL3A1
							NLGN1								CLUL1								BCKDK								LGALS3								CTSH								DPYSL2
							LGALS3								CTSH								COL3A1								IGLV3-27								FGD1								FMOD
							IGLV3-27								FGD1								DPYSL2								IGFBP6								FGFR3								HLA-C.P10321
							GALNT7								FGFR3								HLA-C.P10321								GALNT7								TFPI								TMEM245
							CD59								TFPI								TMEM245								CD59								CDH15								ULBP2
							TMPRSS13								CDH15								ULBP2								TMPRSS13								FAM19A4								FBN2
							THBS2								FAM19A4								FBN2								THBS2								IGFBP6								FGL2
							MRC2								LTA4H								FGL2								MRC2								LTA4H								LRRTM4
							IGLV6-57								TMEM59L								LRRTM4								IGLV6-57								TMEM59L								SEMA3C
							IGLV1-40								UBQLN1								SEMA3C								IGLV1-40								UBQLN1								CORO1A
							FCGBP								GANAB								CORO1A								FCGBP								GANAB								EIF4G3
							EFNA5								MRC1								EIF4G3								EFNA5								MRC1								HLA-A.P01891
							CTSH								NUCB2								HLA-A.P01891								CTSH								NUCB2								HLA-A.P16190
							CNDP1								PRKAR1A								HLA-A.P16190								CNDP1								PRKAR1A								HLA-A.P30453
							ANG								SLC34A3								HLA-A.P30453								ANG								SLC34A3								HLA-A.P30457
							RCN1								ADAMTS1								HLA-A.P30457								RCN1								ADAMTS1								ITM2B
							PLOD1								CDH8								ITM2B								PLOD1								CDH8								LAMC3
							PKDCC								MXRA7								LAMC3								PKDCC								MXRA7								LTF
							NTNG1								RARRES2								LTF								NTNG1								RARRES2								OLFM2
							METRNL								SQSTM1								OLFM2								METRNL								SQSTM1								RNASE2
							ITM2B								HSPG2								RNASE2								ITM2B								KCTD12								SMPDL3A
							GABARAPL2								KCTD12								SMPDL3A								GABARAPL2								PLXNB3								VAT1L
							FAM234B								PLXNB3								VAT1L								FAM234B								POMC								GALNT16
							EFCAB14								POMC								GALNT16								EFCAB14								SLC39A12								HBD
							CBLN2								SLC39A12								HBD								COL1A2								WSCD1								P0DOX2
							C2orf40								WSCD1								P0DOX2								CBLN2								MESD								SHISA8
							TMEM132B								EGFR								SHISA8								C2orf40								BCHE								TMCC1
							ROBO4								MESD								TMCC1								TMEM132B								MPZ								CALY
							PLXDC1								BCHE								CALY								ROBO4								PKDCC								CD109
							MXRA8								MPZ								CD109								PLXDC1								PLXNA4								HLA-C.Q29963
							LAMC3								PKDCC								HLA-C.Q29963								MXRA8								BMP1								IGHA1
							GPRC5B								PLXNA4								IGHA1								LAMC3								CCSMST1								LIMA1
							ADM								BMP1								LIMA1								GPRC5B								CDH20								LPL
							TNNC2								CCSMST1								LPL								ADM								COL2A1								MARS
							PLXNB3								CDH20								MARS								TNNC2								CSMD2								SNCB
							P4HB								COL2A1								SNCB								PLXNB3								LCAT								WFIKKN2
							OVCH2								CSMD2								WFIKKN2								P4HB								MAPK1								COL1A2
							MATN2								LCAT								FSTL1								OVCH2								PFN2								FSTL1
							LAMA2								MAPK1								GRP								MATN2								ROBO2								GRP
							KRT28								PFN2								HSPA13								LAMA2								TPBG								HSPA13
							CLMP								ROBO2								PGM1								KRT28								CDH10								PGM1
							RNASE1								TPBG								PGRMC2								CLMP								CNTN5								PGRMC2
							POTEE								CDH10								PLXNB3								RNASE1								EMILIN1								PLXNB3
							PGRMC2								CNTN5								IL6R								POTEE								EMILIN2								IL6R
							TMPRSS5								EMILIN1								KRT1								PGRMC2								KIAA0319L								KRT1
							POTEKP								EMILIN2								KRT12								TMPRSS5								TNXB								KRT12
							POTEF								KIAA0319L								DSG2								POTEKP								TPT1P8								DSG2
							LGI1								TNXB								HYAL1								POTEF								VAT1L								HYAL1
							FGFR2								TPT1P8								RARRES2								LGI1								ADAM10								RARRES2
							CSF2RA								VAT1L								SLC6A1								FGFR2								AHNAK								SLC6A1
							C4BPB								ADAM10								TLL2								CSF2RA								DLK2								TLL2
							ATP6AP2								AHNAK								ACYP1								C4BPB								NDST3								ACYP1
							ACP2								DLK2								CTHRC1								ATP6AP2								NDST4								CTHRC1
							TNFRSF12A								NDST3								IGHV5-10-1								ACP2								OLFML2A								IGHV5-10-1
							SHH								NDST4								MSTN								TNFRSF12A								OVCH2								MSTN
							MT1M								OLFML2A								RPN2								SHH								PRSS2								RPN2
							KRT74								OVCH2								UGT8								MT1M								PRSS3P2								UGT8
							KRT73								PRSS2								CALB2								KRT74								SCUBE2								CALB2
							KRT71								PRSS3P2								CSTB								KRT73								TMEM132E								CSTB
							IGHV4-4								SCUBE2								FOLR1								KRT71								UGT8								FOLR1
							AQP4								TMEM132E								HLA-A.P16189								IGHV4-4								ALDH2								HLA-A.P16189
							ADAM9								UGT8								HLA-A.P30459								AQP4								B3GNT9								HLA-A.P30459
							VIT								ALDH2								PDGFRB								ADAM9								COL6A2								PDGFRB
							UBQLN2								B3GNT9								IGHV3-49								VIT								FLNC								IGHV3-49
							TFRC								COL6A2								MANF								UBQLN2								JAG1								MANF
							SIRPG								FLNC								SAA1								TFRC								PEBP4								SAA1
							SIRPA								JAG1								ZADH2								SIRPG								SELENOF								ZADH2
							HSPA1A								PEBP4								ADAM10								SIRPA								TNFRSF12A								ADAM10
							GLDN								SELENOF								CPLX2								HSPA1A								A8MTW9								CPLX2
							GALC								TNFRSF12A								IGSF1								GLDN								ADAM28								IGSF1
							DDR1								A8MTW9								MDK								GALC								CLMP								MDK
							CACNA2D1								ADAM28								SAA2								DDR1								CORO1A								SAA2
							ADGRL3								CLMP								DEFB1								CACNA2D1								FITM1								DEFB1
							THBS1								CORO1A								PRDX4								ADGRL3								PCSK5								PRDX4
							NME1								FITM1								STYK1								THBS1								PDIA4								STYK1
							IGHV2-70								PCSK5								TIMP2								NME1								PLXNB1								TIMP2
							GNRH1								PDIA4								VIT								IGHV2-70								PRSS23								VIT
							APOM								PLXNB1								ROBO4								GNRH1								RAB10								ROBO4
							ABI3BP								PRSS23								TIMP4								APOM								RAB15								TIMP4
							GDF11								RAB10								TNXB								ABI3BP								RAB35								TNXB
							FGD1								RAB15								CPN1								GDF11								RAB8A								CPN1
							SERPINA5								RAB35								FABP5P3								FGD1								RAB8B								FABP5P3
							KDM2A								RAB8A								PLA1A								SERPINA5								SMPDL3A								PLA1A
							IGLV3-19								RAB8B								PTPRJ								KDM2A								CD109								PTPRJ
							IGHV1-18								SMPDL3A								LAMA4								IGLV3-19								MRC2								LAMA4
							WDR1								CD109								LSR								IGHV1-18								SIAE								LSR
							PSAT1								MRC2								PTPRK								WDR1								SRPX								PTPRK
							NEU1								SIAE								VAPA								PSAT1								BMP6								VAPA
							KRT31								SRPX								BMP1								NEU1								FKBP2								BMP1
							IGHV1-46								BMP6								C1QTNF3								KRT31								ITGB1								C1QTNF3
							GRB2								FKBP2								FAP								IGHV1-46								POTEE								FAP
							ESAM								ITGB1								GOLIM4								GRB2								SEMA3C								GOLIM4
							TMEM132D								POTEE								IGHV1-2								ESAM								ADAMTS8								IGHV1-2
							PIANP								SEMA3C								LGALS3								TMEM132D								ADGRG1								LGALS3
							PCYOX1								ADAMTS8								A4GALT								PIANP								DDT								A4GALT
							LCN2								ADGRG1								DCD								PCYOX1								HMCN1								DCD
							ANTXR1								DDT								AMY1A								LCN2								HSPA1A								AMY1A
							VMO1								HMCN1								AMY2A								ANTXR1								POTEF								AMY2A
							SIL1								HSPA1A								ASAH1								VMO1								ST6GALNAC1								ASAH1
							SAA4								POTEF								CCK								SIL1								ABHD14A								CCK
							RTN4R								ST6GALNAC1								CDH12								SAA4								IGFBP3								CDH12
							LRTM2								ABHD14A								PTPRR								RTN4R								MOXD1								PTPRR
							IGLL5								IGFBP3								TNC								LRTM2								NPTX2								TNC
							EPHB2								MOXD1								WSCD1								IGLL5								ADCYAP1								WSCD1
							SPINK6								NPTX2								ADAM28								EPHB2								BCKDK								ADAM28
							ROBO2								ADCYAP1								DDB1								SPINK6								LRP8								DDB1
							PTPRM								BCKDK								FURIN								ROBO2								TMEM245								FURIN
							NPTN								LRP8								GALNT6								PTPRM								UBQLN2								GALNT6
							MAN2B2								TMEM245								KIT								NPTN								VAPB								KIT
							IGHA1								UBQLN2								KRT222								MAN2B2								FUT8								KRT222
							HS6ST2								VAPB								LAMA2								IGHA1								SPARC								LAMA2
							FZD7								FUT8								PDCD6IP								HS6ST2								TRHDE								PDCD6IP
							FZD2								TRHDE								PRKAR1A								FZD7								XPNPEP1								PRKAR1A
							CGREF1								XPNPEP1								SEL1L								FZD2								C1QB								SEL1L
							C5								C1QB								THBS2								CGREF1								COL1A2								THBS2
							VWC2								FAM20C								TPP1								C5								FAM20C								TPP1
							PON3								GPX5								ARSG								VWC2								GPX5								ARSG
							PAMR1								GPX6								CRISPLD1								PON3								GPX6								CRISPLD1
							P0DOX8								MSTN								PPT1								PAMR1								MSTN								PPT1
							LCP1								ATP4A								UBE2NL								P0DOX8								ATP4A								UBE2NL
							IGKV1-33								IGLV2-18								CRP								LCP1								IGLV2-18								CRP
							GFRA2								NID2								FAM177A1								IGKV1-33								NID2								FAM177A1
							DSG2								PEPD								IGF2R								GFRA2								PEPD								IGF2R
							CSTA								PLEKHB1								IGLV1-40								DSG2								PLEKHB1								IGLV1-40
							CD58								SYT7								IGLV3-27								CSTA								SYT7								IGLV3-27
							ACYP2								ADAM15								NLGN3								CD58								ADAM15								NLGN3
							POTEI								KIT								ATRN								ACYP2								KIT								ATRN
							MAN1A1								DDTL								BCHE								POTEI								DDTL								BCHE
							LYNX1								FAH								CPAMD8								MAN1A1								FAH								CPAMD8
							IGLV3-16								ULBP2								CSTA								LYNX1								ULBP2								CSTA
							FAM20C								ACTA2								FSTL3								IGLV3-16								ACTA2								FSTL3
							CXCL12								ACTC1								PGK2								FAM20C								ACTC1								PGK2
							BCHE								ACTG2								PRELP								CXCL12								ACTG2								PRELP
							TFPI								ARHGEF18								TLL1								BCHE								ARHGEF18								TLL1
							SBSN								GINM1								TMEFF1								TFPI								GINM1								TMEFF1
							PPBP								LRIG1								YWHAB								SBSN								LRIG1								YWHAB
							LOX								NOTCH1								AEBP1								PPBP								NOTCH1								AEBP1
							GDI2								STYK1								CD248								LOX								STYK1								CD248
							CTHRC1								UBQLN4								PCDHGA11								GDI2								UBQLN4								PCDHGA11
							WFDC1								DSC1								PCDHGA12								CTHRC1								DSC1								PCDHGA12
							QSOX2								SEL1L								PCDHGA7								WFDC1								SEL1L								PCDHGA7
							PDIA6								CXCL16								CSPG4								QSOX2								CXCL16								CSPG4
							PCDH17								H2BFS								AQP4								PDIA6								H2BFS								AQP4
							NLGN4Y								HIST1H2BA								GABARAPL2								PCDH17								HIST1H2BA								GABARAPL2
							NLGN4X								HIST1H2BB								GALNT1								NLGN4Y								HIST1H2BB								GALNT1
							LAMB1								HIST1H2BC								NXPH4								NLGN4X								HIST1H2BC								NXPH4
							ICOSLG								HIST1H2BD								DOCK10								LAMB1								HIST1H2BD								DOCK10
							GRIA2								HIST1H2BH								HAPLN2								ICOSLG								HIST1H2BH								HAPLN2
							COL3A1								HIST1H2BJ								NEU1								GRIA2								HIST1H2BJ								NEU1
							CDH7								HIST1H2BK								EMILIN1								COL3A1								HIST1H2BK								EMILIN1
							PGLYRP2								HIST1H2BL								GPRC5B								CDH7								HIST1H2BL								GPRC5B
							PCDHA9								HIST1H2BM								KRT2								PGLYRP2								HIST1H2BM								KRT2
							PCDHA8								HIST1H2BN								APOC2								PCDHA9								HIST1H2BN								APOC2
							PCDHA7								HIST1H2BO								IGFBP3								PCDHA8								HIST1H2BO								IGFBP3
							PCDHA6								HIST2H2BE								NAGA								PCDHA7								HIST2H2BE								NAGA
							PCDHA5								HIST2H2BF								SIRPB1.O00241								PCDHA6								HIST2H2BF								SIRPB1.O00241
							PCDHA4								PDGFRB								WFDC1								PCDHA5								PDGFRB								WFDC1
							PCDHA3								COL3A1								P4HB								PCDHA4								COL3A1								P4HB
							PCDHA13								GPRC5B								PPBP								PCDHA3								GPRC5B								PPBP
							PCDHA12								MARS								SLC39A12								PCDHA13								MARS								SLC39A12
							NOTCH3								ROBO4								MMP17								PCDHA12								ROBO4								MMP17
							KRT6B								LGI1								NECTIN2								NOTCH3								LGI1								NECTIN2
							DDT								NME2P1								TRHDE								KRT6B								NME2P1								TRHDE
							SPINT2								RAB1A								DLST								DDT								RAB1A								DLST
							SEMA3G								RAB1B								FCGBP								SPINT2								RAB1B								FCGBP
							SEL1L								RAB1C								MED16								SEMA3G								RAB1C								MED16
							SCGB1A1								SYT4								PCP4								SEL1L								SYT4								PCP4
							PTPRJ								POTEJ								SNED1								SCGB1A1								POTEJ								SNED1
							PLEKHB1								S100B								ALDH1A1								PTPRJ								S100B								ALDH1A1
							NTRK3								CRIP1								CBR1								PLEKHB1								CRIP1								CBR1
							APOL1								DSC2								ESD								NTRK3								DSC2								ESD
							TIMP1								EFEMP2								FOLR3								APOL1								EFEMP2								FOLR3
							SERPINA1								FCGR3A								IGF1								TIMP1								FCGR3A								IGF1
							SCN3B								GALNT4								PDIA6								SERPINA1								GALNT4								PDIA6
							RNF139								POTEI								SAA4								SCN3B								POTEI								SAA4
							RELT								SERPINB6								SIRPG								RNF139								SERPINB6								SIRPG
							MIA								HYAL1								UBQLN1								RELT								HYAL1								UBQLN1
							KRT222								MGP								CSF2RA								MIA								MGP								CSF2RA
							HSPA13								NPC1								EHBP1L1								KRT222								NPC1								EHBP1L1
							EXT1								PLAUR								EPHB2								HSPA13								PLAUR								EPHB2
							EFEMP2								TMEM178A								ICAM2								EXT1								TMEM178A								ICAM2
							SEMA6C								NAGA								PLD4								EFEMP2								NAGA								PLD4
							PLXNB1								SEMA3F								RAB10								SEMA6C								SEMA3F								RAB10
							MAN1A2								TIMP4								RAB15								PLXNB1								TIMP4								RAB15
							EPHA5								CLIC4								RAB35								MAN1A2								CLIC4								RAB35
							CD81								COL16A1								RAB8A								EPHA5								COL16A1								RAB8A
							C8G								FRAS1								RAB8B								CD81								FRAS1								RAB8B
							DNAAF1								HIST1H1B								TNFRSF1A								C8G								HIST1H1B								TNFRSF1A
							CLUH								LOX								CNPY2								DNAAF1								LOX								CNPY2
							CFHR2								NAGLU								KRT86								CLUH								NAGLU								KRT86
							NRP2								POTEKP								MATN3								CFHR2								POTEKP								MATN3
							CTNNB1								SLC4A1								PREP								NRP2								SLC4A1								PREP
							C11orf87								CDH3																CTNNB1								CDH3
							TPST1								GALNTL6																C11orf87								GALNTL6
															PAMR1																TPST1								PAMR1
															IGLV3-9																IGLV3-9								IGLV3-9
															PLD5																PLD5								PLD5
															RELT																RELT								RELT
															SEMA6B																SEMA6B								SEMA6B
															CAST																CAST								CAST
															GNS																GNS								GNS
															IGHD																IGHD								IGHD
															TAGLN																TAGLN								TAGLN
															CRP																CRP								CRP
															PCYOX1																PCYOX1								PCYOX1
															ATP1B1																ATP1B1								ATP1B1
															ENTPD6																ENTPD6								ENTPD6
															INPP5D																INPP5D								INPP5D
															SELPLG																SELPLG								SELPLG
															BRCA2																BRCA2								BRCA2
															CDH23																CDH23								CDH23
															VWC2																VWC2								VWC2
															FBN1																FBN1								FBN1
															LYVE1																LYVE1								LYVE1
															SLITRK6																SLITRK6								SLITRK6
															BST1																BST1								BST1
															CFHR5																CFHR5								CFHR5
															FREM2																FREM2								FREM2
															GNB1																GNB1								GNB1
															GNB2																GNB2								GNB2
															GNB4																GNB4								GNB4
															LCP1																LCP1								LCP1
															NXPH3																NXPH3								NXPH3
															PRG4																PRG4								PRG4
															TUBB6																TUBB6								TUBB6
															ADM																ADM								ADM
															C1QC																C1QC								C1QC
															CALML5																CALML5								CALML5
															CLEC11A																CLEC11A								CLEC11A
															FCGBP																FCGBP								FCGBP
															PLA1A																PLA1A								PLA1A
															VIT																VIT								VIT
															CDKL1																CDKL1								CDKL1
															DRAXIN																DRAXIN								DRAXIN
															IGF1																IGF1								IGF1
															SAA2																SAA2								SAA2
															SPANXA2-OT1																SPANXA2-OT1								SPANXA2-OT1
															ACVR1B																ACVR1B								ACVR1B
															KIAA0319																KIAA0319								KIAA0319
															MET																MET								MET
															PLS1																PLS1								PLS1
															S100A9																S100A9								S100A9
															A6NNZ2																A6NNZ2								A6NNZ2
															CHST3																CHST3								CHST3
															CRISPLD1																CRISPLD1								CRISPLD1
															FCGR2A																FCGR2A								FCGR2A
															FCGR2C																FCGR2C								FCGR2C
															SAA1																SAA1								SAA1
															TUBB1																TUBB1								TUBB1
															TUBB8																TUBB8								TUBB8
															ADAMTSL2																ADAMTSL2								ADAMTSL2
															HSPA13																HSPA13								HSPA13
															IFI30																IFI30								IFI30
															LRRN1																LRRN1								LRRN1
															MED16																MED16								MED16
															PLOD3																PLOD3								PLOD3
															SPON2																SPON2								SPON2
															C8B																C8B								C8B
															EMILIN3																EMILIN3								EMILIN3
															FAM49B																FAM49B								FAM49B
															HEXA																HEXA								HEXA
															HIST1H1E																HIST1H1E								HIST1H1E
															IGHV5-10-1																IGHV5-10-1								IGHV5-10-1
															MACO1																MACO1								MACO1
															PRELP																PRELP								PRELP
															PROC																PROC								PROC
															FSTL3																FSTL3								FSTL3
															PLOD1																PLOD1								PLOD1
															CALCA																CALCA								CALCA
															CALCA.P06881																CALCA.P06881								CALCA.P06881
															EHBP1L1																EHBP1L1								EHBP1L1
															GSTO1																GSTO1								GSTO1
															PTPRJ																PTPRJ								PTPRJ
															RPN2																RPN2								RPN2
															EXOC3L4																EXOC3L4								EXOC3L4
															GALNT15																GALNT15								GALNT15
															IFNAR1																IFNAR1								IFNAR1
															SPINK2																SPINK2								SPINK2
															DDAH2																DDAH2								DDAH2
															GDI2																GDI2								GDI2
															KRT26																KRT26								KRT26
															OXT																OXT								OXT
															TIMP1																TIMP1								TIMP1
															CCDC40																CCDC40								CCDC40
															ACTN4																ACTN4								ACTN4
															GZMH																GZMH								GZMH
															KITLG																KITLG								KITLG
															MFRP																MFRP								MFRP
															HIST3H2BB																HIST3H2BB								HIST3H2BB
															RAB12																RAB12								RAB12
															RAB14																RAB14								RAB14
															RAB30																RAB30								RAB30
															RAB33B																RAB33B								RAB33B
															RAB37																RAB37								RAB37
															RAB39A																RAB39A								RAB39A
															RAB39B																RAB39B								RAB39B
															RAB3A																RAB3A								RAB3A
															RAB3B																RAB3B								RAB3B
															RAB3C																RAB3C								RAB3C
															RAB3D																RAB3D								RAB3D
															RAB43																RAB43								RAB43
															RAB6A																RAB6A								RAB6A
															RAB6B																RAB6B								RAB6B
															CD177																CD177								CD177
															COL11A1																COL11A1								COL11A1

## Sheet: Significant proteins
Supplementary Table 4: Comparisons of significant protein changes in AppNL-F/NL-F and AppNL-G-F/NL-G-F mice vs NC/MCI/AD (abnormal-amyloid/abnormal-tau subjects)
AppNL-F/NL-F vs human (NC, MCI and AD) comparisons																								AppNL-G-F/NL-G-F vs human (NC, MCI and AD) comparisons
AD (abeta +, tau +) vs AppNL-F/NL-F								MCI (abeta +, tau +) vs AppNL-F/NL-F								NC (abeta +, tau +) vs AppNL-F/NL-F								AD (abeta +, tau +) vs AppNL-G-F/NL-G-F								MCI (abeta +, tau +) vs AppNL-G-F/NL-G-F								NC (abeta +, tau +) vs AppNL-G-F/NL-G-F
UP in BOTH groups	DOWN in BOTH groups	UP in ONE / DOWN in OTHER		EXLUSIVE UP/DOWN CHANGES				UP in BOTH groups	DOWN in BOTH groups	UP in ONE / DOWN in OTHER		EXLUSIVE UP/DOWN CHANGES				UP in BOTH groups	DOWN in BOTH groups	UP in ONE / DOWN in OTHER		EXLUSIVE UP/DOWN CHANGES				UP in BOTH groups	DOWN in BOTH groups	UP in ONE / DOWN in OTHER		EXLUSIVE UP/DOWN CHANGES				UP in BOTH groups	DOWN in BOTH groups	UP in ONE / DOWN in OTHER		EXLUSIVE UP/DOWN CHANGES				UP in BOTH groups	DOWN in BOTH groups	UP in ONE / DOWN in OTHER		EXLUSIVE UP/DOWN CHANGES
2 common elements in "AD UP " and "AppNL-F/NL-F UP ":	0 common elements in "AD down " and "AppNL-F/NL-F down":	1 common element in "AD UP " and "AppNL-F/NL-F DOWN":	0 common elements in "AD down " and "AppNL-F/NL-F up ":	19 elements included exclusively in "AppNL-F/NL-F down ":	16 elements included exclusively in "AppNL-F/NL-F up ":	16 elements included exclusively in "AD DOWN":	158 elements included exclusively in "AD UP ":	4 common elements in "MCI UP " and "AppNL-F/NL-F UP ":	0 common elements in "MCI down " and "AppNL-F/NL-F down":	8 common elements in "MCI UP " and "AppNL-F/NL-F DOWN":	1 common element in "MCI DOWN" and "AppNL-F/NL-F UP ":	12 elements included exclusively in "AppNL-F/NL-F DOWN":	13 elements included exclusively in "AppNL-F/NL-F UP ":	47 elements included exclusively in "MCI DOWN":	396 elements included exclusively in "MCI UP ":	2 common elements in "NC UP " and "AppNL-F/NL-F UP ":	0 common elements in "NC down " and "AppNL-F/NL-F down":	4 common elements in "NC UP " and "AppNL-F/NL-F DOWN":	1 common element in "NC DOWN" and "AppNL-F/NL-F UP ":	16 elements included exclusively in "AppNL-F/NL-F DOWN":	15 elements included exclusively in "AppNL-F/NL-F UP ":	15 elements included exclusively in "NC DOWN":	222 elements included exclusively in "NC UP ":	4 common elements in "AD UP " and "AppNL-G-F/NL-G-F UP ":	0 common elements in "AD down " and "AppNL-G-F/NL-G-F down":	0 common elements in "AD up" and "AppNL-G-F/NL-G-F down":	2 common elements in "AD UP " and "AppNL-G-F/NL-G-F DOWN":	20 elements included exclusively in "AppNL-G-F/NL-G-F DOWN":	10 elements included exclusively in "AppNL-G-F/NL-G-F UP ":	16 elements included exclusively in "AD DOWN":	155 elements included exclusively in "AD UP ":	4 common elements in "MCI UP " and "AppNL-G-F/NL-G-F UP ":	0 common elements in "MCI down " and "AppNL-G-F/NL-G-F down":	10 common elements in "MCI UP " and "AppNL-G-F/NL-G-F DOWN":	0 common elements in "MCI down " and "AppNL-G-F/NL-G-F up ":	12 elements included exclusively in "AppNL-G-F/NL-G-F DOWN":	10 elements included exclusively in "AppNL-G-F/NL-G-F UP ":	48 elements included exclusively in "MCI DOWN":	394 elements included exclusively in "MCI UP ":	1 common element in "NC UP " and "AppNL-G-F/NL-G-F UP ":	0 common element in "NC down" and "AppNL-G-F/NL-G-F down ":	6 common elements in "NC UP " and "AppNL-G-F/NL-G-F DOWN":	0 common elements in "NC down " and "AppNL-G-F/NL-G-F up ":	16 elements included exclusively in "AppNL-G-F/NL-G-F DOWN":	13 elements included exclusively in "AppNL-G-F/NL-G-F UP ":	16 elements included exclusively in "NC DOWN":	221 elements included exclusively in "NC UP ":
PGAM1		CTSB		CNTN1	DCN	CKM	YWHAZ	CKB		FAM3C	AMBP	CPQ	DCN	GPLD1	ADAM23	PDIA3		CNTN2	ANXA5	CNTN1	DCN	CPB2	ALDOA	PPIA			GOT1	SERPING1	CALM3	CKM	YWHAZ	CKB		APLP1		SERPING1	CALM3	GPLD1	ADAM23	PGAM1		GOT1		SERPING1	CALM3	ANXA5	ALDOA
CKB				CPQ	ANXA5	HBB	YWHAE	PGAM1		NTM		SERPING1	ANXA5	IGHG3	AJAP1	PGAM1		NELL2		CPQ	CKB	IGHV3-20	BASP1	PGAM1			CYCS	COL1A1	APOA2	HBB	YWHAE	PGAM1		CYCS		COL1A1	APOA2	IGHG3	AJAP1			CNTN2		COL1A1	APOA2	CPB2	BASP1
				SERPING1	ITIH1	HBZ	YWHAB	HSPA5		PTGDS		AGT	ITIH1	IGHV3-20	ALDOA			FAM3C		SERPING1	ITIH1	KNG1	BTD	CKB				HSPG2	SERPINA3N	HBZ	YWHAB	PPIA		GOT1		HSPG2	SERPINA3N	IGHV3-20	ALDOA			CYCS		HSPG2	SERPINA3N	IGHV3-20	BTD
				FAM3C	ANXA2	IGHV3-20	VSIG4	PDIA3		NELL2		CTSZ	ANXA2	IGHV3-30	ALDOC			NTM		AGT	ANXA2	MYRF	CAMK2A	CTSB				CNTN1	APOA1	IGHV3-20	VSIG4	CTSB		FAM3C		NUCB1	APOA1	IGHV3-30	ALDOC			FAM3C		CNTN1	APOA1	KNG1	CAMK2A
				AGT	CALM3	PLXNA1	VASN			PIK3IP1		CNTN2	CALM3	IGHV3-43D	AP2B1					CTSB	CALM3	HSPA1A	CHI3L1					NBL1	MUG1	PLXNA1	VASN			NPPC		GSN	MUG1	IGHV3-43D	AP2B1			GSN		NBL1	CKB	MYRF	CHI3L1
				SPARCL1	LUM	ZNF648	UCHL1			SPARCL1		HEXB	LUM	IGHV3-7	APLP1					SPARCL1	LUM	IGHV2-70D	CPD					NUCB1	KLKB1	ZNF648	UCHL1			LSAMP		AGT	KLKB1	IGHV3-7	APP			APLP1		NUCB1	MUG1	HSPA1A	CPD
				CTSZ	LGALS1	C1QTNF1	UBE2V1			CNTN1		A2M	LGALS1	IGHV3-72	APP					CTSZ	LGALS1	SERPINA4	DDAH1					GSN	APOA4	C1QTNF1	UBE2V1			NBL1		PLTP	APOA4	IGHV3-72	BASP1					GM2A	KLKB1	IGHV2-70D	DDAH1
				CNTN2	ATP5B	CA1	UBE2N			CTSB		DKK3	ATP5B	IGHV3-9	BASP1					HEXB	ATP5B	S100A6	ENO2					GM2A	CFL1	CA1	UBE2N			SPARCL1		FN1	CFL1	IGHV3-9	BGLAP					AGT	CTSB	SERPINA4	ENO2
				HEXB	PDIA3	CA2	UBC					NPCC	ITIH4	PRAP1	BGLAP					A2M	ITIH4	ABI3BP	FAIM2					AGT	SERPINA1D	CA2	UBC			CNTN1		FBLN1	SERPINA1D	PRAP1	BLMH					PLTP	APOA4	S100A6	FAIM2
				A2M	ITIH4	CA3	UBB					LYZ2	ATP5A1	ENG	BLMH					DKK3	ATP5A1	FLNA	GAP43					APLP1	EGFR	CA3	UBB			GM2A		VTN	EGFR	ENG	CALM1					FN1	CFL1	ABI3BP	GAP43
				DKK3	ATP5A1	HBA1	UBA52					MAN2B1	LMNA	KNG1	CALM1					NPCC	LMNA	GPLD1	GDA					PLTP		HBA1	UBA52					CNTN2		KNG1	CAMK2A					SPARCL1	SERPINA1D	FLNA	GDA
				NPCC	LMNA	HBD	TPI1					FN1	CFL1	LGMN	CAMK2A					PTGDS	HSPA5	HSPA6	GOT1					FN1		HBD	TPI1					ECM1		LGMN	CDH13					NPPC	PPIA	GPLD1	GSS
				PTGDS	HSPA5	MB	TPD52						GPX3	SPINK1	CDH13					LYZ2	CFL1	OVCH2	GSS					SPARCL1		MB	TPD52							SPINK1	CDH2					FBLN1	EGFR	HSPA6	HPRT1
				NTM	CFL1	NPTX2	TMSB4Y							TGM4	CDH2					PIK3IP1	GPX3	PON1	HPRT1					NPPC		NPTX2	TMSB4Y							TGM4	CHI3L1					VTN		OVCH2	L1CAM
				LYZ2	GPX3	S100A4	TMSB4X							UACA	CHI3L1					MAN2B1	AMBP	PRAP1	L1CAM					FAM3C		S100A4	TMSB4X							UACA	CHRD					ECM1		PON1	LAMP5
				PIK3IP1	AMBP	GPLD1	TMSB10							CFB	CHRD					FN1			LAMP5					FBLN1		GPLD1	TMSB10							AMBP	CLSTN1					LSAMP		PRAP1	LDHAL6A
				MAN2B1			STMN2							CPB2	CLSTN1								LDHAL6A					VTN			STMN2							CFB	CNTNAP2								LDHB
				NELL2			STMN1							CPM	CNTNAP2								LDHB					CNTN2			STMN1							CPB2	COTL1								LDHC
				FN1			SPP1							FCN3	COTL1								LDHC					ECM1			SPP1							CPM	CPD								MDH1
							SPON1							HPX	CPD								MDH1					LSAMP			SPON1							FCN3	DDAH1								NAXE
							SOD2							IGHV1-2	CYCS								NAXE								SOD2							HPX	DTD1								PCDH8
							SNCG							IGHV3-64D	DDAH1								PCDH8								SNCG							IGHV1-2	ENO1								PKM
							SMOC1							IGKC	DTD1								PKM								SMOC1							IGHV3-64D	ENO2								SMOC1
							SH3BGRL3							IGKV1-17	ENO1								SMOC1								SH3BGRL3							IGKC	EPHB6								SOD1
							RPS27A							IGKV2D-30	ENO2								SOD1								RPS27A							IGKV1-17	FABP3								SOD2
							PPIAL4G							IGKV3-20	EPHB6								SOD2								PPIAL4G							IGKV2D-30	FAIM2								SPP1
							PPIAL4E							IGKV3D-20	FABP3								SPP1								PPIAL4E							IGKV3-20	FKBP1A								STMN2
							PPIAL4D							IGKV4-1	FAIM2								STMN2								PPIAL4D							IGKV3D-20	FRZB								YWHAH
							PPIAL4C							P0DOX7	FKBP1A								YWHAH								PPIAL4C							IGKV4-1	GAP43								AJAP1
							PPIAL4A							APCS	FRZB								AJAP1								PPIAL4A							P0DOX7	GDA								ALCAM
							PPIA							CHMP4A	GAP43								ALCAM								PMP2							APCS	GDI1								AP2B1
							PMP2							F13B	GDA								AP2B1								PKM							CHMP4A	GGCT								APP
							PKM							IGHV5-51	GDI1								APP								PGK1							F13B	GLRX								C4orf48
							PGK1							IGKV2-29	GGCT								C4orf48								PGAM4							IGHV5-51	GMFB								CACNA2D1
							PGAM4							IGKV2D-26	GLRX								CACNA2D1								PEBP1							IGKV2-29	GMFG								CACNA2D3
							PEBP1							IGKV2D-29	GMFB								CACNA2D3								PARK7							IGKV2D-26	GOT2								CANT1
							PARK7							IGKV3-15	GMFG								CANT1								NRGN							IGKV2D-29	GPI								CNTNAP2
							NRGN							IGKV3D-7	GOT1								CNTNAP2								NEFL							IGKV3-15	GSS								CXorf36
							NEFL							P0DOX2	GOT2								CXorf36								MIF							IGKV3D-7	HPRT1								FBLN7
							MIF							SERPINA4	GPI								FBLN7								MDH1							P0DOX2	HSPA8								GALNS
							MDH1							TRIM3	GSS								GALNS								MARCKS							SERPINA4	HSPA9								GDI1
							MARCKS							CFP	HPRT1								GDI1								MAPT							TRIM3	IMPA1								GSR
							MAPT							COL21A1	HSPA8								GSR								LDHC							CFP	IMPAD1								HS6ST3
							LDHC							IGHG2	HSPA9								HS6ST3								LDHB							COL21A1	L1CAM								ICAM5
							LDHB							IGHV3-64	IMPA1								ICAM5								LDHAL6A							IGHG2	LAIR2								IL18BP
							LDHAL6A							IGKJ1	IMPAD1								IL18BP								LDHA							IGHV3-64	LDHA								IL1RAPL1
							LDHA							IGKV2-24	L1CAM								IL1RAPL1								LAIR2							IGKJ1	LDHAL6A								IMPAD1
							LAIR2								LAIR2								IMPAD1								LAIR1							IGKV2-24	LDHB								KIAA1549L
							LAIR1								LDHA								KIAA1549L								IMPA1								LDHC								LAIR1
							IMPA1								LDHAL6A								LAIR1								HPRT1								LFNG								MARCKS
							HPRT1								LDHB								MARCKS								GPI								LRRC4								MELTF
							GPI								LDHC								MELTF								GOT2								MAPT								NFASC
							GOT2								LFNG								NFASC								GMFG								MARCKS								NOTCH1
							GOT1								LRRC4								NOTCH1								GMFB								MDH1								NRN1
							GMFG								MAPT								NRN1								GDI1								MEGF10								NRXN1
							GMFB								MARCKS								NRXN1								GDA								MGAT5								NRXN3
							GDI1								MDH1								NRXN3								GAP43								MIF								PARK7
							GDA								MEGF10								PARK7								FRZB								NAXE								PCSK5
							GAP43								MGAT5								PCSK5								FKBP1A								NDRG4								PDIA3
							FRZB								MIF								PEBP1								FCGR3A								NEFL								PEBP1
							FKBP1A								NAXE								PLD3								FABP3								NRGN								PLD3
							FCGR3A								NDRG4								PRRT2								ENO2								NUTF2								PRRT2
							FABP3								NEFL								RGMA								ENO1								NXPH1								RGMA
							ENO2								NRGN								SLC39A10								EMILIN1								PARK7								SLC39A10
							ENO1								NUTF2								SLITRK1								DDAH1								PCDH7								SLITRK1
							EMILIN1								NXPH1								SPON1								COTL1								PCMT1								SPON1
							DDAH1								PARK7								ST8SIA3								CHI3L1								PEA15								ST8SIA3
							COTL1								PCDH7								STMN1								CAMK2D								PEBP1								STMN1
							CHI3L1								PCMT1								TAGLN3								CAMK2A								PGAM4								TAGLN3
							CAMK2D								PEA15								TGFBR2								CALM1								PGK1								TGFBR2
							CAMK2A								PEBP1								VSTM2A								BASP1								PGM1								VSTM2A
							CALM1								PGAM4								ALDOC								AP2B1								PKM								ALDOC
							BASP1								PGK1								ATP6AP2								ALDOA								PLD3								ATP6AP2
							AP2B1								PGM1								BCAN								YWHAH								PMP2								BCAN
							ALDOA								PKM								C14orf37								WDR11								PPIAL4A								C14orf37
							YWHAH								PLD3								CELSR2								WBP2								PRNP								CELSR2
							WDR11								PMP2								CGREF1								VAPB								PRRT2								CGREF1
							WBP2								PPIA								CHGA								TXN								RAD23B								CHGA
							VAPB								PPIAL4A								CHRD								TNFRSF1A								RGMA								CHRD
							TXN								PRNP								CLSTN1								THBS4								RPS27A								CLSTN1
							TNFRSF1A								PRRT2								CLSTN3								TBCA								RTN1								CLSTN3
							THBS4								RAD23B								CRYM								TAGLN3								SEMA4B								CRYM
							TBCA								RGMA								ENPP5								SYT1								SERPINI1								ENPP5
							TAGLN3								RPS27A								FGFR2								SOD1								SH3BGRL3								FGFR2
							SYT1								RTN1								FUCA1								RTN1								SMOC1								FUCA1
							SOD1								SEMA4B								GMFB								PLXDC2								SNCG								GMFB
							RTN1								SERPINI1								IL6ST								PLD3								SOD1								IL6ST
							PLXDC2								SH3BGRL3								LAIR2								PGK2								SOD2								LAIR2
							PLD3								SMOC1								LAMP1								PCSK1N								SORCS2								LAMP1
							PGK2								SNCG								LAMP2								OMD								SPON1								LAMP2
							PCSK1N								SOD1								LDHA								NUTF2								SPP1								LDHA
							OMD								SOD2								LINGO1								NPEPPSL1								ST8SIA3								LINGO1
							NUTF2								SORCS2								NCAN								NAXE								STMN1								NCAN
							NPEPPSL1								SPON1								NDRG4								MMP14								STMN2								NDRG4
							NAXE								SPP1								NRGN								MDH2								TAC3								NELL2
							MMP14								ST8SIA3								NTNG1								LRP1								TAGLN3								NRGN
							MDH2								STMN1								NUTF2								L1CAM								TBCA								NTNG1
							LRP1								STMN2								OLFM1								IGLV1-36								TMEM132A								NUTF2
							L1CAM								TAC3								OMG								HTRA1								TMSB10								OLFM1
							IGLV1-36								TAGLN3								PCDH10								HSPE1								TMSB4X								OMG
							HTRA1								TBCA								PLXNA2								GGCT								TMSB4Y								PCDH10
							HSPE1								TMEM132A								PRKCSH								GAPDHS								TPD52								PLXNA2
							GGCT								TMSB10								PSAP								EFEMP1								TPI1								PRKCSH
							GAPDHS								TMSB4X								PTPRG								CXCL16								TXN								PSAP
							EFEMP1								TMSB4Y								PTPRZ1								CD44								UBA52								PTPRG
							CXCL16								TPD52								RGMB								BLMH								UBB								PTPRZ1
							CD44								TPI1								RPS27A								ALDOC								UBC								RGMB
							BLMH								TXN								SEMA6D								SYT2								UBE2V1								RPS27A
							ALDOC								UBA52								SEMA7A								ST8SIA3								UCHL1								SEMA6D
							SYT2								UBB								SEZ6L								SHISA4								VSIG4								SEMA7A
							ST8SIA3								UBC								SYT2								RNASET2								VSTM2A								SEZ6L
							SHISA4								UBE2V1								TPD52								PRRT2								WBP2								SYT2
							RNASET2								UCHL1								UBA52								NDRG4								YWHAB								TPD52
							PRRT2								VSIG4								UBB								MIA3								YWHAE								UBA52
							NDRG4								VSTM2A								UBC								LIPA								YWHAH								UBB
							MIA3								WBP2								ADCYAP1								GSS								YWHAZ								UBC
							LIPA								YWHAB								ADGRB2								GSR								ADGRB1								ADCYAP1
							GSS								YWHAE								ADGRB3								FCGR3B								AGRN								ADGRB2
							GSR								YWHAH								ADGRL3								FABP7								ALCAM								ADGRB3
							FCGR3B								YWHAZ								APLP2								DLD								APLP2								ADGRL3
							FABP7								ADGRB1								B4GAT1								COL15A1								ART3								APLP2
							DLD								AGRN								CA11								YWHAG								B4GALT1								B4GAT1
							COL15A1								ALCAM								CAMK2B								TK2								BCAN								CA11
							YWHAG								APLP2								CAMK2G								STX12								BTD								CAMK2B
							TK2								ART3								CBLN4								SPOCK2								C14orf37								CAMK2G
							STX12								B4GALT1								CD99L2								PTN								CACNA2D1								CBLN4
							SPOCK2								BCAN								CDH13								MAG								CALY								CD99L2
							PTN								BTD								CDH2								LMAN1								CANX								CDH13
							MAG								C14orf37								CHL1								KCTD12								CCDC126								CDH2
							LMAN1								CACNA2D1								CSF1								HSPA9								CD99L2								CHL1
							KCTD12								CALY								CYCS								HK1								CDH18								CSF1
							HSPA9								CANX								DPP7								GLRX								CDH4								DPP7
							HK1								CCDC126								DTD1								FBLN7								CHGA								DTD1
							GLRX								CD99L2								EFNA3								ECM2								CHL1								EFNA3
							FBLN7								CDH18								EXTL2								CSTB								CHST10								EXTL2
							ECM2								CDH4								FBLN2								CPLX2								CLU								FBLN2
							CYCS								CHGA								GFRA2								ATOX1								COLEC12								GFRA2
							CSTB								CHL1								GRIA4								VAPA								CRTAC1								GRIA4
							CPLX2								CHST10								GSN								TMEM132A								CRYM								IMPA1
							ATOX1								CLU								IMPA1								SORCS2								CSF1								ISLR2
							VAPA								COLEC12								ISLR2								SH3BGRL								CST3								KIAA0319
							TMEM132A								CRTAC1								KIAA0319								PLXNA2								CSTB								LRP1
							SORCS2								CRYM								LRP1								PALM								DAG1								MANSC1
							SH3BGRL								CSF1								MANSC1								NPC2								DPP10								MAPT
							PLXNA2								CST3								MAPT								MGAT5								DPP6								MDH2
							PALM								CSTB								MDH2								MASP1								DPT								MEGF10
							NPC2								DAG1								MEGF10								LAMP2								DPYSL2								MGAT5
							MGAT5								DPP10								MGAT5								LAMP1								EPHA5								MIF
							MASP1								DPP6								MIF								HSPA8								EXTL2								MT1A
							LAMP2								DPT								MT1A								EPDR1								FAM19A5								MT1G
							LAMP1								DPYSL2								MT1G								DBI								FBLN7								MT1H
							HSPA8								EPHA5								MT1H								COLEC12								GAPDHS								MT1X
							EPDR1								EXTL2								MT1X								CHRD								GLA								MT2A
							DBI								FAM19A5								MT2A								APP								HEG1								NEO1
							COLEC12								FBLN7								NEO1								APLP2								HEPACAM								NPTN
							CHRD								GAPDHS								NPTN																HFE2								NPTX1
							APP								GLA								NPTX1																HLA-C.P30499								NRCAM
							APLP2								HEG1								NRCAM																HLA-G								NTM
															HEPACAM								NXPH2																HS6ST3								NXPH2
															HFE2								PALM																HSP90B2P								PALM
															HLA-C.P30499								PAM																HSPA5								PAM
															HLA-G								PCDH9																HTRA1								PCDH9
															HS6ST3								PCDHGC3																HYOU1								PCDHGC3
															HSP90B2P								PLXDC2																ICAM5								PLXDC2
															HTRA1								QDPR																KLK6								QDPR
															HYOU1								SERPINI1																LAIR1								SERPINI1
															ICAM5								SEZ6L2																LAMP2								SEZ6L2
															KLK6								SKP1																LRP1								SKP1
															LAIR1								SLIT1																MAG								SLIT1
															LAMP2								SYT1																MDH2								SYT1
															LRP1								TMEM132A																MGAT1								TMEM132A
															MAG								TMEM132C																MINPP1								TMEM132C
															MDH2								TNFRSF21																MT3								TNFRSF21
															MGAT1								YIPF3																NCAM2								YIPF3
															MINPP1								APLP1																NCAN								ATP1B2
															MT3								ATP1B2																NEO1								CALR
															NCAM2								CALR																NPEPPSL1								CAMK2D
															NCAN								CAMK2D																NRCAM								CD44
															NEO1								CD44																NRXN1								COTL1
															NPEPPSL1								COTL1																NRXN3								CPE
															NPPC								CPE																NTM								CRTAC1
															NRCAM								CRTAC1																OMD								CTSK
															NRXN1								CTSK																PCDH1								CTSL3P
															NRXN3								CTSL3P																PCDH10								CTSV
															OMD								CTSV																PCDH9								DAG1
															PCDH1								DAG1																PCSK1N								DBI
															PCDH10								DBI																PDGFA								DPP10
															PCDH9								DPP10																PDIA3								DPP6
															PCSK1N								DPP6																PGK2								ENDOD1
															PDGFA								ENDOD1																PIANP								EPDR1
															PGK2								EPDR1																PITHD1								EPHA4
															PIANP								EPHA4																PLXNA2								EPHB6
															PITHD1								EPHB6																PPIAL4C								FAM198B
															PLXNA2								FAM198B																PPIAL4D								FCGR3A
															PPIAL4C								FCGR3A																PPIAL4E								GOT2
															PPIAL4D								GOT2																PPIAL4G								HK1
															PPIAL4E								HK1																PTGDS								HYOU1
															PPIAL4G								HYOU1																PTPRS								IGHV1-3
															PTPRS								IGHV1-3																RGMB								KLK6
															RGMB								KLK6																RNASE6								LRP11
															RNASE6								LRP11																ROBO1								LRTM2
															ROBO1								LRTM2																S100A1								LUZP2
															S100A1								LUZP2																SEMA3A								MSLN
															SEMA3A								MSLN																SEZ6L								NEGR1
															SEZ6L								NEGR1																SEZ6L2								OLFML3
															SEZ6L2								OLFML3																SGCE								PHLDB3
															SGCE								PHLDB3																SLC39A10								POMGNT1
															SLC39A10								POMGNT1																SLIT1								PTN
															SLIT1								PTN																SLITRK1								QPCT
															SLITRK1								QPCT																STMN4								RTN4RL2
															STMN4								RTN4RL2																SYT1								SCN2B
															SYT1								SCN2B																TEX15								SEMA4B
															TEX15								SEMA4B																TGFBR2								SIL1
															TGFBR2								SIL1																THBS4								SORCS2
															THBS4								SORCS2																TMEFF1								SORCS3
															TMEFF1								SORCS3																TNFRSF21								SPOCK2
															TNFRSF21								SPOCK2																UNC5C								STK31
															UNC5C								STK31																VAMP1								SUSD5
															VAMP1								SUSD5																VAMP2								TEX15
															VAMP2								TEX15																VAMP3								TYRO3
															VAMP3								TYRO3																ADGRB3								YWHAE
															ADGRB3								YWHAE																ALDOB
															ALDOB																								ATP6AP2
															ATP6AP2																								B3GALNT1
															B3GALNT1																								B4GAT1
															B4GAT1																								BDNF
															BDNF																								C11orf87
															C11orf87																								CADM2
															CADM2																								CADM3
															CADM3																								CANT1
															CANT1																								CDH6
															CDH6																								CLASRP
															CLASRP																								CNTN3
															CNTN3																								CNTN4
															CNTN4																								COL6A1
															COL6A1																								CTSL
															CTSL																								CUTA
															CUTA																								DBI
															DBI																								DLD
															DLD																								ECM2
															ECM2																								EDIL3
															EDIL3																								ENPP4
															ENPP4																								EPHA4
															EPHA4																								GAS6
															GAS6																								GFRA2
															GFRA2																								HLA-C.P04222
															HLA-C.P04222																								HLA-C.Q29865
															HLA-C.Q29865																								HLA-H
															HLA-H																								HS6ST2
															HS6ST2																								HSP90B1
															HSP90B1																								HSPE1
															HSPE1																								IL6ST
															IL6ST																								LAMP1
															LAMP1																								LMAN1
															LMAN1																								LRRC4B
															LRRC4B																								MLEC
															LSAMP																								MOG
															MLEC																								MT1A
															MOG																								MT1G
															MT1A																								MT1H
															MT1G																								MT1X
															MT1H																								MT2A
															MT1X																								NCAM1
															MT2A																								NEDD8
															NBL1																								NEGR1
															NCAM1																								NELL2
															NEDD8																								NPEPPS
															NEGR1																								NPTX1
															NPEPPS																								NSF
															NPTX1																								NSG1
															NSF																								PAM
															NSG1																								PAPLN
															PAM																								PCDH8
															PAPLN																								PDIA6
															PCDH8																								PIK3IP1
															PDIA6																								PLD4
															PLD4																								POMGNT1
															POMGNT1																								PRKCSH
															PRKCSH																								PRRT3
															PRRT3																								PTPRZ1
															PTPRZ1																								RIDA
															RIDA																								SEC62
															SEC62																								SEMA6D
															SEMA6D																								SH3BGRL
															SH3BGRL																								SHISA5
															SHISA5																								SPOCK3
															SPOCK3																								SULF2
															SULF2																								TALDO1
															TALDO1																								UNC5D
															UNC5D																								VAPA
															VAPA																								ACE
															ACE																								ADAM22
															ADAM22																								ADGRB2
															ADGRB2																								ASPH
															ASPH																								ATP6AP1
															ATP6AP1																								B3GNT2
															B3GNT2																								B4GALT5
															B4GALT5																								BSG
															BSG																								C4orf48
															C4orf48																								CALR
															CALR																								CAMK2D
															CAMK2D																								CASC4
															CASC4																								CENPF
															CENPF																								CGREF1
															CGREF1																								CTSK
															CTSK																								CTSL3P
															CTSL3P																								CTSV
															CTSV																								EFNA3
															EFNA3																								EPHA10
															EPHA10																								FSTL4
															FSTL4																								GALNT7
															GALNT7																								GLO1
															GLO1																								GRIA4
															GRIA4																								HLA-C.P10321
															HLA-C.P10321																								HLA-C.P30501
															HLA-C.P30501																								HLA-C.Q07000
															HLA-C.Q07000																								IDS
															IDS																								IFNAR2
															IFNAR2																								IGSF8
															IGSF8																								LMAN2
															LMAN2																								LRTM2
															LRTM2																								MANSC1
															MANSC1																								MEGF8
															MEGF8																								MGAT3
															MGAT3																								NFASC
															NFASC																								NPC2
															NPC2																								NRXN2.P58401
															NRXN2.P58401																								OMG
															OMG																								OPCML
															OPCML																								PLXDC2
															PLXDC2																								PSAP
															PSAP																								PTPRN2
															PTPRN2																								SCG3
															SCG3																								SCG5
															SCG5																								SCN3B
															SCN3B																								SHISA4
															SHISA4																								SIRPB1
															SIRPB1																								SORCS1
															SORCS1																								SORCS3
															SORCS3																								SORT1
															SORT1																								SPOCK1
															SPOCK1																								SPOCK2
															SPOCK2																								STK31
															STK31																								TMEM132C
															TMEM132C																								TNFRSF1A
															TNFRSF1A																								TYRO3
															TYRO3																								WDR11
															WDR11																								XXYLT1
															XXYLT1																								ACHE
															ACHE																								ADGRL1
															ADGRL1																								ADGRL3
															ADGRL3																								ATP1B2
															ATP1B2																								C16orf89
															C16orf89																								CD44
															CD44																								CLSTN3
															CLSTN3																								CRELD1
															CRELD1																								DGCR2
															DGCR2																								DNAJC3
															DNAJC3																								DNER
															DNER																								EFNB2
															EFNB2																								ENDOD1
															ENDOD1																								FTH1
															FTH1																								GAPDH
															GAPDH																								HLA-A.Q09160
															GM2A																								HLA-C.Q29963
															HLA-A.Q09160																								IGFBP5
															HLA-C.Q29963																								LPL
															IGFBP5																								MAN2A2
															LPL																								MANEAL
															MAN2A2																								MIA3
															MANEAL																								MMP11
															MIA3																								MMP2
															MMP11																								NDRG2
															MMP2																								NLGN1
															NDRG2																								NPTN
															NLGN1																								NRN1
															NPTN																								OAF
															NRN1																								OLFML3
															OAF																								PALM
															OLFML3																								PCDHAC2
															PALM																								PHLDB3
															PCDHAC2																								PNOC
															PHLDB3																								PRDX1
															PNOC																								PTPRF
															PRDX1																								RMDN3
															PTPRF																								SCG2
															RMDN3																								SCN4B
															SCG2																								SEMA7A
															SCN4B																								SKP1
															SEMA7A																								SNCA
															SKP1																								ST6GAL2
															SNCA																								SUSD5
															ST6GAL2																								SYT2
															SUSD5																								WFIKKN2
															SYT2
															WFIKKN2
